# Supplementary material for: Insights into antibiotic resistomes from metagenome-assembled genomes and gene catalogs of soil microbiota across environments
Source: PeerJ. 2025 Nov 19;13:e20348. doi: 10.7717/peerj.20348 (PMC12640132; doi:10.7717/peerj.20348)
Supplement: Supplemental Information 6 [file peerj-13-20348-s006.xlsx]

## Sheet: TableS1
Table S1: Metagenome - Assembled Genomes data summary of 111 samples.
Samples	Origin	Province	City	County/District	Village/Farm	Altitude	Longitude and latitude	Library	Insert Size (bp)	Read length (bp)	Raw reads(M)	Raw base (Gb)	Clean reads(M)	Clean base(Gb)	Percent in raw reads(%)	Percent in raw bases(%)	Optimized reads(M)	Optimized bases (Gb)	Percent in raw reads (%)	Percent in raw bases (%)	Contigs	Contigs bases(bp)	N50(bp)	N90(bp)	Max(bp)	Min(bp)	ORFs	Total Length(bp)	Average Length(bp)	Max(bp)	Min(bp)
GZE1	Soil	Guizhou	Southwest Guizhou Autonomous Prefecture	Puan	Lanmuqiao Village	1601	104.59,25.35	FDME220102226-2a	500	150	130.246	19.537	128.785	19.2969	98.8778	98.7712	120.224	18.0163	92.3049	92.2162	1785513	1184392639	687	366	93539	300	2320292	1046499954	451.02	10749	102
GZE10	Soil	Guizhou	Southwest Guizhou Autonomous Prefecture	Puan	Lanmuqiao Village	1601	104.59,25.35	FDME220102235-1a	500	150	69.5687	10.4353	68.5788	10.279	98.5771	98.5023	65.2403	9.77867	93.7781	93.7075	880272	537980484	623	362	29718	300	1105251	481873551	435.99	8145	102
GZE11	Soil	Guizhou	Guiyang	Wudang District	Luoba Village	1301	106.58,26.48	FDME220102236-1a	500	150	75.1879	11.2782	75.1312	11.2591	99.9247	99.8309	70.9096	10.6276	94.3099	94.2319	714381	449850782	638	363	38565	300	908726	402402834	442.82	8793	102
GZE12	Soil	Guizhou	Guiyang	Wudang District	Luoba Village	1301	106.58,26.48	FDME220102237-1a	500	150	71.9669	10.795	70.9387	10.6299	98.5712	98.4706	66.7434	10.0026	92.7417	92.659	550960	307344025	564	348	47756	300	661209	273069426	412.99	7776	102
GZE13	Soil	Guizhou	Guiyang	Wudang District	Luoba Village	1301	106.58,26.48	FDME220102238-1a	500	150	70.4127	10.5619	69.387	10.3965	98.5433	98.4341	66.0835	9.90259	93.8517	93.7576	550070	349657251	631	356	210902	300	708930	314833770	444.1	31986	102
GZE14	Soil	Guizhou	Guiyang	Wudang District	Luoba Village	1301	106.58,26.48	FDME220102239-1a	500	150	67.7687	10.1653	66.5248	9.96573	98.1646	98.0368	62.1858	9.31821	91.7619	91.6669	433566	244315772	573	349	52307	300	522317	215924784	413.4	7242	102
GZE15	Soil	Guizhou	Guiyang	Wudang District	Luoba Village	1301	106.58,26.48	FDME220102240-1a	500	150	71.9087	10.7863	70.85	10.6175	98.5277	98.4352	67.8684	10.1715	94.3812	94.3004	416667	220816805	540	343	11839	300	489720	198748020	405.84	6270	102
GZE16	Soil	Guizhou	Guiyang	Wudang District	Luoba Village	1301	106.58,26.48	FDME220102241-1a	500	150	70.48	10.572	69.4784	10.411	98.579	98.4767	65.9876	9.88872	93.6261	93.537	433124	241026979	560	345	22590	300	520268	217321434	417.71	8049	102
GZE17	Soil	Guizhou	Guiyang	Wudang District	Luoba Village	1301	106.58,26.48	FDME220102242-1a	500	150	71.2993	10.6949	70.2735	10.5291	98.5613	98.4495	65.9985	9.88997	92.5654	92.4738	363178	196325107	544	343	23161	300	430827	175020045	406.24	4974	102
GZE18	Soil	Guizhou	Guiyang	Wudang District	Luoba Village	1301	106.58,26.48	FDME220102243-1a	500	150	66.3474	9.9521	65.395	9.79829	98.5645	98.4544	61.8416	9.26693	93.2088	93.1153	563482	324409653	583	351	21565	300	686417	289543344	421.82	7869	102
GZE19	Soil	Guizhou	Guiyang	Wudang District	Luoba Village	1301	106.58,26.48	FDME220102244-1a	500	150	77.2229	11.5834	76.0928	11.4009	98.5366	98.4246	71.7096	10.7457	92.8605	92.7675	575153	336172947	589	349	87655	300	712414	301775595	423.6	6003	102
GZE2	Soil	Guizhou	Southwest Guizhou Autonomous Prefecture	Puan	Lanmuqiao Village	1601	104.59,25.35	FDME220102227-1a	500	150	59.2834	8.89251	58.2873	8.73321	98.3198	98.2085	53.4562	8.01106	90.1706	90.0877	343362	186731584	549	344	42781	300	404236	165079662	408.37	4575	102
GZE20	Soil	Guizhou	Guiyang	Xiuwen	Longgui Village	1326	106.35,26.47	FDME220102245-1a	500	150	73.2543	10.9882	72.2107	10.8209	98.5753	98.4776	68.9915	10.3393	94.1808	94.0953	795756	504685826	644	361	38565	300	1015165	446231001	439.56	8937	102
GZE21	Soil	Guizhou	Guiyang	Xiuwen	Longgui Village	1326	106.35,26.47	FDME220102246-1a	500	150	74.6771	11.2016	73.6004	11.0287	98.5581	98.4565	68.9164	10.3279	92.2858	92.2004	815179	506457940	631	359	42817	300	1030795	446716164	433.37	8547	102
GZE22	Soil	Guizhou	Guiyang	Xiuwen	Longgui Village	1326	106.35,26.47	FDME220102247-2a	500	150	72.6987	10.9048	71.67	10.7353	98.5849	98.4453	68.302	10.2334	93.9522	93.8428	623083	375050741	620	354	28717	300	778829	333692139	428.45	6789	102
GZE23	Soil	Guizhou	Guiyang	Xiuwen	Longgui Village	1326	106.35,26.47	FDME220102248-1a	500	150	72.0668	10.81	70.2005	10.518	97.4103	97.2989	66.2755	9.93083	91.9639	91.8669	820890	582972325	740	375	105535	300	1109794	518766096	467.44	8685	102
GZE24	Soil	Guizhou	Guiyang	Xiuwen	Longgui Village	1326	106.35,26.47	FDME220102249-1a	500	150	70.1039	10.5156	69.0685	10.3501	98.523	98.4259	65.5307	9.82087	93.4765	93.3934	542457	323318860	597	353	48637	300	671315	287956017	428.94	13416	102
GZE25	Soil	Guizhou	Guiyang	Xiuwen	Longgui Village	1326	106.35,26.47	FDME220102250-1a	500	150	66.8715	10.0307	65.8815	9.87171	98.5196	98.4147	62.8392	9.41671	93.9701	93.8787	494948	283776337	581	350	41363	300	603247	254208618	421.4	5175	102
GZE26	Soil	Guizhou	Guiyang	Xiuwen	Longgui Village	1326	106.35,26.47	FDME220102251-1a	500	150	70.9063	10.6359	69.8847	10.4714	98.5592	98.4531	66.6657	9.9901	94.0194	93.9277	402305	217913874	553	345	14774	300	475632	196447890	413.02	5187	102
GZE27	Soil	Guizhou	Guiyang	Xiuwen	Longgui Village	1326	106.35,26.47	FDME220102252-1a	500	150	71.7506	10.7626	70.8097	10.6097	98.6887	98.5795	67.1439	10.0618	93.5795	93.4887	592069	358733596	616	357	33629	300	745296	320640441	430.22	7842	102
GZE28	Soil	Guizhou	Guiyang	Xiuwen	Longgui Village	1326	106.35,26.47	FDME220102253-1a	500	150	67.4848	10.1227	66.5547	9.97051	98.6218	98.4963	62.2996	9.33499	92.3164	92.2182	661515	406807072	622	357	54998	300	825993	358787502	434.37	7749	102
GZE3	Soil	Guizhou	Southwest Guizhou Autonomous Prefecture	Puan	Lanmuqiao Village	1601	104.59,25.35	FDME220102228-1a	500	150	69.9923	10.4988	69.323	10.3864	99.0438	98.9287	64.9876	9.73829	92.8497	92.7559	460257	249292165	547	346	27210	300	549225	226085472	411.64	8682	102
GZE4	Soil	Guizhou	Southwest Guizhou Autonomous Prefecture	Puan	Lanmuqiao Village	1601	104.59,25.35	FDME220102229-2a	500	150	66.8738	10.0311	66.8679	10.0222	99.9912	99.912	64.3853	9.6506	96.2788	96.2071	696842	438274042	642	364	50369	300	883230	392710293	444.63	5076	102
GZE5	Soil	Guizhou	Southwest Guizhou Autonomous Prefecture	Puan	Lanmuqiao Village	1601	104.59,25.35	FDME220102230-1a	500	150	65.5301	9.82951	64.6026	9.67944	98.5847	98.4733	61.1237	9.15961	93.2758	93.1848	364789	193981081	540	342	10007	300	426831	173380578	406.2	5427	102
GZE6	Soil	Guizhou	Southwest Guizhou Autonomous Prefecture	Puan	Lanmuqiao Village	1601	104.59,25.35	FDME220102231-1a	500	150	73.5777	11.0367	72.5065	10.8628	98.5441	98.4243	68.7524	10.3013	93.4418	93.3375	809678	497512011	628	359	58935	300	1024806	446821938	436.01	8547	102
GZE7	Soil	Guizhou	Southwest Guizhou Autonomous Prefecture	Puan	Lanmuqiao Village	1601	104.59,25.35	FDME220102232-1a	500	150	74.889	11.2334	73.827	11.0622	98.5818	98.4767	70.0004	10.49	93.4722	93.3827	843650	559908657	675	363	535297	300	1094250	498744561	455.79	18564	102
GZE8	Soil	Guizhou	Southwest Guizhou Autonomous Prefecture	Puan	Lanmuqiao Village	1601	104.59,25.35	FDME220102233-1a	500	150	70.8574	10.6286	69.8477	10.4657	98.575	98.4674	65.796	9.85961	92.857	92.7648	760195	466495192	623	360	54434	300	952906	417166179	437.78	7428	102
GZE9	Soil	Guizhou	Southwest Guizhou Autonomous Prefecture	Puan	Lanmuqiao Village	1601	104.59,25.35	FDME220102234-1a	500	150	72.8653	10.9298	71.8262	10.7622	98.5739	98.4664	68.0452	10.1968	93.385	93.2936	497421	283107991	568	349	51548	300	605341	252804246	417.62	8226	102
SCE1	Soil	Sichuan	Yaan	Yucheng District	Farm of Sichuan Agricultural University	632	102.59, 29.58	FDME220101992-1a	500	150	71.9319	10.7898	70.9327	10.6289	98.611	98.5091	65.658	9.83953	91.278	91.1931	886656	568226785	651	359	311014	300	1130632	502299729	444.26	19077	102
SCE10	Soil	Sichuan	Yaan	Yucheng District	Farm of Sichuan Agricultural University	632	102.59, 29.58	FDME220101998-1a	500	150	65.22	9.783	63.8536	9.56589	97.905	97.7808	59.0932	8.85449	90.606	90.509	500148	314226622	633	358	120793	300	641350	283650438	442.27	6255	102
SCE11	Soil	Sichuan	Chengdu	Chongzhou	Wenchang Village	539	103.37，20.38	FDME220101999-1a	500	150	87.3826	13.1074	86.1759	12.9133	98.619	98.5189	81.299	12.1833	93.038	92.9495	1205568	832419055	721	370	130834	300	1580588	738823737	467.44	12927	102
SCE12	Soil	Sichuan	Chengdu	Chongzhou	Wenchang Village	539	103.37，20.38	FDME220102000-1a	500	150	65.0967	9.7645	63.8967	9.5745	98.1567	98.0541	59.9284	8.98079	92.0605	91.9738	752655	561273059	802	374	109703	300	1050726	504873564	480.5	8475	102
SCE13	Soil	Sichuan	Chengdu	Chongzhou	Wenchang Village	539	103.37，20.38	FDME220102001-1a	500	150	69.6559	10.4484	68.6395	10.2846	98.5408	98.4322	64.9097	9.72675	93.1863	93.0933	388765	228344957	593	350	30442	300	475095	200845593	422.75	9297	102
SCE14	Soil	Sichuan	Chengdu	Chongzhou	Wenchang Village	539	103.37，20.38	FDME220102002-1a	500	150	71.9669	10.795	70.559	10.5724	98.0436	97.9374	67.0276	10.044	93.1366	93.0425	600703	362382889	614	354	555485	300	756683	325513443	430.18	12195	102
SCE15	Soil	Sichuan	Chengdu	Chongzhou	Wenchang Village	539	103.37，20.38	FDME220102003-1a	500	150	72.8259	10.9239	71.743	10.7515	98.513	98.4215	68.1641	10.2156	93.5987	93.5166	866451	769183206	1076	397	209474	300	1311019	683676177	521.48	19032	102
SCE16	Soil	Sichuan	Chengdu	Chongzhou	Wenchang Village	539	103.37，20.38	FDME220102004-1a	500	150	72.4983	10.8747	71.4751	10.6985	98.5886	98.3792	61.6004	9.22778	84.9681	84.8552	597455	415673534	715	365	347032	300	804874	370168647	459.91	18504	102
SCE18	Soil	Sichuan	Chengdu	Chongzhou	Wenchang Village	539	103.37，20.38	FDME220102005-1a	500	150	68.5248	10.2787	67.5423	10.1208	98.5662	98.4635	62.7684	9.4066	91.5995	91.5153	798716	544561195	702	368	284100	300	1062774	487707876	458.9	10599	102
SCE19	Soil	Sichuan	Chengdu	Chongzhou	Wenchang Village	539	103.37，20.38	FDME220102006-1a	500	150	65.6932	9.85399	64.7984	9.70754	98.6379	98.5138	59.0596	8.84997	89.902	89.811	588112	544944525	1201	399	283964	300	903085	475135098	526.12	11859	102
SCE2	Soil	Sichuan	Yaan	Yucheng District	Farm of Sichuan Agricultural University	632	102.59, 29.58	FDME220101993-1a	500	150	77.6477	11.6471	76.5789	11.477	98.6236	98.5393	71.5743	10.7281	92.1783	92.1089	743334	709167545	1244	410	163462	300	1174970	630724470	536.8	12798	102
SCE20	Soil	Sichuan	Chengdu	Chongzhou	Wenchang Village	539	103.37，20.38	FDME220102007-1a	500	150	69.397	10.4095	68.4081	10.2491	98.5751	98.4586	64.0502	9.59746	92.2955	92.1987	393883	219811883	565	345	26963	300	478439	199275021	416.51	12609	102
SCE21	Soil	Sichuan	Chengdu	Pengzhou	Taizi Village	639	103.47，30.59	FDME220102008-1a	500	150	74.7674	11.2151	73.7079	11.0479	98.5829	98.5088	65.3244	9.79328	87.3701	87.3222	418119	418943988	1373	417	289723	300	662888	362375244	546.66	11859	102
SCE22	Soil	Sichuan	Chengdu	Pengzhou	Taizi Village	639	103.47，30.59	FDME220102009-1a	500	150	70.6588	10.5988	69.6752	10.4162	98.6079	98.2768	62.465	9.34512	88.4037	88.1713	472521	470224909	1377	410	229547	300	766101	410235492	535.48	15927	102
SCE23	Soil	Sichuan	Chengdu	Pengzhou	Taizi Village	639	103.47，30.59	FDME220102010-1a	500	150	66.9394	10.0409	65.9828	9.88791	98.5709	98.4762	62.2861	9.33468	93.0484	92.9664	552542	358237429	658	362	557391	300	720239	323742753	449.49	14400	102
SCE24	Soil	Sichuan	Chengdu	Pengzhou	Taizi Village	639	103.47，30.59	FDME220102011-2a	500	150	117.556	17.6333	116.265	17.4228	98.9018	98.8063	109.86	16.4638	93.4538	93.3675	1163919	702331598	603	355	382402	300	1464723	632880792	432.08	14262	102
SCE25	Soil	Sichuan	Chengdu	Pengzhou	Taizi Village	639	103.47，30.59	FDME220102012-1a	500	150	64.6798	9.70198	64.0304	9.59486	98.9959	98.8959	60.4038	9.05244	93.389	93.3051	675297	422472793	635	356	79802	300	857339	375389511	437.85	13272	102
SCE26	Soil	Sichuan	Chengdu	Pengzhou	Taizi Village	639	103.47，30.59	FDME220102013-1a	500	150	71.2767	10.6915	69.8879	10.4736	98.0515	97.962	66.266	9.93137	92.9702	92.8903	520478	314141183	602	353	338039	300	656273	283107792	431.39	12195	102
SCE27	Soil	Sichuan	Chengdu	Pengzhou	Taizi Village	639	103.47，30.59	FDME220102014-1a	500	150	75.0553	11.2583	74.2708	11.1328	98.9548	98.8854	70.0316	10.4985	93.3067	93.2516	481130	277609579	584	349	24492	300	588985	250662264	425.58	7677	102
SCE28	Soil	Sichuan	Chengdu	Pengzhou	Taizi Village	639	103.47，30.59	FDME220102015-1a	500	150	70.321	10.5481	69.6739	10.442	99.0799	98.9941	65.5238	9.82097	93.1782	93.1061	592528	350545868	596	350	48665	300	734719	317663016	432.36	14376	102
SCE29	Soil	Sichuan	Chengdu	Pengzhou	Taizi Village	639	103.47，30.59	FDME220102016-1a	500	150	91.4596	13.7189	90.6173	13.5825	99.079	99.0056	85.4776	12.813	93.4594	93.3963	703304	414961026	596	352	51794	300	877646	377974401	430.67	5673	102
SCE4	Soil	Sichuan	Yaan	Yucheng District	Farm of Sichuan Agricultural University	632	102.59, 29.58	FDME220101994-1a	500	150	66.1551	9.92327	65.2322	9.77685	98.6049	98.5245	62.3364	9.34359	94.2276	94.1583	350319	401970042	1915	441	218372	300	605662	351173142	579.82	18354	102
SCE5	Soil	Sichuan	Yaan	Yucheng District	Farm of Sichuan Agricultural University	632	102.59, 29.58	FDME220101995-1a	500	150	69.3573	10.4036	68.4394	10.2565	98.6766	98.5856	63.7028	9.54769	91.8472	91.7729	696644	580025673	988	379	274927	300	1022164	515405700	504.23	9255	102
SCE8	Soil	Sichuan	Yaan	Yucheng District	Farm of Sichuan Agricultural University	632	102.59, 29.58	FDME220101996-1a	500	150	67.1824	10.0774	66.1929	9.91745	98.5272	98.4132	61.7753	9.25663	91.9517	91.8557	507453	321592997	633	358	79381	300	654105	289826331	443.09	11400	102
SCE9	Soil	Sichuan	Yaan	Yucheng District	Farm of Sichuan Agricultural University	632	102.59, 29.58	FDME220101997-1a	500	150	101.301	15.1952	99.9088	14.9722	98.6257	98.5328	92.7427	13.8995	91.5516	91.4731	861326	824439672	1261	408	276736	300	1354915	733621086	541.45	15981	102
YGE1	Soil	Jiangsu	Lianyungang	Donghai	Miaohazhuang Village	60	118.32, 34.32	FDME220101902-1a	500	150	72.1447	10.8217	71.1607	10.6611	98.6361	98.5163	67.3064	10.0855	93.2936	93.1966	881793	631103495	743	375	375623	300	1205126	566390865	469.98	23637	102
YGE10	Soil	Jiangsu	Lianyungang	Donghai	Miaohazhuang Village	60	118.32, 34.32	FDME220101911-1a	500	150	73.6944	11.0542	73.0183	10.9438	99.0825	99.0014	69.5395	10.4232	94.3619	94.2918	936761	631133926	699	367	82504	300	1242634	570632961	459.21	12120	102
YGE11	Soil	Jiangsu	Lianyungang	Donghai	Miaohazhuang Village	60	118.32, 34.32	FDME220101912-1a	500	150	73.9908	11.0986	73.0069	10.939	98.6703	98.5615	68.1562	10.2132	92.1145	92.022	477663	265161815	555	345	28003	300	575567	238059390	413.61	4071	102
YGE12	Soil	Jiangsu	Lianyungang	Donghai	Miaohazhuang Village	60	118.32, 34.32	FDME220101913-1a	500	150	70.1331	10.52	69.1588	10.3587	98.6108	98.467	62.4947	9.36397	89.1087	89.0114	619003	415665874	668	360	202350	300	810254	365303736	450.85	14412	102
YGE13	Soil	Jiangsu	Lianyungang	Donghai	Miaohazhuang Village	60	118.32, 34.32	FDME220101914-1a	500	150	83.9277	12.5892	82.8184	12.4105	98.6782	98.581	78.6916	11.793	93.7611	93.6757	647140	378547634	586	351	180810	300	796346	340455474	427.52	7584	102
YGE14	Soil	Jiangsu	Lianyungang	Donghai	Miaohazhuang Village	60	118.32, 34.32	FDME220101915-1a	500	150	84.7074	12.7061	83.5829	12.5243	98.6725	98.569	79.7857	11.9564	94.1897	94.0998	943699	591500055	637	361	145794	300	1201819	531181716	441.98	9378	102
YGE15	Soil	Jiangsu	Lianyungang	Donghai	Miaohazhuang Village	60	118.32, 34.32	FDME220101916-1a	500	150	74.9051	11.2358	73.8729	11.0705	98.622	98.5287	68.6168	10.2837	91.605	91.5268	513680	299135296	585	351	69412	300	629677	266916744	423.89	8253	102
YGE16	Soil	Jiangsu	Lianyungang	Guanyun	Daxing	2	119.24, 34.24	FDME220101917-1a	500	150	72.3458	10.8519	71.3614	10.6933	98.6393	98.5387	67.7407	10.1517	93.6346	93.5475	703247	442022027	643	357	146087	300	878783	386569485	439.89	8835	102
YGE17	Soil	Jiangsu	Lianyungang	Donghai	Miaohazhuang Village	60	118.32, 34.32	FDME220101918-1a	500	150	90.9634	13.6445	89.7618	13.4505	98.679	98.5778	83.8925	12.5722	92.2266	92.141	1257382	824463794	676	361	52842	300	1662320	748166754	450.07	8970	102
YGE18	Soil	Jiangsu	Lianyungang	Guanyun	Daxing	2	119.24, 34.24	FDME220101919-1a	500	150	68.2879	10.2432	67.3024	10.0844	98.5569	98.4499	63.361	9.49463	92.7852	92.6922	505836	297443945	591	354	15536	300	623943	269692425	432.24	8112	102
YGE19	Soil	Jiangsu	Lianyungang	Guanyun	Daxing	2	119.24, 34.24	FDME220101920-1a	500	150	72.7044	10.9057	71.7406	10.7495	98.6744	98.5681	67.9399	10.1809	93.4468	93.3543	512831	303227485	592	352	69611	300	642053	274936392	428.21	5829	102
YGE2	Soil	Jiangsu	Lianyungang	Guanyun	Daxing	2	119.24, 34.24	FDME220101903-1a	500	150	75.4567	11.3185	74.421	11.1507	98.6274	98.5174	67.3293	10.0906	89.2292	89.151	1009425	743381378	786	376	176203	300	1393594	664917777	477.12	9393	102
YGE20	Soil	Jiangsu	Lianyungang	Guanyun	Daxing	2	119.24, 34.24	FDME220101921-1a	500	150	74.9633	11.2445	73.9059	11.0734	98.5895	98.4781	70.2715	10.53	93.7412	93.646	672696	384788978	583	351	19095	300	809681	339048720	418.74	7398	102
YGE21	Soil	Jiangsu	Lianyungang	Guanyun	Daxing	2	119.24, 34.24	FDME220101922-1a	500	150	89.7659	13.4649	88.5688	13.2718	98.6664	98.5661	83.5265	12.5174	93.0492	92.9631	706154	406308661	576	350	60440	300	865628	366534963	423.43	6933	102
YGE22	Soil	Jiangsu	Lianyungang	Guanyun	Daxing	2	119.24, 34.24	FDME220101923-1a	500	150	65.2975	9.79463	64.4362	9.65584	98.6809	98.583	60.4959	9.06621	92.6465	92.5631	467311	259462989	560	347	10453	300	569018	234035901	411.3	3981	102
YGE23	Soil	Jiangsu	Lianyungang	Guanyun	Daxing	2	119.24, 34.24	FDME220101924-1a	500	150	78.5975	11.7896	77.5578	11.6204	98.6771	98.5647	73.1584	10.9626	93.0797	92.9852	416478	215686174	529	341	5781	300	487104	194206422	398.7	3738	102
YGE24	Soil	Jiangsu	Lianyungang	Guanyun	Daxing	2	119.24, 34.24	FDME220101925-1a	500	150	68.9805	10.3471	67.9206	10.1769	98.4634	98.3552	64.7303	9.6997	93.8385	93.7433	469625	286014830	597	353	129177	300	590250	258548886	438.03	26889	102
YGE25	Soil	Jiangsu	Lianyungang	Guanyun	Daxing	2	119.24, 34.24	FDME220101926-1b	500	150	75.2661	11.2899	74.9814	11.2373	99.6218	99.5336	71.6653	10.7409	95.216	95.137	700346	433139723	627	360	534048	300	888997	392284152	441.27	6321	102
YGE26	Soil	Jiangsu	Lianyungang	Donghai	Miaohazhuang Village	60	118.32, 34.32	FDME220101927-1a	500	150	84.2164	12.6325	83.096	12.451	98.6696	98.5638	78.3632	11.743	93.0497	92.9589	758297	524784223	692	366	686395	300	1001490	469597815	468.9	45714	102
YGE27	Soil	Jiangsu	Lianyungang	Guanyun	Xiaoxizhuang Village	3	119.46,34.04	FDME220101928-1a	500	150	80.3482	12.0522	79.2889	11.881	98.6815	98.5789	75.017	11.2421	93.3648	93.2778	673538	383106744	576	349	114360	300	823240	345533613	419.72	9753	102
YGE28	Soil	Jiangsu	Lianyungang	Guanyun	Xiaoxizhuang Village	3	119.46,34.04	FDME220101929-1a	500	150	85.0554	12.7583	83.9355	12.5763	98.6832	98.5736	79.7561	11.9513	93.7695	93.6748	809293	500561821	626	358	173012	300	1022963	451079700	440.95	8628	102
YGE29	Soil	Jiangsu	Lianyungang	Guanyun	Xiaoxizhuang Village	3	119.46,34.04	FDME220101930-1a	500	150	66.9186	10.0378	66.0337	9.89533	98.6777	98.5808	62.5787	9.37823	93.5146	93.4292	394865	220896111	558	346	74222	300	476997	198359529	415.85	12129	102
YGE3	Soil	Jiangsu	Lianyungang	Guanyun	Xiaoxizhuang Village	3	119.46,34.04	FDME220101904-1a	500	150	92.6325	13.8949	91.4196	13.6992	98.6906	98.592	82.7102	12.3963	89.2885	89.2146	1187999	875980631	788	373	318573	300	1643016	783723261	477	9354	102
YGE30	Soil	Jiangsu	Lianyungang	Guanyun	Xiaoxizhuang Village	3	119.46,34.04	FDME220101931-1a	500	150	85.7236	12.8585	84.5727	12.6713	98.6575	98.544	79.8734	11.9688	93.1756	93.0807	656856	403766464	620	357	146395	300	816811	355889388	435.71	9483	102
YGE4	Soil	Jiangsu	Lianyungang	Guanyun	Xiaoxizhuang Village	3	119.46,34.04	FDME220101905-1a	500	150	75.656	11.3484	74.9565	11.2321	99.0753	98.9755	70.4599	10.5602	93.1319	93.0548	969374	756692295	858	379	315404	300	1377736	672671016	488.24	15078	102
YGE5	Soil	Jiangsu	Lianyungang	Guanyun	Xiaoxizhuang Village	3	119.46,34.04	FDME220101906-1a	500	150	70.8853	10.6328	70.1228	10.5076	98.9243	98.8221	66.3959	9.9498	93.6666	93.5765	740606	463074187	644	355	53255	300	953021	420669153	441.41	7968	102
YGE6	Soil	Jiangsu	Lianyungang	Guanyun	Xiaoxizhuang Village	3	119.46,34.04	FDME220101907-1a	500	150	94.7945	14.2192	93.7975	14.0605	98.9482	98.8841	89.0096	13.3437	93.8974	93.8432	887448	526647465	598	353	422777	300	1102573	477939774	433.48	7575	102
YGE7	Soil	Jiangsu	Lianyungang	Guanyun	Xiaoxizhuang Village	3	119.46,34.04	FDME220101908-1a	500	150	67.0969	10.0645	66.3279	9.94116	98.8539	98.7741	63.0709	9.45354	93.9996	93.9292	547997	336214926	618	357	207029	300	690481	304632924	441.19	8394	102
YGE8	Soil	Jiangsu	Lianyungang	Guanyun	Xiaoxizhuang Village	3	119.46,34.04	FDME220101909-1a	500	150	80.5641	12.0846	79.7209	11.9479	98.9534	98.8684	77.5167	11.6186	96.2174	96.1439	676479	428702769	653	358	628660	300	860233	385272180	447.87	11391	102
YGE9	Soil	Jiangsu	Lianyungang	Donghai	Miaohazhuang Village	60	118.32, 34.32	FDME220101910-1a	500	150	70.1285	10.5193	69.4665	10.4107	99.056	98.9682	66.0173	9.89433	94.1377	94.0591	715123	454545953	638	358	84315	300	918555	407382534	443.5	6309	102
YNE1	Soil	Yunnan	Kunming	Luquan	Lilao Village	2400	102.89,25.91	FDME220102106-1a	500	150	76.8794	11.5319	76.057	11.3991	98.9303	98.8483	73.5003	11.0165	95.6046	95.5308	815278	550624138	692	362	124858	300	1098718	504815478	459.46	27711	102
YNE10	Soil	Yunnan	Kunming	Luquan	Lilao Village	2400	102.89,25.91	FDME220102115-3a	500	150	103.955	15.5932	102.173	15.3088	98.286	98.1764	98.4266	14.7484	94.6824	94.5822	1150691	761540655	672	362	189623	300	1538350	692965887	450.46	14550	102
YNE11	Soil	Yunnan	Kunming	Guandu	Huazhuanghe Miao Village	2004	103.02,25.19	FDME220102116-1a	500	150	77.5315	11.6297	76.7326	11.4871	98.9696	98.7731	70.0627	10.4945	90.3667	90.2389	1024199	690832208	701	364	92307	300	1383518	625076706	451.8	11751	102
YNE14	Soil	Yunnan	Kunming	Guandu	Huazhuanghe Miao Village	2004	103.02,25.19	FDME220102119-1a	500	150	66.8093	10.0214	66.0846	9.90019	98.9154	98.7906	60.5313	9.06994	90.6032	90.5058	642024	428058055	669	363	188004	300	854571	391249557	457.83	15198	102
YNE15	Soil	Yunnan	Kunming	Guandu	Huazhuanghe Miao Village	2004	103.02,25.19	FDME220102120-2a	500	150	99.7253	14.9588	99.119	14.8366	99.3921	99.1828	92.2965	13.8232	92.5508	92.4089	791866	505462775	638	355	116324	300	1009727	439691355	435.46	12513	102
YNE16	Soil	Yunnan	Kunming	Guandu	Huazhuanghe Miao Village	2004	103.02,25.19	FDME220102121-1a	500	150	65.598	9.83971	64.9259	9.715	98.9754	98.7327	59.4942	8.90966	90.695	90.548	678875	473073949	722	365	126600	300	925349	422107317	456.16	11424	102
YNE17	Soil	Yunnan	Kunming	Guandu	Huazhuanghe Miao Village	2004	103.02,25.19	FDME220102122-2a	500	150	86.4649	12.9697	77.8277	11.6624	90.0108	89.9202	73.9067	11.0768	85.476	85.4047	886601	722276049	894	391	768723	300	1301999	651157704	500.12	14850	102
YNE18	Soil	Yunnan	Kunming	Guandu	Huazhuanghe Miao Village	2004	103.02,25.19	FDME220102123-1a	500	150	72.4807	10.8721	71.3262	10.6779	98.4072	98.2135	65.7819	9.85307	90.7578	90.6271	743649	557476669	777	373	263756	300	1053483	499149324	473.81	11835	102
YNE19	Soil	Yunnan	Kunming	Guandu	Huazhuanghe Miao Village	2004	103.02,25.19	FDME220102124-1a	500	150	76.1852	11.4278	75.1477	11.241	98.6382	98.3659	71.7363	10.7319	94.1604	93.9102	283815	181178564	624	352	157083	300	389034	163383879	419.97	17718	102
YNE2	Soil	Yunnan	Kunming	Luquan	Lilao Village	2400	102.89,25.91	FDME220102107-1a	500	150	65.4353	9.8153	64.7366	9.70077	98.9321	98.8331	61.7988	9.26097	94.4425	94.3524	829981	568836604	691	368	829011	300	1110557	516558747	465.13	35409	102
YNE20	Soil	Yunnan	Kunming	Guandu	Huazhuanghe Miao Village	2004	103.02,25.19	FDME220102125-1a	500	150	69.1834	10.3775	68.4599	10.2543	98.9543	98.8131	66.4897	9.95942	96.1064	95.9712	86470	63934120	759	355	120672	300	134211	54022020	402.52	12804	102
YNE21	Soil	Yunnan	Kunming	Luquan	Laozhuji Village	2280	102.83,25.98	FDME220102126-1a	500	150	112.575	16.8863	112.446	16.8231	99.8854	99.6257	103.7	15.5312	92.1161	91.9749	1444580	1181626258	911	387	834282	300	2141770	1058960631	494.43	19881	102
YNE22	Soil	Yunnan	Kunming	Luquan	Laozhuji Village	2280	102.83,25.98	FDME220102127-1a	500	150	66.2278	9.93417	65.4085	9.79322	98.763	98.5812	62.6484	9.38009	94.5953	94.4225	90821	63135842	704	356	132883	300	147982	56595033	382.45	11934	102
YNE23	Soil	Yunnan	Kunming	Luquan	Laozhuji Village	2280	102.83,25.98	FDME220102128-1a	500	150	72.1926	10.8289	72.1124	10.8009	99.8889	99.7416	69.679	10.4382	96.5182	96.3925	1008799	683492415	707	363	178317	300	1340925	619524096	462.01	30219	102
YNE24	Soil	Yunnan	Kunming	Luquan	Laozhuji Village	2280	102.83,25.98	FDME220102129-1a	500	150	66.3198	9.94797	65.1504	9.75593	98.2366	98.0696	61.2614	9.1741	92.3727	92.2208	85376	58303379	671	350	133576	300	133369	51785688	388.29	9813	102
YNE25	Soil	Yunnan	Kunming	Luquan	Laozhuji Village	2280	102.83,25.98	FDME220102130-1a	500	150	94.4867	14.173	94.3705	14.1391	99.877	99.7607	89.3688	13.3923	94.5834	94.4917	1217822	954749076	847	388	188693	300	1753998	868231545	495	14400	102
YNE26	Soil	Yunnan	Kunming	Luquan	Laozhuji Village	2280	102.83,25.98	FDME220102131-1a	500	150	67.4608	10.1191	66.9056	10.0261	99.1771	99.0803	62.0389	9.29786	91.963	91.8841	39932	24878293	612	342	56031	300	49532	20464335	413.15	4653	102
YNE27	Soil	Yunnan	Kunming	Luquan	Laozhuji Village	2280	102.83,25.98	FDME220102132-1a	500	150	68.1541	10.2231	67.6877	10.1443	99.3156	99.2291	65.5141	9.81891	96.1264	96.0461	64985	43260033	658	349	138487	300	102027	38738979	379.69	11427	102
YNE28	Soil	Yunnan	Kunming	Luquan	Laozhuji Village	2280	102.83,25.98	FDME220102133-1a	500	150	135.267	20.29	135.205	20.2655	99.9543	99.8796	127.199	19.0666	94.0361	93.9705	1872039	1266524502	693	366	139423	300	2514102	1157857653	460.55	33165	102
YNE29	Soil	Yunnan	Kunming	Luquan	Laozhuji Village	2280	102.83,25.98	FDME220102134-1a	500	150	88.5933	13.289	88.0524	13.1981	99.3895	99.3163	81.8663	12.2719	92.4069	92.3461	432924	208261202	467	332	134039	300	500812	188607867	376.6	8001	102
YNE3	Soil	Yunnan	Kunming	Luquan	Lilao Village	2400	102.89,25.91	FDME220102108-1a	500	150	80.431	12.0647	80.339	12.0441	99.8855	99.8293	77.5784	11.631	96.4533	96.4058	214409	151482039	747	361	55155	300	287223	130943856	455.9	8358	102
YNE30	Soil	Yunnan	Kunming	Luquan	Laozhuji Village	2280	102.83,25.98	FDME220102135-1a	500	150	71.7497	10.7625	71.4483	10.7089	99.5799	99.5022	66.8338	10.0183	93.1486	93.0855	147228	90273093	558	342	162005	300	207125	81206352	392.06	10569	102
YNE4	Soil	Yunnan	Kunming	Luquan	Lilao Village	2400	102.89,25.91	FDME220102109-1a	500	150	118.471	17.7706	118.351	17.7351	99.8986	99.8	117.47	17.6037	99.1555	99.0604	1610863	1147706076	762	364	233313	300	2228309	1045650201	469.26	27321	102
YNE5	Soil	Yunnan	Kunming	Luquan	Lilao Village	2400	102.89,25.91	FDME220102110-1a	500	150	95.0534	14.258	94.068	14.1013	98.9633	98.9006	89.6299	13.4367	94.2943	94.2393	1290380	910491848	734	369	148272	300	1770409	833058081	470.55	29511	102
YNE6	Soil	Yunnan	Kunming	Luquan	Lilao Village	2400	102.89,25.91	FDME220102111-1a	500	150	69.2654	10.3898	67.7879	10.1537	97.8669	97.7277	65.7128	9.84341	94.871	94.741	63776	35261724	548	340	51626	300	76546	29406834	384.17	5001	102
YNE7	Soil	Yunnan	Kunming	Luquan	Lilao Village	2400	102.89,25.91	FDME220102112-1a	500	150	70.0436	10.5065	69.303	10.3827	98.9426	98.8215	62.9094	9.42649	89.8146	89.7202	831647	530105021	642	360	372690	300	1080382	481518204	445.69	29844	102
YNE8	Soil	Yunnan	Kunming	Luquan	Lilao Village	2400	102.89,25.91	FDME220102113-1a	500	150	75.9901	11.3985	75.9263	11.3683	99.916	99.7349	70.4565	10.5537	92.718	92.5887	863815	632486394	773	374	324045	300	1188614	562196670	472.99	21213	102
YNE9	Soil	Yunnan	Kunming	Luquan	Lilao Village	2400	102.89,25.91	FDME220102114-1a	500	150	74.9087	11.2363	74.2177	11.113	99.0774	98.9026	69.3093	10.3824	92.525	92.4005	723443	490291552	705	366	88548	300	969239	433814397	447.58	14019	102
Note:
Sample: Sample name; Insert size: Insert fragment length; Read length: Sequence length of each read; Raw reads: Number of raw reads; Raw bases: Number of bases in raw reads.
Statistical tables for various quality control data. Sample: Sample name; Clean reads: Number of sequence reads in clean reads; Clean bases: Total sequence length of clean reads; Percent in raw reads: Percentage of clean reads in raw reads; Percent in raw bases: Percentage of clean bases in raw bases.
Sample: Sample name; Optimized reads: Number of optimized sequences after host removal; Optimized bases: Total sequence length of optimized reads; Percent in raw reads: Percentage of optimized reads in raw reads; Percent in raw bases: Percentage of optimized bases in raw bases.
