# Supplementary material for: Insights into antibiotic resistomes from metagenome-assembled genomes and gene catalogs of soil microbiota across environments
Source: PeerJ. 2025 Nov 19;13:e20348. doi: 10.7717/peerj.20348 (PMC12640132; doi:10.7717/peerj.20348)
Supplement: Supplemental Information 7 [file peerj-13-20348-s007.xlsx]

## Sheet: Binning result evaluation table
Table S2: Binning result evaluation table.
MAG Id	Taxonomy	Contigs Num	Genome size（bp）	Longest contig（bp）	N50 （contigs）（bp）	N90 （contigs）（bp）	Mean contig length（bp）	Completeness（%）	Contamination（%）
MAG309	d__Bacteria;p__Cyanobacteriota;c__Cyanobacteriia;o__Cyanobacteriales;f__Microcoleaceae;g__Microcoleus;s__Unclassified	3135	6122713	17548	2060	1184	223	81.64	5.38
MAG198	d__Bacteria;p__Pseudomonadota;c__Alphaproteobacteria;o__Rhizobiales;f__Xanthobacteraceae;g__Nitrobacter;s__Unclassified	3047	4256902	5633	1369	1062	174	58.62	9.55
MAG473	d__Bacteria;p__Cyanobacteriota;c__Cyanobacteriia;o__Cyanobacteriales;f__Nostocaceae;g__Scytonema;s__Unclassified	3046	6189419	9212	2119	1338	209	54.06	9.26
MAG8	d__Bacteria;p__Cyanobacteriota;c__Cyanobacteriia;o__Cyanobacteriales;f__Microcoleaceae;g__Microcoleus;s__Unclassified	3042	4272780	6655	1375	1056	209	56.07	6.49
MAG15	d__Bacteria;p__Cyanobacteriota;c__Cyanobacteriia;o__Cyanobacteriales;f__Coleofasciculaceae;g__Allocoleopsis;s__Unclassified	2943	4762836	7278	1620	1090	220	71.38	9.39
MAG595	d__Bacteria;p__Chloroflexota;c__Chloroflexia;o__Chloroflexales;f__Herpetosiphonaceae;g__LB3-1;s__Unclassified	2736	4217819	5847	1540	1078	232	52.26	4.86
MAG651	d__Bacteria;p__Pseudomonadota;c__Unclassified;o__Unclassified;f__Unclassified;g__Unclassified;s__Unclassified	2711	3531239	4464	1264	1042	190	57.15	9.99
MAG677	d__Bacteria;p__Acidobacteriota;c__Blastocatellia;o__Pyrinomonadales;f__Pyrinomonadaceae;g__JAFDVJ01;s__Unclassified	2701	3964834	5580	1448	1069	215	59.41	7.62
MAG95	d__Bacteria;p__Pseudomonadota;c__Gammaproteobacteria;o__Steroidobacterales;f__Steroidobacteraceae;g__13-2-20CM-66-19;s__Unclassified	2571	7545921	25670	3180	1828	250	58.61	5.66
MAG191	d__Bacteria;p__Tectomicrobia;c__Entotheonellia;o__Entotheonellales;f__Entotheonellaceae;g__SXND01;s__Unclassified	2561	5418990	11643	2272	1273	219	71.98	4.93
MAG557	d__Bacteria;p__Acidobacteriota;c__Blastocatellia;o__RBC074;f__RBC074;g__JAFDVL01;s__Unclassified	2506	3716198	7202	1445	1066	219	50.41	4.47
MAG972	d__Bacteria;p__Actinomycetota;c__Actinomycetia;o__Mycobacteriales;f__Micromonosporaceae;g__Unclassified;s__Unclassified	2504	4557302	9853	1908	1186	218	61.09	8.97
MAG37	d__Bacteria;p__Dormibacterota;c__Dormibacteria;o__CF-121;f__Unclassified;g__Unclassified;s__Unclassified	2493	4879743	7371	2065	1296	193	66.13	9.02
MAG207	d__Bacteria;p__Acidobacteriota;c__Blastocatellia;o__Pyrinomonadales;f__Pyrinomonadaceae;g__Unclassified;s__Unclassified	2473	3476930	5013	1382	1060	185	56.41	8.42
MAG543	d__Bacteria;p__Chloroflexota;c__Chloroflexia;o__Chloroflexales;f__Roseiflexaceae;g__JADKFS01;s__Unclassified	2470	4440900	8158	1856	1153	229	62.28	3.5
MAG629	d__Bacteria;p__Cyanobacteriota;c__Cyanobacteriia;o__Cyanobacteriales;f__Microcoleaceae;g__Microcoleus;s__Unclassified	2445	3736119	4965	1526	1088	218	57.47	3.29
MAG533	d__Bacteria;p__Acidobacteriota;c__Thermoanaerobaculia;o__UBA5704;f__UBA5704;g__UBA5704;s__Unclassified	2425	4844838	7487	2166	1206	263	72.73	5.85
MAG1095	d__Bacteria;p__Cyanobacteriota;c__Cyanobacteriia;o__Cyanobacteriales;f__Microcoleaceae;g__Microcoleus;s__Unclassified	2368	3512385	4610	1461	1077	220	57.35	5.54
MAG975	d__Bacteria;p__Actinomycetota;c__Actinomycetia;o__Mycobacteriales;f__Pseudonocardiaceae;g__Actinocrispum;s__Unclassified	2357	8309608	17689	4062	1956	272	64.15	5.23
MAG936	d__Bacteria;p__Acidobacteriota;c__Blastocatellia;o__Pyrinomonadales;f__Pyrinomonadaceae;g__PSRF01;s__Unclassified	2304	6141806	17584	3147	1375	270	89.09	3.7
MAG485	d__Bacteria;p__Acidobacteriota;c__Blastocatellia;o__Pyrinomonadales;f__Pyrinomonadaceae;g__PSRF01;s__Unclassified	2296	6905900	14505	3790	1474	285	90.74	7.79
MAG968	d__Bacteria;p__Armatimonadota;c__Fimbriimonadia;o__Fimbriimonadales;f__ATM1;g__Unclassified;s__Unclassified	2260	3093906	4244	1313	1050	180	52.22	6.01
MAG163	d__Bacteria;p__Chloroflexota;c__Chloroflexia;o__Thermomicrobiales;f__CADCWN01;g__CADCWN01;s__Unclassified	2253	3901875	6525	1770	1136	221	54.82	3.97
MAG495	d__Bacteria;p__Bacteroidota;c__Bacteroidia;o__Chitinophagales;f__Chitinophagaceae;g__JAEWAC01;s__Unclassified	2250	4067713	10548	1846	1119	224	64.04	7.44
MAG995	d__Bacteria;p__Chloroflexota;c__UBA6077;o__UBA6077;f__JADZDV01;g__Unclassified;s__Unclassified	2224	3983751	5885	1869	1152	225	60.54	6.69
MAG599	d__Bacteria;p__Cyanobacteriota;c__Cyanobacteriia;o__Cyanobacteriales;f__Microcoleaceae;g__Microcoleus;s__Unclassified	2194	4059417	10769	1939	1166	221	56.61	2.84
MAG1127	d__Bacteria;p__Pseudomonadota;c__Gammaproteobacteria;o__Burkholderiales;f__Burkholderiaceae;g__Telluria;s__Unclassified	2180	2814201	3553	1249	1034	199	61.18	9.98
MAG624	d__Bacteria;p__Acidobacteriota;c__Blastocatellia;o__Pyrinomonadales;f__Pyrinomonadaceae;g__PSRF01;s__Unclassified	2173	4399409	8925	2149	1243	247	61.1	3.43
MAG56	d__Bacteria;p__Nitrospirota;c__Nitrospiria;o__Nitrospirales;f__Nitrospiraceae;g__Nitrospira_F;s__Unclassified	2143	3289272	6698	1501	1078	190	65.48	9.93
MAG639	d__Archaea;p__Thermoproteota;c__Nitrososphaeria;o__Nitrososphaerales;f__Nitrososphaeraceae;g__Nitrososphaera;s__Unclassified	2088	3702756	8741	1815	1094	199	60.74	9.51
MAG932	d__Bacteria;p__Bacteroidota;c__Bacteroidia;o__Sphingobacteriales;f__Sphingobacteriaceae;g__Mucilaginibacter;s__Unclassified	2080	4401421	12718	2304	1176	254	88.33	4.46
MAG271	d__Bacteria;p__Myxococcota;c__Polyangia;o__Nannocystales;f__Nannocystaceae;g__Nannocystis;s__Unclassified	2074	5359270	13584	2643	1680	267	74.06	7.97
MAG250	d__Bacteria;p__Pseudomonadota;c__Alphaproteobacteria;o__ATCC43930;f__Stellaceae;g__Unclassified;s__Unclassified	2025	2792370	3336	1352	1054	208	52.99	9.89
MAG453	d__Bacteria;p__Bacteroidota;c__Bacteroidia;o__Chitinophagales;f__Chitinophagaceae;g__VBAS01;s__Unclassified	2021	2891107	5453	1404	1062	220	51.14	7.19
MAG737	d__Bacteria;p__Desulfobacterota_B;c__Binatia;o__UBA9968;f__UBA9968;g__WHTF01;s__Unclassified	2016	5067202	12577	2697	1529	235	83.87	6.3
MAG1023	d__Bacteria;p__Acidobacteriota;c__Thermoanaerobaculia;o__UBA5704;f__UBA5704;g__UBA5704;s__Unclassified	2015	7130304	65524	4531	1660	311	100	7.13
MAG399	d__Bacteria;p__Acidobacteriota;c__Blastocatellia;o__Pyrinomonadales;f__Pyrinomonadaceae;g__PSRF01;s__Unclassified	2005	3251183	7066	1612	1098	218	51.98	4.65
MAG102	d__Bacteria;p__Tectomicrobia;c__Entotheonellia;o__Entotheonellales;f__Entotheonellaceae;g__SXND01;s__Unclassified	1987	4854886	10120	2671	1481	229	67.44	6.47
MAG798	d__Bacteria;p__Nitrospirota;c__Nitrospiria;o__Nitrospirales;f__Nitrospiraceae;g__Unclassified;s__Unclassified	1982	2932961	4969	1453	1063	195	53.25	9.25
MAG387	d__Bacteria;p__Myxococcota;c__Polyangia;o__Nannocystales;f__Nannocystaceae;g__Nannocystis;s__Unclassified	1982	5644295	17293	3188	1617	271	63.07	1.19
MAG105	d__Bacteria;p__Cyanobacteriota;c__Cyanobacteriia;o__Cyanobacteriales;f__Microcoleaceae;g__Microcoleus;s__Microcoleus sp014695295	1974	2860520	5471	1430	1067	213	50.86	1.5
MAG423	d__Bacteria;p__Bacteroidota;c__Bacteroidia;o__Cytophagales;f__Cyclobacteriaceae;g__Chryseolinea;s__Unclassified	1972	4379591	9426	2341	1418	248	62.02	9.94
MAG444	d__Bacteria;p__Bacteroidota;c__Bacteroidia;o__Chitinophagales;f__Chitinophagaceae;g__Unclassified;s__Unclassified	1972	2964059	6951	1478	1072	224	56.09	7.59
MAG634	d__Bacteria;p__Bacteroidota;c__Bacteroidia;o__Chitinophagales;f__Chitinophagaceae;g__UBA3961;s__Unclassified	1964	3263384	6742	1659	1106	233	63.12	9.41
MAG618	d__Bacteria;p__Nitrospirota;c__Nitrospiria;o__Nitrospirales;f__Nitrospiraceae;g__Nitrospira_C;s__Unclassified	1957	2937412	7458	1450	1068	200	52.95	6.32
MAG257	d__Bacteria;p__Acidobacteriota;c__Thermoanaerobaculia;o__UBA5704;f__UBA5704;g__Unclassified;s__Unclassified	1951	6895946	15536	4057	1938	296	82.57	3
MAG7	d__Bacteria;p__Acidobacteriota;c__Blastocatellia;o__RBC074;f__RBC074;g__JACPYM01;s__Unclassified	1932	6282090	17975	3560	1972	288	70.37	1.15
MAG251	d__Bacteria;p__Bacteroidota;c__Bacteroidia;o__Chitinophagales;f__Chitinophagaceae;g__Hanamia;s__Unclassified	1923	2910409	5045	1483	1073	207	61.42	9.29
MAG933	d__Bacteria;p__Acidobacteriota;c__Thermoanaerobaculia;o__UBA5704;f__UBA5704;g__UBA5704;s__Unclassified	1922	5913284	11034	3388	1834	263	72.66	5.92
MAG277	d__Bacteria;p__Pseudomonadota;c__Alphaproteobacteria;o__Rhizobiales;f__Hyphomicrobiaceae;g__AWTP1-13;s__Unclassified	1914	4855079	11276	2558	1639	238	67.83	4.96
MAG529	d__Bacteria;p__Bacteroidota;c__Bacteroidia;o__Chitinophagales;f__Saprospiraceae;g__M3007;s__Unclassified	1901	3263013	9493	1751	1125	245	62.75	0.85
MAG342	d__Archaea;p__Thermoproteota;c__Nitrososphaeria;o__Nitrososphaerales;f__Nitrososphaeraceae;g__Nitrosocosmicus;s__Unclassified	1884	2367892	3956	1228	1040	170	64.96	8.05
MAG12	d__Bacteria;p__Acidobacteriota;c__Blastocatellia;o__Pyrinomonadales;f__Pyrinomonadaceae;g__QHXN01;s__Unclassified	1869	4066436	9634	2373	1308	271	50.76	6.07
MAG818	d__Bacteria;p__Chloroflexota;c__UBA5177;o__Unclassified;f__Unclassified;g__Unclassified;s__Unclassified	1859	3675496	9606	2113	1219	223	57.92	1.6
MAG52	d__Bacteria;p__Bacteroidota;c__Bacteroidia;o__Cytophagales;f__Cyclobacteriaceae;g__Chryseolinea;s__Unclassified	1852	2869089	6122	1544	1083	225	50.33	3.38
MAG585	d__Bacteria;p__Bacteroidota;c__Bacteroidia;o__Chitinophagales;f__Chitinophagaceae;g__Segetibacter;s__Unclassified	1847	2730998	5851	1458	1070	223	51.26	8.78
MAG441	d__Bacteria;p__Cyanobacteriota;c__Cyanobacteriia;o__Cyanobacteriales;f__Coleofasciculaceae;g__Allocoleopsis;s__Unclassified	1820	4764882	10086	2819	1615	236	62.17	3.6
MAG675	d__Bacteria;p__Acidobacteriota;c__Terriglobia;o__Bryobacterales;f__Bryobacteraceae;g__TMP-7;s__Unclassified	1817	3228960	7268	1826	1154	239	54.03	5.32
MAG956	d__Bacteria;p__Bacteroidota;c__Bacteroidia;o__Chitinophagales;f__Chitinophagaceae;g__Flavisolibacter;s__Unclassified	1791	3493413	9843	2055	1191	235	73.19	1.86
MAG894	d__Bacteria;p__Bacteroidota;c__Bacteroidia;o__Chitinophagales;f__Chitinophagaceae;g__Flavisolibacter;s__Unclassified	1786	2405128	4077	1294	1047	206	50.69	6.19
MAG802	d__Bacteria;p__Actinomycetota;c__Actinomycetia;o__Actinomycetales;f__Micrococcaceae;g__Arthrobacter;s__Arthrobacter equi	1782	3242011	7973	1866	1142	228	66.07	9.92
MAG1100	d__Bacteria;p__Pseudomonadota;c__Gammaproteobacteria;o__Xanthomonadales;f__Rhodanobacteraceae;g__Dyella;s__Unclassified	1773	3210660	5883	1878	1185	237	54.06	7.33
MAG940	d__Bacteria;p__Actinomycetota;c__Actinomycetia;o__Unclassified;f__Unclassified;g__Unclassified;s__Unclassified	1743	2214531	3755	1221	1031	216	58.5	9.11
MAG14	d__Bacteria;p__Myxococcota;c__Polyangia;o__Nannocystales;f__Nannocystaceae;g__Nannocystis;s__Unclassified	1729	4664917	16070	2775	1702	277	74.31	3.18
MAG656	d__Bacteria;p__Acidobacteriota;c__Thermoanaerobaculia;o__UBA5704;f__UBA5704;g__UBA5704;s__Unclassified	1714	6011424	16725	4010	1927	282	78.21	4.01
MAG857	d__Bacteria;p__Bacteroidota;c__Bacteroidia;o__Chitinophagales;f__Chitinophagaceae;g__Parasegetibacter;s__Unclassified	1705	2367515	3984	1350	1050	217	50.07	5.83
MAG144	d__Bacteria;p__Acidobacteriota;c__Blastocatellia;o__Pyrinomonadales;f__Pyrinomonadaceae;g__PSRF01;s__Unclassified	1704	3683573	8572	2414	1246	267	67.12	0.86
MAG728	d__Bacteria;p__Desulfobacterota_B;c__Binatia;o__UBA9968;f__UBA9968;g__DP-20;s__Unclassified	1703	2960163	5697	1784	1156	216	51.21	4.03
MAG524	d__Bacteria;p__Acidobacteriota;c__Blastocatellia;o__Pyrinomonadales;f__Pyrinomonadaceae;g__PSRF01;s__Unclassified	1696	2778624	6646	1657	1098	240	57.27	2.24
MAG969	d__Bacteria;p__Bacteroidota;c__Bacteroidia;o__Chitinophagales;f__Chitinophagaceae;g__Flaviaesturariibacter;s__Unclassified	1692	2527852	6623	1469	1065	230	65.03	9.35
MAG1077	d__Bacteria;p__Bacteroidota;c__Bacteroidia;o__Chitinophagales;f__Chitinophagaceae;g__Flavisolibacter;s__Unclassified	1691	3466777	8472	2218	1188	246	74.69	4.54
MAG589	d__Bacteria;p__Acidobacteriota;c__Vicinamibacteria;o__Vicinamibacterales;f__UBA2999;g__JAMQPK01;s__Unclassified	1690	5103134	13902	3232	1836	251	72.84	5.01
MAG528	d__Bacteria;p__Nitrospirota;c__Nitrospiria;o__Nitrospirales;f__Nitrospiraceae;g__Palsa-1315;s__Unclassified	1689	2304429	3994	1317	1043	179	55.51	9.55
MAG534	d__Bacteria;p__Acidobacteriota;c__HRBIN11;o__JAKEFK01;f__JAKEFK01;g__Unclassified;s__Unclassified	1678	3088933	7778	1928	1151	242	59.1	3.21
MAG115	d__Bacteria;p__Bacteroidota;c__Kapabacteria;o__OLB7;f__OLB7;g__JAFDZV01;s__Unclassified	1669	4956309	18145	3527	1572	276	89.05	3.7
MAG1096	d__Bacteria;p__Gemmatimonadota;c__Gemmatimonadetes;o__Gemmatimonadales;f__Gemmatimonadaceae;g__JADGGM01;s__Unclassified	1656	2552142	5620	1530	1087	224	51.19	9.65
MAG905	d__Bacteria;p__Gemmatimonadota;c__Gemmatimonadetes;o__Longimicrobiales;f__Longimicrobiaceae;g__Longimicrobium;s__Unclassified	1654	5062153	24649	3718	1598	264	96.88	4.33
MAG560	d__Bacteria;p__Bacteroidota;c__Bacteroidia;o__Chitinophagales;f__Saprospiraceae;g__JADKGY01;s__Unclassified	1654	2496536	5408	1460	1065	237	58.3	8.73
MAG1044	d__Bacteria;p__Pseudomonadota;c__Gammaproteobacteria;o__Burkholderiales;f__Burkholderiaceae_B;g__JAEUPI01;s__Unclassified	1652	2539813	5948	1520	1072	220	58.28	6.17
MAG561	d__Bacteria;p__Actinomycetota;c__Actinomycetia;o__Unclassified;f__Unclassified;g__Unclassified;s__Unclassified	1647	2159203	3513	1254	1041	206	58.57	8.7
MAG320	d__Bacteria;p__Acidobacteriota;c__Blastocatellia;o__Pyrinomonadales;f__Pyrinomonadaceae;g__Unclassified;s__Unclassified	1642	2742682	7630	1692	1116	229	53.04	0.71
MAG172	d__Bacteria;p__Acidobacteriota;c__Vicinamibacteria;o__Unclassified;f__Unclassified;g__Unclassified;s__Unclassified	1639	3205227	5115	1919	1560	243	51.8	9.74
MAG899	d__Bacteria;p__Bacteroidota;c__Bacteroidia;o__Cytophagales;f__Spirosomaceae;g__Spirosoma;s__Unclassified	1632	2956183	7136	1905	1148	224	65.58	1.81
MAG55	d__Bacteria;p__Nitrospirota;c__Nitrospiria;o__Nitrospirales;f__Nitrospiraceae;g__Unclassified;s__Unclassified	1621	2463078	5042	1485	1074	201	52.71	6.51
MAG350	d__Bacteria;p__Chloroflexota;c__Limnocylindria;o__QHBO01;f__Unclassified;g__Unclassified;s__Unclassified	1618	2668570	8116	1663	1088	222	50.11	8.23
MAG175	d__Bacteria;p__Cyanobacteriota;c__Cyanobacteriia;o__Cyanobacteriales;f__Coleofasciculaceae;g__Unclassified;s__Unclassified	1608	4726371	15659	3255	1817	250	58.23	3.26
MAG36	d__Bacteria;p__Chloroflexota;c__Ktedonobacteria;o__Ktedonobacterales;f__JADMIN01;g__JAKAIY01;s__Unclassified	1606	2840417	7713	1803	1151	221	51.02	2.03
MAG861	d__Bacteria;p__Tectomicrobia;c__Entotheonellia;o__Entotheonellales;f__Entotheonellaceae;g__SXND01;s__Unclassified	1604	5224204	16346	3551	1943	246	84.55	3.72
MAG178	d__Bacteria;p__Bacteroidota;c__Bacteroidia;o__Chitinophagales;f__Chitinophagaceae;g__Flavisolibacter;s__Unclassified	1598	2839313	8697	1838	1107	211	62.59	7.08
MAG957	d__Bacteria;p__Acidobacteriota;c__Blastocatellia;o__Pyrinomonadales;f__Pyrinomonadaceae;g__PSRF01;s__Unclassified	1597	6354624	28957	4734	2062	302	85.6	8.82
MAG954	d__Bacteria;p__Nitrospirota;c__Nitrospiria;o__Nitrospirales;f__Nitrospiraceae;g__Nitrospira_F;s__Unclassified	1594	2505763	6906	1563	1087	198	63.25	5.89
MAG1082	d__Bacteria;p__Acidobacteriota;c__Thermoanaerobaculia;o__UBA5704;f__UBA5704;g__UBA5704;s__Unclassified	1593	5989616	23959	4293	2016	303	80.25	2.66
MAG214	d__Bacteria;p__Acidobacteriota;c__Vicinamibacteria;o__Vicinamibacterales;f__UBA2999;g__12-FULL-67-14b;s__Unclassified	1593	3269148	6668	2142	1384	234	61.45	7.54
MAG430	d__Bacteria;p__Gemmatimonadota;c__Gemmatimonadetes;o__Gemmatimonadales;f__Gemmatimonadaceae;g__Gemmatirosa;s__Unclassified	1586	3615250	13157	2188	1601	274	64.12	9.92
MAG481	d__Bacteria;p__Bacteroidota;c__Bacteroidia;o__Cytophagales;f__Spirosomaceae;g__Spirosoma;s__Unclassified	1582	2774094	7649	1823	1153	222	56.66	2.48
MAG493	d__Bacteria;p__Acidobacteriota;c__Thermoanaerobaculia;o__UBA5704;f__UBA5704;g__Unclassified;s__Unclassified	1578	4391108	11531	2905	1751	266	71.95	3.84
MAG41	d__Bacteria;p__Pseudomonadota;c__Gammaproteobacteria;o__Pseudomonadales;f__Moraxellaceae;g__Acinetobacter;s__Acinetobacter bohemicus	1578	2634564	7677	1681	1109	205	74.42	6.88
MAG776	d__Bacteria;p__Fibrobacterota;c__Fibrobacteria;o__UBA11236;f__UBA11236;g__Chersky-265;s__Unclassified	1575	3009658	9540	2022	1167	239	57.37	1.42
MAG614	d__Bacteria;p__Acidobacteriota;c__Blastocatellia;o__RBC074;f__RBC074;g__Unclassified;s__Unclassified	1571	3519380	12589	2496	1296	259	61.45	2.59
MAG647	d__Bacteria;p__Acidobacteriota;c__Blastocatellia;o__Pyrinomonadales;f__Pyrinomonadaceae;g__PSRF01;s__Unclassified	1557	3953517	11192	2570	1709	269	67.36	2.46
MAG25	d__Bacteria;p__Pseudomonadota;c__Alphaproteobacteria;o__Sphingomonadales;f__Sphingomonadaceae;g__Unclassified;s__Unclassified	1555	1991304	3848	1248	1039	194	54.75	9.79
MAG467	d__Bacteria;p__Pseudomonadota;c__Gammaproteobacteria;o__Pseudomonadales;f__Pseudomonadaceae;g__Pseudomonas_E;s__Pseudomonas_E helleri	1548	2435209	5239	1581	1097	211	61.77	5.23
MAG454	d__Bacteria;p__Acidobacteriota;c__Blastocatellia;o__Pyrinomonadales;f__Pyrinomonadaceae;g__Unclassified;s__Unclassified	1543	3386009	11735	2456	1249	246	71.22	1.48
MAG962	d__Bacteria;p__Pseudomonadota;c__Alphaproteobacteria;o__Rhizobiales;f__Xanthobacteraceae;g__VAZQ01;s__Unclassified	1540	5834764	22234	4316	2031	257	71.19	5.35
MAG380	d__Archaea;p__Thermoproteota;c__Nitrososphaeria;o__Nitrososphaerales;f__Nitrososphaeraceae;g__Nitrosocosmicus;s__Nitrosocosmicus oleophilus	1533	2602960	9097	1703	1122	191	62	3.49
MAG192	d__Bacteria;p__Bacteroidota;c__Bacteroidia;o__Chitinophagales;f__Chitinophagaceae;g__Flavisolibacter;s__Unclassified	1529	2796576	8545	1859	1158	239	52.66	0.87
MAG908	d__Bacteria;p__Acidobacteriota;c__Blastocatellia;o__Pyrinomonadales;f__Pyrinomonadaceae;g__OLB17;s__Unclassified	1526	2838280	11990	1944	1132	243	59.69	6.04
MAG1062	d__Bacteria;p__Acidobacteriota;c__Blastocatellia;o__Pyrinomonadales;f__Pyrinomonadaceae;g__QHXN01;s__Unclassified	1520	3034377	8974	2118	1205	244	59.31	2.94
MAG1109	d__Bacteria;p__Pseudomonadota;c__Alphaproteobacteria;o__Sphingomonadales;f__Sphingomonadaceae;g__Sphingomonas_I;s__Unclassified	1515	4942354	18554	3526	1858	255	80.34	9.9
MAG141	d__Bacteria;p__Acidobacteriota;c__Vicinamibacteria;o__Vicinamibacterales;f__UBA2999;g__JACCSI01;s__Unclassified	1513	4030082	10821	2773	1694	262	55.62	6.49
MAG1022	d__Bacteria;p__Planctomycetota;c__Planctomycetia;o__Isosphaerales;f__Isosphaeraceae;g__Paludisphaera;s__Unclassified	1511	2607115	7357	1778	1127	239	51.64	3.23
MAG741	d__Bacteria;p__Chloroflexota;c__Ktedonobacteria;o__Ktedonobacterales;f__JADMIN01;g__JAKAIY01;s__Unclassified	1510	4432283	18606	3576	1516	253	82.69	3.1
MAG990	d__Bacteria;p__Nitrospirota;c__Nitrospiria;o__Nitrospirales;f__Nitrospiraceae;g__Nitrospira_F;s__Unclassified	1505	3310983	10529	2342	1304	208	52.44	4.77
MAG312	d__Bacteria;p__Cyanobacteriota;c__Cyanobacteriia;o__Cyanobacteriales;f__PCC-6304;g__Unclassified;s__Unclassified	1504	5207654	23169	4116	1821	276	81.26	2.55
MAG671	d__Bacteria;p__Acidobacteriota;c__Vicinamibacteria;o__Vicinamibacterales;f__UBA2999;g__12-FULL-67-14b;s__Unclassified	1498	3114722	8109	2283	1200	262	52.83	5.89
MAG210	d__Bacteria;p__Bacteroidota;c__Bacteroidia;o__Chitinophagales;f__Chitinophagaceae;g__Unclassified;s__Unclassified	1496	2103237	4746	1380	1054	209	55.57	7.33
MAG208	d__Bacteria;p__Bacteroidota;c__Bacteroidia;o__Chitinophagales;f__Chitinophagaceae;g__Flavitalea;s__Unclassified	1494	2634531	7489	1773	1134	240	59.08	3.78
MAG953	d__Bacteria;p__Deinococcota;c__Deinococci;o__Deinococcales;f__Deinococcaceae;g__Deinococcus;s__Unclassified	1485	2595663	8824	1779	1123	208	51.41	5.88
MAG289	d__Bacteria;p__Pseudomonadota;c__Gammaproteobacteria;o__Xanthomonadales;f__Rhodanobacteraceae;g__Tahibacter;s__Unclassified	1484	4026679	17860	3038	1489	272	73.43	0.61
MAG507	d__Bacteria;p__Pseudomonadota;c__Gammaproteobacteria;o__Enterobacterales;f__Enterobacteriaceae;g__Escherichia;s__Escherichia coli	1478	3367474	11612	2543	1301	235	66.82	5.35
MAG290	d__Bacteria;p__Actinomycetota;c__Actinomycetia;o__Actinomycetales;f__Dermatophilaceae;g__Lapillicoccus;s__Unclassified	1471	3339199	13394	2579	1229	235	58.74	7.62
MAG1084	d__Bacteria;p__Cyanobacteriota;c__Cyanobacteriia;o__Cyanobacteriales;f__Coleofasciculaceae;g__Unclassified;s__Unclassified	1468	3582052	8058	2459	1699	250	68.24	8.4
MAG726	d__Bacteria;p__Chloroflexota;c__Anaerolineae;o__Anaerolineales;f__EnvOPS12;g__UBA12294;s__Unclassified	1463	4239660	17314	3182	1738	249	76.3	9.34
MAG1128	d__Bacteria;p__Actinomycetota;c__Actinomycetia;o__Mycobacteriales;f__CADCTP01;g__CADCTP01;s__Unclassified	1462	4097787	13509	3193	1599	246	94.43	1.86
MAG103	d__Bacteria;p__Acidobacteriota;c__Blastocatellia;o__Pyrinomonadales;f__Pyrinomonadaceae;g__Unclassified;s__Unclassified	1452	4738878	24824	4081	1626	288	88.62	3.01
MAG59	d__Bacteria;p__Acidobacteriota;c__Blastocatellia;o__Pyrinomonadales;f__Pyrinomonadaceae;g__OLB17;s__Unclassified	1448	2662997	7228	1934	1131	221	67.07	8.86
MAG1119	d__Bacteria;p__Chloroflexota;c__Anaerolineae;o__Anaerolineales;f__EnvOPS12;g__UBA12294;s__Unclassified	1442	4388086	12662	3241	1828	255	70.52	8.68
MAG935	d__Bacteria;p__Gemmatimonadota;c__Gemmatimonadetes;o__Gemmatimonadales;f__GWC2-71-9;g__Palsa-1233;s__Unclassified	1442	2310022	5904	1591	1108	217	53.37	6.83
MAG567	d__Bacteria;p__Acidobacteriota;c__Blastocatellia;o__Pyrinomonadales;f__Pyrinomonadaceae;g__OLB17;s__Unclassified	1427	3115821	9784	2463	1212	231	75.14	7.15
MAG44	d__Bacteria;p__Acidobacteriota;c__Terriglobia;o__Bryobacterales;f__Bryobacteraceae;g__TMP-7;s__Unclassified	1424	4982903	60695	4646	1640	292	82.77	4.5
MAG461	d__Bacteria;p__Actinomycetota;c__Actinomycetia;o__Streptomycetales;f__Catenulisporaceae;g__Actinocrinis;s__Unclassified	1420	5762661	21475	4444	2410	277	69.45	9.39
MAG260	d__Bacteria;p__Pseudomonadota;c__Alphaproteobacteria;o__Acetobacterales;f__Acetobacteraceae;g__CADCTG01;s__Unclassified	1417	2693121	7116	1979	1197	215	61.85	1.91
MAG1054	d__Bacteria;p__Acidobacteriota;c__Thermoanaerobaculia;o__Gp7-AA8;f__Gp7-AA8;g__QHVT01;s__Unclassified	1411	3466520	9095	2493	1642	270	54.35	3.61
MAG766	d__Bacteria;p__Acidobacteriota;c__Blastocatellia;o__Pyrinomonadales;f__Pyrinomonadaceae;g__OLB17;s__Unclassified	1407	3390581	10713	2773	1321	259	65.69	4.03
MAG212	d__Bacteria;p__Actinomycetota;c__Actinomycetia;o__Actinomycetales;f__Micrococcaceae;g__Kocuria;s__Kocuria rosea	1402	2401651	6994	1732	1109	221	56.56	7.44
MAG858	d__Bacteria;p__Cyanobacteriota;c__Cyanobacteriia;o__Cyanobacteriales;f__Chroococcidiopsidaceae;g__Chroococcidiopsis;s__Unclassified	1399	3288014	7684	2542	1463	233	57.2	1.92
MAG291	d__Bacteria;p__Pseudomonadota;c__Gammaproteobacteria;o__Pseudomonadales;f__Cellvibrionaceae;g__Cellvibrio;s__Unclassified	1388	2299392	6263	1658	1106	223	54.2	9.08
MAG11	d__Bacteria;p__Planctomycetota;c__Planctomycetia;o__Planctomycetales;f__Planctomycetaceae;g__JACCRE01;s__Unclassified	1387	2297544	6863	1677	1112	229	50.47	4.51
MAG1081	d__Bacteria;p__Desulfobacterota_B;c__Binatia;o__UBA9968;f__UBA9968;g__DP-20;s__Unclassified	1386	4338890	19901	3330	1868	255	82.99	9.85
MAG591	d__Bacteria;p__Bacteroidota;c__Bacteroidia;o__Chitinophagales;f__Saprospiraceae;g__JADKGY01;s__Unclassified	1385	3289062	14291	2767	1254	299	82.71	7.42
MAG130	d__Bacteria;p__Pseudomonadota;c__Gammaproteobacteria;o__Burkholderiales;f__SG8-41;g__Unclassified;s__Unclassified	1374	2182561	6420	1584	1086	208	58.48	5.75
MAG965	d__Bacteria;p__Actinomycetota;c__Actinomycetia;o__Mycobacteriales;f__CADCTP01;g__CADCTP01;s__Unclassified	1373	4207537	13489	3311	1818	252	80.75	2.93
MAG613	d__Bacteria;p__Actinomycetota;c__Actinomycetia;o__Actinomycetales;f__Microbacteriaceae;g__Microbacterium;s__Unclassified	1372	1984869	4626	1425	1061	196	50.52	9.56
MAG359	d__Bacteria;p__Acidobacteriota;c__Thermoanaerobaculia;o__UBA5704;f__UBA5704;g__UBA5704;s__Unclassified	1372	4091403	12708	3261	1859	272	58.84	2.02
MAG310	d__Bacteria;p__Nitrospirota;c__Nitrospiria;o__Nitrospirales;f__Nitrospiraceae;g__Nitrospira_F;s__Unclassified	1358	1992395	4860	1451	1066	189	56.63	4.9
MAG821	d__Bacteria;p__Acidobacteriota;c__Blastocatellia;o__Pyrinomonadales;f__Pyrinomonadaceae;g__QHXN01;s__Unclassified	1346	5616406	19413	5344	2105	301	91.07	2
MAG23	d__Bacteria;p__Acidobacteriota;c__Vicinamibacteria;o__Vicinamibacterales;f__UBA2999;g__12-FULL-67-14b;s__Unclassified	1341	2906273	6666	2097	1593	247	68.57	9.29
MAG154	d__Bacteria;p__Pseudomonadota;c__Alphaproteobacteria;o__Rhizobiales;f__Xanthobacteraceae;g__Bradyrhizobium;s__Unclassified	1340	4095982	14701	3302	1863	237	62.52	8.35
MAG603	d__Bacteria;p__Cyanobacteriota;c__Cyanobacteriia;o__Cyanobacteriales;f__Microcoleaceae;g__Microcoleus;s__Unclassified	1336	5753843	18880	4857	2473	266	75.62	1.76
MAG1057	d__Bacteria;p__Actinomycetota;c__Actinomycetia;o__Jiangellales;f__Unclassified;g__Unclassified;s__Unclassified	1335	2892526	11904	2401	1178	237	59.03	6.46
MAG649	d__Bacteria;p__Cyanobacteriota;c__Cyanobacteriia;o__Cyanobacteriales;f__Phormidiaceae_A;g__Phormidium_B;s__Unclassified	1334	4205384	11328	3404	1845	264	68.65	3.09
MAG150	d__Bacteria;p__Pseudomonadota;c__Alphaproteobacteria;o__Rhodobacterales;f__Rhodobacteraceae;g__Paracoccus;s__Unclassified	1312	2209327	6851	1698	1103	204	65.6	7.51
MAG146	d__Bacteria;p__Pseudomonadota;c__Gammaproteobacteria;o__Pseudomonadales;f__Pseudomonadaceae;g__Thiopseudomonas;s__Unclassified	1308	2129565	8385	1652	1124	225	55.21	9.07
MAG98	d__Bacteria;p__Pseudomonadota;c__Gammaproteobacteria;o__Burkholderiales;f__Burkholderiaceae;g__Telluria;s__Unclassified	1306	2467972	8824	2008	1124	229	50.94	7.82
MAG403	d__Bacteria;p__Pseudomonadota;c__Alphaproteobacteria;o__Caulobacterales;f__Caulobacteraceae;g__Brevundimonas;s__Brevundimonas sp002979535	1306	2209028	6777	1717	1113	206	64.14	6.41
MAG658	d__Bacteria;p__Cyanobacteriota;c__Cyanobacteriia;o__Cyanobacteriales;f__Xenococcaceae;g__Waterburya;s__Unclassified	1300	5182587	30442	4766	2034	255	87.46	6.12
MAG128	d__Bacteria;p__Acidobacteriota;c__Thermoanaerobaculia;o__Gp7-AA8;f__Gp7-AA8;g__QHVT01;s__Unclassified	1294	5103655	24362	4622	2092	294	94.13	7.34
MAG401	d__Bacteria;p__Deinococcota;c__Deinococci;o__Deinococcales;f__Deinococcaceae;g__Deinococcus;s__Deinococcus radiopugnans	1293	3002843	11771	2523	1297	230	69.56	3.14
MAG135	d__Bacteria;p__Actinomycetota;c__Acidimicrobiia;o__UBA5794;f__ZC4RG35;g__Unclassified;s__Unclassified	1285	2360142	7114	1928	1176	221	63.17	6.7
MAG748	d__Bacteria;p__Bacteroidota;c__Bacteroidia;o__Chitinophagales;f__UBA10324;g__BJGO01;s__Unclassified	1282	2719226	8119	2377	1217	250	84.59	9.89
MAG76	d__Bacteria;p__Pseudomonadota;c__Gammaproteobacteria;o__Pseudomonadales;f__Pseudomonadaceae;g__Pseudomonas_E;s__Unclassified	1279	5020027	45285	5835	1622	277	72.32	4.56
MAG267	d__Bacteria;p__Actinomycetota;c__Actinomycetia;o__Actinomycetales;f__Micrococcaceae;g__Kocuria;s__Unclassified	1277	2090506	6988	1618	1083	221	55.57	4.19
MAG760	d__Bacteria;p__Acidobacteriota;c__Vicinamibacteria;o__Vicinamibacterales;f__2-12-FULL-66-21;g__JACCXG01;s__Unclassified	1275	3853372	18103	3287	1815	286	65.42	3.71
MAG541	d__Bacteria;p__Pseudomonadota;c__Alphaproteobacteria;o__Rhodobacterales;f__Rhodobacteraceae;g__Paracoccus;s__Unclassified	1273	1934332	5701	1508	1084	208	52.43	7.27
MAG361	d__Archaea;p__Thermoproteota;c__Nitrososphaeria;o__Nitrososphaerales;f__Nitrososphaeraceae;g__Nitrosocosmicus;s__Unclassified	1265	2486772	15766	2021	1189	184	63.31	2.92
MAG974	d__Bacteria;p__Pseudomonadota;c__Gammaproteobacteria;o__Steroidobacterales;f__Steroidobacteraceae;g__CADEED01;s__Unclassified	1262	2690073	8423	2276	1331	245	52.32	7.8
MAG967	d__Bacteria;p__Actinomycetota;c__Actinomycetia;o__Streptomycetales;f__Streptomycetaceae;g__Streptomyces;s__Unclassified	1255	3955310	16999	3438	1835	251	60.67	4.99
MAG1063	d__Bacteria;p__Bacteroidota;c__Bacteroidia;o__Sphingobacteriales;f__Sphingobacteriaceae;g__Sphingobacterium;s__Unclassified	1252	2823827	10140	2418	1325	271	56.88	9.75
MAG610	d__Bacteria;p__Chloroflexota;c__Chloroflexia;o__Thermomicrobiales;f__UBA6265;g__UBA6265;s__Unclassified	1248	2716301	12463	2400	1209	234	66.12	6.69
MAG583	d__Bacteria;p__Bacteroidota;c__Bacteroidia;o__Chitinophagales;f__Chitinophagaceae;g__JAEWAC01;s__Unclassified	1246	2247599	7519	1852	1150	234	57.48	2.55
MAG934	d__Bacteria;p__Pseudomonadota;c__Alphaproteobacteria;o__Rhizobiales;f__Xanthobacteraceae;g__PALSA-894;s__Unclassified	1245	3596567	18378	3579	1420	250	73.21	1.21
MAG77	d__Bacteria;p__Gemmatimonadota;c__Gemmatimonadetes;o__Gemmatimonadales;f__Gemmatimonadaceae;g__UBA4720;s__Unclassified	1245	2891251	17205	2585	1320	251	68.95	4.34
MAG758	d__Bacteria;p__Bacteroidota;c__Bacteroidia;o__Flavobacteriales;f__Weeksellaceae;g__MFBS3-17;s__Unclassified	1244	2486312	13592	2091	1182	241	51.08	7.92
MAG406	d__Bacteria;p__Nitrospirota;c__Nitrospiria;o__Nitrospirales;f__Nitrospiraceae;g__Nitrospira_F;s__Unclassified	1243	2495982	9167	2148	1186	222	56.29	3.87
MAG395	d__Bacteria;p__Gemmatimonadota;c__Gemmatimonadetes;o__Gemmatimonadales;f__GWC2-71-9;g__Unclassified;s__Unclassified	1231	2195042	7625	1841	1133	227	58.23	7.86
MAG1045	d__Bacteria;p__Actinomycetota;c__Actinomycetia;o__Actinomycetales;f__Dermatophilaceae;g__Pedococcus;s__Unclassified	1229	2645511	10787	2364	1190	227	52.4	8.31
MAG914	d__Bacteria;p__Pseudomonadota;c__Gammaproteobacteria;o__Pseudomonadales;f__Cellvibrionaceae;g__Cellvibrio;s__Unclassified	1223	1938306	6509	1563	1094	218	51.15	5.9
MAG75	d__Bacteria;p__Desulfobacterota_B;c__Binatia;o__UBA9968;f__UBA9968;g__DP-20;s__Unclassified	1221	2968324	10162	2455	1664	238	56.07	3.96
MAG283	d__Bacteria;p__Bacteroidota;c__Bacteroidia;o__Chitinophagales;f__Chitinophagaceae;g__JAEWAC01;s__Unclassified	1218	2317504	9169	2032	1190	245	53.65	0.04
MAG593	d__Bacteria;p__Pseudomonadota;c__Alphaproteobacteria;o__Rhizobiales;f__Xanthobacteraceae;g__Pseudolabrys;s__Unclassified	1217	2268286	8475	1989	1152	227	50.15	8.46
MAG468	d__Bacteria;p__Acidobacteriota;c__Blastocatellia;o__Pyrinomonadales;f__Pyrinomonadaceae;g__OLB17;s__Unclassified	1216	2044294	6033	1708	1115	228	50.33	3.14
MAG586	d__Bacteria;p__Acidobacteriota;c__Terriglobia;o__Bryobacterales;f__Bryobacteraceae;g__Bog-105;s__Unclassified	1215	2240240	5848	1939	1199	232	51.02	1.95
MAG234	d__Bacteria;p__Acidobacteriota;c__Terriglobia;o__Bryobacterales;f__Bryobacteraceae;g__Bog-105;s__Unclassified	1215	3402779	12834	3183	1592	265	63.55	1.72
MAG221	d__Bacteria;p__Gemmatimonadota;c__Gemmatimonadetes;o__Longimicrobiales;f__RSA9;g__Unclassified;s__Unclassified	1209	2727605	15051	2627	1198	237	78.17	6.63
MAG280	d__Bacteria;p__Pseudomonadota;c__Gammaproteobacteria;o__Burkholderiales;f__Burkholderiaceae_B;g__Rhizobacter;s__Unclassified	1209	3063255	9120	2771	1520	229	52.22	6.29
MAG386	d__Bacteria;p__Actinomycetota;c__Actinomycetia;o__Mycobacteriales;f__CADCTP01;g__CADCTP01;s__Unclassified	1208	3420876	9623	2939	1919	238	63.41	5.6
MAG788	d__Bacteria;p__Pseudomonadota;c__Gammaproteobacteria;o__Burkholderiales;f__Burkholderiaceae_B;g__Rubrivivax_A;s__Unclassified	1203	2233564	9825	1937	1199	236	57.53	7.26
MAG518	d__Archaea;p__Thermoproteota;c__Nitrososphaeria;o__Nitrososphaerales;f__Nitrososphaeraceae;g__Nitrosocosmicus;s__Nitrosocosmicus oleophilus	1202	2249529	8817	1930	1148	188	65.45	1.02
MAG706	d__Bacteria;p__Bacteroidota;c__Bacteroidia;o__Chitinophagales;f__Chitinophagaceae;g__Unclassified;s__Unclassified	1201	2066209	8294	1763	1127	234	57.13	1.54
MAG711	d__Bacteria;p__Pseudomonadota;c__Gammaproteobacteria;o__Burkholderiales;f__Burkholderiaceae_C;g__Advenella;s__Unclassified	1200	2349311	6749	2083	1202	224	54.59	1.02
MAG482	d__Bacteria;p__Acidobacteriota;c__Blastocatellia;o__Pyrinomonadales;f__Pyrinomonadaceae;g__QHXN01;s__Unclassified	1184	3485070	17901	3781	1442	273	72.3	5.09
MAG831	d__Bacteria;p__Bacteroidota;c__Bacteroidia;o__Chitinophagales;f__Chitinophagaceae;g__VBAS01;s__Unclassified	1183	3568758	13400	3240	1785	276	76.45	4.62
MAG878	d__Bacteria;p__Pseudomonadota;c__Alphaproteobacteria;o__Rhodobacterales;f__Rhodobacteraceae;g__Paracoccus;s__Unclassified	1182	2306849	11577	2048	1176	223	56.42	7.83
MAG983	d__Bacteria;p__Bacteroidota;c__Bacteroidia;o__Chitinophagales;f__Chitinophagaceae;g__Ferruginibacter;s__Unclassified	1181	2622501	7115	2189	1611	244	50.89	5.31
MAG360	d__Bacteria;p__Chloroflexota;c__Ktedonobacteria;o__Ktedonobacterales;f__JADMIN01;g__JAKAIY01;s__Unclassified	1178	3657545	14084	3430	1799	260	74.52	3.55
MAG82	d__Bacteria;p__Actinomycetota;c__Actinomycetia;o__Actinomycetales;f__Micrococcaceae;g__Arthrobacter;s__Arthrobacter oxydans	1177	3227570	22096	3164	1479	250	76.73	2.33
MAG738	d__Bacteria;p__Bacteroidota;c__Bacteroidia;o__Sphingobacteriales;f__Sphingobacteriaceae;g__Arcticibacter;s__Arcticibacter pallidicorallinus	1174	2644682	14237	2500	1244	255	51.72	6.44
MAG799	d__Bacteria;p__Pseudomonadota;c__Alphaproteobacteria;o__Rhizobiales;f__Xanthobacteraceae;g__PALSA-894;s__Unclassified	1172	3666833	18532	3472	1892	246	65.76	1.59
MAG333	d__Bacteria;p__Bacteroidota;c__Bacteroidia;o__Chitinophagales;f__Chitinophagaceae;g__Ferruginibacter;s__Unclassified	1171	3385089	28595	3205	1626	268	73.53	2.37
MAG622	d__Bacteria;p__Acidobacteriota;c__Vicinamibacteria;o__Vicinamibacterales;f__UBA2999;g__12-FULL-67-14b;s__Unclassified	1167	4930457	24611	5948	1900	303	88.91	5.12
MAG67	d__Bacteria;p__Gemmatimonadota;c__Gemmatimonadetes;o__Gemmatimonadales;f__Gemmatimonadaceae;g__Fen-1247;s__Unclassified	1164	2703897	11934	2616	1286	252	59.89	5.64
MAG833	d__Bacteria;p__Gemmatimonadota;c__Gemmatimonadetes;o__Gemmatimonadales;f__Gemmatimonadaceae;g__JADGGM01;s__Unclassified	1153	3278061	21208	3283	1551	265	72.12	4.02
MAG438	d__Bacteria;p__Cyanobacteriota;c__Cyanobacteriia;o__Leptolyngbyales;f__Leptolyngbyaceae;g__DSRU01;s__DSRU01 sp015296075	1152	4899798	25955	4870	2370	279	80.46	1.57
MAG616	d__Bacteria;p__Pseudomonadota;c__Gammaproteobacteria;o__Burkholderiales;f__Burkholderiaceae_B;g__Giesbergeria;s__Unclassified	1149	2302480	11209	2108	1207	232	70.25	4.27
MAG1122	d__Bacteria;p__Bacteroidota;c__Bacteroidia;o__Flavobacteriales;f__PHOS-HE28;g__PHOS-HE28;s__Unclassified	1138	2027530	6474	1838	1131	235	66.57	0.26
MAG427	d__Bacteria;p__Actinomycetota;c__Thermoleophilia;o__Solirubrobacterales;f__Solirubrobacteraceae;g__Unclassified;s__Unclassified	1135	3571356	17829	3399	1785	242	52.99	7.83
MAG952	d__Bacteria;p__Pseudomonadota;c__Alphaproteobacteria;o__Rhodobacterales;f__Rhodobacteraceae;g__Paracoccus;s__Paracoccus sp021491915	1132	1944805	5399	1784	1132	215	58.87	3.44
MAG185	d__Bacteria;p__Pseudomonadota;c__Gammaproteobacteria;o__Burkholderiales;f__Burkholderiaceae_B;g__Ramlibacter;s__Unclassified	1122	2614196	13635	2627	1256	234	60.65	3.02
MAG370	d__Bacteria;p__Actinomycetota;c__Actinomycetia;o__Actinomycetales;f__Micrococcaceae;g__Kocuria;s__Unclassified	1122	1758287	5956	1548	1082	220	51	1.6
MAG626	d__Bacteria;p__Pseudomonadota;c__Gammaproteobacteria;o__Burkholderiales;f__Burkholderiaceae_B;g__Comamonas;s__Comamonas sp015478895	1121	2023020	7503	1831	1138	216	58.43	5.79
MAG1034	d__Bacteria;p__Gemmatimonadota;c__Gemmatimonadetes;o__Gemmatimonadales;f__Gemmatimonadaceae;g__UBA4720;s__Unclassified	1120	2336928	13600	2220	1239	240	58.65	3.81
MAG693	d__Bacteria;p__Actinomycetota;c__Actinomycetia;o__Unclassified;f__Unclassified;g__Unclassified;s__Unclassified	1119	2099225	5747	1824	1542	228	53.5	9.79
MAG91	d__Bacteria;p__Pseudomonadota;c__Gammaproteobacteria;o__Steroidobacterales;f__Steroidobacteraceae;g__Povalibacter;s__Unclassified	1112	3204535	12211	3205	1690	260	78.29	1.83
MAG273	d__Bacteria;p__Pseudomonadota;c__Alphaproteobacteria;o__Rhodobacterales;f__Rhodobacteraceae;g__Paracoccus;s__Paracoccus sp021491915	1112	2004237	7849	1862	1146	216	73.15	4.03
MAG1091	d__Bacteria;p__Armatimonadota;c__Fimbriimonadia;o__Fimbriimonadales;f__Fimbriimonadaceae;g__Unclassified;s__Unclassified	1107	4487691	31404	6528	1588	258	87.49	2.02
MAG62	d__Bacteria;p__Actinomycetota;c__Actinomycetia;o__Actinomycetales;f__Micrococcaceae;g__Glutamicibacter;s__Glutamicibacter sp004320535	1099	3445067	15463	3524	1740	246	77.44	6.98
MAG378	d__Bacteria;p__Acidobacteriota;c__Blastocatellia;o__Pyrinomonadales;f__Pyrinomonadaceae;g__Unclassified;s__Unclassified	1098	3147570	21512	3483	1445	269	82.18	3.56
MAG712	d__Bacteria;p__Gemmatimonadota;c__Gemmatimonadetes;o__Longimicrobiales;f__Longimicrobiaceae;g__Longimicrobium;s__Unclassified	1097	4596861	25102	5011	2201	284	92.97	0.91
MAG457	d__Bacteria;p__Actinomycetota;c__Thermoleophilia;o__Gaiellales;f__Gaiellaceae;g__Gaiella;s__Unclassified	1097	2609878	19195	2714	1286	230	67.9	2.05
MAG42	d__Bacteria;p__Chloroflexota;c__UBA6077;o__UBA6077;f__CF-72;g__Unclassified;s__Unclassified	1097	3742874	18415	3711	1952	267	72.62	1.25
MAG336	d__Bacteria;p__Acidobacteriota;c__Vicinamibacteria;o__Vicinamibacterales;f__UBA2999;g__JACCSI01;s__Unclassified	1096	3824202	20827	3898	1993	278	59.71	5.07
MAG699	d__Bacteria;p__Pseudomonadota;c__Gammaproteobacteria;o__Burkholderiales;f__Burkholderiaceae;g__Telluria;s__Unclassified	1094	4788388	85366	5236	2189	283	79.06	4.3
MAG575	d__Bacteria;p__Actinomycetota;c__Actinomycetia;o__Mycobacteriales;f__Micromonosporaceae;g__Rhizocola;s__Unclassified	1093	5842859	41392	6864	2627	294	93.31	2.01
MAG1049	d__Bacteria;p__Actinomycetota;c__Acidimicrobiia;o__Acidimicrobiales;f__JADJXE01;g__Unclassified;s__Unclassified	1093	2771658	11919	2906	1387	242	73.82	3.26
MAG981	d__Bacteria;p__Bacteroidota;c__Bacteroidia;o__Chitinophagales;f__Chitinophagaceae;g__Hanamia;s__Unclassified	1088	3433412	13502	3442	1826	265	77.51	5.08
MAG984	d__Bacteria;p__Pseudomonadota;c__Alphaproteobacteria;o__Rhodobacterales;f__Rhodobacteraceae;g__Amaricoccus;s__Unclassified	1086	3524706	21625	3590	1813	244	75.81	4.53
MAG721	d__Bacteria;p__Armatimonadota;c__Fimbriimonadia;o__Fimbriimonadales;f__Fimbriimonadaceae;g__55-13;s__55-13 sp023423495	1083	2703852	16122	2886	1311	239	79.5	7.87
MAG1051	d__Bacteria;p__Pseudomonadota;c__Alphaproteobacteria;o__Rhodobacterales;f__Rhodobacteraceae;g__Paracoccus;s__Unclassified	1073	1875221	6695	1792	1121	212	56.09	3.32
MAG180	d__Bacteria;p__Dormibacterota;c__Dormibacteria;o__Dormibacterales;f__Dormibacteraceae;g__40CM-4-65-16;s__Unclassified	1070	3559112	14916	3776	1835	233	75.3	9.41
MAG365	d__Bacteria;p__Actinomycetota;c__Actinomycetia;o__Streptosporangiales;f__Streptosporangiaceae;g__Nocardiopsis;s__Unclassified	1066	5250745	52322	6021	2535	271	80.86	4.24
MAG469	d__Bacteria;p__Bacteroidota;c__Bacteroidia;o__Chitinophagales;f__Chitinophagaceae;g__JADCRZ01;s__Unclassified	1066	3252891	10637	3246	1921	283	58.23	2.49
MAG725	d__Bacteria;p__Acidobacteriota;c__Terriglobia;o__Terriglobales;f__Acidobacteriaceae;g__Palsa-343;s__Unclassified	1066	3816056	15586	3904	2065	281	68.09	1.33
MAG324	d__Bacteria;p__Pseudomonadota;c__Gammaproteobacteria;o__Pseudomonadales;f__Cellvibrionaceae;g__Cellvibrio;s__Unclassified	1062	2343788	38606	2286	1192	262	50.87	5.86
MAG564	d__Bacteria;p__Acidobacteriota;c__Terriglobia;o__Bryobacterales;f__Bryobacteraceae;g__Bog-105;s__Unclassified	1061	2437472	19688	2591	1270	244	58.44	5.92
MAG133	d__Bacteria;p__Pseudomonadota;c__Gammaproteobacteria;o__Burkholderiales;f__Burkholderiaceae_B;g__Ramlibacter;s__Unclassified	1058	2319907	8581	2356	1352	226	50.78	2.26
MAG148	d__Bacteria;p__Pseudomonadota;c__Alphaproteobacteria;o__Acetobacterales;f__Acetobacteraceae;g__Unclassified;s__Unclassified	1057	4450305	20395	5130	2064	262	83.35	3.48
MAG292	d__Bacteria;p__Pseudomonadota;c__Alphaproteobacteria;o__Rhodobacterales;f__Rhodobacteraceae;g__Paracoccus;s__Paracoccus sp021491915	1054	2618206	9250	2842	1354	234	84.29	1.77
MAG1002	d__Bacteria;p__Bacillota;c__Bacilli;o__Staphylococcales;f__Staphylococcaceae;g__Mammaliicoccus;s__Mammaliicoccus sciuri	1053	1480207	4180	1347	1056	195	54.47	6.62
MAG910	d__Bacteria;p__Myxococcota;c__Myxococcia;o__Myxococcales;f__Myxococcaceae;g__Unclassified;s__Unclassified	1048	3629662	16606	3821	1925	270	84.27	3.71
MAG233	d__Archaea;p__Thermoproteota;c__Nitrososphaeria;o__Nitrososphaerales;f__Nitrososphaeraceae;g__Nitrosocosmicus;s__Nitrosocosmicus oleophilus	1047	1632276	6344	1551	1073	177	51.94	3.22
MAG1113	d__Bacteria;p__Chloroflexota;c__Anaerolineae;o__Anaerolineales;f__EnvOPS12;g__UBA12294;s__Unclassified	1046	2597852	15647	2902	1316	247	67.82	6.22
MAG1043	d__Bacteria;p__Actinomycetota;c__Acidimicrobiia;o__Acidimicrobiales;f__AC-14;g__CADCTB01;s__Unclassified	1046	2965844	16200	3333	1462	242	70.41	3.03
MAG631	d__Bacteria;p__Sumerlaeota;c__Sumerlaeia;o__Sumerlaeales;f__Sumerlaeaceae;g__Unclassified;s__Unclassified	1045	1843850	7273	1789	1133	233	52.22	2.61
MAG109	d__Bacteria;p__Gemmatimonadota;c__Gemmatimonadetes;o__Gemmatimonadales;f__Gemmatimonadaceae;g__JABFXC01;s__Unclassified	1045	2266711	6226	2127	1610	253	52.31	9.86
MAG419	d__Bacteria;p__Cyanobacteriota;c__Cyanobacteriia;o__Cyanobacteriales;f__Chroococcidiopsidaceae;g__Chroococcidiopsis;s__Chroococcidiopsis thermalis	1038	5886466	33765	6796	3074	274	85.43	2.78
MAG612	d__Archaea;p__Thermoproteota;c__Nitrososphaeria;o__Nitrososphaerales;f__Nitrososphaeraceae;g__Nitrosocosmicus;s__Unclassified	1035	1699836	7384	1655	1091	177	57.19	4.49
MAG231	d__Bacteria;p__Bacteroidota;c__Bacteroidia;o__Chitinophagales;f__Chitinophagaceae;g__JAEZDC01;s__Unclassified	1030	2888509	11509	3225	1596	258	77.23	3.88
MAG476	d__Bacteria;p__Actinomycetota;c__Actinomycetia;o__Actinomycetales;f__Dermatophilaceae;g__Ornithinicoccus;s__Ornithinicoccus ciconiae	1029	3824539	17776	4171	1957	270	76.15	8.06
MAG332	d__Bacteria;p__Pseudomonadota;c__Alphaproteobacteria;o__Rhodobacterales;f__Rhodobacteraceae;g__Paracoccus;s__Paracoccus sp021491915	1025	2992896	14470	3445	1518	246	84.7	2.42
MAG1066	d__Bacteria;p__Pseudomonadota;c__Alphaproteobacteria;o__Reyranellales;f__Unclassified;g__Unclassified;s__Unclassified	1022	2157252	9700	2361	1196	232	53.74	2.57
MAG112	d__Bacteria;p__Deinococcota;c__Deinococci;o__Deinococcales;f__Deinococcaceae;g__Deinococcus;s__Unclassified	1020	1713157	6042	1694	1119	212	50.5	2.15
MAG830	d__Bacteria;p__Acidobacteriota;c__Thermoanaerobaculia;o__Gp7-AA8;f__Gp7-AA8;g__QHVT01;s__Unclassified	1017	4909602	24771	5979	2433	310	96.33	3.55
MAG149	d__Bacteria;p__Actinomycetota;c__Actinomycetia;o__Propionibacteriales;f__Nocardioidaceae;g__Nocardioides;s__Unclassified	1014	2980586	8712	3080	1956	240	50.35	9.06
MAG173	d__Bacteria;p__Chloroflexota;c__Anaerolineae;o__Anaerolineales;f__EnvOPS12;g__UBA12294;s__Unclassified	1012	3491612	17175	3847	2034	258	59.86	4.68
MAG843	d__Bacteria;p__Pseudomonadota;c__Alphaproteobacteria;o__Acetobacterales;f__Acetobacteraceae;g__Unclassified;s__Unclassified	1010	3507279	18591	3799	1982	254	77.44	2.56
MAG789	d__Bacteria;p__Chloroflexota;c__Ktedonobacteria;o__Ktedonobacterales;f__JADMIN01;g__JAKAIY01;s__Unclassified	1009	4309250	22930	5150	2267	276	81.47	1.76
MAG827	d__Bacteria;p__Armatimonadota;c__DTGP01;o__Unclassified;f__Unclassified;g__Unclassified;s__Unclassified	1007	3209192	15419	4019	1579	274	83.18	2.03
MAG669	d__Bacteria;p__Bacteroidota;c__Bacteroidia;o__Flavobacteriales;f__Flavobacteriaceae;g__Flavobacterium;s__Unclassified	1007	2110049	12259	2258	1187	232	65.61	7.96
MAG156	d__Bacteria;p__Actinomycetota;c__Actinomycetia;o__Streptomycetales;f__Streptomycetaceae;g__Streptomyces;s__Unclassified	1004	4914102	30479	6062	2476	301	85.88	4.66
MAG542	d__Bacteria;p__Pseudomonadota;c__Gammaproteobacteria;o__Burkholderiales;f__Burkholderiaceae_C;g__Paenalcaligenes;s__Unclassified	1001	2311909	16202	2573	1234	239	73.96	6.02
MAG319	d__Bacteria;p__Actinomycetota;c__Acidimicrobiia;o__Acidimicrobiales;f__Ilumatobacteraceae;g__JACCUL01;s__Unclassified	989	2838042	10834	3049	1757	257	60.43	3.31
MAG1118	d__Bacteria;p__Chloroflexota;c__Chloroflexia;o__Thermomicrobiales;f__UBA6265;g__JAMLHN01;s__Unclassified	983	2288066	8976	2325	1618	238	50.05	2.44
MAG958	d__Bacteria;p__Pseudomonadota;c__Alphaproteobacteria;o__Rhodobacterales;f__Rhodobacteraceae;g__Rubellimicrobium;s__Unclassified	979	2851326	18257	3078	1754	239	66.64	3.8
MAG757	d__Bacteria;p__Chloroflexota;c__Limnocylindria;o__Limnocylindrales;f__CSP1-4;g__SPCO01;s__Unclassified	979	2527200	50831	2926	1356	242	54.21	6.28
MAG282	d__Bacteria;p__Pseudomonadota;c__Alphaproteobacteria;o__Sphingomonadales;f__Sphingomonadaceae;g__Erythrobacter;s__Unclassified	973	2924000	14892	3224	1764	248	73.12	7.17
MAG835	d__Bacteria;p__Actinomycetota;c__Actinomycetia;o__Actinomycetales;f__Brevibacteriaceae;g__Brevibacterium;s__Brevibacterium yomogidense_A	971	2155231	7196	2326	1378	251	60.69	7.4
MAG688	d__Bacteria;p__Pseudomonadota;c__Alphaproteobacteria;o__Sphingomonadales;f__Sphingomonadaceae;g__Sphingorhabdus_B;s__Unclassified	970	1737348	8587	1833	1141	215	51.05	2.24
MAG814	d__Bacteria;p__Verrucomicrobiota;c__Verrucomicrobiae;o__Chthoniobacterales;f__UBA10450;g__CADDYX01;s__Unclassified	970	1512151	6455	1552	1073	220	53.48	5.65
MAG110	d__Bacteria;p__Acidobacteriota;c__Vicinamibacteria;o__Vicinamibacterales;f__SCN-69-37;g__Unclassified;s__Unclassified	968	5741391	50369	7735	2789	329	94.7	3.27
MAG697	d__Bacteria;p__Deinococcota;c__Deinococci;o__Deinococcales;f__Deinococcaceae;g__Deinococcus;s__Unclassified	968	1672315	6553	1749	1120	211	52.9	0.32
MAG1120	d__Bacteria;p__Actinomycetota;c__Actinomycetia;o__Actinomycetales;f__Dermatophilaceae;g__Mobilicoccus;s__Unclassified	968	2471299	31313	2956	1273	252	73.01	2.93
MAG769	d__Bacteria;p__Actinomycetota;c__Actinomycetia;o__Mycobacteriales;f__Mycobacteriaceae;g__Corynebacterium;s__Corynebacterium stationis	968	2450390	43696	3034	1231	238	66.07	5.12
MAG216	d__Bacteria;p__Pseudomonadota;c__Alphaproteobacteria;o__Caulobacterales;f__Caulobacteraceae;g__Phenylobacterium;s__Unclassified	966	2296904	8216	2519	1488	236	57.9	3.01
MAG987	d__Archaea;p__Thermoproteota;c__Nitrososphaeria;o__Nitrososphaerales;f__Nitrososphaeraceae;g__TH1177;s__Unclassified	961	1604720	5932	1688	1106	184	53.86	0.8
MAG1073	d__Bacteria;p__Actinomycetota;c__Actinomycetia;o__Propionibacteriales;f__Propionibacteriaceae;g__Aestuariimicrobium;s__Aestuariimicrobium sp017355265	960	2060736	12437	2298	1225	240	53.4	7.15
MAG311	d__Bacteria;p__Pseudomonadota;c__Alphaproteobacteria;o__Rhodobacterales;f__Rhodobacteraceae;g__Paracoccus;s__Paracoccus sp021491915	958	1594862	8037	1679	1109	211	57.02	0.81
MAG364	d__Bacteria;p__Acidobacteriota;c__Blastocatellia;o__Pyrinomonadales;f__Pyrinomonadaceae;g__OLB17;s__Unclassified	957	3258637	15966	3908	1875	267	73.77	6.69
MAG729	d__Bacteria;p__Gemmatimonadota;c__Gemmatimonadetes;o__Gemmatimonadales;f__Gemmatimonadaceae;g__UBA4720;s__Unclassified	957	2455526	20639	2922	1375	258	64	2.74
MAG194	d__Bacteria;p__Acidobacteriota;c__Blastocatellia;o__Pyrinomonadales;f__Pyrinomonadaceae;g__Unclassified;s__Unclassified	955	5175170	24419	6603	2964	283	80.43	0.69
MAG582	d__Archaea;p__Thermoproteota;c__Nitrososphaeria;o__Nitrososphaerales;f__Nitrososphaeraceae;g__TH1177;s__Unclassified	954	2381173	10669	2482	1627	196	65.83	7.83
MAG374	d__Bacteria;p__Actinomycetota;c__Actinomycetia;o__JAHEKZ01;f__JAHEKZ01;g__Unclassified;s__Unclassified	952	2258036	8902	2534	1576	236	61.47	9.21
MAG847	d__Bacteria;p__Gemmatimonadota;c__Gemmatimonadetes;o__Longimicrobiales;f__Longimicrobiaceae;g__Longimicrobium;s__Unclassified	951	6671096	51542	9495	3376	296	94.51	1.92
MAG834	d__Bacteria;p__Chloroflexota;c__Anaerolineae;o__Anaerolineales;f__EnvOPS12;g__UBA12294;s__Unclassified	948	3341010	16381	3743	2125	259	70.94	1.79
MAG164	d__Bacteria;p__Actinomycetota;c__Acidimicrobiia;o__IMCC26256;f__JACDBD01;g__JACDBD01;s__Unclassified	948	3384834	42075	4002	1911	241	59.33	3.57
MAG550	d__Bacteria;p__Acidobacteriota;c__Blastocatellia;o__Pyrinomonadales;f__Pyrinomonadaceae;g__OLB17;s__Unclassified	947	2967545	18225	4455	1371	265	88.55	6.76
MAG811	d__Bacteria;p__Actinomycetota;c__Actinomycetia;o__Propionibacteriales;f__Propionibacteriaceae;g__Raineyella;s__Unclassified	947	2297631	17935	2881	1236	244	55.22	6.72
MAG351	d__Bacteria;p__Acidobacteriota;c__Terriglobia;o__Bryobacterales;f__Bryobacteraceae;g__Bog-105;s__Unclassified	946	2732967	12872	3059	1786	260	60.66	5.23
MAG892	d__Bacteria;p__Bacteroidota;c__Bacteroidia;o__Flavobacteriales;f__Flavobacteriaceae;g__Flavobacterium;s__Unclassified	946	1549537	6828	1640	1109	214	52.43	4.4
MAG238	d__Bacteria;p__Bacillota;c__Bacilli;o__Exiguobacterales;f__Exiguobacteraceae;g__Exiguobacterium_A;s__Exiguobacterium_A indicum	944	2266537	14120	2744	1303	224	75.57	5.15
MAG909	d__Bacteria;p__Pseudomonadota;c__Gammaproteobacteria;o__Steroidobacterales;f__Steroidobacteraceae;g__ZC4RG30;s__Unclassified	940	1611673	5362	1741	1145	228	54.04	1.74
MAG691	d__Bacteria;p__Pseudomonadota;c__Gammaproteobacteria;o__Xanthomonadales;f__Xanthomonadaceae;g__Lysobacter;s__Unclassified	939	3491245	20022	4376	1983	259	80.3	6.13
MAG182	d__Bacteria;p__Actinomycetota;c__Actinomycetia;o__Mycobacteriales;f__Mycobacteriaceae;g__Mycobacterium;s__Mycobacterium sp023460175	937	2780133	20919	3899	1431	254	53.51	7.21
MAG632	d__Bacteria;p__Chloroflexota;c__Anaerolineae;o__Promineofilales;f__Promineofilaceae;g__Promineofilum;s__Unclassified	936	3182801	13660	3738	2031	269	59.4	2.38
MAG1114	d__Bacteria;p__Pseudomonadota;c__Alphaproteobacteria;o__Rhizobiales;f__Xanthobacteraceae;g__Bradyrhizobium;s__Unclassified	934	3851828	36495	5652	1817	266	82.54	2.23
MAG621	d__Bacteria;p__Chloroflexota;c__UBA6077;o__UBA6077;f__CF-72;g__CF-72;s__Unclassified	933	3085228	19160	3609	1891	274	55.05	0.6
MAG1098	d__Bacteria;p__Pseudomonadota;c__Gammaproteobacteria;o__Pseudomonadales;f__Moraxellaceae;g__Acinetobacter;s__Acinetobacter brisouii	932	1650626	7310	1822	1151	214	62.14	2.58
MAG125	d__Bacteria;p__Actinomycetota;c__Actinomycetia;o__Mycobacteriales;f__Nakamurellaceae;g__Nakamurella;s__Unclassified	932	4767051	26994	5877	2776	279	71.19	6.34
MAG829	d__Bacteria;p__Gemmatimonadota;c__Gemmatimonadetes;o__Gemmatimonadales;f__Gemmatimonadaceae;g__JADGGM01;s__Unclassified	931	3195754	14167	3908	1954	272	66.38	2.24
MAG988	d__Bacteria;p__Actinomycetota;c__Acidimicrobiia;o__Acidimicrobiales;f__Ilumatobacteraceae;g__Ilumatobacter;s__Unclassified	931	2876112	10239	3493	1777	257	65.38	5
MAG635	d__Bacteria;p__Pseudomonadota;c__Gammaproteobacteria;o__Steroidobacterales;f__Steroidobacteraceae;g__JADGHX01;s__Unclassified	927	7677339	46266	9915	4385	321	68.08	2.69
MAG254	d__Bacteria;p__Actinomycetota;c__Actinomycetia;o__Mycobacteriales;f__Mycobacteriaceae;g__Corynebacterium;s__Corynebacterium glutamicum	921	2719932	20899	3655	1342	252	82.06	7.55
MAG750	d__Bacteria;p__Bacillota;c__Bacilli;o__Bacillales;f__Bacillaceae_H;g__Priestia;s__Priestia megaterium	919	2748138	16867	3173	1789	226	67.15	1.21
MAG1021	d__Archaea;p__Thermoproteota;c__Nitrososphaeria;o__Nitrososphaerales;f__Nitrososphaeraceae;g__TH1177;s__Unclassified	918	1575799	7513	1727	1122	186	69.81	5.99
MAG823	d__Bacteria;p__Acidobacteriota;c__Blastocatellia;o__Pyrinomonadales;f__Pyrinomonadaceae;g__OLB17;s__Unclassified	915	3153187	15361	3817	1935	276	75.62	3.47
MAG762	d__Bacteria;p__Actinomycetota;c__Actinomycetia;o__Propionibacteriales;f__Nocardioidaceae;g__Nocardioides;s__Unclassified	905	1997654	8221	2157	1584	232	50.96	6.74
MAG655	d__Bacteria;p__Actinomycetota;c__Actinomycetia;o__Actinomycetales;f__Brevibacteriaceae;g__Brevibacterium;s__Brevibacterium aurantiacum	903	4681833	44915	6652	2484	277	84.75	5.83
MAG372	d__Bacteria;p__Nitrospirota;c__Nitrospiria;o__Nitrospirales;f__Nitrospiraceae;g__Nitrospira_F;s__Unclassified	903	2814884	12550	3323	1859	238	78.81	6.69
MAG1033	d__Bacteria;p__Bacteroidota;c__Bacteroidia;o__Flavobacteriales;f__Weeksellaceae;g__Planobacterium;s__Planobacterium lacus	901	1574460	6620	1847	1136	223	53.07	6.99
MAG64	d__Bacteria;p__Chloroflexota;c__Chloroflexia;o__Thermomicrobiales;f__UBA6265;g__JAMLHN01;s__Unclassified	899	3825805	20570	5190	2218	276	87.65	3.28
MAG322	d__Bacteria;p__Pseudomonadota;c__Alphaproteobacteria;o__Rhodobacterales;f__Rhodobacteraceae;g__Paracoccus;s__Paracoccus sp021491915	899	1428043	5178	1598	1093	207	55.68	0.73
MAG63	d__Bacteria;p__Bacillota_A;c__Clostridia;o__Lachnospirales;f__Lachnospiraceae;g__Mediterraneibacter;s__Mediterraneibacter faecigallinarum	898	1662021	12188	1931	1164	234	73.14	4.81
MAG736	d__Bacteria;p__Chloroflexota;c__UBA6077;o__UBA6077;f__CF-72;g__Unclassified;s__Unclassified	896	4405675	27361	6080	2538	286	80.63	7.98
MAG177	d__Archaea;p__Thermoproteota;c__Nitrososphaeria;o__Nitrososphaerales;f__Nitrososphaeraceae;g__Nitrosocosmicus;s__Nitrosocosmicus oleophilus	896	2273880	15096	2908	1339	188	70.62	0.25
MAG165	d__Bacteria;p__Actinomycetota;c__Actinomycetia;o__Propionibacteriales;f__Nocardioidaceae;g__Nocardioides;s__Unclassified	893	3109588	14774	3716	2168	258	62.56	8.52
MAG807	d__Bacteria;p__Pseudomonadota;c__Gammaproteobacteria;o__Burkholderiales;f__Casimicrobiaceae;g__VBCG01;s__Unclassified	890	2235365	10109	2552	1663	246	59.67	2.8
MAG817	d__Bacteria;p__Pseudomonadota;c__Gammaproteobacteria;o__Enterobacterales;f__Enterobacteriaceae;g__Escherichia;s__Escherichia coli	887	3614778	32360	6031	1763	266	79.69	0.11
MAG579	d__Bacteria;p__Actinomycetota;c__Acidimicrobiia;o__Acidimicrobiales;f__JADJXE01;g__Unclassified;s__Unclassified	886	3009026	16252	3914	1943	258	79.91	1.39
MAG45	d__Bacteria;p__Actinomycetota;c__Actinomycetia;o__Mycobacteriales;f__Mycobacteriaceae;g__Mycobacterium;s__Mycobacterium sp023460175	883	2869123	17446	3603	1829	265	54.92	5.75
MAG510	d__Bacteria;p__Pseudomonadota;c__Alphaproteobacteria;o__Rhizobiales;f__Xanthobacteraceae;g__Bradyrhizobium;s__Unclassified	882	3442517	23755	4377	2220	239	52.74	5.12
MAG803	d__Bacteria;p__Nitrospirota;c__Nitrospiria;o__Nitrospirales;f__Nitrospiraceae;g__Nitrospira_F;s__Unclassified	882	1699360	7539	1964	1254	214	50.86	4.81
MAG261	d__Bacteria;p__Actinomycetota;c__Thermoleophilia;o__Gaiellales;f__Gaiellaceae;g__PALSA-600;s__Unclassified	878	2974447	16493	3717	1873	245	62.75	4.86
MAG356	d__Bacteria;p__Pseudomonadota;c__Alphaproteobacteria;o__Rhizobiales;f__Xanthobacteraceae;g__Tardiphaga;s__Unclassified	876	2547777	14683	3055	1753	253	61.57	9.66
MAG87	d__Bacteria;p__Cyanobacteriota;c__Cyanobacteriia;o__Cyanobacteriales;f__Xenococcaceae;g__Waterburya;s__Unclassified	872	4485664	29586	6344	2624	265	91.72	3.61
MAG385	d__Bacteria;p__Actinomycetota;c__Acidimicrobiia;o__Acidimicrobiales;f__JAAYBP01;g__Unclassified;s__Unclassified	870	3542671	22543	4743	2120	278	87.86	1.59
MAG249	d__Bacteria;p__Bacteroidota;c__Bacteroidia;o__Flavobacteriales;f__Weeksellaceae;g__Kaistella;s__Kaistella faecale	868	1245845	5458	1395	1061	206	52.46	6.55
MAG314	d__Bacteria;p__Actinomycetota;c__Actinomycetia;o__Propionibacteriales;f__Nocardioidaceae;g__Nocardioides;s__Unclassified	868	1975263	7187	2220	1593	237	51.22	4.7
MAG84	d__Archaea;p__Thermoproteota;c__Nitrososphaeria;o__Nitrososphaerales;f__Nitrososphaeraceae;g__Nitrosocosmicus;s__Nitrosocosmicus oleophilus	866	2769077	19398	4074	1608	198	84.66	0.21
MAG633	d__Bacteria;p__Pseudomonadota;c__Unclassified;o__Unclassified;f__Unclassified;g__Unclassified;s__Unclassified	864	1735073	5446	1906	1563	240	50.04	6.84
MAG506	d__Bacteria;p__Actinomycetota;c__Actinomycetia;o__Actinomycetales;f__Micrococcaceae;g__Arthrobacter;s__Unclassified	861	2432176	31165	3221	1514	242	63.24	2.68
MAG661	d__Bacteria;p__Bacillota;c__Bacilli;o__Exiguobacterales;f__Exiguobacteraceae;g__Exiguobacterium_A;s__Exiguobacterium_A sibiricum	861	2231531	25569	3056	1332	239	74.1	7.14
MAG490	d__Bacteria;p__Pseudomonadota;c__Alphaproteobacteria;o__Sphingomonadales;f__Sphingomonadaceae;g__Allosphingosinicella;s__Unclassified	857	2825457	16590	3724	1886	251	74.27	5.84
MAG745	d__Bacteria;p__Gemmatimonadota;c__Gemmatimonadetes;o__Gemmatimonadales;f__Gemmatimonadaceae;g__Fen-1247;s__Unclassified	857	2508236	13246	3269	1719	267	63.67	3.01
MAG752	d__Bacteria;p__Actinomycetota;c__Acidimicrobiia;o__Acidimicrobiales;f__Ilumatobacteraceae;g__Desertimonas;s__Unclassified	856	2527640	18207	3178	1749	265	76.76	3.16
MAG536	d__Bacteria;p__Pseudomonadota;c__Gammaproteobacteria;o__Pseudomonadales;f__Moraxellaceae;g__Acinetobacter;s__Acinetobacter pseudolwoffii	856	1946430	16112	2543	1245	238	52.54	6.86
MAG653	d__Bacteria;p__Pseudomonadota;c__Gammaproteobacteria;o__Burkholderiales;f__SG8-39;g__SCGC-AG-212-J23;s__Unclassified	853	3832390	52307	5655	2133	258	89.94	2.4
MAG272	d__Bacteria;p__Pseudomonadota;c__Alphaproteobacteria;o__Sphingomonadales;f__Sphingomonadaceae;g__Allosphingosinicella;s__Unclassified	853	1947702	8785	2229	1606	229	54.22	2.56
MAG973	d__Bacteria;p__Gemmatimonadota;c__Gemmatimonadetes;o__Gemmatimonadales;f__Gemmatimonadaceae;g__Fen-1247;s__Unclassified	853	3038762	16891	4074	1955	284	70.14	8.65
MAG854	d__Bacteria;p__Actinomycetota;c__Actinomycetia;o__JACCUZ01;f__JACCUZ01;g__Unclassified;s__Unclassified	852	2428322	23388	3689	1379	256	52.02	8.67
MAG179	d__Bacteria;p__Actinomycetota;c__Actinomycetia;o__Actinomycetales;f__Dermabacteraceae;g__Brachybacterium;s__Unclassified	850	3604097	39168	6289	1786	287	79.85	9.98
MAG174	d__Bacteria;p__Actinomycetota;c__Actinomycetia;o__Actinomycetales;f__Micrococcaceae;g__Arthrobacter;s__Arthrobacter oxydans	849	3092749	17653	4274	1934	267	77.53	2.48
MAG637	d__Bacteria;p__Cyanobacteriota;c__Vampirovibrionia;o__Caenarcaniphilales;f__Caenarcanaceae;g__Unclassified;s__Unclassified	846	1710371	8383	2161	1195	222	69.21	4.49
MAG695	d__Bacteria;p__Gemmatimonadota;c__Gemmatimonadetes;o__Gemmatimonadales;f__Gemmatimonadaceae;g__UBA4720;s__Unclassified	844	2369404	21799	3458	1359	263	75.38	3.52
MAG421	d__Bacteria;p__Bacteroidota;c__Bacteroidia;o__Sphingobacteriales;f__Sphingobacteriaceae;g__Sphingobacterium;s__Unclassified	843	2100974	14936	2839	1286	278	57.09	8.56
MAG348	d__Bacteria;p__Bacteroidota;c__Bacteroidia;o__Chitinophagales;f__Chitinophagaceae;g__Segetibacter;s__Unclassified	840	2057921	9929	2466	1634	227	57.73	5.35
MAG923	d__Bacteria;p__Pseudomonadota;c__Gammaproteobacteria;o__Burkholderiales;f__Burkholderiaceae_B;g__Ramlibacter;s__Unclassified	839	3264116	16823	4779	2030	258	75.18	2.48
MAG158	d__Bacteria;p__Patescibacteria;c__Saccharimonadia;o__Saccharimonadales;f__UBA1547;g__JALRBM01;s__Unclassified	838	1153653	6337	1315	1050	178	52.4	6.72
MAG53	d__Bacteria;p__Pseudomonadota;c__Gammaproteobacteria;o__Burkholderiales;f__Burkholderiaceae_A;g__Unclassified;s__Unclassified	838	1957337	8548	2286	1610	244	51.52	6.21
MAG1060	d__Bacteria;p__Chloroflexota;c__UBA6077;o__UBA6077;f__CF-72;g__Unclassified;s__Unclassified	837	5812258	44183	9720	3308	295	89.83	9.09
MAG849	d__Bacteria;p__Chloroflexota;c__Anaerolineae;o__Anaerolineales;f__EnvOPS12;g__UBA12294;s__Unclassified	836	3362589	27940	4405	2302	271	54.34	1.78
MAG196	d__Bacteria;p__Pseudomonadota;c__Gammaproteobacteria;o__Xanthomonadales;f__Xanthomonadaceae;g__Thermomonas;s__Unclassified	834	2436871	12669	3033	1745	260	65.77	8.12
MAG298	d__Bacteria;p__Pseudomonadota;c__Alphaproteobacteria;o__Rhizobiales;f__Beijerinckiaceae;g__Unclassified;s__Unclassified	831	3605604	18101	4898	2518	269	66.97	2.64
MAG893	d__Bacteria;p__Nitrospirota;c__Nitrospiria;o__Nitrospirales;f__Nitrospiraceae;g__Nitrospira_F;s__Unclassified	830	1879823	9349	2218	1637	230	51.29	4.21
MAG756	d__Bacteria;p__Gemmatimonadota;c__Gemmatimonadetes;o__Gemmatimonadales;f__Gemmatimonadaceae;g__JABFXC01;s__Unclassified	829	2931069	29017	4755	1537	279	69.3	5.86
MAG773	d__Archaea;p__Thermoproteota;c__Nitrososphaeria;o__Nitrososphaerales;f__Nitrososphaeraceae;g__Nitrosocosmicus;s__Nitrosocosmicus oleophilus	827	2170267	11659	2649	1664	194	72.77	8.87
MAG181	d__Bacteria;p__Actinomycetota;c__Actinomycetia;o__Actinomycetales;f__Dermatophilaceae;g__Unclassified;s__Unclassified	826	2867339	11826	3704	2298	261	59.16	7.7
MAG739	d__Bacteria;p__Pseudomonadota;c__Gammaproteobacteria;o__Burkholderiales;f__SG8-39;g__SCGC-AG-212-J23;s__Unclassified	825	3476124	24809	5052	2095	258	93.29	1.45
MAG465	d__Archaea;p__Thermoproteota;c__Nitrososphaeria;o__Nitrososphaerales;f__Nitrososphaeraceae;g__TH1177;s__Unclassified	825	1375133	6401	1695	1109	195	59.06	2.6
MAG556	d__Bacteria;p__Chloroflexota;c__Anaerolineae;o__Anaerolineales;f__EnvOPS12;g__UBA12294;s__Unclassified	825	3282306	20098	4328	2285	269	59.59	3.22
MAG993	d__Archaea;p__Thermoproteota;c__Nitrososphaeria;o__Nitrososphaerales;f__Nitrososphaeraceae;g__TH5893;s__Unclassified	824	1606320	14563	2034	1134	187	73.4	5.22
MAG744	d__Bacteria;p__Actinomycetota;c__Actinomycetia;o__Actinomycetales;f__Micrococcaceae;g__Arthrobacter;s__Unclassified	819	2862878	22112	3782	2057	267	58.42	0.89
MAG120	d__Bacteria;p__Pseudomonadota;c__Alphaproteobacteria;o__Rhizobiales;f__Hyphomicrobiaceae;g__AWTP1-13;s__Unclassified	816	3707059	30644	5443	2428	256	58.74	1.3
MAG1083	d__Bacteria;p__Actinomycetota;c__Actinomycetia;o__Actinomycetales;f__Dermatophilaceae;g__Pedococcus;s__Unclassified	814	3561302	49991	7088	1772	263	82.45	6.34
MAG288	d__Bacteria;p__Bacteroidota;c__Bacteroidia;o__Sphingobacteriales;f__Sphingobacteriaceae;g__Sphingobacterium;s__Sphingobacterium alimentarium	811	2637718	29964	4487	1446	279	74.32	2.35
MAG443	d__Bacteria;p__Bacteroidota;c__Bacteroidia;o__Chitinophagales;f__Chitinophagaceae;g__Unclassified;s__Unclassified	809	2608228	17367	3958	1596	267	71.98	3.59
MAG1035	d__Bacteria;p__Actinomycetota;c__Actinomycetia;o__Actinomycetales;f__Cellulomonadaceae;g__Timonella;s__Unclassified	808	1445423	7207	1875	1132	226	52.92	5.33
MAG203	d__Bacteria;p__Actinomycetota;c__Acidimicrobiia;o__Acidimicrobiales;f__JACDEA01;g__JACCXE01;s__Unclassified	808	2863437	15060	4070	2055	254	73.51	3.59
MAG391	d__Bacteria;p__Acidobacteriota;c__Blastocatellia;o__Pyrinomonadales;f__Pyrinomonadaceae;g__Unclassified;s__Unclassified	806	5272015	61834	9658	3079	316	92.58	1.46
MAG1037	d__Bacteria;p__Actinomycetota;c__Actinomycetia;o__Actinomycetales;f__Micrococcaceae;g__Arthrobacter;s__Unclassified	805	2591169	28320	4108	1580	253	71.26	1.88
MAG673	d__Bacteria;p__Bacillota_A;c__Clostridia;o__Clostridiales;f__Clostridiaceae;g__JG1575;s__Unclassified	803	1732696	10243	2388	1237	228	76.78	1.06
MAG1103	d__Bacteria;p__Actinomycetota;c__Rubrobacteria;o__Rubrobacterales;f__Rubrobacteraceae;g__Rubrobacter_D;s__Unclassified	801	2430030	16202	3203	1828	242	56.55	1.15
MAG902	d__Bacteria;p__Actinomycetota;c__Thermoleophilia;o__Solirubrobacterales;f__Solirubrobacteraceae;g__Palsa-465;s__Unclassified	801	2135111	9928	2747	1713	241	60.7	0.51
MAG35	d__Bacteria;p__Pseudomonadota;c__Gammaproteobacteria;o__Burkholderiales;f__SG8-39;g__SCGC-AG-212-J23;s__Unclassified	797	3412891	29718	5128	2109	258	89.3	0.97
MAG19	d__Bacteria;p__Gemmatimonadota;c__Gemmatimonadetes;o__Gemmatimonadales;f__Gemmatimonadaceae;g__JABFXC01;s__Unclassified	797	3275389	36288	5689	1871	285	77.56	4.71
MAG844	d__Bacteria;p__Bacteroidota;c__Bacteroidia;o__Chitinophagales;f__Chitinophagaceae;g__Hanamia;s__Unclassified	794	2956473	21348	4324	1942	279	88.44	4.63
MAG278	d__Bacteria;p__Acidobacteriota;c__Vicinamibacteria;o__Vicinamibacterales;f__UBA2999;g__12-FULL-67-14b;s__Unclassified	793	3646913	25647	7155	1885	312	63	5.25
MAG1040	d__Bacteria;p__Bacillota;c__Bacilli;o__Bacillales;f__Planococcaceae;g__Kurthia;s__Kurthia intestinigallinarum	792	1897555	18801	2612	1294	226	61.92	4.48
MAG761	d__Bacteria;p__Actinomycetota;c__Actinomycetia;o__Actinomycetales;f__Cellulomonadaceae;g__Cellulosimicrobium;s__Cellulosimicrobium funkei	790	2634223	13354	3776	1866	272	62.98	0.34
MAG664	d__Bacteria;p__Actinomycetota;c__Actinomycetia;o__Actinomycetales;f__Dermatophilaceae;g__F2B08;s__Unclassified	790	3054311	29442	4352	2160	270	70.81	5.36
MAG139	d__Bacteria;p__Pseudomonadota;c__Gammaproteobacteria;o__Burkholderiales;f__Burkholderiaceae_C;g__Alcaligenes;s__Alcaligenes faecalis	788	3025704	16797	4481	2121	266	82.19	1.87
MAG147	d__Bacteria;p__Nitrospirota;c__Nitrospiria;o__Nitrospirales;f__Nitrospiraceae;g__Nitrospira_F;s__Unclassified	788	2711394	23910	3793	1907	238	63.57	5.61
MAG22	d__Bacteria;p__Actinomycetota;c__Acidimicrobiia;o__Acidimicrobiales;f__AC-14;g__CADCTB01;s__Unclassified	786	2649578	16620	3723	1874	250	77.59	2.57
MAG1010	d__Bacteria;p__Bacillota_A;c__Clostridia;o__Lachnospirales;f__Lachnospiraceae;g__UBA2868;s__UBA2868 sp004552595	784	1210256	8425	1516	1082	218	50.14	6.4
MAG1087	d__Bacteria;p__Pseudomonadota;c__Alphaproteobacteria;o__Rhizobiales;f__Xanthobacteraceae;g__Bradyrhizobium;s__Unclassified	781	4115866	31459	6712	2582	273	81.08	2.11
MAG701	d__Bacteria;p__Dormibacterota;c__Dormibacteria;o__Dormibacterales;f__Dormibacteraceae;g__CF-161;s__Unclassified	778	3309369	27603	5466	2058	245	70.67	2.2
MAG137	d__Bacteria;p__Desulfobacterota_B;c__Binatia;o__UBA9968;f__UBA9968;g__WHTF01;s__Unclassified	770	2230341	12876	3041	1829	248	52.54	2.18
MAG1011	d__Bacteria;p__Pseudomonadota;c__Alphaproteobacteria;o__Sphingomonadales;f__Sphingomonadaceae;g__Allosphingosinicella;s__Unclassified	765	3265373	27463	5188	2248	262	72.25	4.83
MAG434	d__Bacteria;p__Bacillota;c__Bacilli;o__Lactobacillales;f__Enterococcaceae;g__Enterococcus_B;s__Enterococcus_B faecium	764	1543273	7304	2145	1203	219	58.34	1.68
MAG108	d__Bacteria;p__Bacillota;c__Bacilli;o__Bacillales_K;f__Sporolactobacillaceae;g__Unclassified;s__Unclassified	763	2156838	26119	3525	1357	232	88.42	2.71
MAG118	d__Bacteria;p__Pseudomonadota;c__Gammaproteobacteria;o__Xanthomonadales;f__Xanthomonadaceae;g__Luteimonas_D;s__Unclassified	760	2432801	16837	3989	1553	269	82.57	4.53
MAG294	d__Bacteria;p__Actinomycetota;c__Actinomycetia;o__Actinomycetales;f__Dermatophilaceae;g__F2B08;s__Unclassified	760	2267466	20146	3142	1758	260	76.51	3.4
MAG540	d__Bacteria;p__Actinomycetota;c__Actinomycetia;o__Actinomycetales;f__Micrococcaceae;g__Arthrobacter_H;s__Arthrobacter_H sp016892645	757	2565739	27291	3738	1839	264	69.22	3.11
MAG862	d__Bacteria;p__Pseudomonadota;c__Alphaproteobacteria;o__Sphingomonadales;f__Sphingomonadaceae;g__Allosphingosinicella;s__Unclassified	757	2718381	20345	4052	1937	243	76.34	5.02
MAG1072	d__Bacteria;p__Pseudomonadota;c__Alphaproteobacteria;o__Rhizobiales;f__Rhizobiaceae;g__Aquamicrobium_A;s__Unclassified	757	2375977	12287	3436	1889	254	69.11	1.75
MAG303	d__Bacteria;p__Actinomycetota;c__Actinomycetia;o__Actinomycetales;f__Micrococcaceae;g__Kocuria;s__Kocuria rosea	755	2241832	16050	3107	1752	263	60.72	2.97
MAG50	d__Bacteria;p__Gemmatimonadota;c__Gemmatimonadetes;o__Longimicrobiales;f__Longimicrobiaceae;g__Longimicrobium;s__Unclassified	753	6436266	63416	13298	3971	306	100	4
MAG190	d__Bacteria;p__Acidobacteriota;c__Vicinamibacteria;o__Vicinamibacterales;f__2-12-FULL-66-21;g__JACDCA01;s__Unclassified	753	5645462	50744	11087	3444	334	94.15	5.92
MAG28	d__Bacteria;p__Actinomycetota;c__Actinomycetia;o__Actinomycetales;f__Micrococcaceae;g__Arthrobacter_K;s__Unclassified	753	3185009	49726	5669	1958	272	80.52	4.1
MAG971	d__Bacteria;p__Pseudomonadota;c__Alphaproteobacteria;o__Rhodobacterales;f__Rhodobacteraceae;g__Paracoccus;s__Paracoccus sp021491915	753	2115700	11500	2934	1743	240	65.17	2.18
MAG650	d__Bacteria;p__Gemmatimonadota;c__Gemmatimonadetes;o__Gemmatimonadales;f__GWC2-71-9;g__Unclassified;s__Unclassified	752	3716101	34983	7107	2194	297	83.15	1.28
MAG499	d__Bacteria;p__Pseudomonadota;c__Alphaproteobacteria;o__Caulobacterales;f__Caulobacteraceae;g__Phenylobacterium;s__Unclassified	752	2364924	14218	3357	1946	241	61.83	5.52
MAG713	d__Bacteria;p__Pseudomonadota;c__Gammaproteobacteria;o__Burkholderiales;f__SG8-39;g__SCGC-AG-212-J23;s__Unclassified	751	4351263	34360	7986	2660	269	93.69	3.23
MAG816	d__Bacteria;p__Bacteroidota;c__Bacteroidia;o__Chitinophagales;f__Chitinophagaceae;g__Ferruginibacter;s__Unclassified	749	2561624	16187	4226	1795	289	80.25	0.64
MAG670	d__Bacteria;p__Actinomycetota;c__Actinomycetia;o__Actinomycetales;f__Micrococcaceae;g__Arthrobacter;s__Arthrobacter oxydans	749	3236873	26655	6126	1994	275	76.94	4.16
MAG1039	d__Bacteria;p__Actinomycetota;c__Thermoleophilia;o__Solirubrobacterales;f__Solirubrobacteraceae;g__Unclassified;s__Unclassified	749	3687086	64616	6992	2274	266	65.43	3.42
MAG904	d__Bacteria;p__Actinomycetota;c__Actinomycetia;o__Actinomycetales;f__Dermatophilaceae;g__Flexivirga;s__Unclassified	748	2321707	18192	3421	1835	260	60.26	2.27
MAG806	d__Bacteria;p__Actinomycetota;c__Actinomycetia;o__Actinomycetales;f__Micrococcaceae;g__Kocuria;s__Unclassified	746	2184785	9906	3097	1760	264	63.39	0.92
MAG522	d__Bacteria;p__Gemmatimonadota;c__Gemmatimonadetes;o__Gemmatimonadales;f__Gemmatimonadaceae;g__JABFXC01;s__Unclassified	740	2281656	14409	3352	1792	272	51.5	3.47
MAG763	d__Bacteria;p__Gemmatimonadota;c__Gemmatimonadetes;o__Gemmatimonadales;f__Gemmatimonadaceae;g__JABFXC01;s__Unclassified	739	2785134	29480	5233	1724	283	71.84	4.47
MAG491	d__Bacteria;p__Bacteroidota;c__Bacteroidia;o__Cytophagales;f__Cyclobacteriaceae;g__Unclassified;s__Unclassified	738	4208832	82877	9801	2269	307	91.37	1.15
MAG526	d__Bacteria;p__Pseudomonadota;c__Gammaproteobacteria;o__Burkholderiales;f__SG8-39;g__SCGC-AG-212-J23;s__Unclassified	738	3997857	37213	8375	2393	263	89.69	4.73
MAG382	d__Bacteria;p__Chloroflexota;c__UBA5177;o__UBA5177;f__UBA5177;g__Unclassified;s__Unclassified	737	3465571	30794	5807	2414	276	81.61	1.67
MAG891	d__Bacteria;p__Myxococcota;c__Myxococcia;o__Myxococcales;f__Anaeromyxobacteraceae;g__Anaeromyxobacter;s__Unclassified	737	3479700	22678	5788	2357	283	91.51	3.55
MAG142	d__Bacteria;p__Pseudomonadota;c__Alphaproteobacteria;o__Sphingomonadales;f__Sphingomonadaceae;g__Erythrobacter;s__Unclassified	737	1924428	27702	2941	1371	245	52.71	2.89
MAG101	d__Bacteria;p__Pseudomonadota;c__Gammaproteobacteria;o__Burkholderiales;f__Burkholderiaceae_B;g__Ramlibacter;s__Unclassified	735	3494309	25454	5957	2345	269	82.72	1.46
MAG1009	d__Archaea;p__Thermoproteota;c__Nitrososphaeria;o__Nitrososphaerales;f__Nitrososphaeraceae;g__TH1177;s__Unclassified	735	2341486	22842	3489	1759	198	78.13	7.31
MAG237	d__Bacteria;p__Pseudomonadota;c__Alphaproteobacteria;o__Rhizobiales;f__Rhizobiaceae;g__Paenochrobactrum;s__Paenochrobactrum gallinarii	734	1804207	10906	2714	1477	240	64.86	1.31
MAG931	d__Bacteria;p__Chloroflexota;c__Limnocylindria;o__Limnocylindrales;f__CSP1-4;g__SPCO01;s__Unclassified	733	2465920	16937	3523	2190	256	56.67	8.72
MAG458	d__Bacteria;p__Bacteroidota;c__Rhodothermia;o__Rhodothermales;f__Rubricoccaceae;g__Unclassified;s__Unclassified	732	2063619	15337	3002	1717	263	65.71	2.63
MAG554	d__Bacteria;p__Pseudomonadota;c__Gammaproteobacteria;o__Burkholderiales;f__Burkholderiaceae;g__Telluria;s__Unclassified	732	3305110	22274	5634	2328	289	67.69	5.98
MAG1129	d__Bacteria;p__Pseudomonadota;c__Alphaproteobacteria;o__Rhodobacterales;f__Rhodobacteraceae;g__Paracoccus;s__Paracoccus sp021491915	730	1995426	12592	3041	1618	244	72.12	2.94
MAG151	d__Bacteria;p__Actinomycetota;c__Thermoleophilia;o__Solirubrobacterales;f__Solirubrobacteraceae;g__Palsa-465;s__Unclassified	728	5061061	36511	9181	3468	279	79.86	3.92
MAG1003	d__Bacteria;p__Bacteroidota;c__Bacteroidia;o__Flavobacteriales;f__Weeksellaceae;g__Kaistella;s__Unclassified	727	2484897	35977	4581	1537	263	85.34	7.34
MAG375	d__Bacteria;p__Actinomycetota;c__Thermoleophilia;o__Gaiellales;f__Gaiellaceae;g__GMQP-bins7;s__Unclassified	725	2036338	12745	2874	1700	240	72.21	7.61
MAG218	d__Bacteria;p__Pseudomonadota;c__Gammaproteobacteria;o__Burkholderiales;f__SG8-39;g__SCGC-AG-212-J23;s__Unclassified	724	3248902	27408	5145	2592	256	81.89	1.55
MAG570	d__Bacteria;p__Acidobacteriota;c__Blastocatellia;o__Pyrinomonadales;f__Pyrinomonadaceae;g__OLB17;s__Unclassified	724	3863697	27639	6877	2769	303	90.49	1.05
MAG709	d__Bacteria;p__Pseudomonadota;c__Gammaproteobacteria;o__Xanthomonadales;f__Xanthomonadaceae;g__Lysobacter;s__Unclassified	724	2099701	11971	3118	1744	255	62.77	2.53
MAG895	d__Bacteria;p__Pseudomonadota;c__Alphaproteobacteria;o__Rhodobacterales;f__Rhodobacteraceae;g__Paracoccus;s__Unclassified	723	2020440	17207	3284	1470	247	78.03	0.36
MAG963	d__Bacteria;p__Actinomycetota;c__Actinomycetia;o__Actinomycetales;f__Dermatophilaceae;g__Janibacter;s__Unclassified	723	1916363	8986	2692	1697	251	65.1	2.21
MAG705	d__Bacteria;p__Nitrospirota;c__Nitrospiria;o__Nitrospirales;f__Nitrospiraceae;g__Nitrospira_F;s__Unclassified	719	1880658	10564	2693	1735	241	56.25	4.64
MAG417	d__Bacteria;p__Pseudomonadota;c__Alphaproteobacteria;o__Sphingomonadales;f__Sphingomonadaceae;g__Allosphingosinicella;s__Unclassified	718	3510183	25845	5993	2488	269	86.94	2.23
MAG577	d__Archaea;p__Thermoproteota;c__Nitrososphaeria;o__Nitrososphaerales;f__Nitrososphaeraceae;g__Nitrosocosmicus;s__Nitrosocosmicus oleophilus	718	2401340	15181	3750	1845	202	81.71	1.81
MAG898	d__Bacteria;p__Pseudomonadota;c__Gammaproteobacteria;o__Burkholderiales;f__Burkholderiaceae_A;g__Unclassified;s__Unclassified	718	2962262	21914	4715	2293	280	79.34	4.79
MAG792	d__Bacteria;p__Patescibacteria;c__Microgenomatia;o__Levybacterales;f__GWA1-39-11;g__JAGORM01;s__Unclassified	717	1704415	18766	2768	1243	227	87.37	7.41
MAG242	d__Bacteria;p__Chloroflexota;c__Chloroflexia;o__Thermomicrobiales;f__UBA6265;g__UBA6265;s__Unclassified	717	2083550	17423	3603	1401	256	62.68	0.43
MAG913	d__Bacteria;p__Pseudomonadota;c__Alphaproteobacteria;o__Rhodobacterales;f__Rhodobacteraceae;g__Amaricoccus;s__Unclassified	715	2337755	14137	3634	1893	258	65.18	0.17
MAG429	d__Bacteria;p__Pseudomonadota;c__Gammaproteobacteria;o__Burkholderiales;f__Burkholderiaceae_B;g__Variovorax;s__Unclassified	715	4006439	89717	10896	2094	275	66.99	8.36
MAG676	d__Bacteria;p__Gemmatimonadota;c__Gemmatimonadetes;o__Gemmatimonadales;f__Gemmatimonadaceae;g__JADGGM01;s__Unclassified	714	3697048	29185	6726	2664	291	80.46	1.5
MAG851	d__Bacteria;p__Pseudomonadota;c__Alphaproteobacteria;o__Sphingomonadales;f__Sphingomonadaceae;g__Sphingomicrobium;s__Unclassified	713	1938723	16107	3331	1324	240	59.08	5
MAG376	d__Bacteria;p__Nitrospirota;c__Nitrospiria;o__Nitrospirales;f__Nitrospiraceae;g__Nitrospira_C;s__Unclassified	712	2299937	12428	3490	1922	246	82.08	2.4
MAG252	d__Bacteria;p__Pseudomonadota;c__Alphaproteobacteria;o__Sphingomonadales;f__Sphingomonadaceae;g__Sphingopyxis;s__Unclassified	706	2312077	16806	4106	1633	258	84.92	0.73
MAG775	d__Bacteria;p__Pseudomonadota;c__Gammaproteobacteria;o__Xanthomonadales;f__Xanthomonadaceae;g__Pseudoxanthomonas;s__Unclassified	704	2283693	15151	3656	1819	262	68.67	2.1
MAG774	d__Bacteria;p__Actinomycetota;c__Acidimicrobiia;o__Acidimicrobiales;f__JACDEA01;g__JACDEA01;s__Unclassified	703	2485805	21685	4027	1833	256	65.54	2.37
MAG512	d__Bacteria;p__Myxococcota;c__Myxococcia;o__Myxococcales;f__40CM-4-68-19;g__Unclassified;s__Unclassified	702	1780989	10985	2614	1661	257	50.86	2.85
MAG81	d__Bacteria;p__Actinomycetota;c__Actinomycetia;o__Actinomycetales;f__JAHECE01;g__JAHECE01;s__Unclassified	699	2455342	23798	3952	1896	273	84.14	3.4
MAG229	d__Archaea;p__Thermoproteota;c__Nitrososphaeria;o__Nitrososphaerales;f__Nitrososphaeraceae;g__Nitrososphaera;s__Unclassified	699	986295	4485	1334	1057	204	55.87	7.41
MAG113	d__Bacteria;p__Chloroflexota;c__UBA5177;o__UBA5177;f__UBA5177;g__Unclassified;s__Unclassified	699	1790977	10294	2590	1697	237	50.43	1.12
MAG941	d__Bacteria;p__Actinomycetota;c__Actinomycetia;o__Actinomycetales;f__Actinomycetaceae;g__Unclassified;s__Unclassified	696	2002222	12284	3098	1710	264	53.96	4.14
MAG754	d__Bacteria;p__Gemmatimonadota;c__Gemmatimonadetes;o__Gemmatimonadales;f__Gemmatimonadaceae;g__UBA4720;s__Unclassified	695	2635649	16041	4304	2139	283	59.22	5.19
MAG887	d__Bacteria;p__Bacillota;c__Bacilli;o__Staphylococcales;f__Salinicoccaceae;g__Jeotgalicoccus;s__Unclassified	693	1120503	7525	1603	1102	214	65.66	8.33
MAG222	d__Bacteria;p__Acidobacteriota;c__Vicinamibacteria;o__Vicinamibacterales;f__UBA2999;g__12-FULL-67-14b;s__Unclassified	692	4837169	57028	9377	3232	329	83.62	2.43
MAG206	d__Bacteria;p__Actinomycetota;c__Actinomycetia;o__Actinomycetales;f__Microbacteriaceae;g__Agromyces;s__Unclassified	692	1990483	9406	3122	1812	246	54.34	5.78
MAG515	d__Bacteria;p__Pseudomonadota;c__Gammaproteobacteria;o__Steroidobacterales;f__Steroidobacteraceae;g__SCUD01;s__Unclassified	690	2098700	14842	3268	1755	256	67.26	6.95
MAG702	d__Bacteria;p__Bacteroidota;c__Bacteroidia;o__AKYH767-A;f__Unclassified;g__Unclassified;s__Unclassified	689	1871181	10641	2860	1697	255	54.39	1.11
MAG808	d__Bacteria;p__Pseudomonadota;c__Gammaproteobacteria;o__Xanthomonadales;f__Rhodanobacteraceae;g__Unclassified;s__Unclassified	688	1642521	11881	2645	1382	249	64.01	2.4
MAG868	d__Bacteria;p__Pseudomonadota;c__Alphaproteobacteria;o__Rhodobacterales;f__Rhodobacteraceae;g__Paracoccus;s__Unclassified	686	1855707	12245	2802	1685	240	53.44	4.23
MAG475	d__Archaea;p__Thermoproteota;c__Nitrososphaeria;o__Nitrososphaerales;f__Nitrososphaeraceae;g__Nitrosocosmicus;s__Nitrosocosmicus oleophilus	684	1518325	12294	2162	1583	196	53.39	9.44
MAG565	d__Bacteria;p__Actinomycetota;c__Actinomycetia;o__Actinomycetales;f__Dermatophilaceae;g__Terrabacter;s__Unclassified	684	2431200	14970	3822	2187	261	53.14	0.43
MAG856	d__Bacteria;p__Pseudomonadota;c__Alphaproteobacteria;o__Sphingomonadales;f__Sphingomonadaceae;g__Aquisediminimonas;s__Unclassified	683	1721842	13907	3040	1283	233	51.38	2.74
MAG1059	d__Bacteria;p__Pseudomonadota;c__Gammaproteobacteria;o__Diplorickettsiales;f__Diplorickettsiaceae;g__Aquirickettsiella;s__Unclassified	683	1484103	11880	2416	1210	242	52.13	6.82
MAG602	d__Bacteria;p__Pseudomonadota;c__Alphaproteobacteria;o__Rhizobiales;f__Xanthobacteraceae;g__Bradyrhizobium;s__Unclassified	682	5441950	41860	8641	4745	272	60.27	5.46
MAG538	d__Bacteria;p__Pseudomonadota;c__Gammaproteobacteria;o__Xanthomonadales;f__Xanthomonadaceae;g__Pseudoxanthomonas_A;s__Unclassified	682	1663715	9388	2428	1660	243	50.04	2.92
MAG600	d__Bacteria;p__Dormibacterota;c__Dormibacteria;o__CF-121;f__Unclassified;g__Unclassified;s__Unclassified	682	2197805	21033	3504	1906	231	56.38	2.68
MAG326	d__Bacteria;p__Eremiobacterota;c__Eremiobacteria;o__Baltobacterales;f__Baltobacteraceae;g__Unclassified;s__Unclassified	681	2696074	19532	4985	1999	267	82.92	2.22
MAG1007	d__Bacteria;p__Pseudomonadota;c__Gammaproteobacteria;o__Pseudomonadales;f__Pseudomonadaceae;g__Stutzerimonas;s__Stutzerimonas stutzeri_AK	681	2979817	22817	5245	2381	272	75.05	2.16
MAG881	d__Bacteria;p__Actinomycetota;c__Actinomycetia;o__Actinomycetales;f__Micrococcaceae;g__Nesterenkonia;s__Unclassified	681	1930783	20774	3431	1424	252	63.48	3.53
MAG204	d__Bacteria;p__Pseudomonadota;c__Gammaproteobacteria;o__Steroidobacterales;f__Steroidobacteraceae;g__SCUD01;s__Unclassified	681	1918384	14467	2866	1717	247	51.66	6.74
MAG888	d__Bacteria;p__Pseudomonadota;c__Alphaproteobacteria;o__Rhizobiales;f__Xanthobacteraceae;g__Bradyrhizobium;s__Unclassified	680	3817678	38110	7100	2870	275	82.31	1.3
MAG1117	d__Bacteria;p__Verrucomicrobiota;c__Verrucomicrobiae;o__Chthoniobacterales;f__UBA10450;g__AV80;s__Unclassified	680	3231701	22108	5539	2671	297	83.46	1.36
MAG354	d__Bacteria;p__Pseudomonadota;c__Gammaproteobacteria;o__Burkholderiales;f__Burkholderiaceae_B;g__Ramlibacter;s__Unclassified	680	3154305	25323	6000	2315	266	71.61	1.57
MAG1070	d__Bacteria;p__Actinomycetota;c__Thermoleophilia;o__Solirubrobacterales;f__70-9;g__VAYN01;s__Unclassified	680	1352625	7141	2081	1241	217	50.63	2.87
MAG623	d__Bacteria;p__Actinomycetota;c__Actinomycetia;o__Actinomycetales;f__Microbacteriaceae;g__Leucobacter;s__Unclassified	679	2641978	26009	4442	1997	275	80.6	4.22
MAG690	d__Bacteria;p__Actinomycetota;c__Thermoleophilia;o__Gaiellales;f__Gaiellaceae;g__GMQP-bins7;s__Unclassified	677	1829601	12752	2746	1709	236	63.68	5.87
MAG263	d__Bacteria;p__Acidobacteriota;c__Thermoanaerobaculia;o__Gp7-AA8;f__Gp7-AA8;g__JAENWF01;s__Unclassified	676	4124555	35579	7553	3034	299	79.88	9.7
MAG780	d__Bacteria;p__Acidobacteriota;c__Blastocatellia;o__Pyrinomonadales;f__Pyrinomonadaceae;g__UBA11740;s__Unclassified	675	2565054	16440	4797	1982	284	65.58	0.77
MAG767	d__Bacteria;p__Pseudomonadota;c__Gammaproteobacteria;o__Burkholderiales;f__Burkholderiaceae_B;g__Ramlibacter;s__Unclassified	673	3131102	24407	5879	2361	264	69.86	3.07
MAG1028	d__Bacteria;p__Actinomycetota;c__Actinomycetia;o__Actinomycetales;f__Micrococcaceae;g__Glutamicibacter;s__Glutamicibacter nicotianae	673	2628325	58285	5912	1651	262	76.46	2.66
MAG1126	d__Bacteria;p__Chloroflexota;c__Limnocylindria;o__Limnocylindrales;f__CSP1-4;g__SPCO01;s__Unclassified	668	2315407	21278	3967	1889	265	63.35	2.41
MAG168	d__Bacteria;p__Actinomycetota;c__Acidimicrobiia;o__Acidimicrobiales;f__AC-14;g__CADCTB01;s__Unclassified	667	3505588	30046	6969	2457	264	70.59	7.75
MAG428	d__Bacteria;p__Actinomycetota;c__Actinomycetia;o__Actinomycetales;f__Microbacteriaceae;g__Microbacterium;s__Unclassified	666	1626144	16177	2787	1286	252	52.06	4.3
MAG247	d__Bacteria;p__Pseudomonadota;c__Gammaproteobacteria;o__Burkholderiales;f__Nitrosomonadaceae;g__Nitrosospira;s__Nitrosospira multiformis_D	666	1882352	14435	3012	1648	249	78.12	3.19
MAG822	d__Bacteria;p__Actinomycetota;c__Actinomycetia;o__Actinomycetales;f__Micrococcaceae;g__Kocuria;s__Unclassified	664	2027742	14652	3252	1789	271	67.1	1.31
MAG58	d__Bacteria;p__Pseudomonadota;c__Alphaproteobacteria;o__Sphingomonadales;f__Sphingomonadaceae;g__Allosphingosinicella;s__Unclassified	664	2453834	16630	4284	2002	248	76.95	2.84
MAG604	d__Bacteria;p__Pseudomonadota;c__Alphaproteobacteria;o__Sphingomonadales;f__Sphingomonadaceae;g__Sphingorhabdus_B;s__Unclassified	664	2491503	14573	4348	1979	257	73.63	3.14
MAG911	d__Bacteria;p__Actinomycetota;c__Actinomycetia;o__Actinomycetales;f__Cellulomonadaceae;g__Timonella;s__Unclassified	662	2220052	27475	4472	1474	263	82.06	2.73
MAG1136	d__Bacteria;p__Actinomycetota;c__Actinomycetia;o__Actinomycetales;f__Dermabacteraceae;g__Brachybacterium;s__Brachybacterium rhamnosum	661	2931090	38629	5680	2162	282	81.22	4.16
MAG295	d__Archaea;p__Thermoproteota;c__Nitrososphaeria;o__Nitrososphaerales;f__Nitrososphaeraceae;g__Nitrosocosmicus;s__Nitrosocosmicus oleophilus	661	2422131	26357	4205	1951	204	84.42	1.84
MAG187	d__Bacteria;p__Actinomycetota;c__Actinomycetia;o__Propionibacteriales;f__Propionibacteriaceae;g__Luteococcus;s__Luteococcus japonicus	661	1824735	10200	2856	1722	248	54.39	1.43
MAG48	d__Bacteria;p__Actinomycetota;c__Actinomycetia;o__Actinomycetales;f__Dermabacteraceae;g__Brachybacterium;s__Unclassified	659	3986409	83363	8431	2585	301	86.67	3.47
MAG413	d__Archaea;p__Thermoproteota;c__Nitrososphaeria;o__Nitrososphaerales;f__Nitrososphaeraceae;g__TH1177;s__Unclassified	659	1497355	6223	2274	1608	203	56.5	4.63
MAG228	d__Bacteria;p__Patescibacteria;c__Saccharimonadia;o__Saccharimonadales;f__Unclassified;g__Unclassified;s__Unclassified	658	1442026	9568	2498	1197	200	66.99	4.12
MAG513	d__Bacteria;p__Bacteroidota;c__Bacteroidia;o__Chitinophagales;f__Chitinophagaceae;g__Flavisolibacter;s__Unclassified	657	4111204	34551	8160	3112	306	87.99	0.42
MAG477	d__Bacteria;p__Actinomycetota;c__Acidimicrobiia;o__Acidimicrobiales;f__AC-14;g__CADCTB01;s__Unclassified	657	3457184	18519	5738	3247	248	58.07	7.04
MAG790	d__Bacteria;p__Deinococcota;c__Deinococci;o__Deinococcales;f__Deinococcaceae;g__Deinococcus;s__Unclassified	654	2629817	22473	5333	1956	264	70.51	1.08
MAG304	d__Bacteria;p__Dormibacterota;c__Dormibacteria;o__CF-121;f__CF-121;g__CF-13;s__Unclassified	654	2094175	14104	3558	1856	244	61.24	1.07
MAG383	d__Bacteria;p__Pseudomonadota;c__Gammaproteobacteria;o__Pseudomonadales;f__Moraxellaceae;g__Acinetobacter;s__Acinetobacter pseudolwoffii	653	1864144	15190	3446	1444	242	64.92	1.29
MAG880	d__Bacteria;p__Bacteroidota;c__Bacteroidia;o__Chitinophagales;f__Chitinophagaceae;g__Hanamia;s__Unclassified	653	2835473	25431	6205	2019	295	64.89	0.56
MAG947	d__Bacteria;p__Bacillota;c__Bacilli;o__Bacillales;f__Planococcaceae;g__Sporosarcina;s__Unclassified	653	1959033	25618	4018	1446	245	67.12	2.04
MAG657	d__Bacteria;p__Actinomycetota;c__Actinomycetia;o__Mycobacteriales;f__Mycobacteriaceae;g__Mycobacterium;s__Unclassified	649	3408577	29886	7315	2593	271	54.66	1.69
MAG1075	d__Bacteria;p__Chloroflexota;c__Limnocylindria;o__Limnocylindrales;f__CSP1-4;g__SPCO01;s__Unclassified	647	2468582	14426	4386	2025	265	73.29	1.56
MAG1132	d__Bacteria;p__Actinomycetota;c__Thermoleophilia;o__Solirubrobacterales;f__70-9;g__RHKX01;s__Unclassified	647	2060584	16535	3534	1825	256	76.98	4.27
MAG307	d__Bacteria;p__Bacteroidota;c__Bacteroidia;o__Sphingobacteriales;f__Sphingobacteriaceae;g__Sphingobacterium;s__Sphingobacterium sp020687765	646	2320744	28579	4916	1592	290	72.2	2.94
MAG999	d__Bacteria;p__Pseudomonadota;c__Gammaproteobacteria;o__Xanthomonadales;f__Rhodanobacteraceae;g__Rudaea;s__Unclassified	645	4365164	45261	9610	3034	314	91.32	1.92
MAG315	d__Bacteria;p__Actinomycetota;c__Actinomycetia;o__Actinomycetales;f__Dermabacteraceae;g__Brachybacterium;s__Brachybacterium rhamnosum	644	2947125	32769	5780	2173	287	81.96	2.77
MAG959	d__Bacteria;p__Pseudomonadota;c__Gammaproteobacteria;o__Burkholderiales;f__Usitatibacteraceae;g__Usitatibacter;s__Unclassified	642	3200964	33976	8282	2022	283	79	6.33
MAG335	d__Bacteria;p__Pseudomonadota;c__Gammaproteobacteria;o__Burkholderiales;f__SG8-39;g__SCGC-AG-212-J23;s__Unclassified	640	2942951	27708	5344	2645	260	82.99	1.78
MAG749	d__Bacteria;p__Pseudomonadota;c__Gammaproteobacteria;o__Xanthomonadales;f__Xanthomonadaceae;g__Luteimonas_D;s__Luteimonas_D sp016615955	639	1688871	16196	3186	1413	252	51.67	2.46
MAG977	d__Bacteria;p__Actinomycetota;c__Thermoleophilia;o__Solirubrobacterales;f__70-9;g__VAYN01;s__Unclassified	638	1889021	11920	3179	1796	241	59.89	1.89
MAG117	d__Bacteria;p__Pseudomonadota;c__Alphaproteobacteria;o__Sphingomonadales;f__Sphingomonadaceae;g__Sphingomonas;s__Unclassified	637	1903745	17574	3219	1777	240	61.24	2
MAG436	d__Archaea;p__Thermoproteota;c__Nitrososphaeria;o__Nitrososphaerales;f__Nitrososphaeraceae;g__Nitrosocosmicus;s__Nitrosocosmicus oleophilus	636	2722775	32387	5996	2056	205	90.12	0.56
MAG73	d__Bacteria;p__Actinomycetota;c__Actinomycetia;o__Actinomycetales;f__Micrococcaceae;g__Arthrobacter;s__Arthrobacter luteus_A	636	3218359	55412	6470	2374	280	86.07	0.43
MAG916	d__Bacteria;p__Bacteroidota;c__Bacteroidia;o__Chitinophagales;f__Chitinophagaceae;g__Niabella;s__Niabella sp023423285	631	2161203	16557	3806	2008	276	68.97	1.24
MAG240	d__Bacteria;p__Actinomycetota;c__Acidimicrobiia;o__IMCC26256;f__JACDBD01;g__JACDBD01;s__Unclassified	630	2660109	38139	5173	2118	256	78.57	2.86
MAG509	d__Bacteria;p__Actinomycetota;c__Actinomycetia;o__JAJZTN01;f__JAJZTN01;g__Unclassified;s__Unclassified	629	3089641	38545	5945	2387	281	73.27	2.58
MAG227	d__Bacteria;p__Chloroflexota;c__Limnocylindria;o__Limnocylindrales;f__CSP1-4;g__Unclassified;s__Unclassified	629	2096898	14964	3812	1916	257	58.74	0.86
MAG986	d__Bacteria;p__Gemmatimonadota;c__Gemmatimonadetes;o__Gemmatimonadales;f__Gemmatimonadaceae;g__JABFXC01;s__Unclassified	627	2748413	18046	4878	2486	290	79.82	3.15
MAG961	d__Bacteria;p__Pseudomonadota;c__Gammaproteobacteria;o__Burkholderiales;f__SG8-39;g__SCGC-AG-212-J23;s__Unclassified	627	3246583	32079	6203	2711	265	91.01	1.81
MAG323	d__Bacteria;p__Actinomycetota;c__Actinomycetia;o__Actinomycetales;f__JAHECE01;g__JAHECE01;s__Unclassified	627	2649830	19844	5181	2127	283	82.51	4.37
MAG943	d__Bacteria;p__Actinomycetota;c__Actinomycetia;o__Propionibacteriales;f__Propionibacteriaceae;g__Microlunatus;s__Unclassified	626	3555013	45399	7880	2572	291	78.94	0.54
MAG864	d__Bacteria;p__Bacteroidota;c__Bacteroidia;o__Cytophagales;f__Hymenobacteraceae;g__Hymenobacter;s__Unclassified	626	3721012	25901	8361	2819	282	73.52	0.95
MAG772	d__Bacteria;p__Gemmatimonadota;c__Gemmatimonadetes;o__Gemmatimonadales;f__GWC2-71-9;g__Unclassified;s__Unclassified	626	2185621	22749	4294	1791	275	62.84	5.81
MAG920	d__Bacteria;p__Pseudomonadota;c__Gammaproteobacteria;o__Pseudomonadales;f__Moraxellaceae;g__Acinetobacter;s__Unclassified	625	2877915	36152	6724	2048	281	81.83	3.56
MAG547	d__Bacteria;p__Actinomycetota;c__Actinomycetia;o__Actinomycetales;f__Brevibacteriaceae;g__Brevibacterium;s__Brevibacterium aurantiacum	625	3360509	48826	7737	2448	288	75.54	9.77
MAG996	d__Bacteria;p__Acidobacteriota;c__Vicinamibacteria;o__Vicinamibacterales;f__2-12-FULL-66-21;g__JACCXG01;s__Unclassified	624	5385842	45860	12253	4097	333	87.68	2.76
MAG439	d__Bacteria;p__Nitrospirota;c__Nitrospiria;o__Nitrospirales;f__Nitrospiraceae;g__Nitrospira_C;s__Unclassified	624	3064104	27054	6090	2556	252	82.72	1.82
MAG845	d__Bacteria;p__Actinomycetota;c__Actinomycetia;o__Actinomycetales;f__Micrococcaceae;g__Arthrobacter;s__Arthrobacter oxydans	623	3601792	72888	7663	2843	290	84.61	1.92
MAG358	d__Bacteria;p__Bacteroidota;c__Bacteroidia;o__Chitinophagales;f__Chitinophagaceae;g__Flavisolibacter;s__Unclassified	623	2766276	25477	5170	2482	297	69.55	1.24
MAG337	d__Bacteria;p__Bacteroidota;c__Bacteroidia;o__Sphingobacteriales;f__Sphingobacteriaceae;g__Sphingobacterium;s__Sphingobacterium sp020687765	623	2339374	29214	5353	1583	300	65.12	1.5
MAG791	d__Bacteria;p__Pseudomonadota;c__Alphaproteobacteria;o__Sphingomonadales;f__Sphingomonadaceae;g__Allosphingosinicella;s__Unclassified	622	2403030	16341	4522	2141	250	84.36	2.87
MAG6	d__Bacteria;p__Actinomycetota;c__Actinomycetia;o__Actinomycetales;f__Microbacteriaceae;g__Leucobacter;s__Unclassified	622	1895131	15833	3195	1780	266	55.64	5.42
MAG848	d__Bacteria;p__Pseudomonadota;c__Gammaproteobacteria;o__Xanthomonadales;f__Rhodanobacteraceae;g__66-474;s__Unclassified	622	2150569	24610	4484	1610	271	55.15	4.24
MAG1055	d__Bacteria;p__Bacillota;c__Bacilli;o__Staphylococcales;f__Salinicoccaceae;g__Jeotgalicoccus;s__Unclassified	621	1881808	21299	3696	1498	248	75.77	8.93
MAG722	d__Bacteria;p__Pseudomonadota;c__Alphaproteobacteria;o__Sphingomonadales;f__Sphingomonadaceae;g__Sphingomicrobium;s__Unclassified	621	2118924	39433	3873	1832	260	65.54	8.55
MAG377	d__Bacteria;p__Actinomycetota;c__Actinomycetia;o__Mycobacteriales;f__Mycobacteriaceae;g__Corynebacterium;s__Unclassified	620	3671110	119048	22378	1771	264	95.67	2.8
MAG504	d__Bacteria;p__Patescibacteria;c__Microgenomatia;o__Levybacterales;f__UBA12049;g__PRDT01;s__Unclassified	617	1302886	8335	2330	1200	212	69.44	2.73
MAG195	d__Bacteria;p__Nitrospirota;c__Nitrospiria;o__Nitrospirales;f__Nitrospiraceae;g__Nitrospira_F;s__Unclassified	616	1930618	12062	3370	1947	250	67.01	3.55
MAG793	d__Archaea;p__Thermoproteota;c__Nitrososphaeria;o__Nitrososphaerales;f__Nitrososphaeraceae;g__Nitrosocosmicus;s__Nitrosocosmicus oleophilus	616	2241677	18188	4152	2007	191	71.16	0.54
MAG732	d__Bacteria;p__Pseudomonadota;c__Alphaproteobacteria;o__Sphingomonadales;f__Sphingomonadaceae;g__Sphingomicrobium;s__Unclassified	616	2037029	16112	4707	1492	251	73.8	5.22
MAG1053	d__Archaea;p__Thermoproteota;c__Nitrososphaeria;o__Nitrososphaerales;f__Nitrososphaeraceae;g__Nitrosocosmicus;s__Nitrosocosmicus oleophilus	615	2681970	24777	5687	2139	205	88.25	0.74
MAG615	d__Bacteria;p__Actinomycetota;c__Actinomycetia;o__Actinomycetales;f__Dermatophilaceae;g__Ornithinicoccus;s__Ornithinicoccus ciconiae	615	2955022	34662	6010	2521	287	82.36	0.51
MAG587	d__Bacteria;p__Myxococcota;c__Polyangia;o__Fen-1088;f__Fen-1088;g__FEN-1088;s__Unclassified	615	5464811	37352	11232	4436	330	90.82	5.3
MAG301	d__Bacteria;p__Actinomycetota;c__Thermoleophilia;o__Solirubrobacterales;f__70-9;g__Unclassified;s__Unclassified	614	2088634	15176	3743	1902	257	64.21	4
MAG1036	d__Bacteria;p__Pseudomonadota;c__Gammaproteobacteria;o__Burkholderiales;f__Casimicrobiaceae;g__VBCG01;s__Unclassified	612	3369640	26641	6420	3036	287	72.27	0.46
MAG532	d__Bacteria;p__Actinomycetota;c__Thermoleophilia;o__Solirubrobacterales;f__Solirubrobacteraceae;g__Baekduia;s__Unclassified	611	4225026	37196	8829	3588	282	88.65	0.42
MAG410	d__Bacteria;p__Pseudomonadota;c__Gammaproteobacteria;o__Steroidobacterales;f__Steroidobacteraceae;g__RPQJ01;s__Unclassified	611	3404704	29270	6699	2984	298	85.84	0.48
MAG452	d__Bacteria;p__Actinomycetota;c__Actinomycetia;o__Actinomycetales;f__Dermabacteraceae;g__Brachybacterium;s__Brachybacterium rhamnosum	610	2086627	11210	3832	1948	272	55.03	3.77
MAG919	d__Bacteria;p__Actinomycetota;c__Actinomycetia;o__Actinomycetales;f__Microbacteriaceae;g__Leucobacter;s__Unclassified	609	2527975	27861	5250	2140	286	82.54	8.48
MAG462	d__Bacteria;p__Pseudomonadota;c__Gammaproteobacteria;o__Pseudomonadales;f__Moraxellaceae;g__Acinetobacter;s__Acinetobacter pseudolwoffii	607	1575918	17510	2914	1373	243	56.01	0.83
MAG696	d__Bacteria;p__Bacillota;c__Bacilli;o__Lactobacillales;f__Lactobacillaceae;g__Limosilactobacillus;s__Limosilactobacillus sp002299975	606	1418835	11750	2649	1250	241	83.24	6.88
MAG349	d__Bacteria;p__Actinomycetota;c__Actinomycetia;o__Actinomycetales;f__Microbacteriaceae;g__Curtobacterium;s__Curtobacterium sp002412165	606	2372610	19576	4797	1987	269	59.62	1.99
MAG86	d__Bacteria;p__Actinomycetota;c__Actinomycetia;o__Actinomycetales;f__Microbacteriaceae;g__Microbacterium;s__Microbacterium pullistercoris	604	2120777	14504	4036	1908	270	75.05	5.34
MAG828	d__Bacteria;p__Pseudomonadota;c__Alphaproteobacteria;o__Sphingomonadales;f__Sphingomonadaceae;g__Sphingomicrobium;s__Unclassified	604	1716661	18362	3351	1438	237	55.66	0.95
MAG865	d__Bacteria;p__Actinomycetota;c__Actinomycetia;o__Actinomycetales;f__Brevibacteriaceae;g__Brevibacterium;s__Brevibacterium intestinigallinarum	603	2628586	42850	6155	1856	294	82.62	3.94
MAG708	d__Bacteria;p__Actinomycetota;c__Actinomycetia;o__Actinomycetales;f__Dermatophilaceae;g__Janibacter;s__Unclassified	603	2604753	30994	5650	2075	271	78.99	4.38
MAG1067	d__Bacteria;p__Pseudomonadota;c__Gammaproteobacteria;o__Xanthomonadales;f__Xanthomonadaceae;g__Pseudoxanthomonas_A;s__Unclassified	603	2702705	20786	4935	2661	276	72.46	0.79
MAG714	d__Bacteria;p__Pseudomonadota;c__Alphaproteobacteria;o__Rhodobacterales;f__Rhodobacteraceae;g__Paracoccus;s__Unclassified	601	2007308	14106	4005	1770	254	76.21	3.52
MAG607	d__Bacteria;p__Actinomycetota;c__Actinomycetia;o__Mycobacteriales;f__Mycobacteriaceae;g__Dietzia;s__Unclassified	598	2897800	32802	6231	2298	281	81.97	4.46
MAG230	d__Bacteria;p__Actinomycetota;c__Actinomycetia;o__Mycobacteriales;f__Mycobacteriaceae;g__Dietzia;s__Unclassified	598	2255665	22693	5239	1697	272	55.38	5.25
MAG991	d__Bacteria;p__Bacteroidota;c__Bacteroidia;o__Chitinophagales;f__Chitinophagaceae;g__Hanamia;s__Unclassified	598	3421948	35579	6648	3043	304	76.56	1.82
MAG1097	d__Bacteria;p__Actinomycetota;c__Actinomycetia;o__Actinomycetales;f__Micrococcaceae;g__Arthrobacter_H;s__Arthrobacter_H sp016892645	597	2147496	16299	3959	2024	264	56.36	1.33
MAG200	d__Bacteria;p__Actinomycetota;c__Actinomycetia;o__Mycobacteriales;f__Mycobacteriaceae;g__Dietzia;s__Dietzia aerolata	597	2816941	41230	7587	1880	283	73.42	1.52
MAG608	d__Bacteria;p__Gemmatimonadota;c__Gemmatimonadetes;o__Gemmatimonadales;f__Gemmatimonadaceae;g__JABFXC01;s__Unclassified	596	3802675	92206	11616	2573	305	78.71	8.58
MAG1131	d__Bacteria;p__Actinomycetota;c__Acidimicrobiia;o__Acidimicrobiales;f__AC-14;g__CADCTB01;s__Unclassified	596	3158507	31074	6782	2541	264	75.5	1.07
MAG679	d__Bacteria;p__Bacteroidota;c__Bacteroidia;o__Chitinophagales;f__Chitinophagaceae;g__Hanamia;s__Unclassified	592	4330521	44977	9753	3429	306	89.21	1.22
MAG549	d__Bacteria;p__Eremiobacterota;c__Eremiobacteria;o__Baltobacterales;f__Baltobacteraceae;g__Unclassified;s__Unclassified	591	2767597	24890	5716	2372	274	85.78	3.66
MAG448	d__Bacteria;p__Bacteroidota;c__Bacteroidia;o__Flavobacteriales;f__Weeksellaceae;g__Planobacterium;s__Unclassified	591	1224164	10251	2207	1221	242	53.84	0.49
MAG692	d__Bacteria;p__Myxococcota;c__Myxococcia;o__Myxococcales;f__40CM-4-68-19;g__Unclassified;s__Unclassified	591	3988756	33453	8081	3470	317	70.46	6.9
MAG609	d__Bacteria;p__Actinomycetota;c__Actinomycetia;o__Mycobacteriales;f__Antricoccaceae;g__Unclassified;s__Unclassified	590	3178495	36250	6940	2692	285	79.81	5.97
MAG982	d__Bacteria;p__Actinomycetota;c__Actinomycetia;o__Actinomycetales;f__Microbacteriaceae;g__Microbacterium;s__Microbacterium sp003293595	590	2623436	21492	5552	2175	285	79.61	0.98
MAG472	d__Bacteria;p__Actinomycetota;c__Actinomycetia;o__Actinomycetales;f__Dermabacteraceae;g__Brachybacterium;s__Brachybacterium sp012799425	590	2940928	38813	7486	2335	298	81.65	2.9
MAG83	d__Bacteria;p__Actinomycetota;c__Actinomycetia;o__Actinomycetales;f__Micrococcaceae;g__Arthrobacter;s__Unclassified	590	2868943	41159	6720	2278	269	72.78	3.38
MAG563	d__Bacteria;p__Actinomycetota;c__Actinomycetia;o__Actinomycetales;f__Microbacteriaceae;g__Curtobacterium;s__Curtobacterium sp002412165	589	2441069	15895	5057	2123	271	63.93	1.17
MAG724	d__Bacteria;p__Bacillota;c__Bacilli;o__Haloplasmatales;f__Turicibacteraceae;g__Turicibacter;s__Unclassified	587	1972203	20396	3690	1928	242	59.5	6.31
MAG1089	d__Bacteria;p__Actinomycetota;c__Thermoleophilia;o__Gaiellales;f__Gaiellaceae;g__JACCRW01;s__Unclassified	587	2031713	16690	4750	1645	252	66.36	1.3
MAG949	d__Bacteria;p__Bacillota_A;c__Clostridia;o__Lachnospirales;f__Lachnospiraceae;g__Blautia_A;s__Blautia_A sp000285855	586	2479257	32070	4784	2134	271	71.28	6.18
MAG9	d__Bacteria;p__Bacteroidota;c__Bacteroidia;o__Chitinophagales;f__Chitinophagaceae;g__Hanamia;s__Unclassified	583	2821095	29715	5968	2419	286	93.95	2.69
MAG619	d__Bacteria;p__Pseudomonadota;c__Gammaproteobacteria;o__Burkholderiales;f__Burkholderiaceae_B;g__Ramlibacter;s__Unclassified	583	3782334	35274	8492	3203	289	94.44	0.76
MAG464	d__Bacteria;p__Pseudomonadota;c__Alphaproteobacteria;o__Sphingomonadales;f__Sphingomonadaceae;g__Allosphingosinicella;s__Unclassified	582	2690669	28534	5646	2368	262	82.1	3.46
MAG966	d__Bacteria;p__Pseudomonadota;c__Gammaproteobacteria;o__Pseudomonadales;f__Cellvibrionaceae;g__Cellvibrio;s__Unclassified	582	2432168	25881	5197	2176	277	88.92	1.62
MAG394	d__Bacteria;p__Actinomycetota;c__Actinomycetia;o__Actinomycetales;f__Microbacteriaceae;g__Amnibacterium;s__Unclassified	582	1950263	13454	3683	1840	255	58.42	3.43
MAG89	d__Bacteria;p__Pseudomonadota;c__Gammaproteobacteria;o__Xanthomonadales;f__Xanthomonadaceae;g__Arenimonas;s__Unclassified	582	1336974	8631	2276	1596	245	57.28	3.92
MAG885	d__Bacteria;p__Actinomycetota;c__Actinomycetia;o__Actinomycetales;f__Dermatophilaceae;g__Flexivirga;s__Unclassified	582	2303788	36423	4447	2011	271	61.65	1.87
MAG197	d__Bacteria;p__Bacillota;c__Bacilli;o__Staphylococcales;f__Staphylococcaceae;g__Mammaliicoccus;s__Mammaliicoccus sciuri	581	1471545	8410	2528	1660	219	56.98	5.32
MAG594	d__Archaea;p__Thermoproteota;c__Nitrososphaeria;o__Nitrososphaerales;f__Nitrosopumilaceae;g__Nitrosotenuis;s__Nitrosotenuis sp021824845	580	850490	6009	1441	1067	177	54.28	5.4
MAG555	d__Bacteria;p__Nitrospirota;c__Nitrospiria;o__Nitrospirales;f__Nitrospiraceae;g__Nitrospira_F;s__Unclassified	579	3545712	36428	8286	2859	264	88.18	8.19
MAG824	d__Bacteria;p__Actinomycetota;c__Actinomycetia;o__Mycobacteriales;f__Mycobacteriaceae;g__Corynebacterium;s__Unclassified	579	2209358	21025	4363	2016	268	77.2	0.4
MAG397	d__Bacteria;p__Actinomycetota;c__Actinomycetia;o__Propionibacteriales;f__Nocardioidaceae;g__Aeromicrobium;s__Unclassified	579	2514680	21230	5540	2130	273	70.27	6.13
MAG27	d__Bacteria;p__Actinomycetota;c__Actinomycetia;o__Actinomycetales;f__Cellulomonadaceae;g__Jonesia;s__Unclassified	578	2603370	21961	5709	2307	279	77.59	1.61
MAG1061	d__Bacteria;p__Actinomycetota;c__Actinomycetia;o__Propionibacteriales;f__Propionibacteriaceae;g__Microlunatus;s__Unclassified	578	2969534	23603	5426	3316	280	52.45	2.97
MAG408	d__Bacteria;p__Bacteroidota;c__Bacteroidia;o__Chitinophagales;f__Chitinophagaceae;g__Flavisolibacter;s__Unclassified	577	5152912	45753	12343	4198	324	91.71	1.39
MAG404	d__Bacteria;p__Gemmatimonadota;c__Gemmatimonadetes;o__Gemmatimonadales;f__Gemmatimonadaceae;g__JABFXC01;s__Unclassified	577	3008018	40702	7759	2329	300	73.98	4.19
MAG784	d__Bacteria;p__Acidobacteriota;c__Vicinamibacteria;o__Vicinamibacterales;f__2-12-FULL-66-21;g__JACDCA01;s__Unclassified	576	5041368	53121	12320	3932	329	92.44	4.37
MAG20	d__Bacteria;p__Nitrospirota;c__Nitrospiria;o__Nitrospirales;f__Nitrospiraceae;g__Nitrospira_F;s__Unclassified	576	3243764	31720	6988	2715	263	87.56	0.4
MAG685	d__Bacteria;p__Deinococcota;c__Deinococci;o__Deinococcales;f__Trueperaceae;g__Unclassified;s__Unclassified	575	1226256	12699	2309	1224	234	80.2	1.91
MAG126	d__Bacteria;p__Nitrospirota;c__Nitrospiria;o__Nitrospirales;f__Nitrospiraceae;g__Nitrospira_F;s__Unclassified	575	1710720	13483	3229	1818	237	58.46	1.79
MAG1104	d__Bacteria;p__Pseudomonadota;c__Alphaproteobacteria;o__Rhodobacterales;f__Rhodobacteraceae;g__Paracoccus;s__Paracoccus sp002359815	575	3055456	32978	6309	2688	263	76.96	8.9
MAG644	d__Bacteria;p__Pseudomonadota;c__Gammaproteobacteria;o__Pseudomonadales;f__Halomonadaceae;g__Halomonas;s__Unclassified	575	2983196	35506	6047	2671	274	62.57	7.62
MAG1042	d__Bacteria;p__Actinomycetota;c__Acidimicrobiia;o__Acidimicrobiales;f__JAFATL01;g__JAFATL01;s__Unclassified	574	3993292	44549	9084	3324	282	90.92	4.21
MAG10	d__Bacteria;p__Actinomycetota;c__Actinomycetia;o__Actinomycetales;f__Actinomycetaceae;g__Flaviflexus;s__Unclassified	574	1705186	21070	3831	1469	256	72.54	1.36
MAG687	d__Bacteria;p__Acidobacteriota;c__Vicinamibacteria;o__Vicinamibacterales;f__2-12-FULL-66-21;g__JACCXG01;s__Unclassified	571	5070915	65127	13076	4304	339	97.28	1.6
MAG287	d__Bacteria;p__Actinomycetota;c__Thermoleophilia;o__Solirubrobacterales;f__70-9;g__VAYN01;s__Unclassified	571	2026923	15880	4337	1920	251	79.18	3.31
MAG329	d__Bacteria;p__Bacillota;c__Bacilli;o__Lactobacillales;f__Enterococcaceae;g__Enterococcus_I;s__Unclassified	571	1642843	18830	3551	1412	256	78.74	8.98
MAG381	d__Bacteria;p__Acidobacteriota;c__Blastocatellia;o__Pyrinomonadales;f__Pyrinomonadaceae;g__OLB17;s__Unclassified	570	3359593	38380	7550	2904	272	84.53	3.56
MAG431	d__Bacteria;p__Pseudomonadota;c__Gammaproteobacteria;o__Pseudomonadales;f__Pseudomonadaceae;g__Thiopseudomonas;s__Thiopseudomonas sp012518175	569	2046440	32819	4880	1637	270	84	2.27
MAG1027	d__Bacteria;p__Pseudomonadota;c__Gammaproteobacteria;o__Burkholderiales;f__Burkholderiaceae_C;g__SCQX01;s__Unclassified	568	2846590	28337	6220	2589	280	72.16	5.22
MAG162	d__Bacteria;p__Pseudomonadota;c__Gammaproteobacteria;o__Xanthomonadales;f__Rhodanobacteraceae;g__Oleiagrimonas;s__Unclassified	567	2039226	15054	3991	2042	275	69.38	2.24
MAG994	d__Bacteria;p__Pseudomonadota;c__Gammaproteobacteria;o__Xanthomonadales;f__Rhodanobacteraceae;g__Rhodanobacter;s__Unclassified	566	2223450	26214	4448	2089	270	64.56	2.84
MAG202	d__Bacteria;p__Actinomycetota;c__Actinomycetia;o__Actinomycetales;f__Dermatophilaceae;g__Terrabacter;s__Unclassified	562	3741746	44311	7530	3676	284	69.43	5.61
MAG1105	d__Bacteria;p__Actinomycetota;c__Actinomycetia;o__Propionibacteriales;f__Propionibacteriaceae;g__Arachnia;s__Unclassified	560	3971090	64718	10819	2968	299	86.05	4.76
MAG640	d__Bacteria;p__Bacillota;c__Bacilli;o__Bacillales;f__Planococcaceae;g__Psychrobacillus;s__Unclassified	559	3235279	39436	7341	2679	260	82.65	1.12
MAG317	d__Bacteria;p__Bacillota;c__Bacilli;o__Lactobacillales;f__Lactobacillaceae;g__Ligilactobacillus;s__Ligilactobacillus ruminis	559	1405559	12258	2809	1385	236	74.06	1.86
MAG1069	d__Bacteria;p__Pseudomonadota;c__Gammaproteobacteria;o__Xanthomonadales;f__Xanthomonadaceae;g__Lysobacter_B;s__Lysobacter_B sp011300685	558	1672448	15266	3738	1541	253	79.74	4.12
MAG104	d__Bacteria;p__Pseudomonadota;c__Gammaproteobacteria;o__Burkholderiales;f__Casimicrobiaceae;g__VBCG01;s__Unclassified	558	3989934	51548	9432	3406	300	88	1.79
MAG176	d__Bacteria;p__Actinomycetota;c__Actinomycetia;o__Actinomycetales;f__Dermatophilaceae;g__Flexivirga;s__Unclassified	558	2212389	28827	4712	1977	277	59	1.1
MAG270	d__Bacteria;p__Actinomycetota;c__Actinomycetia;o__Actinomycetales;f__Dermatophilaceae;g__Janibacter;s__Janibacter limosus	558	2077101	29395	4232	1944	273	63.28	2.67
MAG777	d__Bacteria;p__Actinomycetota;c__Actinomycetia;o__Actinomycetales;f__Micrococcaceae;g__Arthrobacter;s__Unclassified	557	2185403	27844	4350	2218	267	56.28	0.23
MAG853	d__Bacteria;p__Bacillota;c__Bacilli;o__Bacillales_K;f__Sporolactobacillaceae;g__Unclassified;s__Unclassified	557	1382278	20733	2492	1551	229	52.62	6.42
MAG871	d__Bacteria;p__Actinomycetota;c__Thermoleophilia;o__Solirubrobacterales;f__70-9;g__RHKX01;s__Unclassified	556	2461728	19853	5483	2236	265	83.38	2.99
MAG581	d__Bacteria;p__Gemmatimonadota;c__Gemmatimonadetes;o__Gemmatimonadales;f__Gemmatimonadaceae;g__JABFXC01;s__Unclassified	556	3356273	37609	8482	2811	303	73.07	2.4
MAG455	d__Bacteria;p__Pseudomonadota;c__Alphaproteobacteria;o__Sphingomonadales;f__Sphingomonadaceae;g__Allosphingosinicella;s__Unclassified	555	1806900	32724	3645	1853	245	56.83	1.96
MAG781	d__Bacteria;p__Pseudomonadota;c__Gammaproteobacteria;o__Pseudomonadales;f__Moraxellaceae;g__Acinetobacter;s__Acinetobacter harbinensis	554	1573407	17478	3569	1443	251	65.78	0.83
MAG924	d__Bacteria;p__Bacteroidota;c__Bacteroidia;o__Cytophagales;f__Cyclobacteriaceae;g__Algoriphagus;s__Unclassified	553	3792591	39347	9086	3426	310	89.82	0.05
MAG1076	d__Bacteria;p__Actinomycetota;c__Actinomycetia;o__Actinomycetales;f__Microbacteriaceae;g__Microbacterium;s__Unclassified	553	2031196	22378	4103	2033	268	68.26	0.99
MAG704	d__Bacteria;p__Bacteroidota;c__Bacteroidia;o__Chitinophagales;f__Chitinophagaceae;g__JAEWAC01;s__Unclassified	552	3311317	24414	7107	3314	293	91.62	0.51
MAG170	d__Bacteria;p__Actinomycetota;c__Thermoleophilia;o__Gaiellales;f__Gaiellaceae;g__PALSA-600;s__Unclassified	552	3142878	33986	7548	2788	262	81.07	2.86
MAG840	d__Bacteria;p__Dormibacterota;c__Dormibacteria;o__Dormibacterales;f__Dormibacteraceae;g__CF-161;s__Unclassified	550	3556235	44106	8394	3101	262	81.86	2.48
MAG416	d__Bacteria;p__Pseudomonadota;c__Gammaproteobacteria;o__Xanthomonadales;f__Xanthomonadaceae;g__Lysobacter_B;s__Lysobacter_B sp011300685	548	1288750	12914	2598	1264	240	79.29	3.97
MAG717	d__Bacteria;p__Actinomycetota;c__Actinomycetia;o__Propionibacteriales;f__Nocardioidaceae;g__Nocardioides;s__Unclassified	544	3685660	43962	9491	3033	287	89.26	1.14
MAG839	d__Bacteria;p__Bacteroidota;c__Bacteroidia;o__Flavobacteriales;f__Weeksellaceae;g__Kaistella;s__Kaistella beijingensis	544	1442129	16688	2642	1681	243	56.36	3.39
MAG764	d__Bacteria;p__Bacillota;c__Bacilli;o__Staphylococcales;f__Salinicoccaceae;g__Jeotgalicoccus;s__Jeotgalicoccus coquinae	543	1774125	21409	4212	1548	244	89.16	3.18
MAG580	d__Bacteria;p__Actinomycetota;c__Actinomycetia;o__Actinomycetales;f__Dermatophilaceae;g__Kineosphaera;s__Unclassified	543	3937973	63978	11857	2968	298	81.38	5.5
MAG1017	d__Bacteria;p__Pseudomonadota;c__Gammaproteobacteria;o__Pseudomonadales;f__Moraxellaceae;g__Acinetobacter;s__Acinetobacter pseudolwoffii	542	2268326	22484	5241	2079	261	82.35	2.2
MAG1133	d__Bacteria;p__Actinomycetota;c__Actinomycetia;o__Actinomycetales;f__Microbacteriaceae;g__Microbacterium;s__Unclassified	542	1825881	19657	3861	1870	265	57.17	3.27
MAG122	d__Bacteria;p__Pseudomonadota;c__Gammaproteobacteria;o__Xanthomonadales;f__Xanthomonadaceae;g__Lysobacter_B;s__Lysobacter_B sp011300685	541	1272655	15549	2659	1238	230	68.75	2.93
MAG127	d__Bacteria;p__Actinomycetota;c__Actinomycetia;o__Mycobacteriales;f__Mycobacteriaceae;g__Corynebacterium;s__Corynebacterium stationis	540	1912240	19946	4508	1764	266	75.47	3.82
MAG553	d__Bacteria;p__Actinomycetota;c__Actinomycetia;o__Actinomycetales;f__Micrococcaceae;g__Kocuria;s__Unclassified	540	2239838	25792	4917	2270	286	75.83	4.43
MAG31	d__Bacteria;p__Actinomycetota;c__Actinomycetia;o__Actinomycetales;f__Microbacteriaceae;g__Agrococcus;s__Agrococcus casei	540	1449143	13096	2925	1572	246	66.54	1.57
MAG805	d__Bacteria;p__Actinomycetota;c__Actinomycetia;o__Actinomycetales;f__Microbacteriaceae;g__Agromyces;s__Unclassified	540	2799369	25545	6489	2646	280	72.56	2.66
MAG927	d__Bacteria;p__Actinomycetota;c__Thermoleophilia;o__Gaiellales;f__Gaiellaceae;g__GMQP-bins7;s__Unclassified	537	2279680	17612	5231	2121	259	79.43	5.61
MAG85	d__Bacteria;p__Bacteroidota;c__Bacteroidia;o__Bacteroidales;f__Dysgonomonadaceae;g__JAAYFB01;s__Unclassified	537	1827682	18214	3996	1854	282	86.39	3.06
MAG459	d__Bacteria;p__Pseudomonadota;c__Gammaproteobacteria;o__Pseudomonadales;f__Moraxellaceae;g__Acinetobacter;s__Acinetobacter pseudolwoffii	536	2349053	19122	6059	2085	262	80.92	2.91
MAG121	d__Bacteria;p__Actinomycetota;c__Actinomycetia;o__Propionibacteriales;f__Propionibacteriaceae;g__Arachnia;s__Arachnia defluvii	536	2805546	33805	6756	2641	297	78.86	8.95
MAG645	d__Bacteria;p__Actinomycetota;c__Actinomycetia;o__Propionibacteriales;f__Propionibacteriaceae;g__Raineyella;s__Unclassified	536	2290107	57064	5145	2128	279	67.68	5.19
MAG945	d__Bacteria;p__Actinomycetota;c__Actinomycetia;o__JAHEKZ01;f__JAHEKZ01;g__Unclassified;s__Unclassified	536	1297654	7792	2445	1637	240	50.74	3.07
MAG435	d__Bacteria;p__Bacteroidota;c__Bacteroidia;o__Bacteroidales;f__Dysgonomonadaceae;g__UBA2632;s__Unclassified	535	1527318	19749	3420	1360	248	56.52	1.81
MAG571	d__Bacteria;p__Pseudomonadota;c__Gammaproteobacteria;o__Xanthomonadales;f__Xanthomonadaceae;g__JACMKK01;s__Unclassified	535	1875582	15339	4074	1883	267	61.72	0.53
MAG474	d__Bacteria;p__Pseudomonadota;c__Alphaproteobacteria;o__Rhizobiales;f__Rhizobiaceae;g__Paenochrobactrum;s__Unclassified	534	2375479	19668	5125	2393	267	87.77	1.69
MAG707	d__Bacteria;p__Bacillota_A;c__Clostridia;o__Tissierellales;f__Peptoniphilaceae;g__Gallicola;s__Gallicola sp012798975	531	1637828	17519	3836	1513	248	77.04	3.47
MAG548	d__Bacteria;p__Actinomycetota;c__Thermoleophilia;o__Gaiellales;f__Gaiellaceae;g__PALSA-600;s__Unclassified	529	1844079	12389	3929	1977	243	58.61	3.36
MAG39	d__Bacteria;p__Pseudomonadota;c__Gammaproteobacteria;o__Xanthomonadales;f__Rhodanobacteraceae;g__Rhodanobacter;s__Unclassified	529	2150288	28926	4685	2085	270	60.37	1.65
MAG445	d__Bacteria;p__Actinomycetota;c__Thermoleophilia;o__Solirubrobacterales;f__70-9;g__RHKX01;s__Unclassified	528	1619924	11741	3282	1810	252	57.71	0.57
MAG157	d__Bacteria;p__Pseudomonadota;c__Alphaproteobacteria;o__Sphingomonadales;f__Sphingomonadaceae;g__Sphingomicrobium;s__Unclassified	527	2087943	23844	4844	1978	275	67.96	6.09
MAG1079	d__Bacteria;p__Acidobacteriota;c__Blastocatellia;o__Pyrinomonadales;f__Pyrinomonadaceae;g__UBA11740;s__Unclassified	527	2505844	19986	5249	2865	295	69.69	1.34
MAG1125	d__Bacteria;p__Actinomycetota;c__Thermoleophilia;o__Solirubrobacterales;f__70-9;g__Unclassified;s__Unclassified	526	2591572	24032	6440	2355	265	80.73	5.89
MAG32	d__Bacteria;p__Bacteroidota;c__Bacteroidia;o__Chitinophagales;f__Chitinophagaceae;g__JAEWAC01;s__Unclassified	526	2038049	17212	4242	2391	266	51.9	1.85
MAG1115	d__Bacteria;p__Actinomycetota;c__Actinomycetia;o__Actinomycetales;f__Micrococcaceae;g__Glutamicibacter;s__Glutamicibacter sp004320535	525	3112672	76808	12292	2130	278	82.42	6.13
MAG643	d__Bacteria;p__Pseudomonadota;c__Gammaproteobacteria;o__Xanthomonadales;f__Xanthomonadaceae;g__Unclassified;s__Unclassified	525	2208136	18265	5234	2149	273	79.13	3.09
MAG285	d__Bacteria;p__Actinomycetota;c__Thermoleophilia;o__Solirubrobacterales;f__Thermoleophilaceae;g__JAAYBF01;s__Unclassified	525	2415421	36285	5564	2364	263	64.95	1.87
MAG188	d__Bacteria;p__Actinomycetota;c__Actinomycetia;o__Mycobacteriales;f__Mycobacteriaceae;g__Corynebacterium;s__Unclassified	525	1892715	13574	4008	2061	270	66.89	0.67
MAG432	d__Bacteria;p__Pseudomonadota;c__Alphaproteobacteria;o__Rhizobiales;f__Xanthobacteraceae;g__Bradyrhizobium;s__Unclassified	523	3877472	68982	10255	3393	284	80.68	2.49
MAG955	d__Bacteria;p__Actinomycetota;c__Actinomycetia;o__Actinomycetales;f__Micrococcaceae;g__Glutamicibacter;s__Glutamicibacter mishrai	522	2202928	30246	6720	1704	284	57.86	7.57
MAG665	d__Bacteria;p__Actinomycetota;c__Actinomycetia;o__Actinomycetales;f__Dermatophilaceae;g__Ornithinicoccus;s__Unclassified	519	3334621	59668	8995	2888	289	82.92	2.82
MAG69	d__Bacteria;p__Actinomycetota;c__Thermoleophilia;o__Gaiellales;f__Gaiellaceae;g__GMQP-bins7;s__Unclassified	519	1870171	14005	4242	1929	256	64.33	3.23
MAG38	d__Bacteria;p__Actinomycetota;c__Actinomycetia;o__Actinomycetales;f__Dermatophilaceae;g__Terrabacter;s__Unclassified	517	2299532	26281	5343	2335	271	52.41	0.94
MAG269	d__Bacteria;p__Chloroflexota;c__Limnocylindria;o__P2-11E;f__P2-11E;g__CF-39;s__Unclassified	515	1775284	19907	3848	1944	248	52.49	5.79
MAG778	d__Bacteria;p__Actinomycetota;c__Actinomycetia;o__Actinomycetales;f__Dermatophilaceae;g__Flexivirga;s__Unclassified	514	2146418	30697	5135	2044	280	57.89	1.69
MAG344	d__Bacteria;p__Actinomycetota;c__Actinomycetia;o__Actinomycetales;f__Dermatophilaceae;g__F2B08;s__Unclassified	511	2280815	43526	5275	2291	281	75.84	2.93
MAG796	d__Bacteria;p__Bacteroidota;c__Bacteroidia;o__Flavobacteriales;f__Flavobacteriaceae;g__JAAYLC01;s__Unclassified	510	2286592	19533	5293	2264	277	82.12	1.95
MAG494	d__Bacteria;p__Actinomycetota;c__Actinomycetia;o__Actinomycetales;f__Dermatophilaceae;g__Phycicoccus;s__Phycicoccus jejuensis	506	2771868	34449	6241	3145	293	66.93	8.42
MAG1050	d__Bacteria;p__Pseudomonadota;c__Alphaproteobacteria;o__Sphingomonadales;f__Sphingomonadaceae;g__Allosphingosinicella;s__Unclassified	505	3744373	34805	10419	3679	288	86.63	3.59
MAG3	d__Bacteria;p__Pseudomonadota;c__Alphaproteobacteria;o__Sphingomonadales;f__Sphingomonadaceae;g__Allosphingosinicella;s__Unclassified	505	2909366	31891	7562	2733	265	79.52	3.9
MAG160	d__Bacteria;p__Actinomycetota;c__Actinomycetia;o__Propionibacteriales;f__Nocardioidaceae;g__Marmoricola;s__Unclassified	504	2718767	22197	6291	3087	276	74.6	3.09
MAG801	d__Bacteria;p__Actinomycetota;c__Actinomycetia;o__Mycobacteriales;f__Mycobacteriaceae;g__Gordonia;s__Unclassified	502	2856542	25160	7197	2771	297	73.89	3.29
MAG159	d__Bacteria;p__Actinomycetota;c__Actinomycetia;o__Actinomycetales;f__Microbacteriaceae;g__Microbacterium;s__Microbacterium sp943181415	501	2524678	25166	6481	2501	290	81.33	5.69
MAG588	d__Bacteria;p__Pseudomonadota;c__Gammaproteobacteria;o__Xanthomonadales;f__Xanthomonadaceae;g__JABFWF01;s__Unclassified	501	2050473	23347	4831	2093	269	67.39	1.54
MAG960	d__Bacteria;p__Chloroflexota;c__Limnocylindria;o__Limnocylindrales;f__CSP1-4;g__CAIXZV01;s__Unclassified	499	3349381	38071	9569	3070	291	86.89	4.87
MAG1000	d__Bacteria;p__Actinomycetota;c__Thermoleophilia;o__Gaiellales;f__Gaiellaceae;g__Palsa-739;s__Unclassified	499	1563706	11480	3526	1853	230	50.54	2.84
MAG1088	d__Bacteria;p__Dormibacterota;c__Dormibacteria;o__Dormibacterales;f__Dormibacteraceae;g__Unclassified;s__Unclassified	499	2252263	20885	5814	2265	270	73.8	7
MAG886	d__Bacteria;p__Actinomycetota;c__Actinomycetia;o__Mycobacteriales;f__Mycobacteriaceae;g__Corynebacterium;s__Corynebacterium casei	499	1281761	11125	2998	1378	258	55.2	0.88
MAG730	d__Bacteria;p__Actinomycetota;c__UBA4738;o__CADDZG01;f__WHSQ01;g__JAHWJK01;s__Unclassified	497	2543026	36605	6280	2655	271	88.01	0.15
MAG620	d__Bacteria;p__Actinomycetota;c__Thermoleophilia;o__Gaiellales;f__Gaiellaceae;g__JACCRW01;s__Unclassified	497	2101450	29718	5178	2056	258	77.36	2.96
MAG925	d__Bacteria;p__Pseudomonadota;c__Gammaproteobacteria;o__Xanthomonadales;f__Xanthomonadaceae;g__Thermomonas;s__Unclassified	497	2186688	22828	5247	2224	273	66.62	4.46
MAG502	d__Bacteria;p__Actinomycetota;c__Actinomycetia;o__Streptosporangiales;f__Streptosporangiaceae;g__Nocardiopsis;s__Nocardiopsis listeri_A	496	5268807	85033	16819	4789	313	93.08	2.33
MAG501	d__Bacteria;p__Bacteroidota;c__Bacteroidia;o__Sphingobacteriales;f__Sphingobacteriaceae;g__Unclassified;s__Unclassified	495	3207032	69694	10162	2798	305	85.79	6.15
MAG836	d__Bacteria;p__Actinomycetota;c__Actinomycetia;o__Actinomycetales;f__Microbacteriaceae;g__Microbacterium;s__Microbacterium pullistercoris	491	2286634	44839	5936	2160	279	86.67	2.76
MAG479	d__Bacteria;p__Actinomycetota;c__Actinomycetia;o__Actinomycetales;f__JAJYRW01;g__JAJYRW01;s__Unclassified	491	1844344	26731	5146	1794	265	82.17	2.56
MAG1012	d__Bacteria;p__Actinomycetota;c__Actinomycetia;o__Actinomycetales;f__Microbacteriaceae;g__Microbacterium;s__Microbacterium sp019061125	491	2086583	18900	5208	2235	275	73.07	0.72
MAG979	d__Bacteria;p__Pseudomonadota;c__Gammaproteobacteria;o__Diplorickettsiales;f__Diplorickettsiaceae;g__Aquirickettsiella;s__Unclassified	491	1262682	23849	3024	1338	247	71.92	3.38
MAG65	d__Bacteria;p__Pseudomonadota;c__Gammaproteobacteria;o__Pseudomonadales;f__Pseudomonadaceae;g__Halopseudomonas;s__Halopseudomonas excrementavium	491	2626309	38531	6844	2684	284	70.72	5.16
MAG347	d__Archaea;p__Thermoproteota;c__Nitrososphaeria;o__Nitrososphaerales;f__Nitrososphaeraceae;g__Nitrososphaera;s__Unclassified	489	683478	5246	1365	1052	202	54.16	6.85
MAG825	d__Bacteria;p__Actinomycetota;c__Actinomycetia;o__Actinomycetales;f__Micrococcaceae;g__Glutamicibacter;s__Glutamicibacter arilaitensis	488	2349020	26704	5643	2578	275	71.86	2.44
MAG794	d__Bacteria;p__Pseudomonadota;c__Gammaproteobacteria;o__Pseudomonadales;f__Pseudomonadaceae;g__Thiopseudomonas;s__Unclassified	487	2056493	28188	6035	1828	268	100	2.47
MAG682	d__Bacteria;p__Bacteroidota;c__Bacteroidia;o__Chitinophagales;f__Chitinophagaceae;g__VBAS01;s__Unclassified	487	4024202	73457	12642	3571	309	89.27	2.65
MAG422	d__Bacteria;p__Cyanobacteriota;c__Cyanobacteriia;o__Cyanobacteriales;f__Coleofasciculaceae;g__Unclassified;s__Unclassified	486	7589894	95433	22742	7555	316	100	0.18
MAG321	d__Bacteria;p__Bacillota;c__Bacilli;o__Bacillales_D;f__Amphibacillaceae;g__Virgibacillus_I;s__Unclassified	485	2800220	37196	7917	2645	264	73.88	5.2
MAG145	d__Bacteria;p__Actinomycetota;c__Thermoleophilia;o__Solirubrobacterales;f__70-9;g__RHKX01;s__Unclassified	484	1618149	16678	3762	1935	253	67.44	1.84
MAG539	d__Bacteria;p__Actinomycetota;c__Actinomycetia;o__Actinomycetales;f__Micrococcaceae;g__Arthrobacter_D;s__Arthrobacter_D subterraneus	481	2286103	63763	5990	2116	287	72.71	2.13
MAG243	d__Bacteria;p__Actinomycetota;c__Actinomycetia;o__Actinomycetales;f__Microbacteriaceae;g__Microbacterium;s__Unclassified	480	1623538	22600	3895	1930	266	51.1	0.78
MAG296	d__Bacteria;p__Actinomycetota;c__Actinomycetia;o__Actinomycetales;f__Dermatophilaceae;g__Ornithinibacter;s__Ornithinibacter sp017989115	479	2343339	27940	6302	2309	282	68.44	2.51
MAG43	d__Bacteria;p__Chloroflexota;c__Limnocylindria;o__Limnocylindrales;f__CSP1-4;g__SPCO01;s__Unclassified	478	2770229	34767	7765	2797	290	88.16	2.58
MAG466	d__Bacteria;p__Chloroflexota;c__Limnocylindria;o__Limnocylindrales;f__CSP1-4;g__SPCO01;s__Unclassified	478	2241867	19739	5393	2692	274	66.86	2.8
MAG331	d__Bacteria;p__Bacteroidota;c__Bacteroidia;o__Flavobacteriales;f__Weeksellaceae;g__Kaistella;s__Unclassified	477	1831690	21875	4572	2027	272	67.39	2.24
MAG262	d__Bacteria;p__Actinomycetota;c__Actinomycetia;o__Mycobacteriales;f__Mycobacteriaceae;g__Corynebacterium;s__Corynebacterium sp012837295	476	2208154	22156	5549	2311	285	80.26	2.35
MAG1048	d__Bacteria;p__Actinomycetota;c__Actinomycetia;o__Mycobacteriales;f__Mycobacteriaceae;g__Dietzia;s__Dietzia aerolata	476	2858682	62721	8952	2669	295	75.35	2.36
MAG782	d__Bacteria;p__Chloroflexota;c__Limnocylindria;o__QHBO01;f__QHBO01;g__JACDBZ01;s__Unclassified	476	2040754	28993	5088	2101	268	74.48	3.88
MAG1018	d__Bacteria;p__Pseudomonadota;c__Gammaproteobacteria;o__Pseudomonadales;f__Moraxellaceae;g__Acinetobacter;s__Acinetobacter bohemicus	475	2811018	33824	6965	3090	269	80.94	1.74
MAG503	d__Bacteria;p__Pseudomonadota;c__Gammaproteobacteria;o__Burkholderiales;f__Casimicrobiaceae;g__Unclassified;s__Unclassified	475	4102318	42062	10795	4644	303	85.36	1.82
MAG666	d__Bacteria;p__Actinomycetota;c__Actinomycetia;o__Actinomycetales;f__Microbacteriaceae;g__NC76-1;s__Unclassified	473	1524843	16806	3586	1950	257	61.5	4.78
MAG325	d__Bacteria;p__Bacillota;c__Bacilli;o__Bacillales;f__Planococcaceae;g__Sporosarcina;s__Unclassified	472	1977557	43744	4665	2273	257	74.86	3.6
MAG716	d__Bacteria;p__Bacteroidota;c__Bacteroidia;o__Chitinophagales;f__Saprospiraceae;g__JADKGY01;s__Unclassified	469	2899302	45879	7933	3048	322	92.11	2.22
MAG980	d__Bacteria;p__Gemmatimonadota;c__Gemmatimonadetes;o__Gemmatimonadales;f__Gemmatimonadaceae;g__JABFXC01;s__Unclassified	469	3088137	35464	7828	3547	307	72.97	3.12
MAG346	d__Bacteria;p__Gemmatimonadota;c__Gemmatimonadetes;o__Gemmatimonadales;f__Gemmatimonadaceae;g__JABFXC01;s__Unclassified	468	3470082	60268	10913	3325	311	78.71	3.49
MAG446	d__Bacteria;p__Bacteroidota;c__Bacteroidia;o__Bacteroidales;f__Dysgonomonadaceae;g__Fermentimonas;s__Fermentimonas sp015478775	468	1929777	15928	4664	2237	309	67.91	3.39
MAG1047	d__Bacteria;p__Acidobacteriota;c__Blastocatellia;o__Pyrinomonadales;f__Pyrinomonadaceae;g__SXVE01;s__Unclassified	467	3088894	34932	9041	3224	296	66.03	1.48
MAG627	d__Bacteria;p__Bacillota;c__Bacilli;o__Lactobacillales;f__Enterococcaceae;g__Enterococcus_I;s__Enterococcus_I alcedinis	463	2068451	23129	5478	2219	268	88.56	4.38
MAG88	d__Bacteria;p__Actinomycetota;c__Actinomycetia;o__Mycobacteriales;f__Jatrophihabitantaceae;g__Jatrophihabitans;s__Unclassified	463	1671030	10551	3788	2320	259	57.22	0.48
MAG855	d__Bacteria;p__Actinomycetota;c__Thermoleophilia;o__Gaiellales;f__Gaiellaceae;g__VAXT01;s__Unclassified	463	1678479	21273	4191	1992	251	68.02	1.55
MAG768	d__Bacteria;p__Actinomycetota;c__Thermoleophilia;o__Gaiellales;f__Gaiellaceae;g__JACCRW01;s__Unclassified	462	2260085	21634	6035	2529	261	88.63	2.48
MAG450	d__Bacteria;p__Actinomycetota;c__Thermoleophilia;o__Solirubrobacterales;f__70-9;g__JAJKHV01;s__Unclassified	462	1742080	15901	4461	2067	252	66.35	1.83
MAG770	d__Bacteria;p__Pseudomonadota;c__Alphaproteobacteria;o__Rhodobacterales;f__Rhodobacteraceae;g__Paracoccus;s__Unclassified	461	3212631	35160	9108	3322	285	97.59	2.51
MAG636	d__Bacteria;p__Actinomycetota;c__Acidimicrobiia;o__Acidimicrobiales;f__AC-14;g__CADCTB01;s__Unclassified	460	3877068	65570	14041	3618	276	66.56	4.66
MAG1130	d__Bacteria;p__Bacteroidota;c__Bacteroidia;o__Flavobacteriales;f__Flavobacteriaceae;g__Flavobacterium;s__Unclassified	460	1331542	14655	3342	1592	261	67.17	1.11
MAG488	d__Bacteria;p__Gemmatimonadota;c__Gemmatimonadetes;o__Gemmatimonadales;f__Gemmatimonadaceae;g__JABFXC01;s__Unclassified	459	3541086	41373	11085	3365	316	80.22	3.31
MAG989	d__Bacteria;p__Pseudomonadota;c__Gammaproteobacteria;o__Burkholderiales;f__Burkholderiaceae;g__Pseudoduganella;s__Unclassified	458	5210017	69512	14673	6128	318	88.4	1.13
MAG1019	d__Bacteria;p__Actinomycetota;c__Actinomycetia;o__Mycobacteriales;f__Mycobacteriaceae;g__Corynebacterium;s__Corynebacterium variabile	458	2407012	32664	6719	2640	289	80.37	5.98
MAG368	d__Bacteria;p__Actinomycetota;c__Actinomycetia;o__Actinomycetales;f__Micrococcaceae;g__Arthrobacter_H;s__Arthrobacter_H sp016892645	458	2874766	41394	8410	3001	290	75.77	1.44
MAG1071	d__Bacteria;p__Actinomycetota;c__UBA4738;o__UBA4738;f__HRBIN12;g__Unclassified;s__Unclassified	457	2266535	20163	6245	2505	267	67.53	2.1
MAG463	d__Bacteria;p__Actinomycetota;c__Thermoleophilia;o__Solirubrobacterales;f__70-9;g__RHKX01;s__Unclassified	456	2493853	28271	7648	2560	275	84.78	3.49
MAG18	d__Bacteria;p__Pseudomonadota;c__Gammaproteobacteria;o__Pseudomonadales;f__Moraxellaceae;g__Acinetobacter;s__Acinetobacter pseudolwoffii	456	1600861	21399	4314	1877	250	53.16	0.79
MAG219	d__Bacteria;p__Pseudomonadota;c__Alphaproteobacteria;o__Sphingomonadales;f__Sphingomonadaceae;g__Sphingomicrobium;s__Unclassified	455	1593862	15812	4002	1931	252	74.89	2.03
MAG659	d__Bacteria;p__Bacteroidota;c__Bacteroidia;o__Chitinophagales;f__Chitinophagaceae;g__Niabella;s__Niabella sp023423285	454	2678817	27422	7506	3061	302	90.49	1.17
MAG915	d__Bacteria;p__Actinomycetota;c__Actinomycetia;o__Mycobacteriales;f__Mycobacteriaceae;g__Gordonia;s__Unclassified	453	2178098	23994	5644	2612	285	67.79	1.63
MAG79	d__Bacteria;p__Actinomycetota;c__Actinomycetia;o__Actinomycetales;f__Micrococcaceae;g__Glutamicibacter;s__Glutamicibacter arilaitensis	452	2583001	38483	9732	2300	283	78.93	0.7
MAG61	d__Bacteria;p__Bacteroidota;c__Bacteroidia;o__Flavobacteriales;f__Weeksellaceae;g__Kaistella;s__Kaistella pullorum	452	1303540	15147	3283	1495	253	50.73	1.06
MAG1123	d__Bacteria;p__Actinomycetota;c__Thermoleophilia;o__Gaiellales;f__Gaiellaceae;g__VAXT01;s__Unclassified	451	1509257	13837	3706	1924	249	68.1	3.63
MAG930	d__Bacteria;p__Acidobacteriota;c__Blastocatellia;o__Pyrinomonadales;f__Pyrinomonadaceae;g__UBA11740;s__Unclassified	450	4157516	59090	14960	4324	323	100	3.09
MAG213	d__Bacteria;p__Actinomycetota;c__Thermoleophilia;o__Gaiellales;f__Gaiellaceae;g__PALSA-600;s__Unclassified	450	2364189	30098	6588	2614	260	74.26	4.13
MAG873	d__Bacteria;p__Actinomycetota;c__Actinomycetia;o__Propionibacteriales;f__Propionibacteriaceae;g__Aestuariimicrobium;s__Aestuariimicrobium sp017355265	449	2604438	34847	8336	2575	294	93.16	1.83
MAG339	d__Bacteria;p__Nitrospirota;c__Nitrospiria;o__Nitrospirales;f__Nitrospiraceae;g__Nitrospira_C;s__Unclassified	448	3140027	39633	9342	3390	267	84.32	0.77
MAG1111	d__Bacteria;p__Pseudomonadota;c__Alphaproteobacteria;o__Sphingomonadales;f__Sphingomonadaceae;g__Sphingomonas_O;s__Unclassified	445	1839952	27578	4919	2265	261	79.77	4.38
MAG24	d__Bacteria;p__Actinomycetota;c__Actinomycetia;o__Actinomycetales;f__Dermatophilaceae;g__Flexivirga;s__Unclassified	444	3658411	45661	12676	3521	299	87.75	3.01
MAG516	d__Bacteria;p__Pseudomonadota;c__Gammaproteobacteria;o__Diplorickettsiales;f__Diplorickettsiaceae;g__Aquirickettsiella;s__Unclassified	444	1468284	19046	4113	1585	263	89.52	2.27
MAG353	d__Bacteria;p__Actinomycetota;c__Actinomycetia;o__Actinomycetales;f__Dermabacteraceae;g__Brachybacterium;s__Brachybacterium muris	442	2304105	30658	6702	2506	294	80.93	1.76
MAG566	d__Bacteria;p__Chloroflexota;c__Limnocylindria;o__Limnocylindrales;f__CSP1-4;g__SPCO01;s__Unclassified	442	2327353	38169	6623	2614	287	66.2	0.96
MAG678	d__Bacteria;p__Bacillota_A;c__Clostridia;o__Clostridiales;f__Clostridiaceae;g__Clostridium;s__Clostridium sp000435835	442	1525616	21618	4311	1667	284	70.21	7.68
MAG33	d__Bacteria;p__Pseudomonadota;c__Alphaproteobacteria;o__Sphingomonadales;f__Sphingomonadaceae;g__Sphingomicrobium;s__Unclassified	442	1870534	23250	6003	1920	260	64.6	1.47
MAG437	d__Bacteria;p__Patescibacteria;c__Microgenomatia;o__Levybacterales;f__UBA12049;g__PRDT01;s__Unclassified	440	693644	6674	1549	1071	206	55.74	2.92
MAG900	d__Bacteria;p__Gemmatimonadota;c__Gemmatimonadetes;o__Longimicrobiales;f__Longimicrobiaceae;g__Longimicrobium;s__Unclassified	439	7294658	136998	26611	8652	314	91.05	1.99
MAG1032	d__Bacteria;p__Actinomycetota;c__Actinomycetia;o__Actinomycetales;f__Dermabacteraceae;g__Brachybacterium;s__Brachybacterium sp012799425	438	3066222	33723	8866	3564	304	75.12	4.78
MAG511	d__Bacteria;p__Actinomycetota;c__Actinomycetia;o__Propionibacteriales;f__Propionibacteriaceae;g__Arachnia;s__Arachnia sp012837465	436	2701278	49729	8479	2825	305	84.93	6.91
MAG223	d__Bacteria;p__Gemmatimonadota;c__Gemmatimonadetes;o__Gemmatimonadales;f__GWC2-71-9;g__Unclassified;s__Unclassified	436	2697482	29654	7455	3339	292	80.21	0.58
MAG246	d__Bacteria;p__Actinomycetota;c__Thermoleophilia;o__Solirubrobacterales;f__70-9;g__Unclassified;s__Unclassified	435	1641553	15160	4389	2117	257	56.95	0.91
MAG129	d__Bacteria;p__Pseudomonadota;c__Gammaproteobacteria;o__Pseudomonadales;f__Spongiibacteraceae;g__Unclassified;s__Unclassified	434	1808651	12899	4592	2544	273	50.02	0.21
MAG1058	d__Bacteria;p__Pseudomonadota;c__Gammaproteobacteria;o__Pseudomonadales;f__Pseudomonadaceae;g__Halopseudomonas;s__Unclassified	434	2200794	21401	5566	3019	286	62.74	5.86
MAG1016	d__Bacteria;p__Chloroflexota;c__Limnocylindria;o__QHBO01;f__QHBO01;g__JACDBZ01;s__Unclassified	433	1758344	18451	4903	2005	264	51.32	0.59
MAG134	d__Bacteria;p__Bacteroidota;c__Bacteroidia;o__Sphingobacteriales;f__Sphingobacteriaceae;g__Pedobacter;s__Unclassified	432	2390194	27867	6895	2814	285	91.18	0.84
MAG530	d__Bacteria;p__Actinomycetota;c__Actinomycetia;o__Actinomycetales;f__Micrococcaceae;g__Kocuria;s__Kocuria carniphila	431	2275529	41910	9306	2259	291	70.13	0.28
MAG138	d__Bacteria;p__Bacteroidota;c__Bacteroidia;o__Chitinophagales;f__Chitinophagaceae;g__UBA1952;s__Unclassified	428	3321281	48123	10081	3918	307	93.41	0.63
MAG537	d__Bacteria;p__Actinomycetota;c__Actinomycetia;o__Actinomycetales;f__Micrococcaceae;g__Glutamicibacter;s__Glutamicibacter arilaitensis	426	2429875	35234	7231	2888	281	81.45	1.09
MAG460	d__Bacteria;p__Actinomycetota;c__Actinomycetia;o__Propionibacteriales;f__Propionibacteriaceae;g__Arachnia;s__Unclassified	424	2347902	36312	7494	2607	291	86	3.38
MAG826	d__Bacteria;p__Dormibacterota;c__Dormibacteria;o__Dormibacterales;f__Dormibacteraceae;g__CF-28;s__Unclassified	423	2563539	40080	8213	2929	281	85.35	2.75
MAG184	d__Bacteria;p__Actinomycetota;c__Actinomycetia;o__Actinomycetales;f__Microbacteriaceae;g__Curtobacterium;s__Unclassified	423	2538256	30314	8578	2742	289	83.4	0.81
MAG293	d__Bacteria;p__Actinomycetota;c__Thermoleophilia;o__Solirubrobacterales;f__70-9;g__RHKX01;s__Unclassified	423	2462676	31109	7657	2718	278	85.86	1.63
MAG997	d__Bacteria;p__Dormibacterota;c__Dormibacteria;o__Dormibacterales;f__Dormibacteraceae;g__Unclassified;s__Unclassified	423	1992327	20311	5712	2437	267	65.7	3.17
MAG1025	d__Bacteria;p__Chloroflexota;c__Chloroflexia;o__Thermomicrobiales;f__UBA6265;g__UBA6265;s__Unclassified	420	3405182	64576	15331	3245	303	91.46	0.63
MAG415	d__Archaea;p__Thermoplasmatota;c__E2;o__JACPAO01;f__JAHFTW01;g__Unclassified;s__Unclassified	418	2103725	28056	6232	2517	261	80.09	0.74
MAG654	d__Bacteria;p__Actinomycetota;c__Thermoleophilia;o__Solirubrobacterales;f__Solirubrobacteraceae;g__Unclassified;s__Unclassified	416	3175199	35251	10452	3677	273	82.15	5.34
MAG308	d__Bacteria;p__Pseudomonadota;c__Gammaproteobacteria;o__Burkholderiales;f__Burkholderiaceae_C;g__Paenalcaligenes;s__Unclassified	416	2489792	81864	12438	2180	282	79.86	7.1
MAG1102	d__Bacteria;p__Actinomycetota;c__Actinomycetia;o__Actinomycetales;f__Dermatophilaceae;g__F2B08;s__Unclassified	415	3375595	69611	12142	3499	307	94.76	1
MAG424	d__Bacteria;p__Bacillota;c__Bacilli;o__Staphylococcales;f__Salinicoccaceae;g__Salinicoccus;s__Unclassified	414	2631812	39337	8292	3137	276	83.47	6.61
MAG850	d__Bacteria;p__Actinomycetota;c__Actinomycetia;o__Mycobacteriales;f__Mycobacteriaceae;g__Dietzia;s__Dietzia aurantiaca	414	2772835	64817	10328	2952	295	78.36	1.95
MAG492	d__Bacteria;p__Acidobacteriota;c__Thermoanaerobaculia;o__Gp7-AA8;f__Gp7-AA8;g__JAENWF01;s__Unclassified	414	4014167	59440	14559	4504	312	85.83	1.92
MAG483	d__Bacteria;p__Actinomycetota;c__Actinomycetia;o__Actinomycetales;f__Microbacteriaceae;g__Agrococcus;s__Unclassified	414	2425338	37476	6971	3006	286	76.71	2.25
MAG1030	d__Bacteria;p__Chloroflexota;c__Chloroflexia;o__Chloroflexales;f__Herpetosiphonaceae;g__Herpetosiphon;s__Herpetosiphon geysericola	413	5363069	99813	21478	5932	318	99.98	3.49
MAG1099	d__Bacteria;p__Actinomycetota;c__Actinomycetia;o__Propionibacteriales;f__Propionibacteriaceae;g__Arachnia;s__Unclassified	413	2530261	41704	8857	2833	298	85.84	4.38
MAG68	d__Bacteria;p__Actinomycetota;c__Actinomycetia;o__Actinomycetales;f__Dermatophilaceae;g__CAKUSI01;s__Unclassified	412	3585811	196247	32416	2257	309	89.44	6.87
MAG1080	d__Bacteria;p__Actinomycetota;c__Actinomycetia;o__Mycobacteriales;f__Jatrophihabitantaceae;g__QHCC01;s__Unclassified	411	3018588	86252	14693	3017	291	87.93	2.24
MAG300	d__Bacteria;p__Actinomycetota;c__Actinomycetia;o__Mycobacteriales;f__Jatrophihabitantaceae;g__Jatrophihabitans_A;s__Unclassified	411	2892778	30080	9811	3495	294	87.27	0.11
MAG132	d__Bacteria;p__Pseudomonadota;c__Alphaproteobacteria;o__Sphingomonadales;f__Sphingomonadaceae;g__Sphingomicrobium;s__Unclassified	411	1746788	25557	5108	2124	254	68.69	8.74
MAG765	d__Bacteria;p__Actinomycetota;c__Actinomycetia;o__Mycobacteriales;f__Mycobacteriaceae;g__Corynebacterium;s__Corynebacterium gallinarum	410	2259758	26496	6923	2810	290	84.87	0.96
MAG143	d__Bacteria;p__Actinomycetota;c__Actinomycetia;o__Mycobacteriales;f__Frankiaceae;g__Unclassified;s__Unclassified	410	2726154	35488	7534	3622	264	76.79	0.05
MAG740	d__Bacteria;p__Pseudomonadota;c__Alphaproteobacteria;o__Sphingomonadales;f__Sphingomonadaceae;g__Sphingomicrobium;s__Unclassified	409	2291281	39812	7245	2750	269	84.53	0.8
MAG327	d__Archaea;p__Methanobacteriota;c__Methanobacteria;o__Methanobacteriales;f__Methanobacteriaceae;g__Methanosphaera;s__Methanosphaera sp022768985	409	1266062	16927	3486	1697	343	82.37	0.04
MAG420	d__Bacteria;p__Pseudomonadota;c__Alphaproteobacteria;o__Sphingomonadales;f__Sphingomonadaceae;g__Sphingomicrobium;s__Unclassified	409	1637699	16253	4250	2457	258	55.16	7.11
MAG520	d__Bacteria;p__Acidobacteriota;c__Thermoanaerobaculia;o__UBA5704;f__UBA5704;g__UBA5704;s__Unclassified	408	7585643	124858	29919	8609	384	100	4.37
MAG948	d__Bacteria;p__Pseudomonadota;c__Gammaproteobacteria;o__Burkholderiales;f__Nitrosomonadaceae;g__Nitrosospira;s__Unclassified	408	1145564	10466	2824	1812	246	58.41	3.78
MAG605	d__Bacteria;p__Bacteroidota;c__Bacteroidia;o__Sphingobacteriales;f__Sphingobacteriaceae;g__Sphingobacterium;s__Unclassified	407	2558040	66371	8847	2835	313	88.14	1.48
MAG592	d__Bacteria;p__Bacteroidota;c__Bacteroidia;o__Sphingobacteriales;f__Sphingobacteriaceae;g__Sphingobacterium;s__Unclassified	407	1674202	13655	4472	2528	277	57.95	1.08
MAG245	d__Bacteria;p__Bacteroidota;c__Bacteroidia;o__Flavobacteriales;f__Weeksellaceae;g__MFBS3-17;s__MFBS3-17 sp014041915	406	1514399	38061	4424	2019	266	59.91	3.26
MAG451	d__Bacteria;p__Gemmatimonadota;c__Gemmatimonadetes;o__Gemmatimonadales;f__Gemmatimonadaceae;g__JABFXC01;s__Unclassified	401	2998033	55637	11699	3193	310	89.76	1.59
MAG92	d__Bacteria;p__Actinomycetota;c__Actinomycetia;o__Actinomycetales;f__Micrococcaceae;g__Glutamicibacter;s__Glutamicibacter protophormiae	401	2985865	51128	10397	3451	294	87.21	1.21
MAG597	d__Bacteria;p__Actinomycetota;c__Actinomycetia;o__Propionibacteriales;f__Propionibacteriaceae;g__Brevilactibacter;s__Brevilactibacter sp014164685	401	2062511	26602	7308	2292	283	86.53	0.69
MAG124	d__Bacteria;p__Pseudomonadota;c__Gammaproteobacteria;o__Steroidobacterales;f__Steroidobacteraceae;g__SCUD01;s__Unclassified	401	2083078	33544	6059	2934	291	70.81	0.43
MAG297	d__Bacteria;p__Acidobacteriota;c__Thermoanaerobaculia;o__UBA5704;f__UBA5704;g__UBA5704;s__Unclassified	400	5400892	78090	23033	6865	323	51.88	5.35
MAG617	d__Bacteria;p__Actinomycetota;c__Actinomycetia;o__Mycobacteriales;f__Mycobacteriaceae;g__Corynebacterium;s__Corynebacterium sp012837295	400	1755275	22422	5392	2265	284	61.71	0.15
MAG225	d__Bacteria;p__Bacillota_A;c__Clostridia;o__Tissierellales;f__Peptoniphilaceae;g__Gallicola;s__Gallicola sp012798975	399	1724952	42409	6532	1918	261	79.76	2.63
MAG217	d__Bacteria;p__Actinomycetota;c__Actinomycetia;o__Actinomycetales;f__Micrococcaceae;g__Glutamicibacter;s__Unclassified	399	3122926	96140	10312	3814	286	77.77	6.17
MAG625	d__Bacteria;p__Actinomycetota;c__Actinomycetia;o__Propionibacteriales;f__Propionibacteriaceae;g__Brevilactibacter;s__Brevilactibacter sinopodophylli	398	2529470	37412	9660	2718	295	81.27	5.85
MAG576	d__Bacteria;p__Pseudomonadota;c__Alphaproteobacteria;o__Sphingomonadales;f__Sphingomonadaceae;g__Allosphingosinicella;s__Unclassified	398	2957994	44124	10129	3552	274	85.69	1.96
MAG812	d__Bacteria;p__Pseudomonadota;c__Gammaproteobacteria;o__Burkholderiales;f__Nitrosomonadaceae;g__Nitrosospira;s__Nitrosospira multiformis_D	398	1365485	11361	3671	2106	258	57.58	1.66
MAG211	d__Bacteria;p__Actinomycetota;c__Actinomycetia;o__Propionibacteriales;f__Propionibacteriaceae;g__Arachnia;s__Arachnia massiliensis_A	397	2543753	58083	9462	2901	296	86.54	3.12
MAG302	d__Bacteria;p__Acidobacteriota;c__Blastocatellia;o__Pyrinomonadales;f__Pyrinomonadaceae;g__JAFDVJ01;s__Unclassified	396	6397020	135779	26450	7957	338	91.35	2.19
MAG546	d__Bacteria;p__Bacteroidota;c__Bacteroidia;o__Chitinophagales;f__Chitinophagaceae;g__Ferruginibacter;s__Unclassified	396	2998606	37229	10595	3621	310	88.76	0.16
MAG753	d__Bacteria;p__Bacteroidota;c__Bacteroidia;o__Flavobacteriales;f__Flavobacteriaceae;g__Flavobacterium;s__Flavobacterium macacae	396	2242357	31435	7137	3099	285	68.88	0.51
MAG1065	d__Bacteria;p__Chloroflexota;c__Limnocylindria;o__QHBO01;f__QHBO01;g__JACDBZ01;s__Unclassified	396	1940136	25383	5934	2516	269	61.99	2.65
MAG26	d__Bacteria;p__Pseudomonadota;c__Alphaproteobacteria;o__Sphingomonadales;f__Sphingomonadaceae;g__Erythrobacter;s__Unclassified	395	1740529	21324	5299	2269	265	50.08	1.33
MAG266	d__Bacteria;p__Gemmatimonadota;c__Gemmatimonadetes;o__Gemmatimonadales;f__GWC2-71-9;g__Unclassified;s__Unclassified	394	3162892	76814	11086	3762	304	86.51	3.8
MAG255	d__Bacteria;p__Dormibacterota;c__Dormibacteria;o__Dormibacterales;f__Dormibacteraceae;g__CF-28;s__Unclassified	394	2637900	35312	9643	3001	279	93.63	2.37
MAG1085	d__Bacteria;p__Bacillota;c__Bacilli;o__Lactobacillales;f__Lactobacillaceae;g__Limosilactobacillus;s__Limosilactobacillus ingluviei	391	1606207	26374	5513	1937	265	84.87	3.47
MAG897	d__Bacteria;p__Actinomycetota;c__Thermoleophilia;o__Gaiellales;f__Gaiellaceae;g__JACCRW01;s__Unclassified	389	2395681	35355	8250	2989	270	86.21	1.73
MAG1101	d__Bacteria;p__Actinomycetota;c__Thermoleophilia;o__Gaiellales;f__Gaiellaceae;g__JACCRW01;s__Unclassified	389	2099766	35591	6899	2727	263	72.86	0.86
MAG950	d__Bacteria;p__Actinomycetota;c__Actinomycetia;o__Actinomycetales;f__Dermatophilaceae;g__Marihabitans;s__Marihabitans endophyticus	388	2391987	59841	10709	2468	299	91.35	4.58
MAG253	d__Bacteria;p__Bacteroidota;c__Bacteroidia;o__Flavobacteriales;f__Flavobacteriaceae;g__JAAYLC01;s__Unclassified	387	2350196	41880	9089	2748	287	83.62	0.35
MAG917	d__Bacteria;p__Bacillota_A;c__Clostridia;o__Tissierellales;f__Gottschalkiaceae;g__Andreesenia;s__Unclassified	387	1548706	44427	5665	1871	261	85.25	4.02
MAG106	d__Bacteria;p__Verrucomicrobiota;c__Verrucomicrobiae;o__Chthoniobacterales;f__UBA10450;g__Udaeobacter;s__Unclassified	386	3702091	75158	14408	4209	298	89.64	3.33
MAG414	d__Bacteria;p__Pseudomonadota;c__Alphaproteobacteria;o__Rhodobacterales;f__Rhodobacteraceae;g__Paracoccus;s__Unclassified	385	2785828	39637	9311	3507	287	87.6	2.17
MAG771	d__Bacteria;p__Myxococcota;c__Myxococcia;o__Myxococcales;f__40CM-4-68-19;g__Unclassified;s__Unclassified	384	3811602	55861	13674	4910	331	84.12	1.74
MAG442	d__Bacteria;p__Bacillota;c__Bacilli;o__Lactobacillales;f__Lactobacillaceae;g__Lactobacillus;s__Lactobacillus amylovorus	381	1423065	22993	4810	1663	261	78.24	1.01
MAG388	d__Bacteria;p__Patescibacteria;c__Saccharimonadia;o__Saccharimonadales;f__UBA4665;g__Unclassified;s__Unclassified	381	1578550	26502	4964	2225	201	81.36	3.98
MAG1112	d__Bacteria;p__Chloroflexota;c__Limnocylindria;o__Limnocylindrales;f__CSP1-4;g__SPCO01;s__Unclassified	380	2906891	41025	11450	3564	290	86.73	2.04
MAG1008	d__Bacteria;p__Pseudomonadota;c__Alphaproteobacteria;o__Rhodobacterales;f__Rhodobacteraceae;g__Paracoccus;s__Paracoccus alcaliphilus	380	2406798	76759	7296	3268	287	62.09	2.95
MAG1078	d__Bacteria;p__Actinomycetota;c__Actinomycetia;o__Actinomycetales;f__Microbacteriaceae;g__Yonghaparkia;s__Unclassified	380	1849206	21453	6263	2331	275	72.24	0.41
MAG606	d__Bacteria;p__Pseudomonadota;c__Gammaproteobacteria;o__Pseudomonadales;f__Moraxellaceae;g__Psychrobacter;s__Psychrobacter faecalis	379	2812766	55389	11901	3489	307	96.56	1.03
MAG559	d__Bacteria;p__Bacillota;c__Bacilli;o__Lactobacillales;f__Enterococcaceae;g__Enterococcus_I;s__Unclassified	379	1532134	18330	4829	2113	273	59.13	6.3
MAG680	d__Bacteria;p__Actinomycetota;c__Actinomycetia;o__Actinomycetales;f__Microbacteriaceae;g__Agromyces_B;s__Unclassified	378	2658954	27463	9581	3600	283	91.14	2.02
MAG97	d__Bacteria;p__Pseudomonadota;c__Alphaproteobacteria;o__Rhizobiales;f__Devosiaceae;g__Devosia;s__Devosia sp015234425	376	3542235	65071	16998	3833	288	92.6	1.16
MAG942	d__Bacteria;p__Actinomycetota;c__Actinomycetia;o__Actinomycetales;f__Micrococcaceae;g__Kocuria;s__Unclassified	376	1957811	25664	6318	2698	299	64.96	1.42
MAG305	d__Bacteria;p__Actinomycetota;c__Actinomycetia;o__Actinomycetales;f__Dermatophilaceae;g__Phycicoccus;s__Phycicoccus sp001428065	375	2033497	28170	6901	2726	285	58.91	0.73
MAG1108	d__Archaea;p__Thermoproteota;c__Nitrososphaeria;o__Nitrososphaerales;f__Nitrososphaeraceae;g__Nitrosocosmicus;s__Nitrosocosmicus oleophilus	374	2787631	52644	11708	3239	212	94.01	0.2
MAG1106	d__Bacteria;p__Bacteroidota;c__Bacteroidia;o__Flavobacteriales;f__Weeksellaceae;g__Kaistella;s__Unclassified	374	2247495	72411	11094	2343	290	87.37	4.13
MAG209	d__Bacteria;p__Pseudomonadota;c__Gammaproteobacteria;o__Burkholderiales;f__Burkholderiaceae_A;g__Unclassified;s__Unclassified	372	3140813	39521	10430	4148	306	87.1	0.63
MAG746	d__Bacteria;p__Patescibacteria;c__Saccharimonadia;o__Saccharimonadales;f__Saccharimonadaceae;g__Saccharimonas;s__Unclassified	372	1059494	16570	3696	1238	233	85.46	9.49
MAG54	d__Bacteria;p__Actinomycetota;c__Thermoleophilia;o__Gaiellales;f__Gaiellaceae;g__JACCRW01;s__Unclassified	372	2483665	47005	9764	2928	273	84.69	1.26
MAG244	d__Bacteria;p__Actinomycetota;c__Thermoleophilia;o__Gaiellales;f__Gaiellaceae;g__JACCRW01;s__Unclassified	371	2228979	35595	7472	2933	267	86.27	3.87
MAG171	d__Bacteria;p__Actinomycetota;c__Actinomycetia;o__Mycobacteriales;f__Mycobacteriaceae;g__Dietzia;s__Unclassified	371	2276820	75055	9686	2474	301	73.6	3.27
MAG882	d__Bacteria;p__Actinomycetota;c__Actinomycetia;o__Actinomycetales;f__Microbacteriaceae;g__Microbacterium;s__Unclassified	369	2642443	103047	11317	3127	300	83.86	0.39
MAG884	d__Bacteria;p__Pseudomonadota;c__Gammaproteobacteria;o__Pseudomonadales;f__Moraxellaceae;g__Acinetobacter;s__Unclassified	368	2429374	35040	8222	3322	285	79.85	0.32
MAG367	d__Bacteria;p__Actinomycetota;c__Actinomycetia;o__Mycobacteriales;f__Mycobacteriaceae;g__Corynebacterium;s__Corynebacterium sp012837295	367	2014256	26095	7430	2657	300	78.34	0.47
MAG4	d__Bacteria;p__Bacillota;c__Bacilli;o__Lactobacillales;f__Aerococcaceae;g__Aerococcus;s__Aerococcus urinaeequi	366	1408791	24787	5765	1683	273	74.79	2.19
MAG440	d__Bacteria;p__Actinomycetota;c__Actinomycetia;o__Actinomycetales;f__Microbacteriaceae;g__Leucobacter;s__Unclassified	365	1510175	29186	5123	2019	277	78.03	0.15
MAG407	d__Bacteria;p__Actinomycetota;c__Actinomycetia;o__Actinomycetales;f__Dermatophilaceae;g__Piscicoccus;s__Piscicoccus intestinalis	363	3803277	82004	11100	6228	309	70.08	9.95
MAG896	d__Bacteria;p__Actinomycetota;c__Actinomycetia;o__Propionibacteriales;f__Nocardioidaceae;g__Nocardioides;s__Unclassified	362	3083433	41424	13779	3969	292	71.88	0.92
MAG733	d__Bacteria;p__Chloroflexota;c__Limnocylindria;o__QHBO01;f__QHBO01;g__JACDBZ01;s__Unclassified	361	1413930	13179	4199	2437	251	56.44	0.26
MAG1001	d__Bacteria;p__Actinomycetota;c__Actinomycetia;o__Propionibacteriales;f__Nocardioidaceae;g__Nocardioides;s__Unclassified	360	3944903	69412	15459	4893	297	89.67	1.21
MAG13	d__Bacteria;p__Pseudomonadota;c__Gammaproteobacteria;o__Burkholderiales;f__Burkholderiaceae_B;g__Rhodoferax_A;s__Rhodoferax_A sp004323695	360	3235913	42639	12517	4174	292	92.42	4.46
MAG373	d__Bacteria;p__Actinomycetota;c__Thermoleophilia;o__Solirubrobacterales;f__70-9;g__RHKX01;s__Unclassified	360	2562301	56588	10732	3159	288	87.87	0.17
MAG400	d__Bacteria;p__Bacteroidota;c__Bacteroidia;o__Flavobacteriales;f__Weeksellaceae;g__Chryseobacterium;s__Chryseobacterium cucumeris	360	4790090	69834	20652	5864	312	98.6	0.78
MAG759	d__Bacteria;p__Bacillota;c__Bacilli;o__Staphylococcales;f__Salinicoccaceae;g__Jeotgalicoccus;s__Jeotgalicoccus nanhaiensis	360	1351245	24373	5162	1715	259	66.07	2.35
MAG497	d__Bacteria;p__Actinomycetota;c__Actinomycetia;o__Mycobacteriales;f__Jatrophihabitantaceae;g__Jatrophihabitans;s__Unclassified	358	2952335	41058	11766	3949	296	83.58	2.03
MAG889	d__Bacteria;p__Pseudomonadota;c__Alphaproteobacteria;o__Sphingomonadales;f__Sphingomonadaceae;g__Sphingomicrobium;s__Unclassified	357	2113205	34042	8002	2764	268	86.14	0.93
MAG523	d__Bacteria;p__Actinomycetota;c__Actinomycetia;o__Actinomycetales;f__Cellulomonadaceae;g__Timonella;s__Unclassified	356	1866829	31036	6388	2719	287	54.83	4.78
MAG1005	d__Bacteria;p__Actinomycetota;c__Thermoleophilia;o__Gaiellales;f__Gaiellaceae;g__JACCRW01;s__Unclassified	355	2322754	40804	8964	3082	273	83.52	3.41
MAG875	d__Bacteria;p__Actinomycetota;c__Thermoleophilia;o__Gaiellales;f__Gaiellaceae;g__JACCRW01;s__Unclassified	355	2223383	53141	8087	3088	266	87.32	0.89
MAG628	d__Bacteria;p__Bacillota_A;c__Clostridia;o__Peptostreptococcales;f__Filifactoraceae;g__Acetoanaerobium;s__Unclassified	355	1525343	53997	6903	1756	263	70.22	0.59
MAG723	d__Bacteria;p__Pseudomonadota;c__Gammaproteobacteria;o__Burkholderiales;f__Burkholderiaceae;g__Glomeribacter;s__Unclassified	353	1871490	44653	7812	2432	255	92.58	2.29
MAG877	d__Bacteria;p__Pseudomonadota;c__Alphaproteobacteria;o__Sphingomonadales;f__Sphingomonadaceae;g__Sphingomicrobium;s__Unclassified	353	1712857	48111	5884	2422	263	78.65	3.21
MAG384	d__Bacteria;p__Actinomycetota;c__Actinomycetia;o__Actinomycetales;f__Microbacteriaceae;g__NC76-1;s__Unclassified	352	1456196	16178	4775	2201	270	80.43	2.79
MAG674	d__Bacteria;p__Actinomycetota;c__Actinomycetia;o__Nanopelagicales;f__CAIYMF01;g__JAFIHG01;s__Unclassified	352	2717751	44513	10669	3657	302	94.78	2.81
MAG96	d__Bacteria;p__Bacteroidota;c__Bacteroidia;o__Chitinophagales;f__Chitinophagaceae;g__Arachidicoccus;s__Arachidicoccus soli	351	3867114	116724	18513	4886	329	97.68	0.22
MAG40	d__Bacteria;p__Acidobacteriota;c__Thermoanaerobaculia;o__UBA5704;f__UBA5704;g__UBA5704;s__Unclassified	350	7547696	178317	39261	10626	380	100	3.75
MAG396	d__Bacteria;p__Actinomycetota;c__Thermoleophilia;o__Solirubrobacterales;f__70-9;g__Unclassified;s__Unclassified	350	2145470	33026	7343	3404	280	79.1	0.13
MAG186	d__Bacteria;p__Pseudomonadota;c__Gammaproteobacteria;o__Burkholderiales;f__Burkholderiaceae_B;g__Ramlibacter;s__Unclassified	349	3953556	56376	16392	4929	290	86.03	1.88
MAG17	d__Bacteria;p__Bacteroidota;c__Bacteroidia;o__Chitinophagales;f__Chitinophagaceae;g__JAEWAC01;s__Unclassified	349	3905802	80922	16372	5240	316	88.28	0.22
MAG57	d__Bacteria;p__Bacteroidota;c__Bacteroidia;o__Flavobacteriales;f__Weeksellaceae;g__MFBS3-17;s__MFBS3-17 sp014041915	348	1291740	12653	4172	2202	264	50.45	3.12
MAG153	d__Bacteria;p__Actinomycetota;c__Actinomycetia;o__Actinomycetales;f__Dermatophilaceae;g__Ornithinicoccus;s__Ornithinicoccus ciconiae	347	2804846	64944	12852	3519	308	79.77	0.07
MAG727	d__Bacteria;p__Actinomycetota;c__Actinomycetia;o__Actinomycetales;f__Micrococcaceae;g__Glutamicibacter;s__Glutamicibacter soli	347	2842167	50184	12573	3692	293	77.75	0.68
MAG869	d__Bacteria;p__Bacteroidota;c__Bacteroidia;o__Flavobacteriales;f__Flavobacteriaceae;g__JAJYTI01;s__Unclassified	345	2011244	64215	6672	3112	300	74.67	6.47
MAG921	d__Bacteria;p__Actinomycetota;c__Thermoleophilia;o__Solirubrobacterales;f__Thermoleophilaceae;g__Unclassified;s__Unclassified	344	3762413	54688	15066	5332	305	95.68	3.18
MAG1093	d__Bacteria;p__Pseudomonadota;c__Alphaproteobacteria;o__Sphingomonadales;f__Sphingomonadaceae;g__Sphingomicrobium;s__Unclassified	344	2405199	45289	12315	2788	276	79.38	8.69
MAG795	d__Bacteria;p__Acidobacteriota;c__Blastocatellia;o__Pyrinomonadales;f__Pyrinomonadaceae;g__UBA11740;s__Unclassified	343	3900765	53673	16974	5368	333	96.07	0.04
MAG220	d__Bacteria;p__Chloroflexota;c__Limnocylindria;o__QHBO01;f__QHBO01;g__JACDBZ01;s__Unclassified	343	1836122	49380	7905	2408	271	81.2	0.82
MAG531	d__Bacteria;p__Actinomycetota;c__Actinomycetia;o__Mycobacteriales;f__Mycobacteriaceae;g__Gordonia;s__Gordonia sp012515855	342	3923221	95579	24765	4989	312	95.94	9.49
MAG872	d__Bacteria;p__Actinomycetota;c__Actinomycetia;o__Actinomycetales;f__Actinomycetaceae;g__Scrofimicrobium;s__Unclassified	342	2461109	62000	9916	3278	304	71.38	6.72
MAG976	d__Bacteria;p__Actinomycetota;c__Actinomycetia;o__Actinomycetales;f__Microbacteriaceae;g__Microbacterium;s__Microbacterium commune	342	1770074	33913	6388	2488	286	65.31	0.22
MAG90	d__Bacteria;p__Bacteroidota;c__Bacteroidia;o__Flavobacteriales;f__Flavobacteriaceae;g__JAJYTI01;s__Unclassified	342	1666723	28835	5204	2896	284	68.27	0.6
MAG286	d__Bacteria;p__Patescibacteria;c__Saccharimonadia;o__Saccharimonadales;f__2-12-FULL-41-12;g__Unclassified;s__Unclassified	342	657574	6258	2035	1199	208	58.09	0.13
MAG116	d__Bacteria;p__Actinomycetota;c__Actinomycetia;o__Mycobacteriales;f__Mycobacteriaceae;g__Aldersonia;s__Unclassified	341	5016473	114788	26742	6580	314	100	2.74
MAG29	d__Bacteria;p__Actinomycetota;c__Actinomycetia;o__Propionibacteriales;f__Propionibacteriaceae;g__Brevilactibacter;s__Unclassified	341	3067259	66073	14447	3834	306	95.07	2.37
MAG879	d__Bacteria;p__Acidobacteriota;c__Vicinamibacteria;o__Vicinamibacterales;f__2-12-FULL-66-21;g__2-12-FULL-66-21;s__Unclassified	336	4231387	81015	23018	5347	344	98.67	0.53
MAG49	d__Bacteria;p__Pseudomonadota;c__Gammaproteobacteria;o__Steroidobacterales;f__Steroidobacteraceae;g__SCUD01;s__Unclassified	335	2651918	63411	11518	3511	308	94.65	0.59
MAG328	d__Bacteria;p__Bacillota;c__Bacilli;o__Staphylococcales;f__Salinicoccaceae;g__Jeotgalicoccus;s__Jeotgalicoccus nanhaiensis	335	1322452	19373	4371	2277	261	56.5	2.98
MAG1074	d__Bacteria;p__Acidobacteriota;c__Blastocatellia;o__Pyrinomonadales;f__Pyrinomonadaceae;g__Unclassified;s__Unclassified	333	4852746	63489	21745	7402	340	96.29	1.93
MAG912	d__Bacteria;p__Bacillota;c__Bacilli;o__Lactobacillales;f__Aerococcaceae;g__Fundicoccus;s__Unclassified	332	1703658	24661	6057	2709	280	71.19	6.89
MAG489	d__Bacteria;p__Bacteroidota;c__Bacteroidia;o__Sphingobacteriales;f__Sphingobacteriaceae;g__Unclassified;s__Unclassified	331	2928525	72580	14769	3880	317	86.44	0.83
MAG411	d__Bacteria;p__Pseudomonadota;c__Alphaproteobacteria;o__Rhodobacterales;f__Rhodobacteraceae;g__Roseovarius;s__Unclassified	331	2903912	53383	13269	4125	295	97.09	0.4
MAG340	d__Bacteria;p__Pseudomonadota;c__Alphaproteobacteria;o__Sphingomonadales;f__Sphingomonadaceae;g__Sphingomicrobium;s__Unclassified	331	1514446	35348	5668	2409	267	54.58	1.42
MAG1068	d__Archaea;p__Thermoproteota;c__Nitrososphaeria;o__Nitrososphaerales;f__Nitrososphaeraceae;g__TA-21;s__Unclassified	331	958008	11381	3072	1752	205	53.66	0.75
MAG569	d__Bacteria;p__Pseudomonadota;c__Gammaproteobacteria;o__Diplorickettsiales;f__Diplorickettsiaceae;g__Aquirickettsiella;s__Unclassified	330	1638224	26963	7698	2105	282	98.35	0.1
MAG447	d__Bacteria;p__Pseudomonadota;c__Gammaproteobacteria;o__Enterobacterales_A;f__Aeromonadaceae;g__Oceanisphaera;s__Oceanisphaera sp012518835	330	1992450	24604	7740	2971	296	74.19	0.56
MAG574	d__Bacteria;p__Actinomycetota;c__Actinomycetia;o__Actinomycetales;f__Micrococcaceae;g__Enteractinococcus;s__Unclassified	329	2216833	40058	8399	3473	294	79.17	8.43
MAG663	d__Bacteria;p__CSP1-3;c__CSP1-3;o__CSP1-3;f__13-1-40CM-64-14;g__13-1-40CM-64-14;s__Unclassified	327	2233677	31854	9977	3216	272	85.79	0.46
MAG820	d__Bacteria;p__Pseudomonadota;c__Gammaproteobacteria;o__Burkholderiales;f__Burkholderiaceae_C;g__JAJYRX01;s__Unclassified	326	1576705	21008	5647	2657	293	56.88	2
MAG747	d__Bacteria;p__Bacillota;c__Bacilli;o__Lactobacillales;f__Lactobacillaceae;g__Limosilactobacillus;s__Limosilactobacillus oris	326	1089269	23046	4462	1477	246	53.03	1.78
MAG922	d__Bacteria;p__Patescibacteria;c__Saccharimonadia;o__Saccharimonadales;f__UBA5946;g__Unclassified;s__Unclassified	325	626575	5939	2085	1149	215	81.87	1.34
MAG863	d__Bacteria;p__Bacillota;c__Bacilli;o__Bacillales;f__Planococcaceae;g__Sporosarcina;s__Sporosarcina sp003351785	324	2888513	44611	12486	4203	283	94.74	0.54
MAG316	d__Bacteria;p__Actinomycetota;c__Actinomycetia;o__Actinomycetales;f__Dermatophilaceae;g__Ornithinimicrobium;s__Unclassified	323	2499179	53255	10061	3946	306	72.57	0.17
MAG405	d__Bacteria;p__Pseudomonadota;c__Gammaproteobacteria;o__Xanthomonadales;f__Rhodanobacteraceae;g__66-474;s__Unclassified	321	2498849	38759	11411	3643	302	82.27	3.58
MAG402	d__Bacteria;p__Bacteroidota;c__Bacteroidia;o__Flavobacteriales;f__Flavobacteriaceae;g__Flavobacterium;s__Flavobacterium sp018384465	321	2532976	45530	14084	3332	289	91.88	2.44
MAG684	d__Bacteria;p__Actinomycetota;c__Actinomycetia;o__Actinomycetales;f__Dermabacteraceae;g__Brachybacterium;s__Brachybacterium sp014400405	321	2064327	29012	7135	3607	303	58.65	0.12
MAG193	d__Bacteria;p__Acidobacteriota;c__Thermoanaerobaculia;o__UBA5704;f__UBA5704;g__UBA5704;s__Unclassified	320	8414833	129177	43981	13247	371	98.16	5.06
MAG131	d__Bacteria;p__Bacillota;c__Bacilli;o__Bacillales;f__Planococcaceae;g__Planococcus;s__Planococcus sp009707665	316	2221666	45162	9279	3510	271	78.64	0.85
MAG341	d__Bacteria;p__Myxococcota;c__Myxococcia;o__Myxococcales;f__40CM-4-68-19;g__40CM-4-68-19;s__Unclassified	316	4032365	130006	21311	6492	317	95.21	1.2
MAG352	d__Bacteria;p__Actinomycetota;c__Actinomycetia;o__Actinomycetales;f__Brevibacteriaceae;g__Brevibacterium;s__Brevibacterium intestinigallinarum	315	1707721	38888	6925	2533	301	59.69	3.1
MAG119	d__Bacteria;p__Pseudomonadota;c__Gammaproteobacteria;o__Burkholderiales;f__Usitatibacteraceae;g__Usitatibacter;s__Unclassified	314	4468174	106685	24485	5973	313	90.98	5.11
MAG598	d__Bacteria;p__Bacillota;c__Bacilli;o__Lactobacillales;f__Aerococcaceae;g__Jeotgalibaca;s__Jeotgalibaca porci	313	1224004	25095	5947	1644	261	66.17	2.98
MAG874	d__Bacteria;p__Chloroflexota;c__Chloroflexia;o__Thermomicrobiales;f__UBA6265;g__UBA6265;s__Unclassified	310	3096752	64404	19150	4116	308	89.76	1.19
MAG596	d__Bacteria;p__Bacillota;c__Bacilli;o__Lactobacillales;f__Carnobacteriaceae;g__Atopostipes;s__Unclassified	310	1666491	27724	7514	2527	271	58.17	8.82
MAG642	d__Bacteria;p__Patescibacteria;c__Saccharimonadia;o__Saccharimonadales;f__UBA4665;g__Unclassified;s__Unclassified	310	515224	4660	1723	1102	201	59.41	0.92
MAG215	d__Bacteria;p__Bacillota;c__Bacilli;o__Staphylococcales;f__Salinicoccaceae;g__Jeotgalicoccus;s__Jeotgalicoccus coquinae	309	1786188	47763	10329	2339	274	82.6	4.77
MAG99	d__Bacteria;p__Pseudomonadota;c__Gammaproteobacteria;o__Burkholderiales;f__Burkholderiaceae_B;g__Giesbergeria;s__Unclassified	309	1922312	46831	7294	3420	300	59.94	1.37
MAG718	d__Bacteria;p__Bacteroidota;c__Bacteroidia;o__Flavobacteriales;f__Flavobacteriaceae;g__Flavobacterium;s__Flavobacterium viscosum	308	1822185	33027	8177	2843	260	53.43	5.3
MAG573	d__Bacteria;p__Actinomycetota;c__Actinomycetia;o__Mycobacteriales;f__Mycobacteriaceae;g__Corynebacterium;s__Corynebacterium casei	308	1347217	13695	4838	2695	282	54.37	2.07
MAG686	d__Bacteria;p__Chloroflexota;c__Limnocylindria;o__QHBO01;f__QHBO01;g__JACDBZ01;s__Unclassified	307	1714256	20750	6192	3131	272	52.13	0.07
MAG683	d__Bacteria;p__Pseudomonadota;c__Alphaproteobacteria;o__Sphingomonadales;f__Sphingomonadaceae;g__Allosphingosinicella;s__Unclassified	306	3228379	63657	16506	4686	280	92.2	2.22
MAG648	d__Bacteria;p__Pseudomonadota;c__Alphaproteobacteria;o__Sphingomonadales;f__Sphingomonadaceae;g__Qipengyuania;s__Unclassified	304	2202701	52842	9780	3422	285	84.03	2.54
MAG2	d__Bacteria;p__Gemmatimonadota;c__Gemmatimonadetes;o__Longimicrobiales;f__Longimicrobiaceae;g__Longimicrobium;s__Unclassified	303	7059301	233313	41583	10885	325	96.51	1.66
MAG425	d__Bacteria;p__Pseudomonadota;c__Gammaproteobacteria;o__Pseudomonadales;f__Pseudomonadaceae;g__Thiopseudomonas;s__Thiopseudomonas sp012800475	302	1704963	23171	6918	3010	286	67.26	4.43
MAG562	d__Bacteria;p__Actinomycetota;c__Thermoleophilia;o__Gaiellales;f__Gaiellaceae;g__GMQP-bins7;s__Unclassified	301	2204160	38583	8970	3753	276	89.71	0.77
MAG876	d__Bacteria;p__Pseudomonadota;c__Alphaproteobacteria;o__Sphingomonadales;f__Sphingomonadaceae;g__Allosphingosinicella;s__Unclassified	301	3880597	129637	22368	6424	297	91.69	5.69
MAG797	d__Bacteria;p__Bacillota;c__Bacilli;o__Lactobacillales;f__Lactobacillaceae;g__Ligilactobacillus;s__Ligilactobacillus salivarius	300	1527701	53238	7386	2174	269	74.25	4.02
MAG1116	d__Bacteria;p__Actinomycetota;c__Actinomycetia;o__Mycobacteriales;f__Mycobacteriaceae;g__Corynebacterium;s__Corynebacterium marinum	299	2143872	50782	10185	3333	294	79.04	3.05
MAG412	d__Bacteria;p__Actinomycetota;c__Actinomycetia;o__Actinomycetales;f__Microbacteriaceae;g__Agrococcus;s__Unclassified	298	1759681	41170	8544	2590	292	80.37	0.66
MAG720	d__Bacteria;p__Patescibacteria;c__Saccharimonadia;o__Saccharimonadales;f__UBA1547;g__UBA6022;s__Unclassified	297	839909	13107	3268	1489	223	84.56	6.83
MAG867	d__Bacteria;p__Bacillota;c__Bacilli;o__Staphylococcales;f__Salinicoccaceae;g__Aliicoccus;s__Unclassified	297	1095351	22887	4241	2117	261	65.48	0.83
MAG306	d__Bacteria;p__Pseudomonadota;c__Gammaproteobacteria;o__Burkholderiales;f__Burkholderiaceae_C;g__Paenalcaligenes;s__Unclassified	296	2393412	45302	11503	3879	292	93.41	2.21
MAG478	d__Bacteria;p__Chloroflexota;c__UBA6077;o__UBA6077;f__CF-72;g__Unclassified;s__Unclassified	295	5172398	102603	29970	8207	321	89.05	2.8
MAG1029	d__Bacteria;p__Pseudomonadota;c__Alphaproteobacteria;o__Sphingomonadales;f__Sphingomonadaceae;g__Sphingomicrobium;s__Unclassified	295	1028786	24871	3752	1868	244	52.47	0.19
MAG183	d__Bacteria;p__Bacillota;c__Bacilli;o__Bacillales_D;f__Amphibacillaceae;g__Virgibacillus_B;s__Unclassified	293	2103593	42736	10957	3173	282	88.01	0.07
MAG985	d__Bacteria;p__Actinomycetota;c__Actinomycetia;o__Actinomycetales;f__Dermabacteraceae;g__Brachybacterium;s__Brachybacterium massiliense	293	1699452	30132	6817	3097	300	63.76	0.36
MAG938	d__Bacteria;p__Chloroflexota;c__Chloroflexia;o__Thermomicrobiales;f__UBA6265;g__UBA6265;s__Unclassified	292	2740946	69229	12647	4522	303	81.07	4.12
MAG357	d__Bacteria;p__Patescibacteria;c__Saccharimonadia;o__Saccharimonadales;f__UBA4665;g__Unclassified;s__Unclassified	292	534890	6439	1897	1128	212	61.81	0.5
MAG201	d__Bacteria;p__Bacillota;c__Bacilli;o__Erysipelotrichales;f__Erysipelotrichaceae;g__Erysipelothrix;s__Unclassified	291	992704	25346	4536	1681	261	59.28	5.22
MAG870	d__Bacteria;p__Actinomycetota;c__Actinomycetia;o__Propionibacteriales;f__Propionibacteriaceae;g__Aestuariimicrobium;s__Unclassified	290	2816608	69780	15260	4119	311	91.63	1.25
MAG1031	d__Bacteria;p__Actinomycetota;c__Actinomycetia;o__Actinomycetales;f__Actinomycetaceae;g__KH17;s__Unclassified	290	1939544	58658	13921	2416	301	82.98	2.55
MAG155	d__Bacteria;p__Actinomycetota;c__Actinomycetia;o__Mycobacteriales;f__Mycobacteriaceae;g__Corynebacterium;s__Corynebacterium sp945649885	288	2984490	126967	19545	4186	298	92.71	2.01
MAG646	d__Bacteria;p__Bacteroidota;c__Bacteroidia;o__Flavobacteriales;f__Weeksellaceae;g__Planobacterium;s__Unclassified	288	1910154	48509	12609	2580	293	88.87	0.82
MAG813	d__Bacteria;p__Pseudomonadota;c__Alphaproteobacteria;o__Sphingomonadales;f__Sphingomonadaceae;g__Sphingomicrobium;s__Unclassified	285	3140096	74416	23729	3950	286	91.45	6.88
MAG779	d__Bacteria;p__Actinomycetota;c__Thermoleophilia;o__Solirubrobacterales;f__70-9;g__Unclassified;s__Unclassified	284	2064072	30148	8229	3775	285	82.84	1.16
MAG804	d__Bacteria;p__Actinomycetota;c__Actinomycetia;o__Propionibacteriales;f__Propionibacteriaceae;g__Arachnia;s__Unclassified	282	3093620	59982	16507	5074	304	93.67	3.7
MAG236	d__Bacteria;p__Actinomycetota;c__Thermoleophilia;o__Solirubrobacterales;f__70-9;g__Unclassified;s__Unclassified	277	2815368	62232	17292	4540	285	83.41	3.36
MAG937	d__Bacteria;p__Actinomycetota;c__Thermoleophilia;o__Solirubrobacterales;f__Solirubrobacteraceae;g__Unclassified;s__Unclassified	277	3079457	64066	16837	5056	300	97.47	2.17
MAG232	d__Bacteria;p__Pseudomonadota;c__Gammaproteobacteria;o__Pseudomonadales;f__Moraxellaceae;g__Psychrobacter;s__Psychrobacter pasteurii	277	2343524	54336	15018	3953	307	85.91	0.26
MAG928	d__Bacteria;p__Bacteroidota;c__Bacteroidia;o__Bacteroidales;f__Dysgonomonadaceae;g__UBA2632;s__UBA2632 sp012840785	275	1915882	49863	9406	3486	305	87.79	1.82
MAG276	d__Bacteria;p__Actinomycetota;c__Actinomycetia;o__Actinomycetales;f__Beutenbergiaceae;g__Unclassified;s__Unclassified	274	3317768	84569	18754	5349	317	95.4	1.77
MAG944	d__Bacteria;p__Bacillota;c__Bacilli;o__Staphylococcales;f__Salinicoccaceae;g__Salinicoccus;s__Unclassified	273	2175358	63896	14147	3629	280	83.74	3.82
MAG668	d__Bacteria;p__Bacillota;c__Bacilli;o__Lactobacillales;f__Lactobacillaceae;g__Lactobacillus;s__Lactobacillus pullistercoris	272	1244823	23797	5630	2360	261	64.61	4.88
MAG842	d__Bacteria;p__Actinomycetota;c__Actinomycetia;o__Mycobacteriales;f__Mycobacteriaceae;g__Corynebacterium;s__Corynebacterium glutamicum	271	1883464	33740	7777	3903	291	69.8	1.56
MAG735	d__Bacteria;p__Pseudomonadota;c__Alphaproteobacteria;o__Sphingomonadales;f__Sphingomonadaceae;g__Sphingomicrobium;s__Unclassified	269	2127632	41588	10956	3717	287	80.17	3.56
MAG136	d__Bacteria;p__Actinomycetota;c__Actinomycetia;o__Actinomycetales;f__Beutenbergiaceae;g__Salana;s__Unclassified	268	2322297	37451	11879	4150	322	78.54	0.58
MAG94	d__Bacteria;p__Bacteroidota;c__UBA10030;o__UBA10030;f__UBA8401;g__SpSt-333;s__Unclassified	267	3107034	72681	20279	5650	339	98.46	2.3
MAG66	d__Bacteria;p__Verrucomicrobiota;c__Verrucomicrobiae;o__Chthoniobacterales;f__UBA10450;g__AV40;s__Unclassified	267	2732245	49623	14887	4525	307	92.45	6.57
MAG363	d__Bacteria;p__Pseudomonadota;c__Gammaproteobacteria;o__Pseudomonadales;f__Pseudomonadaceae;g__Thiopseudomonas;s__Thiopseudomonas sp012518175	267	1990305	42676	9595	3718	290	81.61	0.69
MAG409	d__Bacteria;p__Bacteroidota;c__Bacteroidia;o__Flavobacteriales;f__Flavobacteriaceae;g__Flavobacterium;s__Unclassified	266	2114782	51689	11106	3848	301	86.23	0.78
MAG487	d__Bacteria;p__Dormibacterota;c__Dormibacteria;o__Dormibacterales;f__Dormibacteraceae;g__Unclassified;s__Unclassified	265	2305584	36773	12466	4031	284	79.91	3.64
MAG241	d__Bacteria;p__Bacillota;c__Bacilli;o__Lactobacillales;f__Carnobacteriaceae;g__Alkalibacterium;s__Unclassified	263	2085464	73743	12173	3435	290	85.55	5.41
MAG641	d__Bacteria;p__Bacillota;c__Bacilli;o__Lactobacillales;f__Aerococcaceae;g__Ruoffia;s__Ruoffia sp020112395	263	2076113	143474	24470	2820	287	86.56	2.48
MAG681	d__Archaea;p__Thermoproteota;c__Nitrososphaeria;o__Nitrososphaerales;f__Nitrososphaeraceae;g__JAFAQB01;s__Unclassified	262	2620615	70515	15402	4300	199	96.02	0.72
MAG390	d__Bacteria;p__Gemmatimonadota;c__Gemmatimonadetes;o__Gemmatimonadales;f__Gemmatimonadaceae;g__AG11;s__Unclassified	261	3578543	76330	24653	6143	322	94.26	2.31
MAG652	d__Bacteria;p__Actinomycetota;c__Actinomycetia;o__Actinomycetales;f__Micrococcaceae;g__Paeniglutamicibacter;s__Unclassified	259	4293546	265546	47403	5258	300	99.08	6.42
MAG906	d__Bacteria;p__Pseudomonadota;c__Gammaproteobacteria;o__Enterobacterales_A;f__Aeromonadaceae;g__Oceanisphaera;s__Unclassified	259	1730006	35275	7933	3427	298	58.97	3.37
MAG578	d__Bacteria;p__Actinomycetota;c__Actinomycetia;o__Mycobacteriales;f__Mycobacteriaceae;g__Gordonia;s__Unclassified	258	2302640	29623	10649	5146	305	62.96	0.93
MAG901	d__Bacteria;p__Pseudomonadota;c__Gammaproteobacteria;o__Burkholderiales;f__Burkholderiaceae_C;g__Paenalcaligenes;s__Unclassified	257	2251130	51221	16444	3812	299	95.97	1.51
MAG433	d__Bacteria;p__Bacillota;c__Bacilli;o__Bacillales;f__Planococcaceae;g__Sporosarcina;s__Unclassified	257	689626	32373	3309	1273	278	51.9	4.89
MAG590	d__Bacteria;p__Patescibacteria;c__Saccharimonadia;o__Saccharimonadales;f__UBA1547;g__JALRBM01;s__Unclassified	255	1189455	33794	6286	2160	218	96.22	2.47
MAG785	d__Bacteria;p__Actinomycetota;c__Actinomycetia;o__Propionibacteriales;f__Propionibacteriaceae;g__Arachnia;s__Unclassified	255	1630964	60183	8926	2867	286	64.44	1.35
MAG16	d__Bacteria;p__Actinomycetota;c__Actinomycetia;o__Actinomycetales;f__Cellulomonadaceae;g__Timonella;s__Unclassified	254	2499945	100145	17085	4082	302	77.19	4.99
MAG903	d__Bacteria;p__Actinomycetota;c__Actinomycetia;o__Actinomycetales;f__Dermatophilaceae;g__Unclassified;s__Unclassified	252	3824118	66440	20245	7374	315	89.11	2.2
MAG456	d__Bacteria;p__Actinomycetota;c__Thermoleophilia;o__Gaiellales;f__Gaiellaceae;g__PALSA-600;s__Unclassified	251	2937294	107755	17615	5418	284	82.07	1.27
MAG601	d__Bacteria;p__Actinomycetota;c__Thermoleophilia;o__Solirubrobacterales;f__Solirubrobacteraceae;g__Conexibacter;s__Unclassified	249	3337903	76339	20126	5748	291	95.56	1.92
MAG111	d__Bacteria;p__Deinococcota;c__Deinococci;o__Deinococcales;f__Trueperaceae;g__Unclassified;s__Unclassified	248	2181260	68027	14228	3660	306	96.36	0.94
MAG926	d__Bacteria;p__Actinomycetota;c__Actinomycetia;o__Actinomycetales;f__Microbacteriaceae;g__Unclassified;s__Unclassified	247	1493072	54562	10278	2353	295	95.73	3.39
MAG60	d__Bacteria;p__Bacillota;c__Bacilli;o__Bacillales;f__Planococcaceae;g__Sporosarcina;s__Unclassified	244	2898671	78414	19870	4945	282	85.28	1.84
MAG918	d__Bacteria;p__Actinomycetota;c__Actinomycetia;o__Mycobacteriales;f__Mycobacteriaceae;g__Mycobacterium;s__Unclassified	243	5244034	207271	38847	10032	291	99.99	2.35
MAG393	d__Bacteria;p__Bacteroidota;c__Bacteroidia;o__Flavobacteriales;f__Flavobacteriaceae;g__JAJYTI01;s__Unclassified	242	2357757	114839	15021	4448	308	87.45	0.13
MAG161	d__Bacteria;p__Actinomycetota;c__Actinomycetia;o__Actinomycetales;f__Micrococcaceae;g__Glutamicibacter;s__Glutamicibacter arilaitensis	240	2915490	129728	18953	5369	300	88.48	1.65
MAG256	d__Bacteria;p__Actinomycetota;c__Actinomycetia;o__Actinomycetales;f__Dermatophilaceae;g__Ornithinicoccus;s__Unclassified	239	4009585	110243	30233	6852	312	99.91	5.22
MAG1041	d__Bacteria;p__Actinomycetota;c__Actinomycetia;o__Actinomycetales;f__Actinomycetaceae;g__KH17;s__Unclassified	239	1745050	80241	14600	2751	300	88.38	0.25
MAG710	d__Bacteria;p__Chloroflexota;c__Limnocylindria;o__QHBO01;f__QHBO01;g__JACDBZ01;s__Unclassified	238	2063756	52175	14542	3667	287	82.14	2.15
MAG719	d__Bacteria;p__Actinomycetota;c__Thermoleophilia;o__Solirubrobacterales;f__70-9;g__VAYN01;s__Unclassified	237	2622803	69436	16087	5327	288	93.44	2.05
MAG369	d__Bacteria;p__Actinomycetota;c__Actinomycetia;o__Actinomycetales;f__Dermatophilaceae;g__Serinicoccus;s__Unclassified	235	2749032	75221	16691	5156	320	90.14	0.53
MAG946	d__Bacteria;p__Actinomycetota;c__Actinomycetia;o__Propionibacteriales;f__Propionibacteriaceae;g__Raineyella;s__Unclassified	233	2733086	109703	20294	4734	313	86.07	5.99
MAG239	d__Bacteria;p__Dormibacterota;c__Dormibacteria;o__Unclassified;f__Unclassified;g__Unclassified;s__Unclassified	232	2935834	81378	20558	5490	307	92.96	2.52
MAG5	d__Bacteria;p__Bacillota;c__Bacilli;o__Staphylococcales;f__Staphylococcaceae;g__Mammaliicoccus;s__Mammaliicoccus lentus	231	2244763	71834	15287	4545	288	92.65	1.72
MAG398	d__Bacteria;p__Pseudomonadota;c__Alphaproteobacteria;o__Sphingomonadales;f__Sphingomonadaceae;g__Sphingomonas_I;s__Unclassified	231	4361135	90001	29246	8489	298	97.16	1.01
MAG787	d__Bacteria;p__Bacillota_A;c__Clostridia;o__Tissierellales;f__Gottschalkiaceae;g__Andreesenia;s__Unclassified	230	1390247	68957	11873	2226	274	70.56	2.45
MAG819	d__Bacteria;p__Actinomycetota;c__Actinomycetia;o__Actinomycetales;f__Microbacteriaceae;g__Agrococcus;s__Unclassified	229	1983207	86368	14448	3712	298	62.45	1.98
MAG1094	d__Bacteria;p__Bacteroidota;c__Bacteroidia;o__Sphingobacteriales;f__Sphingobacteriaceae;g__Sphingobacterium;s__Unclassified	228	3114355	110387	20475	5702	330	85.93	0.72
MAG140	d__Bacteria;p__Actinomycetota;c__Actinomycetia;o__Actinomycetales;f__Microbacteriaceae;g__Microbacterium;s__Unclassified	227	2486702	93379	21216	5034	307	82.95	0.85
MAG544	d__Bacteria;p__Verrucomicrobiota;c__Verrucomicrobiae;o__Chthoniobacterales;f__Xiphinematobacteraceae;g__PSRL01;s__Unclassified	226	2544028	73706	16848	5238	312	95.89	1.3
MAG998	d__Bacteria;p__Actinomycetota;c__Actinomycetia;o__Propionibacteriales;f__Propionibacteriaceae;g__Arachnia;s__Unclassified	226	2817263	71881	18586	5382	324	86.39	1.95
MAG248	d__Bacteria;p__Bacillota_A;c__Clostridia;o__Peptostreptococcales;f__Anaerovoracaceae;g__VUNA01;s__VUNA01 sp002299625	226	1347880	51400	7750	2851	298	71.14	1.32
MAG1004	d__Bacteria;p__Bacillota;c__Bacilli;o__Lactobacillales;f__Enterococcaceae;g__Enterococcus_F;s__Unclassified	225	2897348	131647	38255	5845	277	100	4.77
MAG860	d__Bacteria;p__Pseudomonadota;c__Gammaproteobacteria;o__Pseudomonadales;f__Pseudomonadaceae;g__Thiopseudomonas;s__Thiopseudomonas sp012800475	224	1483151	25941	8127	3365	290	58.39	0.25
MAG258	d__Bacteria;p__Actinomycetota;c__Actinomycetia;o__Propionibacteriales;f__Propionibacteriaceae;g__Unclassified;s__Unclassified	223	1488671	24244	7724	3663	304	83.7	1.16
MAG508	d__Bacteria;p__Actinomycetota;c__Actinomycetia;o__Mycobacteriales;f__Mycobacteriaceae;g__Corynebacterium;s__Unclassified	222	2725497	143319	23889	5329	309	95.68	1.27
MAG78	d__Bacteria;p__Actinomycetota;c__Actinomycetia;o__Propionibacteriales;f__Propionibacteriaceae;g__Unclassified;s__Unclassified	221	3876619	122990	36732	8521	314	99.76	0.03
MAG355	d__Bacteria;p__Actinomycetota;c__Actinomycetia;o__Actinomycetales;f__Microbacteriaceae;g__NC76-1;s__Unclassified	218	1872963	58485	12783	3954	297	95.15	0.73
MAG71	d__Bacteria;p__Actinomycetota;c__UBA4738;o__CADDZG01;f__WHSQ01;g__Unclassified;s__Unclassified	216	3289247	263756	38619	5204	285	96.46	1.1
MAG313	d__Bacteria;p__Bacillota_A;c__Clostridia;o__Tissierellales;f__Tissierellaceae_A;g__Unclassified;s__Unclassified	215	2056026	79163	16282	4060	287	96.16	2.31
MAG698	d__Bacteria;p__Pseudomonadota;c__Alphaproteobacteria;o__Sphingomonadales;f__Sphingomonadaceae;g__Allosphingosinicella;s__Unclassified	212	3083844	67722	22411	7120	295	91.62	2.47
MAG667	d__Bacteria;p__Bacteroidota;c__Bacteroidia;o__Flavobacteriales;f__Flavobacteriaceae;g__Flavobacterium;s__Unclassified	210	2425292	59049	18786	5243	321	87.97	0.11
MAG389	d__Bacteria;p__Pseudomonadota;c__Alphaproteobacteria;o__Sphingomonadales;f__Sphingomonadaceae;g__Sphingomicrobium;s__Unclassified	210	3501750	92337	27612	7883	288	91.04	2.6
MAG1121	d__Bacteria;p__Bacillota;c__Bacilli;o__Erysipelotrichales;f__Erysipelotrichaceae;g__Erysipelothrix;s__Erysipelothrix sp012520695	209	760840	12853	4261	2007	254	54.51	0.92
MAG46	d__Bacteria;p__Acidobacteriota;c__Blastocatellia;o__Pyrinomonadales;f__Pyrinomonadaceae;g__UBA11740;s__Unclassified	206	4540741	140738	36048	12001	341	87	1.54
MAG517	d__Bacteria;p__Bacillota;c__Bacilli;o__Lactobacillales;f__Aerococcaceae;g__Fundicoccus;s__Unclassified	199	2380225	70772	23127	4746	307	86.27	7.55
MAG1124	d__Bacteria;p__Pseudomonadota;c__Gammaproteobacteria;o__Burkholderiales;f__Burkholderiaceae_C;g__Paenalcaligenes;s__Unclassified	199	1372309	32261	8552	3457	301	69.16	0.59
MAG890	d__Bacteria;p__Bacillota;c__Bacilli;o__Erysipelotrichales;f__Erysipelotrichaceae;g__Erysipelothrix;s__Unclassified	199	1104159	27589	6614	2955	283	75.77	4.12
MAG572	d__Bacteria;p__Actinomycetota;c__Actinomycetia;o__Actinomycetales;f__Microbacteriaceae;g__Leucobacter;s__Unclassified	197	1718462	62384	12021	3762	309	89.94	0.45
MAG268	d__Bacteria;p__Chloroflexota;c__UBA6077;o__UBA6077;f__CF-72;g__Unclassified;s__Unclassified	197	4708049	174595	41990	10890	328	92.69	3.21
MAG715	d__Bacteria;p__Acidobacteriota;c__Vicinamibacteria;o__Vicinamibacterales;f__UBA2999;g__JAMQPK01;s__Unclassified	196	5018655	189623	43505	12579	338	98.8	2.12
MAG418	d__Bacteria;p__Bacteroidota;c__Bacteroidia;o__Flavobacteriales;f__Weeksellaceae;g__Kaistella;s__Unclassified	196	2043015	63084	14959	4782	313	80.81	0.27
MAG1020	d__Bacteria;p__Bacillota;c__Bacilli;o__Lactobacillales;f__Lactobacillaceae;g__Lactobacillus;s__Lactobacillus johnsonii	196	1194148	33491	11093	2329	267	60.56	4.69
MAG558	d__Bacteria;p__Pseudomonadota;c__Alphaproteobacteria;o__Sphingomonadales;f__Sphingomonadaceae;g__Sphingomonas_I;s__Unclassified	195	4335995	162005	36408	11650	308	98.03	0.94
MAG498	d__Bacteria;p__Bacillota;c__Bacilli;o__Lactobacillales;f__Lactobacillaceae;g__Limosilactobacillus;s__Limosilactobacillus faecipullorum	194	1830705	75615	13012	4242	284	96.32	4.32
MAG837	d__Bacteria;p__Bacteroidota;c__Bacteroidia;o__Chitinophagales;f__Chitinophagaceae;g__Flavitalea;s__Flavitalea sp023437225	193	3920184	110907	32678	10813	354	94.96	0.88
MAG226	d__Bacteria;p__Eremiobacterota;c__Eremiobacteria;o__Baltobacterales;f__Baltobacteraceae;g__Unclassified;s__Unclassified	193	2580997	96185	28770	5435	305	91.24	0.38
MAG47	d__Bacteria;p__Bacillota;c__Bacilli;o__Lactobacillales;f__Enterococcaceae;g__Enterococcus_I;s__Enterococcus_I aquimarinus	192	1903826	64078	16140	4114	299	83.42	0.82
MAG978	d__Archaea;p__Thermoproteota;c__Nitrososphaeria;o__Nitrososphaerales;f__Nitrososphaeraceae;g__TA-21;s__Unclassified	192	1482252	38089	10130	3804	222	73.94	0.11
MAG964	d__Bacteria;p__Pseudomonadota;c__Gammaproteobacteria;o__Pseudomonadales;f__Pseudomonadaceae;g__Thiopseudomonas;s__Unclassified	188	2881672	137019	35991	8131	311	99.41	3.04
MAG299	d__Bacteria;p__Verrucomicrobiota;c__Verrucomicrobiae;o__Chthoniobacterales;f__UBA10450;g__CADDYX01;s__Unclassified	187	2664686	66657	20401	7210	321	98.55	1.58
MAG74	d__Bacteria;p__Pseudomonadota;c__Gammaproteobacteria;o__Enterobacterales_A;f__Alteromonadaceae;g__Aliidiomarina;s__Unclassified	187	1833124	58137	14135	4546	308	76.37	0.15
MAG1	d__Bacteria;p__Acidobacteriota;c__Thermoanaerobaculia;o__Gp7-AA8;f__Gp7-AA8;g__QHVT01;s__Unclassified	186	7414120	210902	69122	20367	365	98.02	2.6
MAG1134	d__Bacteria;p__Pseudomonadota;c__Gammaproteobacteria;o__Enterobacterales_A;f__Aeromonadaceae;g__Oceanisphaera;s__Oceanisphaera merdipullorum	185	3047353	137999	58853	12012	310	97.93	4.61
MAG970	d__Bacteria;p__Actinomycetota;c__Thermoleophilia;o__Solirubrobacterales;f__Solirubrobacteraceae;g__Unclassified;s__Unclassified	183	2328486	74245	18506	6297	292	93.86	0.2
MAG264	d__Bacteria;p__Chloroflexota;c__Limnocylindria;o__P2-11E;f__P2-11E;g__CF-39;s__Unclassified	183	2611669	118236	33599	6419	292	92.22	1.16
MAG279	d__Bacteria;p__Pseudomonadota;c__Gammaproteobacteria;o__Pseudomonadales;f__Pseudomonadaceae;g__Thiopseudomonas;s__Unclassified	182	2412974	92118	26436	6260	305	92.88	2.89
MAG343	d__Bacteria;p__Pseudomonadota;c__Gammaproteobacteria;o__Pseudomonadales;f__Pseudomonadaceae;g__Thiopseudomonas;s__Unclassified	181	1687887	50651	15300	3887	300	56.68	4.95
MAG786	d__Bacteria;p__Bacteroidota;c__Bacteroidia;o__Flavobacteriales;f__Flavobacteriaceae;g__JAJYTI01;s__Unclassified	179	2209492	116618	22539	5096	322	79.93	2.74
MAG189	d__Bacteria;p__Pseudomonadota;c__Alphaproteobacteria;o__Sphingomonadales;f__Sphingomonadaceae;g__Allosphingosinicella;s__Unclassified	178	3183480	99351	32240	8120	294	95.12	1.24
MAG1110	d__Bacteria;p__Bacillota;c__Bacilli;o__Lactobacillales;f__Vagococcaceae;g__Vagococcus;s__Unclassified	178	1792768	93748	16795	4335	310	86.65	0.86
MAG70	d__Bacteria;p__Bacillota;c__Bacilli;o__Lactobacillales;f__Carnobacteriaceae;g__Atopostipes;s__Unclassified	178	1091584	163462	10847	2337	268	55.47	0.83
MAG114	d__Bacteria;p__Dormibacterota;c__Dormibacteria;o__Dormibacterales;f__Dormibacteraceae;g__Unclassified;s__Unclassified	177	2626190	84625	23042	6710	294	90.76	0.41
MAG1015	d__Bacteria;p__Bacillota;c__Bacilli;o__Lactobacillales;f__Lactobacillaceae;g__Limosilactobacillus;s__Limosilactobacillus gallistercoris	176	1301821	59267	12364	3378	288	87.08	3.06
MAG907	d__Bacteria;p__Actinomycetota;c__Actinomycetia;o__Mycobacteriales;f__Mycobacteriaceae;g__Corynebacterium;s__Corynebacterium sp012838985	175	2368401	73257	26303	5651	298	99.68	1.02
MAG846	d__Bacteria;p__Bacillota;c__Bacilli;o__Lactobacillales;f__Lactobacillaceae;g__Lactobacillus;s__Lactobacillus gallinarum	175	1327527	52041	10112	3619	279	78.1	1.28
MAG929	d__Bacteria;p__Cyanobacteriota;c__Cyanobacteriia;o__Cyanobacteriales;f__Chroococcidiopsidaceae;g__Chroococcidiopsis;s__Chroococcidiopsis thermalis	174	6570771	258964	64219	17684	308	100	1.39
MAG224	d__Bacteria;p__Bacillota;c__Bacilli;o__Erysipelotrichales;f__Erysipelotrichaceae;g__Erysipelothrix;s__Erysipelothrix sp012520695	170	914028	27249	8446	2452	280	61.98	1.29
MAG810	d__Bacteria;p__Patescibacteria;c__Saccharimonadia;o__Saccharimonadales;f__UBA10212;g__JACDFN01;s__Unclassified	167	721307	18694	6046	2056	256	85.67	4.44
MAG551	d__Bacteria;p__Pseudomonadota;c__Alphaproteobacteria;o__Sphingomonadales;f__Sphingomonadaceae;g__Allosphingosinicella;s__Unclassified	164	3166878	99456	30099	9442	288	93.77	0.62
MAG505	d__Bacteria;p__Bacteroidota;c__Bacteroidia;o__Sphingobacteriales;f__Sphingobacteriaceae;g__Sphingobacterium;s__Sphingobacterium sp012030425	163	5812914	535297	92041	16746	341	99.99	0.17
MAG527	d__Bacteria;p__Actinomycetota;c__Thermoleophilia;o__Solirubrobacterales;f__70-9;g__Unclassified;s__Unclassified	161	2407428	82723	22549	6803	301	90.9	3.52
MAG345	d__Bacteria;p__Bacteroidota;c__Bacteroidia;o__Flavobacteriales;f__Flavobacteriaceae;g__Flavobacterium;s__Unclassified	161	3255620	217015	36489	9297	337	95.33	0.84
MAG783	d__Bacteria;p__Bacillota;c__Bacilli;o__Lactobacillales;f__Lactobacillaceae;g__Limosilactobacillus;s__Limosilactobacillus reuteri	161	1762620	55155	21504	4246	285	92.61	0.54
MAG1026	d__Bacteria;p__Dormibacterota;c__Dormibacteria;o__Unclassified;f__Unclassified;g__Unclassified;s__Unclassified	161	1797405	60609	16597	5293	307	70.62	3.05
MAG1135	d__Bacteria;p__Acidobacteriota;c__Thermoanaerobaculia;o__UBA5704;f__UBA5704;g__UBA5704;s__Unclassified	159	9307146	686395	156846	43307	411	97.56	5.27
MAG951	d__Bacteria;p__Actinomycetota;c__Actinomycetia;o__Mycobacteriales;f__Jatrophihabitantaceae;g__Jatrophihabitans_A;s__Unclassified	159	4174734	163191	44823	13417	327	98.79	1.84
MAG366	d__Bacteria;p__Patescibacteria;c__Saccharimonadia;o__Saccharimonadales;f__UBA4665;g__Unclassified;s__Unclassified	158	818148	53314	8198	1956	237	83.51	0.95
MAG480	d__Bacteria;p__Patescibacteria;c__Saccharimonadia;o__Saccharimonadales;f__Nanosynbacteraceae;g__Nanosynbacter;s__Unclassified	158	877910	21265	7363	2695	273	84.93	1.03
MAG660	d__Bacteria;p__Pseudomonadota;c__Alphaproteobacteria;o__Sphingomonadales;f__Sphingomonadaceae;g__Allosphingosinicella;s__Unclassified	156	3224225	119893	38895	11359	297	94.1	4.9
MAG611	d__Bacteria;p__Bacillota;c__Bacilli;o__Lactobacillales;f__Aerococcaceae;g__Jeotgalibaca;s__Jeotgalibaca porci	156	1058697	40492	10020	2975	286	52.76	2.22
MAG672	d__Bacteria;p__Actinomycetota;c__Acidimicrobiia;o__UBA5794;f__ZC4RG35;g__JACZUI01;s__Unclassified	155	3013127	145794	40266	9005	298	96.07	2.35
MAG700	d__Bacteria;p__Pseudomonadota;c__Gammaproteobacteria;o__Xanthomonadales;f__Xanthomonadaceae;g__Lysobacter_G;s__Unclassified	153	2548812	88707	27665	8793	308	91.31	1.33
MAG1052	d__Bacteria;p__Bacillota;c__Bacilli;o__Erysipelotrichales;f__Erysipelotrichaceae;g__JAAZDN01;s__Unclassified	153	1321302	53441	13064	3515	297	84.43	1
MAG815	d__Bacteria;p__Bacteroidota;c__Bacteroidia;o__Chitinophagales;f__Chitinophagaceae;g__JAFAGI01;s__JAFAGI01 sp023386235	151	2870977	135721	30888	9049	332	98.83	0.84
MAG330	d__Bacteria;p__Bacillota;c__Bacilli;o__Lactobacillales;f__Carnobacteriaceae;g__Desemzia;s__Unclassified	151	2057252	129785	30693	5497	289	87.19	3.14
MAG484	d__Bacteria;p__Pseudomonadota;c__Gammaproteobacteria;o__Cardiobacteriales;f__Wohlfahrtiimonadaceae;g__Ignatzschineria;s__Unclassified	149	1781937	78669	25214	5411	302	85.07	0.25
MAG734	d__Bacteria;p__Patescibacteria;c__Microgenomatia;o__Levybacterales;f__UBA12049;g__PRDT01;s__Unclassified	148	1177138	36163	13308	3268	271	96.17	2.08
MAG338	d__Bacteria;p__Verrucomicrobiota;c__Verrucomicrobiae;o__Verrucomicrobiales;f__Akkermansiaceae;g__Luteolibacter;s__Unclassified	148	4873652	161179	51169	16036	349	97.06	0.94
MAG284	d__Bacteria;p__Bacillota;c__Bacilli;o__Lactobacillales;f__Enterococcaceae;g__Enterococcus_B;s__Enterococcus_B faecium	147	2074740	98544	25114	6740	300	85.21	0.32
MAG630	d__Bacteria;p__Pseudomonadota;c__Gammaproteobacteria;o__Burkholderiales;f__Burkholderiaceae_C;g__Paenalcaligenes;s__Unclassified	146	2437030	134504	28694	7325	315	90.13	8.25
MAG809	d__Bacteria;p__Actinomycetota;c__Actinomycetia;o__Mycobacteriales;f__Mycobacteriaceae;g__Corynebacterium;s__Unclassified	144	3388026	158611	61459	16049	319	94.42	5.22
MAG519	d__Bacteria;p__Pseudomonadota;c__Gammaproteobacteria;o__Burkholderiales;f__Burkholderiaceae;g__Noviherbaspirillum_B;s__Unclassified	143	5584878	203374	70841	19100	327	91.92	1.24
MAG265	d__Bacteria;p__Acidobacteriota;c__Vicinamibacteria;o__Vicinamibacterales;f__UBA2999;g__JACCSI01;s__Unclassified	142	3347182	99085	31534	12748	342	81.48	0.94
MAG100	d__Bacteria;p__Bacteroidota;c__Bacteroidia;o__AKYH767;f__2-12-FULL-35-15;g__2-12-FULL-35-15;s__Unclassified	141	3181155	109760	45594	12426	338	98.37	0.06
MAG152	d__Bacteria;p__Bacteroidota;c__Bacteroidia;o__Flavobacteriales;f__Flavobacteriaceae;g__JAJYTI01;s__Unclassified	141	2584402	154457	63649	10692	325	90.74	2.15
MAG1024	d__Bacteria;p__Actinomycetota;c__Actinomycetia;o__Actinomycetales;f__Dermatophilaceae;g__Unclassified;s__Unclassified	141	3987852	191876	41786	13783	326	94.14	1.78
MAG742	d__Bacteria;p__Bacillota;c__Bacilli;o__Erysipelotrichales;f__Erysipelotrichaceae;g__Erysipelothrix;s__Erysipelothrix sp002358955	139	1272437	75287	13703	4224	302	79.35	0.4
MAG275	d__Bacteria;p__Bacillota;c__Bacilli;o__Lactobacillales;f__Lactobacillaceae;g__Limosilactobacillus;s__Limosilactobacillus intestinipullorum	139	1460853	60642	17380	5979	302	92.4	0.86
MAG1038	d__Bacteria;p__Bacillota;c__Bacilli;o__Bacillales;f__Planococcaceae;g__Sporosarcina;s__Sporosarcina quadrami	137	3187064	108287	50891	9396	289	89.45	1.68
MAG1086	d__Bacteria;p__Acidobacteriota;c__Blastocatellia;o__Pyrinomonadales;f__Pyrinomonadaceae;g__OLB17;s__Unclassified	136	3213879	251101	42727	11111	337	97.15	0.96
MAG235	d__Bacteria;p__Patescibacteria;c__Saccharimonadia;o__Saccharimonadales;f__EFPC-124;g__EFPC-124;s__Unclassified	135	1015455	56772	10560	3808	257	95.99	0.28
MAG30	d__Bacteria;p__Actinomycetota;c__Actinomycetia;o__Mycobacteriales;f__Mycobacteriaceae;g__Corynebacterium;s__Unclassified	132	2146167	87540	26429	8191	313	86.04	1
MAG107	d__Bacteria;p__Actinomycetota;c__Actinomycetia;o__Actinomycetales;f__Micrococcaceae;g__Sinomonas;s__Unclassified	132	3729784	143270	45902	13484	314	99.81	0.32
MAG205	d__Bacteria;p__Patescibacteria;c__SICC01;o__SICC01;f__SICC01;g__Unclassified;s__Unclassified	131	638845	24252	6186	2440	250	88.37	1.28
MAG755	d__Bacteria;p__Patescibacteria;c__Paceibacteria;o__Moranbacterales;f__UBA1568;g__UBA1568;s__Unclassified	130	654587	20773	6641	2585	271	89.01	1.11
MAG883	d__Bacteria;p__Actinomycetota;c__Thermoleophilia;o__Solirubrobacterales;f__70-9;g__VAYN01;s__Unclassified	129	2656666	90470	33962	10649	291	97.23	0.35
MAG832	d__Bacteria;p__Bacteroidota;c__Bacteroidia;o__Chitinophagales;f__Chitinophagaceae;g__Segetibacter;s__Unclassified	126	3486022	130834	48363	13237	329	99.13	0.95
MAG371	d__Bacteria;p__Pseudomonadota;c__Alphaproteobacteria;o__Sphingomonadales;f__Sphingomonadaceae;g__Allosphingosinicella;s__Unclassified	125	3001254	146143	38156	12504	292	97.18	0.51
MAG1092	d__Bacteria;p__Pseudomonadota;c__Alphaproteobacteria;o__Sphingomonadales;f__Sphingomonadaceae;g__Allosphingosinicella;s__Unclassified	125	3410897	156205	50913	12560	305	96.79	2.01
MAG500	d__Bacteria;p__Pseudomonadota;c__Gammaproteobacteria;o__Pseudomonadales;f__Cellvibrionaceae;g__Gilvimarinus;s__Unclassified	123	2955855	155868	38509	14375	328	91.16	0.08
MAG694	d__Bacteria;p__Acidobacteriota;c__Thermoanaerobaculia;o__UBA5704;f__UBA5704;g__UBA5704;s__Unclassified	121	7064299	223218	95961	34101	393	100	2.55
MAG1014	d__Bacteria;p__Pseudomonadota;c__Gammaproteobacteria;o__Xanthomonadales;f__Xanthomonadaceae;g__Lysobacter;s__Unclassified	118	4076838	311014	70038	21853	342	99.84	0.34
MAG800	d__Bacteria;p__Bacteroidota;c__Bacteroidia;o__Flavobacteriales;f__Flavobacteriaceae;g__Flavobacterium;s__Unclassified	118	2579997	101770	42526	11529	316	92.34	1.37
MAG731	d__Bacteria;p__Pseudomonadota;c__Alphaproteobacteria;o__Sphingomonadales;f__Sphingomonadaceae;g__Sphingomicrobium;s__Unclassified	115	1729285	87411	35860	6436	293	71.07	4.2
MAG259	d__Bacteria;p__Actinomycetota;c__Actinomycetia;o__Actinomycetales;f__Microbacteriaceae;g__Microbacterium;s__Unclassified	112	2820185	166042	80174	18055	305	94.96	1.08
MAG552	d__Bacteria;p__Bacillota;c__Bacilli;o__Staphylococcales;f__Staphylococcaceae;g__Staphylococcus;s__Staphylococcus equorum	109	2425361	289723	62765	8715	293	98.01	0.15
MAG449	d__Bacteria;p__Actinomycetota;c__Actinomycetia;o__Mycobacteriales;f__Mycobacteriaceae;g__Corynebacterium;s__Corynebacterium faecigallinarum	107	2759836	186398	59425	12241	322	93.2	1.78
MAG362	d__Bacteria;p__Bacillota;c__Bacilli;o__Lactobacillales;f__Streptococcaceae;g__Streptococcus;s__Streptococcus alactolyticus	105	1458263	63599	23783	7017	294	99.97	0.04
MAG274	d__Bacteria;p__Patescibacteria;c__Doudnabacteria;o__UBA920;f__2-02-FULL-46-11;g__Unclassified;s__Unclassified	100	736644	35325	10606	3154	280	92.22	0.1
MAG392	d__Bacteria;p__Bacteroidota;c__Bacteroidia;o__Flavobacteriales;f__Weeksellaceae;g__Moheibacter;s__Unclassified	97	2655262	205843	94256	15536	325	93.33	2.31
MAG379	d__Bacteria;p__Patescibacteria;c__Saccharimonadia;o__Saccharimonadales;f__UBA1547;g__JALRBM01;s__Unclassified	96	529760	36119	10635	2415	242	52.02	2.11
MAG21	d__Bacteria;p__Pseudomonadota;c__Gammaproteobacteria;o__Xanthomonadales;f__Rhodanobacteraceae;g__Oleiagrimonas;s__Unclassified	92	3066570	241003	59456	20050	329	98.87	0.5
MAG525	d__Bacteria;p__Actinomycetota;c__Thermoleophilia;o__Solirubrobacterales;f__70-9;g__VRUE01;s__Unclassified	91	2216385	120793	40073	14559	302	98.38	2.04
MAG662	d__Bacteria;p__Pseudomonadota;c__Alphaproteobacteria;o__Sphingomonadales;f__Sphingomonadaceae;g__Sphingomicrobium;s__Unclassified	90	1767990	82642	34904	10256	294	85.51	3.09
MAG199	d__Bacteria;p__Actinomycetota;c__Actinomycetia;o__Mycobacteriales;f__Mycobacteriaceae;g__Corynebacterium;s__Corynebacterium crudilactis	89	2676200	218372	49659	13457	317	89.98	0.02
MAG1107	d__Bacteria;p__Patescibacteria;c__Saccharimonadia;o__Saccharimonadales;f__UBA10212;g__JAIFWC01;s__Unclassified	89	397235	15713	4947	2673	247	50.95	0.13
MAG568	d__Bacteria;p__Patescibacteria;c__Saccharimonadia;o__Saccharimonadales;f__UBA1547;g__Unclassified;s__Unclassified	86	656053	36103	10629	3516	256	71.02	4.73
MAG841	d__Bacteria;p__Bacillota;c__Bacilli;o__Lactobacillales;f__Lactobacillaceae;g__Limosilactobacillus;s__Limosilactobacillus vaginalis	83	985948	67366	19633	5509	309	66.34	0.32
MAG1056	d__Bacteria;p__Pseudomonadota;c__Alphaproteobacteria;o__Sphingomonadales;f__Sphingomonadaceae;g__Allosphingosinicella;s__Unclassified	82	3238359	188004	87536	22030	296	99.99	0.87
MAG939	d__Bacteria;p__Patescibacteria;c__Saccharimonadia;o__Saccharimonadales;f__UBA4665;g__UBA4665;s__Unclassified	80	977233	42158	16915	6186	277	79.7	0.16
MAG992	d__Bacteria;p__Patescibacteria;c__Saccharimonadia;o__Saccharimonadales;f__UBA4665;g__Unclassified;s__Unclassified	77	564893	20954	7953	4736	255	65.92	2.15
MAG859	d__Bacteria;p__Patescibacteria;c__Saccharimonadia;o__Saccharimonadales;f__UBA4665;g__Unclassified;s__Unclassified	75	839799	78745	25111	4524	258	85.24	0.47
MAG521	d__Bacteria;p__Acidobacteriota;c__Terriglobia;o__Terriglobales;f__Gp1-AA117;g__Angelobacter;s__Unclassified	75	4881675	315404	114760	33329	322	99.73	0.04
MAG334	d__Bacteria;p__Patescibacteria;c__Saccharimonadia;o__Saccharimonadales;f__UBA1547;g__JAEWBQ01;s__Unclassified	73	759187	46242	12971	4449	274	84.97	7.76
MAG123	d__Bacteria;p__Patescibacteria;c__Saccharimonadia;o__Saccharimonadales;f__UBA5946;g__UBA5946;s__Unclassified	72	499209	17506	8688	3805	260	71.7	0.98
MAG535	d__Bacteria;p__Pseudomonadota;c__Alphaproteobacteria;o__Sphingomonadales;f__Sphingomonadaceae;g__Allosphingosinicella;s__Unclassified	70	3580911	324045	82686	36951	306	99.98	0.58
MAG1064	d__Bacteria;p__Acidobacteriota;c__Thermoanaerobaculia;o__Gp7-AA8;f__Gp7-AA8;g__QHVT01;s__Unclassified	67	6131549	372690	131437	46770	377	100	0.43
MAG80	d__Bacteria;p__Actinomycetota;c__Thermoleophilia;o__Solirubrobacterales;f__70-9;g__JAJKHV01;s__Unclassified	67	2785303	284100	120827	27548	315	92.44	1.12
MAG426	d__Bacteria;p__Actinomycetota;c__Thermoleophilia;o__Solirubrobacterales;f__70-9;g__VAYN01;s__Unclassified	66	2680946	207029	64723	24078	300	95.28	1.17
MAG1090	d__Bacteria;p__Patescibacteria;c__Saccharimonadia;o__Saccharimonadales;f__Unclassified;g__Unclassified;s__Unclassified	66	586116	32019	9930	4428	266	76.24	0.83
MAG470	d__Archaea;p__Thermoproteota;c__Nitrososphaeria;o__Nitrososphaerales;f__Nitrosopumilaceae;g__Nitrosotenuis;s__Unclassified	64	1468114	202350	42110	12106	251	94.83	0.21
MAG584	d__Bacteria;p__Patescibacteria;c__Saccharimonadia;o__Saccharimonadales;f__UBA1547;g__JAEWBQ01;s__Unclassified	64	1031962	126600	54305	9911	272	98.8	0.1
MAG72	d__Bacteria;p__Patescibacteria;c__Saccharimonadia;o__Saccharimonadales;f__UBA5946;g__Unclassified;s__Unclassified	62	788726	96860	73080	4522	269	80.2	5.47
MAG93	d__Bacteria;p__Patescibacteria;c__Saccharimonadia;o__Saccharimonadales;f__UBA1547;g__JAEWBQ01;s__Unclassified	62	688036	55922	14100	5413	282	72.95	1.75
MAG689	d__Bacteria;p__Bacteroidota;c__Bacteroidia;o__Chitinophagales;f__Chitinophagaceae;g__JAFAEM01;s__Unclassified	58	4979468	557391	164818	52927	355	100	0.47
MAG638	d__Bacteria;p__Bacteroidota;c__Bacteroidia;o__Flavobacteriales;f__Flavobacteriaceae;g__Flavobacterium;s__Unclassified	57	2969042	285249	86951	30473	338	98.39	0.39
MAG281	d__Bacteria;p__Pseudomonadota;c__Alphaproteobacteria;o__Sphingomonadales;f__Sphingomonadaceae;g__Novosphingobium;s__Unclassified	56	1984476	182440	78870	27052	308	71.46	0.94
MAG318	d__Bacteria;p__Patescibacteria;c__Saccharimonadia;o__Saccharimonadales;f__UBA4665;g__Unclassified;s__Unclassified	56	348338	27816	6875	3438	237	57.19	0.27
MAG545	d__Bacteria;p__Pseudomonadota;c__Alphaproteobacteria;o__Sphingomonadales;f__Sphingomonadaceae;g__Allosphingosinicella;s__Unclassified	54	3778679	269344	107408	37166	312	99.37	2.21
MAG852	d__Bacteria;p__Pseudomonadota;c__Gammaproteobacteria;o__Xanthomonadales;f__Rhodanobacteraceae;g__Oleiagrimonas;s__Unclassified	52	3209343	347032	109073	24229	339	98.48	0.05
MAG514	d__Bacteria;p__Bacteroidota;c__Bacteroidia;o__Flavobacteriales;f__Weeksellaceae;g__Moheibacter;s__Unclassified	51	2959821	193007	120256	45361	318	99.27	0.05
MAG838	d__Bacteria;p__Patescibacteria;c__Saccharimonadia;o__Saccharimonadales;f__UBA10212;g__JAIFWC01;s__Unclassified	44	768043	104819	31288	7059	285	93.94	0.28
MAG1046	d__Bacteria;p__Actinomycetota;c__Thermoleophilia;o__Solirubrobacterales;f__70-9;g__VAYN01;s__Unclassified	43	2736683	555485	213846	49066	314	94.92	2.5
MAG1006	d__Bacteria;p__Pseudomonadota;c__Alphaproteobacteria;o__Sphingomonadales;f__Sphingomonadaceae;g__Sphingomicrobium;s__Unclassified	42	2500010	312276	118353	29188	301	99.91	0.22
MAG703	d__Bacteria;p__Patescibacteria;c__Saccharimonadia;o__Saccharimonadales;f__UBA5946;g__Unclassified;s__Unclassified	41	387627	22660	10135	6108	258	51.02	0.2
MAG34	d__Bacteria;p__Actinomycetota;c__Thermoleophilia;o__Solirubrobacterales;f__70-9;g__VAYN01;s__Unclassified	40	2794018	534048	141787	48165	312	99.66	1.42
MAG169	d__Bacteria;p__Patescibacteria;c__Saccharimonadia;o__Saccharimonadales;f__UBA4665;g__JAGQNO01;s__Unclassified	40	735026	61891	26615	9484	267	87.31	0
MAG866	d__Bacteria;p__Actinomycetota;c__Thermoleophilia;o__Solirubrobacterales;f__70-9;g__VAYN01;s__Unclassified	34	2776791	310389	177023	45433	315	95.75	1.46
MAG166	d__Bacteria;p__Bacteroidota;c__Bacteroidia;o__Chitinophagales;f__Chitinophagaceae;g__Unclassified;s__Unclassified	31	3997691	768723	176256	71667	350	99.96	0
MAG496	d__Bacteria;p__Patescibacteria;c__Saccharimonadia;o__Saccharimonadales;f__UBA1020;g__UBA1020;s__Unclassified	28	852690	92773	65971	23376	279	99.6	0.2
MAG751	d__Bacteria;p__Pseudomonadota;c__Gammaproteobacteria;o__Pseudomonadales;f__Spongiibacteraceae;g__Unclassified;s__Unclassified	28	2959162	375623	175692	54740	321	92.04	0.01
MAG743	d__Bacteria;p__Actinomycetota;c__Thermoleophilia;o__Solirubrobacterales;f__70-9;g__Unclassified;s__Unclassified	25	2542247	382402	166761	41271	310	93.71	3.44
MAG167	d__Bacteria;p__Acidobacteriota;c__Blastocatellia;o__Pyrinomonadales;f__Pyrinomonadaceae;g__JAIBCC01;s__Unclassified	25	4387538	829011	293263	97727	348	84.55	1.67
MAG51	d__Bacteria;p__Patescibacteria;c__Paceibacteria;o__UBA9983_A;f__UBA2103;g__C7867-001;s__Unclassified	23	770296	356672	258765	31323	273	100	0.03
MAG471	d__Bacteria;p__Cyanobacteriota;c__Cyanobacteriia;o__Gloeomargaritales;f__Unclassified;g__Unclassified;s__Unclassified	19	109573	16944	9338	3667	216	51.28	0
MAG486	d__Bacteria;p__Actinomycetota;c__Thermoleophilia;o__Solirubrobacterales;f__70-9;g__VAYN01;s__Unclassified	16	2602467	422777	186466	115388	313	95.18	1.28
MAG1013	d__Bacteria;p__Patescibacteria;c__Saccharimonadia;o__Saccharimonadales;f__Saccharimonadaceae;g__Saccharimonas;s__Unclassified	1	834282	834282	834282	834282	287	98.49	0.08
