# Supplementary material for: Insights into antibiotic resistomes from metagenome-assembled genomes and gene catalogs of soil microbiota across environments
Source: PeerJ. 2025 Nov 19;13:e20348. doi: 10.7717/peerj.20348 (PMC12640132; doi:10.7717/peerj.20348)
Supplement: Supplemental Information 8 [file peerj-13-20348-s008.xlsx]

## Sheet: Genomic statistics results
Table S3: Genomic statistics results.
Genome	Taxonomy	G + C(%)	Total Contig No.	Total Bases in Contig(bp)	Large Contig No.	Large Contig Base(bp)	Largest Contig Length（bp）	Contig N50(bp)	Contig N90(bp)	N Rate(%)	CDS Gene No.	GeneTotal Len(bp)	Gene Average Len(bp)	Gene Density	GC Content in Gene Region（%）	Gene Len/Genome Len（%）	Intergenetic region length（bp）	GC content in intergenetic region(%)	Intergenetic Region Len/Genome Len（%）	tRNA No.
MAG1	d__Bacteria;p__Acidobacteriota;c__Thermoanaerobaculia;o__Gp7-AA8;f__Gp7-AA8;g__QHVT01;s__Unclassified	65.74	186	7414120	186	7414120	210902	69122	20367	0	6181	6759132	1094	0.83	66.25	91.17	654988	60.39	8.83	50
MAG10	d__Bacteria;p__Actinomycetota;c__Actinomycetia;o__Actinomycetales;f__Actinomycetaceae;g__Flaviflexus;s__Unclassified	61.57	574	1705186	574	1705186	21070	3831	1469	0	2024	1554582	768	1.19	62.09	91.17	150604	56.26	8.83	28
MAG100	d__Bacteria;p__Bacteroidota;c__Bacteroidia;o__AKYH767;f__2-12-FULL-35-15;g__2-12-FULL-35-15;s__Unclassified	31.86	141	3181155	141	3181155	109760	45594	12426	0	2797	2835180	1014	0.88	32.71	89.12	345975	24.96	10.88	33
MAG1000	d__Bacteria;p__Actinomycetota;c__Thermoleophilia;o__Gaiellales;f__Gaiellaceae;g__Palsa-739;s__Unclassified	70.33	499	1563706	499	1563706	11480	3526	1853	0	2112	1458990	691	1.35	70.49	93.3	104716	68.11	6.7	34
MAG1001	d__Bacteria;p__Actinomycetota;c__Actinomycetia;o__Propionibacteriales;f__Nocardioidaceae;g__Nocardioides;s__Unclassified	71.36	360	3944903	360	3944903	69412	15459	4893	0	4055	3617979	892	1.03	71.62	91.71	326924	68.58	8.29	46
MAG1002	d__Bacteria;p__Bacillota;c__Bacilli;o__Staphylococcales;f__Staphylococcaceae;g__Mammaliicoccus;s__Mammaliicoccus sciuri	33.64	1053	1480207	1053	1480207	4180	1347	1056	0	2163	1266837	586	1.46	34.24	85.59	213370	30.03	14.41	41
MAG1003	d__Bacteria;p__Bacteroidota;c__Bacteroidia;o__Flavobacteriales;f__Weeksellaceae;g__Kaistella;s__Unclassified	39.57	727	2484897	727	2484897	35977	4581	1537	0	2838	2242305	790	1.14	40.5	90.24	242592	30.92	9.76	27
MAG1004	d__Bacteria;p__Bacillota;c__Bacilli;o__Lactobacillales;f__Enterococcaceae;g__Enterococcus_F;s__Unclassified	35.37	225	2897348	225	2897348	131647	38255	5845	0	2940	2445930	832	1.01	36.04	84.42	451418	31.72	15.58	36
MAG1005	d__Bacteria;p__Actinomycetota;c__Thermoleophilia;o__Gaiellales;f__Gaiellaceae;g__JACCRW01;s__Unclassified	71.87	355	2322754	355	2322754	40804	8964	3082	0	2695	2205984	819	1.16	72.05	94.97	116770	68.33	5.03	26
MAG1006	d__Bacteria;p__Pseudomonadota;c__Alphaproteobacteria;o__Sphingomonadales;f__Sphingomonadaceae;g__Sphingomicrobium;s__Unclassified	62.29	42	2500010	42	2500010	312276	118353	29188	0	2542	2294745	903	1.02	62.52	91.79	205265	59.71	8.21	45
MAG1007	d__Bacteria;p__Pseudomonadota;c__Gammaproteobacteria;o__Pseudomonadales;f__Pseudomonadaceae;g__Stutzerimonas;s__Stutzerimonas stutzeri_AK	62.56	681	2979817	681	2979817	22817	5245	2381	0	3259	2663088	817	1.09	63.19	89.37	316729	57.23	10.63	36
MAG1008	d__Bacteria;p__Pseudomonadota;c__Alphaproteobacteria;o__Rhodobacterales;f__Rhodobacteraceae;g__Paracoccus;s__Paracoccus alcaliphilus	65.28	380	2406798	380	2406798	76759	7296	3268	0	2580	2220129	861	1.07	65.66	92.24	186669	60.84	7.76	12
MAG1009	d__Archaea;p__Thermoproteota;c__Nitrososphaeria;o__Nitrososphaerales;f__Nitrososphaeraceae;g__TH1177;s__Unclassified	28.87	735	2341486	735	2341486	22842	3489	1759	0	2887	1712589	593	1.23	30.95	73.14	628897	23.22	26.86	16
MAG101	d__Bacteria;p__Pseudomonadota;c__Gammaproteobacteria;o__Burkholderiales;f__Burkholderiaceae_B;g__Ramlibacter;s__Unclassified	70.23	735	3494309	735	3494309	25454	5957	2345	0	4031	3249081	806	1.15	70.38	92.98	245228	68.28	7.02	36
MAG1010	d__Bacteria;p__Bacillota_A;c__Clostridia;o__Lachnospirales;f__Lachnospiraceae;g__UBA2868;s__UBA2868 sp004552595	39.17	784	1210256	784	1210256	8425	1516	1082	0	1719	1123233	653	1.42	39.63	92.81	87023	33.15	7.19	18
MAG1011	d__Bacteria;p__Pseudomonadota;c__Alphaproteobacteria;o__Sphingomonadales;f__Sphingomonadaceae;g__Allosphingosinicella;s__Unclassified	69.14	765	3265373	765	3265373	27463	5188	2248	0	3784	2972073	785	1.16	69.54	91.02	293300	65.14	8.98	43
MAG1012	d__Bacteria;p__Actinomycetota;c__Actinomycetia;o__Actinomycetales;f__Microbacteriaceae;g__Microbacterium;s__Microbacterium sp019061125	62.75	491	2086583	491	2086583	18900	5208	2235	0	2337	1926669	824	1.12	62.94	92.34	159914	60.39	7.66	31
MAG1013	d__Bacteria;p__Patescibacteria;c__Saccharimonadia;o__Saccharimonadales;f__Saccharimonadaceae;g__Saccharimonas;s__Unclassified	50.54	1	834282	1	834282	834282	834282	834282	0	891	767739	862	1.07	51.24	92.02	66543	42.43	7.98	40
MAG1014	d__Bacteria;p__Pseudomonadota;c__Gammaproteobacteria;o__Xanthomonadales;f__Xanthomonadaceae;g__Lysobacter;s__Unclassified	64.96	118	4076838	118	4076838	311014	70038	21853	0	3527	3623049	1027	0.87	65.23	88.87	453789	62.84	11.13	46
MAG1015	d__Bacteria;p__Bacillota;c__Bacilli;o__Lactobacillales;f__Lactobacillaceae;g__Limosilactobacillus;s__Limosilactobacillus gallistercoris	52.89	176	1301821	176	1301821	59267	12364	3378	0	1348	1164999	864	1.04	54.55	89.49	136822	38.78	10.51	23
MAG1016	d__Bacteria;p__Chloroflexota;c__Limnocylindria;o__QHBO01;f__QHBO01;g__JACDBZ01;s__Unclassified	71.15	433	1758344	433	1758344	18451	4903	2005	0	2062	1632789	792	1.17	71.28	92.86	125555	69.41	7.14	35
MAG1017	d__Bacteria;p__Pseudomonadota;c__Gammaproteobacteria;o__Pseudomonadales;f__Moraxellaceae;g__Acinetobacter;s__Acinetobacter pseudolwoffii	44.21	542	2268326	542	2268326	22484	5241	2079	0	2510	1966419	783	1.11	45.73	86.69	301907	34.32	13.31	40
MAG1018	d__Bacteria;p__Pseudomonadota;c__Gammaproteobacteria;o__Pseudomonadales;f__Moraxellaceae;g__Acinetobacter;s__Acinetobacter bohemicus	39.41	475	2811018	475	2811018	33824	6965	3090	0	2990	2412234	807	1.06	40.69	85.81	398784	31.67	14.19	34
MAG1019	d__Bacteria;p__Actinomycetota;c__Actinomycetia;o__Mycobacteriales;f__Mycobacteriaceae;g__Corynebacterium;s__Corynebacterium variabile	67.99	458	2407012	458	2407012	32664	6719	2640	0	2549	2213373	868	1.06	68.41	91.96	193639	63.1	8.04	43
MAG102	d__Bacteria;p__Tectomicrobia;c__Entotheonellia;o__Entotheonellales;f__Entotheonellaceae;g__SXND01;s__Unclassified	59.27	1987	4854886	1987	4854886	10120	2671	1481	0	6090	4186953	688	1.25	59.68	86.24	667933	56.71	13.76	32
MAG1020	d__Bacteria;p__Bacillota;c__Bacilli;o__Lactobacillales;f__Lactobacillaceae;g__Lactobacillus;s__Lactobacillus johnsonii	34.18	196	1194148	196	1194148	33491	11093	2329	0	1313	1051653	801	1.1	34.8	88.07	142495	29.57	11.93	23
MAG1021	d__Archaea;p__Thermoproteota;c__Nitrososphaeria;o__Nitrososphaerales;f__Nitrososphaeraceae;g__TH1177;s__Unclassified	29.17	918	1575799	918	1575799	7513	1727	1122	0	2210	1231794	557	1.4	30.79	78.17	344005	23.36	21.83	14
MAG1022	d__Bacteria;p__Planctomycetota;c__Planctomycetia;o__Isosphaerales;f__Isosphaeraceae;g__Paludisphaera;s__Unclassified	68.61	1511	2607115	1511	2607115	7357	1778	1127	0	3238	2324550	718	1.24	68.76	89.16	282565	67.43	10.84	22
MAG1023	d__Bacteria;p__Acidobacteriota;c__Thermoanaerobaculia;o__UBA5704;f__UBA5704;g__UBA5704;s__Unclassified	68.27	2015	7130304	2015	7130304	65524	4531	1660	0	7114	6625086	931	1	68.75	92.91	505218	62	7.09	48
MAG1024	d__Bacteria;p__Actinomycetota;c__Actinomycetia;o__Actinomycetales;f__Dermatophilaceae;g__Unclassified;s__Unclassified	73.49	141	3987852	141	3987852	191876	41786	13783	0	3647	3567201	978	0.91	73.45	89.45	420651	73.87	10.55	47
MAG1025	d__Bacteria;p__Chloroflexota;c__Chloroflexia;o__Thermomicrobiales;f__UBA6265;g__UBA6265;s__Unclassified	59.81	420	3405182	420	3405182	64576	15331	3245	0	3358	3051603	909	0.99	60.07	89.62	353579	57.52	10.38	44
MAG1026	d__Bacteria;p__Dormibacterota;c__Dormibacteria;o__Unclassified;f__Unclassified;g__Unclassified;s__Unclassified	68.79	161	1797405	161	1797405	60609	16597	5293	0	1843	1698927	922	1.03	68.91	94.52	98478	66.82	5.48	30
MAG1027	d__Bacteria;p__Pseudomonadota;c__Gammaproteobacteria;o__Burkholderiales;f__Burkholderiaceae_C;g__SCQX01;s__Unclassified	64.97	568	2846590	568	2846590	28337	6220	2589	0	3066	2570406	838	1.08	65.49	90.3	276184	60.13	9.7	28
MAG1028	d__Bacteria;p__Actinomycetota;c__Actinomycetia;o__Actinomycetales;f__Micrococcaceae;g__Glutamicibacter;s__Glutamicibacter nicotianae	61.86	673	2628325	673	2628325	58285	5912	1651	0	2958	2328213	787	1.13	62.69	88.58	300112	55.41	11.42	47
MAG1029	d__Bacteria;p__Pseudomonadota;c__Alphaproteobacteria;o__Sphingomonadales;f__Sphingomonadaceae;g__Sphingomicrobium;s__Unclassified	66.17	295	1028786	295	1028786	24871	3752	1868	0	1317	964506	732	1.28	66.43	93.75	64280	62.31	6.25	14
MAG103	d__Bacteria;p__Acidobacteriota;c__Blastocatellia;o__Pyrinomonadales;f__Pyrinomonadaceae;g__Unclassified;s__Unclassified	50.07	1452	4738878	1452	4738878	24824	4081	1626	0	4980	4306374	865	1.05	51.25	90.87	432504	38.25	9.13	59
MAG1030	d__Bacteria;p__Chloroflexota;c__Chloroflexia;o__Chloroflexales;f__Herpetosiphonaceae;g__Herpetosiphon;s__Herpetosiphon geysericola	50.7	413	5363069	413	5363069	99813	21478	5932	0	4988	4750830	952	0.93	51.35	88.58	612239	45.61	11.42	42
MAG1031	d__Bacteria;p__Actinomycetota;c__Actinomycetia;o__Actinomycetales;f__Actinomycetaceae;g__KH17;s__Unclassified	66.54	290	1939544	290	1939544	58658	13921	2416	0	1970	1778709	903	1.02	66.72	91.71	160835	64.55	8.29	25
MAG1032	d__Bacteria;p__Actinomycetota;c__Actinomycetia;o__Actinomycetales;f__Dermabacteraceae;g__Brachybacterium;s__Brachybacterium sp012799425	70.68	438	3066222	438	3066222	33723	8866	3564	0	3080	2807439	912	1	70.7	91.56	258783	70.45	8.44	41
MAG1033	d__Bacteria;p__Bacteroidota;c__Bacteroidia;o__Flavobacteriales;f__Weeksellaceae;g__Planobacterium;s__Planobacterium lacus	39.69	901	1574460	901	1574460	6620	1847	1136	0	2141	1432713	669	1.36	40.5	91	141747	31.55	9	29
MAG1034	d__Bacteria;p__Gemmatimonadota;c__Gemmatimonadetes;o__Gemmatimonadales;f__Gemmatimonadaceae;g__UBA4720;s__Unclassified	61.63	1120	2336928	1120	2336928	13600	2220	1239	0	3060	2201067	719	1.31	61.9	94.19	135861	57.24	5.81	34
MAG1035	d__Bacteria;p__Actinomycetota;c__Actinomycetia;o__Actinomycetales;f__Cellulomonadaceae;g__Timonella;s__Unclassified	57.55	808	1445423	808	1445423	7207	1875	1132	0	1927	1304676	677	1.33	58.1	90.26	140747	52.41	9.74	23
MAG1036	d__Bacteria;p__Pseudomonadota;c__Gammaproteobacteria;o__Burkholderiales;f__Casimicrobiaceae;g__VBCG01;s__Unclassified	70.13	612	3369640	612	3369640	26641	6420	3036	0	3669	3161631	862	1.09	70.17	93.83	208009	69.42	6.17	22
MAG1037	d__Bacteria;p__Actinomycetota;c__Actinomycetia;o__Actinomycetales;f__Micrococcaceae;g__Arthrobacter;s__Unclassified	64.93	805	2591169	805	2591169	28320	4108	1580	0	3074	2335824	760	1.19	65.36	90.15	255345	60.99	9.85	38
MAG1038	d__Bacteria;p__Bacillota;c__Bacilli;o__Bacillales;f__Planococcaceae;g__Sporosarcina;s__Sporosarcina quadrami	41.7	137	3187064	137	3187064	108287	50891	9396	0	3256	2819346	866	1.02	42.25	88.46	367718	37.53	11.54	22
MAG1039	d__Bacteria;p__Actinomycetota;c__Thermoleophilia;o__Solirubrobacterales;f__Solirubrobacteraceae;g__Unclassified;s__Unclassified	73.83	749	3687086	749	3687086	64616	6992	2274	0	4394	3507039	798	1.19	73.95	95.12	180047	71.54	4.88	38
MAG104	d__Bacteria;p__Pseudomonadota;c__Gammaproteobacteria;o__Burkholderiales;f__Casimicrobiaceae;g__VBCG01;s__Unclassified	67.71	558	3989934	558	3989934	51548	9432	3406	0	4134	3713388	898	1.04	67.88	93.07	276546	65.36	6.93	34
MAG1040	d__Bacteria;p__Bacillota;c__Bacilli;o__Bacillales;f__Planococcaceae;g__Kurthia;s__Kurthia intestinigallinarum	39.48	792	1897555	792	1897555	18801	2612	1294	0	2458	1666968	678	1.3	40.21	87.85	230587	34.17	12.15	12
MAG1041	d__Bacteria;p__Actinomycetota;c__Actinomycetia;o__Actinomycetales;f__Actinomycetaceae;g__KH17;s__Unclassified	65.6	239	1745050	239	1745050	80241	14600	2751	0	1776	1602987	903	1.02	65.77	91.86	142063	63.77	8.14	25
MAG1042	d__Bacteria;p__Actinomycetota;c__Acidimicrobiia;o__Acidimicrobiales;f__JAFATL01;g__JAFATL01;s__Unclassified	69.85	574	3993292	574	3993292	44549	9084	3324	0	4497	3801948	845	1.13	70.03	95.21	191344	66.25	4.79	43
MAG1043	d__Bacteria;p__Actinomycetota;c__Acidimicrobiia;o__Acidimicrobiales;f__AC-14;g__CADCTB01;s__Unclassified	71.77	1046	2965844	1046	2965844	16200	3333	1462	0	3804	2767095	727	1.28	71.99	93.3	198749	68.73	6.7	23
MAG1044	d__Bacteria;p__Pseudomonadota;c__Gammaproteobacteria;o__Burkholderiales;f__Burkholderiaceae_B;g__JAEUPI01;s__Unclassified	68.31	1652	2539813	1652	2539813	5948	1520	1072	0	3605	2376345	659	1.42	68.4	93.56	163468	67.01	6.44	11
MAG1045	d__Bacteria;p__Actinomycetota;c__Actinomycetia;o__Actinomycetales;f__Dermatophilaceae;g__Pedococcus;s__Unclassified	71.03	1229	2645511	1229	2645511	10787	2364	1190	0	3572	2430081	680	1.35	71.12	91.86	215430	69.92	8.14	37
MAG1046	d__Bacteria;p__Actinomycetota;c__Thermoleophilia;o__Solirubrobacterales;f__70-9;g__VAYN01;s__Unclassified	69.7	43	2736683	43	2736683	555485	213846	49066	0	2695	2542026	943	0.98	70.15	92.89	194657	63.89	7.11	51
MAG1047	d__Bacteria;p__Acidobacteriota;c__Blastocatellia;o__Pyrinomonadales;f__Pyrinomonadaceae;g__SXVE01;s__Unclassified	48.56	467	3088894	467	3088894	34932	9041	3224	0	3070	2726271	888	0.99	50.18	88.26	362623	36.43	11.74	36
MAG1048	d__Bacteria;p__Actinomycetota;c__Actinomycetia;o__Mycobacteriales;f__Mycobacteriaceae;g__Dietzia;s__Dietzia aerolata	68.93	476	2858682	476	2858682	62721	8952	2669	0	2930	2596179	886	1.02	69.15	90.82	262503	66.75	9.18	29
MAG1049	d__Bacteria;p__Actinomycetota;c__Acidimicrobiia;o__Acidimicrobiales;f__JADJXE01;g__Unclassified;s__Unclassified	69.42	1093	2771658	1093	2771658	11919	2906	1387	0	3671	2666244	726	1.32	69.45	96.2	105414	68.82	3.8	24
MAG105	d__Bacteria;p__Cyanobacteriota;c__Cyanobacteriia;o__Cyanobacteriales;f__Microcoleaceae;g__Microcoleus;s__Microcoleus sp014695295	46.42	1974	2860520	1974	2860520	5471	1430	1067	0	3702	2368746	640	1.29	47.33	82.81	491774	42.04	17.19	38
MAG1050	d__Bacteria;p__Pseudomonadota;c__Alphaproteobacteria;o__Sphingomonadales;f__Sphingomonadaceae;g__Allosphingosinicella;s__Unclassified	67.95	505	3744373	505	3744373	34805	10419	3679	0	3876	3348567	864	1.04	68.44	89.43	395806	63.76	10.57	46
MAG1051	d__Bacteria;p__Pseudomonadota;c__Alphaproteobacteria;o__Rhodobacterales;f__Rhodobacteraceae;g__Paracoccus;s__Unclassified	59.53	1073	1875221	1073	1875221	6695	1792	1121	0	2683	1705431	636	1.43	60.04	90.95	169790	54.48	9.05	11
MAG1052	d__Bacteria;p__Bacillota;c__Bacilli;o__Erysipelotrichales;f__Erysipelotrichaceae;g__JAAZDN01;s__Unclassified	32.39	153	1321302	153	1321302	53441	13064	3515	0	1364	1215252	891	1.03	32.81	91.97	106050	27.52	8.03	24
MAG1053	d__Archaea;p__Thermoproteota;c__Nitrososphaeria;o__Nitrososphaerales;f__Nitrososphaeraceae;g__Nitrosocosmicus;s__Nitrosocosmicus oleophilus	33.96	615	2681970	615	2681970	24777	5687	2139	0	3229	1980639	613	1.2	35.47	73.85	701331	29.67	26.15	22
MAG1054	d__Bacteria;p__Acidobacteriota;c__Thermoanaerobaculia;o__Gp7-AA8;f__Gp7-AA8;g__QHVT01;s__Unclassified	65.55	1411	3466520	1411	3466520	9095	2493	1642	0	4079	3299127	809	1.18	65.65	95.17	167393	63.71	4.83	21
MAG1055	d__Bacteria;p__Bacillota;c__Bacilli;o__Staphylococcales;f__Salinicoccaceae;g__Jeotgalicoccus;s__Unclassified	41.34	621	1881808	621	1881808	21299	3696	1498	0	2304	1714341	744	1.22	42.11	91.1	167467	33.39	8.9	15
MAG1056	d__Bacteria;p__Pseudomonadota;c__Alphaproteobacteria;o__Sphingomonadales;f__Sphingomonadaceae;g__Allosphingosinicella;s__Unclassified	68.44	82	3238359	82	3238359	188004	87536	22030	0	3335	2964462	889	1.03	68.91	91.54	273897	63.31	8.46	50
MAG1057	d__Bacteria;p__Actinomycetota;c__Actinomycetia;o__Jiangellales;f__Unclassified;g__Unclassified;s__Unclassified	74.38	1335	2892526	1335	2892526	11904	2401	1178	0	3749	2658795	709	1.3	74.44	91.92	233731	73.69	8.08	24
MAG1058	d__Bacteria;p__Pseudomonadota;c__Gammaproteobacteria;o__Pseudomonadales;f__Pseudomonadaceae;g__Halopseudomonas;s__Unclassified	60.17	434	2200794	434	2200794	21401	5566	3019	0	2346	2010669	857	1.07	60.6	91.36	190125	55.55	8.64	23
MAG1059	d__Bacteria;p__Pseudomonadota;c__Gammaproteobacteria;o__Diplorickettsiales;f__Diplorickettsiaceae;g__Aquirickettsiella;s__Unclassified	37.52	683	1484103	683	1484103	11880	2416	1210	0	1810	1315227	727	1.22	38.1	88.62	168876	32.97	11.38	44
MAG106	d__Bacteria;p__Verrucomicrobiota;c__Verrucomicrobiae;o__Chthoniobacterales;f__UBA10450;g__Udaeobacter;s__Unclassified	54.79	386	3702091	386	3702091	75158	14408	4209	0	3688	3296202	894	1	54.95	89.04	405889	53.45	10.96	49
MAG1060	d__Bacteria;p__Chloroflexota;c__UBA6077;o__UBA6077;f__CF-72;g__Unclassified;s__Unclassified	67.24	837	5812258	837	5812258	44183	9720	3308	0	6053	5350644	884	1.04	67.37	92.06	461614	65.66	7.94	45
MAG1061	d__Bacteria;p__Actinomycetota;c__Actinomycetia;o__Propionibacteriales;f__Propionibacteriaceae;g__Microlunatus;s__Unclassified	68.91	578	2969534	578	2969534	23603	5426	3316	0	3178	2673423	841	1.07	69.15	90.03	296111	66.68	9.97	22
MAG1062	d__Bacteria;p__Acidobacteriota;c__Blastocatellia;o__Pyrinomonadales;f__Pyrinomonadaceae;g__QHXN01;s__Unclassified	60.17	1520	3034377	1520	3034377	8974	2118	1205	0	3621	2657280	734	1.19	61.35	87.57	377097	51.92	12.43	29
MAG1063	d__Bacteria;p__Bacteroidota;c__Bacteroidia;o__Sphingobacteriales;f__Sphingobacteriaceae;g__Sphingobacterium;s__Unclassified	40.4	1252	2823827	1252	2823827	10140	2418	1325	0	3213	2613948	814	1.14	41.13	92.57	209879	31.28	7.43	9
MAG1064	d__Bacteria;p__Acidobacteriota;c__Thermoanaerobaculia;o__Gp7-AA8;f__Gp7-AA8;g__QHVT01;s__Unclassified	65.36	67	6131549	67	6131549	372690	131437	46770	0	5136	5816751	1133	0.84	65.43	94.87	314798	63.99	5.13	47
MAG1065	d__Bacteria;p__Chloroflexota;c__Limnocylindria;o__QHBO01;f__QHBO01;g__JACDBZ01;s__Unclassified	70.99	396	1940136	396	1940136	25383	5934	2516	0	2237	1804845	807	1.15	71.11	93.03	135291	69.43	6.97	40
MAG1066	d__Bacteria;p__Pseudomonadota;c__Alphaproteobacteria;o__Reyranellales;f__Unclassified;g__Unclassified;s__Unclassified	64.82	1022	2157252	1022	2157252	9700	2361	1196	0	2883	2006682	696	1.34	65.16	93.02	150570	60.33	6.98	16
MAG1067	d__Bacteria;p__Pseudomonadota;c__Gammaproteobacteria;o__Xanthomonadales;f__Xanthomonadaceae;g__Pseudoxanthomonas_A;s__Unclassified	67.32	603	2702705	603	2702705	20786	4935	2661	0	2971	2460330	828	1.1	67.5	91.03	242375	65.41	8.97	36
MAG1068	d__Archaea;p__Thermoproteota;c__Nitrososphaeria;o__Nitrososphaerales;f__Nitrososphaeraceae;g__TA-21;s__Unclassified	35.32	331	958008	331	958008	11381	3072	1752	0	1324	812124	613	1.38	36.26	84.77	145884	30.13	15.23	10
MAG1069	d__Bacteria;p__Pseudomonadota;c__Gammaproteobacteria;o__Xanthomonadales;f__Xanthomonadaceae;g__Lysobacter_B;s__Lysobacter_B sp011300685	57.02	558	1672448	558	1672448	15266	3738	1541	0	2086	1585113	760	1.25	57.19	94.78	87335	53.94	5.22	33
MAG107	d__Bacteria;p__Actinomycetota;c__Actinomycetia;o__Actinomycetales;f__Micrococcaceae;g__Sinomonas;s__Unclassified	68.85	132	3729784	132	3729784	143270	45902	13484	0	3566	3355704	941	0.96	69.18	89.97	374080	65.87	10.03	53
MAG1070	d__Bacteria;p__Actinomycetota;c__Thermoleophilia;o__Solirubrobacterales;f__70-9;g__VAYN01;s__Unclassified	68.49	680	1352625	680	1352625	7141	2081	1241	0	1901	1239900	652	1.41	68.98	91.67	112725	63.06	8.33	33
MAG1071	d__Bacteria;p__Actinomycetota;c__UBA4738;o__UBA4738;f__HRBIN12;g__Unclassified;s__Unclassified	69.8	457	2266535	457	2266535	20163	6245	2505	0	2653	2129394	803	1.17	69.78	93.95	137141	69.98	6.05	26
MAG1072	d__Bacteria;p__Pseudomonadota;c__Alphaproteobacteria;o__Rhizobiales;f__Rhizobiaceae;g__Aquamicrobium_A;s__Unclassified	60.79	757	2375977	757	2375977	12287	3436	1889	0	2848	2166129	761	1.2	61.22	91.17	209848	56.3	8.83	15
MAG1073	d__Bacteria;p__Actinomycetota;c__Actinomycetia;o__Propionibacteriales;f__Propionibacteriaceae;g__Aestuariimicrobium;s__Aestuariimicrobium sp017355265	69.02	960	2060736	960	2060736	12437	2298	1225	0	2657	1915647	721	1.29	69.14	92.96	145089	67.51	7.04	19
MAG1074	d__Bacteria;p__Acidobacteriota;c__Blastocatellia;o__Pyrinomonadales;f__Pyrinomonadaceae;g__Unclassified;s__Unclassified	50.14	333	4852746	333	4852746	63489	21745	7402	0	4319	4407870	1021	0.89	51.36	90.83	444876	38.01	9.17	56
MAG1075	d__Bacteria;p__Chloroflexota;c__Limnocylindria;o__Limnocylindrales;f__CSP1-4;g__SPCO01;s__Unclassified	72.29	647	2468582	647	2468582	14426	4386	2025	0	2894	2302935	796	1.17	72.19	93.29	165647	73.61	6.71	30
MAG1076	d__Bacteria;p__Actinomycetota;c__Actinomycetia;o__Actinomycetales;f__Microbacteriaceae;g__Microbacterium;s__Unclassified	71.27	553	2031196	553	2031196	22378	4103	2033	0	2361	1896549	803	1.16	71.41	93.37	134647	69.29	6.63	34
MAG1077	d__Bacteria;p__Bacteroidota;c__Bacteroidia;o__Chitinophagales;f__Chitinophagaceae;g__Flavisolibacter;s__Unclassified	41.13	1691	3466777	1691	3466777	8472	2218	1188	0	4161	3067272	737	1.2	41.76	88.48	399505	36.28	11.52	26
MAG1078	d__Bacteria;p__Actinomycetota;c__Actinomycetia;o__Actinomycetales;f__Microbacteriaceae;g__Yonghaparkia;s__Unclassified	72.1	380	1849206	380	1849206	21453	6263	2331	0	2084	1718706	825	1.13	72.17	92.94	130500	71.07	7.06	29
MAG1079	d__Bacteria;p__Acidobacteriota;c__Blastocatellia;o__Pyrinomonadales;f__Pyrinomonadaceae;g__UBA11740;s__Unclassified	54.69	527	2505844	527	2505844	19986	5249	2865	0	2611	2311617	885	1.04	55.07	92.25	194227	50.11	7.75	20
MAG108	d__Bacteria;p__Bacillota;c__Bacilli;o__Bacillales_K;f__Sporolactobacillaceae;g__Unclassified;s__Unclassified	42.11	763	2156838	763	2156838	26119	3525	1357	0	2682	1866681	696	1.24	42.68	86.55	290157	38.42	13.45	24
MAG1080	d__Bacteria;p__Actinomycetota;c__Actinomycetia;o__Mycobacteriales;f__Jatrophihabitantaceae;g__QHCC01;s__Unclassified	69.57	411	3018588	411	3018588	86252	14693	3017	0	3261	2842953	872	1.08	69.69	94.18	175635	67.74	5.82	38
MAG1081	d__Bacteria;p__Desulfobacterota_B;c__Binatia;o__UBA9968;f__UBA9968;g__DP-20;s__Unclassified	55.05	1386	4338890	1386	4338890	19901	3330	1868	0	5058	3872391	766	1.17	55.56	89.25	466499	50.77	10.75	26
MAG1082	d__Bacteria;p__Acidobacteriota;c__Thermoanaerobaculia;o__UBA5704;f__UBA5704;g__UBA5704;s__Unclassified	68.52	1593	5989616	1593	5989616	23959	4293	2016	0	6073	5531814	911	1.01	69.01	92.36	457802	62.66	7.64	39
MAG1083	d__Bacteria;p__Actinomycetota;c__Actinomycetia;o__Actinomycetales;f__Dermatophilaceae;g__Pedococcus;s__Unclassified	70.35	814	3561302	814	3561302	49991	7088	1772	0	4121	3246546	788	1.16	70.54	91.16	314756	68.43	8.84	60
MAG1084	d__Bacteria;p__Cyanobacteriota;c__Cyanobacteriia;o__Cyanobacteriales;f__Coleofasciculaceae;g__Unclassified;s__Unclassified	48.4	1468	3582052	1468	3582052	8058	2459	1699	0	4038	3029226	750	1.13	49.28	84.57	552826	43.57	15.43	27
MAG1085	d__Bacteria;p__Bacillota;c__Bacilli;o__Lactobacillales;f__Lactobacillaceae;g__Limosilactobacillus;s__Limosilactobacillus ingluviei	51.74	391	1606207	391	1606207	26374	5513	1937	0	1800	1432752	796	1.12	52.86	89.2	173455	42.54	10.8	22
MAG1086	d__Bacteria;p__Acidobacteriota;c__Blastocatellia;o__Pyrinomonadales;f__Pyrinomonadaceae;g__OLB17;s__Unclassified	54.7	136	3213879	136	3213879	251101	42727	11111	0	2974	3011769	1013	0.93	55.18	93.71	202110	47.66	6.29	51
MAG1087	d__Bacteria;p__Pseudomonadota;c__Alphaproteobacteria;o__Rhizobiales;f__Xanthobacteraceae;g__Bradyrhizobium;s__Unclassified	64.03	781	4115866	781	4115866	31459	6712	2582	0	4389	3592026	818	1.07	64.57	87.27	523840	60.31	12.73	41
MAG1088	d__Bacteria;p__Dormibacterota;c__Dormibacteria;o__Dormibacterales;f__Dormibacteraceae;g__Unclassified;s__Unclassified	71.58	499	2252263	499	2252263	20885	5814	2265	0	2626	2126325	810	1.17	71.67	94.41	125938	69.96	5.59	26
MAG1089	d__Bacteria;p__Actinomycetota;c__Thermoleophilia;o__Gaiellales;f__Gaiellaceae;g__JACCRW01;s__Unclassified	72.04	587	2031713	587	2031713	16690	4750	1645	0	2561	1937208	756	1.26	72.21	95.35	94505	68.45	4.65	21
MAG109	d__Bacteria;p__Gemmatimonadota;c__Gemmatimonadetes;o__Gemmatimonadales;f__Gemmatimonadaceae;g__JABFXC01;s__Unclassified	70.63	1045	2266711	1045	2266711	6226	2127	1610	0	2750	2089116	760	1.21	70.83	92.17	177595	68.17	7.83	18
MAG1090	d__Bacteria;p__Patescibacteria;c__Saccharimonadia;o__Saccharimonadales;f__Unclassified;g__Unclassified;s__Unclassified	49.33	66	586116	66	586116	32019	9930	4428	0	673	536766	798	1.15	49.97	91.58	49350	42.32	8.42	31
MAG1091	d__Bacteria;p__Armatimonadota;c__Fimbriimonadia;o__Fimbriimonadales;f__Fimbriimonadaceae;g__Unclassified;s__Unclassified	57.35	1107	4487691	1107	4487691	31404	6528	1588	0	5183	4009353	774	1.15	57.62	89.34	478338	55.05	10.66	57
MAG1092	d__Bacteria;p__Pseudomonadota;c__Alphaproteobacteria;o__Sphingomonadales;f__Sphingomonadaceae;g__Allosphingosinicella;s__Unclassified	68.65	125	3410897	125	3410897	156205	50913	12560	0	3389	3101871	915	0.99	69.06	90.94	309026	64.54	9.06	50
MAG1093	d__Bacteria;p__Pseudomonadota;c__Alphaproteobacteria;o__Sphingomonadales;f__Sphingomonadaceae;g__Sphingomicrobium;s__Unclassified	63.78	344	2405199	344	2405199	45289	12315	2788	0	2705	2234811	826	1.12	64.03	92.92	170388	60.55	7.08	38
MAG1094	d__Bacteria;p__Bacteroidota;c__Bacteroidia;o__Sphingobacteriales;f__Sphingobacteriaceae;g__Sphingobacterium;s__Unclassified	41.3	228	3114355	228	3114355	110387	20475	5702	0	2872	2838213	988	0.92	42.13	91.13	276142	32.76	8.87	40
MAG1095	d__Bacteria;p__Cyanobacteriota;c__Cyanobacteriia;o__Cyanobacteriales;f__Microcoleaceae;g__Microcoleus;s__Unclassified	46.87	2368	3512385	2368	3512385	4610	1461	1077	0	4374	2888892	660	1.25	47.86	82.25	623493	42.29	17.75	21
MAG1096	d__Bacteria;p__Gemmatimonadota;c__Gemmatimonadetes;o__Gemmatimonadales;f__Gemmatimonadaceae;g__JADGGM01;s__Unclassified	66.61	1656	2552142	1656	2552142	5620	1530	1087	0	3488	2342955	672	1.37	66.82	91.8	209187	64.24	8.2	11
MAG1097	d__Bacteria;p__Actinomycetota;c__Actinomycetia;o__Actinomycetales;f__Micrococcaceae;g__Arthrobacter_H;s__Arthrobacter_H sp016892645	68.62	597	2147496	597	2147496	16299	3959	2024	0	2487	1968528	792	1.16	68.82	91.67	178968	66.36	8.33	31
MAG1098	d__Bacteria;p__Pseudomonadota;c__Gammaproteobacteria;o__Pseudomonadales;f__Moraxellaceae;g__Acinetobacter;s__Acinetobacter brisouii	42.48	932	1650626	932	1650626	7310	1822	1151	0	2262	1452033	642	1.37	43.65	87.97	198593	33.89	12.03	32
MAG1099	d__Bacteria;p__Actinomycetota;c__Actinomycetia;o__Propionibacteriales;f__Propionibacteriaceae;g__Arachnia;s__Unclassified	69.65	413	2530261	413	2530261	41704	8857	2833	0	2612	2338731	895	1.03	69.94	92.43	191530	66.18	7.57	34
MAG11	d__Bacteria;p__Planctomycetota;c__Planctomycetia;o__Planctomycetales;f__Planctomycetaceae;g__JACCRE01;s__Unclassified	58.33	1387	2297544	1387	2297544	6863	1677	1112	0	2868	1965204	685	1.25	58.81	85.53	332340	55.48	14.47	21
MAG110	d__Bacteria;p__Acidobacteriota;c__Vicinamibacteria;o__Vicinamibacterales;f__SCN-69-37;g__Unclassified;s__Unclassified	66.06	968	5741391	968	5741391	50369	7735	2789	0	5363	5299587	988	0.93	66.5	92.3	441804	60.8	7.7	29
MAG1100	d__Bacteria;p__Pseudomonadota;c__Gammaproteobacteria;o__Xanthomonadales;f__Rhodanobacteraceae;g__Dyella;s__Unclassified	67.22	1773	3210660	1773	3210660	5883	1878	1185	0	4168	2960769	710	1.3	67.47	92.22	249891	64.32	7.78	23
MAG1101	d__Bacteria;p__Actinomycetota;c__Thermoleophilia;o__Gaiellales;f__Gaiellaceae;g__JACCRW01;s__Unclassified	71.87	389	2099766	389	2099766	35591	6899	2727	0	2529	1994565	789	1.2	72.04	94.99	105201	68.53	5.01	25
MAG1102	d__Bacteria;p__Actinomycetota;c__Actinomycetia;o__Actinomycetales;f__Dermatophilaceae;g__F2B08;s__Unclassified	70.72	415	3375595	415	3375595	69611	12142	3499	0	3385	3115362	920	1	70.86	92.29	260233	69.1	7.71	40
MAG1103	d__Bacteria;p__Actinomycetota;c__Rubrobacteria;o__Rubrobacterales;f__Rubrobacteraceae;g__Rubrobacter_D;s__Unclassified	65.83	801	2430030	801	2430030	16202	3203	1828	0	3010	2180463	724	1.24	66.39	89.73	249567	60.96	10.27	27
MAG1104	d__Bacteria;p__Pseudomonadota;c__Alphaproteobacteria;o__Rhodobacterales;f__Rhodobacteraceae;g__Paracoccus;s__Paracoccus sp002359815	62.73	575	3055456	575	3055456	32978	6309	2688	0	3443	2715999	789	1.13	63.25	88.89	339457	58.63	11.11	41
MAG1105	d__Bacteria;p__Actinomycetota;c__Actinomycetia;o__Propionibacteriales;f__Propionibacteriaceae;g__Arachnia;s__Unclassified	68.93	560	3971090	560	3971090	64718	10819	2968	0	4056	3641805	898	1.02	69.26	91.71	329285	65.25	8.29	50
MAG1106	d__Bacteria;p__Bacteroidota;c__Bacteroidia;o__Flavobacteriales;f__Weeksellaceae;g__Kaistella;s__Unclassified	46.3	374	2247495	374	2247495	72411	11094	2343	0	2330	2027439	870	1.04	47.37	90.21	220056	36.47	9.79	26
MAG1107	d__Bacteria;p__Patescibacteria;c__Saccharimonadia;o__Saccharimonadales;f__UBA10212;g__JAIFWC01;s__Unclassified	40.55	89	397235	89	397235	15713	4947	2673	0	490	362574	740	1.23	41.14	91.27	34661	34.44	8.73	16
MAG1108	d__Archaea;p__Thermoproteota;c__Nitrososphaeria;o__Nitrososphaerales;f__Nitrososphaeraceae;g__Nitrosocosmicus;s__Nitrosocosmicus oleophilus	33.95	374	2787631	374	2787631	52644	11708	3239	0	3233	2058423	637	1.16	35.48	73.84	729208	29.64	26.16	35
MAG1109	d__Bacteria;p__Pseudomonadota;c__Alphaproteobacteria;o__Sphingomonadales;f__Sphingomonadaceae;g__Sphingomonas_I;s__Unclassified	63.96	1515	4942354	1515	4942354	18554	3526	1858	0	5743	4387896	764	1.16	64.37	88.78	554458	60.69	11.22	48
MAG111	d__Bacteria;p__Deinococcota;c__Deinococci;o__Deinococcales;f__Trueperaceae;g__Unclassified;s__Unclassified	63.6	248	2181260	248	2181260	68027	14228	3660	0	2229	2044719	917	1.02	63.92	93.74	136541	58.91	6.26	41
MAG1110	d__Bacteria;p__Bacillota;c__Bacilli;o__Lactobacillales;f__Vagococcaceae;g__Vagococcus;s__Unclassified	33.11	178	1792768	178	1792768	93748	16795	4335	0	1755	1632702	930	0.98	33.63	91.07	160066	27.74	8.93	12
MAG1111	d__Bacteria;p__Pseudomonadota;c__Alphaproteobacteria;o__Sphingomonadales;f__Sphingomonadaceae;g__Sphingomonas_O;s__Unclassified	66.04	445	1839952	445	1839952	27578	4919	2265	0	2216	1736178	783	1.2	66.27	94.36	103774	62.23	5.64	29
MAG1112	d__Bacteria;p__Chloroflexota;c__Limnocylindria;o__Limnocylindrales;f__CSP1-4;g__SPCO01;s__Unclassified	72.4	380	2906891	380	2906891	41025	11450	3564	0	3109	2710167	872	1.07	72.31	93.23	196724	73.54	6.77	40
MAG1113	d__Bacteria;p__Chloroflexota;c__Anaerolineae;o__Anaerolineales;f__EnvOPS12;g__UBA12294;s__Unclassified	54.6	1046	2597852	1046	2597852	15647	2902	1316	0	3252	2408373	741	1.25	55.29	92.71	189479	45.83	7.29	20
MAG1114	d__Bacteria;p__Pseudomonadota;c__Alphaproteobacteria;o__Rhizobiales;f__Xanthobacteraceae;g__Bradyrhizobium;s__Unclassified	63.8	934	3851828	934	3851828	36495	5652	1817	0	4233	3375672	797	1.1	64.31	87.64	476156	60.18	12.36	39
MAG1115	d__Bacteria;p__Actinomycetota;c__Actinomycetia;o__Actinomycetales;f__Micrococcaceae;g__Glutamicibacter;s__Glutamicibacter sp004320535	55.15	525	3112672	525	3112672	76808	12292	2130	0	3302	2749413	833	1.06	55.78	88.33	363259	50.41	11.67	53
MAG1116	d__Bacteria;p__Actinomycetota;c__Actinomycetia;o__Mycobacteriales;f__Mycobacteriaceae;g__Corynebacterium;s__Corynebacterium marinum	68.57	299	2143872	299	2143872	50782	10185	3333	0	2236	1972146	882	1.04	69.07	91.99	171726	62.77	8.01	43
MAG1117	d__Bacteria;p__Verrucomicrobiota;c__Verrucomicrobiae;o__Chthoniobacterales;f__UBA10450;g__AV80;s__Unclassified	60.44	680	3231701	680	3231701	22108	5539	2671	0	3351	2989587	892	1.04	60.64	92.51	242114	57.91	7.49	40
MAG1118	d__Bacteria;p__Chloroflexota;c__Chloroflexia;o__Thermomicrobiales;f__UBA6265;g__JAMLHN01;s__Unclassified	61.72	983	2288066	983	2288066	8976	2325	1618	0	2862	2047482	715	1.25	61.95	89.49	240584	59.76	10.51	26
MAG1119	d__Bacteria;p__Chloroflexota;c__Anaerolineae;o__Anaerolineales;f__EnvOPS12;g__UBA12294;s__Unclassified	50.12	1442	4388086	1442	4388086	12662	3241	1828	0	5183	3969654	766	1.18	50.85	90.46	418432	43.28	9.54	27
MAG112	d__Bacteria;p__Deinococcota;c__Deinococci;o__Deinococcales;f__Deinococcaceae;g__Deinococcus;s__Unclassified	67.43	1020	1713157	1020	1713157	6042	1694	1119	0	2378	1514889	637	1.39	68.07	88.43	198268	62.51	11.57	22
MAG1120	d__Bacteria;p__Actinomycetota;c__Actinomycetia;o__Actinomycetales;f__Dermatophilaceae;g__Mobilicoccus;s__Unclassified	70.2	968	2471299	968	2471299	31313	2956	1273	0	2953	2237178	758	1.19	70.35	90.53	234121	68.79	9.47	18
MAG1121	d__Bacteria;p__Bacillota;c__Bacilli;o__Erysipelotrichales;f__Erysipelotrichaceae;g__Erysipelothrix;s__Erysipelothrix sp012520695	39.02	209	760840	209	760840	12853	4261	2007	0	927	706230	762	1.22	39.41	92.82	54610	34	7.18	9
MAG1122	d__Bacteria;p__Bacteroidota;c__Bacteroidia;o__Flavobacteriales;f__PHOS-HE28;g__PHOS-HE28;s__Unclassified	55.44	1138	2027530	1138	2027530	6474	1838	1131	0	2684	1897170	707	1.32	55.64	93.57	130360	52.56	6.43	22
MAG1123	d__Bacteria;p__Actinomycetota;c__Thermoleophilia;o__Gaiellales;f__Gaiellaceae;g__VAXT01;s__Unclassified	68.34	451	1509257	451	1509257	13837	3706	1924	0	1902	1423059	748	1.26	68.49	94.29	86198	65.76	5.71	15
MAG1124	d__Bacteria;p__Pseudomonadota;c__Gammaproteobacteria;o__Burkholderiales;f__Burkholderiaceae_C;g__Paenalcaligenes;s__Unclassified	47.01	199	1372309	199	1372309	32261	8552	3457	0	1446	1304784	902	1.05	47.52	95.08	67525	37.24	4.92	19
MAG1125	d__Bacteria;p__Actinomycetota;c__Thermoleophilia;o__Solirubrobacterales;f__70-9;g__Unclassified;s__Unclassified	69.62	526	2591572	526	2591572	24032	6440	2355	0	2990	2373723	794	1.15	70.07	91.59	217849	64.77	8.41	48
MAG1126	d__Bacteria;p__Chloroflexota;c__Limnocylindria;o__Limnocylindrales;f__CSP1-4;g__SPCO01;s__Unclassified	72.29	668	2315407	668	2315407	21278	3967	1889	0	2727	2168310	795	1.18	72.18	93.65	147097	73.87	6.35	17
MAG1127	d__Bacteria;p__Pseudomonadota;c__Gammaproteobacteria;o__Burkholderiales;f__Burkholderiaceae;g__Telluria;s__Unclassified	61.52	2180	2814201	2180	2814201	3553	1249	1034	0	4191	2501226	597	1.49	62.41	88.88	312975	54.41	11.12	25
MAG1128	d__Bacteria;p__Actinomycetota;c__Actinomycetia;o__Mycobacteriales;f__CADCTP01;g__CADCTP01;s__Unclassified	72.99	1462	4097787	1462	4097787	13509	3193	1599	0	5036	3709695	737	1.23	73.14	90.53	388092	71.63	9.47	31
MAG1129	d__Bacteria;p__Pseudomonadota;c__Alphaproteobacteria;o__Rhodobacterales;f__Rhodobacteraceae;g__Paracoccus;s__Paracoccus sp021491915	65.91	730	1995426	730	1995426	12592	3041	1618	0	2539	1856388	731	1.27	66.2	93.03	139038	62.07	6.97	21
MAG113	d__Bacteria;p__Chloroflexota;c__UBA5177;o__UBA5177;f__UBA5177;g__Unclassified;s__Unclassified	66.35	699	1790977	699	1790977	10294	2590	1697	0	2243	1597167	712	1.25	66.66	89.18	193810	63.85	10.82	26
MAG1130	d__Bacteria;p__Bacteroidota;c__Bacteroidia;o__Flavobacteriales;f__Flavobacteriaceae;g__Flavobacterium;s__Unclassified	37.63	460	1331542	460	1331542	14655	3342	1592	0	1568	1228233	783	1.18	38.42	92.24	103309	28.24	7.76	23
MAG1131	d__Bacteria;p__Actinomycetota;c__Acidimicrobiia;o__Acidimicrobiales;f__AC-14;g__CADCTB01;s__Unclassified	72.44	596	3158507	596	3158507	31074	6782	2541	0	3696	2931540	793	1.17	72.64	92.81	226967	69.92	7.19	23
MAG1132	d__Bacteria;p__Actinomycetota;c__Thermoleophilia;o__Solirubrobacterales;f__70-9;g__RHKX01;s__Unclassified	70.99	647	2060584	647	2060584	16535	3534	1825	0	2525	1936473	767	1.23	71.08	93.98	124111	69.56	6.02	23
MAG1133	d__Bacteria;p__Actinomycetota;c__Actinomycetia;o__Actinomycetales;f__Microbacteriaceae;g__Microbacterium;s__Unclassified	69.73	542	1825881	542	1825881	19657	3861	1870	0	2144	1703880	795	1.17	69.89	93.32	122001	67.52	6.68	25
MAG1134	d__Bacteria;p__Pseudomonadota;c__Gammaproteobacteria;o__Enterobacterales_A;f__Aeromonadaceae;g__Oceanisphaera;s__Oceanisphaera merdipullorum	50.04	185	3047353	185	3047353	137999	58853	12012	0	2849	2651457	931	0.93	51	87.01	395896	43.66	12.99	57
MAG1135	d__Bacteria;p__Acidobacteriota;c__Thermoanaerobaculia;o__UBA5704;f__UBA5704;g__UBA5704;s__Unclassified	68.74	159	9307146	159	9307146	686395	156846	43307	0	6970	8587452	1232	0.75	69.2	92.27	719694	63.26	7.73	44
MAG1136	d__Bacteria;p__Actinomycetota;c__Actinomycetia;o__Actinomycetales;f__Dermabacteraceae;g__Brachybacterium;s__Brachybacterium rhamnosum	73.52	661	2931090	661	2931090	38629	5680	2162	0	3188	2702922	848	1.09	73.45	92.22	228168	74.29	7.78	41
MAG114	d__Bacteria;p__Dormibacterota;c__Dormibacteria;o__Dormibacterales;f__Dormibacteraceae;g__Unclassified;s__Unclassified	67.85	177	2626190	177	2626190	84625	23042	6710	0	2769	2441235	882	1.05	68.08	92.96	184955	64.88	7.04	34
MAG115	d__Bacteria;p__Bacteroidota;c__Kapabacteria;o__OLB7;f__OLB7;g__JAFDZV01;s__Unclassified	57.76	1669	4956309	1669	4956309	18145	3527	1572	0	5096	4212519	827	1.03	59.07	84.99	743790	50.34	15.01	31
MAG116	d__Bacteria;p__Actinomycetota;c__Actinomycetia;o__Mycobacteriales;f__Mycobacteriaceae;g__Aldersonia;s__Unclassified	66.06	341	5016473	341	5016473	114788	26742	6580	0	4864	4576779	941	0.97	66.37	91.23	439694	62.83	8.77	44
MAG117	d__Bacteria;p__Pseudomonadota;c__Alphaproteobacteria;o__Sphingomonadales;f__Sphingomonadaceae;g__Sphingomonas;s__Unclassified	70.51	637	1903745	637	1903745	17574	3219	1777	0	2403	1729941	720	1.26	70.81	90.87	173804	67.45	9.13	27
MAG118	d__Bacteria;p__Pseudomonadota;c__Gammaproteobacteria;o__Xanthomonadales;f__Xanthomonadaceae;g__Luteimonas_D;s__Unclassified	67.02	760	2432801	760	2432801	16837	3989	1553	0	2796	2253471	806	1.15	67.22	92.63	179330	64.58	7.37	36
MAG119	d__Bacteria;p__Pseudomonadota;c__Gammaproteobacteria;o__Burkholderiales;f__Usitatibacteraceae;g__Usitatibacter;s__Unclassified	67.92	314	4468174	314	4468174	106685	24485	5973	0	4493	4216107	938	1.01	68.3	94.36	252067	61.63	5.64	35
MAG12	d__Bacteria;p__Acidobacteriota;c__Blastocatellia;o__Pyrinomonadales;f__Pyrinomonadaceae;g__QHXN01;s__Unclassified	68.14	1869	4066436	1869	4066436	9634	2373	1308	0	4561	3707421	813	1.12	69.01	91.17	359015	59.23	8.83	33
MAG120	d__Bacteria;p__Pseudomonadota;c__Alphaproteobacteria;o__Rhizobiales;f__Hyphomicrobiaceae;g__AWTP1-13;s__Unclassified	64.83	816	3707059	816	3707059	30644	5443	2428	0	4088	3144729	769	1.1	65.14	84.83	562330	63.08	15.17	21
MAG121	d__Bacteria;p__Actinomycetota;c__Actinomycetia;o__Propionibacteriales;f__Propionibacteriaceae;g__Arachnia;s__Arachnia defluvii	70.52	536	2805546	536	2805546	33805	6756	2641	0	2958	2634837	891	1.05	70.66	93.92	170709	68.35	6.08	34
MAG122	d__Bacteria;p__Pseudomonadota;c__Gammaproteobacteria;o__Xanthomonadales;f__Xanthomonadaceae;g__Lysobacter_B;s__Lysobacter_B sp011300685	56.76	541	1272655	541	1272655	15549	2659	1238	0	1727	1189977	689	1.36	56.94	93.5	82678	54.14	6.5	29
MAG123	d__Bacteria;p__Patescibacteria;c__Saccharimonadia;o__Saccharimonadales;f__UBA5946;g__UBA5946;s__Unclassified	50.24	72	499209	72	499209	17506	8688	3805	0	589	458187	778	1.18	50.83	91.78	41022	43.64	8.22	18
MAG124	d__Bacteria;p__Pseudomonadota;c__Gammaproteobacteria;o__Steroidobacterales;f__Steroidobacteraceae;g__SCUD01;s__Unclassified	69.33	401	2083078	401	2083078	33544	6059	2934	0	2288	1995144	872	1.1	69.49	95.78	87934	65.82	4.22	24
MAG125	d__Bacteria;p__Actinomycetota;c__Actinomycetia;o__Mycobacteriales;f__Nakamurellaceae;g__Nakamurella;s__Unclassified	68.76	932	4767051	932	4767051	26994	5877	2776	0	5075	4246071	837	1.06	68.96	89.07	520980	67.16	10.93	37
MAG126	d__Bacteria;p__Nitrospirota;c__Nitrospiria;o__Nitrospirales;f__Nitrospiraceae;g__Nitrospira_F;s__Unclassified	55.33	575	1710720	575	1710720	13483	3229	1818	0	2146	1523880	710	1.25	55.74	89.08	186840	52.03	10.92	10
MAG127	d__Bacteria;p__Actinomycetota;c__Actinomycetia;o__Mycobacteriales;f__Mycobacteriaceae;g__Corynebacterium;s__Corynebacterium stationis	54.87	540	1912240	540	1912240	19946	4508	1764	0	2171	1732560	798	1.14	55.57	90.6	179680	48.09	9.4	36
MAG128	d__Bacteria;p__Acidobacteriota;c__Thermoanaerobaculia;o__Gp7-AA8;f__Gp7-AA8;g__QHVT01;s__Unclassified	65.38	1294	5103655	1294	5103655	24362	4622	2092	0	5481	4841205	883	1.07	65.47	94.86	262450	63.83	5.14	39
MAG129	d__Bacteria;p__Pseudomonadota;c__Gammaproteobacteria;o__Pseudomonadales;f__Spongiibacteraceae;g__Unclassified;s__Unclassified	54.54	434	1808651	434	1808651	12899	4592	2544	0	2007	1642248	818	1.11	55.21	90.8	166403	47.94	9.2	21
MAG13	d__Bacteria;p__Pseudomonadota;c__Gammaproteobacteria;o__Burkholderiales;f__Burkholderiaceae_B;g__Rhodoferax_A;s__Rhodoferax_A sp004323695	64.54	360	3235913	360	3235913	42639	12517	4174	0	3369	2954586	877	1.04	65.09	91.31	281327	58.79	8.69	43
MAG130	d__Bacteria;p__Pseudomonadota;c__Gammaproteobacteria;o__Burkholderiales;f__SG8-41;g__Unclassified;s__Unclassified	63.69	1374	2182561	1374	2182561	6420	1584	1086	0	3316	2062719	622	1.52	63.89	94.51	119842	60.21	5.49	12
MAG131	d__Bacteria;p__Bacillota;c__Bacilli;o__Bacillales;f__Planococcaceae;g__Planococcus;s__Planococcus sp009707665	49.35	316	2221666	316	2221666	45162	9279	3510	0	2422	1970640	814	1.09	50.25	88.7	251026	42.29	11.3	20
MAG132	d__Bacteria;p__Pseudomonadota;c__Alphaproteobacteria;o__Sphingomonadales;f__Sphingomonadaceae;g__Sphingomicrobium;s__Unclassified	63.11	411	1746788	411	1746788	25557	5108	2124	0	2143	1629348	760	1.23	63.3	93.28	117440	60.51	6.72	33
MAG133	d__Bacteria;p__Pseudomonadota;c__Gammaproteobacteria;o__Burkholderiales;f__Burkholderiaceae_B;g__Ramlibacter;s__Unclassified	69.18	1058	2319907	1058	2319907	8581	2356	1352	0	3143	2134566	679	1.35	69.34	92.01	185341	67.42	7.99	14
MAG134	d__Bacteria;p__Bacteroidota;c__Bacteroidia;o__Sphingobacteriales;f__Sphingobacteriaceae;g__Pedobacter;s__Unclassified	35.96	432	2390194	432	2390194	27867	6895	2814	0	2546	2179890	856	1.07	36.5	91.2	210304	30.4	8.8	20
MAG135	d__Bacteria;p__Actinomycetota;c__Acidimicrobiia;o__UBA5794;f__ZC4RG35;g__Unclassified;s__Unclassified	63.58	1285	2360142	1285	2360142	7114	1928	1176	0	3281	2178141	664	1.39	63.71	92.29	182001	62.03	7.71	29
MAG136	d__Bacteria;p__Actinomycetota;c__Actinomycetia;o__Actinomycetales;f__Beutenbergiaceae;g__Salana;s__Unclassified	71.84	268	2322297	268	2322297	37451	11879	4150	0	2219	2144793	967	0.96	71.9	92.36	177504	71.05	7.64	37
MAG137	d__Bacteria;p__Desulfobacterota_B;c__Binatia;o__UBA9968;f__UBA9968;g__WHTF01;s__Unclassified	53.88	770	2230341	770	2230341	12876	3041	1829	0	2628	1952784	743	1.18	54.42	87.56	277557	50.13	12.44	7
MAG138	d__Bacteria;p__Bacteroidota;c__Bacteroidia;o__Chitinophagales;f__Chitinophagaceae;g__UBA1952;s__Unclassified	50.81	428	3321281	428	3321281	48123	10081	3918	0	3274	3022338	923	0.99	51.42	91	298943	44.63	9	36
MAG139	d__Bacteria;p__Pseudomonadota;c__Gammaproteobacteria;o__Burkholderiales;f__Burkholderiaceae_C;g__Alcaligenes;s__Alcaligenes faecalis	57.02	788	3025704	788	3025704	16797	4481	2121	0	3407	2718942	798	1.13	57.84	89.86	306762	49.72	10.14	33
MAG14	d__Bacteria;p__Myxococcota;c__Polyangia;o__Nannocystales;f__Nannocystaceae;g__Nannocystis;s__Unclassified	72.35	1729	4664917	1729	4664917	16070	2775	1702	0	5115	4247526	830	1.1	72.32	91.05	417391	72.67	8.95	26
MAG140	d__Bacteria;p__Actinomycetota;c__Actinomycetia;o__Actinomycetales;f__Microbacteriaceae;g__Microbacterium;s__Unclassified	67.79	227	2486702	227	2486702	93379	21216	5034	0	2519	2318250	920	1.01	68	93.23	168452	64.96	6.77	40
MAG141	d__Bacteria;p__Acidobacteriota;c__Vicinamibacteria;o__Vicinamibacterales;f__UBA2999;g__JACCSI01;s__Unclassified	63.72	1513	4030082	1513	4030082	10821	2773	1694	0	4757	3731343	784	1.18	63.87	92.59	298739	61.88	7.41	21
MAG142	d__Bacteria;p__Pseudomonadota;c__Alphaproteobacteria;o__Sphingomonadales;f__Sphingomonadaceae;g__Erythrobacter;s__Unclassified	64.21	737	1924428	737	1924428	27702	2941	1371	0	2403	1770618	737	1.25	64.58	92.01	153810	59.96	7.99	33
MAG143	d__Bacteria;p__Actinomycetota;c__Actinomycetia;o__Mycobacteriales;f__Frankiaceae;g__Unclassified;s__Unclassified	72.61	410	2726154	410	2726154	35488	7534	3622	0	3226	2558139	793	1.18	72.71	93.84	168015	71.07	6.16	41
MAG144	d__Bacteria;p__Acidobacteriota;c__Blastocatellia;o__Pyrinomonadales;f__Pyrinomonadaceae;g__PSRF01;s__Unclassified	56.36	1704	3683573	1704	3683573	8572	2414	1246	0	4317	3461058	802	1.17	56.81	93.96	222515	49.35	6.04	12
MAG145	d__Bacteria;p__Actinomycetota;c__Thermoleophilia;o__Solirubrobacterales;f__70-9;g__RHKX01;s__Unclassified	70.92	484	1618149	484	1618149	16678	3762	1935	0	1996	1516053	760	1.23	71.04	93.69	102096	69.23	6.31	14
MAG146	d__Bacteria;p__Pseudomonadota;c__Gammaproteobacteria;o__Pseudomonadales;f__Pseudomonadaceae;g__Thiopseudomonas;s__Unclassified	47.29	1308	2129565	1308	2129565	8385	1652	1124	0	2818	1904067	676	1.32	47.9	89.41	225498	42.13	10.59	15
MAG147	d__Bacteria;p__Nitrospirota;c__Nitrospiria;o__Nitrospirales;f__Nitrospiraceae;g__Nitrospira_F;s__Unclassified	55.96	788	2711394	788	2711394	23910	3793	1907	0	3306	2360571	714	1.22	56.43	87.06	350823	52.81	12.94	29
MAG148	d__Bacteria;p__Pseudomonadota;c__Alphaproteobacteria;o__Acetobacterales;f__Acetobacteraceae;g__Unclassified;s__Unclassified	67.27	1057	4450305	1057	4450305	20395	5130	2064	0	5157	4058022	787	1.16	67.56	91.19	392283	64.3	8.81	46
MAG149	d__Bacteria;p__Actinomycetota;c__Actinomycetia;o__Propionibacteriales;f__Nocardioidaceae;g__Nocardioides;s__Unclassified	69.39	1014	2980586	1014	2980586	8712	3080	1956	0	3757	2703849	720	1.26	69.6	90.72	276737	67.36	9.28	42
MAG15	d__Bacteria;p__Cyanobacteriota;c__Cyanobacteriia;o__Cyanobacteriales;f__Coleofasciculaceae;g__Allocoleopsis;s__Unclassified	47.08	2943	4762836	2943	4762836	7278	1620	1090	0	5991	3954591	660	1.26	48.04	83.03	808245	42.38	16.97	70
MAG150	d__Bacteria;p__Pseudomonadota;c__Alphaproteobacteria;o__Rhodobacterales;f__Rhodobacteraceae;g__Paracoccus;s__Unclassified	60.32	1312	2209327	1312	2209327	6851	1698	1103	0	3271	1998777	611	1.48	60.78	90.47	210550	55.9	9.53	21
MAG151	d__Bacteria;p__Actinomycetota;c__Thermoleophilia;o__Solirubrobacterales;f__Solirubrobacteraceae;g__Palsa-465;s__Unclassified	70.28	728	5061061	728	5061061	36511	9181	3468	0	5501	4615743	839	1.09	70.52	91.2	445318	67.79	8.8	39
MAG152	d__Bacteria;p__Bacteroidota;c__Bacteroidia;o__Flavobacteriales;f__Flavobacteriaceae;g__JAJYTI01;s__Unclassified	35.56	141	2584402	141	2584402	154457	63649	10692	0	2322	2265087	975	0.9	36.43	87.64	319315	29.38	12.36	39
MAG153	d__Bacteria;p__Actinomycetota;c__Actinomycetia;o__Actinomycetales;f__Dermatophilaceae;g__Ornithinicoccus;s__Ornithinicoccus ciconiae	69.52	347	2804846	347	2804846	64944	12852	3519	0	2779	2571243	925	0.99	69.7	91.67	233603	67.59	8.33	33
MAG154	d__Bacteria;p__Pseudomonadota;c__Alphaproteobacteria;o__Rhizobiales;f__Xanthobacteraceae;g__Bradyrhizobium;s__Unclassified	63.26	1340	4095982	1340	4095982	14701	3302	1863	0	5014	3568350	712	1.22	63.79	87.12	527632	59.7	12.88	43
MAG155	d__Bacteria;p__Actinomycetota;c__Actinomycetia;o__Mycobacteriales;f__Mycobacteriaceae;g__Corynebacterium;s__Corynebacterium sp945649885	58.09	288	2984490	288	2984490	126967	19545	4186	0	2942	2630277	894	0.99	58.94	88.13	354213	51.76	11.87	45
MAG156	d__Bacteria;p__Actinomycetota;c__Actinomycetia;o__Streptomycetales;f__Streptomycetaceae;g__Streptomyces;s__Unclassified	69.31	1004	4914102	1004	4914102	30479	6062	2476	0	4785	4318617	903	0.97	69.55	87.88	595485	67.63	12.12	58
MAG157	d__Bacteria;p__Pseudomonadota;c__Alphaproteobacteria;o__Sphingomonadales;f__Sphingomonadaceae;g__Sphingomicrobium;s__Unclassified	65.49	527	2087943	527	2087943	23844	4844	1978	0	2373	1958550	825	1.14	65.69	93.8	129393	62.5	6.2	40
MAG158	d__Bacteria;p__Patescibacteria;c__Saccharimonadia;o__Saccharimonadales;f__UBA1547;g__JALRBM01;s__Unclassified	46.25	838	1153653	838	1153653	6337	1315	1050	0	1789	958317	536	1.55	46.96	83.07	195336	42.77	16.93	57
MAG159	d__Bacteria;p__Actinomycetota;c__Actinomycetia;o__Actinomycetales;f__Microbacteriaceae;g__Microbacterium;s__Microbacterium sp943181415	70.78	501	2524678	501	2524678	25166	6481	2501	0	2716	2362518	870	1.08	70.84	93.58	162160	69.87	6.42	41
MAG16	d__Bacteria;p__Actinomycetota;c__Actinomycetia;o__Actinomycetales;f__Cellulomonadaceae;g__Timonella;s__Unclassified	58.38	254	2499945	254	2499945	100145	17085	4082	0	2491	2260569	907	1	58.96	90.42	239376	52.93	9.58	50
MAG160	d__Bacteria;p__Actinomycetota;c__Actinomycetia;o__Propionibacteriales;f__Nocardioidaceae;g__Marmoricola;s__Unclassified	71.02	504	2718767	504	2718767	22197	6291	3087	0	3046	2523366	828	1.12	71.23	92.81	195401	68.41	7.19	37
MAG161	d__Bacteria;p__Actinomycetota;c__Actinomycetia;o__Actinomycetales;f__Micrococcaceae;g__Glutamicibacter;s__Glutamicibacter arilaitensis	59.87	240	2915490	240	2915490	129728	18953	5369	0	2895	2601204	899	0.99	60.71	89.22	314286	52.84	10.78	49
MAG162	d__Bacteria;p__Pseudomonadota;c__Gammaproteobacteria;o__Xanthomonadales;f__Rhodanobacteraceae;g__Oleiagrimonas;s__Unclassified	63.41	567	2039226	567	2039226	15054	3991	2042	0	2225	1841106	827	1.09	63.89	90.28	198120	58.98	9.72	25
MAG163	d__Bacteria;p__Chloroflexota;c__Chloroflexia;o__Thermomicrobiales;f__CADCWN01;g__CADCWN01;s__Unclassified	69.32	2253	3901875	2253	3901875	6525	1770	1136	0	5113	3385488	662	1.31	69.71	86.77	516387	66.78	13.23	28
MAG164	d__Bacteria;p__Actinomycetota;c__Acidimicrobiia;o__IMCC26256;f__JACDBD01;g__JACDBD01;s__Unclassified	69.08	948	3384834	948	3384834	42075	4002	1911	0	4231	3065586	725	1.25	69.27	90.57	319248	67.21	9.43	39
MAG165	d__Bacteria;p__Actinomycetota;c__Actinomycetia;o__Propionibacteriales;f__Nocardioidaceae;g__Nocardioides;s__Unclassified	71.76	893	3109588	893	3109588	14774	3716	2168	0	3718	2877120	774	1.2	71.9	92.52	232468	70.1	7.48	38
MAG166	d__Bacteria;p__Bacteroidota;c__Bacteroidia;o__Chitinophagales;f__Chitinophagaceae;g__Unclassified;s__Unclassified	49.55	31	3997691	31	3997691	768723	176256	71667	0	3409	3586641	1052	0.85	50.39	89.72	411050	42.23	10.28	38
MAG167	d__Bacteria;p__Acidobacteriota;c__Blastocatellia;o__Pyrinomonadales;f__Pyrinomonadaceae;g__JAIBCC01;s__Unclassified	50.52	25	4387538	25	4387538	829011	293263	97727	0	3749	3912108	1044	0.85	52.01	89.16	475430	38.29	10.84	54
MAG168	d__Bacteria;p__Actinomycetota;c__Acidimicrobiia;o__Acidimicrobiales;f__AC-14;g__CADCTB01;s__Unclassified	72.39	667	3505588	667	3505588	30046	6969	2457	0	4094	3247494	793	1.17	72.6	92.64	258094	69.87	7.36	26
MAG169	d__Bacteria;p__Patescibacteria;c__Saccharimonadia;o__Saccharimonadales;f__UBA4665;g__JAGQNO01;s__Unclassified	53.15	40	735026	40	735026	61891	26615	9484	0	828	664758	803	1.13	53.91	90.44	70268	45.97	9.56	42
MAG17	d__Bacteria;p__Bacteroidota;c__Bacteroidia;o__Chitinophagales;f__Chitinophagaceae;g__JAEWAC01;s__Unclassified	51.45	349	3905802	349	3905802	80922	16372	5240	0	3634	3448662	949	0.93	52.71	88.3	457140	41.92	11.7	32
MAG170	d__Bacteria;p__Actinomycetota;c__Thermoleophilia;o__Gaiellales;f__Gaiellaceae;g__PALSA-600;s__Unclassified	71.11	552	3142878	552	3142878	33986	7548	2788	0	3795	2983071	786	1.21	71.32	94.92	159807	67.28	5.08	39
MAG171	d__Bacteria;p__Actinomycetota;c__Actinomycetia;o__Mycobacteriales;f__Mycobacteriaceae;g__Dietzia;s__Unclassified	68.43	371	2276820	371	2276820	75055	9686	2474	0	2307	2082498	903	1.01	68.66	91.47	194322	66.02	8.53	40
MAG172	d__Bacteria;p__Acidobacteriota;c__Vicinamibacteria;o__Unclassified;f__Unclassified;g__Unclassified;s__Unclassified	68.73	1639	3205227	1639	3205227	5115	1919	1560	0	4115	3002373	730	1.28	68.9	93.67	202854	66.23	6.33	13
MAG173	d__Bacteria;p__Chloroflexota;c__Anaerolineae;o__Anaerolineales;f__EnvOPS12;g__UBA12294;s__Unclassified	53.71	1012	3491612	1012	3491612	17175	3847	2034	0	4100	3176874	775	1.17	54.5	90.99	314738	45.73	9.01	30
MAG174	d__Bacteria;p__Actinomycetota;c__Actinomycetia;o__Actinomycetales;f__Micrococcaceae;g__Arthrobacter;s__Arthrobacter oxydans	66.56	849	3092749	849	3092749	17653	4274	1934	0	3516	2815557	801	1.14	66.96	91.04	277192	62.53	8.96	30
MAG175	d__Bacteria;p__Cyanobacteriota;c__Cyanobacteriia;o__Cyanobacteriales;f__Coleofasciculaceae;g__Unclassified;s__Unclassified	45.1	1608	4726371	1608	4726371	15659	3255	1817	0	5066	3805842	751	1.07	46.24	80.52	920529	40.38	19.48	33
MAG176	d__Bacteria;p__Actinomycetota;c__Actinomycetia;o__Actinomycetales;f__Dermatophilaceae;g__Flexivirga;s__Unclassified	67.57	558	2212389	558	2212389	28827	4712	1977	0	2452	2034846	830	1.11	67.81	91.98	177543	64.81	8.02	32
MAG177	d__Archaea;p__Thermoproteota;c__Nitrososphaeria;o__Nitrososphaerales;f__Nitrososphaeraceae;g__Nitrosocosmicus;s__Nitrosocosmicus oleophilus	34.07	896	2273880	896	2273880	15096	2908	1339	0	3026	1706343	564	1.33	35.5	75.04	567537	29.77	24.96	21
MAG178	d__Bacteria;p__Bacteroidota;c__Bacteroidia;o__Chitinophagales;f__Chitinophagaceae;g__Flavisolibacter;s__Unclassified	39.6	1598	2839313	1598	2839313	8697	1838	1107	0	3931	2492358	634	1.38	40.17	87.78	346955	35.55	12.22	26
MAG179	d__Bacteria;p__Actinomycetota;c__Actinomycetia;o__Actinomycetales;f__Dermabacteraceae;g__Brachybacterium;s__Unclassified	70.26	850	3604097	850	3604097	39168	6289	1786	0	3804	3280149	862	1.06	70.33	91.01	323948	69.63	8.99	45
MAG18	d__Bacteria;p__Pseudomonadota;c__Gammaproteobacteria;o__Pseudomonadales;f__Moraxellaceae;g__Acinetobacter;s__Acinetobacter pseudolwoffii	43.66	456	1600861	456	1600861	21399	4314	1877	0	1834	1374615	750	1.15	45.24	85.87	226246	34.08	14.13	44
MAG180	d__Bacteria;p__Dormibacterota;c__Dormibacteria;o__Dormibacterales;f__Dormibacteraceae;g__40CM-4-65-16;s__Unclassified	63.86	1070	3559112	1070	3559112	14916	3776	1835	0	4577	3203196	700	1.29	64.11	90	355916	61.58	10	63
MAG181	d__Bacteria;p__Actinomycetota;c__Actinomycetia;o__Actinomycetales;f__Dermatophilaceae;g__Unclassified;s__Unclassified	70.93	826	2867339	826	2867339	11826	3704	2298	0	3342	2619711	784	1.17	71.03	91.36	247628	69.84	8.64	24
MAG182	d__Bacteria;p__Actinomycetota;c__Actinomycetia;o__Mycobacteriales;f__Mycobacteriaceae;g__Mycobacterium;s__Mycobacterium sp023460175	68.36	937	2780133	937	2780133	20919	3899	1431	0	3387	2577966	761	1.22	68.69	92.73	202167	64.16	7.27	25
MAG183	d__Bacteria;p__Bacillota;c__Bacilli;o__Bacillales_D;f__Amphibacillaceae;g__Virgibacillus_B;s__Unclassified	34.89	293	2103593	293	2103593	42736	10957	3173	0	2129	1803612	847	1.01	35.56	85.74	299981	30.83	14.26	19
MAG184	d__Bacteria;p__Actinomycetota;c__Actinomycetia;o__Actinomycetales;f__Microbacteriaceae;g__Curtobacterium;s__Unclassified	68.05	423	2538256	423	2538256	30314	8578	2742	0	2693	2337699	868	1.06	68.11	92.1	200557	67.33	7.9	30
MAG185	d__Bacteria;p__Pseudomonadota;c__Gammaproteobacteria;o__Burkholderiales;f__Burkholderiaceae_B;g__Ramlibacter;s__Unclassified	70.35	1122	2614196	1122	2614196	13635	2627	1256	0	3468	2431293	701	1.33	70.49	93	182903	68.5	7	24
MAG186	d__Bacteria;p__Pseudomonadota;c__Gammaproteobacteria;o__Burkholderiales;f__Burkholderiaceae_B;g__Ramlibacter;s__Unclassified	69.72	349	3953556	349	3953556	56376	16392	4929	0	4256	3704358	870	1.08	69.92	93.7	249198	66.84	6.3	34
MAG187	d__Bacteria;p__Actinomycetota;c__Actinomycetia;o__Propionibacteriales;f__Propionibacteriaceae;g__Luteococcus;s__Luteococcus japonicus	68.05	661	1824735	661	1824735	10200	2856	1722	0	2222	1653147	744	1.22	68.32	90.6	171588	65.49	9.4	28
MAG188	d__Bacteria;p__Actinomycetota;c__Actinomycetia;o__Mycobacteriales;f__Mycobacteriaceae;g__Corynebacterium;s__Unclassified	66.79	525	1892715	525	1892715	13574	4008	2061	0	2091	1696608	811	1.1	67.31	89.64	196107	62.23	10.36	39
MAG189	d__Bacteria;p__Pseudomonadota;c__Alphaproteobacteria;o__Sphingomonadales;f__Sphingomonadaceae;g__Allosphingosinicella;s__Unclassified	67.36	178	3183480	178	3183480	99351	32240	8120	0	3294	2910870	884	1.03	67.75	91.44	272610	63.25	8.56	45
MAG19	d__Bacteria;p__Gemmatimonadota;c__Gemmatimonadetes;o__Gemmatimonadales;f__Gemmatimonadaceae;g__JABFXC01;s__Unclassified	69.24	797	3275389	797	3275389	36288	5689	1871	0	3519	3011985	856	1.07	69.5	91.96	263404	66.25	8.04	31
MAG190	d__Bacteria;p__Acidobacteriota;c__Vicinamibacteria;o__Vicinamibacterales;f__2-12-FULL-66-21;g__JACDCA01;s__Unclassified	68.02	753	5645462	753	5645462	50744	11087	3444	0	5278	5290884	1002	0.93	68.25	93.72	354578	64.52	6.28	35
MAG191	d__Bacteria;p__Tectomicrobia;c__Entotheonellia;o__Entotheonellales;f__Entotheonellaceae;g__SXND01;s__Unclassified	59.23	2561	5418990	2561	5418990	11643	2272	1273	0	7074	4647981	657	1.31	59.68	85.77	771009	56.51	14.23	35
MAG192	d__Bacteria;p__Bacteroidota;c__Bacteroidia;o__Chitinophagales;f__Chitinophagaceae;g__Flavisolibacter;s__Unclassified	40.93	1529	2796576	1529	2796576	8545	1859	1158	0	3447	2467911	716	1.23	41.57	88.25	328665	36.07	11.75	13
MAG193	d__Bacteria;p__Acidobacteriota;c__Thermoanaerobaculia;o__UBA5704;f__UBA5704;g__UBA5704;s__Unclassified	67.95	320	8414833	320	8414833	129177	43981	13247	0	6848	7618695	1113	0.81	68.52	90.54	796138	62.5	9.46	47
MAG194	d__Bacteria;p__Acidobacteriota;c__Blastocatellia;o__Pyrinomonadales;f__Pyrinomonadaceae;g__Unclassified;s__Unclassified	45.1	955	5175170	955	5175170	24419	6603	2964	0	5369	4555401	848	1.04	46.53	88.02	619769	34.52	11.98	52
MAG195	d__Bacteria;p__Nitrospirota;c__Nitrospiria;o__Nitrospirales;f__Nitrospiraceae;g__Nitrospira_F;s__Unclassified	55.14	616	1930618	616	1930618	12062	3370	1947	0	2292	1721937	751	1.19	55.56	89.19	208681	51.63	10.81	16
MAG196	d__Bacteria;p__Pseudomonadota;c__Gammaproteobacteria;o__Xanthomonadales;f__Xanthomonadaceae;g__Thermomonas;s__Unclassified	67.38	834	2436871	834	2436871	12669	3033	1745	0	2908	2268573	780	1.19	67.53	93.09	168298	65.4	6.91	36
MAG197	d__Bacteria;p__Bacillota;c__Bacilli;o__Staphylococcales;f__Staphylococcaceae;g__Mammaliicoccus;s__Mammaliicoccus sciuri	32.52	581	1471545	581	1471545	8410	2528	1660	0	1998	1312485	657	1.36	32.97	89.19	159060	28.83	10.81	5
MAG198	d__Bacteria;p__Pseudomonadota;c__Alphaproteobacteria;o__Rhizobiales;f__Xanthobacteraceae;g__Nitrobacter;s__Unclassified	61.8	3047	4256902	3047	4256902	5633	1369	1062	0	6790	3551619	523	1.6	62.42	83.43	705283	58.71	16.57	126
MAG199	d__Bacteria;p__Actinomycetota;c__Actinomycetia;o__Mycobacteriales;f__Mycobacteriaceae;g__Corynebacterium;s__Corynebacterium crudilactis	51.47	89	2676200	89	2676200	218372	49659	13457	0	2508	2388228	952	0.94	52.23	89.24	287972	45.18	10.76	44
MAG2	d__Bacteria;p__Gemmatimonadota;c__Gemmatimonadetes;o__Longimicrobiales;f__Longimicrobiaceae;g__Longimicrobium;s__Unclassified	69.94	303	7059301	303	7059301	233313	41583	10885	0	5961	5819358	976	0.84	70.86	82.44	1239943	65.61	17.56	65
MAG20	d__Bacteria;p__Nitrospirota;c__Nitrospiria;o__Nitrospirales;f__Nitrospiraceae;g__Nitrospira_F;s__Unclassified	56.22	576	3243764	576	3243764	31720	6988	2715	0	3639	2872290	789	1.12	56.66	88.55	371474	52.81	11.45	36
MAG200	d__Bacteria;p__Actinomycetota;c__Actinomycetia;o__Mycobacteriales;f__Mycobacteriaceae;g__Dietzia;s__Dietzia aerolata	68.78	597	2816941	597	2816941	41230	7587	1880	0	2997	2546505	850	1.06	68.99	90.4	270436	66.82	9.6	34
MAG201	d__Bacteria;p__Bacillota;c__Bacilli;o__Erysipelotrichales;f__Erysipelotrichaceae;g__Erysipelothrix;s__Unclassified	37.27	291	992704	291	992704	25346	4536	1681	0	1184	928431	784	1.19	37.57	93.53	64273	32.96	6.47	22
MAG202	d__Bacteria;p__Actinomycetota;c__Actinomycetia;o__Actinomycetales;f__Dermatophilaceae;g__Terrabacter;s__Unclassified	71.68	562	3741746	562	3741746	44311	7530	3676	0	3968	3382758	853	1.06	71.82	90.41	358988	70.33	9.59	42
MAG203	d__Bacteria;p__Actinomycetota;c__Acidimicrobiia;o__Acidimicrobiales;f__JACDEA01;g__JACCXE01;s__Unclassified	67.93	808	2863437	808	2863437	15060	4070	2055	0	3601	2748111	763	1.26	68.08	95.97	115326	64.34	4.03	34
MAG204	d__Bacteria;p__Pseudomonadota;c__Gammaproteobacteria;o__Steroidobacterales;f__Steroidobacteraceae;g__SCUD01;s__Unclassified	70.09	681	1918384	681	1918384	14467	2866	1717	0	2458	1821366	741	1.28	70.29	94.94	97018	66.32	5.06	20
MAG205	d__Bacteria;p__Patescibacteria;c__SICC01;o__SICC01;f__SICC01;g__Unclassified;s__Unclassified	63.78	131	638845	131	638845	24252	6186	2440	0	785	589818	751	1.23	64.36	92.33	49027	56.78	7.67	40
MAG206	d__Bacteria;p__Actinomycetota;c__Actinomycetia;o__Actinomycetales;f__Microbacteriaceae;g__Agromyces;s__Unclassified	69.61	692	1990483	692	1990483	9406	3122	1812	0	2486	1832601	737	1.25	69.78	92.07	157882	67.59	7.93	36
MAG207	d__Bacteria;p__Acidobacteriota;c__Blastocatellia;o__Pyrinomonadales;f__Pyrinomonadaceae;g__Unclassified;s__Unclassified	55.89	2473	3476930	2473	3476930	5013	1382	1060	0	5402	3002694	556	1.55	56.14	86.36	474236	54.29	13.64	85
MAG208	d__Bacteria;p__Bacteroidota;c__Bacteroidia;o__Chitinophagales;f__Chitinophagaceae;g__Flavitalea;s__Unclassified	40.54	1494	2634531	1494	2634531	7489	1773	1134	0	3367	2423472	720	1.28	41.14	91.99	211059	33.59	8.01	17
MAG209	d__Bacteria;p__Pseudomonadota;c__Gammaproteobacteria;o__Burkholderiales;f__Burkholderiaceae_A;g__Unclassified;s__Unclassified	67.67	372	3140813	372	3140813	39521	10430	4148	0	3204	2937954	917	1.02	67.8	93.54	202859	65.77	6.46	38
MAG21	d__Bacteria;p__Pseudomonadota;c__Gammaproteobacteria;o__Xanthomonadales;f__Rhodanobacteraceae;g__Oleiagrimonas;s__Unclassified	62.66	92	3066570	92	3066570	241003	59456	20050	0	2733	2698254	987	0.89	63.32	87.99	368316	57.8	12.01	46
MAG210	d__Bacteria;p__Bacteroidota;c__Bacteroidia;o__Chitinophagales;f__Chitinophagaceae;g__Unclassified;s__Unclassified	41.56	1496	2103237	1496	2103237	4746	1380	1054	0	3029	1901634	628	1.44	42.22	90.41	201603	35.33	9.59	17
MAG211	d__Bacteria;p__Actinomycetota;c__Actinomycetia;o__Propionibacteriales;f__Propionibacteriaceae;g__Arachnia;s__Arachnia massiliensis_A	68.67	397	2543753	397	2543753	58083	9462	2901	0	2639	2347884	890	1.04	68.95	92.3	195869	65.27	7.7	30
MAG212	d__Bacteria;p__Actinomycetota;c__Actinomycetia;o__Actinomycetales;f__Micrococcaceae;g__Kocuria;s__Kocuria rosea	73.83	1402	2401651	1402	2401651	6994	1732	1109	0	3264	2158905	661	1.36	73.8	89.89	242746	74.12	10.11	37
MAG213	d__Bacteria;p__Actinomycetota;c__Thermoleophilia;o__Gaiellales;f__Gaiellaceae;g__PALSA-600;s__Unclassified	70.69	450	2364189	450	2364189	30098	6588	2614	0	2921	2274405	779	1.24	70.81	96.2	89784	67.77	3.8	37
MAG214	d__Bacteria;p__Acidobacteriota;c__Vicinamibacteria;o__Vicinamibacterales;f__UBA2999;g__12-FULL-67-14b;s__Unclassified	63.72	1593	3269148	1593	3269148	6668	2142	1384	0	4360	3058884	702	1.33	64.02	93.57	210264	59.41	6.43	21
MAG215	d__Bacteria;p__Bacillota;c__Bacilli;o__Staphylococcales;f__Salinicoccaceae;g__Jeotgalicoccus;s__Jeotgalicoccus coquinae	42.18	309	1786188	309	1786188	47763	10329	2339	0	1979	1626972	822	1.11	42.98	91.09	159216	34.06	8.91	15
MAG216	d__Bacteria;p__Pseudomonadota;c__Alphaproteobacteria;o__Caulobacterales;f__Caulobacteraceae;g__Phenylobacterium;s__Unclassified	69.71	966	2296904	966	2296904	8216	2519	1488	0	2953	2088474	707	1.29	70.06	90.93	208430	66.2	9.07	23
MAG217	d__Bacteria;p__Actinomycetota;c__Actinomycetia;o__Actinomycetales;f__Micrococcaceae;g__Glutamicibacter;s__Unclassified	58.26	399	3122926	399	3122926	96140	10312	3814	0	3205	2749482	858	1.03	58.9	88.04	373444	53.5	11.96	38
MAG218	d__Bacteria;p__Pseudomonadota;c__Gammaproteobacteria;o__Burkholderiales;f__SG8-39;g__SCGC-AG-212-J23;s__Unclassified	67.89	724	3248902	724	3248902	27408	5145	2592	0	4065	3127278	769	1.25	68.11	96.26	121624	62.33	3.74	28
MAG219	d__Bacteria;p__Pseudomonadota;c__Alphaproteobacteria;o__Sphingomonadales;f__Sphingomonadaceae;g__Sphingomicrobium;s__Unclassified	64.51	455	1593862	455	1593862	15812	4002	1931	0	1945	1468965	755	1.22	64.87	92.16	124897	60.34	7.84	34
MAG22	d__Bacteria;p__Actinomycetota;c__Acidimicrobiia;o__Acidimicrobiales;f__AC-14;g__CADCTB01;s__Unclassified	71.83	786	2649578	786	2649578	16620	3723	1874	0	3304	2476452	750	1.25	72.03	93.47	173126	69.05	6.53	33
MAG220	d__Bacteria;p__Chloroflexota;c__Limnocylindria;o__QHBO01;f__QHBO01;g__JACDBZ01;s__Unclassified	70.02	343	1836122	343	1836122	49380	7905	2408	0	2119	1725372	814	1.15	70.13	93.97	110750	68.39	6.03	36
MAG221	d__Bacteria;p__Gemmatimonadota;c__Gemmatimonadetes;o__Longimicrobiales;f__RSA9;g__Unclassified;s__Unclassified	57.57	1209	2727605	1209	2727605	15051	2627	1198	0	3624	2579439	712	1.33	57.8	94.57	148166	53.47	5.43	17
MAG222	d__Bacteria;p__Acidobacteriota;c__Vicinamibacteria;o__Vicinamibacterales;f__UBA2999;g__12-FULL-67-14b;s__Unclassified	63.98	692	4837169	692	4837169	57028	9377	3232	0	4631	4576539	988	0.96	64.33	94.61	260630	57.87	5.39	28
MAG223	d__Bacteria;p__Gemmatimonadota;c__Gemmatimonadetes;o__Gemmatimonadales;f__GWC2-71-9;g__Unclassified;s__Unclassified	69.34	436	2697482	436	2697482	29654	7455	3339	0	2890	2534664	877	1.07	69.46	93.96	162818	67.46	6.04	40
MAG224	d__Bacteria;p__Bacillota;c__Bacilli;o__Erysipelotrichales;f__Erysipelotrichaceae;g__Erysipelothrix;s__Erysipelothrix sp012520695	39.02	170	914028	170	914028	27249	8446	2452	0	1014	851094	839	1.11	39.39	93.11	62934	34.05	6.89	12
MAG225	d__Bacteria;p__Bacillota_A;c__Clostridia;o__Tissierellales;f__Peptoniphilaceae;g__Gallicola;s__Gallicola sp012798975	37.31	399	1724952	399	1724952	42409	6532	1918	0	1949	1528149	784	1.13	37.89	88.59	196803	32.81	11.41	16
MAG226	d__Bacteria;p__Eremiobacterota;c__Eremiobacteria;o__Baltobacterales;f__Baltobacteraceae;g__Unclassified;s__Unclassified	62.37	193	2580997	193	2580997	96185	28770	5435	0	2702	2470977	915	1.05	62.48	95.74	110020	59.76	4.26	35
MAG227	d__Bacteria;p__Chloroflexota;c__Limnocylindria;o__Limnocylindrales;f__CSP1-4;g__Unclassified;s__Unclassified	65.54	629	2096898	629	2096898	14964	3812	1916	0	2527	1952919	773	1.21	65.67	93.13	143979	63.78	6.87	27
MAG228	d__Bacteria;p__Patescibacteria;c__Saccharimonadia;o__Saccharimonadales;f__Unclassified;g__Unclassified;s__Unclassified	43.65	658	1442026	658	1442026	9568	2498	1197	0	2085	1252497	601	1.45	44.22	86.86	189529	39.85	13.14	77
MAG229	d__Archaea;p__Thermoproteota;c__Nitrososphaeria;o__Nitrososphaerales;f__Nitrososphaeraceae;g__Nitrososphaera;s__Unclassified	46.59	699	986295	699	986295	4485	1334	1057	0	1448	882843	610	1.47	47.11	89.51	103452	42.16	10.49	6
MAG23	d__Bacteria;p__Acidobacteriota;c__Vicinamibacteria;o__Vicinamibacterales;f__UBA2999;g__12-FULL-67-14b;s__Unclassified	63.63	1341	2906273	1341	2906273	6666	2097	1593	0	3625	2690730	742	1.25	63.96	92.58	215543	59.4	7.42	22
MAG230	d__Bacteria;p__Actinomycetota;c__Actinomycetia;o__Mycobacteriales;f__Mycobacteriaceae;g__Dietzia;s__Unclassified	69.99	598	2255665	598	2255665	22693	5239	1697	0	2530	2063808	816	1.12	70.1	91.49	191857	68.83	8.51	24
MAG231	d__Bacteria;p__Bacteroidota;c__Bacteroidia;o__Chitinophagales;f__Chitinophagaceae;g__JAEZDC01;s__Unclassified	40.21	1030	2888509	1030	2888509	11509	3225	1596	0	3403	2636187	775	1.18	40.47	91.26	252322	37.48	8.74	26
MAG232	d__Bacteria;p__Pseudomonadota;c__Gammaproteobacteria;o__Pseudomonadales;f__Moraxellaceae;g__Psychrobacter;s__Psychrobacter pasteurii	42.99	277	2343524	277	2343524	54336	15018	3953	0	2129	1957971	920	0.91	44.62	83.55	385553	34.7	16.45	35
MAG233	d__Archaea;p__Thermoproteota;c__Nitrososphaeria;o__Nitrososphaerales;f__Nitrososphaeraceae;g__Nitrosocosmicus;s__Nitrosocosmicus oleophilus	33.77	1047	1632276	1047	1632276	6344	1551	1073	0	2366	1256793	531	1.45	35.12	77	375483	29.28	23	12
MAG234	d__Bacteria;p__Acidobacteriota;c__Terriglobia;o__Bryobacterales;f__Bryobacteraceae;g__Bog-105;s__Unclassified	58.15	1215	3402779	1215	3402779	12834	3183	1592	0	3991	3174999	796	1.17	58.39	93.31	227780	54.68	6.69	27
MAG235	d__Bacteria;p__Patescibacteria;c__Saccharimonadia;o__Saccharimonadales;f__EFPC-124;g__EFPC-124;s__Unclassified	51.8	135	1015455	135	1015455	56772	10560	3808	0	1201	923895	769	1.18	52.22	90.98	91560	47.51	9.02	45
MAG236	d__Bacteria;p__Actinomycetota;c__Thermoleophilia;o__Solirubrobacterales;f__70-9;g__Unclassified;s__Unclassified	68.92	277	2815368	277	2815368	62232	17292	4540	0	3105	2661261	857	1.1	69.1	94.53	154107	65.78	5.47	27
MAG237	d__Bacteria;p__Pseudomonadota;c__Alphaproteobacteria;o__Rhizobiales;f__Rhizobiaceae;g__Paenochrobactrum;s__Paenochrobactrum gallinarii	49.71	734	1804207	734	1804207	10906	2714	1477	0	2225	1600956	720	1.23	50.75	88.73	203251	41.51	11.27	18
MAG238	d__Bacteria;p__Bacillota;c__Bacilli;o__Exiguobacterales;f__Exiguobacteraceae;g__Exiguobacterium_A;s__Exiguobacterium_A indicum	47.37	944	2266537	944	2266537	14120	2744	1303	0	3037	2042070	672	1.34	48.2	90.1	224467	39.82	9.9	21
MAG239	d__Bacteria;p__Dormibacterota;c__Dormibacteria;o__Unclassified;f__Unclassified;g__Unclassified;s__Unclassified	67.94	232	2935834	232	2935834	81378	20558	5490	0	2998	2763621	922	1.02	68.1	94.13	172213	65.29	5.87	50
MAG24	d__Bacteria;p__Actinomycetota;c__Actinomycetia;o__Actinomycetales;f__Dermatophilaceae;g__Flexivirga;s__Unclassified	69.09	444	3658411	444	3658411	45661	12676	3521	0	3738	3357582	898	1.02	69.34	91.78	300829	66.32	8.22	49
MAG240	d__Bacteria;p__Actinomycetota;c__Acidimicrobiia;o__IMCC26256;f__JACDBD01;g__JACDBD01;s__Unclassified	69.37	630	2660109	630	2660109	38139	5173	2118	0	3205	2461524	768	1.2	69.53	92.53	198585	67.34	7.47	26
MAG241	d__Bacteria;p__Bacillota;c__Bacilli;o__Lactobacillales;f__Carnobacteriaceae;g__Alkalibacterium;s__Unclassified	37.73	263	2085464	263	2085464	73743	12173	3435	0	2114	1841496	871	1.01	38.38	88.3	243968	32.87	11.7	32
MAG242	d__Bacteria;p__Chloroflexota;c__Chloroflexia;o__Thermomicrobiales;f__UBA6265;g__UBA6265;s__Unclassified	59.12	717	2083550	717	2083550	17423	3603	1401	0	2478	1898901	766	1.19	59.47	91.14	184649	55.49	8.86	24
MAG243	d__Bacteria;p__Actinomycetota;c__Actinomycetia;o__Actinomycetales;f__Microbacteriaceae;g__Microbacterium;s__Unclassified	69.69	480	1623538	480	1623538	22600	3895	1930	0	1892	1513119	800	1.17	69.86	93.2	110419	67.34	6.8	19
MAG244	d__Bacteria;p__Actinomycetota;c__Thermoleophilia;o__Gaiellales;f__Gaiellaceae;g__JACCRW01;s__Unclassified	71.92	371	2228979	371	2228979	35595	7472	2933	0	2639	2114805	801	1.18	72.12	94.88	114174	68.22	5.12	33
MAG245	d__Bacteria;p__Bacteroidota;c__Bacteroidia;o__Flavobacteriales;f__Weeksellaceae;g__MFBS3-17;s__MFBS3-17 sp014041915	43.28	406	1514399	406	1514399	38061	4424	2019	0	1736	1386252	799	1.15	44.18	91.54	128147	33.56	8.46	23
MAG246	d__Bacteria;p__Actinomycetota;c__Thermoleophilia;o__Solirubrobacterales;f__70-9;g__Unclassified;s__Unclassified	71.4	435	1641553	435	1641553	15160	4389	2117	0	1988	1531053	770	1.21	71.46	93.27	110500	70.6	6.73	34
MAG247	d__Bacteria;p__Pseudomonadota;c__Gammaproteobacteria;o__Burkholderiales;f__Nitrosomonadaceae;g__Nitrosospira;s__Nitrosospira multiformis_D	52.81	666	1882352	666	1882352	14435	3012	1648	0	2196	1637352	746	1.17	53.8	86.98	245000	46.14	13.02	18
MAG248	d__Bacteria;p__Bacillota_A;c__Clostridia;o__Peptostreptococcales;f__Anaerovoracaceae;g__VUNA01;s__VUNA01 sp002299625	50.44	226	1347880	226	1347880	51400	7750	2851	0	1364	1219458	894	1.01	51.55	90.47	128422	39.88	9.53	39
MAG249	d__Bacteria;p__Bacteroidota;c__Bacteroidia;o__Flavobacteriales;f__Weeksellaceae;g__Kaistella;s__Kaistella faecale	38.98	868	1245845	868	1245845	5458	1395	1061	0	1807	1118565	619	1.45	39.89	89.78	127280	30.95	10.22	13
MAG25	d__Bacteria;p__Pseudomonadota;c__Alphaproteobacteria;o__Sphingomonadales;f__Sphingomonadaceae;g__Unclassified;s__Unclassified	64.94	1555	1991304	1555	1991304	3848	1248	1039	0	3119	1812963	581	1.57	65.33	91.04	178341	60.91	8.96	13
MAG250	d__Bacteria;p__Pseudomonadota;c__Alphaproteobacteria;o__ATCC43930;f__Stellaceae;g__Unclassified;s__Unclassified	66.62	2025	2792370	2025	2792370	3336	1352	1054	0	4105	2561784	624	1.47	66.86	91.74	230586	63.88	8.26	14
MAG251	d__Bacteria;p__Bacteroidota;c__Bacteroidia;o__Chitinophagales;f__Chitinophagaceae;g__Hanamia;s__Unclassified	37.85	1923	2910409	1923	2910409	5045	1483	1073	0	4121	2564601	622	1.42	38.67	88.12	345808	31.8	11.88	26
MAG252	d__Bacteria;p__Pseudomonadota;c__Alphaproteobacteria;o__Sphingomonadales;f__Sphingomonadaceae;g__Sphingopyxis;s__Unclassified	63.4	706	2312077	706	2312077	16806	4106	1633	0	2753	2134038	775	1.19	63.84	92.3	178039	58.14	7.7	32
MAG253	d__Bacteria;p__Bacteroidota;c__Bacteroidia;o__Flavobacteriales;f__Flavobacteriaceae;g__JAAYLC01;s__Unclassified	36.39	387	2350196	387	2350196	41880	9089	2748	0	2454	2111667	861	1.04	37.18	89.85	238529	29.33	10.15	32
MAG254	d__Bacteria;p__Actinomycetota;c__Actinomycetia;o__Mycobacteriales;f__Mycobacteriaceae;g__Corynebacterium;s__Corynebacterium glutamicum	54.39	921	2719932	921	2719932	20899	3655	1342	0	3195	2419083	757	1.17	55.23	88.94	300849	47.68	11.06	39
MAG255	d__Bacteria;p__Dormibacterota;c__Dormibacteria;o__Dormibacterales;f__Dormibacteraceae;g__CF-28;s__Unclassified	71.32	394	2637900	394	2637900	35312	9643	3001	0	2953	2473881	838	1.12	71.43	93.78	164019	69.59	6.22	29
MAG256	d__Bacteria;p__Actinomycetota;c__Actinomycetia;o__Actinomycetales;f__Dermatophilaceae;g__Ornithinicoccus;s__Unclassified	69.59	239	4009585	239	4009585	110243	30233	6852	0	3907	3658473	936	0.97	69.82	91.24	351112	67.26	8.76	42
MAG257	d__Bacteria;p__Acidobacteriota;c__Thermoanaerobaculia;o__UBA5704;f__UBA5704;g__Unclassified;s__Unclassified	68.4	1951	6895946	1951	6895946	15536	4057	1938	0	7183	6386103	889	1.04	68.93	92.61	509843	61.86	7.39	32
MAG258	d__Bacteria;p__Actinomycetota;c__Actinomycetia;o__Propionibacteriales;f__Propionibacteriaceae;g__Unclassified;s__Unclassified	56.2	223	1488671	223	1488671	24244	7724	3663	0	1499	1366980	912	1.01	56.46	91.83	121691	53.25	8.17	31
MAG259	d__Bacteria;p__Actinomycetota;c__Actinomycetia;o__Actinomycetales;f__Microbacteriaceae;g__Microbacterium;s__Unclassified	65.45	112	2820185	112	2820185	166042	80174	18055	0	2850	2607972	915	1.01	65.69	92.48	212213	62.45	7.52	49
MAG26	d__Bacteria;p__Pseudomonadota;c__Alphaproteobacteria;o__Sphingomonadales;f__Sphingomonadaceae;g__Erythrobacter;s__Unclassified	67.57	395	1740529	395	1740529	21324	5299	2269	0	2013	1599081	794	1.16	67.85	91.87	141448	64.36	8.13	34
MAG260	d__Bacteria;p__Pseudomonadota;c__Alphaproteobacteria;o__Acetobacterales;f__Acetobacteraceae;g__CADCTG01;s__Unclassified	71.08	1417	2693121	1417	2693121	7116	1979	1197	0	3616	2329725	644	1.34	71.51	86.51	363396	68.28	13.49	16
MAG261	d__Bacteria;p__Actinomycetota;c__Thermoleophilia;o__Gaiellales;f__Gaiellaceae;g__PALSA-600;s__Unclassified	71	878	2974447	878	2974447	16493	3717	1873	0	3851	2828439	734	1.29	71.17	95.09	146008	67.56	4.91	31
MAG262	d__Bacteria;p__Actinomycetota;c__Actinomycetia;o__Mycobacteriales;f__Mycobacteriaceae;g__Corynebacterium;s__Corynebacterium sp012837295	69.84	476	2208154	476	2208154	22156	5549	2311	0	2302	1969473	856	1.04	70.19	89.19	238681	66.97	10.81	34
MAG263	d__Bacteria;p__Acidobacteriota;c__Thermoanaerobaculia;o__Gp7-AA8;f__Gp7-AA8;g__JAENWF01;s__Unclassified	62.64	676	4124555	676	4124555	35579	7553	3034	0	4367	3924456	899	1.06	62.8	95.15	200099	59.41	4.85	38
MAG264	d__Bacteria;p__Chloroflexota;c__Limnocylindria;o__P2-11E;f__P2-11E;g__CF-39;s__Unclassified	68.66	183	2611669	183	2611669	118236	33599	6419	0	2815	2464635	876	1.08	68.77	94.37	147034	66.82	5.63	38
MAG265	d__Bacteria;p__Acidobacteriota;c__Vicinamibacteria;o__Vicinamibacterales;f__UBA2999;g__JACCSI01;s__Unclassified	61.67	142	3347182	142	3347182	99085	31534	12748	0	3045	3124713	1026	0.91	61.78	93.35	222469	60.2	6.65	21
MAG266	d__Bacteria;p__Gemmatimonadota;c__Gemmatimonadetes;o__Gemmatimonadales;f__GWC2-71-9;g__Unclassified;s__Unclassified	69.34	394	3162892	394	3162892	76814	11086	3762	0	3253	2964126	911	1.03	69.48	93.72	198766	67.31	6.28	49
MAG267	d__Bacteria;p__Actinomycetota;c__Actinomycetia;o__Actinomycetales;f__Micrococcaceae;g__Kocuria;s__Unclassified	73.63	1277	2090506	1277	2090506	6988	1618	1083	0	2848	1890435	664	1.36	73.52	90.43	200071	74.74	9.57	28
MAG268	d__Bacteria;p__Chloroflexota;c__UBA6077;o__UBA6077;f__CF-72;g__Unclassified;s__Unclassified	67.39	197	4708049	197	4708049	174595	41990	10890	0	4450	4378092	984	0.95	67.45	92.99	329957	66.66	7.01	37
MAG269	d__Bacteria;p__Chloroflexota;c__Limnocylindria;o__P2-11E;f__P2-11E;g__CF-39;s__Unclassified	68.11	515	1775284	515	1775284	19907	3848	1944	0	2242	1669230	745	1.26	68.2	94.03	106054	66.75	5.97	26
MAG27	d__Bacteria;p__Actinomycetota;c__Actinomycetia;o__Actinomycetales;f__Cellulomonadaceae;g__Jonesia;s__Unclassified	57.06	578	2603370	578	2603370	21961	5709	2307	0	2814	2364450	840	1.08	57.25	90.82	238920	55.21	9.18	43
MAG270	d__Bacteria;p__Actinomycetota;c__Actinomycetia;o__Actinomycetales;f__Dermatophilaceae;g__Janibacter;s__Janibacter limosus	70.54	558	2077101	558	2077101	29395	4232	1944	0	2402	1966062	819	1.16	70.64	94.65	111039	68.71	5.35	14
MAG271	d__Bacteria;p__Myxococcota;c__Polyangia;o__Nannocystales;f__Nannocystaceae;g__Nannocystis;s__Unclassified	71.44	2074	5359270	2074	5359270	13584	2643	1680	0	6057	4847733	800	1.13	71.49	90.46	511537	71	9.54	44
MAG272	d__Bacteria;p__Pseudomonadota;c__Alphaproteobacteria;o__Sphingomonadales;f__Sphingomonadaceae;g__Allosphingosinicella;s__Unclassified	68.6	853	1947702	853	1947702	8785	2229	1606	0	2572	1764042	686	1.32	68.94	90.57	183660	65.29	9.43	19
MAG273	d__Bacteria;p__Pseudomonadota;c__Alphaproteobacteria;o__Rhodobacterales;f__Rhodobacteraceae;g__Paracoccus;s__Paracoccus sp021491915	65.32	1112	2004237	1112	2004237	7849	1862	1146	0	2856	1850730	648	1.42	65.65	92.34	153507	61.34	7.66	21
MAG274	d__Bacteria;p__Patescibacteria;c__Doudnabacteria;o__UBA920;f__2-02-FULL-46-11;g__Unclassified;s__Unclassified	48.11	100	736644	100	736644	35325	10606	3154	0	805	675726	839	1.09	48.47	91.73	60918	44.07	8.27	42
MAG275	d__Bacteria;p__Bacillota;c__Bacilli;o__Lactobacillales;f__Lactobacillaceae;g__Limosilactobacillus;s__Limosilactobacillus intestinipullorum	49.39	139	1460853	139	1460853	60642	17380	5979	0	1437	1301928	906	0.98	50.59	89.12	158925	39.52	10.88	35
MAG276	d__Bacteria;p__Actinomycetota;c__Actinomycetia;o__Actinomycetales;f__Beutenbergiaceae;g__Unclassified;s__Unclassified	68.25	274	3317768	274	3317768	84569	18754	5349	0	3200	3049074	953	0.96	68.29	91.9	268694	67.77	8.1	51
MAG277	d__Bacteria;p__Pseudomonadota;c__Alphaproteobacteria;o__Rhizobiales;f__Hyphomicrobiaceae;g__AWTP1-13;s__Unclassified	65.37	1914	4855079	1914	4855079	11276	2558	1639	0	5854	4186992	715	1.21	65.68	86.24	668087	63.39	13.76	28
MAG278	d__Bacteria;p__Acidobacteriota;c__Vicinamibacteria;o__Vicinamibacterales;f__UBA2999;g__12-FULL-67-14b;s__Unclassified	65.26	793	3646913	793	3646913	25647	7155	1885	0	3728	3487344	935	1.02	65.5	95.62	159569	60.04	4.38	17
MAG279	d__Bacteria;p__Pseudomonadota;c__Gammaproteobacteria;o__Pseudomonadales;f__Pseudomonadaceae;g__Thiopseudomonas;s__Unclassified	46.73	182	2412974	182	2412974	92118	26436	6260	0	2336	2137875	915	0.97	47.38	88.6	275099	41.68	11.4	46
MAG28	d__Bacteria;p__Actinomycetota;c__Actinomycetia;o__Actinomycetales;f__Micrococcaceae;g__Arthrobacter_K;s__Unclassified	64.42	753	3185009	753	3185009	49726	5669	1958	0	3497	2854563	816	1.1	64.86	89.62	330446	60.58	10.38	39
MAG280	d__Bacteria;p__Pseudomonadota;c__Gammaproteobacteria;o__Burkholderiales;f__Burkholderiaceae_B;g__Rhizobacter;s__Unclassified	66.36	1209	3063255	1209	3063255	9120	2771	1520	0	3891	2677536	688	1.27	66.95	87.41	385719	62.27	12.59	44
MAG281	d__Bacteria;p__Pseudomonadota;c__Alphaproteobacteria;o__Sphingomonadales;f__Sphingomonadaceae;g__Novosphingobium;s__Unclassified	66.73	56	1984476	56	1984476	182440	78870	27052	0	2000	1846962	923	1.01	66.97	93.07	137514	63.47	6.93	40
MAG282	d__Bacteria;p__Pseudomonadota;c__Alphaproteobacteria;o__Sphingomonadales;f__Sphingomonadaceae;g__Erythrobacter;s__Unclassified	67.45	973	2924000	973	2924000	14892	3224	1764	0	3627	2694600	743	1.24	67.81	92.15	229400	63.2	7.85	33
MAG283	d__Bacteria;p__Bacteroidota;c__Bacteroidia;o__Chitinophagales;f__Chitinophagaceae;g__JAEWAC01;s__Unclassified	52.01	1218	2317504	1218	2317504	9169	2032	1190	0	2822	2075184	735	1.22	53.14	89.54	242320	42.32	10.46	14
MAG284	d__Bacteria;p__Bacillota;c__Bacilli;o__Lactobacillales;f__Enterococcaceae;g__Enterococcus_B;s__Enterococcus_B faecium	38.29	147	2074740	147	2074740	98544	25114	6740	0	1991	1794123	901	0.96	39.21	86.47	280617	32.42	13.53	16
MAG285	d__Bacteria;p__Actinomycetota;c__Thermoleophilia;o__Solirubrobacterales;f__Thermoleophilaceae;g__JAAYBF01;s__Unclassified	71.34	525	2415421	525	2415421	36285	5564	2364	0	2948	2326722	789	1.22	71.45	96.33	88699	68.31	3.67	35
MAG286	d__Bacteria;p__Patescibacteria;c__Saccharimonadia;o__Saccharimonadales;f__2-12-FULL-41-12;g__Unclassified;s__Unclassified	43.06	342	657574	342	657574	6258	2035	1199	0	957	596226	623	1.46	43.74	90.67	61348	36.48	9.33	32
MAG287	d__Bacteria;p__Actinomycetota;c__Thermoleophilia;o__Solirubrobacterales;f__70-9;g__VAYN01;s__Unclassified	68.77	571	2026923	571	2026923	15880	4337	1920	0	2491	1879623	755	1.23	69.26	92.73	147300	62.45	7.27	30
MAG288	d__Bacteria;p__Bacteroidota;c__Bacteroidia;o__Sphingobacteriales;f__Sphingobacteriaceae;g__Sphingobacterium;s__Sphingobacterium alimentarium	38.9	811	2637718	811	2637718	29964	4487	1446	0	2878	2405058	836	1.09	39.82	91.18	232660	29.36	8.82	36
MAG289	d__Bacteria;p__Pseudomonadota;c__Gammaproteobacteria;o__Xanthomonadales;f__Rhodanobacteraceae;g__Tahibacter;s__Unclassified	68.08	1484	4026679	1484	4026679	17860	3038	1489	0	4452	3629010	815	1.11	68.26	90.12	397669	66.49	9.88	30
MAG29	d__Bacteria;p__Actinomycetota;c__Actinomycetia;o__Propionibacteriales;f__Propionibacteriaceae;g__Brevilactibacter;s__Unclassified	70.16	341	3067259	341	3067259	66073	14447	3834	0	3077	2826885	919	1	70.28	92.16	240374	68.74	7.84	44
MAG290	d__Bacteria;p__Actinomycetota;c__Actinomycetia;o__Actinomycetales;f__Dermatophilaceae;g__Lapillicoccus;s__Unclassified	71.2	1471	3339199	1471	3339199	13394	2579	1229	0	4401	3109221	706	1.32	71.35	93.11	229978	69.16	6.89	28
MAG291	d__Bacteria;p__Pseudomonadota;c__Gammaproteobacteria;o__Pseudomonadales;f__Cellvibrionaceae;g__Cellvibrio;s__Unclassified	47.93	1388	2299392	1388	2299392	6263	1658	1106	0	3067	2051718	669	1.33	48.53	89.23	247674	42.94	10.77	33
MAG292	d__Bacteria;p__Pseudomonadota;c__Alphaproteobacteria;o__Rhodobacterales;f__Rhodobacteraceae;g__Paracoccus;s__Paracoccus sp021491915	65.67	1054	2618206	1054	2618206	9250	2842	1354	0	3451	2424405	703	1.32	66	92.6	193801	61.56	7.4	34
MAG293	d__Bacteria;p__Actinomycetota;c__Thermoleophilia;o__Solirubrobacterales;f__70-9;g__RHKX01;s__Unclassified	71.13	423	2462676	423	2462676	31109	7657	2718	0	2771	2311182	834	1.13	71.24	93.85	151494	69.43	6.15	36
MAG294	d__Bacteria;p__Actinomycetota;c__Actinomycetia;o__Actinomycetales;f__Dermatophilaceae;g__F2B08;s__Unclassified	72.1	760	2267466	760	2267466	20146	3142	1758	0	2702	2108394	780	1.19	72.14	92.98	159072	71.58	7.02	30
MAG295	d__Archaea;p__Thermoproteota;c__Nitrososphaeria;o__Nitrososphaerales;f__Nitrososphaeraceae;g__Nitrosocosmicus;s__Nitrosocosmicus oleophilus	33.98	661	2422131	661	2422131	26357	4205	1951	0	2955	1806105	611	1.22	35.45	74.57	616026	29.68	25.43	21
MAG296	d__Bacteria;p__Actinomycetota;c__Actinomycetia;o__Actinomycetales;f__Dermatophilaceae;g__Ornithinibacter;s__Ornithinibacter sp017989115	71.24	479	2343339	479	2343339	27940	6302	2309	0	2568	2171007	845	1.1	71.4	92.65	172332	69.27	7.35	32
MAG297	d__Bacteria;p__Acidobacteriota;c__Thermoanaerobaculia;o__UBA5704;f__UBA5704;g__UBA5704;s__Unclassified	65.6	400	5400892	400	5400892	78090	23033	6865	0	4935	4777320	968	0.91	66.18	88.45	623572	61.13	11.55	24
MAG298	d__Bacteria;p__Pseudomonadota;c__Alphaproteobacteria;o__Rhizobiales;f__Beijerinckiaceae;g__Unclassified;s__Unclassified	71.5	831	3605604	831	3605604	18101	4898	2518	0	3819	3081888	807	1.06	71.23	85.47	523716	73.03	14.53	18
MAG299	d__Bacteria;p__Verrucomicrobiota;c__Verrucomicrobiae;o__Chthoniobacterales;f__UBA10450;g__CADDYX01;s__Unclassified	60.01	187	2664686	187	2664686	66657	20401	7210	0	2611	2518191	964	0.98	60.09	94.5	146495	58.6	5.5	44
MAG3	d__Bacteria;p__Pseudomonadota;c__Alphaproteobacteria;o__Sphingomonadales;f__Sphingomonadaceae;g__Allosphingosinicella;s__Unclassified	69.9	505	2909366	505	2909366	31891	7562	2733	0	3342	2657103	795	1.15	70.2	91.33	252263	66.78	8.67	36
MAG30	d__Bacteria;p__Actinomycetota;c__Actinomycetia;o__Mycobacteriales;f__Mycobacteriaceae;g__Corynebacterium;s__Unclassified	67.62	132	2146167	132	2146167	87540	26429	8191	0	2085	1955766	938	0.97	68.04	91.13	190401	63.29	8.87	38
MAG300	d__Bacteria;p__Actinomycetota;c__Actinomycetia;o__Mycobacteriales;f__Jatrophihabitantaceae;g__Jatrophihabitans_A;s__Unclassified	68.96	411	2892778	411	2892778	30080	9811	3495	0	3002	2647086	882	1.04	69.21	91.51	245692	66.27	8.49	32
MAG301	d__Bacteria;p__Actinomycetota;c__Thermoleophilia;o__Solirubrobacterales;f__70-9;g__Unclassified;s__Unclassified	71.14	614	2088634	614	2088634	15176	3743	1902	0	2515	1942806	772	1.2	71.18	93.02	145828	70.6	6.98	42
MAG302	d__Bacteria;p__Acidobacteriota;c__Blastocatellia;o__Pyrinomonadales;f__Pyrinomonadaceae;g__JAFDVJ01;s__Unclassified	53.08	396	6397020	396	6397020	135779	26450	7957	0	5545	5626281	1015	0.87	55.13	87.95	770739	38.18	12.05	61
MAG303	d__Bacteria;p__Actinomycetota;c__Actinomycetia;o__Actinomycetales;f__Micrococcaceae;g__Kocuria;s__Kocuria rosea	73.12	755	2241832	755	2241832	16050	3107	1752	0	2582	2035449	788	1.15	73.06	90.79	206383	73.73	9.21	30
MAG304	d__Bacteria;p__Dormibacterota;c__Dormibacteria;o__CF-121;f__CF-121;g__CF-13;s__Unclassified	65.95	654	2094175	654	2094175	14104	3558	1856	0	2654	1947363	734	1.27	66.19	92.99	146812	62.87	7.01	36
MAG305	d__Bacteria;p__Actinomycetota;c__Actinomycetia;o__Actinomycetales;f__Dermatophilaceae;g__Phycicoccus;s__Phycicoccus sp001428065	74.08	375	2033497	375	2033497	28170	6901	2726	0	2208	1886997	855	1.09	73.99	92.8	146500	75.2	7.2	22
MAG306	d__Bacteria;p__Pseudomonadota;c__Gammaproteobacteria;o__Burkholderiales;f__Burkholderiaceae_C;g__Paenalcaligenes;s__Unclassified	49.97	296	2393412	296	2393412	45302	11503	3879	0	2491	2185635	877	1.04	50.62	91.32	207777	43.2	8.68	35
MAG307	d__Bacteria;p__Bacteroidota;c__Bacteroidia;o__Sphingobacteriales;f__Sphingobacteriaceae;g__Sphingobacterium;s__Sphingobacterium sp020687765	43.01	646	2320744	646	2320744	28579	4916	1592	0	2442	2129256	872	1.05	43.81	91.75	191488	34.11	8.25	31
MAG308	d__Bacteria;p__Pseudomonadota;c__Gammaproteobacteria;o__Burkholderiales;f__Burkholderiaceae_C;g__Paenalcaligenes;s__Unclassified	43.17	416	2489792	416	2489792	81864	12438	2180	0	2663	2252301	846	1.07	43.78	90.46	237491	37.36	9.54	42
MAG309	d__Bacteria;p__Cyanobacteriota;c__Cyanobacteriia;o__Cyanobacteriales;f__Microcoleaceae;g__Microcoleus;s__Unclassified	46.14	3135	6122713	3135	6122713	17548	2060	1184	0	7439	4981722	670	1.21	47	81.36	1140991	42.41	18.64	63
MAG31	d__Bacteria;p__Actinomycetota;c__Actinomycetia;o__Actinomycetales;f__Microbacteriaceae;g__Agrococcus;s__Agrococcus casei	66	540	1449143	540	1449143	13096	2925	1572	0	1860	1372782	738	1.28	66.29	94.73	76361	60.89	5.27	17
MAG310	d__Bacteria;p__Nitrospirota;c__Nitrospiria;o__Nitrospirales;f__Nitrospiraceae;g__Nitrospira_F;s__Unclassified	55.14	1358	1992395	1358	1992395	4860	1451	1066	0	3042	1726809	568	1.53	55.66	86.67	265586	51.78	13.33	33
MAG311	d__Bacteria;p__Pseudomonadota;c__Alphaproteobacteria;o__Rhodobacterales;f__Rhodobacteraceae;g__Paracoccus;s__Paracoccus sp021491915	65.1	958	1594862	958	1594862	8037	1679	1109	0	2325	1470477	632	1.46	65.46	92.2	124385	60.89	7.8	19
MAG312	d__Bacteria;p__Cyanobacteriota;c__Cyanobacteriia;o__Cyanobacteriales;f__PCC-6304;g__Unclassified;s__Unclassified	47.13	1504	5207654	1504	5207654	23169	4116	1821	0	5046	4184277	829	0.97	47.92	80.35	1023377	43.91	19.65	60
MAG313	d__Bacteria;p__Bacillota_A;c__Clostridia;o__Tissierellales;f__Tissierellaceae_A;g__Unclassified;s__Unclassified	30.71	215	2056026	215	2056026	79163	16282	4060	0	2177	1874718	861	1.06	31.06	91.18	181308	27.15	8.82	16
MAG314	d__Bacteria;p__Actinomycetota;c__Actinomycetia;o__Propionibacteriales;f__Nocardioidaceae;g__Nocardioides;s__Unclassified	71.37	868	1975263	868	1975263	7187	2220	1593	0	2587	1836435	710	1.31	71.49	92.97	138828	69.84	7.03	17
MAG315	d__Bacteria;p__Actinomycetota;c__Actinomycetia;o__Actinomycetales;f__Dermabacteraceae;g__Brachybacterium;s__Brachybacterium rhamnosum	73.4	644	2947125	644	2947125	32769	5780	2173	0	3153	2716416	862	1.07	73.33	92.17	230709	74.18	7.83	42
MAG316	d__Bacteria;p__Actinomycetota;c__Actinomycetia;o__Actinomycetales;f__Dermatophilaceae;g__Ornithinimicrobium;s__Unclassified	74.06	323	2499179	323	2499179	53255	10061	3946	0	2536	2328990	918	1.01	74.03	93.19	170189	74.39	6.81	33
MAG317	d__Bacteria;p__Bacillota;c__Bacilli;o__Lactobacillales;f__Lactobacillaceae;g__Ligilactobacillus;s__Ligilactobacillus ruminis	43.8	559	1405559	559	1405559	12258	2809	1385	0	1690	1199106	710	1.2	44.95	85.31	206453	37.09	14.69	15
MAG318	d__Bacteria;p__Patescibacteria;c__Saccharimonadia;o__Saccharimonadales;f__UBA4665;g__Unclassified;s__Unclassified	49.56	56	348338	56	348338	27816	6875	3438	0	448	318561	711	1.29	50.19	91.45	29777	42.81	8.55	16
MAG319	d__Bacteria;p__Actinomycetota;c__Acidimicrobiia;o__Acidimicrobiales;f__Ilumatobacteraceae;g__JACCUL01;s__Unclassified	72.15	989	2838042	989	2838042	10834	3049	1757	0	3435	2645220	770	1.21	72.15	93.21	192822	72.18	6.79	29
MAG32	d__Bacteria;p__Bacteroidota;c__Bacteroidia;o__Chitinophagales;f__Chitinophagaceae;g__JAEWAC01;s__Unclassified	48.94	526	2038049	526	2038049	17212	4242	2391	0	2171	1733016	798	1.07	50.96	85.03	305033	37.46	14.97	19
MAG320	d__Bacteria;p__Acidobacteriota;c__Blastocatellia;o__Pyrinomonadales;f__Pyrinomonadaceae;g__Unclassified;s__Unclassified	49.98	1642	2742682	1642	2742682	7630	1692	1116	0	3611	2484690	688	1.32	51.16	90.59	257992	38.61	9.41	43
MAG321	d__Bacteria;p__Bacillota;c__Bacilli;o__Bacillales_D;f__Amphibacillaceae;g__Virgibacillus_I;s__Unclassified	34.87	485	2800220	485	2800220	37196	7917	2645	0	3007	2378355	791	1.07	35.5	84.93	421865	31.34	15.07	14
MAG322	d__Bacteria;p__Pseudomonadota;c__Alphaproteobacteria;o__Rhodobacterales;f__Rhodobacteraceae;g__Paracoccus;s__Paracoccus sp021491915	65.16	899	1428043	899	1428043	5178	1598	1093	0	2125	1318620	621	1.49	65.52	92.34	109423	60.8	7.66	14
MAG323	d__Bacteria;p__Actinomycetota;c__Actinomycetia;o__Actinomycetales;f__JAHECE01;g__JAHECE01;s__Unclassified	74.75	627	2649830	627	2649830	19844	5181	2127	0	2855	2429871	851	1.08	74.65	91.7	219959	75.84	8.3	33
MAG324	d__Bacteria;p__Pseudomonadota;c__Gammaproteobacteria;o__Pseudomonadales;f__Cellvibrionaceae;g__Cellvibrio;s__Unclassified	50.38	1062	2343788	1062	2343788	38606	2286	1192	0	2671	2101827	787	1.14	50.99	89.68	241961	45.07	10.32	14
MAG325	d__Bacteria;p__Bacillota;c__Bacilli;o__Bacillales;f__Planococcaceae;g__Sporosarcina;s__Unclassified	38.72	472	1977557	472	1977557	43744	4665	2273	0	2240	1727127	771	1.13	39.27	87.34	250430	34.93	12.66	17
MAG326	d__Bacteria;p__Eremiobacterota;c__Eremiobacteria;o__Baltobacterales;f__Baltobacteraceae;g__Unclassified;s__Unclassified	60.36	681	2696074	681	2696074	19532	4985	1999	0	3207	2571870	802	1.19	60.46	95.39	124204	58.18	4.61	28
MAG327	d__Archaea;p__Methanobacteriota;c__Methanobacteria;o__Methanobacteriales;f__Methanobacteriaceae;g__Methanosphaera;s__Methanosphaera sp022768985	30.7	409	1266062	409	1266062	16927	3486	1697	0	1123	1154724	1028	0.89	31.8	91.21	111338	19.27	8.79	5
MAG328	d__Bacteria;p__Bacillota;c__Bacilli;o__Staphylococcales;f__Salinicoccaceae;g__Jeotgalicoccus;s__Jeotgalicoccus nanhaiensis	41.91	335	1322452	335	1322452	19373	4371	2277	0	1535	1203711	784	1.16	42.76	91.02	118741	33.34	8.98	6
MAG329	d__Bacteria;p__Bacillota;c__Bacilli;o__Lactobacillales;f__Enterococcaceae;g__Enterococcus_I;s__Unclassified	38.72	571	1642843	571	1642843	18830	3551	1412	0	1928	1478751	767	1.17	39.29	90.01	164092	33.65	9.99	7
MAG33	d__Bacteria;p__Pseudomonadota;c__Alphaproteobacteria;o__Sphingomonadales;f__Sphingomonadaceae;g__Sphingomicrobium;s__Unclassified	63.81	442	1870534	442	1870534	23250	6003	1920	0	2233	1738524	779	1.19	64.08	92.94	132010	60.17	7.06	33
MAG330	d__Bacteria;p__Bacillota;c__Bacilli;o__Lactobacillales;f__Carnobacteriaceae;g__Desemzia;s__Unclassified	37.11	151	2057252	151	2057252	129785	30693	5497	0	2032	1761627	867	0.99	37.84	85.63	295625	32.73	14.37	28
MAG331	d__Bacteria;p__Bacteroidota;c__Bacteroidia;o__Flavobacteriales;f__Weeksellaceae;g__Kaistella;s__Unclassified	39.85	477	1831690	477	1831690	21875	4572	2027	0	2056	1676619	815	1.12	40.76	91.53	155071	30.04	8.47	26
MAG332	d__Bacteria;p__Pseudomonadota;c__Alphaproteobacteria;o__Rhodobacterales;f__Rhodobacteraceae;g__Paracoccus;s__Paracoccus sp021491915	65.29	1025	2992896	1025	2992896	14470	3445	1518	0	3732	2751636	737	1.25	65.68	91.94	241260	60.74	8.06	34
MAG333	d__Bacteria;p__Bacteroidota;c__Bacteroidia;o__Chitinophagales;f__Chitinophagaceae;g__Ferruginibacter;s__Unclassified	44.64	1171	3385089	1171	3385089	28595	3205	1626	0	3738	3004038	804	1.1	45.4	88.74	381051	38.61	11.26	19
MAG334	d__Bacteria;p__Patescibacteria;c__Saccharimonadia;o__Saccharimonadales;f__UBA1547;g__JAEWBQ01;s__Unclassified	50.71	73	759187	73	759187	46242	12971	4449	0	849	699330	824	1.12	51.37	92.12	59857	43.01	7.88	37
MAG335	d__Bacteria;p__Pseudomonadota;c__Gammaproteobacteria;o__Burkholderiales;f__SG8-39;g__SCGC-AG-212-J23;s__Unclassified	66.18	640	2942951	640	2942951	27708	5344	2645	0	3650	2844609	779	1.24	66.32	96.66	98342	62.32	3.34	33
MAG336	d__Bacteria;p__Acidobacteriota;c__Vicinamibacteria;o__Vicinamibacterales;f__UBA2999;g__JACCSI01;s__Unclassified	63.28	1096	3824202	1096	3824202	20827	3898	1993	0	4264	3557160	834	1.12	63.41	93.02	267042	61.49	6.98	17
MAG337	d__Bacteria;p__Bacteroidota;c__Bacteroidia;o__Sphingobacteriales;f__Sphingobacteriaceae;g__Sphingobacterium;s__Sphingobacterium sp020687765	43.17	623	2339374	623	2339374	29214	5353	1583	0	2400	2164371	902	1.03	43.92	92.52	175003	33.84	7.48	37
MAG338	d__Bacteria;p__Verrucomicrobiota;c__Verrucomicrobiae;o__Verrucomicrobiales;f__Akkermansiaceae;g__Luteolibacter;s__Unclassified	64.19	148	4873652	148	4873652	161179	51169	16036	0	4205	4404117	1047	0.86	64.63	90.37	469535	60.05	9.63	40
MAG339	d__Bacteria;p__Nitrospirota;c__Nitrospiria;o__Nitrospirales;f__Nitrospiraceae;g__Nitrospira_C;s__Unclassified	57.16	448	3140027	448	3140027	39633	9342	3390	0	3493	2797956	801	1.11	57.43	89.11	342071	54.91	10.89	40
MAG34	d__Bacteria;p__Actinomycetota;c__Thermoleophilia;o__Solirubrobacterales;f__70-9;g__VAYN01;s__Unclassified	69.44	40	2794018	40	2794018	534048	141787	48165	0	2768	2588448	935	0.99	69.96	92.64	205570	62.86	7.36	49
MAG340	d__Bacteria;p__Pseudomonadota;c__Alphaproteobacteria;o__Sphingomonadales;f__Sphingomonadaceae;g__Sphingomicrobium;s__Unclassified	63.76	331	1514446	331	1514446	35348	5668	2409	0	1766	1416750	802	1.17	64.04	93.55	97696	59.71	6.45	23
MAG341	d__Bacteria;p__Myxococcota;c__Myxococcia;o__Myxococcales;f__40CM-4-68-19;g__40CM-4-68-19;s__Unclassified	70.48	316	4032365	316	4032365	130006	21311	6492	0	3973	3781593	952	0.99	70.59	93.78	250772	68.81	6.22	42
MAG342	d__Archaea;p__Thermoproteota;c__Nitrososphaeria;o__Nitrososphaerales;f__Nitrososphaeraceae;g__Nitrosocosmicus;s__Unclassified	35.75	1884	2367892	1884	2367892	3956	1228	1040	0	3687	1883508	511	1.56	36.69	79.54	484384	32.11	20.46	17
MAG343	d__Bacteria;p__Pseudomonadota;c__Gammaproteobacteria;o__Pseudomonadales;f__Pseudomonadaceae;g__Thiopseudomonas;s__Unclassified	47.2	181	1687887	181	1687887	50651	15300	3887	0	1664	1499490	901	0.99	47.87	88.84	188397	41.88	11.16	28
MAG344	d__Bacteria;p__Actinomycetota;c__Actinomycetia;o__Actinomycetales;f__Dermatophilaceae;g__F2B08;s__Unclassified	72.39	511	2280815	511	2280815	43526	5275	2291	0	2531	2132442	843	1.11	72.42	93.49	148373	71.92	6.51	31
MAG345	d__Bacteria;p__Bacteroidota;c__Bacteroidia;o__Flavobacteriales;f__Flavobacteriaceae;g__Flavobacterium;s__Unclassified	39.64	161	3255620	161	3255620	217015	36489	9297	0	2996	3029694	1011	0.92	40.35	93.06	225926	30.14	6.94	38
MAG346	d__Bacteria;p__Gemmatimonadota;c__Gemmatimonadetes;o__Gemmatimonadales;f__Gemmatimonadaceae;g__JABFXC01;s__Unclassified	69.97	468	3470082	468	3470082	60268	10913	3325	0	3391	3160458	932	0.98	70.24	91.08	309624	67.15	8.92	31
MAG347	d__Archaea;p__Thermoproteota;c__Nitrososphaeria;o__Nitrososphaerales;f__Nitrososphaeraceae;g__Nitrososphaera;s__Unclassified	45.71	489	683478	489	683478	5246	1365	1052	0	1015	617076	608	1.49	46.41	90.28	66402	39.18	9.72	3
MAG348	d__Bacteria;p__Bacteroidota;c__Bacteroidia;o__Chitinophagales;f__Chitinophagaceae;g__Segetibacter;s__Unclassified	37.58	840	2057921	840	2057921	9929	2466	1634	0	2632	1793583	681	1.28	38.48	87.16	264338	31.44	12.84	12
MAG349	d__Bacteria;p__Actinomycetota;c__Actinomycetia;o__Actinomycetales;f__Microbacteriaceae;g__Curtobacterium;s__Curtobacterium sp002412165	72.42	606	2372610	606	2372610	19576	4797	1987	0	2667	2150268	806	1.12	72.38	90.63	222342	72.84	9.37	28
MAG35	d__Bacteria;p__Pseudomonadota;c__Gammaproteobacteria;o__Burkholderiales;f__SG8-39;g__SCGC-AG-212-J23;s__Unclassified	66.18	797	3412891	797	3412891	29718	5128	2109	0	4256	3289821	773	1.25	66.34	96.39	123070	61.97	3.61	25
MAG350	d__Bacteria;p__Chloroflexota;c__Limnocylindria;o__QHBO01;f__Unclassified;g__Unclassified;s__Unclassified	71.41	1618	2668570	1618	2668570	8116	1663	1088	0	3762	2508900	667	1.41	71.37	94.02	159670	72.06	5.98	16
MAG351	d__Bacteria;p__Acidobacteriota;c__Terriglobia;o__Bryobacterales;f__Bryobacteraceae;g__Bog-105;s__Unclassified	59.26	946	2732967	946	2732967	12872	3059	1786	0	3224	2519730	782	1.18	59.5	92.2	213237	56.35	7.8	27
MAG352	d__Bacteria;p__Actinomycetota;c__Actinomycetia;o__Actinomycetales;f__Brevibacteriaceae;g__Brevibacterium;s__Brevibacterium intestinigallinarum	70.85	315	1707721	315	1707721	38888	6925	2533	0	1749	1578000	902	1.02	71.04	92.4	129721	68.55	7.6	30
MAG353	d__Bacteria;p__Actinomycetota;c__Actinomycetia;o__Actinomycetales;f__Dermabacteraceae;g__Brachybacterium;s__Brachybacterium muris	70.66	442	2304105	442	2304105	30658	6702	2506	0	2399	2113161	881	1.04	70.75	91.71	190944	69.73	8.29	43
MAG354	d__Bacteria;p__Pseudomonadota;c__Gammaproteobacteria;o__Burkholderiales;f__Burkholderiaceae_B;g__Ramlibacter;s__Unclassified	70.26	680	3154305	680	3154305	25323	6000	2315	0	3676	2930703	797	1.17	70.42	92.91	223602	68.16	7.09	30
MAG355	d__Bacteria;p__Actinomycetota;c__Actinomycetia;o__Actinomycetales;f__Microbacteriaceae;g__NC76-1;s__Unclassified	57.98	218	1872963	218	1872963	58485	12783	3954	0	1963	1754562	894	1.05	58.29	93.68	118401	53.4	6.32	35
MAG356	d__Bacteria;p__Pseudomonadota;c__Alphaproteobacteria;o__Rhizobiales;f__Xanthobacteraceae;g__Tardiphaga;s__Unclassified	64.92	876	2547777	876	2547777	14683	3055	1753	0	3021	2296710	760	1.19	65.37	90.15	251067	60.83	9.85	25
MAG357	d__Bacteria;p__Patescibacteria;c__Saccharimonadia;o__Saccharimonadales;f__UBA4665;g__Unclassified;s__Unclassified	50.6	292	534890	292	534890	6439	1897	1128	0	779	496863	638	1.46	51.38	92.89	38027	40.48	7.11	16
MAG358	d__Bacteria;p__Bacteroidota;c__Bacteroidia;o__Chitinophagales;f__Chitinophagaceae;g__Flavisolibacter;s__Unclassified	41.3	623	2766276	623	2766276	25477	5170	2482	0	2782	2478258	891	1.01	41.83	89.59	288018	36.77	10.41	12
MAG359	d__Bacteria;p__Acidobacteriota;c__Thermoanaerobaculia;o__UBA5704;f__UBA5704;g__UBA5704;s__Unclassified	67.59	1372	4091403	1372	4091403	12708	3261	1859	0	4579	3739584	817	1.12	68.11	91.4	351819	62.02	8.6	30
MAG36	d__Bacteria;p__Chloroflexota;c__Ktedonobacteria;o__Ktedonobacterales;f__JADMIN01;g__JAKAIY01;s__Unclassified	66.69	1606	2840417	1606	2840417	7713	1803	1151	0	3640	2415150	664	1.28	67.07	85.03	425267	64.52	14.97	26
MAG360	d__Bacteria;p__Chloroflexota;c__Ktedonobacteria;o__Ktedonobacterales;f__JADMIN01;g__JAKAIY01;s__Unclassified	66.88	1178	3657545	1178	3657545	14084	3430	1799	0	4000	3121893	780	1.09	67.26	85.35	535652	64.69	14.65	30
MAG361	d__Archaea;p__Thermoproteota;c__Nitrososphaeria;o__Nitrososphaerales;f__Nitrososphaeraceae;g__Nitrosocosmicus;s__Unclassified	30.5	1265	2486772	1265	2486772	15766	2021	1189	0	3347	1847166	552	1.35	32.05	74.28	639606	26.02	25.72	40
MAG362	d__Bacteria;p__Bacillota;c__Bacilli;o__Lactobacillales;f__Streptococcaceae;g__Streptococcus;s__Streptococcus alactolyticus	41.02	105	1458263	105	1458263	63599	23783	7017	0	1480	1308747	884	1.01	41.88	89.75	149516	33.48	10.25	20
MAG363	d__Bacteria;p__Pseudomonadota;c__Gammaproteobacteria;o__Pseudomonadales;f__Pseudomonadaceae;g__Thiopseudomonas;s__Thiopseudomonas sp012518175	49.53	267	1990305	267	1990305	42676	9595	3718	0	2068	1799478	870	1.04	50.05	90.41	190827	44.61	9.59	29
MAG364	d__Bacteria;p__Acidobacteriota;c__Blastocatellia;o__Pyrinomonadales;f__Pyrinomonadaceae;g__OLB17;s__Unclassified	56.59	957	3258637	957	3258637	15966	3908	1875	0	3684	2951121	801	1.13	57.43	90.56	307516	48.55	9.44	26
MAG365	d__Bacteria;p__Actinomycetota;c__Actinomycetia;o__Streptosporangiales;f__Streptosporangiaceae;g__Nocardiopsis;s__Unclassified	67.21	1066	5250745	1066	5250745	52322	6021	2535	0	5588	4535538	812	1.06	67.73	86.38	715207	63.92	13.62	35
MAG366	d__Bacteria;p__Patescibacteria;c__Saccharimonadia;o__Saccharimonadales;f__UBA4665;g__Unclassified;s__Unclassified	51.76	158	818148	158	818148	53314	8198	1956	0	1038	739803	713	1.27	52.55	90.42	78345	44.3	9.58	39
MAG367	d__Bacteria;p__Actinomycetota;c__Actinomycetia;o__Mycobacteriales;f__Mycobacteriaceae;g__Corynebacterium;s__Corynebacterium sp012837295	70.15	367	2014256	367	2014256	26095	7430	2657	0	2019	1816773	900	1	70.43	90.2	197483	67.58	9.8	31
MAG368	d__Bacteria;p__Actinomycetota;c__Actinomycetia;o__Actinomycetales;f__Micrococcaceae;g__Arthrobacter_H;s__Arthrobacter_H sp016892645	68.63	458	2874766	458	2874766	41394	8410	3001	0	3028	2632545	869	1.05	68.88	91.57	242221	65.92	8.43	35
MAG369	d__Bacteria;p__Actinomycetota;c__Actinomycetia;o__Actinomycetales;f__Dermatophilaceae;g__Serinicoccus;s__Unclassified	72.55	235	2749032	235	2749032	75221	16691	5156	0	2648	2543646	961	0.96	72.68	92.53	205386	70.97	7.47	41
MAG37	d__Bacteria;p__Dormibacterota;c__Dormibacteria;o__CF-121;f__Unclassified;g__Unclassified;s__Unclassified	66.55	2493	4879743	2493	4879743	7371	2065	1296	0	7174	4149324	578	1.47	66.85	85.03	730419	64.86	14.97	112
MAG370	d__Bacteria;p__Actinomycetota;c__Actinomycetia;o__Actinomycetales;f__Micrococcaceae;g__Kocuria;s__Unclassified	73.8	1122	1758287	1122	1758287	5956	1548	1082	0	2413	1589511	659	1.37	73.68	90.4	168776	74.86	9.6	33
MAG371	d__Bacteria;p__Pseudomonadota;c__Alphaproteobacteria;o__Sphingomonadales;f__Sphingomonadaceae;g__Allosphingosinicella;s__Unclassified	68.35	125	3001254	125	3001254	146143	38156	12504	0	3180	2784003	875	1.06	68.69	92.76	217251	63.99	7.24	42
MAG372	d__Bacteria;p__Nitrospirota;c__Nitrospiria;o__Nitrospirales;f__Nitrospiraceae;g__Nitrospira_F;s__Unclassified	56.06	903	2814884	903	2814884	12550	3323	1859	0	3497	2500062	715	1.24	56.48	88.82	314822	52.72	11.18	30
MAG373	d__Bacteria;p__Actinomycetota;c__Thermoleophilia;o__Solirubrobacterales;f__70-9;g__RHKX01;s__Unclassified	71.08	360	2562301	360	2562301	56588	10732	3159	0	2785	2403669	863	1.09	71.22	93.81	158632	69.09	6.19	28
MAG374	d__Bacteria;p__Actinomycetota;c__Actinomycetia;o__JAHEKZ01;f__JAHEKZ01;g__Unclassified;s__Unclassified	68.82	952	2258036	952	2258036	8902	2534	1576	0	2941	2080608	707	1.3	68.91	92.14	177428	67.78	7.86	31
MAG375	d__Bacteria;p__Actinomycetota;c__Thermoleophilia;o__Gaiellales;f__Gaiellaceae;g__GMQP-bins7;s__Unclassified	71.64	725	2036338	725	2036338	12745	2874	1700	0	2675	1923903	719	1.31	71.72	94.48	112435	70.28	5.52	25
MAG376	d__Bacteria;p__Nitrospirota;c__Nitrospiria;o__Nitrospirales;f__Nitrospiraceae;g__Nitrospira_C;s__Unclassified	57.46	712	2299937	712	2299937	12428	3490	1922	0	2812	2071197	737	1.22	57.67	90.05	228740	55.47	9.95	28
MAG377	d__Bacteria;p__Actinomycetota;c__Actinomycetia;o__Mycobacteriales;f__Mycobacteriaceae;g__Corynebacterium;s__Unclassified	60.29	620	3671110	620	3671110	119048	22378	1771	0	4203	3328695	792	1.14	60.57	90.67	342415	57.55	9.33	66
MAG378	d__Bacteria;p__Acidobacteriota;c__Blastocatellia;o__Pyrinomonadales;f__Pyrinomonadaceae;g__Unclassified;s__Unclassified	52.83	1098	3147570	1098	3147570	21512	3483	1445	0	3513	2832828	806	1.12	53.95	90	314742	42.78	10	28
MAG379	d__Bacteria;p__Patescibacteria;c__Saccharimonadia;o__Saccharimonadales;f__UBA1547;g__JALRBM01;s__Unclassified	48.39	96	529760	96	529760	36119	10635	2415	0	654	474204	725	1.23	49.05	89.51	55556	42.73	10.49	19
MAG38	d__Bacteria;p__Actinomycetota;c__Actinomycetia;o__Actinomycetales;f__Dermatophilaceae;g__Terrabacter;s__Unclassified	71.61	517	2299532	517	2299532	26281	5343	2335	0	2614	2126013	813	1.14	71.71	92.45	173519	70.3	7.55	21
MAG380	d__Archaea;p__Thermoproteota;c__Nitrososphaeria;o__Nitrososphaerales;f__Nitrososphaeraceae;g__Nitrosocosmicus;s__Nitrosocosmicus oleophilus	35.33	1533	2602960	1533	2602960	9097	1703	1122	0	3589	2059962	574	1.38	36.62	79.14	542998	30.44	20.86	31
MAG381	d__Bacteria;p__Acidobacteriota;c__Blastocatellia;o__Pyrinomonadales;f__Pyrinomonadaceae;g__OLB17;s__Unclassified	54.23	570	3359593	570	3359593	38380	7550	2904	0	3745	3054426	816	1.11	55	90.92	305167	46.58	9.08	48
MAG382	d__Bacteria;p__Chloroflexota;c__UBA5177;o__UBA5177;f__UBA5177;g__Unclassified;s__Unclassified	66.59	737	3465571	737	3465571	30794	5807	2414	0	3761	3118638	829	1.09	66.84	89.99	346933	64.36	10.01	37
MAG383	d__Bacteria;p__Pseudomonadota;c__Gammaproteobacteria;o__Pseudomonadales;f__Moraxellaceae;g__Acinetobacter;s__Acinetobacter pseudolwoffii	44.04	653	1864144	653	1864144	15190	3446	1444	0	2216	1610733	727	1.19	45.57	86.41	253411	34.34	13.59	38
MAG384	d__Bacteria;p__Actinomycetota;c__Actinomycetia;o__Actinomycetales;f__Microbacteriaceae;g__NC76-1;s__Unclassified	57.97	352	1456196	352	1456196	16178	4775	2201	0	1689	1366743	809	1.16	58.27	93.86	89453	53.41	6.14	28
MAG385	d__Bacteria;p__Actinomycetota;c__Acidimicrobiia;o__Acidimicrobiales;f__JAAYBP01;g__Unclassified;s__Unclassified	72.88	870	3542671	870	3542671	22543	4743	2120	0	3930	3283281	835	1.11	72.81	92.68	259390	73.85	7.32	36
MAG386	d__Bacteria;p__Actinomycetota;c__Actinomycetia;o__Mycobacteriales;f__CADCTP01;g__CADCTP01;s__Unclassified	71.91	1208	3420876	1208	3420876	9623	2939	1919	0	4302	3073923	715	1.26	72.05	89.86	346953	70.67	10.14	31
MAG387	d__Bacteria;p__Myxococcota;c__Polyangia;o__Nannocystales;f__Nannocystaceae;g__Nannocystis;s__Unclassified	72.79	1982	5644295	1982	5644295	17293	3188	1617	0	6217	5049147	812	1.1	72.66	89.46	595148	73.87	10.54	40
MAG388	d__Bacteria;p__Patescibacteria;c__Saccharimonadia;o__Saccharimonadales;f__UBA4665;g__Unclassified;s__Unclassified	54.44	381	1578550	381	1578550	26502	4964	2225	0	2361	1427469	605	1.5	55.04	90.43	151081	48.75	9.57	42
MAG389	d__Bacteria;p__Pseudomonadota;c__Alphaproteobacteria;o__Sphingomonadales;f__Sphingomonadaceae;g__Sphingomicrobium;s__Unclassified	61.59	210	3501750	210	3501750	92337	27612	7883	0	3656	3161718	865	1.04	61.92	90.29	340032	58.56	9.71	45
MAG39	d__Bacteria;p__Pseudomonadota;c__Gammaproteobacteria;o__Xanthomonadales;f__Rhodanobacteraceae;g__Rhodanobacter;s__Unclassified	69.44	529	2150288	529	2150288	28926	4685	2085	0	2426	1965465	810	1.13	69.75	91.4	184823	66.08	8.6	21
MAG390	d__Bacteria;p__Gemmatimonadota;c__Gemmatimonadetes;o__Gemmatimonadales;f__Gemmatimonadaceae;g__AG11;s__Unclassified	69.65	261	3578543	261	3578543	76330	24653	6143	0	3431	3311814	965	0.96	69.86	92.55	266729	67.1	7.45	44
MAG391	d__Bacteria;p__Acidobacteriota;c__Blastocatellia;o__Pyrinomonadales;f__Pyrinomonadaceae;g__Unclassified;s__Unclassified	49.94	806	5272015	806	5272015	61834	9658	3079	0	5043	4777827	947	0.96	51.18	90.63	494188	38	9.37	55
MAG392	d__Bacteria;p__Bacteroidota;c__Bacteroidia;o__Flavobacteriales;f__Weeksellaceae;g__Moheibacter;s__Unclassified	34.58	97	2655262	97	2655262	205843	94256	15536	0	2479	2418951	976	0.93	35.27	91.1	236311	27.5	8.9	30
MAG393	d__Bacteria;p__Bacteroidota;c__Bacteroidia;o__Flavobacteriales;f__Flavobacteriaceae;g__JAJYTI01;s__Unclassified	37.47	242	2357757	242	2357757	114839	15021	4448	0	2234	2062854	923	0.95	38.4	87.49	294903	30.93	12.51	32
MAG394	d__Bacteria;p__Actinomycetota;c__Actinomycetia;o__Actinomycetales;f__Microbacteriaceae;g__Amnibacterium;s__Unclassified	73.05	582	1950263	582	1950263	13454	3683	1840	0	2367	1811205	765	1.21	73.06	92.87	139058	72.97	7.13	25
MAG395	d__Bacteria;p__Gemmatimonadota;c__Gemmatimonadetes;o__Gemmatimonadales;f__GWC2-71-9;g__Unclassified;s__Unclassified	71.16	1231	2195042	1231	2195042	7625	1841	1133	0	3054	2077341	680	1.39	71.28	94.64	117701	68.98	5.36	17
MAG396	d__Bacteria;p__Actinomycetota;c__Thermoleophilia;o__Solirubrobacterales;f__70-9;g__Unclassified;s__Unclassified	71.23	350	2145470	350	2145470	33026	7343	3404	0	2384	2000646	839	1.11	71.26	93.25	144824	70.8	6.75	40
MAG397	d__Bacteria;p__Actinomycetota;c__Actinomycetia;o__Propionibacteriales;f__Nocardioidaceae;g__Aeromicrobium;s__Unclassified	71.7	579	2514680	579	2514680	21230	5540	2130	0	2894	2373588	820	1.15	71.87	94.39	141092	68.68	5.61	35
MAG398	d__Bacteria;p__Pseudomonadota;c__Alphaproteobacteria;o__Sphingomonadales;f__Sphingomonadaceae;g__Sphingomonas_I;s__Unclassified	64.13	231	4361135	231	4361135	90001	29246	8489	0	4413	3943842	894	1.01	64.46	90.43	417293	60.92	9.57	43
MAG399	d__Bacteria;p__Acidobacteriota;c__Blastocatellia;o__Pyrinomonadales;f__Pyrinomonadaceae;g__PSRF01;s__Unclassified	51.15	2005	3251183	2005	3251183	7066	1612	1098	0	4328	2837388	656	1.33	51.54	87.27	413795	48.47	12.73	52
MAG4	d__Bacteria;p__Bacillota;c__Bacilli;o__Lactobacillales;f__Aerococcaceae;g__Aerococcus;s__Aerococcus urinaeequi	39.98	366	1408791	366	1408791	24787	5765	1683	0	1498	1228293	820	1.06	40.86	87.19	180498	33.99	12.81	8
MAG40	d__Bacteria;p__Acidobacteriota;c__Thermoanaerobaculia;o__UBA5704;f__UBA5704;g__UBA5704;s__Unclassified	68.09	350	7547696	350	7547696	178317	39261	10626	0	6094	6955551	1141	0.81	68.6	92.15	592145	62.11	7.85	45
MAG400	d__Bacteria;p__Bacteroidota;c__Bacteroidia;o__Flavobacteriales;f__Weeksellaceae;g__Chryseobacterium;s__Chryseobacterium cucumeris	36.32	360	4790090	360	4790090	69834	20652	5864	0	4547	4261140	937	0.95	37.44	88.96	528950	27.29	11.04	61
MAG401	d__Bacteria;p__Deinococcota;c__Deinococci;o__Deinococcales;f__Deinococcaceae;g__Deinococcus;s__Deinococcus radiopugnans	67.64	1293	3002843	1293	3002843	11771	2523	1297	0	3822	2641770	691	1.27	68.3	87.98	361073	62.79	12.02	40
MAG402	d__Bacteria;p__Bacteroidota;c__Bacteroidia;o__Flavobacteriales;f__Flavobacteriaceae;g__Flavobacterium;s__Flavobacterium sp018384465	33.87	321	2532976	321	2532976	45530	14084	3332	0	2618	2269431	867	1.03	34.65	89.6	263545	27.2	10.4	47
MAG403	d__Bacteria;p__Pseudomonadota;c__Alphaproteobacteria;o__Caulobacterales;f__Caulobacteraceae;g__Brevundimonas;s__Brevundimonas sp002979535	66.82	1306	2209028	1306	2209028	6777	1717	1113	0	3222	1993050	619	1.46	67.33	90.22	215978	62.08	9.78	32
MAG404	d__Bacteria;p__Gemmatimonadota;c__Gemmatimonadetes;o__Gemmatimonadales;f__Gemmatimonadaceae;g__JABFXC01;s__Unclassified	69.54	577	3008018	577	3008018	40702	7759	2329	0	3077	2773098	901	1.02	69.81	92.19	234920	66.27	7.81	26
MAG405	d__Bacteria;p__Pseudomonadota;c__Gammaproteobacteria;o__Xanthomonadales;f__Rhodanobacteraceae;g__66-474;s__Unclassified	62.3	321	2498849	321	2498849	38759	11411	3643	0	2513	2278860	907	1.01	62.62	91.2	219989	58.89	8.8	34
MAG406	d__Bacteria;p__Nitrospirota;c__Nitrospiria;o__Nitrospirales;f__Nitrospiraceae;g__Nitrospira_F;s__Unclassified	57.03	1243	2495982	1243	2495982	9167	2148	1186	0	3335	2225001	667	1.34	57.33	89.14	270981	54.57	10.86	28
MAG407	d__Bacteria;p__Actinomycetota;c__Actinomycetia;o__Actinomycetales;f__Dermatophilaceae;g__Piscicoccus;s__Piscicoccus intestinalis	71.95	363	3803277	363	3803277	82004	11100	6228	0	3622	3361110	928	0.95	72.11	88.37	442167	70.75	11.63	26
MAG408	d__Bacteria;p__Bacteroidota;c__Bacteroidia;o__Chitinophagales;f__Chitinophagaceae;g__Flavisolibacter;s__Unclassified	53.02	577	5152912	577	5152912	45753	12343	4198	0	4655	4531017	973	0.9	53.93	87.93	621895	46.4	12.07	41
MAG409	d__Bacteria;p__Bacteroidota;c__Bacteroidia;o__Flavobacteriales;f__Flavobacteriaceae;g__Flavobacterium;s__Unclassified	38.91	266	2114782	266	2114782	51689	11106	3848	0	2155	1944714	902	1.02	39.52	91.96	170068	31.87	8.04	25
MAG41	d__Bacteria;p__Pseudomonadota;c__Gammaproteobacteria;o__Pseudomonadales;f__Moraxellaceae;g__Acinetobacter;s__Acinetobacter bohemicus	40.71	1578	2634564	1578	2634564	7677	1681	1109	0	3625	2224863	614	1.38	41.7	84.45	409701	35.29	15.55	44
MAG410	d__Bacteria;p__Pseudomonadota;c__Gammaproteobacteria;o__Steroidobacterales;f__Steroidobacteraceae;g__RPQJ01;s__Unclassified	68.81	611	3404704	611	3404704	29270	6699	2984	0	3514	3143667	895	1.03	69.03	92.33	261037	66.14	7.67	33
MAG411	d__Bacteria;p__Pseudomonadota;c__Alphaproteobacteria;o__Rhodobacterales;f__Rhodobacteraceae;g__Roseovarius;s__Unclassified	59.6	331	2903912	331	2903912	53383	13269	4125	0	2965	2622273	884	1.02	60.17	90.3	281639	54.36	9.7	29
MAG412	d__Bacteria;p__Actinomycetota;c__Actinomycetia;o__Actinomycetales;f__Microbacteriaceae;g__Agrococcus;s__Unclassified	65.3	298	1759681	298	1759681	41170	8544	2590	0	1908	1666704	874	1.08	65.62	94.72	92977	59.59	5.28	28
MAG413	d__Archaea;p__Thermoproteota;c__Nitrososphaeria;o__Nitrososphaerales;f__Nitrososphaeraceae;g__TH1177;s__Unclassified	30.43	659	1497355	659	1497355	6223	2274	1608	0	1954	1192629	610	1.3	31.91	79.65	304726	24.65	20.35	13
MAG414	d__Bacteria;p__Pseudomonadota;c__Alphaproteobacteria;o__Rhodobacterales;f__Rhodobacteraceae;g__Paracoccus;s__Unclassified	64.46	385	2785828	385	2785828	39637	9311	3507	0	2979	2564367	861	1.07	64.82	92.05	221461	60.27	7.95	34
MAG415	d__Archaea;p__Thermoplasmatota;c__E2;o__JACPAO01;f__JAHFTW01;g__Unclassified;s__Unclassified	71.76	418	2103725	418	2103725	28056	6232	2517	0	2459	1922313	782	1.17	71.85	91.38	181412	70.74	8.62	32
MAG416	d__Bacteria;p__Pseudomonadota;c__Gammaproteobacteria;o__Xanthomonadales;f__Xanthomonadaceae;g__Lysobacter_B;s__Lysobacter_B sp011300685	56.99	548	1288750	548	1288750	12914	2598	1264	0	1699	1221564	719	1.32	57.16	94.79	67186	54.04	5.21	17
MAG417	d__Bacteria;p__Pseudomonadota;c__Alphaproteobacteria;o__Sphingomonadales;f__Sphingomonadaceae;g__Allosphingosinicella;s__Unclassified	67.91	718	3510183	718	3510183	25845	5993	2488	0	3889	3134349	806	1.11	68.36	89.29	375834	64.1	10.71	43
MAG418	d__Bacteria;p__Bacteroidota;c__Bacteroidia;o__Flavobacteriales;f__Weeksellaceae;g__Kaistella;s__Unclassified	42.59	196	2043015	196	2043015	63084	14959	4782	0	1993	1872072	939	0.98	43.58	91.63	170943	31.8	8.37	19
MAG419	d__Bacteria;p__Cyanobacteriota;c__Cyanobacteriia;o__Cyanobacteriales;f__Chroococcidiopsidaceae;g__Chroococcidiopsis;s__Chroococcidiopsis thermalis	44.48	1038	5886466	1038	5886466	33765	6796	3074	0	6038	4965927	822	1.03	45.43	84.36	920539	39.37	15.64	34
MAG42	d__Bacteria;p__Chloroflexota;c__UBA6077;o__UBA6077;f__CF-72;g__Unclassified;s__Unclassified	67.25	1097	3742874	1097	3742874	18415	3711	1952	0	4323	3472362	803	1.15	67.32	92.77	270512	66.41	7.23	33
MAG420	d__Bacteria;p__Pseudomonadota;c__Alphaproteobacteria;o__Sphingomonadales;f__Sphingomonadaceae;g__Sphingomicrobium;s__Unclassified	65.53	409	1637699	409	1637699	16253	4250	2457	0	1962	1517193	773	1.2	65.81	92.64	120506	62.03	7.36	33
MAG421	d__Bacteria;p__Bacteroidota;c__Bacteroidia;o__Sphingobacteriales;f__Sphingobacteriaceae;g__Sphingobacterium;s__Unclassified	45.99	843	2100974	843	2100974	14936	2839	1286	0	2327	1938915	833	1.11	46.73	92.29	162059	37.1	7.71	11
MAG422	d__Bacteria;p__Cyanobacteriota;c__Cyanobacteriia;o__Cyanobacteriales;f__Coleofasciculaceae;g__Unclassified;s__Unclassified	47.4	486	7589894	486	7589894	95433	22742	7555	0	6668	6318789	948	0.88	48.25	83.25	1271105	43.21	16.75	69
MAG423	d__Bacteria;p__Bacteroidota;c__Bacteroidia;o__Cytophagales;f__Cyclobacteriaceae;g__Chryseolinea;s__Unclassified	43.82	1972	4379591	1972	4379591	9426	2341	1418	0	5262	3921261	745	1.2	44.37	89.53	458330	39.16	10.47	20
MAG424	d__Bacteria;p__Bacillota;c__Bacilli;o__Staphylococcales;f__Salinicoccaceae;g__Salinicoccus;s__Unclassified	42.86	414	2631812	414	2631812	39337	8292	3137	0	2856	2362359	827	1.09	43.91	89.76	269453	33.68	10.24	14
MAG425	d__Bacteria;p__Pseudomonadota;c__Gammaproteobacteria;o__Pseudomonadales;f__Pseudomonadaceae;g__Thiopseudomonas;s__Thiopseudomonas sp012800475	49.22	302	1704963	302	1704963	23171	6918	3010	0	1793	1540536	859	1.05	49.72	90.36	164427	44.56	9.64	23
MAG426	d__Bacteria;p__Actinomycetota;c__Thermoleophilia;o__Solirubrobacterales;f__70-9;g__VAYN01;s__Unclassified	68.35	66	2680946	66	2680946	207029	64723	24078	0	2771	2489172	898	1.03	68.83	92.85	191774	62.14	7.15	47
MAG427	d__Bacteria;p__Actinomycetota;c__Thermoleophilia;o__Solirubrobacterales;f__Solirubrobacteraceae;g__Unclassified;s__Unclassified	73.87	1135	3571356	1135	3571356	17829	3399	1785	0	4658	3379689	726	1.3	73.99	94.63	191667	71.6	5.37	33
MAG428	d__Bacteria;p__Actinomycetota;c__Actinomycetia;o__Actinomycetales;f__Microbacteriaceae;g__Microbacterium;s__Unclassified	69.97	666	1626144	666	1626144	16177	2787	1286	0	2028	1530480	755	1.25	70.15	94.12	95664	67.23	5.88	17
MAG429	d__Bacteria;p__Pseudomonadota;c__Gammaproteobacteria;o__Burkholderiales;f__Burkholderiaceae_B;g__Variovorax;s__Unclassified	67.54	715	4006439	715	4006439	89717	10896	2094	0	4447	3665937	824	1.11	67.96	91.5	340502	63.04	8.5	35
MAG43	d__Bacteria;p__Chloroflexota;c__Limnocylindria;o__Limnocylindrales;f__CSP1-4;g__SPCO01;s__Unclassified	70.28	478	2770229	478	2770229	34767	7765	2797	0	2933	2553555	871	1.06	70.19	92.18	216674	71.36	7.82	46
MAG430	d__Bacteria;p__Gemmatimonadota;c__Gemmatimonadetes;o__Gemmatimonadales;f__Gemmatimonadaceae;g__Gemmatirosa;s__Unclassified	73.95	1586	3615250	1586	3615250	13157	2188	1601	0	3970	3263202	822	1.1	73.72	90.26	352048	76.07	9.74	51
MAG431	d__Bacteria;p__Pseudomonadota;c__Gammaproteobacteria;o__Pseudomonadales;f__Pseudomonadaceae;g__Thiopseudomonas;s__Thiopseudomonas sp012518175	49.56	569	2046440	569	2046440	32819	4880	1637	0	2294	1856691	809	1.12	50.05	90.73	189749	44.8	9.27	33
MAG432	d__Bacteria;p__Pseudomonadota;c__Alphaproteobacteria;o__Rhizobiales;f__Xanthobacteraceae;g__Bradyrhizobium;s__Unclassified	64.16	523	3877472	523	3877472	68982	10255	3393	0	3989	3396462	851	1.03	64.7	87.59	481010	60.39	12.41	33
MAG433	d__Bacteria;p__Bacillota;c__Bacilli;o__Bacillales;f__Planococcaceae;g__Sporosarcina;s__Unclassified	40.53	257	689626	257	689626	32373	3309	1273	0	751	627093	835	1.09	40.93	90.93	62533	36.45	9.07	2
MAG434	d__Bacteria;p__Bacillota;c__Bacilli;o__Lactobacillales;f__Enterococcaceae;g__Enterococcus_B;s__Enterococcus_B faecium	38.74	764	1543273	764	1543273	7304	2145	1203	0	2050	1344252	656	1.33	39.53	87.1	199021	33.45	12.9	19
MAG435	d__Bacteria;p__Bacteroidota;c__Bacteroidia;o__Bacteroidales;f__Dysgonomonadaceae;g__UBA2632;s__Unclassified	34.94	535	1527318	535	1527318	19749	3420	1360	0	1738	1296279	746	1.14	35.9	84.87	231039	29.57	15.13	28
MAG436	d__Archaea;p__Thermoproteota;c__Nitrososphaeria;o__Nitrososphaerales;f__Nitrososphaeraceae;g__Nitrosocosmicus;s__Nitrosocosmicus oleophilus	34.02	636	2722775	636	2722775	32387	5996	2056	0	3269	2012472	616	1.2	35.56	73.91	710303	29.66	26.09	30
MAG437	d__Bacteria;p__Patescibacteria;c__Microgenomatia;o__Levybacterales;f__UBA12049;g__PRDT01;s__Unclassified	40.57	440	693644	440	693644	6674	1549	1071	0	1008	622689	618	1.45	41.12	89.77	70955	35.75	10.23	23
MAG438	d__Bacteria;p__Cyanobacteriota;c__Cyanobacteriia;o__Leptolyngbyales;f__Leptolyngbyaceae;g__DSRU01;s__DSRU01 sp015296075	49.28	1152	4899798	1152	4899798	25955	4870	2370	0	4902	4100898	837	1	50.47	83.7	798900	43.21	16.3	31
MAG439	d__Bacteria;p__Nitrospirota;c__Nitrospiria;o__Nitrospirales;f__Nitrospiraceae;g__Nitrospira_C;s__Unclassified	56.97	624	3064104	624	3064104	27054	6090	2556	0	3584	2713893	757	1.17	57.27	88.57	350211	54.63	11.43	32
MAG44	d__Bacteria;p__Acidobacteriota;c__Terriglobia;o__Bryobacterales;f__Bryobacteraceae;g__TMP-7;s__Unclassified	61.74	1424	4982903	1424	4982903	60695	4646	1640	0	5391	4715061	875	1.08	62.09	94.62	267842	55.6	5.38	32
MAG440	d__Bacteria;p__Actinomycetota;c__Actinomycetia;o__Actinomycetales;f__Microbacteriaceae;g__Leucobacter;s__Unclassified	62	365	1510175	365	1510175	29186	5123	2019	0	1663	1383789	832	1.1	62.37	91.63	126386	58.01	8.37	22
MAG441	d__Bacteria;p__Cyanobacteriota;c__Cyanobacteriia;o__Cyanobacteriales;f__Coleofasciculaceae;g__Allocoleopsis;s__Unclassified	46.12	1820	4764882	1820	4764882	10086	2819	1615	0	5492	3886407	708	1.15	47.09	81.56	878475	41.85	18.44	54
MAG442	d__Bacteria;p__Bacillota;c__Bacilli;o__Lactobacillales;f__Lactobacillaceae;g__Lactobacillus;s__Lactobacillus amylovorus	38.35	381	1423065	381	1423065	22993	4810	1663	0	1644	1286010	782	1.16	39.18	90.37	137055	30.52	9.63	37
MAG443	d__Bacteria;p__Bacteroidota;c__Bacteroidia;o__Chitinophagales;f__Chitinophagaceae;g__Unclassified;s__Unclassified	52.24	809	2608228	809	2608228	17367	3958	1596	0	2881	2309721	802	1.1	53.24	88.56	298507	44.56	11.44	30
MAG444	d__Bacteria;p__Bacteroidota;c__Bacteroidia;o__Chitinophagales;f__Chitinophagaceae;g__Unclassified;s__Unclassified	41.25	1972	2964059	1972	2964059	6951	1478	1072	0	3999	2686482	672	1.35	41.56	90.64	277577	38.29	9.36	25
MAG445	d__Bacteria;p__Actinomycetota;c__Thermoleophilia;o__Solirubrobacterales;f__70-9;g__RHKX01;s__Unclassified	70.83	528	1619924	528	1619924	11741	3282	1810	0	2009	1521033	757	1.24	70.92	93.9	98891	69.36	6.1	18
MAG446	d__Bacteria;p__Bacteroidota;c__Bacteroidia;o__Bacteroidales;f__Dysgonomonadaceae;g__Fermentimonas;s__Fermentimonas sp015478775	36.05	468	1929777	468	1929777	15928	4664	2237	0	1919	1776315	926	0.99	36.91	92.05	153462	26.11	7.95	17
MAG447	d__Bacteria;p__Pseudomonadota;c__Gammaproteobacteria;o__Enterobacterales_A;f__Aeromonadaceae;g__Oceanisphaera;s__Oceanisphaera sp012518835	47.94	330	1992450	330	1992450	24604	7740	2971	0	2021	1796748	889	1.01	48.59	90.18	195702	41.99	9.82	33
MAG448	d__Bacteria;p__Bacteroidota;c__Bacteroidia;o__Flavobacteriales;f__Weeksellaceae;g__Planobacterium;s__Unclassified	41.55	591	1224164	591	1224164	10251	2207	1221	0	1541	1116876	725	1.26	42.29	91.24	107288	33.87	8.76	14
MAG449	d__Bacteria;p__Actinomycetota;c__Actinomycetia;o__Mycobacteriales;f__Mycobacteriaceae;g__Corynebacterium;s__Corynebacterium faecigallinarum	67.14	107	2759836	107	2759836	186398	59425	12241	0	2592	2501454	965	0.94	67.67	90.64	258382	62.05	9.36	42
MAG45	d__Bacteria;p__Actinomycetota;c__Actinomycetia;o__Mycobacteriales;f__Mycobacteriaceae;g__Mycobacterium;s__Mycobacterium sp023460175	69.19	883	2869123	883	2869123	17446	3603	1829	0	3337	2649102	794	1.16	69.55	92.33	220021	64.8	7.67	23
MAG450	d__Bacteria;p__Actinomycetota;c__Thermoleophilia;o__Solirubrobacterales;f__70-9;g__JAJKHV01;s__Unclassified	67.39	462	1742080	462	1742080	15901	4461	2067	0	2109	1597122	757	1.21	67.79	91.68	144958	62.95	8.32	36
MAG451	d__Bacteria;p__Gemmatimonadota;c__Gemmatimonadetes;o__Gemmatimonadales;f__Gemmatimonadaceae;g__JABFXC01;s__Unclassified	69.85	401	2998033	401	2998033	55637	11699	3193	0	2995	2781438	929	1	70.12	92.78	216595	66.37	7.22	40
MAG452	d__Bacteria;p__Actinomycetota;c__Actinomycetia;o__Actinomycetales;f__Dermabacteraceae;g__Brachybacterium;s__Brachybacterium rhamnosum	73.36	610	2086627	610	2086627	11210	3832	1948	0	2347	1918155	817	1.12	73.29	91.93	168472	74.15	8.07	32
MAG453	d__Bacteria;p__Bacteroidota;c__Bacteroidia;o__Chitinophagales;f__Chitinophagaceae;g__VBAS01;s__Unclassified	38.97	2021	2891107	2021	2891107	5453	1404	1062	0	3998	2637111	660	1.38	39.42	91.21	253996	34.29	8.79	12
MAG454	d__Bacteria;p__Acidobacteriota;c__Blastocatellia;o__Pyrinomonadales;f__Pyrinomonadaceae;g__Unclassified;s__Unclassified	47.62	1543	3386009	1543	3386009	11735	2456	1249	0	4140	3054741	738	1.22	48.94	90.22	331268	35.49	9.78	51
MAG455	d__Bacteria;p__Pseudomonadota;c__Alphaproteobacteria;o__Sphingomonadales;f__Sphingomonadaceae;g__Allosphingosinicella;s__Unclassified	68.54	555	1806900	555	1806900	32724	3645	1853	0	2275	1674360	736	1.26	68.85	92.66	132540	64.7	7.34	34
MAG456	d__Bacteria;p__Actinomycetota;c__Thermoleophilia;o__Gaiellales;f__Gaiellaceae;g__PALSA-600;s__Unclassified	70.17	251	2937294	251	2937294	107755	17615	5418	0	3268	2787570	853	1.11	70.34	94.9	149724	67.02	5.1	46
MAG457	d__Bacteria;p__Actinomycetota;c__Thermoleophilia;o__Gaiellales;f__Gaiellaceae;g__Gaiella;s__Unclassified	71.07	1097	2609878	1097	2609878	19195	2714	1286	0	3551	2445795	689	1.36	71.18	93.71	164083	69.43	6.29	23
MAG458	d__Bacteria;p__Bacteroidota;c__Rhodothermia;o__Rhodothermales;f__Rubricoccaceae;g__Unclassified;s__Unclassified	72.73	732	2063619	732	2063619	15337	3002	1717	0	2404	1892637	787	1.16	72.81	91.71	170982	71.81	8.29	33
MAG459	d__Bacteria;p__Pseudomonadota;c__Gammaproteobacteria;o__Pseudomonadales;f__Moraxellaceae;g__Acinetobacter;s__Acinetobacter pseudolwoffii	43.99	536	2349053	536	2349053	19122	6059	2085	0	2584	2029209	785	1.1	45.57	86.38	319844	34	13.62	37
MAG46	d__Bacteria;p__Acidobacteriota;c__Blastocatellia;o__Pyrinomonadales;f__Pyrinomonadaceae;g__UBA11740;s__Unclassified	56.48	206	4540741	206	4540741	140738	36048	12001	0	3966	4062840	1024	0.87	56.9	89.48	477901	52.89	10.52	60
MAG460	d__Bacteria;p__Actinomycetota;c__Actinomycetia;o__Propionibacteriales;f__Propionibacteriaceae;g__Arachnia;s__Unclassified	65.38	424	2347902	424	2347902	36312	7494	2607	0	2478	2165967	874	1.06	65.67	92.25	181935	61.95	7.75	28
MAG461	d__Bacteria;p__Actinomycetota;c__Actinomycetia;o__Streptomycetales;f__Catenulisporaceae;g__Actinocrinis;s__Unclassified	69.2	1420	5762661	1420	5762661	21475	4444	2410	0	6082	5044224	829	1.06	69.69	87.53	718437	65.79	12.47	37
MAG462	d__Bacteria;p__Pseudomonadota;c__Gammaproteobacteria;o__Pseudomonadales;f__Moraxellaceae;g__Acinetobacter;s__Acinetobacter pseudolwoffii	44.38	607	1575918	607	1575918	17510	2914	1373	0	1895	1381575	729	1.2	45.75	87.67	194343	34.62	12.33	18
MAG463	d__Bacteria;p__Actinomycetota;c__Thermoleophilia;o__Solirubrobacterales;f__70-9;g__RHKX01;s__Unclassified	71.04	456	2493853	456	2493853	28271	7648	2560	0	2833	2337708	825	1.14	71.16	93.74	156145	69.37	6.26	32
MAG464	d__Bacteria;p__Pseudomonadota;c__Alphaproteobacteria;o__Sphingomonadales;f__Sphingomonadaceae;g__Allosphingosinicella;s__Unclassified	67.32	582	2690669	582	2690669	28534	5646	2368	0	3151	2480811	787	1.17	67.7	92.2	209858	62.89	7.8	38
MAG465	d__Archaea;p__Thermoproteota;c__Nitrososphaeria;o__Nitrososphaerales;f__Nitrososphaeraceae;g__TH1177;s__Unclassified	29.58	825	1375133	825	1375133	6401	1695	1109	0	1891	1105956	585	1.38	31.04	80.43	269177	23.58	19.57	12
MAG466	d__Bacteria;p__Chloroflexota;c__Limnocylindria;o__Limnocylindrales;f__CSP1-4;g__SPCO01;s__Unclassified	72.23	478	2241867	478	2241867	19739	5393	2692	0	2535	2085666	823	1.13	72.13	93.03	156201	73.56	6.97	32
MAG467	d__Bacteria;p__Pseudomonadota;c__Gammaproteobacteria;o__Pseudomonadales;f__Pseudomonadaceae;g__Pseudomonas_E;s__Pseudomonas_E helleri	58.45	1548	2435209	1548	2435209	5239	1581	1097	0	3392	2148984	634	1.39	59.24	88.25	286225	52.54	11.75	23
MAG468	d__Bacteria;p__Acidobacteriota;c__Blastocatellia;o__Pyrinomonadales;f__Pyrinomonadaceae;g__OLB17;s__Unclassified	53.82	1216	2044294	1216	2044294	6033	1708	1115	0	2697	1843872	684	1.32	54.45	90.2	200422	48.03	9.8	18
MAG469	d__Bacteria;p__Bacteroidota;c__Bacteroidia;o__Chitinophagales;f__Chitinophagaceae;g__JADCRZ01;s__Unclassified	46.65	1066	3252891	1066	3252891	10637	3246	1921	0	3452	2928243	848	1.06	47.31	90.02	324648	40.77	9.98	15
MAG47	d__Bacteria;p__Bacillota;c__Bacilli;o__Lactobacillales;f__Enterococcaceae;g__Enterococcus_I;s__Enterococcus_I aquimarinus	39.23	192	1903826	192	1903826	64078	16140	4114	0	1887	1691271	896	0.99	39.93	88.84	212555	33.7	11.16	21
MAG470	d__Archaea;p__Thermoproteota;c__Nitrososphaeria;o__Nitrososphaerales;f__Nitrosopumilaceae;g__Nitrosotenuis;s__Unclassified	47.58	64	1468114	64	1468114	202350	42110	12106	0	1803	1356759	753	1.23	48.37	92.42	111355	37.99	7.58	32
MAG471	d__Bacteria;p__Cyanobacteriota;c__Cyanobacteriia;o__Gloeomargaritales;f__Unclassified;g__Unclassified;s__Unclassified	28.83	19	109573	19	109573	16944	9338	3667	0	143	92139	644	1.31	30.03	84.09	17434	22.46	15.91	30
MAG472	d__Bacteria;p__Actinomycetota;c__Actinomycetia;o__Actinomycetales;f__Dermabacteraceae;g__Brachybacterium;s__Brachybacterium sp012799425	71.11	590	2940928	590	2940928	38813	7486	2335	0	3016	2694990	894	1.03	71.11	91.64	245938	71.03	8.36	40
MAG473	d__Bacteria;p__Cyanobacteriota;c__Cyanobacteriia;o__Cyanobacteriales;f__Nostocaceae;g__Scytonema;s__Unclassified	42.92	3046	6189419	3046	6189419	9212	2119	1338	0	8108	5070228	625	1.31	43.63	81.92	1119191	39.7	18.08	24
MAG474	d__Bacteria;p__Pseudomonadota;c__Alphaproteobacteria;o__Rhizobiales;f__Rhizobiaceae;g__Paenochrobactrum;s__Unclassified	45.87	534	2375479	534	2375479	19668	5125	2393	0	2598	2081514	801	1.09	46.89	87.63	293965	38.65	12.37	28
MAG475	d__Archaea;p__Thermoproteota;c__Nitrososphaeria;o__Nitrososphaerales;f__Nitrososphaeraceae;g__Nitrosocosmicus;s__Nitrosocosmicus oleophilus	34.57	684	1518325	684	1518325	12294	2162	1583	0	2085	1227945	589	1.37	35.78	80.87	290380	29.47	19.13	20
MAG476	d__Bacteria;p__Actinomycetota;c__Actinomycetia;o__Actinomycetales;f__Dermatophilaceae;g__Ornithinicoccus;s__Ornithinicoccus ciconiae	69.06	1029	3824539	1029	3824539	17776	4171	1957	0	4300	3480222	809	1.12	69.3	91	344317	66.67	9	44
MAG477	d__Bacteria;p__Actinomycetota;c__Acidimicrobiia;o__Acidimicrobiales;f__AC-14;g__CADCTB01;s__Unclassified	70.7	657	3457184	657	3457184	18519	5738	3247	0	4184	3115968	745	1.21	70.97	90.13	341216	68.27	9.87	41
MAG478	d__Bacteria;p__Chloroflexota;c__UBA6077;o__UBA6077;f__CF-72;g__Unclassified;s__Unclassified	64.38	295	5172398	295	5172398	102603	29970	8207	0	5017	4836570	964	0.97	64.39	93.51	335828	64.36	6.49	32
MAG479	d__Bacteria;p__Actinomycetota;c__Actinomycetia;o__Actinomycetales;f__JAJYRW01;g__JAJYRW01;s__Unclassified	60.4	491	1844344	491	1844344	26731	5146	1794	0	2148	1706565	794	1.16	60.81	92.53	137779	55.32	7.47	31
MAG48	d__Bacteria;p__Actinomycetota;c__Actinomycetia;o__Actinomycetales;f__Dermabacteraceae;g__Brachybacterium;s__Unclassified	70.68	659	3986409	659	3986409	83363	8431	2585	0	4027	3631032	902	1.01	70.69	91.09	355377	70.5	8.91	38
MAG480	d__Bacteria;p__Patescibacteria;c__Saccharimonadia;o__Saccharimonadales;f__Nanosynbacteraceae;g__Nanosynbacter;s__Unclassified	45.08	158	877910	158	877910	21265	7363	2695	0	978	799566	818	1.11	45.58	91.08	78344	39.89	8.92	45
MAG481	d__Bacteria;p__Bacteroidota;c__Bacteroidia;o__Cytophagales;f__Spirosomaceae;g__Spirosoma;s__Unclassified	56.23	1582	2774094	1582	2774094	7649	1823	1153	0	3672	2450796	667	1.32	57.32	88.35	323298	47.97	11.65	28
MAG482	d__Bacteria;p__Acidobacteriota;c__Blastocatellia;o__Pyrinomonadales;f__Pyrinomonadaceae;g__QHXN01;s__Unclassified	60.59	1184	3485070	1184	3485070	17901	3781	1442	0	3754	3081570	821	1.08	61.71	88.42	403500	52.09	11.58	26
MAG483	d__Bacteria;p__Actinomycetota;c__Actinomycetia;o__Actinomycetales;f__Microbacteriaceae;g__Agrococcus;s__Unclassified	60.96	414	2425338	414	2425338	37476	6971	3006	0	2583	2213787	857	1.07	61.22	91.28	211551	58.27	8.72	32
MAG484	d__Bacteria;p__Pseudomonadota;c__Gammaproteobacteria;o__Cardiobacteriales;f__Wohlfahrtiimonadaceae;g__Ignatzschineria;s__Unclassified	40.81	149	1781937	149	1781937	78669	25214	5411	0	1681	1521975	905	0.94	42.16	85.41	259962	32.87	14.59	42
MAG485	d__Bacteria;p__Acidobacteriota;c__Blastocatellia;o__Pyrinomonadales;f__Pyrinomonadaceae;g__PSRF01;s__Unclassified	54.53	2296	6905900	2296	6905900	14505	3790	1474	0	7432	6356007	855	1.08	54.97	92.04	549893	49.49	7.96	62
MAG486	d__Bacteria;p__Actinomycetota;c__Thermoleophilia;o__Solirubrobacterales;f__70-9;g__VAYN01;s__Unclassified	69.04	16	2602467	16	2602467	422777	186466	115388	0	2595	2436837	939	1	69.44	93.64	165630	63.12	6.36	47
MAG487	d__Bacteria;p__Dormibacterota;c__Dormibacteria;o__Dormibacterales;f__Dormibacteraceae;g__Unclassified;s__Unclassified	67.16	265	2305584	265	2305584	36773	12466	4031	0	2530	2151348	850	1.1	67.34	93.31	154236	64.64	6.69	27
MAG488	d__Bacteria;p__Gemmatimonadota;c__Gemmatimonadetes;o__Gemmatimonadales;f__Gemmatimonadaceae;g__JABFXC01;s__Unclassified	67.31	459	3541086	459	3541086	41373	11085	3365	0	3457	3278520	948	0.98	67.5	92.59	262566	64.98	7.41	40
MAG489	d__Bacteria;p__Bacteroidota;c__Bacteroidia;o__Sphingobacteriales;f__Sphingobacteriaceae;g__Unclassified;s__Unclassified	36.96	331	2928525	331	2928525	72580	14769	3880	0	2756	2621985	951	0.94	37.75	89.53	306540	30.25	10.47	29
MAG49	d__Bacteria;p__Pseudomonadota;c__Gammaproteobacteria;o__Steroidobacterales;f__Steroidobacteraceae;g__SCUD01;s__Unclassified	70.25	335	2651918	335	2651918	63411	11518	3511	0	2734	2529717	925	1.03	70.49	95.39	122201	65.39	4.61	30
MAG490	d__Bacteria;p__Pseudomonadota;c__Alphaproteobacteria;o__Sphingomonadales;f__Sphingomonadaceae;g__Allosphingosinicella;s__Unclassified	68.89	857	2825457	857	2825457	16590	3724	1886	0	3436	2588547	753	1.22	69.21	91.62	236910	65.37	8.38	39
MAG491	d__Bacteria;p__Bacteroidota;c__Bacteroidia;o__Cytophagales;f__Cyclobacteriaceae;g__Unclassified;s__Unclassified	45.79	738	4208832	738	4208832	82877	9801	2269	0	4097	3776727	922	0.97	46.62	89.73	432105	38.53	10.27	36
MAG492	d__Bacteria;p__Acidobacteriota;c__Thermoanaerobaculia;o__Gp7-AA8;f__Gp7-AA8;g__JAENWF01;s__Unclassified	62.66	414	4014167	414	4014167	59440	14559	4504	0	4046	3795924	938	1.01	62.83	94.56	218243	59.72	5.44	43
MAG493	d__Bacteria;p__Acidobacteriota;c__Thermoanaerobaculia;o__UBA5704;f__UBA5704;g__Unclassified;s__Unclassified	67.31	1578	4391108	1578	4391108	11531	2905	1751	0	5051	4028514	798	1.15	67.78	91.74	362594	62.13	8.26	31
MAG494	d__Bacteria;p__Actinomycetota;c__Actinomycetia;o__Actinomycetales;f__Dermatophilaceae;g__Phycicoccus;s__Phycicoccus jejuensis	73.93	506	2771868	506	2771868	34449	6241	3145	0	2926	2569584	878	1.06	73.93	92.7	202284	73.94	7.3	34
MAG495	d__Bacteria;p__Bacteroidota;c__Bacteroidia;o__Chitinophagales;f__Chitinophagaceae;g__JAEWAC01;s__Unclassified	48.16	2250	4067713	2250	4067713	10548	1846	1119	0	5252	3538260	674	1.29	49.26	86.98	529453	40.78	13.02	37
MAG496	d__Bacteria;p__Patescibacteria;c__Saccharimonadia;o__Saccharimonadales;f__UBA1020;g__UBA1020;s__Unclassified	55.89	28	852690	28	852690	92773	65971	23376	0	927	775428	836	1.09	56.79	90.94	77262	46.86	9.06	37
MAG497	d__Bacteria;p__Actinomycetota;c__Actinomycetia;o__Mycobacteriales;f__Jatrophihabitantaceae;g__Jatrophihabitans;s__Unclassified	70.61	358	2952335	358	2952335	41058	11766	3949	0	3140	2784798	887	1.06	70.8	94.33	167537	67.31	5.67	24
MAG498	d__Bacteria;p__Bacillota;c__Bacilli;o__Lactobacillales;f__Lactobacillaceae;g__Limosilactobacillus;s__Limosilactobacillus faecipullorum	42.92	194	1830705	194	1830705	75615	13012	4242	0	1857	1580805	851	1.01	43.95	86.35	249900	36.41	13.65	34
MAG499	d__Bacteria;p__Pseudomonadota;c__Alphaproteobacteria;o__Caulobacterales;f__Caulobacteraceae;g__Phenylobacterium;s__Unclassified	70.45	752	2364924	752	2364924	14218	3357	1946	0	2955	2137482	723	1.25	70.7	90.38	227442	68.04	9.62	29
MAG5	d__Bacteria;p__Bacillota;c__Bacilli;o__Staphylococcales;f__Staphylococcaceae;g__Mammaliicoccus;s__Mammaliicoccus lentus	31.75	231	2244763	231	2244763	71834	15287	4545	0	2316	2001816	864	1.03	32.28	89.18	242947	27.33	10.82	32
MAG50	d__Bacteria;p__Gemmatimonadota;c__Gemmatimonadetes;o__Longimicrobiales;f__Longimicrobiaceae;g__Longimicrobium;s__Unclassified	71.63	753	6436266	753	6436266	63416	13298	3971	0	5851	5367000	917	0.91	72.31	83.39	1069266	68.24	16.61	70
MAG500	d__Bacteria;p__Pseudomonadota;c__Gammaproteobacteria;o__Pseudomonadales;f__Cellvibrionaceae;g__Gilvimarinus;s__Unclassified	53.54	123	2955855	123	2955855	155868	38509	14375	0	2648	2606841	984	0.9	54.23	88.19	349014	48.4	11.81	34
MAG501	d__Bacteria;p__Bacteroidota;c__Bacteroidia;o__Sphingobacteriales;f__Sphingobacteriaceae;g__Unclassified;s__Unclassified	36.37	495	3207032	495	3207032	69694	10162	2798	0	3115	2848923	915	0.97	37.13	88.83	358109	30.37	11.17	26
MAG502	d__Bacteria;p__Actinomycetota;c__Actinomycetia;o__Streptosporangiales;f__Streptosporangiaceae;g__Nocardiopsis;s__Nocardiopsis listeri_A	69.39	496	5268807	496	5268807	85033	16819	4789	0	4908	4616835	941	0.93	69.81	87.63	651972	66.42	12.37	52
MAG503	d__Bacteria;p__Pseudomonadota;c__Gammaproteobacteria;o__Burkholderiales;f__Casimicrobiaceae;g__Unclassified;s__Unclassified	70.25	475	4102318	475	4102318	42062	10795	4644	0	4049	3678882	909	0.99	70.12	89.68	423436	71.36	10.32	34
MAG504	d__Bacteria;p__Patescibacteria;c__Microgenomatia;o__Levybacterales;f__UBA12049;g__PRDT01;s__Unclassified	41.46	617	1302886	617	1302886	8335	2330	1200	0	1801	1144653	636	1.38	41.98	87.86	158233	37.67	12.14	59
MAG505	d__Bacteria;p__Bacteroidota;c__Bacteroidia;o__Sphingobacteriales;f__Sphingobacteriaceae;g__Sphingobacterium;s__Sphingobacterium sp012030425	36.24	163	5812914	163	5812914	535297	92041	16746	0	4987	5106159	1024	0.86	37.3	87.84	706755	28.56	12.16	61
MAG506	d__Bacteria;p__Actinomycetota;c__Actinomycetia;o__Actinomycetales;f__Micrococcaceae;g__Arthrobacter;s__Unclassified	64.9	861	2432176	861	2432176	31165	3221	1514	0	2993	2177862	728	1.23	65.36	89.54	254314	61	10.46	32
MAG507	d__Bacteria;p__Pseudomonadota;c__Gammaproteobacteria;o__Enterobacterales;f__Enterobacteriaceae;g__Escherichia;s__Escherichia coli	51.02	1478	3367474	1478	3367474	11612	2543	1301	0	4280	3014358	704	1.27	52	89.51	353116	42.65	10.49	25
MAG508	d__Bacteria;p__Actinomycetota;c__Actinomycetia;o__Mycobacteriales;f__Mycobacteriaceae;g__Corynebacterium;s__Unclassified	65.46	222	2725497	222	2725497	143319	23889	5329	0	2590	2403282	928	0.95	66.15	88.18	322215	60.31	11.82	54
MAG509	d__Bacteria;p__Actinomycetota;c__Actinomycetia;o__JAJZTN01;f__JAJZTN01;g__Unclassified;s__Unclassified	71.54	629	3089641	629	3089641	38545	5945	2387	0	3353	2824347	842	1.09	71.69	91.41	265294	69.94	8.59	39
MAG51	d__Bacteria;p__Patescibacteria;c__Paceibacteria;o__UBA9983_A;f__UBA2103;g__C7867-001;s__Unclassified	57.06	23	770296	23	770296	356672	258765	31323	0	836	685791	820	1.09	57.9	89.03	84505	50.27	10.97	42
MAG510	d__Bacteria;p__Pseudomonadota;c__Alphaproteobacteria;o__Rhizobiales;f__Xanthobacteraceae;g__Bradyrhizobium;s__Unclassified	62.86	882	3442517	882	3442517	23755	4377	2220	0	4131	2969268	719	1.2	63.34	86.25	473249	59.85	13.75	45
MAG511	d__Bacteria;p__Actinomycetota;c__Actinomycetia;o__Propionibacteriales;f__Propionibacteriaceae;g__Arachnia;s__Arachnia sp012837465	68.84	436	2701278	436	2701278	49729	8479	2825	0	2740	2511678	917	1.01	69.12	92.98	189600	65.09	7.02	35
MAG512	d__Bacteria;p__Myxococcota;c__Myxococcia;o__Myxococcales;f__40CM-4-68-19;g__Unclassified;s__Unclassified	72.18	702	1780989	702	1780989	10985	2614	1661	0	2167	1667481	769	1.22	72.18	93.63	113508	72.14	6.37	21
MAG513	d__Bacteria;p__Bacteroidota;c__Bacteroidia;o__Chitinophagales;f__Chitinophagaceae;g__Flavisolibacter;s__Unclassified	40.68	657	4111204	657	4111204	34551	8160	3112	0	3927	3603813	918	0.96	41.4	87.66	507391	35.58	12.34	34
MAG514	d__Bacteria;p__Bacteroidota;c__Bacteroidia;o__Flavobacteriales;f__Weeksellaceae;g__Moheibacter;s__Unclassified	35.63	51	2959821	51	2959821	193007	120256	45361	0	2820	2691861	955	0.95	36.33	90.95	267960	28.64	9.05	37
MAG515	d__Bacteria;p__Pseudomonadota;c__Gammaproteobacteria;o__Steroidobacterales;f__Steroidobacteraceae;g__SCUD01;s__Unclassified	70.31	690	2098700	690	2098700	14842	3268	1755	0	2596	1999014	770	1.24	70.46	95.25	99686	67.38	4.75	23
MAG516	d__Bacteria;p__Pseudomonadota;c__Gammaproteobacteria;o__Diplorickettsiales;f__Diplorickettsiaceae;g__Aquirickettsiella;s__Unclassified	37.91	444	1468284	444	1468284	19046	4113	1585	0	1677	1323561	789	1.14	38.49	90.14	144723	32.6	9.86	46
MAG517	d__Bacteria;p__Bacillota;c__Bacilli;o__Lactobacillales;f__Aerococcaceae;g__Fundicoccus;s__Unclassified	39.13	199	2380225	199	2380225	70772	23127	4746	0	2201	2030133	922	0.92	39.72	85.29	350092	35.71	14.71	7
MAG518	d__Archaea;p__Thermoproteota;c__Nitrososphaeria;o__Nitrososphaerales;f__Nitrososphaeraceae;g__Nitrosocosmicus;s__Nitrosocosmicus oleophilus	34.36	1202	2249529	1202	2249529	8817	1930	1148	0	3054	1719198	563	1.36	35.66	76.42	530331	30.14	23.58	22
MAG519	d__Bacteria;p__Pseudomonadota;c__Gammaproteobacteria;o__Burkholderiales;f__Burkholderiaceae;g__Noviherbaspirillum_B;s__Unclassified	60	143	5584878	143	5584878	203374	70841	19100	0	4986	4893237	981	0.89	61.21	87.62	691641	51.48	12.38	40
MAG52	d__Bacteria;p__Bacteroidota;c__Bacteroidia;o__Cytophagales;f__Cyclobacteriaceae;g__Chryseolinea;s__Unclassified	43.99	1852	2869089	1852	2869089	6122	1544	1083	0	3821	2583213	676	1.33	44.51	90.04	285876	39.29	9.96	10
MAG520	d__Bacteria;p__Acidobacteriota;c__Thermoanaerobaculia;o__UBA5704;f__UBA5704;g__UBA5704;s__Unclassified	68.18	408	7585643	408	7585643	124858	29919	8609	0	6091	7025430	1153	0.8	68.69	92.61	560213	61.74	7.39	42
MAG521	d__Bacteria;p__Acidobacteriota;c__Terriglobia;o__Terriglobales;f__Gp1-AA117;g__Angelobacter;s__Unclassified	56.56	75	4881675	75	4881675	315404	114760	33329	0	4408	4260699	967	0.9	57.15	87.28	620976	52.5	12.72	45
MAG522	d__Bacteria;p__Gemmatimonadota;c__Gemmatimonadetes;o__Gemmatimonadales;f__Gemmatimonadaceae;g__JABFXC01;s__Unclassified	69.07	740	2281656	740	2281656	14409	3352	1792	0	2580	2101302	814	1.13	69.32	92.1	180354	66.19	7.9	15
MAG523	d__Bacteria;p__Actinomycetota;c__Actinomycetia;o__Actinomycetales;f__Cellulomonadaceae;g__Timonella;s__Unclassified	56.33	356	1866829	356	1866829	31036	6388	2719	0	1929	1665561	863	1.03	56.92	89.22	201268	51.48	10.78	27
MAG524	d__Bacteria;p__Acidobacteriota;c__Blastocatellia;o__Pyrinomonadales;f__Pyrinomonadaceae;g__PSRF01;s__Unclassified	55.31	1696	2778624	1696	2778624	6646	1657	1098	0	3611	2600382	720	1.3	55.75	93.59	178242	48.88	6.41	15
MAG525	d__Bacteria;p__Actinomycetota;c__Thermoleophilia;o__Solirubrobacterales;f__70-9;g__VRUE01;s__Unclassified	69.4	91	2216385	91	2216385	120793	40073	14559	0	2273	2057307	905	1.03	69.83	92.82	159078	63.82	7.18	48
MAG526	d__Bacteria;p__Pseudomonadota;c__Gammaproteobacteria;o__Burkholderiales;f__SG8-39;g__SCGC-AG-212-J23;s__Unclassified	66.99	738	3997857	738	3997857	37213	8375	2393	0	4858	3839181	790	1.22	67.23	96.03	158676	61.15	3.97	28
MAG527	d__Bacteria;p__Actinomycetota;c__Thermoleophilia;o__Solirubrobacterales;f__70-9;g__Unclassified;s__Unclassified	70.23	161	2407428	161	2407428	82723	22549	6803	0	2500	2257869	903	1.04	70.47	93.79	149559	66.65	6.21	43
MAG528	d__Bacteria;p__Nitrospirota;c__Nitrospiria;o__Nitrospirales;f__Nitrospiraceae;g__Palsa-1315;s__Unclassified	55.79	1689	2304429	1689	2304429	3994	1317	1043	0	3620	1943658	537	1.57	56.22	84.34	360771	53.43	15.66	46
MAG529	d__Bacteria;p__Bacteroidota;c__Bacteroidia;o__Chitinophagales;f__Saprospiraceae;g__M3007;s__Unclassified	59.74	1901	3263013	1901	3263013	9493	1751	1125	0	3846	2819595	733	1.18	61.81	86.41	443418	46.58	13.59	14
MAG53	d__Bacteria;p__Pseudomonadota;c__Gammaproteobacteria;o__Burkholderiales;f__Burkholderiaceae_A;g__Unclassified;s__Unclassified	68.86	838	1957337	838	1957337	8548	2286	1610	0	2481	1819458	733	1.27	68.94	92.96	137879	67.85	7.04	22
MAG530	d__Bacteria;p__Actinomycetota;c__Actinomycetia;o__Actinomycetales;f__Micrococcaceae;g__Kocuria;s__Kocuria carniphila	63.97	431	2275529	431	2275529	41910	9306	2259	0	2339	2040327	872	1.03	64.4	89.66	235202	60.28	10.34	32
MAG531	d__Bacteria;p__Actinomycetota;c__Actinomycetia;o__Mycobacteriales;f__Mycobacteriaceae;g__Gordonia;s__Gordonia sp012515855	67.81	342	3923221	342	3923221	95579	24765	4989	0	3861	3609213	935	0.98	68.2	92	314008	63.25	8	53
MAG532	d__Bacteria;p__Actinomycetota;c__Thermoleophilia;o__Solirubrobacterales;f__Solirubrobacteraceae;g__Baekduia;s__Unclassified	72.68	611	4225026	611	4225026	37196	8829	3588	0	4668	3947553	846	1.1	72.9	93.43	277473	69.5	6.57	44
MAG533	d__Bacteria;p__Acidobacteriota;c__Thermoanaerobaculia;o__UBA5704;f__UBA5704;g__UBA5704;s__Unclassified	68.65	2425	4844838	2425	4844838	7487	2166	1206	0	5690	4480749	787	1.17	69.09	92.49	364089	63.27	7.51	36
MAG534	d__Bacteria;p__Acidobacteriota;c__HRBIN11;o__JAKEFK01;f__JAKEFK01;g__Unclassified;s__Unclassified	51.06	1678	3088933	1678	3088933	7778	1928	1151	0	3952	2870901	726	1.28	51.25	92.94	218032	48.62	7.06	28
MAG535	d__Bacteria;p__Pseudomonadota;c__Alphaproteobacteria;o__Sphingomonadales;f__Sphingomonadaceae;g__Allosphingosinicella;s__Unclassified	67.87	70	3580911	70	3580911	324045	82686	36951	0	3494	3208413	918	0.98	68.37	89.6	372498	63.56	10.4	46
MAG536	d__Bacteria;p__Pseudomonadota;c__Gammaproteobacteria;o__Pseudomonadales;f__Moraxellaceae;g__Acinetobacter;s__Acinetobacter pseudolwoffii	43.66	856	1946430	856	1946430	16112	2543	1245	0	2357	1680603	713	1.21	45.15	86.34	265827	34.23	13.66	19
MAG537	d__Bacteria;p__Actinomycetota;c__Actinomycetia;o__Actinomycetales;f__Micrococcaceae;g__Glutamicibacter;s__Glutamicibacter arilaitensis	59.65	426	2429875	426	2429875	35234	7231	2888	0	2578	2175015	844	1.06	60.47	89.51	254860	52.7	10.49	46
MAG538	d__Bacteria;p__Pseudomonadota;c__Gammaproteobacteria;o__Xanthomonadales;f__Xanthomonadaceae;g__Pseudoxanthomonas_A;s__Unclassified	68.22	682	1663715	682	1663715	9388	2428	1660	0	2086	1519539	728	1.25	68.35	91.33	144176	66.85	8.67	17
MAG539	d__Bacteria;p__Actinomycetota;c__Actinomycetia;o__Actinomycetales;f__Micrococcaceae;g__Arthrobacter_D;s__Arthrobacter_D subterraneus	65.35	481	2286103	481	2286103	63763	5990	2116	0	2432	2091693	860	1.06	65.73	91.5	194410	61.18	8.5	30
MAG54	d__Bacteria;p__Actinomycetota;c__Thermoleophilia;o__Gaiellales;f__Gaiellaceae;g__JACCRW01;s__Unclassified	71.87	372	2483665	372	2483665	47005	9764	2928	0	2874	2355519	820	1.16	72.08	94.84	128146	68.03	5.16	44
MAG540	d__Bacteria;p__Actinomycetota;c__Actinomycetia;o__Actinomycetales;f__Micrococcaceae;g__Arthrobacter_H;s__Arthrobacter_H sp016892645	68.89	757	2565739	757	2565739	27291	3738	1839	0	2964	2349879	793	1.16	69.12	91.59	215860	66.45	8.41	31
MAG541	d__Bacteria;p__Pseudomonadota;c__Alphaproteobacteria;o__Rhodobacterales;f__Rhodobacteraceae;g__Paracoccus;s__Unclassified	65.96	1273	1934332	1273	1934332	5701	1508	1084	0	2866	1784139	623	1.48	66.31	92.24	150193	61.84	7.76	16
MAG542	d__Bacteria;p__Pseudomonadota;c__Gammaproteobacteria;o__Burkholderiales;f__Burkholderiaceae_C;g__Paenalcaligenes;s__Unclassified	48.03	1001	2311909	1001	2311909	16202	2573	1234	0	2929	2100744	717	1.27	48.63	90.87	211165	42.1	9.13	36
MAG543	d__Bacteria;p__Chloroflexota;c__Chloroflexia;o__Chloroflexales;f__Roseiflexaceae;g__JADKFS01;s__Unclassified	59.06	2470	4440900	2470	4440900	8158	1856	1153	0	5668	3889857	686	1.28	60.15	87.59	551043	51.36	12.41	22
MAG544	d__Bacteria;p__Verrucomicrobiota;c__Verrucomicrobiae;o__Chthoniobacterales;f__Xiphinematobacteraceae;g__PSRL01;s__Unclassified	46.33	226	2544028	226	2544028	73706	16848	5238	0	2416	2265480	938	0.95	46.97	89.05	278548	41.15	10.95	39
MAG545	d__Bacteria;p__Pseudomonadota;c__Alphaproteobacteria;o__Sphingomonadales;f__Sphingomonadaceae;g__Allosphingosinicella;s__Unclassified	66.64	54	3778679	54	3778679	269344	107408	37166	0	3633	3396645	935	0.96	66.98	89.89	382034	63.6	10.11	48
MAG546	d__Bacteria;p__Bacteroidota;c__Bacteroidia;o__Chitinophagales;f__Chitinophagaceae;g__Ferruginibacter;s__Unclassified	45.42	396	2998606	396	2998606	37229	10595	3621	0	2970	2766216	931	0.99	46	92.25	232390	38.48	7.75	22
MAG547	d__Bacteria;p__Actinomycetota;c__Actinomycetia;o__Actinomycetales;f__Brevibacteriaceae;g__Brevibacterium;s__Brevibacterium aurantiacum	63.44	625	3360509	625	3360509	48826	7737	2448	0	3529	3051912	865	1.05	63.91	90.82	308597	58.78	9.18	47
MAG548	d__Bacteria;p__Actinomycetota;c__Thermoleophilia;o__Gaiellales;f__Gaiellaceae;g__PALSA-600;s__Unclassified	70.3	529	1844079	529	1844079	12389	3929	1977	0	2414	1762284	730	1.31	70.42	95.56	81795	67.53	4.44	25
MAG549	d__Bacteria;p__Eremiobacterota;c__Eremiobacteria;o__Baltobacterales;f__Baltobacteraceae;g__Unclassified;s__Unclassified	62.07	591	2767597	591	2767597	24890	5716	2372	0	3204	2637135	823	1.16	62.2	95.29	130462	59.3	4.71	34
MAG55	d__Bacteria;p__Nitrospirota;c__Nitrospiria;o__Nitrospirales;f__Nitrospiraceae;g__Unclassified;s__Unclassified	58.5	1621	2463078	1621	2463078	5042	1485	1074	0	3615	2173323	601	1.47	58.77	88.24	289755	56.44	11.76	25
MAG550	d__Bacteria;p__Acidobacteriota;c__Blastocatellia;o__Pyrinomonadales;f__Pyrinomonadaceae;g__OLB17;s__Unclassified	57.99	947	2967545	947	2967545	18225	4455	1371	0	3454	2744685	795	1.16	58.53	92.49	222860	51.4	7.51	31
MAG551	d__Bacteria;p__Pseudomonadota;c__Alphaproteobacteria;o__Sphingomonadales;f__Sphingomonadaceae;g__Allosphingosinicella;s__Unclassified	68.52	164	3166878	164	3166878	99456	30099	9442	0	3362	2910348	866	1.06	68.95	91.9	256530	63.72	8.1	49
MAG552	d__Bacteria;p__Bacillota;c__Bacilli;o__Staphylococcales;f__Staphylococcaceae;g__Staphylococcus;s__Staphylococcus equorum	33.09	109	2425361	109	2425361	289723	62765	8715	0	2359	2074983	880	0.97	34.07	85.55	350378	27.29	14.45	35
MAG553	d__Bacteria;p__Actinomycetota;c__Actinomycetia;o__Actinomycetales;f__Micrococcaceae;g__Kocuria;s__Unclassified	65.04	540	2239838	540	2239838	25792	4917	2270	0	2382	2047401	860	1.06	65.38	91.41	192437	61.43	8.59	33
MAG554	d__Bacteria;p__Pseudomonadota;c__Gammaproteobacteria;o__Burkholderiales;f__Burkholderiaceae;g__Telluria;s__Unclassified	65.9	732	3305110	732	3305110	22274	5634	2328	0	3483	3016839	866	1.05	66.58	91.28	288271	58.77	8.72	37
MAG555	d__Bacteria;p__Nitrospirota;c__Nitrospiria;o__Nitrospirales;f__Nitrospiraceae;g__Nitrospira_F;s__Unclassified	56.21	579	3545712	579	3545712	36428	8286	2859	0	3950	3135846	794	1.11	56.64	88.44	409866	52.89	11.56	32
MAG556	d__Bacteria;p__Chloroflexota;c__Anaerolineae;o__Anaerolineales;f__EnvOPS12;g__UBA12294;s__Unclassified	56.63	825	3282306	825	3282306	20098	4328	2285	0	3730	3007221	806	1.14	57.49	91.62	275085	47.19	8.38	23
MAG557	d__Bacteria;p__Acidobacteriota;c__Blastocatellia;o__RBC074;f__RBC074;g__JAFDVL01;s__Unclassified	52.66	2506	3716198	2506	3716198	7202	1445	1066	0	5038	3315258	658	1.36	53.27	89.21	400940	47.64	10.79	31
MAG558	d__Bacteria;p__Pseudomonadota;c__Alphaproteobacteria;o__Sphingomonadales;f__Sphingomonadaceae;g__Sphingomonas_I;s__Unclassified	64.1	195	4335995	195	4335995	162005	36408	11650	0	4227	3904017	924	0.97	64.46	90.04	431978	60.81	9.96	47
MAG559	d__Bacteria;p__Bacillota;c__Bacilli;o__Lactobacillales;f__Enterococcaceae;g__Enterococcus_I;s__Unclassified	38.31	379	1532134	379	1532134	18330	4829	2113	0	1665	1364592	820	1.09	38.98	89.06	167542	32.85	10.94	12
MAG56	d__Bacteria;p__Nitrospirota;c__Nitrospiria;o__Nitrospirales;f__Nitrospiraceae;g__Nitrospira_F;s__Unclassified	54.65	2143	3289272	2143	3289272	6698	1501	1078	0	4969	2831850	570	1.51	55.05	86.09	457422	52.19	13.91	34
MAG560	d__Bacteria;p__Bacteroidota;c__Bacteroidia;o__Chitinophagales;f__Saprospiraceae;g__JADKGY01;s__Unclassified	43.14	1654	2496536	1654	2496536	5408	1460	1065	0	3222	2289198	710	1.29	43.59	91.69	207338	38.14	8.31	17
MAG561	d__Bacteria;p__Actinomycetota;c__Actinomycetia;o__Unclassified;f__Unclassified;g__Unclassified;s__Unclassified	71.54	1647	2159203	1647	2159203	3513	1254	1041	0	3290	2035899	619	1.52	71.56	94.29	123304	71.23	5.71	6
MAG562	d__Bacteria;p__Actinomycetota;c__Thermoleophilia;o__Gaiellales;f__Gaiellaceae;g__GMQP-bins7;s__Unclassified	70.87	301	2204160	301	2204160	38583	8970	3753	0	2517	2082021	827	1.14	70.92	94.46	122139	69.98	5.54	44
MAG563	d__Bacteria;p__Actinomycetota;c__Actinomycetia;o__Actinomycetales;f__Microbacteriaceae;g__Curtobacterium;s__Curtobacterium sp002412165	72.36	589	2441069	589	2441069	15895	5057	2123	0	2724	2214219	813	1.12	72.31	90.71	226850	72.93	9.29	32
MAG564	d__Bacteria;p__Acidobacteriota;c__Terriglobia;o__Bryobacterales;f__Bryobacteraceae;g__Bog-105;s__Unclassified	58.74	1061	2437472	1061	2437472	19688	2591	1270	0	3121	2282307	731	1.28	58.93	93.63	155165	55.87	6.37	30
MAG565	d__Bacteria;p__Actinomycetota;c__Actinomycetia;o__Actinomycetales;f__Dermatophilaceae;g__Terrabacter;s__Unclassified	71.44	684	2431200	684	2431200	14970	3822	2187	0	2857	2232894	782	1.18	71.56	91.84	198306	70.11	8.16	23
MAG566	d__Bacteria;p__Chloroflexota;c__Limnocylindria;o__Limnocylindrales;f__CSP1-4;g__SPCO01;s__Unclassified	72.02	442	2327353	442	2327353	38169	6623	2614	0	2510	2161941	861	1.08	71.88	92.89	165412	73.82	7.11	28
MAG567	d__Bacteria;p__Acidobacteriota;c__Blastocatellia;o__Pyrinomonadales;f__Pyrinomonadaceae;g__OLB17;s__Unclassified	50.84	1427	3115821	1427	3115821	9784	2463	1212	0	4117	2848689	692	1.32	51.5	91.43	267132	43.86	8.57	45
MAG568	d__Bacteria;p__Patescibacteria;c__Saccharimonadia;o__Saccharimonadales;f__UBA1547;g__Unclassified;s__Unclassified	50.46	86	656053	86	656053	36103	10629	3516	0	774	594561	768	1.18	51.29	90.63	61492	42.48	9.37	30
MAG569	d__Bacteria;p__Pseudomonadota;c__Gammaproteobacteria;o__Diplorickettsiales;f__Diplorickettsiaceae;g__Aquirickettsiella;s__Unclassified	37.98	330	1638224	330	1638224	26963	7698	2105	0	1747	1476792	845	1.07	38.54	90.15	161432	32.78	9.85	37
MAG57	d__Bacteria;p__Bacteroidota;c__Bacteroidia;o__Flavobacteriales;f__Weeksellaceae;g__MFBS3-17;s__MFBS3-17 sp014041915	43.18	348	1291740	348	1291740	12653	4172	2202	0	1496	1183923	791	1.16	44.07	91.65	107817	33.46	8.35	12
MAG570	d__Bacteria;p__Acidobacteriota;c__Blastocatellia;o__Pyrinomonadales;f__Pyrinomonadaceae;g__OLB17;s__Unclassified	54.07	724	3863697	724	3863697	27639	6877	2769	0	3811	3462282	909	0.99	54.74	89.61	401415	48.25	10.39	45
MAG571	d__Bacteria;p__Pseudomonadota;c__Gammaproteobacteria;o__Xanthomonadales;f__Xanthomonadaceae;g__JACMKK01;s__Unclassified	69.41	535	1875582	535	1875582	15339	4074	1883	0	2152	1724631	801	1.15	69.39	91.95	150951	69.68	8.05	37
MAG572	d__Bacteria;p__Actinomycetota;c__Actinomycetia;o__Actinomycetales;f__Microbacteriaceae;g__Leucobacter;s__Unclassified	59.95	197	1718462	197	1718462	62384	12021	3762	0	1717	1592238	927	1	60.26	92.65	126224	56.07	7.35	35
MAG573	d__Bacteria;p__Actinomycetota;c__Actinomycetia;o__Mycobacteriales;f__Mycobacteriaceae;g__Corynebacterium;s__Corynebacterium casei	56.11	308	1347217	308	1347217	13695	4838	2695	0	1445	1222131	846	1.07	56.88	90.72	125086	48.58	9.28	19
MAG574	d__Bacteria;p__Actinomycetota;c__Actinomycetia;o__Actinomycetales;f__Micrococcaceae;g__Enteractinococcus;s__Unclassified	57.12	329	2216833	329	2216833	40058	8399	3473	0	2309	2036427	882	1.04	57.53	91.86	180406	52.43	8.14	32
MAG575	d__Bacteria;p__Actinomycetota;c__Actinomycetia;o__Mycobacteriales;f__Micromonosporaceae;g__Rhizocola;s__Unclassified	68.29	1093	5842859	1093	5842859	41392	6864	2627	0	6074	5358351	882	1.04	68.69	91.71	484508	63.91	8.29	47
MAG576	d__Bacteria;p__Pseudomonadota;c__Alphaproteobacteria;o__Sphingomonadales;f__Sphingomonadaceae;g__Allosphingosinicella;s__Unclassified	67.07	398	2957994	398	2957994	44124	10129	3552	0	3319	2729640	822	1.12	67.43	92.28	228354	62.77	7.72	43
MAG577	d__Archaea;p__Thermoproteota;c__Nitrososphaeria;o__Nitrososphaerales;f__Nitrososphaeraceae;g__Nitrosocosmicus;s__Nitrosocosmicus oleophilus	33.85	718	2401340	718	2401340	15181	3750	1845	0	2974	1796781	604	1.24	35.3	74.82	604559	29.53	25.18	22
MAG578	d__Bacteria;p__Actinomycetota;c__Actinomycetia;o__Mycobacteriales;f__Mycobacteriaceae;g__Gordonia;s__Unclassified	69.83	258	2302640	258	2302640	29623	10649	5146	0	2345	2148270	916	1.02	70.11	93.3	154370	65.86	6.7	26
MAG579	d__Bacteria;p__Actinomycetota;c__Acidimicrobiia;o__Acidimicrobiales;f__JADJXE01;g__Unclassified;s__Unclassified	69.4	886	3009026	886	3009026	16252	3914	1943	0	3727	2888325	775	1.24	69.42	95.99	120701	68.94	4.01	37
MAG58	d__Bacteria;p__Pseudomonadota;c__Alphaproteobacteria;o__Sphingomonadales;f__Sphingomonadaceae;g__Allosphingosinicella;s__Unclassified	68.51	664	2453834	664	2453834	16630	4284	2002	0	3052	2268312	743	1.24	68.86	92.44	185522	64.3	7.56	31
MAG580	d__Bacteria;p__Actinomycetota;c__Actinomycetia;o__Actinomycetales;f__Dermatophilaceae;g__Kineosphaera;s__Unclassified	71.51	543	3937973	543	3937973	63978	11857	2968	0	3930	3507723	893	1	71.57	89.07	430250	71.03	10.93	40
MAG581	d__Bacteria;p__Gemmatimonadota;c__Gemmatimonadetes;o__Gemmatimonadales;f__Gemmatimonadaceae;g__JABFXC01;s__Unclassified	69.41	556	3356273	556	3356273	37609	8482	2811	0	3396	3090555	910	1.01	69.67	92.08	265718	66.41	7.92	34
MAG582	d__Archaea;p__Thermoproteota;c__Nitrososphaeria;o__Nitrososphaerales;f__Nitrososphaeraceae;g__TH1177;s__Unclassified	29.45	954	2381173	954	2381173	10669	2482	1627	0	3051	1800606	590	1.28	31.29	75.62	580567	23.72	24.38	20
MAG583	d__Bacteria;p__Bacteroidota;c__Bacteroidia;o__Chitinophagales;f__Chitinophagaceae;g__JAEWAC01;s__Unclassified	51.94	1246	2247599	1246	2247599	7519	1852	1150	0	2851	2003664	703	1.27	53.08	89.15	243935	42.54	10.85	17
MAG584	d__Bacteria;p__Patescibacteria;c__Saccharimonadia;o__Saccharimonadales;f__UBA1547;g__JAEWBQ01;s__Unclassified	52.08	64	1031962	64	1031962	126600	54305	9911	0	1137	928758	817	1.1	52.85	90	103204	45.19	10	47
MAG585	d__Bacteria;p__Bacteroidota;c__Bacteroidia;o__Chitinophagales;f__Chitinophagaceae;g__Segetibacter;s__Unclassified	44.03	1847	2730998	1847	2730998	5851	1458	1070	0	3626	2424033	669	1.33	44.64	88.76	306965	39.24	11.24	23
MAG586	d__Bacteria;p__Acidobacteriota;c__Terriglobia;o__Bryobacterales;f__Bryobacteraceae;g__Bog-105;s__Unclassified	58.53	1215	2240240	1215	2240240	5848	1939	1199	0	3011	2092824	695	1.34	58.79	93.42	147416	54.93	6.58	21
MAG587	d__Bacteria;p__Myxococcota;c__Polyangia;o__Fen-1088;f__Fen-1088;g__FEN-1088;s__Unclassified	68.68	615	5464811	615	5464811	37352	11232	4436	0	5086	5041746	991	0.93	68.84	92.26	423065	66.69	7.74	36
MAG588	d__Bacteria;p__Pseudomonadota;c__Gammaproteobacteria;o__Xanthomonadales;f__Xanthomonadaceae;g__JABFWF01;s__Unclassified	70.86	501	2050473	501	2050473	23347	4831	2093	0	2366	1907172	806	1.15	70.87	93.01	143301	70.74	6.99	34
MAG589	d__Bacteria;p__Acidobacteriota;c__Vicinamibacteria;o__Vicinamibacterales;f__UBA2999;g__JAMQPK01;s__Unclassified	62.35	1690	5103134	1690	5103134	13902	3232	1836	0	6153	4640052	754	1.21	62.64	90.93	463082	59.45	9.07	51
MAG59	d__Bacteria;p__Acidobacteriota;c__Blastocatellia;o__Pyrinomonadales;f__Pyrinomonadaceae;g__OLB17;s__Unclassified	55.86	1448	2662997	1448	2662997	7228	1934	1131	0	3591	2382735	664	1.35	56.63	89.48	280262	49.34	10.52	31
MAG590	d__Bacteria;p__Patescibacteria;c__Saccharimonadia;o__Saccharimonadales;f__UBA1547;g__JALRBM01;s__Unclassified	50.44	255	1189455	255	1189455	33794	6286	2160	0	1635	1070781	655	1.37	50.87	90.02	118674	46.6	9.98	43
MAG591	d__Bacteria;p__Bacteroidota;c__Bacteroidia;o__Chitinophagales;f__Saprospiraceae;g__JADKGY01;s__Unclassified	46.57	1385	3289062	1385	3289062	14291	2767	1254	0	3443	3090855	898	1.05	46.97	93.97	198207	40.25	6.03	13
MAG592	d__Bacteria;p__Bacteroidota;c__Bacteroidia;o__Sphingobacteriales;f__Sphingobacteriaceae;g__Sphingobacterium;s__Unclassified	44.61	407	1674202	407	1674202	13655	4472	2528	0	1826	1522446	834	1.09	45.27	90.94	151756	38.01	9.06	16
MAG593	d__Bacteria;p__Pseudomonadota;c__Alphaproteobacteria;o__Rhizobiales;f__Xanthobacteraceae;g__Pseudolabrys;s__Unclassified	66.5	1217	2268286	1217	2268286	8475	1989	1152	0	3044	2069160	680	1.34	66.75	91.22	199126	63.85	8.78	15
MAG594	d__Archaea;p__Thermoproteota;c__Nitrososphaeria;o__Nitrososphaerales;f__Nitrosopumilaceae;g__Nitrosotenuis;s__Nitrosotenuis sp021824845	41.78	580	850490	580	850490	6009	1441	1067	0	1463	777840	532	1.72	42.32	91.46	72650	36.04	8.54	17
MAG595	d__Bacteria;p__Chloroflexota;c__Chloroflexia;o__Chloroflexales;f__Herpetosiphonaceae;g__LB3-1;s__Unclassified	61.96	2736	4217819	2736	4217819	5847	1540	1078	0	5382	3752121	697	1.28	63.02	88.96	465698	53.41	11.04	16
MAG596	d__Bacteria;p__Bacillota;c__Bacilli;o__Lactobacillales;f__Carnobacteriaceae;g__Atopostipes;s__Unclassified	35.35	310	1666491	310	1666491	27724	7514	2527	0	1759	1428942	812	1.06	36.08	85.75	237549	30.99	14.25	37
MAG597	d__Bacteria;p__Actinomycetota;c__Actinomycetia;o__Propionibacteriales;f__Propionibacteriaceae;g__Brevilactibacter;s__Brevilactibacter sp014164685	71.97	401	2062511	401	2062511	26602	7308	2292	0	2285	1936506	847	1.11	72.12	93.89	126005	69.65	6.11	27
MAG598	d__Bacteria;p__Bacillota;c__Bacilli;o__Lactobacillales;f__Aerococcaceae;g__Jeotgalibaca;s__Jeotgalibaca porci	40.07	313	1224004	313	1224004	25095	5947	1644	0	1391	1089363	783	1.14	40.66	89	134641	35.26	11	10
MAG599	d__Bacteria;p__Cyanobacteriota;c__Cyanobacteriia;o__Cyanobacteriales;f__Microcoleaceae;g__Microcoleus;s__Unclassified	45.8	2194	4059417	2194	4059417	10769	1939	1166	0	4971	3296874	663	1.22	46.74	81.22	762543	41.71	18.78	24
MAG6	d__Bacteria;p__Actinomycetota;c__Actinomycetia;o__Actinomycetales;f__Microbacteriaceae;g__Leucobacter;s__Unclassified	65.64	622	1895131	622	1895131	15833	3195	1780	0	2167	1729782	798	1.14	66.03	91.28	165349	61.62	8.72	23
MAG60	d__Bacteria;p__Bacillota;c__Bacilli;o__Bacillales;f__Planococcaceae;g__Sporosarcina;s__Unclassified	38.84	244	2898671	244	2898671	78414	19870	4945	0	2960	2504670	846	1.02	39.48	86.41	394001	34.74	13.59	23
MAG600	d__Bacteria;p__Dormibacterota;c__Dormibacteria;o__CF-121;f__Unclassified;g__Unclassified;s__Unclassified	66.8	682	2197805	682	2197805	21033	3504	1906	0	2788	1932138	693	1.27	67.07	87.91	265667	64.79	12.09	27
MAG601	d__Bacteria;p__Actinomycetota;c__Thermoleophilia;o__Solirubrobacterales;f__Solirubrobacteraceae;g__Conexibacter;s__Unclassified	72.07	249	3337903	249	3337903	76339	20126	5748	0	3512	3072081	875	1.05	72.29	92.04	265822	69.52	7.96	46
MAG602	d__Bacteria;p__Pseudomonadota;c__Alphaproteobacteria;o__Rhizobiales;f__Xanthobacteraceae;g__Bradyrhizobium;s__Unclassified	62.94	682	5441950	682	5441950	41860	8641	4745	0	5758	4690947	815	1.06	63.53	86.2	751003	59.24	13.8	36
MAG603	d__Bacteria;p__Cyanobacteriota;c__Cyanobacteriia;o__Cyanobacteriales;f__Microcoleaceae;g__Microcoleus;s__Unclassified	45.81	1336	5753843	1336	5753843	18880	4857	2473	0	5779	4613229	798	1	46.75	80.18	1140614	42.01	19.82	26
MAG604	d__Bacteria;p__Pseudomonadota;c__Alphaproteobacteria;o__Sphingomonadales;f__Sphingomonadaceae;g__Sphingorhabdus_B;s__Unclassified	59.26	664	2491503	664	2491503	14573	4348	1979	0	2970	2289699	771	1.19	59.73	91.9	201804	53.96	8.1	35
MAG605	d__Bacteria;p__Bacteroidota;c__Bacteroidia;o__Sphingobacteriales;f__Sphingobacteriaceae;g__Sphingobacterium;s__Unclassified	37.42	407	2558040	407	2558040	66371	8847	2835	0	2469	2316999	938	0.97	38.22	90.58	241041	29.78	9.42	36
MAG606	d__Bacteria;p__Pseudomonadota;c__Gammaproteobacteria;o__Pseudomonadales;f__Moraxellaceae;g__Psychrobacter;s__Psychrobacter faecalis	43.81	379	2812766	379	2812766	55389	11901	3489	0	2554	2350278	920	0.91	45.84	83.56	462488	33.48	16.44	41
MAG607	d__Bacteria;p__Actinomycetota;c__Actinomycetia;o__Mycobacteriales;f__Mycobacteriaceae;g__Dietzia;s__Unclassified	69.97	598	2897800	598	2897800	32802	6231	2298	0	3134	2639415	842	1.08	70.12	91.08	258385	68.43	8.92	38
MAG608	d__Bacteria;p__Gemmatimonadota;c__Gemmatimonadetes;o__Gemmatimonadales;f__Gemmatimonadaceae;g__JABFXC01;s__Unclassified	67.35	596	3802675	596	3802675	92206	11616	2573	0	3852	3519108	914	1.01	67.53	92.54	283567	65.1	7.46	35
MAG609	d__Bacteria;p__Actinomycetota;c__Actinomycetia;o__Mycobacteriales;f__Antricoccaceae;g__Unclassified;s__Unclassified	69.44	590	3178495	590	3178495	36250	6940	2692	0	3369	2883054	856	1.06	69.63	90.71	295441	67.6	9.29	34
MAG61	d__Bacteria;p__Bacteroidota;c__Bacteroidia;o__Flavobacteriales;f__Weeksellaceae;g__Kaistella;s__Kaistella pullorum	43.47	452	1303540	452	1303540	15147	3283	1495	0	1581	1199997	759	1.21	44.45	92.06	103543	32.1	7.94	18
MAG610	d__Bacteria;p__Chloroflexota;c__Chloroflexia;o__Thermomicrobiales;f__UBA6265;g__UBA6265;s__Unclassified	56.47	1248	2716301	1248	2716301	12463	2400	1209	0	3528	2472948	701	1.3	56.86	91.04	243353	52.53	8.96	33
MAG611	d__Bacteria;p__Bacillota;c__Bacilli;o__Lactobacillales;f__Aerococcaceae;g__Jeotgalibaca;s__Jeotgalibaca porci	40.2	156	1058697	156	1058697	40492	10020	2975	0	1109	952509	859	1.05	40.74	89.97	106188	35.34	10.03	5
MAG612	d__Archaea;p__Thermoproteota;c__Nitrososphaeria;o__Nitrososphaerales;f__Nitrososphaeraceae;g__Nitrosocosmicus;s__Unclassified	31.05	1035	1699836	1035	1699836	7384	1655	1091	0	2442	1298883	532	1.44	32.69	76.41	400953	25.73	23.59	36
MAG613	d__Bacteria;p__Actinomycetota;c__Actinomycetia;o__Actinomycetales;f__Microbacteriaceae;g__Microbacterium;s__Unclassified	62.88	1372	1984869	1372	1984869	4626	1425	1061	0	3036	1786023	588	1.53	63.15	89.98	198846	60.47	10.02	39
MAG614	d__Bacteria;p__Acidobacteriota;c__Blastocatellia;o__RBC074;f__RBC074;g__Unclassified;s__Unclassified	63.96	1571	3519380	1571	3519380	12589	2496	1296	0	4136	3214644	777	1.18	64.53	91.34	304736	57.99	8.66	22
MAG615	d__Bacteria;p__Actinomycetota;c__Actinomycetia;o__Actinomycetales;f__Dermatophilaceae;g__Ornithinicoccus;s__Ornithinicoccus ciconiae	69.58	615	2955022	615	2955022	34662	6010	2521	0	3148	2712597	862	1.07	69.76	91.8	242425	67.66	8.2	38
MAG616	d__Bacteria;p__Pseudomonadota;c__Gammaproteobacteria;o__Burkholderiales;f__Burkholderiaceae_B;g__Giesbergeria;s__Unclassified	63.51	1149	2302480	1149	2302480	11209	2108	1207	0	2912	2030121	697	1.26	64.22	88.17	272359	58.26	11.83	26
MAG617	d__Bacteria;p__Actinomycetota;c__Actinomycetia;o__Mycobacteriales;f__Mycobacteriaceae;g__Corynebacterium;s__Corynebacterium sp012837295	70.3	400	1755275	400	1755275	22422	5392	2265	0	1853	1580580	853	1.06	70.62	90.05	174695	67.4	9.95	26
MAG618	d__Bacteria;p__Nitrospirota;c__Nitrospiria;o__Nitrospirales;f__Nitrospiraceae;g__Nitrospira_C;s__Unclassified	56.77	1957	2937412	1957	2937412	7458	1450	1068	0	4273	2561913	600	1.45	57	87.22	375499	55.18	12.78	41
MAG619	d__Bacteria;p__Pseudomonadota;c__Gammaproteobacteria;o__Burkholderiales;f__Burkholderiaceae_B;g__Ramlibacter;s__Unclassified	70.54	583	3782334	583	3782334	35274	8492	3203	0	4073	3525717	866	1.08	70.64	93.22	256617	69.24	6.78	31
MAG62	d__Bacteria;p__Actinomycetota;c__Actinomycetia;o__Actinomycetales;f__Micrococcaceae;g__Glutamicibacter;s__Glutamicibacter sp004320535	55.66	1099	3445067	1099	3445067	15463	3524	1740	0	4111	3034875	738	1.19	56.27	88.09	410192	51.15	11.91	62
MAG620	d__Bacteria;p__Actinomycetota;c__Thermoleophilia;o__Gaiellales;f__Gaiellaceae;g__JACCRW01;s__Unclassified	71.98	497	2101450	497	2101450	29718	5178	2056	0	2578	1997181	775	1.23	72.18	95.04	104269	68.16	4.96	29
MAG621	d__Bacteria;p__Chloroflexota;c__UBA6077;o__UBA6077;f__CF-72;g__CF-72;s__Unclassified	66.91	933	3085228	933	3085228	19160	3609	1891	0	3507	2883666	822	1.14	66.98	93.47	201562	65.88	6.53	22
MAG622	d__Bacteria;p__Acidobacteriota;c__Vicinamibacteria;o__Vicinamibacterales;f__UBA2999;g__12-FULL-67-14b;s__Unclassified	63.92	1167	4930457	1167	4930457	24611	5948	1900	0	5147	4687689	911	1.04	64.24	95.08	242768	57.87	4.92	28
MAG623	d__Bacteria;p__Actinomycetota;c__Actinomycetia;o__Actinomycetales;f__Microbacteriaceae;g__Leucobacter;s__Unclassified	65.01	679	2641978	679	2641978	26009	4442	1997	0	2914	2402346	824	1.1	65.44	90.93	239632	60.7	9.07	43
MAG624	d__Bacteria;p__Acidobacteriota;c__Blastocatellia;o__Pyrinomonadales;f__Pyrinomonadaceae;g__PSRF01;s__Unclassified	50.72	2173	4399409	2173	4399409	8925	2149	1243	0	5221	3866034	740	1.19	51.07	87.88	533375	48.13	12.12	32
MAG625	d__Bacteria;p__Actinomycetota;c__Actinomycetia;o__Propionibacteriales;f__Propionibacteriaceae;g__Brevilactibacter;s__Brevilactibacter sinopodophylli	71.36	398	2529470	398	2529470	37412	9660	2718	0	2648	2344131	885	1.05	71.56	92.67	185339	68.9	7.33	42
MAG626	d__Bacteria;p__Pseudomonadota;c__Gammaproteobacteria;o__Burkholderiales;f__Burkholderiaceae_B;g__Comamonas;s__Comamonas sp015478895	58.48	1121	2023020	1121	2023020	7503	1831	1138	0	2757	1786998	648	1.36	59.33	88.33	236022	51.99	11.67	33
MAG627	d__Bacteria;p__Bacillota;c__Bacilli;o__Lactobacillales;f__Enterococcaceae;g__Enterococcus_I;s__Enterococcus_I alcedinis	38.22	463	2068451	463	2068451	23129	5478	2219	0	2264	1823415	805	1.09	38.88	88.15	245036	33.26	11.85	17
MAG628	d__Bacteria;p__Bacillota_A;c__Clostridia;o__Peptostreptococcales;f__Filifactoraceae;g__Acetoanaerobium;s__Unclassified	38.94	355	1525343	355	1525343	53997	6903	1756	0	1737	1370604	789	1.14	40.01	89.86	154739	29.51	10.14	8
MAG629	d__Bacteria;p__Cyanobacteriota;c__Cyanobacteriia;o__Cyanobacteriales;f__Microcoleaceae;g__Microcoleus;s__Unclassified	46.22	2445	3736119	2445	3736119	4965	1526	1088	0	4692	3064350	653	1.26	47.16	82.02	671769	41.93	17.98	30
MAG63	d__Bacteria;p__Bacillota_A;c__Clostridia;o__Lachnospirales;f__Lachnospiraceae;g__Mediterraneibacter;s__Mediterraneibacter faecigallinarum	51.39	898	1662021	898	1662021	12188	1931	1164	0	2137	1503090	703	1.29	52.26	90.44	158931	43.13	9.56	16
MAG630	d__Bacteria;p__Pseudomonadota;c__Gammaproteobacteria;o__Burkholderiales;f__Burkholderiaceae_C;g__Paenalcaligenes;s__Unclassified	46.77	146	2437030	146	2437030	134504	28694	7325	0	2387	2259285	947	0.98	47.4	92.71	177745	38.76	7.29	42
MAG631	d__Bacteria;p__Sumerlaeota;c__Sumerlaeia;o__Sumerlaeales;f__Sumerlaeaceae;g__Unclassified;s__Unclassified	55.1	1045	1843850	1045	1843850	7273	1789	1133	0	2376	1663758	700	1.29	55.73	90.23	180092	49.29	9.77	23
MAG632	d__Bacteria;p__Chloroflexota;c__Anaerolineae;o__Promineofilales;f__Promineofilaceae;g__Promineofilum;s__Unclassified	62.49	936	3182801	936	3182801	13660	3738	2031	0	3518	2837598	807	1.11	63.71	89.15	345203	52.43	10.85	33
MAG633	d__Bacteria;p__Pseudomonadota;c__Unclassified;o__Unclassified;f__Unclassified;g__Unclassified;s__Unclassified	64.69	864	1735073	864	1735073	5446	1906	1563	0	2229	1601997	719	1.28	64.95	92.33	133076	61.64	7.67	21
MAG634	d__Bacteria;p__Bacteroidota;c__Bacteroidia;o__Chitinophagales;f__Chitinophagaceae;g__UBA3961;s__Unclassified	45.82	1964	3263384	1964	3263384	6742	1659	1106	0	4274	2980656	697	1.31	46.34	91.34	282728	40.36	8.66	34
MAG635	d__Bacteria;p__Pseudomonadota;c__Gammaproteobacteria;o__Steroidobacterales;f__Steroidobacteraceae;g__JADGHX01;s__Unclassified	64.22	927	7677339	927	7677339	46266	9915	4385	0	7386	7116135	963	0.96	64.42	92.69	561204	61.68	7.31	42
MAG636	d__Bacteria;p__Actinomycetota;c__Acidimicrobiia;o__Acidimicrobiales;f__AC-14;g__CADCTB01;s__Unclassified	71.53	460	3877068	460	3877068	65570	14041	3618	0	4299	3563583	829	1.11	71.84	91.91	313485	68.04	8.09	47
MAG637	d__Bacteria;p__Cyanobacteriota;c__Vampirovibrionia;o__Caenarcaniphilales;f__Caenarcanaceae;g__Unclassified;s__Unclassified	38.42	846	1710371	846	1710371	8383	2161	1195	0	2315	1539681	665	1.35	39.39	90.02	170690	29.72	9.98	29
MAG638	d__Bacteria;p__Bacteroidota;c__Bacteroidia;o__Flavobacteriales;f__Flavobacteriaceae;g__Flavobacterium;s__Unclassified	46.06	57	2969042	57	2969042	285249	86951	30473	0	2697	2734044	1014	0.91	47.03	92.09	234998	34.68	7.91	43
MAG639	d__Archaea;p__Thermoproteota;c__Nitrososphaeria;o__Nitrososphaerales;f__Nitrososphaeraceae;g__Nitrososphaera;s__Unclassified	50.88	2088	3702756	2088	3702756	8741	1815	1094	0	5412	3225966	596	1.46	51.55	87.12	476790	46.39	12.88	64
MAG64	d__Bacteria;p__Chloroflexota;c__Chloroflexia;o__Thermomicrobiales;f__UBA6265;g__JAMLHN01;s__Unclassified	61.68	899	3825805	899	3825805	20570	5190	2218	0	4108	3395814	827	1.07	62	88.76	429991	59.21	11.24	38
MAG640	d__Bacteria;p__Bacillota;c__Bacilli;o__Bacillales;f__Planococcaceae;g__Psychrobacillus;s__Unclassified	36.53	559	3235279	559	3235279	39436	7341	2679	0	3590	2799960	780	1.11	37.07	86.54	435319	33.04	13.46	29
MAG641	d__Bacteria;p__Bacillota;c__Bacilli;o__Lactobacillales;f__Aerococcaceae;g__Ruoffia;s__Ruoffia sp020112395	35.62	263	2076113	263	2076113	143474	24470	2820	0	2117	1823157	861	1.02	36.4	87.82	252956	30.02	12.18	26
MAG642	d__Bacteria;p__Patescibacteria;c__Saccharimonadia;o__Saccharimonadales;f__UBA4665;g__Unclassified;s__Unclassified	53.06	310	515224	310	515224	4660	1723	1102	0	772	466704	605	1.5	53.73	90.58	48520	46.61	9.42	17
MAG643	d__Bacteria;p__Pseudomonadota;c__Gammaproteobacteria;o__Xanthomonadales;f__Xanthomonadaceae;g__Unclassified;s__Unclassified	66.36	525	2208136	525	2208136	18265	5234	2149	0	2436	1995768	819	1.1	66.61	90.38	212368	64	9.62	35
MAG644	d__Bacteria;p__Pseudomonadota;c__Gammaproteobacteria;o__Pseudomonadales;f__Halomonadaceae;g__Halomonas;s__Unclassified	57.95	575	2983196	575	2983196	35506	6047	2671	0	3272	2693667	823	1.1	58.56	90.29	289529	52.29	9.71	40
MAG645	d__Bacteria;p__Actinomycetota;c__Actinomycetia;o__Propionibacteriales;f__Propionibacteriaceae;g__Raineyella;s__Unclassified	70.05	536	2290107	536	2290107	57064	5145	2128	0	2521	2110728	837	1.1	70.19	92.17	179379	68.47	7.83	33
MAG646	d__Bacteria;p__Bacteroidota;c__Bacteroidia;o__Flavobacteriales;f__Weeksellaceae;g__Planobacterium;s__Unclassified	41.07	288	1910154	288	1910154	48509	12609	2580	0	1964	1727019	879	1.03	41.95	90.41	183135	32.75	9.59	28
MAG647	d__Bacteria;p__Acidobacteriota;c__Blastocatellia;o__Pyrinomonadales;f__Pyrinomonadaceae;g__PSRF01;s__Unclassified	54.65	1557	3953517	1557	3953517	11192	2570	1709	0	4481	3618771	808	1.13	55.25	91.53	334746	48.19	8.47	21
MAG648	d__Bacteria;p__Pseudomonadota;c__Alphaproteobacteria;o__Sphingomonadales;f__Sphingomonadaceae;g__Qipengyuania;s__Unclassified	66.67	304	2202701	304	2202701	52842	9780	3422	0	2368	2026251	856	1.08	66.91	91.99	176450	63.95	8.01	43
MAG649	d__Bacteria;p__Cyanobacteriota;c__Cyanobacteriia;o__Cyanobacteriales;f__Phormidiaceae_A;g__Phormidium_B;s__Unclassified	39.13	1334	4205384	1334	4205384	11328	3404	1845	0	4525	3585174	792	1.08	39.89	85.25	620210	34.71	14.75	30
MAG65	d__Bacteria;p__Pseudomonadota;c__Gammaproteobacteria;o__Pseudomonadales;f__Pseudomonadaceae;g__Halopseudomonas;s__Halopseudomonas excrementavium	61.97	491	2626309	491	2626309	38531	6844	2684	0	2822	2406936	853	1.07	62.46	91.65	219373	56.55	8.35	28
MAG650	d__Bacteria;p__Gemmatimonadota;c__Gemmatimonadetes;o__Gemmatimonadales;f__GWC2-71-9;g__Unclassified;s__Unclassified	65.04	752	3716101	752	3716101	34983	7107	2194	0	3845	3423780	890	1.03	65.5	92.13	292321	59.69	7.87	43
MAG651	d__Bacteria;p__Pseudomonadota;c__Unclassified;o__Unclassified;f__Unclassified;g__Unclassified;s__Unclassified	65.45	2711	3531239	2711	3531239	4464	1264	1042	0	5549	3165843	571	1.57	65.76	89.65	365396	62.75	10.35	43
MAG652	d__Bacteria;p__Actinomycetota;c__Actinomycetia;o__Actinomycetales;f__Micrococcaceae;g__Paeniglutamicibacter;s__Unclassified	56.59	259	4293546	259	4293546	265546	47403	5258	0	4182	3765531	900	0.97	57.22	87.7	528015	52.07	12.3	63
MAG653	d__Bacteria;p__Pseudomonadota;c__Gammaproteobacteria;o__Burkholderiales;f__SG8-39;g__SCGC-AG-212-J23;s__Unclassified	66.03	853	3832390	853	3832390	52307	5655	2133	0	4739	3667137	774	1.24	66.23	95.69	165253	61.58	4.31	31
MAG654	d__Bacteria;p__Actinomycetota;c__Thermoleophilia;o__Solirubrobacterales;f__Solirubrobacteraceae;g__Unclassified;s__Unclassified	73.82	416	3175199	416	3175199	35251	10452	3677	0	3643	2983743	819	1.15	73.9	93.97	191456	72.68	6.03	42
MAG655	d__Bacteria;p__Actinomycetota;c__Actinomycetia;o__Actinomycetales;f__Brevibacteriaceae;g__Brevibacterium;s__Brevibacterium aurantiacum	63.44	903	4681833	903	4681833	44915	6652	2484	0	5041	4195041	832	1.08	63.85	89.6	486792	59.88	10.4	58
MAG656	d__Bacteria;p__Acidobacteriota;c__Thermoanaerobaculia;o__UBA5704;f__UBA5704;g__UBA5704;s__Unclassified	68.75	1714	6011424	1714	6011424	16725	4010	1927	0	6522	5517066	846	1.08	69.28	91.78	494358	62.82	8.22	45
MAG657	d__Bacteria;p__Actinomycetota;c__Actinomycetia;o__Mycobacteriales;f__Mycobacteriaceae;g__Mycobacterium;s__Unclassified	65.64	649	3408577	649	3408577	29886	7315	2593	0	3922	3190485	813	1.15	65.94	93.6	218092	61.25	6.4	23
MAG658	d__Bacteria;p__Cyanobacteriota;c__Cyanobacteriia;o__Cyanobacteriales;f__Xenococcaceae;g__Waterburya;s__Unclassified	39.71	1300	5182587	1300	5182587	30442	4766	2034	0	5612	4293657	765	1.08	40.93	82.85	888930	33.8	17.15	35
MAG659	d__Bacteria;p__Bacteroidota;c__Bacteroidia;o__Chitinophagales;f__Chitinophagaceae;g__Niabella;s__Niabella sp023423285	41.84	454	2678817	454	2678817	27422	7506	3061	0	2707	2455644	907	1.01	42.7	91.67	223173	32.36	8.33	29
MAG66	d__Bacteria;p__Verrucomicrobiota;c__Verrucomicrobiae;o__Chthoniobacterales;f__UBA10450;g__AV40;s__Unclassified	55.71	267	2732245	267	2732245	49623	14887	4525	0	2749	2531034	921	1.01	55.99	92.64	201211	52.2	7.36	38
MAG660	d__Bacteria;p__Pseudomonadota;c__Alphaproteobacteria;o__Sphingomonadales;f__Sphingomonadaceae;g__Allosphingosinicella;s__Unclassified	67.84	156	3224225	156	3224225	119893	38895	11359	0	3353	2984532	890	1.04	68.25	92.57	239693	62.79	7.43	54
MAG661	d__Bacteria;p__Bacillota;c__Bacilli;o__Exiguobacterales;f__Exiguobacteraceae;g__Exiguobacterium_A;s__Exiguobacterium_A sibiricum	47.99	861	2231531	861	2231531	25569	3056	1332	0	2828	2025822	716	1.27	48.78	90.78	205709	40.19	9.22	14
MAG662	d__Bacteria;p__Pseudomonadota;c__Alphaproteobacteria;o__Sphingomonadales;f__Sphingomonadaceae;g__Sphingomicrobium;s__Unclassified	63.64	90	1767990	90	1767990	82642	34904	10256	0	1880	1660692	883	1.06	63.85	93.93	107298	60.39	6.07	32
MAG663	d__Bacteria;p__CSP1-3;c__CSP1-3;o__CSP1-3;f__13-1-40CM-64-14;g__13-1-40CM-64-14;s__Unclassified	63.6	327	2233677	327	2233677	31854	9977	3216	0	2457	2001228	815	1.1	63.85	89.59	232449	61.44	10.41	49
MAG664	d__Bacteria;p__Actinomycetota;c__Actinomycetia;o__Actinomycetales;f__Dermatophilaceae;g__F2B08;s__Unclassified	70.5	790	3054311	790	3054311	29442	4352	2160	0	3446	2787228	809	1.13	70.65	91.26	267083	68.92	8.74	41
MAG665	d__Bacteria;p__Actinomycetota;c__Actinomycetia;o__Actinomycetales;f__Dermatophilaceae;g__Ornithinicoccus;s__Unclassified	69.58	519	3334621	519	3334621	59668	8995	2888	0	3523	3058068	868	1.06	69.79	91.71	276553	67.3	8.29	36
MAG666	d__Bacteria;p__Actinomycetota;c__Actinomycetia;o__Actinomycetales;f__Microbacteriaceae;g__NC76-1;s__Unclassified	58.47	473	1524843	473	1524843	16806	3586	1950	0	1842	1417311	769	1.21	58.76	92.95	107532	54.61	7.05	41
MAG667	d__Bacteria;p__Bacteroidota;c__Bacteroidia;o__Flavobacteriales;f__Flavobacteriaceae;g__Flavobacterium;s__Unclassified	33.3	210	2425292	210	2425292	59049	18786	5243	0	2178	2087280	958	0.9	34.36	86.06	338012	26.74	13.94	55
MAG668	d__Bacteria;p__Bacillota;c__Bacilli;o__Lactobacillales;f__Lactobacillaceae;g__Lactobacillus;s__Lactobacillus pullistercoris	34.94	272	1244823	272	1244823	23797	5630	2360	0	1424	1113630	782	1.14	35.6	89.46	131193	29.35	10.54	15
MAG669	d__Bacteria;p__Bacteroidota;c__Bacteroidia;o__Flavobacteriales;f__Flavobacteriaceae;g__Flavobacterium;s__Unclassified	34.29	1007	2110049	1007	2110049	12259	2258	1187	0	2766	1927707	697	1.31	35.15	91.36	182342	25.26	8.64	23
MAG67	d__Bacteria;p__Gemmatimonadota;c__Gemmatimonadetes;o__Gemmatimonadales;f__Gemmatimonadaceae;g__Fen-1247;s__Unclassified	67.54	1164	2703897	1164	2703897	11934	2616	1286	0	3353	2532504	755	1.24	67.71	93.66	171393	65.05	6.34	16
MAG670	d__Bacteria;p__Actinomycetota;c__Actinomycetia;o__Actinomycetales;f__Micrococcaceae;g__Arthrobacter;s__Arthrobacter oxydans	66.61	749	3236873	749	3236873	26655	6126	1994	0	3576	2951940	825	1.1	66.97	91.2	284933	62.85	8.8	42
MAG671	d__Bacteria;p__Acidobacteriota;c__Vicinamibacteria;o__Vicinamibacterales;f__UBA2999;g__12-FULL-67-14b;s__Unclassified	64.23	1498	3114722	1498	3114722	8109	2283	1200	0	3767	2961306	786	1.21	64.46	95.07	153416	59.71	4.93	13
MAG672	d__Bacteria;p__Actinomycetota;c__Acidimicrobiia;o__UBA5794;f__ZC4RG35;g__JACZUI01;s__Unclassified	65.49	155	3013127	155	3013127	145794	40266	9005	0	3169	2835075	895	1.05	65.64	94.09	178052	63.09	5.91	45
MAG673	d__Bacteria;p__Bacillota_A;c__Clostridia;o__Clostridiales;f__Clostridiaceae;g__JG1575;s__Unclassified	56.4	803	1732696	803	1732696	10243	2388	1237	0	2213	1514253	684	1.28	57.61	87.39	218443	48	12.61	16
MAG674	d__Bacteria;p__Actinomycetota;c__Actinomycetia;o__Nanopelagicales;f__CAIYMF01;g__JAFIHG01;s__Unclassified	72.28	352	2717751	352	2717751	44513	10669	3657	0	2793	2529894	906	1.03	72.37	93.09	187857	71.12	6.91	44
MAG675	d__Bacteria;p__Acidobacteriota;c__Terriglobia;o__Bryobacterales;f__Bryobacteraceae;g__TMP-7;s__Unclassified	62.1	1817	3228960	1817	3228960	7268	1826	1154	0	4218	3029247	718	1.31	62.46	93.81	199713	56.56	6.19	23
MAG676	d__Bacteria;p__Gemmatimonadota;c__Gemmatimonadetes;o__Gemmatimonadales;f__Gemmatimonadaceae;g__JADGGM01;s__Unclassified	66.84	714	3697048	714	3697048	29185	6726	2664	0	3865	3382107	875	1.05	67.09	91.48	314941	64.15	8.52	26
MAG677	d__Bacteria;p__Acidobacteriota;c__Blastocatellia;o__Pyrinomonadales;f__Pyrinomonadaceae;g__JAFDVJ01;s__Unclassified	52	2701	3964834	2701	3964834	5580	1448	1069	0	5332	3437880	645	1.34	54	86.71	526954	38.96	13.29	20
MAG678	d__Bacteria;p__Bacillota_A;c__Clostridia;o__Clostridiales;f__Clostridiaceae;g__Clostridium;s__Clostridium sp000435835	30.27	442	1525616	442	1525616	21618	4311	1667	0	1594	1355370	850	1.04	30.87	88.84	170246	25.51	11.16	54
MAG679	d__Bacteria;p__Bacteroidota;c__Bacteroidia;o__Chitinophagales;f__Chitinophagaceae;g__Hanamia;s__Unclassified	38.81	592	4330521	592	4330521	44977	9753	3429	0	4184	3843105	919	0.97	39.81	88.74	487416	30.87	11.26	46
MAG68	d__Bacteria;p__Actinomycetota;c__Actinomycetia;o__Actinomycetales;f__Dermatophilaceae;g__CAKUSI01;s__Unclassified	72.52	412	3585811	412	3585811	196247	32416	2257	0	3456	3201420	926	0.96	72.53	89.28	384391	72.44	10.72	44
MAG680	d__Bacteria;p__Actinomycetota;c__Actinomycetia;o__Actinomycetales;f__Microbacteriaceae;g__Agromyces_B;s__Unclassified	68.07	378	2658954	378	2658954	27463	9581	3600	0	2883	2446806	849	1.08	68.25	92.02	212148	66.03	7.98	36
MAG681	d__Archaea;p__Thermoproteota;c__Nitrososphaeria;o__Nitrososphaerales;f__Nitrososphaeraceae;g__JAFAQB01;s__Unclassified	37.16	262	2620615	262	2620615	70515	15402	4300	0	3233	1931406	597	1.23	38.16	73.7	689209	34.35	26.3	26
MAG682	d__Bacteria;p__Bacteroidota;c__Bacteroidia;o__Chitinophagales;f__Chitinophagaceae;g__VBAS01;s__Unclassified	37.41	487	4024202	487	4024202	73457	12642	3571	0	3961	3673962	928	0.98	37.87	91.3	350240	32.59	8.7	38
MAG683	d__Bacteria;p__Pseudomonadota;c__Alphaproteobacteria;o__Sphingomonadales;f__Sphingomonadaceae;g__Allosphingosinicella;s__Unclassified	68.7	306	3228379	306	3228379	63657	16506	4686	0	3546	2978781	840	1.1	69.08	92.27	249598	64.22	7.73	45
MAG684	d__Bacteria;p__Actinomycetota;c__Actinomycetia;o__Actinomycetales;f__Dermabacteraceae;g__Brachybacterium;s__Brachybacterium sp014400405	70.43	321	2064327	321	2064327	29012	7135	3607	0	2082	1889463	908	1.01	70.51	91.53	174864	69.58	8.47	18
MAG685	d__Bacteria;p__Deinococcota;c__Deinococci;o__Deinococcales;f__Trueperaceae;g__Unclassified;s__Unclassified	53.68	575	1226256	575	1226256	12699	2309	1224	0	1657	1168080	705	1.35	53.88	95.26	58176	49.73	4.74	21
MAG686	d__Bacteria;p__Chloroflexota;c__Limnocylindria;o__QHBO01;f__QHBO01;g__JACDBZ01;s__Unclassified	70.71	307	1714256	307	1714256	20750	6192	3131	0	1958	1599600	817	1.14	70.74	93.31	114656	70.22	6.69	26
MAG687	d__Bacteria;p__Acidobacteriota;c__Vicinamibacteria;o__Vicinamibacterales;f__2-12-FULL-66-21;g__JACCXG01;s__Unclassified	65.98	571	5070915	571	5070915	65127	13076	4304	0	4724	4803774	1017	0.93	66.24	94.73	267141	61.26	5.27	43
MAG688	d__Bacteria;p__Pseudomonadota;c__Alphaproteobacteria;o__Sphingomonadales;f__Sphingomonadaceae;g__Sphingorhabdus_B;s__Unclassified	59.23	970	1737348	970	1737348	8587	1833	1141	0	2487	1606545	646	1.43	59.67	92.47	130803	53.87	7.53	23
MAG689	d__Bacteria;p__Bacteroidota;c__Bacteroidia;o__Chitinophagales;f__Chitinophagaceae;g__JAFAEM01;s__Unclassified	45.32	58	4979468	58	4979468	557391	164818	52927	0	4152	4417173	1064	0.83	46.01	88.71	562295	39.97	11.29	39
MAG69	d__Bacteria;p__Actinomycetota;c__Thermoleophilia;o__Gaiellales;f__Gaiellaceae;g__GMQP-bins7;s__Unclassified	71.37	519	1870171	519	1870171	14005	4242	1929	0	2291	1759542	768	1.23	71.5	94.08	110629	69.29	5.92	33
MAG690	d__Bacteria;p__Actinomycetota;c__Thermoleophilia;o__Gaiellales;f__Gaiellaceae;g__GMQP-bins7;s__Unclassified	71.49	677	1829601	677	1829601	12752	2746	1709	0	2440	1725789	707	1.33	71.56	94.33	103812	70.35	5.67	25
MAG691	d__Bacteria;p__Pseudomonadota;c__Gammaproteobacteria;o__Xanthomonadales;f__Xanthomonadaceae;g__Lysobacter;s__Unclassified	66.52	939	3491245	939	3491245	20022	4376	1983	0	4020	3124254	777	1.15	66.82	89.49	366991	63.98	10.51	38
MAG692	d__Bacteria;p__Myxococcota;c__Myxococcia;o__Myxococcales;f__40CM-4-68-19;g__Unclassified;s__Unclassified	71.6	591	3988756	591	3988756	33453	8081	3470	0	3908	3711372	950	0.98	71.64	93.05	277384	71.11	6.95	33
MAG693	d__Bacteria;p__Actinomycetota;c__Actinomycetia;o__Unclassified;f__Unclassified;g__Unclassified;s__Unclassified	69.79	1119	2099225	1119	2099225	5747	1824	1542	0	2813	1920942	683	1.34	69.98	91.51	178283	67.7	8.49	21
MAG694	d__Bacteria;p__Acidobacteriota;c__Thermoanaerobaculia;o__UBA5704;f__UBA5704;g__UBA5704;s__Unclassified	68.3	121	7064299	121	7064299	223218	95961	34101	0	5519	6500733	1178	0.78	68.86	92.02	563566	61.85	7.98	43
MAG695	d__Bacteria;p__Gemmatimonadota;c__Gemmatimonadetes;o__Gemmatimonadales;f__Gemmatimonadaceae;g__UBA4720;s__Unclassified	61.75	844	2369404	844	2369404	21799	3458	1359	0	2841	2239209	788	1.2	62.01	94.51	130195	57.28	5.49	25
MAG696	d__Bacteria;p__Bacillota;c__Bacilli;o__Lactobacillales;f__Lactobacillaceae;g__Limosilactobacillus;s__Limosilactobacillus sp002299975	50.26	606	1418835	606	1418835	11750	2649	1250	0	1703	1231140	723	1.2	51.7	86.77	187695	40.84	13.23	53
MAG697	d__Bacteria;p__Deinococcota;c__Deinococci;o__Deinococcales;f__Deinococcaceae;g__Deinococcus;s__Unclassified	67.41	968	1672315	968	1672315	6553	1749	1120	0	2334	1479237	634	1.4	68.11	88.45	193078	62.08	11.55	34
MAG698	d__Bacteria;p__Pseudomonadota;c__Alphaproteobacteria;o__Sphingomonadales;f__Sphingomonadaceae;g__Allosphingosinicella;s__Unclassified	69.43	212	3083844	212	3083844	67722	22411	7120	0	3224	2857086	886	1.05	69.71	92.65	226758	65.88	7.35	40
MAG699	d__Bacteria;p__Pseudomonadota;c__Gammaproteobacteria;o__Burkholderiales;f__Burkholderiaceae;g__Telluria;s__Unclassified	64.1	1094	4788388	1094	4788388	85366	5236	2189	0	5132	4350750	848	1.07	65.12	90.86	437638	53.98	9.14	46
MAG7	d__Bacteria;p__Acidobacteriota;c__Blastocatellia;o__RBC074;f__RBC074;g__JACPYM01;s__Unclassified	55.23	1932	6282090	1932	6282090	17975	3560	1972	0	6429	5558970	865	1.02	55.89	88.49	723120	50.12	11.51	46
MAG70	d__Bacteria;p__Bacillota;c__Bacilli;o__Lactobacillales;f__Carnobacteriaceae;g__Atopostipes;s__Unclassified	33.57	178	1091584	178	1091584	163462	10847	2337	0	1167	940854	806	1.07	34.44	86.19	150730	28.14	13.81	9
MAG700	d__Bacteria;p__Pseudomonadota;c__Gammaproteobacteria;o__Xanthomonadales;f__Xanthomonadaceae;g__Lysobacter_G;s__Unclassified	67.27	153	2548812	153	2548812	88707	27665	8793	0	2565	2371599	925	1.01	67.47	93.05	177213	64.62	6.95	43
MAG701	d__Bacteria;p__Dormibacterota;c__Dormibacteria;o__Dormibacterales;f__Dormibacteraceae;g__CF-161;s__Unclassified	67.46	778	3309369	778	3309369	27603	5466	2058	0	4002	2943999	736	1.21	67.71	88.96	365370	65.5	11.04	37
MAG702	d__Bacteria;p__Bacteroidota;c__Bacteroidia;o__AKYH767-A;f__Unclassified;g__Unclassified;s__Unclassified	37.2	689	1871181	689	1871181	10641	2860	1697	0	2264	1733892	766	1.21	37.63	92.66	137289	31.83	7.34	18
MAG703	d__Bacteria;p__Patescibacteria;c__Saccharimonadia;o__Saccharimonadales;f__UBA5946;g__Unclassified;s__Unclassified	47.9	41	387627	41	387627	22660	10135	6108	0	458	355869	777	1.18	48.41	91.81	31758	42.12	8.19	22
MAG704	d__Bacteria;p__Bacteroidota;c__Bacteroidia;o__Chitinophagales;f__Chitinophagaceae;g__JAEWAC01;s__Unclassified	51.38	552	3311317	552	3311317	24414	7107	3314	0	3327	2929977	881	1	52.65	88.48	381340	41.68	11.52	24
MAG705	d__Bacteria;p__Nitrospirota;c__Nitrospiria;o__Nitrospirales;f__Nitrospiraceae;g__Nitrospira_F;s__Unclassified	55.78	719	1880658	719	1880658	10564	2693	1735	0	2319	1671858	721	1.23	56.19	88.9	208800	52.53	11.1	18
MAG706	d__Bacteria;p__Bacteroidota;c__Bacteroidia;o__Chitinophagales;f__Chitinophagaceae;g__Unclassified;s__Unclassified	52.45	1201	2066209	1201	2066209	8294	1763	1127	0	2672	1876197	702	1.29	53.58	90.8	190012	41.26	9.2	16
MAG707	d__Bacteria;p__Bacillota_A;c__Clostridia;o__Tissierellales;f__Peptoniphilaceae;g__Gallicola;s__Gallicola sp012798975	37.41	531	1637828	531	1637828	17519	3836	1513	0	1951	1452084	744	1.19	37.99	88.66	185744	32.87	11.34	24
MAG708	d__Bacteria;p__Actinomycetota;c__Actinomycetia;o__Actinomycetales;f__Dermatophilaceae;g__Janibacter;s__Unclassified	71.53	603	2604753	603	2604753	30994	5650	2075	0	2997	2440920	814	1.15	71.68	93.71	163833	69.26	6.29	29
MAG709	d__Bacteria;p__Pseudomonadota;c__Gammaproteobacteria;o__Xanthomonadales;f__Xanthomonadaceae;g__Lysobacter;s__Unclassified	70.2	724	2099701	724	2099701	11971	3118	1744	0	2460	1880892	765	1.17	70.13	89.58	218809	70.86	10.42	30
MAG71	d__Bacteria;p__Actinomycetota;c__UBA4738;o__CADDZG01;f__WHSQ01;g__Unclassified;s__Unclassified	60.83	216	3289247	216	3289247	263756	38619	5204	0	3531	3015069	854	1.07	60.88	91.66	274178	60.33	8.34	62
MAG710	d__Bacteria;p__Chloroflexota;c__Limnocylindria;o__QHBO01;f__QHBO01;g__JACDBZ01;s__Unclassified	69.95	238	2063756	238	2063756	52175	14542	3667	0	2238	1927929	861	1.08	70.06	93.42	135827	68.28	6.58	41
MAG711	d__Bacteria;p__Pseudomonadota;c__Gammaproteobacteria;o__Burkholderiales;f__Burkholderiaceae_C;g__Advenella;s__Unclassified	53.63	1200	2349311	1200	2349311	6749	2083	1202	0	3103	2081442	671	1.32	54.44	88.6	267869	47.33	11.4	7
MAG712	d__Bacteria;p__Gemmatimonadota;c__Gemmatimonadetes;o__Longimicrobiales;f__Longimicrobiaceae;g__Longimicrobium;s__Unclassified	70.92	1097	4596861	1097	4596861	25102	5011	2201	0	4638	3944481	850	1.01	71.54	85.81	652380	67.14	14.19	55
MAG713	d__Bacteria;p__Pseudomonadota;c__Gammaproteobacteria;o__Burkholderiales;f__SG8-39;g__SCGC-AG-212-J23;s__Unclassified	67.02	751	4351263	751	4351263	34360	7986	2660	0	5158	4162374	807	1.19	67.28	95.66	188889	61.28	4.34	34
MAG714	d__Bacteria;p__Pseudomonadota;c__Alphaproteobacteria;o__Rhodobacterales;f__Rhodobacteraceae;g__Paracoccus;s__Unclassified	70.08	601	2007308	601	2007308	14106	4005	1770	0	2437	1860270	763	1.21	70.08	92.67	147038	70.03	7.33	24
MAG715	d__Bacteria;p__Acidobacteriota;c__Vicinamibacteria;o__Vicinamibacterales;f__UBA2999;g__JAMQPK01;s__Unclassified	62.66	196	5018655	196	5018655	189623	43505	12579	0	4603	4674555	1016	0.92	62.99	93.14	344100	58.25	6.86	45
MAG716	d__Bacteria;p__Bacteroidota;c__Bacteroidia;o__Chitinophagales;f__Saprospiraceae;g__JADKGY01;s__Unclassified	45.26	469	2899302	469	2899302	45879	7933	3048	0	2773	2677557	966	0.96	45.74	92.35	221745	39.4	7.65	32
MAG717	d__Bacteria;p__Actinomycetota;c__Actinomycetia;o__Propionibacteriales;f__Nocardioidaceae;g__Nocardioides;s__Unclassified	72.86	544	3685660	544	3685660	43962	9491	3033	0	4031	3469995	861	1.09	73.04	94.15	215665	69.87	5.85	36
MAG718	d__Bacteria;p__Bacteroidota;c__Bacteroidia;o__Flavobacteriales;f__Flavobacteriaceae;g__Flavobacterium;s__Flavobacterium viscosum	32.33	308	1822185	308	1822185	33027	8177	2843	0	2094	1634529	781	1.15	33.12	89.7	187656	25.47	10.3	42
MAG719	d__Bacteria;p__Actinomycetota;c__Thermoleophilia;o__Solirubrobacterales;f__70-9;g__VAYN01;s__Unclassified	68.82	237	2622803	237	2622803	69436	16087	5327	0	2808	2431872	866	1.07	69.28	92.72	190931	62.86	7.28	45
MAG72	d__Bacteria;p__Patescibacteria;c__Saccharimonadia;o__Saccharimonadales;f__UBA5946;g__Unclassified;s__Unclassified	47.62	62	788726	62	788726	96860	73080	4522	0	900	728700	810	1.14	48.14	92.39	60026	41.3	7.61	32
MAG720	d__Bacteria;p__Patescibacteria;c__Saccharimonadia;o__Saccharimonadales;f__UBA1547;g__UBA6022;s__Unclassified	51.65	297	839909	297	839909	13107	3268	1489	0	1159	773391	667	1.38	52.31	92.08	66518	43.96	7.92	31
MAG721	d__Bacteria;p__Armatimonadota;c__Fimbriimonadia;o__Fimbriimonadales;f__Fimbriimonadaceae;g__55-13;s__55-13 sp023423495	55.36	1083	2703852	1083	2703852	16122	2886	1311	0	3489	2500071	717	1.29	55.59	92.46	203781	52.54	7.54	60
MAG722	d__Bacteria;p__Pseudomonadota;c__Alphaproteobacteria;o__Sphingomonadales;f__Sphingomonadaceae;g__Sphingomicrobium;s__Unclassified	65.1	621	2118924	621	2118924	39433	3873	1832	0	2531	1971948	779	1.19	65.33	93.06	146976	62.03	6.94	31
MAG723	d__Bacteria;p__Pseudomonadota;c__Gammaproteobacteria;o__Burkholderiales;f__Burkholderiaceae;g__Glomeribacter;s__Unclassified	52.17	353	1871490	353	1871490	44653	7812	2432	0	2197	1679199	764	1.17	52.95	89.73	192291	45.35	10.27	34
MAG724	d__Bacteria;p__Bacillota;c__Bacilli;o__Haloplasmatales;f__Turicibacteraceae;g__Turicibacter;s__Unclassified	35.35	587	1972203	587	1972203	20396	3690	1928	0	2324	1686192	726	1.18	36.01	85.5	286011	31.44	14.5	19
MAG725	d__Bacteria;p__Acidobacteriota;c__Terriglobia;o__Terriglobales;f__Acidobacteriaceae;g__Palsa-343;s__Unclassified	61.8	1066	3816056	1066	3816056	15586	3904	2065	0	4057	3414033	842	1.06	62.21	89.46	402023	58.33	10.54	36
MAG726	d__Bacteria;p__Chloroflexota;c__Anaerolineae;o__Anaerolineales;f__EnvOPS12;g__UBA12294;s__Unclassified	52.14	1463	4239660	1463	4239660	17314	3182	1738	0	5129	3831651	747	1.21	52.93	90.38	408009	44.76	9.62	38
MAG727	d__Bacteria;p__Actinomycetota;c__Actinomycetia;o__Actinomycetales;f__Micrococcaceae;g__Glutamicibacter;s__Glutamicibacter soli	65.45	347	2842167	347	2842167	50184	12573	3692	0	2871	2523690	879	1.01	66.36	88.79	318477	58.24	11.21	57
MAG728	d__Bacteria;p__Desulfobacterota_B;c__Binatia;o__UBA9968;f__UBA9968;g__DP-20;s__Unclassified	55.9	1703	2960163	1703	2960163	5697	1784	1156	0	4044	2621190	648	1.37	56.56	88.55	338973	50.83	11.45	24
MAG729	d__Bacteria;p__Gemmatimonadota;c__Gemmatimonadetes;o__Gemmatimonadales;f__Gemmatimonadaceae;g__UBA4720;s__Unclassified	60.87	957	2455526	957	2455526	20639	2922	1375	0	2966	2294127	773	1.21	61.16	93.43	161399	56.82	6.57	23
MAG73	d__Bacteria;p__Actinomycetota;c__Actinomycetia;o__Actinomycetales;f__Micrococcaceae;g__Arthrobacter;s__Arthrobacter luteus_A	65.29	636	3218359	636	3218359	55412	6470	2374	0	3472	2910678	838	1.08	65.75	90.44	307681	60.99	9.56	36
MAG730	d__Bacteria;p__Actinomycetota;c__UBA4738;o__CADDZG01;f__WHSQ01;g__JAHWJK01;s__Unclassified	63.64	497	2543026	497	2543026	36605	6280	2655	0	2956	2404377	813	1.16	63.79	94.55	138649	61.13	5.45	38
MAG731	d__Bacteria;p__Pseudomonadota;c__Alphaproteobacteria;o__Sphingomonadales;f__Sphingomonadaceae;g__Sphingomicrobium;s__Unclassified	65.2	115	1729285	115	1729285	87411	35860	6436	0	1836	1613712	879	1.06	65.41	93.32	115573	62.29	6.68	32
MAG732	d__Bacteria;p__Pseudomonadota;c__Alphaproteobacteria;o__Sphingomonadales;f__Sphingomonadaceae;g__Sphingomicrobium;s__Unclassified	62.81	616	2037029	616	2037029	16112	4707	1492	0	2514	1891818	753	1.23	63.05	92.87	145211	59.69	7.13	46
MAG733	d__Bacteria;p__Chloroflexota;c__Limnocylindria;o__QHBO01;f__QHBO01;g__JACDBZ01;s__Unclassified	69.81	361	1413930	361	1413930	13179	4199	2437	0	1747	1314117	752	1.24	69.93	92.94	99813	68.23	7.06	42
MAG734	d__Bacteria;p__Patescibacteria;c__Microgenomatia;o__Levybacterales;f__UBA12049;g__PRDT01;s__Unclassified	40.74	148	1177138	148	1177138	36163	13308	3268	0	1311	1069104	815	1.11	41.18	90.82	108034	36.39	9.18	42
MAG735	d__Bacteria;p__Pseudomonadota;c__Alphaproteobacteria;o__Sphingomonadales;f__Sphingomonadaceae;g__Sphingomicrobium;s__Unclassified	64.63	269	2127632	269	2127632	41588	10956	3717	0	2298	1979796	862	1.08	64.88	93.05	147836	61.29	6.95	38
MAG736	d__Bacteria;p__Chloroflexota;c__UBA6077;o__UBA6077;f__CF-72;g__Unclassified;s__Unclassified	64.73	896	4405675	896	4405675	27361	6080	2538	0	4788	4114737	859	1.09	64.74	93.4	290938	64.64	6.6	27
MAG737	d__Bacteria;p__Desulfobacterota_B;c__Binatia;o__UBA9968;f__UBA9968;g__WHTF01;s__Unclassified	54.66	2016	5067202	2016	5067202	12577	2697	1529	0	6166	4350792	706	1.22	55.17	85.86	716410	51.54	14.14	42
MAG738	d__Bacteria;p__Bacteroidota;c__Bacteroidia;o__Sphingobacteriales;f__Sphingobacteriaceae;g__Arcticibacter;s__Arcticibacter pallidicorallinus	45.95	1174	2644682	1174	2644682	14237	2500	1244	0	3209	2453514	765	1.21	46.36	92.77	191168	40.7	7.23	36
MAG739	d__Bacteria;p__Pseudomonadota;c__Gammaproteobacteria;o__Burkholderiales;f__SG8-39;g__SCGC-AG-212-J23;s__Unclassified	66.23	825	3476124	825	3476124	24809	5052	2095	0	4322	3352245	776	1.24	66.38	96.44	123879	62.01	3.56	29
MAG74	d__Bacteria;p__Pseudomonadota;c__Gammaproteobacteria;o__Enterobacterales_A;f__Alteromonadaceae;g__Aliidiomarina;s__Unclassified	49.58	187	1833124	187	1833124	58137	14135	4546	0	1832	1693914	925	1	50.1	92.41	139210	43.18	7.59	31
MAG740	d__Bacteria;p__Pseudomonadota;c__Alphaproteobacteria;o__Sphingomonadales;f__Sphingomonadaceae;g__Sphingomicrobium;s__Unclassified	62.3	409	2291281	409	2291281	39812	7245	2750	0	2629	2121969	807	1.15	62.6	92.61	169312	58.5	7.39	42
MAG741	d__Bacteria;p__Chloroflexota;c__Ktedonobacteria;o__Ktedonobacterales;f__JADMIN01;g__JAKAIY01;s__Unclassified	66.82	1510	4432283	1510	4432283	18606	3576	1516	0	4987	3787923	760	1.13	67.2	85.46	644360	64.6	14.54	36
MAG742	d__Bacteria;p__Bacillota;c__Bacilli;o__Erysipelotrichales;f__Erysipelotrichaceae;g__Erysipelothrix;s__Erysipelothrix sp002358955	36.38	139	1272437	139	1272437	75287	13703	4224	0	1287	1166556	906	1.01	36.83	91.68	105881	31.33	8.32	23
MAG743	d__Bacteria;p__Actinomycetota;c__Thermoleophilia;o__Solirubrobacterales;f__70-9;g__Unclassified;s__Unclassified	67.1	25	2542247	25	2542247	382402	166761	41271	0	2534	2359443	931	1	67.41	92.81	182804	63.13	7.19	48
MAG744	d__Bacteria;p__Actinomycetota;c__Actinomycetia;o__Actinomycetales;f__Micrococcaceae;g__Arthrobacter;s__Unclassified	66.22	819	2862878	819	2862878	22112	3782	2057	0	3224	2581557	801	1.13	66.64	90.17	281321	62.36	9.83	31
MAG745	d__Bacteria;p__Gemmatimonadota;c__Gemmatimonadetes;o__Gemmatimonadales;f__Gemmatimonadaceae;g__Fen-1247;s__Unclassified	67.43	857	2508236	857	2508236	13246	3269	1719	0	2924	2337996	800	1.17	67.63	93.21	170240	64.79	6.79	20
MAG746	d__Bacteria;p__Patescibacteria;c__Saccharimonadia;o__Saccharimonadales;f__Saccharimonadaceae;g__Saccharimonas;s__Unclassified	47.79	372	1059494	372	1059494	16570	3696	1238	0	1370	959373	700	1.29	48.46	90.55	100121	41.33	9.45	33
MAG747	d__Bacteria;p__Bacillota;c__Bacilli;o__Lactobacillales;f__Lactobacillaceae;g__Limosilactobacillus;s__Limosilactobacillus oris	50.44	326	1089269	326	1089269	23046	4462	1477	0	1297	955233	736	1.19	51.84	87.69	134036	40.44	12.31	11
MAG748	d__Bacteria;p__Bacteroidota;c__Bacteroidia;o__Chitinophagales;f__UBA10324;g__BJGO01;s__Unclassified	50.84	1282	2719226	1282	2719226	8119	2377	1217	0	3325	2496492	751	1.22	51.43	91.81	222734	44.18	8.19	27
MAG749	d__Bacteria;p__Pseudomonadota;c__Gammaproteobacteria;o__Xanthomonadales;f__Xanthomonadaceae;g__Luteimonas_D;s__Luteimonas_D sp016615955	72.18	639	1688871	639	1688871	16196	3186	1413	0	2083	1572705	755	1.23	72.24	93.12	116166	71.36	6.88	15
MAG75	d__Bacteria;p__Desulfobacterota_B;c__Binatia;o__UBA9968;f__UBA9968;g__DP-20;s__Unclassified	55.83	1221	2968324	1221	2968324	10162	2455	1664	0	3674	2624001	714	1.24	56.48	88.4	344323	50.89	11.6	21
MAG750	d__Bacteria;p__Bacillota;c__Bacilli;o__Bacillales;f__Bacillaceae_H;g__Priestia;s__Priestia megaterium	38.32	919	2748138	919	2748138	16867	3173	1789	0	3453	2339763	678	1.26	39.27	85.14	408375	32.91	14.86	19
MAG751	d__Bacteria;p__Pseudomonadota;c__Gammaproteobacteria;o__Pseudomonadales;f__Spongiibacteraceae;g__Unclassified;s__Unclassified	57.13	28	2959162	28	2959162	375623	175692	54740	0	2762	2665563	965	0.93	57.88	90.08	293599	50.38	9.92	28
MAG752	d__Bacteria;p__Actinomycetota;c__Acidimicrobiia;o__Acidimicrobiales;f__Ilumatobacteraceae;g__Desertimonas;s__Unclassified	71.71	856	2527640	856	2527640	18207	3178	1749	0	2994	2382156	796	1.18	71.64	94.24	145484	72.73	5.76	20
MAG753	d__Bacteria;p__Bacteroidota;c__Bacteroidia;o__Flavobacteriales;f__Flavobacteriaceae;g__Flavobacterium;s__Flavobacterium macacae	36.51	396	2242357	396	2242357	31435	7137	3099	0	2367	2023236	855	1.06	37.42	90.23	219121	28.16	9.77	32
MAG754	d__Bacteria;p__Gemmatimonadota;c__Gemmatimonadetes;o__Gemmatimonadales;f__Gemmatimonadaceae;g__UBA4720;s__Unclassified	60.74	695	2635649	695	2635649	16041	4304	2139	0	2913	2474604	850	1.11	61	93.89	161045	56.76	6.11	22
MAG755	d__Bacteria;p__Patescibacteria;c__Paceibacteria;o__Moranbacterales;f__UBA1568;g__UBA1568;s__Unclassified	41.48	130	654587	130	654587	20773	6641	2585	0	743	604641	814	1.14	41.7	92.37	49946	38.83	7.63	36
MAG756	d__Bacteria;p__Gemmatimonadota;c__Gemmatimonadetes;o__Gemmatimonadales;f__Gemmatimonadaceae;g__JABFXC01;s__Unclassified	69.52	829	2931069	829	2931069	29017	4755	1537	0	3243	2712297	836	1.11	69.77	92.54	218772	66.44	7.46	28
MAG757	d__Bacteria;p__Chloroflexota;c__Limnocylindria;o__Limnocylindrales;f__CSP1-4;g__SPCO01;s__Unclassified	69.7	979	2527200	979	2527200	50831	2926	1356	0	3221	2334399	725	1.27	69.69	92.37	192801	69.72	7.63	27
MAG758	d__Bacteria;p__Bacteroidota;c__Bacteroidia;o__Flavobacteriales;f__Weeksellaceae;g__MFBS3-17;s__Unclassified	42.24	1244	2486312	1244	2486312	13592	2091	1182	0	3141	2271351	723	1.26	43.03	91.35	214961	33.89	8.65	21
MAG759	d__Bacteria;p__Bacillota;c__Bacilli;o__Staphylococcales;f__Salinicoccaceae;g__Jeotgalicoccus;s__Jeotgalicoccus nanhaiensis	42.39	360	1351245	360	1351245	24373	5162	1715	0	1591	1235361	776	1.18	43.13	91.42	115884	34.44	8.58	26
MAG76	d__Bacteria;p__Pseudomonadota;c__Gammaproteobacteria;o__Pseudomonadales;f__Pseudomonadaceae;g__Pseudomonas_E;s__Unclassified	59.99	1279	5020027	1279	5020027	45285	5835	1622	0	5357	4451898	831	1.07	60.77	88.68	568129	53.86	11.32	21
MAG760	d__Bacteria;p__Acidobacteriota;c__Vicinamibacteria;o__Vicinamibacterales;f__2-12-FULL-66-21;g__JACCXG01;s__Unclassified	66.81	1275	3853372	1275	3853372	18103	3287	1815	0	4193	3599127	858	1.09	67.06	93.4	254245	63.17	6.6	15
MAG761	d__Bacteria;p__Actinomycetota;c__Actinomycetia;o__Actinomycetales;f__Cellulomonadaceae;g__Cellulosimicrobium;s__Cellulosimicrobium funkei	75.07	790	2634223	790	2634223	13354	3776	1866	0	2953	2410125	816	1.12	74.97	91.49	224098	76.08	8.51	28
MAG762	d__Bacteria;p__Actinomycetota;c__Actinomycetia;o__Propionibacteriales;f__Nocardioidaceae;g__Nocardioides;s__Unclassified	71.3	905	1997654	905	1997654	8221	2157	1584	0	2652	1846140	696	1.33	71.43	92.42	151514	69.82	7.58	26
MAG763	d__Bacteria;p__Gemmatimonadota;c__Gemmatimonadetes;o__Gemmatimonadales;f__Gemmatimonadaceae;g__JABFXC01;s__Unclassified	68.94	739	2785134	739	2785134	29480	5233	1724	0	3016	2561523	849	1.08	69.2	91.97	223611	65.97	8.03	30
MAG764	d__Bacteria;p__Bacillota;c__Bacilli;o__Staphylococcales;f__Salinicoccaceae;g__Jeotgalicoccus;s__Jeotgalicoccus coquinae	42	543	1774125	543	1774125	21409	4212	1548	0	2199	1608621	732	1.24	42.85	90.67	165504	33.76	9.33	18
MAG765	d__Bacteria;p__Actinomycetota;c__Actinomycetia;o__Mycobacteriales;f__Mycobacteriaceae;g__Corynebacterium;s__Corynebacterium gallinarum	64.1	410	2259758	410	2259758	26496	6923	2810	0	2338	2034495	870	1.03	64.85	90.03	225263	57.27	9.97	38
MAG766	d__Bacteria;p__Acidobacteriota;c__Blastocatellia;o__Pyrinomonadales;f__Pyrinomonadaceae;g__OLB17;s__Unclassified	54.19	1407	3390581	1407	3390581	10713	2773	1321	0	3906	3041697	779	1.15	54.83	89.71	348884	48.56	10.29	34
MAG767	d__Bacteria;p__Pseudomonadota;c__Gammaproteobacteria;o__Burkholderiales;f__Burkholderiaceae_B;g__Ramlibacter;s__Unclassified	70.35	673	3131102	673	3131102	24407	5879	2361	0	3675	2913372	793	1.17	70.49	93.05	217730	68.44	6.95	32
MAG768	d__Bacteria;p__Actinomycetota;c__Thermoleophilia;o__Gaiellales;f__Gaiellaceae;g__JACCRW01;s__Unclassified	71.96	462	2260085	462	2260085	21634	6035	2529	0	2745	2146227	782	1.21	72.14	94.96	113858	68.49	5.04	32
MAG769	d__Bacteria;p__Actinomycetota;c__Actinomycetia;o__Mycobacteriales;f__Mycobacteriaceae;g__Corynebacterium;s__Corynebacterium stationis	53.73	968	2450390	968	2450390	43696	3034	1231	0	3004	2147976	715	1.23	54.42	87.66	302414	48.82	12.34	43
MAG77	d__Bacteria;p__Gemmatimonadota;c__Gemmatimonadetes;o__Gemmatimonadales;f__Gemmatimonadaceae;g__UBA4720;s__Unclassified	59.96	1245	2891251	1245	2891251	17205	2585	1320	0	3605	2719194	754	1.25	60.21	94.05	172057	56.02	5.95	25
MAG770	d__Bacteria;p__Pseudomonadota;c__Alphaproteobacteria;o__Rhodobacterales;f__Rhodobacteraceae;g__Paracoccus;s__Unclassified	69.09	461	3212631	461	3212631	35160	9108	3322	0	3419	2918814	854	1.06	69.29	90.85	293817	67.15	9.15	39
MAG771	d__Bacteria;p__Myxococcota;c__Myxococcia;o__Myxococcales;f__40CM-4-68-19;g__Unclassified;s__Unclassified	72.02	384	3811602	384	3811602	55861	13674	4910	0	3583	3554607	992	0.94	72.05	93.26	256995	71.67	6.74	23
MAG772	d__Bacteria;p__Gemmatimonadota;c__Gemmatimonadetes;o__Gemmatimonadales;f__GWC2-71-9;g__Unclassified;s__Unclassified	71.76	626	2185621	626	2185621	22749	4294	1791	0	2522	2085372	827	1.15	71.86	95.41	100249	69.71	4.59	8
MAG773	d__Archaea;p__Thermoproteota;c__Nitrososphaeria;o__Nitrososphaerales;f__Nitrososphaeraceae;g__Nitrosocosmicus;s__Nitrosocosmicus oleophilus	34.32	827	2170267	827	2170267	11659	2649	1664	0	2898	1686243	582	1.34	35.7	77.7	484024	29.48	22.3	23
MAG774	d__Bacteria;p__Actinomycetota;c__Acidimicrobiia;o__Acidimicrobiales;f__JACDEA01;g__JACDEA01;s__Unclassified	68	703	2485805	703	2485805	21685	4027	1833	0	3110	2389437	768	1.25	68.11	96.12	96368	65.21	3.88	22
MAG775	d__Bacteria;p__Pseudomonadota;c__Gammaproteobacteria;o__Xanthomonadales;f__Xanthomonadaceae;g__Pseudoxanthomonas;s__Unclassified	71.08	704	2283693	704	2283693	15151	3656	1819	0	2625	2066832	787	1.15	71.02	90.5	216861	71.58	9.5	24
MAG776	d__Bacteria;p__Fibrobacterota;c__Fibrobacteria;o__UBA11236;f__UBA11236;g__Chersky-265;s__Unclassified	60.85	1575	3009658	1575	3009658	9540	2022	1167	0	3840	2749959	716	1.28	61.24	91.37	259699	56.68	8.63	31
MAG777	d__Bacteria;p__Actinomycetota;c__Actinomycetia;o__Actinomycetales;f__Micrococcaceae;g__Arthrobacter;s__Unclassified	65.22	557	2185403	557	2185403	27844	4350	2218	0	2481	1990314	802	1.14	65.62	91.07	195089	61.11	8.93	23
MAG778	d__Bacteria;p__Actinomycetota;c__Actinomycetia;o__Actinomycetales;f__Dermatophilaceae;g__Flexivirga;s__Unclassified	67.54	514	2146418	514	2146418	30697	5135	2044	0	2359	1976919	838	1.1	67.78	92.1	169499	64.81	7.9	28
MAG779	d__Bacteria;p__Actinomycetota;c__Thermoleophilia;o__Solirubrobacterales;f__70-9;g__Unclassified;s__Unclassified	71.18	284	2064072	284	2064072	30148	8229	3775	0	2256	1926675	854	1.09	71.21	93.34	137397	70.75	6.66	36
MAG78	d__Bacteria;p__Actinomycetota;c__Actinomycetia;o__Propionibacteriales;f__Propionibacteriaceae;g__Unclassified;s__Unclassified	69.53	221	3876619	221	3876619	122990	36732	8521	0	3811	3591480	942	0.98	69.68	92.64	285139	67.62	7.36	42
MAG780	d__Bacteria;p__Acidobacteriota;c__Blastocatellia;o__Pyrinomonadales;f__Pyrinomonadaceae;g__UBA11740;s__Unclassified	56.95	675	2565054	675	2565054	16440	4797	1982	0	2723	2313846	850	1.06	57.38	90.21	251208	52.97	9.79	18
MAG781	d__Bacteria;p__Pseudomonadota;c__Gammaproteobacteria;o__Pseudomonadales;f__Moraxellaceae;g__Acinetobacter;s__Acinetobacter harbinensis	42.82	554	1573407	554	1573407	17478	3569	1443	0	1845	1387128	752	1.17	43.86	88.16	186279	35.08	11.84	23
MAG782	d__Bacteria;p__Chloroflexota;c__Limnocylindria;o__QHBO01;f__QHBO01;g__JACDBZ01;s__Unclassified	71.15	476	2040754	476	2040754	28993	5088	2101	0	2384	1919640	805	1.17	71.19	94.07	121114	70.56	5.93	26
MAG783	d__Bacteria;p__Bacillota;c__Bacilli;o__Lactobacillales;f__Lactobacillaceae;g__Limosilactobacillus;s__Limosilactobacillus reuteri	38.59	161	1762620	161	1762620	55155	21504	4246	0	1827	1563684	856	1.04	39.44	88.71	198936	31.95	11.29	29
MAG784	d__Bacteria;p__Acidobacteriota;c__Vicinamibacteria;o__Vicinamibacterales;f__2-12-FULL-66-21;g__JACDCA01;s__Unclassified	64.6	576	5041368	576	5041368	53121	12320	3932	0	4752	4697073	988	0.94	64.83	93.17	344295	61.53	6.83	32
MAG785	d__Bacteria;p__Actinomycetota;c__Actinomycetia;o__Propionibacteriales;f__Propionibacteriaceae;g__Arachnia;s__Unclassified	69.18	255	1630964	255	1630964	60183	8926	2867	0	1754	1505118	858	1.08	69.38	92.28	125846	66.86	7.72	22
MAG786	d__Bacteria;p__Bacteroidota;c__Bacteroidia;o__Flavobacteriales;f__Flavobacteriaceae;g__JAJYTI01;s__Unclassified	35.08	179	2209492	179	2209492	116618	22539	5096	0	1983	1917231	967	0.9	36.15	86.77	292261	28.06	13.23	30
MAG787	d__Bacteria;p__Bacillota_A;c__Clostridia;o__Tissierellales;f__Gottschalkiaceae;g__Andreesenia;s__Unclassified	43.51	230	1390247	230	1390247	68957	11873	2226	0	1515	1246491	823	1.09	44.44	89.66	143756	35.46	10.34	26
MAG788	d__Bacteria;p__Pseudomonadota;c__Gammaproteobacteria;o__Burkholderiales;f__Burkholderiaceae_B;g__Rubrivivax_A;s__Unclassified	70.31	1203	2233564	1203	2233564	9825	1937	1199	0	2975	2102469	707	1.33	70.31	94.13	131095	70.18	5.87	8
MAG789	d__Bacteria;p__Chloroflexota;c__Ktedonobacteria;o__Ktedonobacterales;f__JADMIN01;g__JAKAIY01;s__Unclassified	66.89	1009	4309250	1009	4309250	22930	5150	2267	0	4452	3679080	826	1.03	67.28	85.38	630170	64.61	14.62	37
MAG79	d__Bacteria;p__Actinomycetota;c__Actinomycetia;o__Actinomycetales;f__Micrococcaceae;g__Glutamicibacter;s__Glutamicibacter arilaitensis	59.58	452	2583001	452	2583001	38483	9732	2300	0	2714	2307258	850	1.05	60.38	89.32	275743	52.9	10.68	42
MAG790	d__Bacteria;p__Deinococcota;c__Deinococci;o__Deinococcales;f__Deinococcaceae;g__Deinococcus;s__Unclassified	68.32	654	2629817	654	2629817	22473	5333	1956	0	2983	2361525	792	1.13	68.91	89.8	268292	63.12	10.2	50
MAG791	d__Bacteria;p__Pseudomonadota;c__Alphaproteobacteria;o__Sphingomonadales;f__Sphingomonadaceae;g__Allosphingosinicella;s__Unclassified	68.79	622	2403030	622	2403030	16341	4522	2141	0	2985	2239899	750	1.24	69.1	93.21	163131	64.57	6.79	32
MAG792	d__Bacteria;p__Patescibacteria;c__Microgenomatia;o__Levybacterales;f__GWA1-39-11;g__JAGORM01;s__Unclassified	36.87	717	1704415	717	1704415	18766	2768	1243	0	2220	1516476	683	1.3	37.4	88.97	187939	32.53	11.03	45
MAG793	d__Archaea;p__Thermoproteota;c__Nitrososphaeria;o__Nitrososphaerales;f__Nitrososphaeraceae;g__Nitrosocosmicus;s__Nitrosocosmicus oleophilus	33.8	616	2241677	616	2241677	18188	4152	2007	0	2819	1618950	574	1.26	35.35	72.22	622727	29.75	27.78	23
MAG794	d__Bacteria;p__Pseudomonadota;c__Gammaproteobacteria;o__Pseudomonadales;f__Pseudomonadaceae;g__Thiopseudomonas;s__Unclassified	54.94	487	2056493	487	2056493	28188	6035	1828	0	2299	1847820	804	1.12	55.51	89.85	208673	49.85	10.15	36
MAG795	d__Bacteria;p__Acidobacteriota;c__Blastocatellia;o__Pyrinomonadales;f__Pyrinomonadaceae;g__UBA11740;s__Unclassified	54.61	343	3900765	343	3900765	53673	16974	5368	0	3595	3592134	999	0.92	55	92.09	308631	50.06	7.91	40
MAG796	d__Bacteria;p__Bacteroidota;c__Bacteroidia;o__Flavobacteriales;f__Flavobacteriaceae;g__JAAYLC01;s__Unclassified	36.38	510	2286592	510	2286592	19533	5293	2264	0	2480	2062038	831	1.08	37.17	90.18	224554	29.13	9.82	29
MAG797	d__Bacteria;p__Bacillota;c__Bacilli;o__Lactobacillales;f__Lactobacillaceae;g__Ligilactobacillus;s__Ligilactobacillus salivarius	32.68	300	1527701	300	1527701	53238	7386	2174	0	1658	1335939	806	1.09	33.32	87.45	191762	28.2	12.55	24
MAG798	d__Bacteria;p__Nitrospirota;c__Nitrospiria;o__Nitrospirales;f__Nitrospiraceae;g__Unclassified;s__Unclassified	56.41	1982	2932961	1982	2932961	4969	1453	1063	0	4369	2556393	585	1.49	56.74	87.16	376568	54.19	12.84	47
MAG799	d__Bacteria;p__Pseudomonadota;c__Alphaproteobacteria;o__Rhizobiales;f__Xanthobacteraceae;g__PALSA-894;s__Unclassified	66.46	1172	3666833	1172	3666833	18532	3472	1892	0	4481	3301890	737	1.22	66.87	90.05	364943	62.75	9.95	23
MAG8	d__Bacteria;p__Cyanobacteriota;c__Cyanobacteriia;o__Cyanobacteriales;f__Microcoleaceae;g__Microcoleus;s__Unclassified	46.11	3042	4272780	3042	4272780	6655	1375	1056	0	5647	3532575	626	1.32	47.03	82.68	740205	41.71	17.32	44
MAG80	d__Bacteria;p__Actinomycetota;c__Thermoleophilia;o__Solirubrobacterales;f__70-9;g__JAJKHV01;s__Unclassified	68.83	67	2785303	67	2785303	284100	120827	27548	0	2740	2587998	945	0.98	69.23	92.92	197305	63.59	7.08	48
MAG800	d__Bacteria;p__Bacteroidota;c__Bacteroidia;o__Flavobacteriales;f__Flavobacteriaceae;g__Flavobacterium;s__Unclassified	37.72	118	2579997	118	2579997	101770	42526	11529	0	2371	2249904	949	0.92	38.5	87.21	330093	32.36	12.79	47
MAG801	d__Bacteria;p__Actinomycetota;c__Actinomycetia;o__Mycobacteriales;f__Mycobacteriaceae;g__Gordonia;s__Unclassified	70.11	502	2856542	502	2856542	25160	7197	2771	0	2999	2671998	891	1.05	70.35	93.54	184544	66.58	6.46	23
MAG802	d__Bacteria;p__Actinomycetota;c__Actinomycetia;o__Actinomycetales;f__Micrococcaceae;g__Arthrobacter;s__Arthrobacter equi	66.8	1782	3242011	1782	3242011	7973	1866	1142	0	4294	2931306	683	1.32	67.19	90.42	310705	63.16	9.58	38
MAG803	d__Bacteria;p__Nitrospirota;c__Nitrospiria;o__Nitrospirales;f__Nitrospiraceae;g__Nitrospira_F;s__Unclassified	54.08	882	1699360	882	1699360	7539	1964	1254	0	2337	1500372	642	1.38	54.64	88.29	198988	49.87	11.71	12
MAG804	d__Bacteria;p__Actinomycetota;c__Actinomycetia;o__Propionibacteriales;f__Propionibacteriaceae;g__Arachnia;s__Unclassified	70.13	282	3093620	282	3093620	59982	16507	5074	0	3122	2847828	912	1.01	70.52	92.05	245792	65.58	7.95	48
MAG805	d__Bacteria;p__Actinomycetota;c__Actinomycetia;o__Actinomycetales;f__Microbacteriaceae;g__Agromyces;s__Unclassified	69.31	540	2799369	540	2799369	25545	6489	2646	0	3053	2566446	841	1.09	69.49	91.68	232923	67.31	8.32	35
MAG806	d__Bacteria;p__Actinomycetota;c__Actinomycetia;o__Actinomycetales;f__Micrococcaceae;g__Kocuria;s__Unclassified	73.93	746	2184785	746	2184785	9906	3097	1760	0	2499	1977210	791	1.14	73.76	90.5	207575	75.54	9.5	23
MAG807	d__Bacteria;p__Pseudomonadota;c__Gammaproteobacteria;o__Burkholderiales;f__Casimicrobiaceae;g__VBCG01;s__Unclassified	69.95	890	2235365	890	2235365	10109	2552	1663	0	2793	2060316	738	1.25	69.97	92.17	175049	69.68	7.83	20
MAG808	d__Bacteria;p__Pseudomonadota;c__Gammaproteobacteria;o__Xanthomonadales;f__Rhodanobacteraceae;g__Unclassified;s__Unclassified	63.51	688	1642521	688	1642521	11881	2645	1382	0	2025	1511703	747	1.23	63.65	92.04	130818	61.91	7.96	23
MAG809	d__Bacteria;p__Actinomycetota;c__Actinomycetia;o__Mycobacteriales;f__Mycobacteriaceae;g__Corynebacterium;s__Unclassified	65.77	144	3388026	144	3388026	158611	61459	16049	0	3258	3119925	958	0.96	66.17	92.09	268101	61.1	7.91	47
MAG81	d__Bacteria;p__Actinomycetota;c__Actinomycetia;o__Actinomycetales;f__JAHECE01;g__JAHECE01;s__Unclassified	74.74	699	2455342	699	2455342	23798	3952	1896	0	2741	2248662	820	1.12	74.62	91.58	206680	76.04	8.42	32
MAG810	d__Bacteria;p__Patescibacteria;c__Saccharimonadia;o__Saccharimonadales;f__UBA10212;g__JACDFN01;s__Unclassified	47.54	167	721307	167	721307	18694	6046	2056	0	856	657612	768	1.19	48.22	91.17	63695	40.56	8.83	33
MAG811	d__Bacteria;p__Actinomycetota;c__Actinomycetia;o__Propionibacteriales;f__Propionibacteriaceae;g__Raineyella;s__Unclassified	70.06	947	2297631	947	2297631	17935	2881	1236	0	2897	2117157	731	1.26	70.16	92.15	180474	68.81	7.85	28
MAG812	d__Bacteria;p__Pseudomonadota;c__Gammaproteobacteria;o__Burkholderiales;f__Nitrosomonadaceae;g__Nitrosospira;s__Nitrosospira multiformis_D	52.8	398	1365485	398	1365485	11361	3671	2106	0	1547	1193991	772	1.13	53.78	87.44	171494	46.03	12.56	14
MAG813	d__Bacteria;p__Pseudomonadota;c__Alphaproteobacteria;o__Sphingomonadales;f__Sphingomonadaceae;g__Sphingomicrobium;s__Unclassified	61.56	285	3140096	285	3140096	74416	23729	3950	0	3340	2877732	862	1.06	61.8	91.64	262364	58.91	8.36	49
MAG814	d__Bacteria;p__Verrucomicrobiota;c__Verrucomicrobiae;o__Chthoniobacterales;f__UBA10450;g__CADDYX01;s__Unclassified	60.6	970	1512151	970	1512151	6455	1552	1073	0	2181	1434849	658	1.44	60.7	94.89	77302	58.79	5.11	24
MAG815	d__Bacteria;p__Bacteroidota;c__Bacteroidia;o__Chitinophagales;f__Chitinophagaceae;g__JAFAGI01;s__JAFAGI01 sp023386235	38.54	151	2870977	151	2870977	135721	30888	9049	0	2632	2620899	996	0.92	39.51	91.29	250078	28.34	8.71	36
MAG816	d__Bacteria;p__Bacteroidota;c__Bacteroidia;o__Chitinophagales;f__Chitinophagaceae;g__Ferruginibacter;s__Unclassified	44.09	749	2561624	749	2561624	16187	4226	1795	0	2719	2360949	868	1.06	44.69	92.17	200675	37.03	7.83	23
MAG817	d__Bacteria;p__Pseudomonadota;c__Gammaproteobacteria;o__Enterobacterales;f__Enterobacteriaceae;g__Escherichia;s__Escherichia coli	51.06	887	3614778	887	3614778	32360	6031	1763	0	4011	3198927	798	1.11	52.1	88.5	415851	43.09	11.5	73
MAG818	d__Bacteria;p__Chloroflexota;c__UBA5177;o__Unclassified;f__Unclassified;g__Unclassified;s__Unclassified	64.43	1859	3675496	1859	3675496	9606	2113	1219	0	4854	3256161	671	1.32	65.11	88.59	419335	59.08	11.41	22
MAG819	d__Bacteria;p__Actinomycetota;c__Actinomycetia;o__Actinomycetales;f__Microbacteriaceae;g__Agrococcus;s__Unclassified	64.58	229	1983207	229	1983207	86368	14448	3712	0	2040	1825953	895	1.03	64.91	92.07	157254	60.7	7.93	14
MAG82	d__Bacteria;p__Actinomycetota;c__Actinomycetia;o__Actinomycetales;f__Micrococcaceae;g__Arthrobacter;s__Arthrobacter oxydans	66.33	1177	3227570	1177	3227570	22096	3164	1479	0	3902	2926644	750	1.21	66.73	90.68	300926	62.45	9.32	36
MAG820	d__Bacteria;p__Pseudomonadota;c__Gammaproteobacteria;o__Burkholderiales;f__Burkholderiaceae_C;g__JAJYRX01;s__Unclassified	54.8	326	1576705	326	1576705	21008	5647	2657	0	1673	1470432	879	1.06	55.32	93.26	106273	47.59	6.74	11
MAG821	d__Bacteria;p__Acidobacteriota;c__Blastocatellia;o__Pyrinomonadales;f__Pyrinomonadaceae;g__QHXN01;s__Unclassified	66.11	1346	5616406	1346	5616406	19413	5344	2105	0	5603	5066418	904	1	66.98	90.21	549988	58.08	9.79	51
MAG822	d__Bacteria;p__Actinomycetota;c__Actinomycetia;o__Actinomycetales;f__Micrococcaceae;g__Kocuria;s__Unclassified	73.82	664	2027742	664	2027742	14652	3252	1789	0	2272	1846098	813	1.12	73.66	91.04	181644	75.46	8.96	28
MAG823	d__Bacteria;p__Acidobacteriota;c__Blastocatellia;o__Pyrinomonadales;f__Pyrinomonadaceae;g__OLB17;s__Unclassified	54.09	915	3153187	915	3153187	15361	3817	1935	0	3422	2835732	829	1.09	54.74	89.93	317455	48.29	10.07	28
MAG824	d__Bacteria;p__Actinomycetota;c__Actinomycetia;o__Mycobacteriales;f__Mycobacteriaceae;g__Corynebacterium;s__Unclassified	65.35	579	2209358	579	2209358	21025	4363	2016	0	2419	1946397	805	1.09	66.03	88.1	262961	60.29	11.9	40
MAG825	d__Bacteria;p__Actinomycetota;c__Actinomycetia;o__Actinomycetales;f__Micrococcaceae;g__Glutamicibacter;s__Glutamicibacter arilaitensis	59.79	488	2349020	488	2349020	26704	5643	2578	0	2551	2103510	825	1.09	60.6	89.55	245510	52.86	10.45	36
MAG826	d__Bacteria;p__Dormibacterota;c__Dormibacteria;o__Dormibacterales;f__Dormibacteraceae;g__CF-28;s__Unclassified	71.39	423	2563539	423	2563539	40080	8213	2929	0	2865	2417073	844	1.12	71.49	94.29	146466	69.75	5.71	29
MAG827	d__Bacteria;p__Armatimonadota;c__DTGP01;o__Unclassified;f__Unclassified;g__Unclassified;s__Unclassified	67.49	1007	3209192	1007	3209192	15419	4019	1579	0	3545	2911368	821	1.1	67.58	90.72	297824	66.67	9.28	39
MAG828	d__Bacteria;p__Pseudomonadota;c__Alphaproteobacteria;o__Sphingomonadales;f__Sphingomonadaceae;g__Sphingomicrobium;s__Unclassified	61.03	604	1716661	604	1716661	18362	3351	1438	0	2236	1586889	710	1.3	61.25	92.44	129772	58.31	7.56	31
MAG829	d__Bacteria;p__Gemmatimonadota;c__Gemmatimonadetes;o__Gemmatimonadales;f__Gemmatimonadaceae;g__JADGGM01;s__Unclassified	66.68	931	3195754	931	3195754	14167	3908	1954	0	3579	2922717	817	1.12	66.93	91.46	273037	64.01	8.54	33
MAG83	d__Bacteria;p__Actinomycetota;c__Actinomycetia;o__Actinomycetales;f__Micrococcaceae;g__Arthrobacter;s__Unclassified	64.75	590	2868943	590	2868943	41159	6720	2278	0	3187	2568021	806	1.11	65.22	89.51	300922	60.78	10.49	38
MAG830	d__Bacteria;p__Acidobacteriota;c__Thermoanaerobaculia;o__Gp7-AA8;f__Gp7-AA8;g__QHVT01;s__Unclassified	66.6	1017	4909602	1017	4909602	24771	5979	2433	0	4826	4492614	931	0.98	66.88	91.51	416988	63.6	8.49	36
MAG831	d__Bacteria;p__Bacteroidota;c__Bacteroidia;o__Chitinophagales;f__Chitinophagaceae;g__VBAS01;s__Unclassified	38.59	1183	3568758	1183	3568758	13400	3240	1785	0	3957	3277785	828	1.11	39.01	91.85	290973	33.78	8.15	20
MAG832	d__Bacteria;p__Bacteroidota;c__Bacteroidia;o__Chitinophagales;f__Chitinophagaceae;g__Segetibacter;s__Unclassified	40	126	3486022	126	3486022	130834	48363	13237	0	3225	3182346	987	0.93	40.52	91.29	303676	34.62	8.71	32
MAG833	d__Bacteria;p__Gemmatimonadota;c__Gemmatimonadetes;o__Gemmatimonadales;f__Gemmatimonadaceae;g__JADGGM01;s__Unclassified	66.93	1153	3278061	1153	3278061	21208	3283	1551	0	3784	3010833	796	1.15	67.14	91.85	267228	64.49	8.15	29
MAG834	d__Bacteria;p__Chloroflexota;c__Anaerolineae;o__Anaerolineales;f__EnvOPS12;g__UBA12294;s__Unclassified	52.9	948	3341010	948	3341010	16381	3743	2125	0	3918	3046623	778	1.17	53.63	91.19	294387	45.4	8.81	32
MAG835	d__Bacteria;p__Actinomycetota;c__Actinomycetia;o__Actinomycetales;f__Brevibacteriaceae;g__Brevibacterium;s__Brevibacterium yomogidense_A	69.02	971	2155231	971	2155231	7196	2326	1378	0	2614	1964745	752	1.21	69.21	91.16	190486	67.16	8.84	25
MAG836	d__Bacteria;p__Actinomycetota;c__Actinomycetia;o__Actinomycetales;f__Microbacteriaceae;g__Microbacterium;s__Microbacterium pullistercoris	68.84	491	2286634	491	2286634	44839	5936	2160	0	2550	2131563	836	1.12	69.06	93.22	155071	65.78	6.78	33
MAG837	d__Bacteria;p__Bacteroidota;c__Bacteroidia;o__Chitinophagales;f__Chitinophagaceae;g__Flavitalea;s__Flavitalea sp023437225	44.06	193	3920184	193	3920184	110907	32678	10813	0	3456	3671361	1062	0.88	44.49	93.65	248823	37.69	6.35	35
MAG838	d__Bacteria;p__Patescibacteria;c__Saccharimonadia;o__Saccharimonadales;f__UBA10212;g__JAIFWC01;s__Unclassified	42.21	44	768043	44	768043	104819	31288	7059	0	819	698721	853	1.07	42.65	90.97	69322	37.74	9.03	31
MAG839	d__Bacteria;p__Bacteroidota;c__Bacteroidia;o__Flavobacteriales;f__Weeksellaceae;g__Kaistella;s__Kaistella beijingensis	36.8	544	1442129	544	1442129	16688	2642	1681	0	1769	1291863	730	1.23	37.74	89.58	150266	28.76	10.42	12
MAG84	d__Archaea;p__Thermoproteota;c__Nitrososphaeria;o__Nitrososphaerales;f__Nitrososphaeraceae;g__Nitrosocosmicus;s__Nitrosocosmicus oleophilus	33.9	866	2769077	866	2769077	19398	4074	1608	0	3440	2044518	594	1.24	35.4	73.83	724559	29.65	26.17	20
MAG840	d__Bacteria;p__Dormibacterota;c__Dormibacteria;o__Dormibacterales;f__Dormibacteraceae;g__CF-161;s__Unclassified	67.58	550	3556235	550	3556235	44106	8394	3101	0	4076	3198711	785	1.15	67.8	89.95	357524	65.62	10.05	40
MAG841	d__Bacteria;p__Bacillota;c__Bacilli;o__Lactobacillales;f__Lactobacillaceae;g__Limosilactobacillus;s__Limosilactobacillus vaginalis	41.17	83	985948	83	985948	67366	19633	5509	0	942	871041	925	0.96	42.02	88.35	114907	34.78	11.65	14
MAG842	d__Bacteria;p__Actinomycetota;c__Actinomycetia;o__Mycobacteriales;f__Mycobacteriaceae;g__Corynebacterium;s__Corynebacterium glutamicum	54.53	271	1883464	271	1883464	33740	7777	3903	0	1938	1693047	874	1.03	55.39	89.89	190417	46.86	10.11	20
MAG843	d__Bacteria;p__Pseudomonadota;c__Alphaproteobacteria;o__Acetobacterales;f__Acetobacteraceae;g__Unclassified;s__Unclassified	67.44	1010	3507279	1010	3507279	18591	3799	1982	0	4206	3203982	762	1.2	67.7	91.35	303297	64.72	8.65	41
MAG844	d__Bacteria;p__Bacteroidota;c__Bacteroidia;o__Chitinophagales;f__Chitinophagaceae;g__Hanamia;s__Unclassified	36.74	794	2956473	794	2956473	21348	4324	1942	0	3178	2665707	839	1.07	37.7	90.17	290766	27.92	9.83	29
MAG845	d__Bacteria;p__Actinomycetota;c__Actinomycetia;o__Actinomycetales;f__Micrococcaceae;g__Arthrobacter;s__Arthrobacter oxydans	66.56	623	3601792	623	3601792	72888	7663	2843	0	3763	3275883	871	1.04	66.97	90.95	325909	62.41	9.05	48
MAG846	d__Bacteria;p__Bacillota;c__Bacilli;o__Lactobacillales;f__Lactobacillaceae;g__Lactobacillus;s__Lactobacillus gallinarum	36.18	175	1327527	175	1327527	52041	10112	3619	0	1430	1195806	836	1.08	36.9	90.08	131721	29.64	9.92	34
MAG847	d__Bacteria;p__Gemmatimonadota;c__Gemmatimonadetes;o__Longimicrobiales;f__Longimicrobiaceae;g__Longimicrobium;s__Unclassified	70.44	951	6671096	951	6671096	51542	9495	3376	0	6208	5516295	889	0.93	71.37	82.69	1154801	65.99	17.31	51
MAG848	d__Bacteria;p__Pseudomonadota;c__Gammaproteobacteria;o__Xanthomonadales;f__Rhodanobacteraceae;g__66-474;s__Unclassified	65.68	622	2150569	622	2150569	24610	4484	1610	0	2340	1903734	814	1.09	65.9	88.52	246835	63.95	11.48	26
MAG849	d__Bacteria;p__Chloroflexota;c__Anaerolineae;o__Anaerolineales;f__EnvOPS12;g__UBA12294;s__Unclassified	55.92	836	3362589	836	3362589	27940	4405	2302	0	3748	3046164	813	1.11	56.85	90.59	316425	46.97	9.41	24
MAG85	d__Bacteria;p__Bacteroidota;c__Bacteroidia;o__Bacteroidales;f__Dysgonomonadaceae;g__JAAYFB01;s__Unclassified	40.28	537	1827682	537	1827682	18214	3996	1854	0	1958	1658124	847	1.07	41.35	90.72	169558	29.8	9.28	32
MAG850	d__Bacteria;p__Actinomycetota;c__Actinomycetia;o__Mycobacteriales;f__Mycobacteriaceae;g__Dietzia;s__Dietzia aurantiaca	70.24	414	2772835	414	2772835	64817	10328	2952	0	2864	2540571	887	1.03	70.39	91.62	232264	68.63	8.38	49
MAG851	d__Bacteria;p__Pseudomonadota;c__Alphaproteobacteria;o__Sphingomonadales;f__Sphingomonadaceae;g__Sphingomicrobium;s__Unclassified	62.74	713	1938723	713	1938723	16107	3331	1324	0	2492	1798239	722	1.29	62.97	92.75	140484	59.73	7.25	37
MAG852	d__Bacteria;p__Pseudomonadota;c__Gammaproteobacteria;o__Xanthomonadales;f__Rhodanobacteraceae;g__Oleiagrimonas;s__Unclassified	63.99	52	3209343	52	3209343	347032	109073	24229	0	2862	2911200	1017	0.89	64.53	90.71	298143	58.69	9.29	43
MAG853	d__Bacteria;p__Bacillota;c__Bacilli;o__Bacillales_K;f__Sporolactobacillaceae;g__Unclassified;s__Unclassified	40.33	557	1382278	557	1382278	20733	2492	1551	0	1723	1181595	686	1.25	40.85	85.48	200683	37.26	14.52	7
MAG854	d__Bacteria;p__Actinomycetota;c__Actinomycetia;o__JACCUZ01;f__JACCUZ01;g__Unclassified;s__Unclassified	72.58	852	2428322	852	2428322	23388	3689	1379	0	2926	2248935	769	1.2	72.64	92.61	179387	71.81	7.39	11
MAG855	d__Bacteria;p__Actinomycetota;c__Thermoleophilia;o__Gaiellales;f__Gaiellaceae;g__VAXT01;s__Unclassified	68.37	463	1678479	463	1678479	21273	4191	1992	0	2100	1583238	754	1.25	68.53	94.33	95241	65.63	5.67	22
MAG856	d__Bacteria;p__Pseudomonadota;c__Alphaproteobacteria;o__Sphingomonadales;f__Sphingomonadaceae;g__Aquisediminimonas;s__Unclassified	62	683	1721842	683	1721842	13907	3040	1283	0	2298	1608366	700	1.33	62.18	93.41	113476	59.52	6.59	24
MAG857	d__Bacteria;p__Bacteroidota;c__Bacteroidia;o__Chitinophagales;f__Chitinophagaceae;g__Parasegetibacter;s__Unclassified	44.53	1705	2367515	1705	2367515	3984	1350	1050	0	3345	2176695	651	1.41	44.99	91.94	190820	39.33	8.06	40
MAG858	d__Bacteria;p__Cyanobacteriota;c__Cyanobacteriia;o__Cyanobacteriales;f__Chroococcidiopsidaceae;g__Chroococcidiopsis;s__Unclassified	44.51	1399	3288014	1399	3288014	7684	2542	1463	0	3970	2769951	698	1.21	45.44	84.24	518063	39.59	15.76	26
MAG859	d__Bacteria;p__Patescibacteria;c__Saccharimonadia;o__Saccharimonadales;f__UBA4665;g__Unclassified;s__Unclassified	52.42	75	839799	75	839799	78745	25111	4524	0	960	744096	775	1.14	53.17	88.6	95703	46.58	11.4	32
MAG86	d__Bacteria;p__Actinomycetota;c__Actinomycetia;o__Actinomycetales;f__Microbacteriaceae;g__Microbacterium;s__Microbacterium pullistercoris	68.67	604	2120777	604	2120777	14504	4036	1908	0	2438	1976439	811	1.15	68.89	93.19	144338	65.66	6.81	36
MAG860	d__Bacteria;p__Pseudomonadota;c__Gammaproteobacteria;o__Pseudomonadales;f__Pseudomonadaceae;g__Thiopseudomonas;s__Thiopseudomonas sp012800475	49.62	224	1483151	224	1483151	25941	8127	3365	0	1545	1344009	870	1.04	50.09	90.62	139142	45.09	9.38	21
MAG861	d__Bacteria;p__Tectomicrobia;c__Entotheonellia;o__Entotheonellales;f__Entotheonellaceae;g__SXND01;s__Unclassified	59.39	1604	5224204	1604	5224204	16346	3551	1943	0	6113	4512006	738	1.17	59.78	86.37	712198	56.95	13.63	37
MAG862	d__Bacteria;p__Pseudomonadota;c__Alphaproteobacteria;o__Sphingomonadales;f__Sphingomonadaceae;g__Allosphingosinicella;s__Unclassified	69.5	757	2718381	757	2718381	20345	4052	1937	0	3388	2467371	728	1.25	69.82	90.77	251010	66.29	9.23	34
MAG863	d__Bacteria;p__Bacillota;c__Bacilli;o__Bacillales;f__Planococcaceae;g__Sporosarcina;s__Sporosarcina sp003351785	40.74	324	2888513	324	2888513	44611	12486	4203	0	2960	2509620	848	1.02	41.15	86.88	378893	37.99	13.12	17
MAG864	d__Bacteria;p__Bacteroidota;c__Bacteroidia;o__Cytophagales;f__Hymenobacteraceae;g__Hymenobacter;s__Unclassified	60.19	626	3721012	626	3721012	25901	8361	2819	0	3801	3217131	846	1.02	61.33	86.46	503881	52.88	13.54	34
MAG865	d__Bacteria;p__Actinomycetota;c__Actinomycetia;o__Actinomycetales;f__Brevibacteriaceae;g__Brevibacterium;s__Brevibacterium intestinigallinarum	70.74	603	2628586	603	2628586	42850	6155	1856	0	2750	2422740	881	1.05	70.91	92.17	205846	68.76	7.83	36
MAG866	d__Bacteria;p__Actinomycetota;c__Thermoleophilia;o__Solirubrobacterales;f__70-9;g__VAYN01;s__Unclassified	69.19	34	2776791	34	2776791	310389	177023	45433	0	2739	2591715	946	0.99	69.67	93.33	185076	62.6	6.67	51
MAG867	d__Bacteria;p__Bacillota;c__Bacilli;o__Staphylococcales;f__Salinicoccaceae;g__Aliicoccus;s__Unclassified	39.1	297	1095351	297	1095351	22887	4241	2117	0	1286	1007355	783	1.17	39.53	91.97	87996	34.22	8.03	10
MAG868	d__Bacteria;p__Pseudomonadota;c__Alphaproteobacteria;o__Rhodobacterales;f__Rhodobacteraceae;g__Paracoccus;s__Unclassified	62.85	686	1855707	686	1855707	12245	2802	1685	0	2384	1716525	720	1.28	63.15	92.5	139182	59.17	7.5	17
MAG869	d__Bacteria;p__Bacteroidota;c__Bacteroidia;o__Flavobacteriales;f__Flavobacteriaceae;g__JAJYTI01;s__Unclassified	35.64	345	2011244	345	2011244	64215	6672	3112	0	1973	1776303	900	0.98	36.62	88.32	234941	28.23	11.68	28
MAG87	d__Bacteria;p__Cyanobacteriota;c__Cyanobacteriia;o__Cyanobacteriales;f__Xenococcaceae;g__Waterburya;s__Unclassified	39.64	872	4485664	872	4485664	29586	6344	2624	0	4668	3712137	795	1.04	40.93	82.76	773527	33.47	17.24	35
MAG870	d__Bacteria;p__Actinomycetota;c__Actinomycetia;o__Propionibacteriales;f__Propionibacteriaceae;g__Aestuariimicrobium;s__Unclassified	69.09	290	2816608	290	2816608	69780	15260	4119	0	2804	2615382	933	1	69.26	92.86	201226	66.78	7.14	34
MAG871	d__Bacteria;p__Actinomycetota;c__Thermoleophilia;o__Solirubrobacterales;f__70-9;g__RHKX01;s__Unclassified	70.97	556	2461728	556	2461728	19853	5483	2236	0	2900	2303841	794	1.18	71.08	93.59	157887	69.25	6.41	36
MAG872	d__Bacteria;p__Actinomycetota;c__Actinomycetia;o__Actinomycetales;f__Actinomycetaceae;g__Scrofimicrobium;s__Unclassified	57.34	342	2461109	342	2461109	62000	9916	3278	0	2432	2219349	913	0.99	57.6	90.18	241760	54.95	9.82	33
MAG873	d__Bacteria;p__Actinomycetota;c__Actinomycetia;o__Propionibacteriales;f__Propionibacteriaceae;g__Aestuariimicrobium;s__Aestuariimicrobium sp017355265	68.96	449	2604438	449	2604438	34847	8336	2575	0	2740	2414367	881	1.05	69.12	92.7	190071	66.97	7.3	42
MAG874	d__Bacteria;p__Chloroflexota;c__Chloroflexia;o__Thermomicrobiales;f__UBA6265;g__UBA6265;s__Unclassified	55.75	310	3096752	310	3096752	64404	19150	4116	0	3056	2825994	925	0.99	56.14	91.26	270758	51.74	8.74	44
MAG875	d__Bacteria;p__Actinomycetota;c__Thermoleophilia;o__Gaiellales;f__Gaiellaceae;g__JACCRW01;s__Unclassified	71.89	355	2223383	355	2223383	53141	8087	3088	0	2638	2109390	800	1.19	72.09	94.87	113993	68.25	5.13	35
MAG876	d__Bacteria;p__Pseudomonadota;c__Alphaproteobacteria;o__Sphingomonadales;f__Sphingomonadaceae;g__Allosphingosinicella;s__Unclassified	68.39	301	3880597	301	3880597	129637	22368	6424	0	3876	3457554	892	1	68.85	89.1	423043	64.67	10.9	51
MAG877	d__Bacteria;p__Pseudomonadota;c__Alphaproteobacteria;o__Sphingomonadales;f__Sphingomonadaceae;g__Sphingomicrobium;s__Unclassified	66.15	353	1712857	353	1712857	48111	5884	2422	0	2040	1609125	789	1.19	66.45	93.94	103732	61.53	6.06	26
MAG878	d__Bacteria;p__Pseudomonadota;c__Alphaproteobacteria;o__Rhodobacterales;f__Rhodobacteraceae;g__Paracoccus;s__Unclassified	65.54	1182	2306849	1182	2306849	11577	2048	1176	0	3170	2118291	668	1.37	65.79	91.83	188558	62.78	8.17	19
MAG879	d__Bacteria;p__Acidobacteriota;c__Vicinamibacteria;o__Vicinamibacterales;f__2-12-FULL-66-21;g__2-12-FULL-66-21;s__Unclassified	69.96	336	4231387	336	4231387	81015	23018	5347	0	3825	3942075	1031	0.9	70.13	93.16	289312	67.58	6.84	36
MAG88	d__Bacteria;p__Actinomycetota;c__Actinomycetia;o__Mycobacteriales;f__Jatrophihabitantaceae;g__Jatrophihabitans;s__Unclassified	68.88	463	1671030	463	1671030	10551	3788	2320	0	2019	1571262	778	1.21	69.1	94.03	99768	65.32	5.97	12
MAG880	d__Bacteria;p__Bacteroidota;c__Bacteroidia;o__Chitinophagales;f__Chitinophagaceae;g__Hanamia;s__Unclassified	38.1	653	2835473	653	2835473	25431	6205	2019	0	2830	2504022	885	1	39.1	88.31	331451	30.56	11.69	25
MAG881	d__Bacteria;p__Actinomycetota;c__Actinomycetia;o__Actinomycetales;f__Micrococcaceae;g__Nesterenkonia;s__Unclassified	64.95	681	1930783	681	1930783	20774	3431	1424	0	2362	1783302	755	1.22	65.26	92.36	147481	61.15	7.64	33
MAG882	d__Bacteria;p__Actinomycetota;c__Actinomycetia;o__Actinomycetales;f__Microbacteriaceae;g__Microbacterium;s__Unclassified	71.42	369	2642443	369	2642443	103047	11317	3127	0	2760	2482785	900	1.04	71.57	93.96	159658	69.14	6.04	49
MAG883	d__Bacteria;p__Actinomycetota;c__Thermoleophilia;o__Solirubrobacterales;f__70-9;g__VAYN01;s__Unclassified	68.99	129	2656666	129	2656666	90470	33962	10649	0	2815	2454780	872	1.06	69.47	92.4	201886	63.19	7.6	51
MAG884	d__Bacteria;p__Pseudomonadota;c__Gammaproteobacteria;o__Pseudomonadales;f__Moraxellaceae;g__Acinetobacter;s__Unclassified	38.54	368	2429374	368	2429374	35040	8222	3322	0	2471	2111697	855	1.02	39.81	86.92	317677	30.14	13.08	44
MAG885	d__Bacteria;p__Actinomycetota;c__Actinomycetia;o__Actinomycetales;f__Dermatophilaceae;g__Flexivirga;s__Unclassified	67.59	582	2303788	582	2303788	36423	4447	2011	0	2601	2115528	813	1.13	67.83	91.83	188260	64.86	8.17	30
MAG886	d__Bacteria;p__Actinomycetota;c__Actinomycetia;o__Mycobacteriales;f__Mycobacteriaceae;g__Corynebacterium;s__Corynebacterium casei	55.84	499	1281761	499	1281761	11125	2998	1378	0	1483	1146990	773	1.16	56.68	89.49	134771	48.65	10.51	22
MAG887	d__Bacteria;p__Bacillota;c__Bacilli;o__Staphylococcales;f__Salinicoccaceae;g__Jeotgalicoccus;s__Unclassified	41.25	693	1120503	693	1120503	7525	1603	1102	0	1604	1028076	641	1.43	41.96	91.75	92427	33.39	8.25	11
MAG888	d__Bacteria;p__Pseudomonadota;c__Alphaproteobacteria;o__Rhizobiales;f__Xanthobacteraceae;g__Bradyrhizobium;s__Unclassified	64.14	680	3817678	680	3817678	38110	7100	2870	0	4053	3348678	826	1.06	64.66	87.72	469000	60.46	12.28	31
MAG889	d__Bacteria;p__Pseudomonadota;c__Alphaproteobacteria;o__Sphingomonadales;f__Sphingomonadaceae;g__Sphingomicrobium;s__Unclassified	65.54	357	2113205	357	2113205	34042	8002	2764	0	2443	1963725	804	1.16	65.79	92.93	149480	62.36	7.07	45
MAG89	d__Bacteria;p__Pseudomonadota;c__Gammaproteobacteria;o__Xanthomonadales;f__Xanthomonadaceae;g__Arenimonas;s__Unclassified	70.43	582	1336974	582	1336974	8631	2276	1596	0	1714	1261611	736	1.28	70.44	94.36	75363	70.2	5.64	7
MAG890	d__Bacteria;p__Bacillota;c__Bacilli;o__Erysipelotrichales;f__Erysipelotrichaceae;g__Erysipelothrix;s__Unclassified	37.21	199	1104159	199	1104159	27589	6614	2955	0	1210	1028730	850	1.1	37.52	93.17	75429	32.93	6.83	28
MAG891	d__Bacteria;p__Myxococcota;c__Myxococcia;o__Myxococcales;f__Anaeromyxobacteraceae;g__Anaeromyxobacter;s__Unclassified	73.23	737	3479700	737	3479700	22678	5788	2357	0	3756	3189249	849	1.08	73.2	91.65	290451	73.48	8.35	28
MAG892	d__Bacteria;p__Bacteroidota;c__Bacteroidia;o__Flavobacteriales;f__Flavobacteriaceae;g__Flavobacterium;s__Unclassified	34.52	946	1549537	946	1549537	6828	1640	1109	0	2158	1387626	643	1.39	35.42	89.55	161911	26.74	10.45	15
MAG893	d__Bacteria;p__Nitrospirota;c__Nitrospiria;o__Nitrospirales;f__Nitrospiraceae;g__Nitrospira_F;s__Unclassified	56.39	830	1879823	830	1879823	9349	2218	1637	0	2440	1683060	690	1.3	56.71	89.53	196763	53.64	10.47	17
MAG894	d__Bacteria;p__Bacteroidota;c__Bacteroidia;o__Chitinophagales;f__Chitinophagaceae;g__Flavisolibacter;s__Unclassified	46.75	1786	2405128	1786	2405128	4077	1294	1047	0	3492	2157021	618	1.45	47.48	89.68	248107	40.41	10.32	17
MAG895	d__Bacteria;p__Pseudomonadota;c__Alphaproteobacteria;o__Rhodobacterales;f__Rhodobacteraceae;g__Paracoccus;s__Unclassified	68.19	723	2020440	723	2020440	17207	3284	1470	0	2501	1852596	741	1.24	68.39	91.69	167844	65.95	8.31	27
MAG896	d__Bacteria;p__Actinomycetota;c__Actinomycetia;o__Propionibacteriales;f__Nocardioidaceae;g__Nocardioides;s__Unclassified	72.61	362	3083433	362	3083433	41424	13779	3969	0	3260	2856921	876	1.06	72.7	92.65	226512	71.46	7.35	37
MAG897	d__Bacteria;p__Actinomycetota;c__Thermoleophilia;o__Gaiellales;f__Gaiellaceae;g__JACCRW01;s__Unclassified	71.94	389	2395681	389	2395681	35355	8250	2989	0	2802	2273718	811	1.17	72.13	94.91	121963	68.27	5.09	40
MAG898	d__Bacteria;p__Pseudomonadota;c__Gammaproteobacteria;o__Burkholderiales;f__Burkholderiaceae_A;g__Unclassified;s__Unclassified	71.81	718	2962262	718	2962262	21914	4715	2293	0	3252	2727909	839	1.1	71.9	92.09	234353	70.75	7.91	39
MAG899	d__Bacteria;p__Bacteroidota;c__Bacteroidia;o__Cytophagales;f__Spirosomaceae;g__Spirosoma;s__Unclassified	55.99	1632	2956183	1632	2956183	7136	1905	1148	0	3885	2612310	672	1.31	57.08	88.37	343873	47.69	11.63	31
MAG9	d__Bacteria;p__Bacteroidota;c__Bacteroidia;o__Chitinophagales;f__Chitinophagaceae;g__Hanamia;s__Unclassified	36.59	583	2821095	583	2821095	29715	5968	2419	0	2965	2546187	859	1.05	37.56	90.26	274908	27.64	9.74	31
MAG90	d__Bacteria;p__Bacteroidota;c__Bacteroidia;o__Flavobacteriales;f__Flavobacteriaceae;g__JAJYTI01;s__Unclassified	37.73	342	1666723	342	1666723	28835	5204	2896	0	1730	1476609	854	1.04	38.6	88.59	190114	30.98	11.41	10
MAG900	d__Bacteria;p__Gemmatimonadota;c__Gemmatimonadetes;o__Longimicrobiales;f__Longimicrobiaceae;g__Longimicrobium;s__Unclassified	70.39	439	7294658	439	7294658	136998	26611	8652	0	6433	6068778	943	0.88	71.3	83.19	1225880	65.9	16.81	68
MAG901	d__Bacteria;p__Pseudomonadota;c__Gammaproteobacteria;o__Burkholderiales;f__Burkholderiaceae_C;g__Paenalcaligenes;s__Unclassified	48.12	257	2251130	257	2251130	51221	16444	3812	0	2311	2072472	897	1.03	48.74	92.06	178658	40.95	7.94	44
MAG902	d__Bacteria;p__Actinomycetota;c__Thermoleophilia;o__Solirubrobacterales;f__Solirubrobacteraceae;g__Palsa-465;s__Unclassified	68.02	801	2135111	801	2135111	9928	2747	1713	0	2713	1958799	722	1.27	68.17	91.74	176312	66.35	8.26	23
MAG903	d__Bacteria;p__Actinomycetota;c__Actinomycetia;o__Actinomycetales;f__Dermatophilaceae;g__Unclassified;s__Unclassified	71.72	252	3824118	252	3824118	66440	20245	7374	0	3630	3433986	946	0.95	71.91	89.8	390132	70	10.2	41
MAG904	d__Bacteria;p__Actinomycetota;c__Actinomycetia;o__Actinomycetales;f__Dermatophilaceae;g__Flexivirga;s__Unclassified	68.98	748	2321707	748	2321707	18192	3421	1835	0	2738	2133711	779	1.18	69.21	91.9	187996	66.4	8.1	29
MAG905	d__Bacteria;p__Gemmatimonadota;c__Gemmatimonadetes;o__Longimicrobiales;f__Longimicrobiaceae;g__Longimicrobium;s__Unclassified	71.12	1654	5062153	1654	5062153	24649	3718	1598	0	5292	4187031	791	1.05	71.59	82.71	875122	68.92	17.29	24
MAG906	d__Bacteria;p__Pseudomonadota;c__Gammaproteobacteria;o__Enterobacterales_A;f__Aeromonadaceae;g__Oceanisphaera;s__Unclassified	47.59	259	1730006	259	1730006	35275	7933	3427	0	1744	1562781	896	1.01	48.24	90.33	167225	41.49	9.67	25
MAG907	d__Bacteria;p__Actinomycetota;c__Actinomycetia;o__Mycobacteriales;f__Mycobacteriaceae;g__Corynebacterium;s__Corynebacterium sp012838985	68.56	175	2368401	175	2368401	73257	26303	5651	0	2447	2190888	895	1.03	69.1	92.5	177513	61.94	7.5	40
MAG908	d__Bacteria;p__Acidobacteriota;c__Blastocatellia;o__Pyrinomonadales;f__Pyrinomonadaceae;g__OLB17;s__Unclassified	54.48	1526	2838280	1526	2838280	11990	1944	1132	0	3569	2597121	728	1.26	55.05	91.5	241159	48.35	8.5	17
MAG909	d__Bacteria;p__Pseudomonadota;c__Gammaproteobacteria;o__Steroidobacterales;f__Steroidobacteraceae;g__ZC4RG30;s__Unclassified	68.04	940	1611673	940	1611673	5362	1741	1145	0	2252	1537011	683	1.4	68.18	95.37	74662	65.28	4.63	12
MAG91	d__Bacteria;p__Pseudomonadota;c__Gammaproteobacteria;o__Steroidobacterales;f__Steroidobacteraceae;g__Povalibacter;s__Unclassified	62.55	1112	3204535	1112	3204535	12211	3205	1690	0	3711	2897544	781	1.16	62.72	90.42	306991	60.95	9.58	24
MAG910	d__Bacteria;p__Myxococcota;c__Myxococcia;o__Myxococcales;f__Myxococcaceae;g__Unclassified;s__Unclassified	63.48	1048	3629662	1048	3629662	16606	3821	1925	0	4104	3329427	811	1.13	63.65	91.73	300235	61.56	8.27	46
MAG911	d__Bacteria;p__Actinomycetota;c__Actinomycetia;o__Actinomycetales;f__Cellulomonadaceae;g__Timonella;s__Unclassified	57.18	662	2220052	662	2220052	27475	4472	1474	0	2519	1988025	789	1.13	57.77	89.55	232027	52.14	10.45	41
MAG912	d__Bacteria;p__Bacillota;c__Bacilli;o__Lactobacillales;f__Aerococcaceae;g__Fundicoccus;s__Unclassified	40.6	332	1703658	332	1703658	24661	6057	2709	0	1784	1496760	839	1.05	41.32	87.86	206898	35.4	12.14	12
MAG913	d__Bacteria;p__Pseudomonadota;c__Alphaproteobacteria;o__Rhodobacterales;f__Rhodobacteraceae;g__Amaricoccus;s__Unclassified	71.97	715	2337755	715	2337755	14137	3634	1893	0	2672	2065722	773	1.14	72.02	88.36	272033	71.56	11.64	25
MAG914	d__Bacteria;p__Pseudomonadota;c__Gammaproteobacteria;o__Pseudomonadales;f__Cellvibrionaceae;g__Cellvibrio;s__Unclassified	51.17	1223	1938306	1223	1938306	6509	1563	1094	0	2618	1715373	655	1.35	51.89	88.5	222933	45.62	11.5	24
MAG915	d__Bacteria;p__Actinomycetota;c__Actinomycetia;o__Mycobacteriales;f__Mycobacteriaceae;g__Gordonia;s__Unclassified	69.83	453	2178098	453	2178098	23994	5644	2612	0	2379	2032131	854	1.09	70.1	93.3	145967	65.97	6.7	27
MAG916	d__Bacteria;p__Bacteroidota;c__Bacteroidia;o__Chitinophagales;f__Chitinophagaceae;g__Niabella;s__Niabella sp023423285	42.04	631	2161203	631	2161203	16557	3806	2008	0	2396	1986654	829	1.11	42.9	91.92	174549	32.25	8.08	20
MAG917	d__Bacteria;p__Bacillota_A;c__Clostridia;o__Tissierellales;f__Gottschalkiaceae;g__Andreesenia;s__Unclassified	43.52	387	1548706	387	1548706	44427	5665	1871	0	1795	1407990	784	1.16	44.36	90.91	140716	35.11	9.09	32
MAG918	d__Bacteria;p__Actinomycetota;c__Actinomycetia;o__Mycobacteriales;f__Mycobacteriaceae;g__Mycobacterium;s__Unclassified	65.4	243	5244034	243	5244034	207271	38847	10032	0	5556	4845903	872	1.06	65.73	92.41	398131	61.31	7.59	52
MAG919	d__Bacteria;p__Actinomycetota;c__Actinomycetia;o__Actinomycetales;f__Microbacteriaceae;g__Leucobacter;s__Unclassified	65.57	609	2527975	609	2527975	27861	5250	2140	0	2688	2306973	858	1.06	65.95	91.26	221002	61.64	8.74	37
MAG92	d__Bacteria;p__Actinomycetota;c__Actinomycetia;o__Actinomycetales;f__Micrococcaceae;g__Glutamicibacter;s__Glutamicibacter protophormiae	65.37	401	2985865	401	2985865	51128	10397	3451	0	3007	2654739	883	1.01	66.24	88.91	331126	58.45	11.09	49
MAG920	d__Bacteria;p__Pseudomonadota;c__Gammaproteobacteria;o__Pseudomonadales;f__Moraxellaceae;g__Acinetobacter;s__Unclassified	42.73	625	2877915	625	2877915	36152	6724	2048	0	2944	2485701	844	1.02	43.89	86.37	392214	35.36	13.63	45
MAG921	d__Bacteria;p__Actinomycetota;c__Thermoleophilia;o__Solirubrobacterales;f__Thermoleophilaceae;g__Unclassified;s__Unclassified	72.87	344	3762413	344	3762413	54688	15066	5332	0	3907	3570108	914	1.04	72.98	94.89	192305	70.83	5.11	45
MAG922	d__Bacteria;p__Patescibacteria;c__Saccharimonadia;o__Saccharimonadales;f__UBA5946;g__Unclassified;s__Unclassified	54.72	325	626575	325	626575	5939	2085	1149	0	890	573123	644	1.42	55.39	91.47	53452	47.55	8.53	21
MAG923	d__Bacteria;p__Pseudomonadota;c__Gammaproteobacteria;o__Burkholderiales;f__Burkholderiaceae_B;g__Ramlibacter;s__Unclassified	70.26	839	3264116	839	3264116	16823	4779	2030	0	3918	3033228	774	1.2	70.42	92.93	230888	68.08	7.07	36
MAG924	d__Bacteria;p__Bacteroidota;c__Bacteroidia;o__Cytophagales;f__Cyclobacteriaceae;g__Algoriphagus;s__Unclassified	47.29	553	3792591	553	3792591	39347	9086	3426	0	3642	3384444	929	0.96	48.14	89.24	408147	40.27	10.76	39
MAG925	d__Bacteria;p__Pseudomonadota;c__Gammaproteobacteria;o__Xanthomonadales;f__Xanthomonadaceae;g__Thermomonas;s__Unclassified	68.58	497	2186688	497	2186688	22828	5247	2224	0	2449	2004432	818	1.12	68.68	91.67	182256	67.5	8.33	29
MAG926	d__Bacteria;p__Actinomycetota;c__Actinomycetia;o__Actinomycetales;f__Microbacteriaceae;g__Unclassified;s__Unclassified	54.17	247	1493072	247	1493072	54562	10278	2353	0	1560	1382172	886	1.04	54.54	92.57	110900	49.53	7.43	35
MAG927	d__Bacteria;p__Actinomycetota;c__Thermoleophilia;o__Gaiellales;f__Gaiellaceae;g__GMQP-bins7;s__Unclassified	70.84	537	2279680	537	2279680	17612	5231	2121	0	2775	2152662	776	1.22	70.89	94.43	127018	69.95	5.57	41
MAG928	d__Bacteria;p__Bacteroidota;c__Bacteroidia;o__Bacteroidales;f__Dysgonomonadaceae;g__UBA2632;s__UBA2632 sp012840785	37.51	275	1915882	275	1915882	49863	9406	3486	0	1830	1673826	915	0.96	38.72	87.37	242056	29.11	12.63	25
MAG929	d__Bacteria;p__Cyanobacteriota;c__Cyanobacteriia;o__Cyanobacteriales;f__Chroococcidiopsidaceae;g__Chroococcidiopsis;s__Chroococcidiopsis thermalis	44.5	174	6570771	174	6570771	258964	64219	17684	0	5992	5539440	924	0.91	45.44	84.3	1031331	39.44	15.7	39
MAG93	d__Bacteria;p__Patescibacteria;c__Saccharimonadia;o__Saccharimonadales;f__UBA1547;g__JAEWBQ01;s__Unclassified	53.84	62	688036	62	688036	55922	14100	5413	0	744	631074	848	1.08	54.6	91.72	56962	45.41	8.28	25
MAG930	d__Bacteria;p__Acidobacteriota;c__Blastocatellia;o__Pyrinomonadales;f__Pyrinomonadaceae;g__UBA11740;s__Unclassified	56.37	450	4157516	450	4157516	59090	14960	4324	0	3839	3720990	969	0.92	56.78	89.5	436526	52.83	10.5	43
MAG931	d__Bacteria;p__Chloroflexota;c__Limnocylindria;o__Limnocylindrales;f__CSP1-4;g__SPCO01;s__Unclassified	70.14	733	2465920	733	2465920	16937	3523	2190	0	2981	2290962	769	1.21	70.11	92.9	174958	70.54	7.1	31
MAG932	d__Bacteria;p__Bacteroidota;c__Bacteroidia;o__Sphingobacteriales;f__Sphingobacteriaceae;g__Mucilaginibacter;s__Unclassified	42.93	2080	4401421	2080	4401421	12718	2304	1176	0	5256	4002033	761	1.19	43.7	90.93	399388	35.26	9.07	39
MAG933	d__Bacteria;p__Acidobacteriota;c__Thermoanaerobaculia;o__UBA5704;f__UBA5704;g__UBA5704;s__Unclassified	67.25	1922	5913284	1922	5913284	11034	3388	1834	0	6670	5260338	789	1.13	67.85	88.96	652946	62.4	11.04	39
MAG934	d__Bacteria;p__Pseudomonadota;c__Alphaproteobacteria;o__Rhizobiales;f__Xanthobacteraceae;g__PALSA-894;s__Unclassified	66.9	1245	3596567	1245	3596567	18378	3579	1420	0	4370	3275133	749	1.22	67.3	91.06	321434	62.84	8.94	15
MAG935	d__Bacteria;p__Gemmatimonadota;c__Gemmatimonadetes;o__Gemmatimonadales;f__GWC2-71-9;g__Palsa-1233;s__Unclassified	66.63	1442	2310022	1442	2310022	5904	1591	1108	0	3321	2160294	651	1.44	66.81	93.52	149728	63.97	6.48	17
MAG936	d__Bacteria;p__Acidobacteriota;c__Blastocatellia;o__Pyrinomonadales;f__Pyrinomonadaceae;g__PSRF01;s__Unclassified	50.73	2304	6141806	2304	6141806	17584	3147	1375	0	6656	5388024	810	1.08	51.09	87.73	753782	48.16	12.27	53
MAG937	d__Bacteria;p__Actinomycetota;c__Thermoleophilia;o__Solirubrobacterales;f__Solirubrobacteraceae;g__Unclassified;s__Unclassified	71.45	277	3079457	277	3079457	64066	16837	5056	0	3249	2919456	899	1.06	71.54	94.8	160001	69.79	5.2	49
MAG938	d__Bacteria;p__Chloroflexota;c__Chloroflexia;o__Thermomicrobiales;f__UBA6265;g__UBA6265;s__Unclassified	58.65	292	2740946	292	2740946	69229	12647	4522	0	2749	2500527	910	1	59.11	91.23	240419	53.79	8.77	36
MAG939	d__Bacteria;p__Patescibacteria;c__Saccharimonadia;o__Saccharimonadales;f__UBA4665;g__UBA4665;s__Unclassified	53.65	80	977233	80	977233	42158	16915	6186	0	1055	876825	831	1.08	54.74	89.73	100408	44.08	10.27	38
MAG94	d__Bacteria;p__Bacteroidota;c__UBA10030;o__UBA10030;f__UBA8401;g__SpSt-333;s__Unclassified	51.43	267	3107034	267	3107034	72681	20279	5650	0	2828	2872341	1016	0.91	52.14	92.45	234693	42.79	7.55	34
MAG940	d__Bacteria;p__Actinomycetota;c__Actinomycetia;o__Unclassified;f__Unclassified;g__Unclassified;s__Unclassified	69.78	1743	2214531	1743	2214531	3755	1221	1031	0	3269	2121855	649	1.48	69.72	95.82	92676	71.2	4.18	2
MAG941	d__Bacteria;p__Actinomycetota;c__Actinomycetia;o__Actinomycetales;f__Actinomycetaceae;g__Unclassified;s__Unclassified	71.76	696	2002222	696	2002222	12284	3098	1710	0	2345	1853235	790	1.17	71.9	92.56	148987	70.07	7.44	31
MAG942	d__Bacteria;p__Actinomycetota;c__Actinomycetia;o__Actinomycetales;f__Micrococcaceae;g__Kocuria;s__Unclassified	63.88	376	1957811	376	1957811	25664	6318	2698	0	1984	1782921	899	1.01	64.26	91.07	174890	59.97	8.93	23
MAG943	d__Bacteria;p__Actinomycetota;c__Actinomycetia;o__Propionibacteriales;f__Propionibacteriaceae;g__Microlunatus;s__Unclassified	71.68	626	3555013	626	3555013	45399	7880	2572	0	3691	3227100	874	1.04	71.84	90.78	327913	70.11	9.22	36
MAG944	d__Bacteria;p__Bacillota;c__Bacilli;o__Staphylococcales;f__Salinicoccaceae;g__Salinicoccus;s__Unclassified	43.17	273	2175358	273	2175358	63896	14147	3629	0	2350	1973160	840	1.08	44.13	90.71	202198	33.8	9.29	17
MAG945	d__Bacteria;p__Actinomycetota;c__Actinomycetia;o__JAHEKZ01;f__JAHEKZ01;g__Unclassified;s__Unclassified	67.27	536	1297654	536	1297654	7792	2445	1637	0	1673	1207422	722	1.29	67.35	93.05	90232	66.24	6.95	15
MAG946	d__Bacteria;p__Actinomycetota;c__Actinomycetia;o__Propionibacteriales;f__Propionibacteriaceae;g__Raineyella;s__Unclassified	69.8	233	2733086	233	2733086	109703	20294	4734	0	2679	2518101	940	0.98	69.89	92.13	214985	68.66	7.87	43
MAG947	d__Bacteria;p__Bacillota;c__Bacilli;o__Bacillales;f__Planococcaceae;g__Sporosarcina;s__Unclassified	47.34	653	1959033	653	1959033	25618	4018	1446	0	2416	1772541	734	1.23	48.09	90.48	186492	40.25	9.52	13
MAG948	d__Bacteria;p__Pseudomonadota;c__Gammaproteobacteria;o__Burkholderiales;f__Nitrosomonadaceae;g__Nitrosospira;s__Unclassified	53.7	408	1145564	408	1145564	10466	2824	1812	0	1353	1001640	740	1.18	54.55	87.44	143924	47.83	12.56	12
MAG949	d__Bacteria;p__Bacillota_A;c__Clostridia;o__Lachnospirales;f__Lachnospiraceae;g__Blautia_A;s__Blautia_A sp000285855	41.99	586	2479257	586	2479257	32070	4784	2134	0	2675	2177655	814	1.08	42.94	87.83	301602	35.2	12.17	31
MAG95	d__Bacteria;p__Pseudomonadota;c__Gammaproteobacteria;o__Steroidobacterales;f__Steroidobacteraceae;g__13-2-20CM-66-19;s__Unclassified	60.79	2571	7545921	2571	7545921	25670	3180	1828	0	9031	6758238	748	1.2	61	89.56	787683	58.96	10.44	62
MAG950	d__Bacteria;p__Actinomycetota;c__Actinomycetia;o__Actinomycetales;f__Dermatophilaceae;g__Marihabitans;s__Marihabitans endophyticus	72.23	388	2391987	388	2391987	59841	10709	2468	0	2508	2251515	898	1.05	72.3	94.13	140472	71.06	5.87	34
MAG951	d__Bacteria;p__Actinomycetota;c__Actinomycetia;o__Mycobacteriales;f__Jatrophihabitantaceae;g__Jatrophihabitans_A;s__Unclassified	70.4	159	4174734	159	4174734	163191	44823	13417	0	3849	3777258	981	0.92	70.85	90.48	397476	66.1	9.52	46
MAG952	d__Bacteria;p__Pseudomonadota;c__Alphaproteobacteria;o__Rhodobacterales;f__Rhodobacteraceae;g__Paracoccus;s__Paracoccus sp021491915	65.44	1132	1944805	1132	1944805	5399	1784	1132	0	2791	1803447	646	1.44	65.76	92.73	141358	61.38	7.27	19
MAG953	d__Bacteria;p__Deinococcota;c__Deinococci;o__Deinococcales;f__Deinococcaceae;g__Deinococcus;s__Unclassified	66.7	1485	2595663	1485	2595663	8824	1779	1123	0	3608	2252535	624	1.39	67.45	86.78	343128	61.81	13.22	30
MAG954	d__Bacteria;p__Nitrospirota;c__Nitrospiria;o__Nitrospirales;f__Nitrospiraceae;g__Nitrospira_F;s__Unclassified	56.65	1594	2505763	1594	2505763	6906	1563	1087	0	3677	2181759	593	1.47	57.05	87.07	324004	53.98	12.93	34
MAG955	d__Bacteria;p__Actinomycetota;c__Actinomycetia;o__Actinomycetales;f__Micrococcaceae;g__Glutamicibacter;s__Glutamicibacter mishrai	60.79	522	2202928	522	2202928	30246	6720	1704	0	2335	1987200	851	1.06	61.6	90.21	215728	53.33	9.79	22
MAG956	d__Bacteria;p__Bacteroidota;c__Bacteroidia;o__Chitinophagales;f__Chitinophagaceae;g__Flavisolibacter;s__Unclassified	48.68	1791	3493413	1791	3493413	9843	2055	1191	0	4409	3105699	704	1.26	49.61	88.9	387714	41.24	11.1	20
MAG957	d__Bacteria;p__Acidobacteriota;c__Blastocatellia;o__Pyrinomonadales;f__Pyrinomonadaceae;g__PSRF01;s__Unclassified	54.3	1597	6354624	1597	6354624	28957	4734	2062	0	6456	5855865	907	1.02	54.8	92.15	498759	48.38	7.85	48
MAG958	d__Bacteria;p__Pseudomonadota;c__Alphaproteobacteria;o__Rhodobacterales;f__Rhodobacteraceae;g__Rubellimicrobium;s__Unclassified	69.93	979	2851326	979	2851326	18257	3078	1754	0	3516	2518380	716	1.23	70.19	88.32	332946	67.94	11.68	30
MAG959	d__Bacteria;p__Pseudomonadota;c__Gammaproteobacteria;o__Burkholderiales;f__Usitatibacteraceae;g__Usitatibacter;s__Unclassified	69.88	642	3200964	642	3200964	33976	8282	2022	0	3612	3064989	849	1.13	70.05	95.75	135975	65.86	4.25	29
MAG96	d__Bacteria;p__Bacteroidota;c__Bacteroidia;o__Chitinophagales;f__Chitinophagaceae;g__Arachidicoccus;s__Arachidicoccus soli	36.15	351	3867114	351	3867114	116724	18513	4886	0	3476	3429186	987	0.9	37	88.68	437928	29.46	11.32	38
MAG960	d__Bacteria;p__Chloroflexota;c__Limnocylindria;o__Limnocylindrales;f__CSP1-4;g__CAIXZV01;s__Unclassified	72.18	499	3349381	499	3349381	38071	9569	3070	0	3503	3052860	872	1.05	72.11	91.15	296521	72.93	8.85	44
MAG961	d__Bacteria;p__Pseudomonadota;c__Gammaproteobacteria;o__Burkholderiales;f__SG8-39;g__SCGC-AG-212-J23;s__Unclassified	66.18	627	3246583	627	3246583	32079	6203	2711	0	3941	3129618	794	1.21	66.33	96.4	116965	62.18	3.6	28
MAG962	d__Bacteria;p__Pseudomonadota;c__Alphaproteobacteria;o__Rhizobiales;f__Xanthobacteraceae;g__VAZQ01;s__Unclassified	64.12	1540	5834764	1540	5834764	22234	4316	2031	0	6555	5057040	771	1.12	64.38	86.67	777724	62.43	13.33	33
MAG963	d__Bacteria;p__Actinomycetota;c__Actinomycetia;o__Actinomycetales;f__Dermatophilaceae;g__Janibacter;s__Unclassified	71.26	723	1916363	723	1916363	8986	2692	1697	0	2375	1787964	753	1.24	71.42	93.3	128399	69.13	6.7	20
MAG964	d__Bacteria;p__Pseudomonadota;c__Gammaproteobacteria;o__Pseudomonadales;f__Pseudomonadaceae;g__Thiopseudomonas;s__Unclassified	48.24	188	2881672	188	2881672	137019	35991	8131	0	2694	2518254	935	0.93	48.9	87.39	363418	43.64	12.61	45
MAG965	d__Bacteria;p__Actinomycetota;c__Actinomycetia;o__Mycobacteriales;f__CADCTP01;g__CADCTP01;s__Unclassified	72.65	1373	4207537	1373	4207537	13489	3311	1818	0	5033	3805746	756	1.2	72.8	90.45	401791	71.25	9.55	35
MAG966	d__Bacteria;p__Pseudomonadota;c__Gammaproteobacteria;o__Pseudomonadales;f__Cellvibrionaceae;g__Cellvibrio;s__Unclassified	45.88	582	2432168	582	2432168	25881	5197	2176	0	2637	2193090	832	1.08	46.56	90.17	239078	39.68	9.83	33
MAG967	d__Bacteria;p__Actinomycetota;c__Actinomycetia;o__Streptomycetales;f__Streptomycetaceae;g__Streptomyces;s__Unclassified	72.55	1255	3955310	1255	3955310	16999	3438	1835	0	4776	3591186	752	1.21	72.8	90.79	364124	70.13	9.21	39
MAG968	d__Bacteria;p__Armatimonadota;c__Fimbriimonadia;o__Fimbriimonadales;f__ATM1;g__Unclassified;s__Unclassified	57.43	2260	3093906	2260	3093906	4244	1313	1050	0	4973	2688828	541	1.61	57.73	86.91	405078	55.46	13.09	99
MAG969	d__Bacteria;p__Bacteroidota;c__Bacteroidia;o__Chitinophagales;f__Chitinophagaceae;g__Flaviaesturariibacter;s__Unclassified	44.8	1692	2527852	1692	2527852	6623	1469	1065	0	3364	2317530	689	1.33	45.39	91.68	210322	38.36	8.32	19
MAG97	d__Bacteria;p__Pseudomonadota;c__Alphaproteobacteria;o__Rhizobiales;f__Devosiaceae;g__Devosia;s__Devosia sp015234425	62.42	376	3542235	376	3542235	65071	16998	3833	0	3691	3192732	865	1.04	62.85	90.13	349503	58.47	9.87	42
MAG970	d__Bacteria;p__Actinomycetota;c__Thermoleophilia;o__Solirubrobacterales;f__Solirubrobacteraceae;g__Unclassified;s__Unclassified	69.81	183	2328486	183	2328486	74245	18506	6297	0	2510	2195439	875	1.08	69.84	94.29	133047	69.26	5.71	39
MAG971	d__Bacteria;p__Pseudomonadota;c__Alphaproteobacteria;o__Rhodobacterales;f__Rhodobacteraceae;g__Paracoccus;s__Paracoccus sp021491915	65.7	753	2115700	753	2115700	11500	2934	1743	0	2717	1957563	720	1.28	66	92.53	158137	61.97	7.47	24
MAG972	d__Bacteria;p__Actinomycetota;c__Actinomycetia;o__Mycobacteriales;f__Micromonosporaceae;g__Unclassified;s__Unclassified	67.71	2504	4557302	2504	4557302	9853	1908	1186	0	6184	4042623	654	1.36	68.08	88.71	514679	64.8	11.29	37
MAG973	d__Bacteria;p__Gemmatimonadota;c__Gemmatimonadetes;o__Gemmatimonadales;f__Gemmatimonadaceae;g__Fen-1247;s__Unclassified	67.89	853	3038762	853	3038762	16891	4074	1955	0	3358	2857290	851	1.11	68.05	94.03	181472	65.32	5.97	25
MAG974	d__Bacteria;p__Pseudomonadota;c__Gammaproteobacteria;o__Steroidobacterales;f__Steroidobacteraceae;g__CADEED01;s__Unclassified	65.92	1262	2690073	1262	2690073	8423	2276	1331	0	3424	2517453	735	1.27	66.16	93.58	172620	62.43	6.42	17
MAG975	d__Bacteria;p__Actinomycetota;c__Actinomycetia;o__Mycobacteriales;f__Pseudonocardiaceae;g__Actinocrispum;s__Unclassified	67.21	2357	8309608	2357	8309608	17689	4062	1956	0	9291	7574793	815	1.12	67.64	91.16	734815	62.79	8.84	42
MAG976	d__Bacteria;p__Actinomycetota;c__Actinomycetia;o__Actinomycetales;f__Microbacteriaceae;g__Microbacterium;s__Microbacterium commune	70.29	342	1770074	342	1770074	33913	6388	2488	0	1940	1663659	858	1.1	70.43	93.99	106415	68.07	6.01	32
MAG977	d__Bacteria;p__Actinomycetota;c__Thermoleophilia;o__Solirubrobacterales;f__70-9;g__VAYN01;s__Unclassified	67.91	638	1889021	638	1889021	11920	3179	1796	0	2410	1744047	724	1.28	68.33	92.33	144974	62.85	7.67	38
MAG978	d__Archaea;p__Thermoproteota;c__Nitrososphaeria;o__Nitrososphaerales;f__Nitrososphaeraceae;g__TA-21;s__Unclassified	35.68	192	1482252	192	1482252	38089	10130	3804	0	1840	1225896	666	1.24	36.68	82.7	256356	30.89	17.3	20
MAG979	d__Bacteria;p__Pseudomonadota;c__Gammaproteobacteria;o__Diplorickettsiales;f__Diplorickettsiaceae;g__Aquirickettsiella;s__Unclassified	39.02	491	1262682	491	1262682	23849	3024	1338	0	1538	1139214	741	1.22	39.53	90.22	123468	34.28	9.78	25
MAG98	d__Bacteria;p__Pseudomonadota;c__Gammaproteobacteria;o__Burkholderiales;f__Burkholderiaceae;g__Telluria;s__Unclassified	65.52	1306	2467972	1306	2467972	8824	2008	1124	0	3303	2269323	687	1.34	66.25	91.95	198649	57.16	8.05	14
MAG980	d__Bacteria;p__Gemmatimonadota;c__Gemmatimonadetes;o__Gemmatimonadales;f__Gemmatimonadaceae;g__JABFXC01;s__Unclassified	69.24	469	3088137	469	3088137	35464	7828	3547	0	3080	2835039	920	1	69.5	91.8	253098	66.28	8.2	27
MAG981	d__Bacteria;p__Bacteroidota;c__Bacteroidia;o__Chitinophagales;f__Chitinophagaceae;g__Hanamia;s__Unclassified	38.21	1088	3433412	1088	3433412	13502	3442	1826	0	3776	3006147	796	1.1	39.19	87.56	427265	31.27	12.44	27
MAG982	d__Bacteria;p__Actinomycetota;c__Actinomycetia;o__Actinomycetales;f__Microbacteriaceae;g__Microbacterium;s__Microbacterium sp003293595	69.92	590	2623436	590	2623436	21492	5552	2175	0	2876	2460837	856	1.1	70.01	93.8	162599	68.47	6.2	28
MAG983	d__Bacteria;p__Bacteroidota;c__Bacteroidia;o__Chitinophagales;f__Chitinophagaceae;g__Ferruginibacter;s__Unclassified	44.14	1181	2622501	1181	2622501	7115	2189	1611	0	3161	2315163	732	1.21	44.91	88.28	307338	38.35	11.72	17
MAG984	d__Bacteria;p__Pseudomonadota;c__Alphaproteobacteria;o__Rhodobacterales;f__Rhodobacteraceae;g__Amaricoccus;s__Unclassified	70.89	1086	3524706	1086	3524706	21625	3590	1813	0	4281	3132987	732	1.21	71.34	88.89	391719	67.23	11.11	36
MAG985	d__Bacteria;p__Actinomycetota;c__Actinomycetia;o__Actinomycetales;f__Dermabacteraceae;g__Brachybacterium;s__Brachybacterium massiliense	71.48	293	1699452	293	1699452	30132	6817	3097	0	1730	1556403	900	1.02	71.54	91.58	143049	70.8	8.42	26
MAG986	d__Bacteria;p__Gemmatimonadota;c__Gemmatimonadetes;o__Gemmatimonadales;f__Gemmatimonadaceae;g__JABFXC01;s__Unclassified	66.71	627	2748413	627	2748413	18046	4878	2486	0	2918	2544213	872	1.06	66.88	92.57	204200	64.57	7.43	32
MAG987	d__Archaea;p__Thermoproteota;c__Nitrososphaeria;o__Nitrososphaerales;f__Nitrososphaeraceae;g__TH1177;s__Unclassified	29.78	961	1604720	961	1604720	5932	1688	1106	0	2232	1237197	554	1.39	31.31	77.1	367523	24.63	22.9	7
MAG988	d__Bacteria;p__Actinomycetota;c__Acidimicrobiia;o__Acidimicrobiales;f__Ilumatobacteraceae;g__Ilumatobacter;s__Unclassified	70.12	931	2876112	931	2876112	10239	3493	1777	0	3525	2713716	770	1.23	70.23	94.35	162396	68.29	5.65	46
MAG989	d__Bacteria;p__Pseudomonadota;c__Gammaproteobacteria;o__Burkholderiales;f__Burkholderiaceae;g__Pseudoduganella;s__Unclassified	66.37	458	5210017	458	5210017	69512	14673	6128	0	5010	4775310	953	0.96	67.27	91.66	434707	56.42	8.34	56
MAG99	d__Bacteria;p__Pseudomonadota;c__Gammaproteobacteria;o__Burkholderiales;f__Burkholderiaceae_B;g__Giesbergeria;s__Unclassified	65.8	309	1922312	309	1922312	46831	7294	3420	0	1890	1704717	902	0.98	66.25	88.68	217595	62.31	11.32	34
MAG990	d__Bacteria;p__Nitrospirota;c__Nitrospiria;o__Nitrospirales;f__Nitrospiraceae;g__Nitrospira_F;s__Unclassified	55.14	1505	3310983	1505	3310983	10529	2342	1304	0	4509	2815269	624	1.36	55.75	85.03	495714	51.67	14.97	30
MAG991	d__Bacteria;p__Bacteroidota;c__Bacteroidia;o__Chitinophagales;f__Chitinophagaceae;g__Hanamia;s__Unclassified	37.89	598	3421948	598	3421948	35579	6648	3043	0	3318	3033339	914	0.97	38.86	88.64	388609	30.26	11.36	33
MAG992	d__Bacteria;p__Patescibacteria;c__Saccharimonadia;o__Saccharimonadales;f__UBA4665;g__Unclassified;s__Unclassified	50.59	77	564893	77	564893	20954	7953	4736	0	669	512916	767	1.18	51.22	90.8	51977	44.43	9.2	24
MAG993	d__Archaea;p__Thermoproteota;c__Nitrososphaeria;o__Nitrososphaerales;f__Nitrososphaeraceae;g__TH5893;s__Unclassified	40.06	824	1606320	824	1606320	14563	2034	1134	0	2271	1276281	562	1.41	40.95	79.45	330039	36.58	20.55	20
MAG994	d__Bacteria;p__Pseudomonadota;c__Gammaproteobacteria;o__Xanthomonadales;f__Rhodanobacteraceae;g__Rhodanobacter;s__Unclassified	69.19	566	2223450	566	2223450	26214	4448	2089	0	2499	2023854	810	1.12	69.53	91.02	199596	65.73	8.98	28
MAG995	d__Bacteria;p__Chloroflexota;c__UBA6077;o__UBA6077;f__JADZDV01;g__Unclassified;s__Unclassified	68.79	2224	3983751	2224	3983751	5885	1869	1152	0	5230	3525753	674	1.31	68.8	88.5	457998	68.78	11.5	25
MAG996	d__Bacteria;p__Acidobacteriota;c__Vicinamibacteria;o__Vicinamibacterales;f__2-12-FULL-66-21;g__JACCXG01;s__Unclassified	66.17	624	5385842	624	5385842	45860	12253	4097	0	4853	4843794	998	0.9	66.5	89.94	542048	63.3	10.06	30
MAG997	d__Bacteria;p__Dormibacterota;c__Dormibacteria;o__Dormibacterales;f__Dormibacteraceae;g__Unclassified;s__Unclassified	71.73	423	1992327	423	1992327	20311	5712	2437	0	2341	1877811	802	1.18	71.94	94.25	114516	68.19	5.75	19
MAG998	d__Bacteria;p__Actinomycetota;c__Actinomycetia;o__Propionibacteriales;f__Propionibacteriaceae;g__Arachnia;s__Unclassified	69.05	226	2817263	226	2817263	71881	18586	5382	0	2707	2630751	972	0.96	69.3	93.38	186512	65.56	6.62	35
MAG999	d__Bacteria;p__Pseudomonadota;c__Gammaproteobacteria;o__Xanthomonadales;f__Rhodanobacteraceae;g__Rudaea;s__Unclassified	64.85	645	4365164	645	4365164	45261	9610	3034	0	4089	3848523	941	0.94	65.29	88.16	516641	61.52	11.84	30
