# Supplementary material for: Insights into antibiotic resistomes from metagenome-assembled genomes and gene catalogs of soil microbiota across environments
Source: PeerJ. 2025 Nov 19;13:e20348. doi: 10.7717/peerj.20348 (PMC12640132; doi:10.7717/peerj.20348)
Supplement: Supplemental Information 11 [file peerj-13-20348-s011.xlsx]

## Sheet: MAGs relative abundance
Table S6: MAGs relative abundance.
MAG	Taxonomy	Province	SCE5	SCE23	SCE9	SCE10	SCE14	SCE16	SCE20	SCE1	SCE13	SCE29	SCE28	SCE24	SCE22	SCE2	SCE25	SCE26	SCE11	SCE21	SCE12	SCE8	SCE19	SCE18	SCE15	SCE4	SCE27	GZE16	GZE19	GZE2	GZE3	GZE6	GZE25	GZE7	GZE10	GZE27	GZE17	GZE15	GZE12	GZE18	GZE26	GZE13	GZE24	GZE20	GZE11	GZE4	GZE8	GZE28	GZE21
MAG1	d__Bacteria;p__Acidobacteriota;c__Thermoanaerobaculia;o__Gp7-AA8;f__Gp7-AA8;g__QHVT01;s__Unclassified	Guizhou	0	0	0	0	0	0	0	0	0	0	0	0	0	0	0	0	0	0	0	0	0	0	0	0	0	0	0	0	0	0	0	0	0	0	0	0	0	0	0	10.6022	0	0	0	0	0	0	0
MAG10	d__Bacteria;p__Actinomycetota;c__Actinomycetia;o__Actinomycetales;f__Actinomycetaceae;g__Flaviflexus;s__Unclassified	Sichuan	0	0	0.0299847	0	0	0	0	0	0	0	0	0	0.0392202	0.984783	0.194024	0	0	0.0175161	0	0	0.101162	0	0.0341766	0.0281399	0	0	0	0	0	0	0	0	0	0	0	0	0	0	0	0	0	0	0	0	0	0	0
MAG100	d__Bacteria;p__Bacteroidota;c__Bacteroidia;o__AKYH767;f__2-12-FULL-35-15;g__2-12-FULL-35-15;s__Unclassified	Sichuan、Guizhou、Yunnan	0	0.0667956	0	2.07749	0.0799304	0.537461	0.639986	0	1.87993	0.190375	0	0	0	0	0.0457052	0.151798	0	0	0.0489635	0.27574	0	5.86901	0	0	0.395109	0	0	0	0	0	0	0	0	0	0	0	0	0	0	0	0	0.223736	0	0	0	0	0
MAG1000	d__Bacteria;p__Actinomycetota;c__Thermoleophilia;o__Gaiellales;f__Gaiellaceae;g__Palsa-739;s__Unclassified	Jiangsu	0	0	0	0	0	0	0	0	0	0	0	0	0	0	0	0	0	0	0	0	0	0	0	0	0	0	0	0	0	0	0	0	0	0	0	0	0	0	0	0	0	0	0	0	0	0	0
MAG1001	d__Bacteria;p__Actinomycetota;c__Actinomycetia;o__Propionibacteriales;f__Nocardioidaceae;g__Nocardioides;s__Unclassified	Yunnan、Jiangsu	0	0	0	0	0	0	0	0	0	0	0	0	0	0	0	0	0	0	0	0	0	0	0	0	0	0	0	0	0	0	0	0	0	0	0	0	0	0	0	0	0	0	0	0	0	0	0
MAG1002	d__Bacteria;p__Bacillota;c__Bacilli;o__Staphylococcales;f__Staphylococcaceae;g__Mammaliicoccus;s__Mammaliicoccus sciuri	Sichuan、Jiangsu	0.059777	0	0.101061	0	0	0	0	0	0	0	0	0	0	0	0	0	0	0	0	0	0.0695983	0	0.0322848	0	0	0	0	0	0	0	0	0	0	0	0	0	0	0	0	0	0	0	0	0	0	0	0
MAG1003	d__Bacteria;p__Bacteroidota;c__Bacteroidia;o__Flavobacteriales;f__Weeksellaceae;g__Kaistella;s__Unclassified	Sichuan、Yunnan	0.378771	0	0	0	0.0713634	0	0	0.119141	0	0	0	0	0	0	0.062007	0	0	0	0.577958	0	0	0.0969896	6.72052	0	0	0	0	0	0	0	0	0	0	0	0	0	0	0	0	0	0	0	0	0	0	0	0
MAG1004	d__Bacteria;p__Bacillota;c__Bacilli;o__Lactobacillales;f__Enterococcaceae;g__Enterococcus_F;s__Unclassified	Sichuan	0	0	0.866959	0	0	0	0	0	0	0	0	0	0	0.118375	0	0	0	0	0	0	0.126052	0	0.0587363	0	0	0	0	0	0	0	0	0	0	0	0	0	0	0	0	0	0	0	0	0	0	0	0
MAG1005	d__Bacteria;p__Actinomycetota;c__Thermoleophilia;o__Gaiellales;f__Gaiellaceae;g__JACCRW01;s__Unclassified	Guizhou、Yunnan	0	0	0	0	0	0	0	0	0	0	0	0	0	0	0	0	0	0	0	0	0	0	0	0	0	0	0	0	0	0	0	0	0	0.25272	0	0	0	0	0	0	0	0	0	0	0	0	0
MAG1006	d__Bacteria;p__Pseudomonadota;c__Alphaproteobacteria;o__Sphingomonadales;f__Sphingomonadaceae;g__Sphingomicrobium;s__Unclassified	Yunnan	0	0	0	0	0	0	0	0	0	0	0	0	0	0	0	0	0	0	0	0	0	0	0	0	0	0	0	0	0	0	0	0	0	0	0	0	0	0	0	0	0	0	0	0	0	0	0
MAG1007	d__Bacteria;p__Pseudomonadota;c__Gammaproteobacteria;o__Pseudomonadales;f__Pseudomonadaceae;g__Stutzerimonas;s__Stutzerimonas stutzeri_AK	Sichuan	0	0	0.064559	0	0	0	0	0	0	0	0	0	0	1.67766	0	0	0	0	0	0	0	0	0.525513	0	0	0	0	0	0	0	0	0	0	0	0	0	0	0	0	0	0	0	0	0	0	0	0
MAG1008	d__Bacteria;p__Pseudomonadota;c__Alphaproteobacteria;o__Rhodobacterales;f__Rhodobacteraceae;g__Paracoccus;s__Paracoccus alcaliphilus	Sichuan	0	0	0.345908	0	0	0	0	0	0	0	0	0	0.0190866	0.0964745	0.0449676	0	0	0.00854597	0	0	0.06787	0	0.0208668	0.00734838	0.63278	0	0	0	0	0	0	0	0	0	0	0	0	0	0	0	0	0	0	0	0	0	0
MAG1009	d__Archaea;p__Thermoproteota;c__Nitrososphaeria;o__Nitrososphaerales;f__Nitrososphaeraceae;g__TH1177;s__Unclassified	Sichuan、Guizhou、Yunnan、Jiangsu	0	0	0	0	0.479817	0	0	0	0	0	0	1.01452	0	0	0	0.708301	0	0	0	0.162822	0	0	0	0	0	0.878584	0.455743	4.52819	0	4.17343	2.17073	0.258932	2.50333	0	1.37432	0.39945	2.15086	2.26571	0.410829	1.58276	1.00185	0.251777	0.29949	1.61975	3.34308	0.191641	4.18972
MAG101	d__Bacteria;p__Pseudomonadota;c__Gammaproteobacteria;o__Burkholderiales;f__Burkholderiaceae_B;g__Ramlibacter;s__Unclassified	Yunnan	0	0	0	0	0	0	0	0	0	0	0	0	0	0	0	0	0	0	0	0	0	0	0	0	0	0	0	0	0	0	0	0	0	0	0	0	0	0	0	0	0	0	0	0	0	0	0
MAG1010	d__Bacteria;p__Bacillota_A;c__Clostridia;o__Lachnospirales;f__Lachnospiraceae;g__UBA2868;s__UBA2868 sp004552595	Yunnan	0	0	0	0	0	0	0	0	0	0	0	0	0	0	0	0	0	0	0	0	0	0	0	0	0	0	0	0	0	0	0	0	0	0	0	0	0	0	0	0	0	0	0	0	0	0	0
MAG1011	d__Bacteria;p__Pseudomonadota;c__Alphaproteobacteria;o__Sphingomonadales;f__Sphingomonadaceae;g__Allosphingosinicella;s__Unclassified	Jiangsu	0	0	0	0	0	0	0	0	0	0	0	0	0	0	0	0	0	0	0	0	0	0	0	0	0	0	0	0	0	0	0	0	0	0	0	0	0	0	0	0	0	0	0	0	0	0	0
MAG1012	d__Bacteria;p__Actinomycetota;c__Actinomycetia;o__Actinomycetales;f__Microbacteriaceae;g__Microbacterium;s__Microbacterium sp019061125	Sichuan	0.573257	0	0.0244939	0.323784	0	0.0881645	0	0	0	0	0	0	0	0	0	0	0	0	0.402229	0	0	0	0.065352	0	0	0	0	0	0	0	0	0	0	0	0	0	0	0	0	0	0	0	0	0	0	0	0
MAG1013	d__Bacteria;p__Patescibacteria;c__Saccharimonadia;o__Saccharimonadales;f__Saccharimonadaceae;g__Saccharimonas;s__Unclassified	Yunnan	0	0	0	0	0	0	0	0	0	0	0	0	0	0	0	0	0	0	0	0	0	0	0	0	0	0	0	0	0	0	0	0	0	0	0	0	0	0	0	0	0	0	0	0	0	0	0
MAG1014	d__Bacteria;p__Pseudomonadota;c__Gammaproteobacteria;o__Xanthomonadales;f__Xanthomonadaceae;g__Lysobacter;s__Unclassified	Sichuan、Guizhou	0	0.110231	0	0	0.109392	0	0.289874	11.0447	0	0	0.409974	0.0956756	0	0	0	0.090331	0	0	0	0.0883148	0	0	0	0	0	0.34723	0.1983	0.258117	0	0.0829488	0	0	0	0	0.36615	0	0	0	0	0	0	1.10419	0	0	0	0.142993	0
MAG1015	d__Bacteria;p__Bacillota;c__Bacilli;o__Lactobacillales;f__Lactobacillaceae;g__Limosilactobacillus;s__Limosilactobacillus gallistercoris	Sichuan、Yunnan、Jiangsu	0.234619	0.0593981	0.0933329	0.0910921	0.0572235	0	0	0	0	0	0	0	0.0823598	0.0412965	0.413002	0	0	0.0314821	0.113935	0	1.07082	0	0.0515439	1.53251	0.145767	0	0	0	0	0	0	0	0	0	0	0	0	0	0	0	0	0	0	0	0	0	0
MAG1016	d__Bacteria;p__Chloroflexota;c__Limnocylindria;o__QHBO01;f__QHBO01;g__JACDBZ01;s__Unclassified	Jiangsu	0	0	0	0	0	0	0	0	0	0	0	0	0	0	0	0	0	0	0	0	0	0	0	0	0	0	0	0	0	0	0	0	0	0	0	0	0	0	0	0	0	0	0	0	0	0	0
MAG1017	d__Bacteria;p__Pseudomonadota;c__Gammaproteobacteria;o__Pseudomonadales;f__Moraxellaceae;g__Acinetobacter;s__Acinetobacter pseudolwoffii	Sichuan、Guizhou、Yunnan	0.980699	0	0.134829	0	0	0	0	0	0	0	0	0	0.00990573	1.2952	0.448922	0	0	1.51906	0.0309229	0	0.0190099	0.0581141	0.563562	0.130382	0.121943	0	0	0	0	0	0	0	0	0	0	0	0	0	0	0	0	0	0.0932809	0	0	0	0
MAG1018	d__Bacteria;p__Pseudomonadota;c__Gammaproteobacteria;o__Pseudomonadales;f__Moraxellaceae;g__Acinetobacter;s__Acinetobacter bohemicus	Sichuan、Guizhou	0.0315123	0	0	0	0	0	0	0	0	0	0	0	0	0	0	0	0	0	0	0	0	0	0	0	0	0	0	0	0	0	0	0.280671	0	0	0	0	0	0	0	0	2.02051	0.204573	4.5509	0	0	0	0
MAG1019	d__Bacteria;p__Actinomycetota;c__Actinomycetia;o__Mycobacteriales;f__Mycobacteriaceae;g__Corynebacterium;s__Corynebacterium variabile	Sichuan、Jiangsu	0.0196877	0	0.285365	0	0	0	0	0	0	0	0	0	0	0	0	0	0	0	0	0	0.0426131	0	0.105325	0	0	0	0	0	0	0	0	0	0	0	0	0	0	0	0	0	0	0	0	0	0	0	0
MAG102	d__Bacteria;p__Tectomicrobia;c__Entotheonellia;o__Entotheonellales;f__Entotheonellaceae;g__SXND01;s__Unclassified	Guizhou、Yunnan	0	0	0	0	0	0	0	0	0	0	0	0	0	0	0	0	0	0	0	0	0	0	0	0	0	0.22574	0	0.141454	0.415449	0.533465	0.247732	0.228401	1.76359	0	0.689888	0.208615	0.708252	0	0.271053	0.221116	0	0.598855	0.28008	2.2536	2.74219	0.89815	0
MAG1020	d__Bacteria;p__Bacillota;c__Bacilli;o__Lactobacillales;f__Lactobacillaceae;g__Lactobacillus;s__Lactobacillus johnsonii	Sichuan、Yunnan、Jiangsu	0.355754	0	0.0270993	0	0	0.0430204	0	0	0	0	0	0	0.0870049	0.0242029	0.0942305	0	0	0.405916	0.04065	0	1.26966	0	0.0262122	0.127847	0	0	0	0	0	0	0	0	0	0	0	0	0	0	0	0	0	0	0	0	0	0	0
MAG1021	d__Archaea;p__Thermoproteota;c__Nitrososphaeria;o__Nitrososphaerales;f__Nitrososphaeraceae;g__TH1177;s__Unclassified	Guizhou、Yunnan、Jiangsu	0	0	0	0	0	0	0	0	0	0	0	0	0	0	0	0	0	0	0	0	0	0	0	0	0	0	0	1.41518	0	0.875891	0.16352	0	0.941807	0	0	0.297936	1.03601	0	0.306364	0	0	0	0	0.794056	1.41316	0	1.71135
MAG1022	d__Bacteria;p__Planctomycetota;c__Planctomycetia;o__Isosphaerales;f__Isosphaeraceae;g__Paludisphaera;s__Unclassified	Sichuan	0	0	0.172314	0	0	0	0	0	0	0	0	0	0	0	0	0	0	0	0	0	0	0	0	0	0	0	0	0	0	0	0	0	0	0	0	0	0	0	0	0	0	0	0	0	0	0	0
MAG1023	d__Bacteria;p__Acidobacteriota;c__Thermoanaerobaculia;o__UBA5704;f__UBA5704;g__UBA5704;s__Unclassified	Yunnan	0	0	0	0	0	0	0	0	0	0	0	0	0	0	0	0	0	0	0	0	0	0	0	0	0	0	0	0	0	0	0	0	0	0	0	0	0	0	0	0	0	0	0	0	0	0	0
MAG1024	d__Bacteria;p__Actinomycetota;c__Actinomycetia;o__Actinomycetales;f__Dermatophilaceae;g__Unclassified;s__Unclassified	Sichuan、Yunnan	0	0	0	0	0	0	0	0	0	0	0	0	0	0	0	0	0	0	0	0	0.00539484	0	1.24248	0	0	0	0	0	0	0	0	0	0	0	0	0	0	0	0	0	0	0	0	0	0	0	0
MAG1025	d__Bacteria;p__Chloroflexota;c__Chloroflexia;o__Thermomicrobiales;f__UBA6265;g__UBA6265;s__Unclassified	Sichuan、Yunnan	0	0	0	0	0	0	0	0	0	0	0	0	0	0	0	0	0	0	0	0	0	0	1.67346	0	0	0	0	0	0	0	0	0	0	0	0	0	0	0	0	0	0	0	0	0	0	0	0
MAG1026	d__Bacteria;p__Dormibacterota;c__Dormibacteria;o__Unclassified;f__Unclassified;g__Unclassified;s__Unclassified	Yunnan	0	0	0	0	0	0	0	0	0	0	0	0	0	0	0	0	0	0	0	0	0	0	0	0	0	0	0	0	0	0	0	0	0	0	0	0	0	0	0	0	0	0	0	0	0	0	0
MAG1027	d__Bacteria;p__Pseudomonadota;c__Gammaproteobacteria;o__Burkholderiales;f__Burkholderiaceae_C;g__SCQX01;s__Unclassified	Jiangsu	0	0	0	0	0	0	0	0	0	0	0	0	0	0	0	0	0	0	0	0	0	0	0	0	0	0	0	0	0	0	0	0	0	0	0	0	0	0	0	0	0	0	0	0	0	0	0
MAG1028	d__Bacteria;p__Actinomycetota;c__Actinomycetia;o__Actinomycetales;f__Micrococcaceae;g__Glutamicibacter;s__Glutamicibacter nicotianae	Sichuan、Jiangsu	0.109571	0	0.0204232	0	0	0	0	0	0	0	0	0	0	0	0	0	0	0	0	0	0	0	0	0	0	0	0	0	0	0	0	0	0	0	0	0	0	0	0	0	0	0	0	0	0	0	0
MAG1029	d__Bacteria;p__Pseudomonadota;c__Alphaproteobacteria;o__Sphingomonadales;f__Sphingomonadaceae;g__Sphingomicrobium;s__Unclassified	Jiangsu	0	0	0	0	0	0	0	0	0	0	0	0	0	0	0	0	0	0	0	0	0	0	0	0	0	0	0	0	0	0	0	0	0	0	0	0	0	0	0	0	0	0	0	0	0	0	0
MAG103	d__Bacteria;p__Acidobacteriota;c__Blastocatellia;o__Pyrinomonadales;f__Pyrinomonadaceae;g__Unclassified;s__Unclassified	Yunnan	0	0	0	0	0	0	0	0	0	0	0	0	0	0	0	0	0	0	0	0	0	0	0	0	0	0	0	0	0	0	0	0	0	0	0	0	0	0	0	0	0	0	0	0	0	0	0
MAG1030	d__Bacteria;p__Chloroflexota;c__Chloroflexia;o__Chloroflexales;f__Herpetosiphonaceae;g__Herpetosiphon;s__Herpetosiphon geysericola	Sichuan、Guizhou、Jiangsu	0	0	0	0	0	0	0	0.0965621	0.13192	0	0	0	0	0	0	0	0	0	0	0	0	0	0.673364	0	0	0	0	0	0	0	0	0	0	0	0	0	0	0	0	0	0	0.157583	0	0	0	0	0
MAG1031	d__Bacteria;p__Actinomycetota;c__Actinomycetia;o__Actinomycetales;f__Actinomycetaceae;g__KH17;s__Unclassified	Sichuan	0.0164732	0	0.71408	0	0	0	0	0	0	0	0	0	0	0	0	0	0	0	0.0640491	0	0.0113812	0	0.0397335	0	0	0	0	0	0	0	0	0	0	0	0	0	0	0	0	0	0	0	0	0	0	0	0
MAG1032	d__Bacteria;p__Actinomycetota;c__Actinomycetia;o__Actinomycetales;f__Dermabacteraceae;g__Brachybacterium;s__Brachybacterium sp012799425	Sichuan、Yunnan	0	0	0.318278	0	0	0	0	0.0781334	0	0	0	0	0.0372528	0.834411	0.540453	0	0	0.279394	0	0	0.996688	0	0.0296737	1.89394	0.641251	0	0	0	0	0	0	0	0	0	0	0	0	0	0	0	0	0	0	0	0	0	0
MAG1033	d__Bacteria;p__Bacteroidota;c__Bacteroidia;o__Flavobacteriales;f__Weeksellaceae;g__Planobacterium;s__Planobacterium lacus	Sichuan	0.054499	0	0.0139924	0	0	0	0	0	0	0	0	0	0.244921	0.286202	0.42565	0	0	0.0112535	0	0	0.036083	0	0.23795	0.0114494	0.0864034	0	0	0	0	0	0	0	0	0	0	0	0	0	0	0	0	0	0	0	0	0	0
MAG1034	d__Bacteria;p__Gemmatimonadota;c__Gemmatimonadetes;o__Gemmatimonadales;f__Gemmatimonadaceae;g__UBA4720;s__Unclassified	Sichuan	0	10.1609	0	0	0.279274	0	4.30872	0	0.140084	0.996033	0	0	0	0	0.0563207	0.546034	0	0	0	0.449466	0	0	0	0	0.164964	0	0	0	0	0	0	0	0	0	0	0	0	0	0	0	0	0	0	0	0	0	0
MAG1035	d__Bacteria;p__Actinomycetota;c__Actinomycetia;o__Actinomycetales;f__Cellulomonadaceae;g__Timonella;s__Unclassified	Sichuan、Yunnan	0	0	0	0	0	0	0	0	0	0	0	0	0.970535	0	0.0610345	0	0	0.155709	0	0	0.369848	0	0	0.39596	0	0	0	0	0	0	0	0	0	0	0	0	0	0	0	0	0	0	0	0	0	0	0
MAG1036	d__Bacteria;p__Pseudomonadota;c__Gammaproteobacteria;o__Burkholderiales;f__Casimicrobiaceae;g__VBCG01;s__Unclassified	Yunnan	0	0	0	0	0	0	0	0	0	0	0	0	0	0	0	0	0	0	0	0	0	0	0	0	0	0	0	0	0	0	0	0	0	0	0	0	0	0	0	0	0	0	0	0	0	0	0
MAG1037	d__Bacteria;p__Actinomycetota;c__Actinomycetia;o__Actinomycetales;f__Micrococcaceae;g__Arthrobacter;s__Unclassified	Yunnan	0	0	0	0	0	0	0	0	0	0	0	0	0	0	0	0	0	0	0	0	0	0	0	0	0	0	0	0	0	0	0	0	0	0	0	0	0	0	0	0	0	0	0	0	0	0	0
MAG1038	d__Bacteria;p__Bacillota;c__Bacilli;o__Bacillales;f__Planococcaceae;g__Sporosarcina;s__Sporosarcina quadrami	Sichuan	0	0	0	0	0	0	0	0	0	0	0	0	0.0142194	0	0	0	0	0.0153075	0	0	0	0	0	0.50019	0	0	0	0	0	0	0	0	0	0	0	0	0	0	0	0	0	0	0	0	0	0	0
MAG1039	d__Bacteria;p__Actinomycetota;c__Thermoleophilia;o__Solirubrobacterales;f__Solirubrobacteraceae;g__Unclassified;s__Unclassified	Sichuan、Guizhou、Yunnan、Jiangsu	0	0	0	0	0	0	0	0	0	0	0	0.0956083	0	0	0	0	0	0	0	0	0	0	0	0	0	0	0	0	0	0.183151	0	0	0	0	0	0	0	0	0	0	0	0	0	0	0	0	0.132184
MAG104	d__Bacteria;p__Pseudomonadota;c__Gammaproteobacteria;o__Burkholderiales;f__Casimicrobiaceae;g__VBCG01;s__Unclassified	Sichuan、Guizhou、Yunnan、Jiangsu	0	0.134492	0	0.0715756	0	0	0.189873	0	0	0.321934	0	0	0	0	0	0.0780824	0	0	0	0.201701	0	0	0	0	0	2.00658	0.499779	0.148175	1.2941	0.319209	1.62271	0.975724	1.89018	0.397533	1.63095	1.15272	0.93556	0.17344	1.26558	0.229611	1.87218	2.21409	1.09828	0.509495	1.07156	2.21833	0
MAG1040	d__Bacteria;p__Bacillota;c__Bacilli;o__Bacillales;f__Planococcaceae;g__Kurthia;s__Kurthia intestinigallinarum	Jiangsu	0	0	0	0	0	0	0	0	0	0	0	0	0	0	0	0	0	0	0	0	0	0	0	0	0	0	0	0	0	0	0	0	0	0	0	0	0	0	0	0	0	0	0	0	0	0	0
MAG1041	d__Bacteria;p__Actinomycetota;c__Actinomycetia;o__Actinomycetales;f__Actinomycetaceae;g__KH17;s__Unclassified	Sichuan	0.0710887	0	1.2422	0.11778	0	0	0	0	0	0	0	0	0	0	0	0	0	0	0.266515	0	0.00596233	0	0.0391297	0	0	0	0	0	0	0	0	0	0	0	0	0	0	0	0	0	0	0	0	0	0	0	0
MAG1042	d__Bacteria;p__Actinomycetota;c__Acidimicrobiia;o__Acidimicrobiales;f__JAFATL01;g__JAFATL01;s__Unclassified	Yunnan	0	0	0	0	0	0	0	0	0	0	0	0	0	0	0	0	0	0	0	0	0	0	0	0	0	0	0	0	0	0	0	0	0	0	0	0	0	0	0	0	0	0	0	0	0	0	0
MAG1043	d__Bacteria;p__Actinomycetota;c__Acidimicrobiia;o__Acidimicrobiales;f__AC-14;g__CADCTB01;s__Unclassified	Yunnan	0	0	0	0	0	0	0	0	0	0	0	0	0	0	0	0	0	0	0	0	0	0	0	0	0	0	0	0	0	0	0	0	0	0	0	0	0	0	0	0	0	0	0	0	0	0	0
MAG1044	d__Bacteria;p__Pseudomonadota;c__Gammaproteobacteria;o__Burkholderiales;f__Burkholderiaceae_B;g__JAEUPI01;s__Unclassified	Sichuan、Guizhou、Jiangsu	0	0.0997807	0	0	0.467372	0	0	0	0.252968	2.4697	0	0	0	0	0.117195	0.689645	0	0	0	2.49353	0	0.247279	0	0	0	0	0	0	0	0	0.144549	0	0	0	0	0	0	0	0	0	0	0	0	0	0	0	0
MAG1045	d__Bacteria;p__Actinomycetota;c__Actinomycetia;o__Actinomycetales;f__Dermatophilaceae;g__Pedococcus;s__Unclassified	Yunnan	0	0	0	0	0	0	0	0	0	0	0	0	0	0	0	0	0	0	0	0	0	0	0	0	0	0	0	0	0	0	0	0	0	0	0	0	0	0	0	0	0	0	0	0	0	0	0
MAG1046	d__Bacteria;p__Actinomycetota;c__Thermoleophilia;o__Solirubrobacterales;f__70-9;g__VAYN01;s__Unclassified	Sichuan	0	0	0	0	17.9915	0	0	0	0	0	0	0	0	0	0.0935678	17.8416	0	0	0	0	0	0.0789014	0	0	0.177904	0	0	0	0	0	0	0	0	0	0	0	0	0	0	0	0	0	0	0	0	0	0
MAG1047	d__Bacteria;p__Acidobacteriota;c__Blastocatellia;o__Pyrinomonadales;f__Pyrinomonadaceae;g__SXVE01;s__Unclassified	Sichuan	0	0	0	0	0	0	0	0.370476	0	0	0.712779	0	0	0	0.371701	0	4.24239	0	0	0	0	0.115789	0	0	0	0	0	0	0	0	0	0	0	0	0	0	0	0	0	0	0	0	0	0	0	0	0
MAG1048	d__Bacteria;p__Actinomycetota;c__Actinomycetia;o__Mycobacteriales;f__Mycobacteriaceae;g__Dietzia;s__Dietzia aerolata	Sichuan、Jiangsu	0	0	1.90478	0	0	0	0	0.107815	0	0	0	0	0	2.03521	0	0	0	0.00989295	0	0	0.0315682	0	0.113129	0.0305552	0	0	0	0	0	0	0	0	0	0	0	0	0	0	0	0	0	0	0	0	0	0	0
MAG1049	d__Bacteria;p__Actinomycetota;c__Acidimicrobiia;o__Acidimicrobiales;f__JADJXE01;g__Unclassified;s__Unclassified	Sichuan	0	0	0	0	0.200129	0	0	0	0.52306	2.37136	0	0	0	0	0	0.293922	0	0	0	1.79394	0	0.344606	0	0	0	0	0	0	0	0	0	0	0	0	0	0	0	0	0	0	0	0	0	0	0	0	0
MAG105	d__Bacteria;p__Cyanobacteriota;c__Cyanobacteriia;o__Cyanobacteriales;f__Microcoleaceae;g__Microcoleus;s__Microcoleus sp014695295	Sichuan、Guizhou、Yunnan、Jiangsu	0	0	0	0	0	0	0	0.0871138	0	0	0	0	0	0	0	0	0	0	0.0232807	0	0	0	0	0	0	0	0	2.12041	0	0.255391	0.718395	0.333221	0.346978	0	0	0.333703	0.221193	1.34168	0.470835	0.131559	0	0.365773	0.304704	0.176341	0	2.12849	5.22834
MAG1050	d__Bacteria;p__Pseudomonadota;c__Alphaproteobacteria;o__Sphingomonadales;f__Sphingomonadaceae;g__Allosphingosinicella;s__Unclassified	Yunnan	0	0	0	0	0	0	0	0	0	0	0	0	0	0	0	0	0	0	0	0	0	0	0	0	0	0	0	0	0	0	0	0	0	0	0	0	0	0	0	0	0	0	0	0	0	0	0
MAG1051	d__Bacteria;p__Pseudomonadota;c__Alphaproteobacteria;o__Rhodobacterales;f__Rhodobacteraceae;g__Paracoccus;s__Unclassified	Sichuan	0	0	0.0246165	0	0	0	0	0	0	0	0	0	0.220701	0	0	0	0	0.0236573	0	0	0.0694319	0	0	0.238349	0	0	0	0	0	0	0	0	0	0	0	0	0	0	0	0	0	0	0	0	0	0	0
MAG1052	d__Bacteria;p__Bacillota;c__Bacilli;o__Erysipelotrichales;f__Erysipelotrichaceae;g__JAAZDN01;s__Unclassified	Sichuan	0	0	0	0	0	0	0	0	0	0	0	0	0.0450037	0	0	0	0	0.030773	0	0	0.642551	0	0	0	0	0	0	0	0	0	0	0	0	0	0	0	0	0	0	0	0	0	0	0	0	0	0
MAG1053	d__Archaea;p__Thermoproteota;c__Nitrososphaeria;o__Nitrososphaerales;f__Nitrososphaeraceae;g__Nitrosocosmicus;s__Nitrosocosmicus oleophilus	Sichuan、Guizhou、Yunnan、Jiangsu	0	0.0708976	0	0.0763273	0.526788	0.0461062	0.228137	0	1.15044	0.644836	0	0.339668	0	0	0.116693	0.703646	0	0	0	0.661324	0	0.393532	0	0	0.121	0.309358	0.168823	0.391719	0.712442	0.479331	0.730999	0.178372	0.11695	0.455368	0.636814	0.591128	0.321079	0.192841	0.638269	0.987857	0.803715	0.458761	0.262213	0.352094	0.403391	0.459019	0.119461
MAG1054	d__Bacteria;p__Acidobacteriota;c__Thermoanaerobaculia;o__Gp7-AA8;f__Gp7-AA8;g__QHVT01;s__Unclassified	Yunnan	0	0	0	0	0	0	0	0	0	0	0	0	0	0	0	0	0	0	0	0	0	0	0	0	0	0	0	0	0	0	0	0	0	0	0	0	0	0	0	0	0	0	0	0	0	0	0
MAG1055	d__Bacteria;p__Bacillota;c__Bacilli;o__Staphylococcales;f__Salinicoccaceae;g__Jeotgalicoccus;s__Unclassified	Sichuan、Yunnan	0.0151207	0	0.300844	0	0.110116	0	0	0.0651033	0	0	0	0	0.427426	0.0450392	0.572272	0.160516	0	6.2772	0	0	1.84458	0	0.0662014	6.257	0.747471	0	0	0	0	0	0	0	0	0	0	0	0	0	0	0	0	0	0	0	0	0	0
MAG1056	d__Bacteria;p__Pseudomonadota;c__Alphaproteobacteria;o__Sphingomonadales;f__Sphingomonadaceae;g__Allosphingosinicella;s__Unclassified	Sichuan、Yunnan、Jiangsu	0	0	0	0	0	0	0	0	0	0.121115	0	0	0	0	0	0	0	0	0	0.0941189	0	0	0	0	0	0	0	0	0	0	0	0	0	0	0	0	0	0	0	0	0	0	0	0	0	0	0
MAG1057	d__Bacteria;p__Actinomycetota;c__Actinomycetia;o__Jiangellales;f__Unclassified;g__Unclassified;s__Unclassified	Sichuan、Guizhou	0	0	0	0	0	0	0	0	0	0	0	2.30987	0	0	0	0	0	0	0	0.109601	0	0.458235	0	0	0	0	0	0.707866	0	2.2858	0.658478	0	0	0	0	0	0	0.953105	0	0.0904075	0.136312	0	0	0	0	0	0.305672
MAG1058	d__Bacteria;p__Pseudomonadota;c__Gammaproteobacteria;o__Pseudomonadales;f__Pseudomonadaceae;g__Halopseudomonas;s__Unclassified	Sichuan	0	0	0.00839098	0	0	0	0	0	0	0	0	0	0.0355114	0.520961	0	0	0	0	0	0	0	0	0	0.0923653	0	0	0	0	0	0	0	0	0	0	0	0	0	0	0	0	0	0	0	0	0	0	0
MAG1059	d__Bacteria;p__Pseudomonadota;c__Gammaproteobacteria;o__Diplorickettsiales;f__Diplorickettsiaceae;g__Aquirickettsiella;s__Unclassified	Sichuan	0	0	0	1.33649	0.109769	1.13431	1.58806	0	0.451842	0.253369	0	0	0	0	0.148059	0.193546	0	0	0	0.0946024	0	0	0	0	2.91253	0	0	0	0	0	0	0	0	0	0	0	0	0	0	0	0	0	0	0	0	0	0
MAG106	d__Bacteria;p__Verrucomicrobiota;c__Verrucomicrobiae;o__Chthoniobacterales;f__UBA10450;g__Udaeobacter;s__Unclassified	Jiangsu	0	0	0	0	0	0	0	0	0	0	0	0	0	0	0	0	0	0	0	0	0	0	0	0	0	0	0	0	0	0	0	0	0	0	0	0	0	0	0	0	0	0	0	0	0	0	0
MAG1060	d__Bacteria;p__Chloroflexota;c__UBA6077;o__UBA6077;f__CF-72;g__Unclassified;s__Unclassified	Yunnan	0	0	0	0	0	0	0	0	0	0	0	0	0	0	0	0	0	0	0	0	0	0	0	0	0	0	0	0	0	0	0	0	0	0	0	0	0	0	0	0	0	0	0	0	0	0	0
MAG1061	d__Bacteria;p__Actinomycetota;c__Actinomycetia;o__Propionibacteriales;f__Propionibacteriaceae;g__Microlunatus;s__Unclassified	Sichuan、Guizhou、Yunnan	0.040734	0.197449	0	3.1654	0.105844	0.320545	1.35572	0.0821683	1.32357	0.294329	1.45388	0	0	0	0.152716	0	0.192662	0	0.585489	0.196072	0	0.334519	0	0	1.0949	0	0	0	0	0	0	0	0	0	0	0	0	0	0.399405	0	0	0	0	0	0	0	0
MAG1062	d__Bacteria;p__Acidobacteriota;c__Blastocatellia;o__Pyrinomonadales;f__Pyrinomonadaceae;g__QHXN01;s__Unclassified	Yunnan	0	0	0	0	0	0	0	0	0	0	0	0	0	0	0	0	0	0	0	0	0	0	0	0	0	0	0	0	0	0	0	0	0	0	0	0	0	0	0	0	0	0	0	0	0	0	0
MAG1063	d__Bacteria;p__Bacteroidota;c__Bacteroidia;o__Sphingobacteriales;f__Sphingobacteriaceae;g__Sphingobacterium;s__Unclassified	Sichuan、Jiangsu	0.348642	0	0.343786	0.0790018	0	0.0856741	0	0	0	0	0	0	0	0.0568684	0	0	0	0	0.0881411	0	0	0	0.467767	0	0	0	0	0	0	0	0	0	0	0	0	0	0	0	0	0	0	0	0	0	0	0	0
MAG1064	d__Bacteria;p__Acidobacteriota;c__Thermoanaerobaculia;o__Gp7-AA8;f__Gp7-AA8;g__QHVT01;s__Unclassified	Yunnan	0	0	0	0	0	0	0	0	0	0	0	0	0	0	0	0	0	0	0	0	0	0	0	0	0	0	0	0	0	0	0	0	0	0	0	0	0	0	0	0	0	0	0	0	0	0	0
MAG1065	d__Bacteria;p__Chloroflexota;c__Limnocylindria;o__QHBO01;f__QHBO01;g__JACDBZ01;s__Unclassified	Jiangsu	0	0	0	0	0	0	0	0	0	0	0	0	0	0	0	0	0	0	0	0	0	0	0	0	0	0	0	0	0	0	0	0	0	0	0	0	0	0	0	0	0	0	0	0	0	0	0
MAG1066	d__Bacteria;p__Pseudomonadota;c__Alphaproteobacteria;o__Reyranellales;f__Unclassified;g__Unclassified;s__Unclassified	Sichuan、Guizhou	0	2.61826	0	0	0.0760126	0	0.188009	0	0	0	0	0	0	0	0	0.0765753	0	0	0	0	0	0	0	0	0.16093	0	0.3643	0	0	0	0	0	0	0	0	0	0	0	0	0	0	0	0	0	0	0	0
MAG1067	d__Bacteria;p__Pseudomonadota;c__Gammaproteobacteria;o__Xanthomonadales;f__Xanthomonadaceae;g__Pseudoxanthomonas_A;s__Unclassified	Sichuan、Guizhou、Jiangsu	0	0	0	0	0.170651	0	0	0.261922	0	0.109087	0	0.207043	0	0	0	0.271465	0	0	0	0	0	0	0	0	0	0.619419	1.39121	0.378156	0	0	0.172715	0.656711	0	0	0	0	0.274292	1.78961	0	0.215657	0.561712	0.485357	3.84356	0.119674	0	0.167506	0
MAG1068	d__Archaea;p__Thermoproteota;c__Nitrososphaeria;o__Nitrososphaerales;f__Nitrososphaeraceae;g__TA-21;s__Unclassified	Guizhou、Yunnan、Jiangsu	0	0	0	0	0	0	0	0	0	0	0	0	0	0	0	0	0	0	0	0	0	0	0	0	0	0.743974	0.141204	1.16666	0.698173	2.91611	1.04751	0.265691	9.93486	0.209488	1.26112	1.10408	3.36413	0	0.979267	0.369316	0	0.182699	0.219201	7.41476	10.0931	0.42246	0.680238
MAG1069	d__Bacteria;p__Pseudomonadota;c__Gammaproteobacteria;o__Xanthomonadales;f__Xanthomonadaceae;g__Lysobacter_B;s__Lysobacter_B sp011300685	Sichuan、Guizhou、Yunnan	0.100041	0.21569	0	0.175567	0.289943	0.146017	1.09397	0.438773	1.43812	1.05823	0	0	0	0	0	0.398199	0	0	1.02232	0.174365	0	4.5276	0.418942	0	0.377478	0	0	0	0	0	0	0	0	0	0	0	0	0	0	0	0	0.547497	0	0	0	0	0
MAG107	d__Bacteria;p__Actinomycetota;c__Actinomycetia;o__Actinomycetales;f__Micrococcaceae;g__Sinomonas;s__Unclassified	Yunnan	0	0	0	0	0	0	0	0	0	0	0	0	0	0	0	0	0	0	0	0	0	0	0	0	0	0	0	0	0	0	0	0	0	0	0	0	0	0	0	0	0	0	0	0	0	0	0
MAG1070	d__Bacteria;p__Actinomycetota;c__Thermoleophilia;o__Solirubrobacterales;f__70-9;g__VAYN01;s__Unclassified	Guizhou、Jiangsu	0	0	0	0	0	0	0	0	0	0	0	0	0	0	0	0	0	0	0	0	0	0	0	0	0	1.40116	3.65627	0	0	0	0.140073	0	0	0	0.26457	0	0	0	0	0.221972	0	0	0	0	0	0	0.101786
MAG1071	d__Bacteria;p__Actinomycetota;c__UBA4738;o__UBA4738;f__HRBIN12;g__Unclassified;s__Unclassified	Sichuan、Guizhou、Jiangsu	0	0.211611	0	0	0.620237	0	0	0	0.243015	0.951626	0	3.61095	0	0	0.0500697	0.772581	0	0	0	0.683766	0	0	0	0	0	0.566111	0.295178	0	0	0	0.271885	0	0.522727	0	0.61278	0	0.258629	0.391382	0	0.17296	0.109592	0	0	0.157536	0.303858	0	0
MAG1072	d__Bacteria;p__Pseudomonadota;c__Alphaproteobacteria;o__Rhizobiales;f__Rhizobiaceae;g__Aquamicrobium_A;s__Unclassified	Sichuan	0.0299025	0	0.115709	0	0	0	0	0	0	0	0	0	0	0.046626	0	0	0	0	0	0	0	0	0.433151	0	0	0	0	0	0	0	0	0	0	0	0	0	0	0	0	0	0	0	0	0	0	0	0
MAG1073	d__Bacteria;p__Actinomycetota;c__Actinomycetia;o__Propionibacteriales;f__Propionibacteriaceae;g__Aestuariimicrobium;s__Aestuariimicrobium sp017355265	Sichuan、Jiangsu	0.258124	0	0	0.187682	0	0	0	0.0603918	0.108296	0	0	0	0	0	0	0	0	0	0.544733	0	0	0	0.0555598	0	0	0	0	0	0	0	0	0	0	0	0	0	0	0	0	0	0	0	0	0	0	0	0
MAG1074	d__Bacteria;p__Acidobacteriota;c__Blastocatellia;o__Pyrinomonadales;f__Pyrinomonadaceae;g__Unclassified;s__Unclassified	Yunnan	0	0	0	0	0	0	0	0	0	0	0	0	0	0	0	0	0	0	0	0	0	0	0	0	0	0	0	0	0	0	0	0	0	0	0	0	0	0	0	0	0	0	0	0	0	0	0
MAG1075	d__Bacteria;p__Chloroflexota;c__Limnocylindria;o__Limnocylindrales;f__CSP1-4;g__SPCO01;s__Unclassified	Guizhou、Jiangsu	0	0	0	0	0	0	0	0	0	0	0	0	0	0	0	0	0	0	0	0	0	0	0	0	0	0	0	0	0	0	0.115485	0	0	0	0	0	0	0.195544	0	0	0	0	0	0	0	0	0
MAG1076	d__Bacteria;p__Actinomycetota;c__Actinomycetia;o__Actinomycetales;f__Microbacteriaceae;g__Microbacterium;s__Unclassified	Jiangsu	0	0	0	0	0	0	0	0	0	0	0	0	0	0	0	0	0	0	0	0	0	0	0	0	0	0	0	0	0	0	0	0	0	0	0	0	0	0	0	0	0	0	0	0	0	0	0
MAG1077	d__Bacteria;p__Bacteroidota;c__Bacteroidia;o__Chitinophagales;f__Chitinophagaceae;g__Flavisolibacter;s__Unclassified	Guizhou、Yunnan	0	0	0	0	0	0	0	0	0	0	0	0	0	0	0	0	0	0	0	0	0	0	0	0	0	0	0	0	0.701671	0	0	0	0	1.18101	0	0.658073	0	0	0.45768	0	0	0	0	0	0	0	0
MAG1078	d__Bacteria;p__Actinomycetota;c__Actinomycetia;o__Actinomycetales;f__Microbacteriaceae;g__Yonghaparkia;s__Unclassified	Guizhou、Jiangsu	0	0	0	0	0	0	0	0	0	0	0	0	0	0	0	0	0	0	0	0	0	0	0	0	0	0	0	0	0	0	0	0	0	0	0	0	0	0	0	0	0	0	0	0	0	0	0.0727436
MAG1079	d__Bacteria;p__Acidobacteriota;c__Blastocatellia;o__Pyrinomonadales;f__Pyrinomonadaceae;g__UBA11740;s__Unclassified	Yunnan	0	0	0	0	0	0	0	0	0	0	0	0	0	0	0	0	0	0	0	0	0	0	0	0	0	0	0	0	0	0	0	0	0	0	0	0	0	0	0	0	0	0	0	0	0	0	0
MAG108	d__Bacteria;p__Bacillota;c__Bacilli;o__Bacillales_K;f__Sporolactobacillaceae;g__Unclassified;s__Unclassified	Sichuan	0	0	0	0.139817	0	12.6181	0	0	0	0	0	0	0	0	0	0	0	0	0	0	0	0	0	0	0	0	0	0	0	0	0	0	0	0	0	0	0	0	0	0	0	0	0	0	0	0	0
MAG1080	d__Bacteria;p__Actinomycetota;c__Actinomycetia;o__Mycobacteriales;f__Jatrophihabitantaceae;g__QHCC01;s__Unclassified	Yunnan	0	0	0	0	0	0	0	0	0	0	0	0	0	0	0	0	0	0	0	0	0	0	0	0	0	0	0	0	0	0	0	0	0	0	0	0	0	0	0	0	0	0	0	0	0	0	0
MAG1081	d__Bacteria;p__Desulfobacterota_B;c__Binatia;o__UBA9968;f__UBA9968;g__DP-20;s__Unclassified	Guizhou、Yunnan、Jiangsu	0	0	0	0	0	0	0	0	0	0	0	0	0	0	0	0	0	0	0	0	0	0	0	0	0	0	0	0	2.31392	0.152677	0	0.0750868	0	12.111	0	2.03961	0.186852	0	1.38529	0.224169	0	0	0	0	0	0.118986	0
MAG1082	d__Bacteria;p__Acidobacteriota;c__Thermoanaerobaculia;o__UBA5704;f__UBA5704;g__UBA5704;s__Unclassified	Yunnan、Jiangsu	0	0	0	0	0	0	0	0	0	0	0	0	0	0	0	0	0	0	0	0	0	0	0	0	0	0	0	0	0	0	0	0	0	0	0	0	0	0	0	0	0	0	0	0	0	0	0
MAG1083	d__Bacteria;p__Actinomycetota;c__Actinomycetia;o__Actinomycetales;f__Dermatophilaceae;g__Pedococcus;s__Unclassified	Yunnan	0	0	0	0	0	0	0	0	0	0	0	0	0	0	0	0	0	0	0	0	0	0	0	0	0	0	0	0	0	0	0	0	0	0	0	0	0	0	0	0	0	0	0	0	0	0	0
MAG1084	d__Bacteria;p__Cyanobacteriota;c__Cyanobacteriia;o__Cyanobacteriales;f__Coleofasciculaceae;g__Unclassified;s__Unclassified	Guizhou、Jiangsu	0	0	0	0	0	0	0	0	0	0	0	0	0	0	0	0	0	0	0	0	0	0	0	0	0	0	0	0	0	0	0	0	0	0	0	0	0	0	0	0	0	0	0	0	0	0	0.207103
MAG1085	d__Bacteria;p__Bacillota;c__Bacilli;o__Lactobacillales;f__Lactobacillaceae;g__Limosilactobacillus;s__Limosilactobacillus ingluviei	Sichuan	0.0710153	0	0.00613791	0	0	0	0	0	0	0	0	0	0.0239315	0	0.071313	0	0	0	0.0173969	0	0.404798	0	0	0	0	0	0	0	0	0	0	0	0	0	0	0	0	0	0	0	0	0	0	0	0	0	0
MAG1086	d__Bacteria;p__Acidobacteriota;c__Blastocatellia;o__Pyrinomonadales;f__Pyrinomonadaceae;g__OLB17;s__Unclassified	Sichuan	0	0	0	0	0	0	0	0	0	0	0	3.83586	0	0	0	0	0	0	0	0	0	0	0	0	0	0	0	0	0	0	0	0	0	0	0	0	0	0	0	0	0	0	0	0	0	0	0
MAG1087	d__Bacteria;p__Pseudomonadota;c__Alphaproteobacteria;o__Rhizobiales;f__Xanthobacteraceae;g__Bradyrhizobium;s__Unclassified	Yunnan	0	0	0	0	0	0	0	0	0	0	0	0	0	0	0	0	0	0	0	0	0	0	0	0	0	0	0	0	0	0	0	0	0	0	0	0	0	0	0	0	0	0	0	0	0	0	0
MAG1088	d__Bacteria;p__Dormibacterota;c__Dormibacteria;o__Dormibacterales;f__Dormibacteraceae;g__Unclassified;s__Unclassified	Yunnan	0	0	0	0	0	0	0	0	0	0	0	0	0	0	0	0	0	0	0	0	0	0	0	0	0	0	0	0	0	0	0	0	0	0	0	0	0	0	0	0	0	0	0	0	0	0	0
MAG1089	d__Bacteria;p__Actinomycetota;c__Thermoleophilia;o__Gaiellales;f__Gaiellaceae;g__JACCRW01;s__Unclassified	Guizhou、Yunnan	0	0	0	0	0	0	0	0	0	0	0	0	0	0	0	0	0	0	0	0	0	0	0	0	0	0	0	0	0	0	0	0	0	0.226585	0	0	0	0	0	0	0	0	0	0	0	0	0
MAG109	d__Bacteria;p__Gemmatimonadota;c__Gemmatimonadetes;o__Gemmatimonadales;f__Gemmatimonadaceae;g__JABFXC01;s__Unclassified	Guizhou、Yunnan	0	0	0	0	0	0	0	0	0	0	0	0	0	0	0	0	0	0	0	0	0	0	0	0	0	0	0	0	0	0	0	0	0	0.613757	0	0.301393	0	0	0	0	0	0	0	0	0	0	0
MAG1090	d__Bacteria;p__Patescibacteria;c__Saccharimonadia;o__Saccharimonadales;f__Unclassified;g__Unclassified;s__Unclassified	Sichuan	0	0	0	0	0	0	0	0	0	0	0	0	0	0	0	0	0	0	0	0	0	0	0.995844	0	0	0	0	0	0	0	0	0	0	0	0	0	0	0	0	0	0	0	0	0	0	0	0
MAG1091	d__Bacteria;p__Armatimonadota;c__Fimbriimonadia;o__Fimbriimonadales;f__Fimbriimonadaceae;g__Unclassified;s__Unclassified	Yunnan	0	0	0	0	0	0	0	0	0	0	0	0	0	0	0	0	0	0	0	0	0	0	0	0	0	0	0	0	0	0	0	0	0	0	0	0	0	0	0	0	0	0	0	0	0	0	0
MAG1092	d__Bacteria;p__Pseudomonadota;c__Alphaproteobacteria;o__Sphingomonadales;f__Sphingomonadaceae;g__Allosphingosinicella;s__Unclassified	Jiangsu	0	0	0	0	0	0	0	0	0	0	0	0	0	0	0	0	0	0	0	0	0	0	0	0	0	0	0	0	0	0	0	0	0	0	0	0	0	0	0	0	0	0	0	0	0	0	0
MAG1093	d__Bacteria;p__Pseudomonadota;c__Alphaproteobacteria;o__Sphingomonadales;f__Sphingomonadaceae;g__Sphingomicrobium;s__Unclassified	Yunnan	0	0	0	0	0	0	0	0	0	0	0	0	0	0	0	0	0	0	0	0	0	0	0	0	0	0	0	0	0	0	0	0	0	0	0	0	0	0	0	0	0	0	0	0	0	0	0
MAG1094	d__Bacteria;p__Bacteroidota;c__Bacteroidia;o__Sphingobacteriales;f__Sphingobacteriaceae;g__Sphingobacterium;s__Unclassified	Sichuan	0	0	0	0	0	0	0	0	0	0	0	0	0.656113	0.0524667	0	0	0	0.0254884	0	0	0.0664819	0	0	0.308207	0.28982	0	0	0	0	0	0	0	0	0	0	0	0	0	0	0	0	0	0	0	0	0	0
MAG1095	d__Bacteria;p__Cyanobacteriota;c__Cyanobacteriia;o__Cyanobacteriales;f__Microcoleaceae;g__Microcoleus;s__Unclassified	Sichuan、Guizhou、Yunnan、Jiangsu	0	0	0	0	0	0	0	0.0663821	0	0	0	0	0	0	0	0	0	0	0	0	0	0	0	0	0	0	0	1.02846	0	0.111082	0.551997	0.337925	0.343737	0	0	0.311931	0.142308	1.30416	0.43069	0	0	0.273137	0.348183	0.123004	0	1.69868	1.89808
MAG1096	d__Bacteria;p__Gemmatimonadota;c__Gemmatimonadetes;o__Gemmatimonadales;f__Gemmatimonadaceae;g__JADGGM01;s__Unclassified	Jiangsu	0	0	0	0	0	0	0	0	0	0	0	0	0	0	0	0	0	0	0	0	0	0	0	0	0	0	0	0	0	0	0	0	0	0	0	0	0	0	0	0	0	0	0	0	0	0	0
MAG1097	d__Bacteria;p__Actinomycetota;c__Actinomycetia;o__Actinomycetales;f__Micrococcaceae;g__Arthrobacter_H;s__Arthrobacter_H sp016892645	Sichuan	0.178865	0	0	1.54395	0	1.30416	0.198392	0	0	0	0	0	0	0	0	0	0	0	0.0943491	0	0	0	0	0	0.153676	0	0	0	0	0	0	0	0	0	0	0	0	0	0	0	0	0	0	0	0	0	0
MAG1098	d__Bacteria;p__Pseudomonadota;c__Gammaproteobacteria;o__Pseudomonadales;f__Moraxellaceae;g__Acinetobacter;s__Acinetobacter brisouii	Jiangsu	0	0	0	0	0	0	0	0	0	0	0	0	0	0	0	0	0	0	0	0	0	0	0	0	0	0	0	0	0	0	0	0	0	0	0	0	0	0	0	0	0	0	0	0	0	0	0
MAG1099	d__Bacteria;p__Actinomycetota;c__Actinomycetia;o__Propionibacteriales;f__Propionibacteriaceae;g__Arachnia;s__Unclassified	Sichuan、Yunnan	0.238815	0	0.0845165	0.0734651	0	0	0	0	0	0	0	0	0	0	0.0513426	0	0	0	0.24708	0	0	0	3.14648	0	0	0	0	0	0	0	0	0	0	0	0	0	0	0	0	0	0	0	0	0	0	0	0
MAG11	d__Bacteria;p__Planctomycetota;c__Planctomycetia;o__Planctomycetales;f__Planctomycetaceae;g__JACCRE01;s__Unclassified	Sichuan	0.0112014	0	0.176545	0	0	0	0	0	0	0	0	0	0	0	0	0	0	0	0	0	0	0	0.0187936	0	0	0	0	0	0	0	0	0	0	0	0	0	0	0	0	0	0	0	0	0	0	0	0
MAG110	d__Bacteria;p__Acidobacteriota;c__Vicinamibacteria;o__Vicinamibacterales;f__SCN-69-37;g__Unclassified;s__Unclassified	Guizhou	0	0	0	0	0	0	0	0	0	0	0	0	0	0	0	0	0	0	0	0	0	0	0	0	0	0	0	0.188653	0	0.228254	0	0	1.88344	0	0	0	0.811001	0	0	0	0	0	0	9.66095	3.58233	0	0
MAG1100	d__Bacteria;p__Pseudomonadota;c__Gammaproteobacteria;o__Xanthomonadales;f__Rhodanobacteraceae;g__Dyella;s__Unclassified	Yunnan	0	0	0	0	0	0	0	0	0	0	0	0	0	0	0	0	0	0	0	0	0	0	0	0	0	0	0	0	0	0	0	0	0	0	0	0	0	0	0	0	0	0	0	0	0	0	0
MAG1101	d__Bacteria;p__Actinomycetota;c__Thermoleophilia;o__Gaiellales;f__Gaiellaceae;g__JACCRW01;s__Unclassified	Guizhou、Yunnan	0	0	0	0	0	0	0	0	0	0	0	0	0	0	0	0	0	0	0	0	0	0	0	0	0	0	0	0	0	0	0	0	0	0.242057	0	0	0	0	0	0	0	0	0	0	0	0	0
MAG1102	d__Bacteria;p__Actinomycetota;c__Actinomycetia;o__Actinomycetales;f__Dermatophilaceae;g__F2B08;s__Unclassified	Guizhou、Jiangsu	0	0	0	0	0	0	0	0	0	0	0	0	0	0	0	0	0	0	0	0	0	0	0	0	0	0	0	0	0	0	0.25331	0	0	0	0	0	0	0	0	0.161371	0.292434	0	0	0	0	0	0
MAG1103	d__Bacteria;p__Actinomycetota;c__Rubrobacteria;o__Rubrobacterales;f__Rubrobacteraceae;g__Rubrobacter_D;s__Unclassified	Sichuan、Guizhou、Yunnan、Jiangsu	0	0	0	0	0	0	0	0.0955109	0	0	0	0	0	0	0	0	0.0668434	0	0	0	0	0	0	0	0	0	0	0.201921	0	0	0	0	0	0	0	0	0	1.3757	0	0	0	0	0	0	0	0	0.147498
MAG1104	d__Bacteria;p__Pseudomonadota;c__Alphaproteobacteria;o__Rhodobacterales;f__Rhodobacteraceae;g__Paracoccus;s__Paracoccus sp002359815	Sichuan	0	0	0.258252	0	0	0	0	0	0	0	0	0	0	0.0202756	0	0	0	0	0	0	0	0	0	0	0	0	0	0	0	0	0	0	0	0	0	0	0	0	0	0	0	0	0	0	0	0	0
MAG1105	d__Bacteria;p__Actinomycetota;c__Actinomycetia;o__Propionibacteriales;f__Propionibacteriaceae;g__Arachnia;s__Unclassified	Sichuan	0.0257349	0	0.509602	0	0	0	0	0	0	0	0	0	0	0.0524515	0	0	0	0	0	0	0	0	0.075326	0	0	0	0	0	0	0	0	0	0	0	0	0	0	0	0	0	0	0	0	0	0	0	0
MAG1106	d__Bacteria;p__Bacteroidota;c__Bacteroidia;o__Flavobacteriales;f__Weeksellaceae;g__Kaistella;s__Unclassified	Sichuan	0	0	0	0	0	0	0	0	0	0	0	0	0	0.229099	0	0	0	0	0	0	0	0	1.29504	0	0	0	0	0	0	0	0	0	0	0	0	0	0	0	0	0	0	0	0	0	0	0	0
MAG1107	d__Bacteria;p__Patescibacteria;c__Saccharimonadia;o__Saccharimonadales;f__UBA10212;g__JAIFWC01;s__Unclassified	Guizhou、Yunnan	0	0	0	0	0	0	0	0	0	0	0	0	0	0	0	0	0	0	0	0	0	0	0	0	0	0	0	0	0.436456	0	0	0	0	0.618594	0	0.292098	0	0	0	0	0	0	0	0	0	0	0
MAG1108	d__Archaea;p__Thermoproteota;c__Nitrososphaeria;o__Nitrososphaerales;f__Nitrososphaeraceae;g__Nitrosocosmicus;s__Nitrosocosmicus oleophilus	Sichuan、Guizhou、Yunnan、Jiangsu	0	0.0795957	0	0.0772963	0.597251	0.0457394	0.249027	0	0.946593	0.750072	0	0.376282	0	0	0.133985	0.917649	0	0	0	0.753731	0	0.406607	0	0	0.142377	0.345647	0.216517	0.415552	0.731357	0.516269	0.821299	0.192656	0.13567	0.468406	0.723625	0.607787	0.359596	0.213223	0.689487	1.08078	0.90029	0.510189	0.289145	0.385947	0.443353	0.502525	0.130207
MAG1109	d__Bacteria;p__Pseudomonadota;c__Alphaproteobacteria;o__Sphingomonadales;f__Sphingomonadaceae;g__Sphingomonas_I;s__Unclassified	Yunnan	0	0	0	0	0	0	0	0	0	0	0	0	0	0	0	0	0	0	0	0	0	0	0	0	0	0	0	0	0	0	0	0	0	0	0	0	0	0	0	0	0	0	0	0	0	0	0
MAG111	d__Bacteria;p__Deinococcota;c__Deinococci;o__Deinococcales;f__Trueperaceae;g__Unclassified;s__Unclassified	Sichuan	0.0150944	0	0.0297531	0	0.0978061	0	0	0	0	0	0	0	0.0428066	0.625815	1.43687	0.0809853	0	0.00731002	0	0	0.0238429	0	0.0137061	0	0.253882	0	0	0	0	0	0	0	0	0	0	0	0	0	0	0	0	0	0	0	0	0	0
MAG1110	d__Bacteria;p__Bacillota;c__Bacilli;o__Lactobacillales;f__Vagococcaceae;g__Vagococcus;s__Unclassified	Sichuan	0	0	0	0	0	0	0	0	0	0	0	0	0.0505618	0	0	0	0	0.322481	0	0	0.12527	0	0	0	0	0	0	0	0	0	0	0	0	0	0	0	0	0	0	0	0	0	0	0	0	0	0
MAG1111	d__Bacteria;p__Pseudomonadota;c__Alphaproteobacteria;o__Sphingomonadales;f__Sphingomonadaceae;g__Sphingomonas_O;s__Unclassified	Sichuan	0	0.0705439	0	0	0	0	0	1.59836	1.73484	0.279103	0.240319	0	0	0	2.67932	0	2.85644	0	0	0.251162	0	0.574457	0	0	0	0	0	0	0	0	0	0	0	0	0	0	0	0	0	0	0	0	0	0	0	0	0
MAG1112	d__Bacteria;p__Chloroflexota;c__Limnocylindria;o__Limnocylindrales;f__CSP1-4;g__SPCO01;s__Unclassified	Guizhou、Jiangsu	0	0	0	0	0	0	0	0	0	0	0	0	0	0	0	0	0	0	0	0	0	0	0	0	0	0	0.115658	0	0	0	0.147749	0	0	0	0	0	0	0.2461	0	0.103598	0	0.0857908	0	0	0	0	0.0521922
MAG1113	d__Bacteria;p__Chloroflexota;c__Anaerolineae;o__Anaerolineales;f__EnvOPS12;g__UBA12294;s__Unclassified	Guizhou、Jiangsu	0	0	0	0	0	0	0	0	0	0	0	0	0	0	0	0	0	0	0	0	0	0	0	0	0	0	0	0	0	0	0	0	0	0	0	0	0	1.69063	0	0	0	0	0	0	0	0	0.0997156
MAG1114	d__Bacteria;p__Pseudomonadota;c__Alphaproteobacteria;o__Rhizobiales;f__Xanthobacteraceae;g__Bradyrhizobium;s__Unclassified	Yunnan	0	0	0	0	0	0	0	0	0	0	0	0	0	0	0	0	0	0	0	0	0	0	0	0	0	0	0	0	0	0	0	0	0	0	0	0	0	0	0	0	0	0	0	0	0	0	0
MAG1115	d__Bacteria;p__Actinomycetota;c__Actinomycetia;o__Actinomycetales;f__Micrococcaceae;g__Glutamicibacter;s__Glutamicibacter sp004320535	Sichuan	0.819938	0	0	0.264917	0	0	0	0	0	0	0	0	0	0	0	0	0	0	0.542708	0	0	0	0.0206917	0	0	0	0	0	0	0	0	0	0	0	0	0	0	0	0	0	0	0	0	0	0	0	0
MAG1116	d__Bacteria;p__Actinomycetota;c__Actinomycetia;o__Mycobacteriales;f__Mycobacteriaceae;g__Corynebacterium;s__Corynebacterium marinum	Sichuan	1.4417	0	0.0448212	0.360367	0	0	0	0	0	0	0	0	0	0	0	0	0	0	0.789996	0	0	0	0.0852831	0	0	0	0	0	0	0	0	0	0	0	0	0	0	0	0	0	0	0	0	0	0	0	0
MAG1117	d__Bacteria;p__Verrucomicrobiota;c__Verrucomicrobiae;o__Chthoniobacterales;f__UBA10450;g__AV80;s__Unclassified	Jiangsu	0	0	0	0	0	0	0	0	0	0	0	0	0	0	0	0	0	0	0	0	0	0	0	0	0	0	0	0	0	0	0	0	0	0	0	0	0	0	0	0	0	0	0	0	0	0	0
MAG1118	d__Bacteria;p__Chloroflexota;c__Chloroflexia;o__Thermomicrobiales;f__UBA6265;g__JAMLHN01;s__Unclassified	Jiangsu	0	0	0	0	0	0	0	0	0	0	0	0	0	0	0	0	0	0	0	0	0	0	0	0	0	0	0	0	0	0	0	0	0	0	0	0	0	0	0	0	0	0	0	0	0	0	0
MAG1119	d__Bacteria;p__Chloroflexota;c__Anaerolineae;o__Anaerolineales;f__EnvOPS12;g__UBA12294;s__Unclassified	Guizhou	0	0	0	0	0	0	0	0	0	0	0	0	0	0	0	0	0	0	0	0	0	0	0	0	0	0.179136	0	0	0	0	0	1.77375	0	0	0.844366	0	0.585373	0	0	0.795513	0.408684	0.309222	0.927927	0.44427	0	5.07417	0
MAG112	d__Bacteria;p__Deinococcota;c__Deinococci;o__Deinococcales;f__Deinococcaceae;g__Deinococcus;s__Unclassified	Sichuan、Jiangsu	0	0.753011	0	0	0	0	0	0.304979	0	0.200028	0.245672	0	0	0	2.17092	0	1.30104	0	0	0.300517	0	0.655355	0	0	0	0	0	0	0	0	0	0	0	0	0	0	0	0	0	0	0	0	0	0	0	0	0
MAG1120	d__Bacteria;p__Actinomycetota;c__Actinomycetia;o__Actinomycetales;f__Dermatophilaceae;g__Mobilicoccus;s__Unclassified	Sichuan、Yunnan	0.0634045	0	0.471539	0	0.0732954	0	0	0.435387	0.273714	0.0912436	0	0	0	0	0.202323	0	0	0.00596502	0.109607	0.309926	0.0168005	0.0855891	9.84744	0	0	0	0	0	0	0	0	0	0	0	0	0	0	0	0	0	0	0	0	0	0	0	0
MAG1121	d__Bacteria;p__Bacillota;c__Bacilli;o__Erysipelotrichales;f__Erysipelotrichaceae;g__Erysipelothrix;s__Erysipelothrix sp012520695	Sichuan、Yunnan	0	0	0.0114824	0	0	0	0	0	0	0	0	0	0.469662	0	0	0	0	0.161479	0	0	0.963255	0	0	0.0267941	0	0	0	0	0	0	0	0	0	0	0	0	0	0	0	0	0	0	0	0	0	0	0
MAG1122	d__Bacteria;p__Bacteroidota;c__Bacteroidia;o__Flavobacteriales;f__PHOS-HE28;g__PHOS-HE28;s__Unclassified	Sichuan	0	0	0	0	0.0669851	0	0	0	0	0	0.189872	0	0	0	0.177898	0.0593769	2.4275	0	0	0	0	0	0	0	0	0	0	0	0	0	0	0	0	0	0	0	0	0	0	0	0	0	0	0	0	0	0
MAG1123	d__Bacteria;p__Actinomycetota;c__Thermoleophilia;o__Gaiellales;f__Gaiellaceae;g__VAXT01;s__Unclassified	Guizhou	0	0	0	0	0	0	0	0	0	0	0	0	0	0	0	0	0	0	0	0	0	0	0	0	0	0	0	1.12314	0	5.50943	0	0	0.200297	0	0	0	0	0.256982	0	0	0	0	0.0785172	0.439801	0.543149	0	3.90776
MAG1124	d__Bacteria;p__Pseudomonadota;c__Gammaproteobacteria;o__Burkholderiales;f__Burkholderiaceae_C;g__Paenalcaligenes;s__Unclassified	Sichuan	0	0	0	0	0	0	0	0	0	0	0	0	0.854028	0	0	0	0	0.074142	0	0	0.187263	0	0	0.0765657	0	0	0	0	0	0	0	0	0	0	0	0	0	0	0	0	0	0	0	0	0	0	0
MAG1125	d__Bacteria;p__Actinomycetota;c__Thermoleophilia;o__Solirubrobacterales;f__70-9;g__Unclassified;s__Unclassified	Sichuan、Guizhou	0	0	0	0	0	0	0	0	0	1.11637	0	0	0	0	0	0	0	0	0	4.29672	0	0	0	0	0	0	0	0	0	0	0	0	0	0	0	0	0	0	0	0	0.204336	0	0	0	0	0	0
MAG1126	d__Bacteria;p__Chloroflexota;c__Limnocylindria;o__Limnocylindrales;f__CSP1-4;g__SPCO01;s__Unclassified	Guizhou、Jiangsu	0	0	0	0	0	0	0	0	0	0	0	0	0	0	0	0	0	0	0	0	0	0	0	0	0	0	0	0	0	0	0.119172	0	0	0	0	0	0	0.191426	0	0.0888125	0	0	0	0	0	0	0
MAG1127	d__Bacteria;p__Pseudomonadota;c__Gammaproteobacteria;o__Burkholderiales;f__Burkholderiaceae;g__Telluria;s__Unclassified	Sichuan、Jiangsu	0	0.133772	0	0	0.110159	0	0	0.314823	0.115487	0	0.379915	0	0	0	0.279034	0	1.68101	0	0.0359512	0.115441	0	0.182621	0	0	0	0	0	0	0	0	0	0	0	0	0	0	0	0	0	0	0	0	0	0	0	0	0
MAG1128	d__Bacteria;p__Actinomycetota;c__Actinomycetia;o__Mycobacteriales;f__CADCTP01;g__CADCTP01;s__Unclassified	Yunnan、Jiangsu	0	0	0	0	0	0	0	0	0	0	0	0	0	0	0	0	0	0	0	0	0	0	0	0	0	0	0	0	0	0	0	0	0	0	0	0	0	0	0	0	0	0	0	0	0	0	0
MAG1129	d__Bacteria;p__Pseudomonadota;c__Alphaproteobacteria;o__Rhodobacterales;f__Rhodobacteraceae;g__Paracoccus;s__Paracoccus sp021491915	Sichuan、Guizhou、Yunnan、Jiangsu	0.274485	0	0	0.128304	0.217765	0	0.127922	1.07991	0.515589	0.231184	1.77117	0	0	0	1.47519	0.0940528	0.908227	0	0.330558	0.0991768	0	0.0804473	0.209727	0	0.520714	0.249238	0.487845	0.252951	0	0.104671	0.383639	0.185489	0	0	0	0	0	0.53662	0	0.403314	0.668756	0.443944	0.252412	0	0	0	0.090275
MAG113	d__Bacteria;p__Chloroflexota;c__UBA5177;o__UBA5177;f__UBA5177;g__Unclassified;s__Unclassified	Yunnan	0	0	0	0	0	0	0	0	0	0	0	0	0	0	0	0	0	0	0	0	0	0	0	0	0	0	0	0	0	0	0	0	0	0	0	0	0	0	0	0	0	0	0	0	0	0	0
MAG1130	d__Bacteria;p__Bacteroidota;c__Bacteroidia;o__Flavobacteriales;f__Flavobacteriaceae;g__Flavobacterium;s__Unclassified	Sichuan	0	0	0.0152626	0	0	0	0	0	0	0	0	0	0.867156	0	0.0937348	0	0	0.0526937	0	0	0.12331	0	0.0120409	0.0776533	0.108609	0	0	0	0	0	0	0	0	0	0	0	0	0	0	0	0	0	0	0	0	0	0
MAG1131	d__Bacteria;p__Actinomycetota;c__Acidimicrobiia;o__Acidimicrobiales;f__AC-14;g__CADCTB01;s__Unclassified	Yunnan	0	0	0	0	0	0	0	0	0	0	0	0	0	0	0	0	0	0	0	0	0	0	0	0	0	0	0	0	0	0	0	0	0	0	0	0	0	0	0	0	0	0	0	0	0	0	0
MAG1132	d__Bacteria;p__Actinomycetota;c__Thermoleophilia;o__Solirubrobacterales;f__70-9;g__RHKX01;s__Unclassified	Sichuan、Guizhou、Jiangsu	0	0	0	0	0	0	0	0	0	0.152844	0	0	0	0	0	0	0	0	0	0.177161	0	0	0	0	0	0	0	0	0	0	0	0	0.112754	0	0	0	0	0	0	0	0	0.086889	0	0	0	0	0
MAG1133	d__Bacteria;p__Actinomycetota;c__Actinomycetia;o__Actinomycetales;f__Microbacteriaceae;g__Microbacterium;s__Unclassified	Sichuan、Jiangsu	0.0355814	0	0	0	0	0	0	0	0	0	0	0	0	0	0	0	0	0	0.0377823	0	0	0	0.0330417	0	0	0	0	0	0	0	0	0	0	0	0	0	0	0	0	0	0	0	0	0	0	0	0
MAG1134	d__Bacteria;p__Pseudomonadota;c__Gammaproteobacteria;o__Enterobacterales_A;f__Aeromonadaceae;g__Oceanisphaera;s__Oceanisphaera merdipullorum	Sichuan、Yunnan	0	0	0	0	0	0	0	0	0	0	0	0	3.21876	0	0.12441	0	0	1.30688	0	0	0.0982493	0	0	0.252418	0	0	0	0	0	0	0	0	0	0	0	0	0	0	0	0	0	0	0	0	0	0	0
MAG1135	d__Bacteria;p__Acidobacteriota;c__Thermoanaerobaculia;o__UBA5704;f__UBA5704;g__UBA5704;s__Unclassified	Jiangsu	0	0	0	0	0	0	0	0	0	0	0	0	0	0	0	0	0	0	0	0	0	0	0	0	0	0	0	0	0	0	0	0	0	0	0	0	0	0	0	0	0	0	0	0	0	0	0
MAG1136	d__Bacteria;p__Actinomycetota;c__Actinomycetia;o__Actinomycetales;f__Dermabacteraceae;g__Brachybacterium;s__Brachybacterium rhamnosum	Jiangsu	0	0	0	0	0	0	0	0	0	0	0	0	0	0	0	0	0	0	0	0	0	0	0	0	0	0	0	0	0	0	0	0	0	0	0	0	0	0	0	0	0	0	0	0	0	0	0
MAG114	d__Bacteria;p__Dormibacterota;c__Dormibacteria;o__Dormibacterales;f__Dormibacteraceae;g__Unclassified;s__Unclassified	Yunnan	0	0	0	0	0	0	0	0	0	0	0	0	0	0	0	0	0	0	0	0	0	0	0	0	0	0	0	0	0	0	0	0	0	0	0	0	0	0	0	0	0	0	0	0	0	0	0
MAG115	d__Bacteria;p__Bacteroidota;c__Kapabacteria;o__OLB7;f__OLB7;g__JAFDZV01;s__Unclassified	Guizhou	0	0	0	0	0	0	0	0	0	0	0	0	0	0	0	0	0	0	0	0	0	0	0	0	0	0.392011	0.139306	0	0	0	0	0	0	0	0	0	0	0	0	0	5.72436	0	0	0	0	0	0
MAG116	d__Bacteria;p__Actinomycetota;c__Actinomycetia;o__Mycobacteriales;f__Mycobacteriaceae;g__Aldersonia;s__Unclassified	Jiangsu	0	0	0	0	0	0	0	0	0	0	0	0	0	0	0	0	0	0	0	0	0	0	0	0	0	0	0	0	0	0	0	0	0	0	0	0	0	0	0	0	0	0	0	0	0	0	0
MAG117	d__Bacteria;p__Pseudomonadota;c__Alphaproteobacteria;o__Sphingomonadales;f__Sphingomonadaceae;g__Sphingomonas;s__Unclassified	Sichuan	0	0	0	0	0	0	0	1.02809	0.278911	0.69026	0	0	0	0	0.303637	0	0.272724	0	0	0.822837	0	2.12182	0	0	0	0	0	0	0	0	0	0	0	0	0	0	0	0	0	0	0	0	0	0	0	0	0
MAG118	d__Bacteria;p__Pseudomonadota;c__Gammaproteobacteria;o__Xanthomonadales;f__Xanthomonadaceae;g__Luteimonas_D;s__Unclassified	Sichuan、Guizhou	0.022492	0	0.123002	0	0	0.0403216	0.14552	0	0	0.0781529	0	0	0.110778	1.21221	0.693699	0	0	0.0746406	0	0	0.0658373	0	0.0330581	0.325966	0.345229	0	0.137207	0	0	0	0	0	0	0	0	0	0	0	0	0	0	0	0	0	0	0	0
MAG119	d__Bacteria;p__Pseudomonadota;c__Gammaproteobacteria;o__Burkholderiales;f__Usitatibacteraceae;g__Usitatibacter;s__Unclassified	Yunnan	0	0	0	0	0	0	0	0	0	0	0	0	0	0	0	0	0	0	0	0	0	0	0	0	0	0	0	0	0	0	0	0	0	0	0	0	0	0	0	0	0	0	0	0	0	0	0
MAG12	d__Bacteria;p__Acidobacteriota;c__Blastocatellia;o__Pyrinomonadales;f__Pyrinomonadaceae;g__QHXN01;s__Unclassified	Yunnan、Jiangsu	0	0	0	0	0	0	0	0	0	0	0	0	0	0	0	0	0	0	0	0	0	0	0	0	0	0	0	0	0	0	0	0	0	0	0	0	0	0	0	0	0	0	0	0	0	0	0
MAG120	d__Bacteria;p__Pseudomonadota;c__Alphaproteobacteria;o__Rhizobiales;f__Hyphomicrobiaceae;g__AWTP1-13;s__Unclassified	Sichuan、Guizhou、Yunnan、Jiangsu	0	0.292248	0	0	0.217612	0	0.206969	0	0.192881	0.414595	0	0.309296	0	0	0	0.26717	0	0	0	0.406857	0	0.0426869	0	0	0	1.13612	0.381559	0.535693	0.423072	0.75433	1.09224	0.541765	1.10851	0	1.37656	0.440043	0.9383	0.313439	0.392162	0.24203	0.724106	1.03681	0.824089	1.27415	1.28882	0.948354	0.824441
MAG121	d__Bacteria;p__Actinomycetota;c__Actinomycetia;o__Propionibacteriales;f__Propionibacteriaceae;g__Arachnia;s__Arachnia defluvii	Sichuan	0.632753	0	0.10418	0.493067	0	0.0952258	0	0	0	0	0	0	0	0	0	0	0	0	1.41304	0	0	0	0.283586	0	0	0	0	0	0	0	0	0	0	0	0	0	0	0	0	0	0	0	0	0	0	0	0
MAG122	d__Bacteria;p__Pseudomonadota;c__Gammaproteobacteria;o__Xanthomonadales;f__Xanthomonadaceae;g__Lysobacter_B;s__Lysobacter_B sp011300685	Sichuan、Guizhou、Yunnan	0.126679	0.185211	0	0.2029	0.309013	0.145245	0.775208	0.352029	1.34842	0.798247	0	0	0	0	0	0.391939	0	0	0.79137	0.242252	0	5.74301	0.301193	0	0.379951	0	0	0	0	0	0	0	0	0	0	0	0	0	0	0	0	0.326249	0	0	0	0	0
MAG123	d__Bacteria;p__Patescibacteria;c__Saccharimonadia;o__Saccharimonadales;f__UBA5946;g__UBA5946;s__Unclassified	Yunnan	0	0	0	0	0	0	0	0	0	0	0	0	0	0	0	0	0	0	0	0	0	0	0	0	0	0	0	0	0	0	0	0	0	0	0	0	0	0	0	0	0	0	0	0	0	0	0
MAG124	d__Bacteria;p__Pseudomonadota;c__Gammaproteobacteria;o__Steroidobacterales;f__Steroidobacteraceae;g__SCUD01;s__Unclassified	Sichuan、Guizhou、Jiangsu	0	0	0	0	0	0	0	0	0	0	0	3.04842	0	0	0	0	0	0	0	0	0	0	0	0	0	0.608295	0.797143	0	0	0	0.256309	0	0.1426	0	0.347478	0	0.107882	0.192314	0	0	0	0	0	0	0.114115	0	0
MAG125	d__Bacteria;p__Actinomycetota;c__Actinomycetia;o__Mycobacteriales;f__Nakamurellaceae;g__Nakamurella;s__Unclassified	Sichuan	0	0	0	0	0.133228	0	0	0.100447	0.251686	0	9.74492	0.072717	0	0	0.0965449	0	0.0588992	0	0	0	0	0	0	0	0.125414	0	0	0	0	0	0	0	0	0	0	0	0	0	0	0	0	0	0	0	0	0	0
MAG126	d__Bacteria;p__Nitrospirota;c__Nitrospiria;o__Nitrospirales;f__Nitrospiraceae;g__Nitrospira_F;s__Unclassified	Sichuan、Guizhou、Jiangsu	0	1.73337	0	0.321922	0.80211	0.0400519	0.61523	0	0.587733	1.16637	0	0.0467575	0	0	0.167169	0.792422	0	0	0	1.16421	0	0.204366	0	0	0.773703	0.277402	0.271964	0	0	0	0.395794	0	0	0	0.177532	0	0.169136	0	0	0	0.452381	0.10325	0.0675557	0	0	0	0
MAG127	d__Bacteria;p__Actinomycetota;c__Actinomycetia;o__Mycobacteriales;f__Mycobacteriaceae;g__Corynebacterium;s__Corynebacterium stationis	Sichuan、Yunnan、Jiangsu	0.0204815	0	0.850879	0	0	0	0	0.079452	0	0	0	0	0.0102628	0.578423	0.131404	0	0	0.104862	0	0	0.149122	0	0.198845	0.0211629	0.0900013	0	0	0	0	0	0	0	0	0	0	0	0	0	0	0	0	0	0	0	0	0	0
MAG128	d__Bacteria;p__Acidobacteriota;c__Thermoanaerobaculia;o__Gp7-AA8;f__Gp7-AA8;g__QHVT01;s__Unclassified	Yunnan	0	0	0	0	0	0	0	0	0	0	0	0	0	0	0	0	0	0	0	0	0	0	0	0	0	0	0	0	0	0	0	0	0	0	0	0	0	0	0	0	0	0	0	0	0	0	0
MAG129	d__Bacteria;p__Pseudomonadota;c__Gammaproteobacteria;o__Pseudomonadales;f__Spongiibacteraceae;g__Unclassified;s__Unclassified	Jiangsu	0	0	0	0	0	0	0	0	0	0	0	0	0	0	0	0	0	0	0	0	0	0	0	0	0	0	0	0	0	0	0	0	0	0	0	0	0	0	0	0	0	0	0	0	0	0	0
MAG13	d__Bacteria;p__Pseudomonadota;c__Gammaproteobacteria;o__Burkholderiales;f__Burkholderiaceae_B;g__Rhodoferax_A;s__Rhodoferax_A sp004323695	Jiangsu	0	0	0	0	0	0	0	0	0	0	0	0	0	0	0	0	0	0	0	0	0	0	0	0	0	0	0	0	0	0	0	0	0	0	0	0	0	0	0	0	0	0	0	0	0	0	0
MAG130	d__Bacteria;p__Pseudomonadota;c__Gammaproteobacteria;o__Burkholderiales;f__SG8-41;g__Unclassified;s__Unclassified	Yunnan	0	0	0	0	0	0	0	0	0	0	0	0	0	0	0	0	0	0	0	0	0	0	0	0	0	0	0	0	0	0	0	0	0	0	0	0	0	0	0	0	0	0	0	0	0	0	0
MAG131	d__Bacteria;p__Bacillota;c__Bacilli;o__Bacillales;f__Planococcaceae;g__Planococcus;s__Planococcus sp009707665	Sichuan	0	0	0.00621503	0	0	0	0	0	0	0	0	0	0.0066178	0.0279674	0.277524	0	0	0.0977295	0	0	0.00961988	0	0	0.418627	0.0686876	0	0	0	0	0	0	0	0	0	0	0	0	0	0	0	0	0	0	0	0	0	0
MAG132	d__Bacteria;p__Pseudomonadota;c__Alphaproteobacteria;o__Sphingomonadales;f__Sphingomonadaceae;g__Sphingomicrobium;s__Unclassified	Jiangsu	0	0	0	0	0	0	0	0	0	0	0	0	0	0	0	0	0	0	0	0	0	0	0	0	0	0	0	0	0	0	0	0	0	0	0	0	0	0	0	0	0	0	0	0	0	0	0
MAG133	d__Bacteria;p__Pseudomonadota;c__Gammaproteobacteria;o__Burkholderiales;f__Burkholderiaceae_B;g__Ramlibacter;s__Unclassified	Yunnan	0	0	0	0	0	0	0	0	0	0	0	0	0	0	0	0	0	0	0	0	0	0	0	0	0	0	0	0	0	0	0	0	0	0	0	0	0	0	0	0	0	0	0	0	0	0	0
MAG134	d__Bacteria;p__Bacteroidota;c__Bacteroidia;o__Sphingobacteriales;f__Sphingobacteriaceae;g__Pedobacter;s__Unclassified	Sichuan	0	0	0	0	0	0	0	0	0	0	0	0	0	0	0	0	0	0	0	0	0	0	0.604176	0	0	0	0	0	0	0	0	0	0	0	0	0	0	0	0	0	0	0	0	0	0	0	0
MAG135	d__Bacteria;p__Actinomycetota;c__Acidimicrobiia;o__UBA5794;f__ZC4RG35;g__Unclassified;s__Unclassified	Guizhou、Jiangsu	0	0	0	0	0	0	0	0	0	0	0	0	0	0	0	0	0	0	0	0	0	0	0	0	0	0.28738	0.090914	0	0	0.125696	0	0.484828	0	0	0.741668	0	0.0810414	0.166173	0	0.353219	0.372094	0	0.510331	0	0	0.123473	1.01594
MAG136	d__Bacteria;p__Actinomycetota;c__Actinomycetia;o__Actinomycetales;f__Beutenbergiaceae;g__Salana;s__Unclassified	Sichuan	0	0	0.344926	0	0	0	0	0	0	0	0	0	0	0	0	0	0	0	0	0	0	0	0.0270064	0	0	0	0	0	0	0	0	0	0	0	0	0	0	0	0	0	0	0	0	0	0	0	0
MAG137	d__Bacteria;p__Desulfobacterota_B;c__Binatia;o__UBA9968;f__UBA9968;g__WHTF01;s__Unclassified	Guizhou、Jiangsu	0	0	0	0	0	0	0	0	0	0	0	0	0	0	0	0	0	0	0	0	0	0	0	0	0	0.675118	0.263383	0.823824	0	0.921199	0.938052	0.160544	1.11876	0	1.10237	0	0.460988	0.786776	0	0.423717	0.615332	0.302315	0.455681	1.72189	1.47165	0.163432	0.977589
MAG138	d__Bacteria;p__Bacteroidota;c__Bacteroidia;o__Chitinophagales;f__Chitinophagaceae;g__UBA1952;s__Unclassified	Sichuan	0	0	0	0	0	0	0	0.0770633	0	0	0	0	0	0	0.123358	0	3.51764	0	0	0	0	0	0	0	0	0	0	0	0	0	0	0	0	0	0	0	0	0	0	0	0	0	0	0	0	0	0
MAG139	d__Bacteria;p__Pseudomonadota;c__Gammaproteobacteria;o__Burkholderiales;f__Burkholderiaceae_C;g__Alcaligenes;s__Alcaligenes faecalis	Sichuan	0	0	0.250803	0	0	0	0	0	0	0	0	0	0	0.037322	0	0	0	0.00448382	0	0	0	0	0.0376211	0.0233189	0.274519	0	0	0	0	0	0	0	0	0	0	0	0	0	0	0	0	0	0	0	0	0	0
MAG14	d__Bacteria;p__Myxococcota;c__Polyangia;o__Nannocystales;f__Nannocystaceae;g__Nannocystis;s__Unclassified	Sichuan、Jiangsu	0	0.134368	0	0	0	0	0	0	0	0	0	0	0	0	0	0	0	0	0	0	0	0	0	0	0	0	0	0	0	0	0	0	0	0	0	0	0	0	0	0	0	0	0	0	0	0	0
MAG140	d__Bacteria;p__Actinomycetota;c__Actinomycetia;o__Actinomycetales;f__Microbacteriaceae;g__Microbacterium;s__Unclassified	Sichuan	0.0165949	0	0.244182	0	0.158777	0	0	0.249751	0	0	0	0	0.010377	0.899547	0.0612578	0.0868473	0	0.0142378	0	0.109628	0.0351034	0	0.0475669	0.0225718	0.651049	0	0	0	0	0	0	0	0	0	0	0	0	0	0	0	0	0	0	0	0	0	0
MAG141	d__Bacteria;p__Acidobacteriota;c__Vicinamibacteria;o__Vicinamibacterales;f__UBA2999;g__JACCSI01;s__Unclassified	Guizhou、Jiangsu	0	0	0	0	0	0	0	0	0	0	0	0	0	0	0	0	0	0	0	0	0	0	0	0	0	0	0	0	0	0	0	0	0	0	0	0	0	0	0	0	0	0	0	0	0	0	0.150911
MAG142	d__Bacteria;p__Pseudomonadota;c__Alphaproteobacteria;o__Sphingomonadales;f__Sphingomonadaceae;g__Erythrobacter;s__Unclassified	Jiangsu	0	0	0	0	0	0	0	0	0	0	0	0	0	0	0	0	0	0	0	0	0	0	0	0	0	0	0	0	0	0	0	0	0	0	0	0	0	0	0	0	0	0	0	0	0	0	0
MAG143	d__Bacteria;p__Actinomycetota;c__Actinomycetia;o__Mycobacteriales;f__Frankiaceae;g__Unclassified;s__Unclassified	Yunnan	0	0	0	0	0	0	0	0	0	0	0	0	0	0	0	0	0	0	0	0	0	0	0	0	0	0	0	0	0	0	0	0	0	0	0	0	0	0	0	0	0	0	0	0	0	0	0
MAG144	d__Bacteria;p__Acidobacteriota;c__Blastocatellia;o__Pyrinomonadales;f__Pyrinomonadaceae;g__PSRF01;s__Unclassified	Guizhou、Jiangsu	0	0	0	0	0	0	0	0	0	0	0	0	0	0	0	0	0	0	0	0	0	0	0	0	0	0.58297	0.126168	0	0	0	0.221963	0.315809	0	0	0.664129	0	0	0	0	0.163781	0.378342	3.67376	0.338848	0.12321	0.115929	0.793295	0.151216
MAG145	d__Bacteria;p__Actinomycetota;c__Thermoleophilia;o__Solirubrobacterales;f__70-9;g__RHKX01;s__Unclassified	Sichuan、Guizhou、Jiangsu	0	0	0	0	0	0	0	0	0	0.151166	0	0	0	0	0	0	0	0	0	0.180678	0	0	0	0	0	0	0	0	0	0	0	0	0.0877509	0	0	0	0	0	0	0	0	0.0862973	0	0	0	0	0
MAG146	d__Bacteria;p__Pseudomonadota;c__Gammaproteobacteria;o__Pseudomonadales;f__Pseudomonadaceae;g__Thiopseudomonas;s__Unclassified	Sichuan	0	0	0	0	0	0	0	0	0	0	0	0	0.531916	0	0	0	0	0.875164	0	0	0.344281	0	0	0.0739005	0	0	0	0	0	0	0	0	0	0	0	0	0	0	0	0	0	0	0	0	0	0	0
MAG147	d__Bacteria;p__Nitrospirota;c__Nitrospiria;o__Nitrospirales;f__Nitrospiraceae;g__Nitrospira_F;s__Unclassified	Sichuan、Guizhou、Yunnan、Jiangsu	0	0	0	0	0	0	0	0	0.23072	0.587816	0	0.188952	0	0	0	0	0	0	0	0.182699	0	0	0	0	0	2.76202	1.31598	2.98364	1.39594	1.23975	3.66276	1.70113	1.50651	0.218997	5.32144	2.05375	1.0954	1.24921	1.76829	1.60181	0.38117	3.42012	3.94277	0.532501	1.43635	4.79787	0
MAG148	d__Bacteria;p__Pseudomonadota;c__Alphaproteobacteria;o__Acetobacterales;f__Acetobacteraceae;g__Unclassified;s__Unclassified	Jiangsu	0	0	0	0	0	0	0	0	0	0	0	0	0	0	0	0	0	0	0	0	0	0	0	0	0	0	0	0	0	0	0	0	0	0	0	0	0	0	0	0	0	0	0	0	0	0	0
MAG149	d__Bacteria;p__Actinomycetota;c__Actinomycetia;o__Propionibacteriales;f__Nocardioidaceae;g__Nocardioides;s__Unclassified	Guizhou、Yunnan	0	0	0	0	0	0	0	0	0	0	0	0	0	0	0	0	0	0	0	0	0	0	0	0	0	0	0	0	0.325093	0.169503	0	0.0753897	0	0	0	0.302598	0	0	0.290134	0.159337	0	0	0.12067	0	0	0	0
MAG15	d__Bacteria;p__Cyanobacteriota;c__Cyanobacteriia;o__Cyanobacteriales;f__Coleofasciculaceae;g__Allocoleopsis;s__Unclassified	Guizhou、Jiangsu	0	0	0	0	0	0	0	0	0	0	0	0	0	0	0	0	0	0	0	0	0	0	0	0	0	0	0	0.235358	0	0	0	0.543899	0	0	0	0	0	0.760463	0	0	0	0	0.758903	0	0	0.409024	0.462818
MAG150	d__Bacteria;p__Pseudomonadota;c__Alphaproteobacteria;o__Rhodobacterales;f__Rhodobacteraceae;g__Paracoccus;s__Unclassified	Sichuan	0.338685	0	0.045196	0.12128	0	0.0433555	0	0	0	0	0	0	0	0	0	0	0	0	0.27041	0	0	0	0.0502252	0	0	0	0	0	0	0	0	0	0	0	0	0	0	0	0	0	0	0	0	0	0	0	0
MAG151	d__Bacteria;p__Actinomycetota;c__Thermoleophilia;o__Solirubrobacterales;f__Solirubrobacteraceae;g__Palsa-465;s__Unclassified	Yunnan	0	0	0	0	0	0	0	0	0	0	0	0	0	0	0	0	0	0	0	0	0	0	0	0	0	0	0	0	0	0	0	0	0	0	0	0	0	0	0	0	0	0	0	0	0	0	0
MAG152	d__Bacteria;p__Bacteroidota;c__Bacteroidia;o__Flavobacteriales;f__Flavobacteriaceae;g__JAJYTI01;s__Unclassified	Sichuan、Yunnan	0	0	0	0	0	0	0	0	0	0	0	0	1.56869	0	0	0	0	0.108725	0	0	0.0849899	0	0	0	0	0	0	0	0	0	0	0	0	0	0	0	0	0	0	0	0	0	0	0	0	0	0
MAG153	d__Bacteria;p__Actinomycetota;c__Actinomycetia;o__Actinomycetales;f__Dermatophilaceae;g__Ornithinicoccus;s__Ornithinicoccus ciconiae	Sichuan、Guizhou、Jiangsu	1.22639	0.0551274	0.104807	0.847544	0.253286	0.0752802	0	0.128817	0.158598	0	0	0	0	0	0.0497506	0.152375	0	0	0.46431	0	0	0	0.390258	0	0.0776298	0	0.559847	0	0	0	0	0	0	0	0	0	0	0	0	0	0	0	0	0	0	0	0
MAG154	d__Bacteria;p__Pseudomonadota;c__Alphaproteobacteria;o__Rhizobiales;f__Xanthobacteraceae;g__Bradyrhizobium;s__Unclassified	Guizhou、Yunnan	0	0	0	0	0	0	0	0	0	0	0	0	0	0	0	0	0	0	0	0	0	0	0	0	0	0	0	0	0	0	0	0	0	0.283383	0	0	0	0	0	0	0	0	0	0	0	0	0
MAG155	d__Bacteria;p__Actinomycetota;c__Actinomycetia;o__Mycobacteriales;f__Mycobacteriaceae;g__Corynebacterium;s__Corynebacterium sp945649885	Sichuan、Yunnan	0	0	0.126322	0	0.0649706	0	0	0	0	0.095732	0	0	0.356016	0.127842	1.02163	0.110051	0	1.34428	0	0	1.10267	0	0.0931045	5.52249	0.717558	0	0	0	0	0	0	0	0	0	0	0	0	0	0	0	0	0	0	0	0	0	0
MAG156	d__Bacteria;p__Actinomycetota;c__Actinomycetia;o__Streptomycetales;f__Streptomycetaceae;g__Streptomyces;s__Unclassified	Sichuan	0	0	0.257704	0	0	0	0	0	0	0	0	0	0	0	0	0	0	0	0	0	0	0	0	0	0	0	0	0	0	0	0	0	0	0	0	0	0	0	0	0	0	0	0	0	0	0	0
MAG157	d__Bacteria;p__Pseudomonadota;c__Alphaproteobacteria;o__Sphingomonadales;f__Sphingomonadaceae;g__Sphingomicrobium;s__Unclassified	Jiangsu	0	0	0	0	0	0	0	0	0	0	0	0	0	0	0	0	0	0	0	0	0	0	0	0	0	0	0	0	0	0	0	0	0	0	0	0	0	0	0	0	0	0	0	0	0	0	0
MAG158	d__Bacteria;p__Patescibacteria;c__Saccharimonadia;o__Saccharimonadales;f__UBA1547;g__JALRBM01;s__Unclassified	Yunnan	0	0	0	0	0	0	0	0	0	0	0	0	0	0	0	0	0	0	0	0	0	0	0	0	0	0	0	0	0	0	0	0	0	0	0	0	0	0	0	0	0	0	0	0	0	0	0
MAG159	d__Bacteria;p__Actinomycetota;c__Actinomycetia;o__Actinomycetales;f__Microbacteriaceae;g__Microbacterium;s__Microbacterium sp943181415	Guizhou、Yunnan、Jiangsu	0	0	0	0	0	0	0	0	0	0	0	0	0	0	0	0	0	0	0	0	0	0	0	0	0	0	0.0972512	0	0	0	0	0	0	0	0	0	0	0	0	0	0	0	0	0	0	0	0
MAG16	d__Bacteria;p__Actinomycetota;c__Actinomycetia;o__Actinomycetales;f__Cellulomonadaceae;g__Timonella;s__Unclassified	Sichuan、Yunnan	0	0	0	0	0	0	0	0	0	0	0	0	2.04423	0	0.105788	0	0	0.196641	0	0	0.634518	0	0	0.571884	0	0	0	0	0	0	0	0	0	0	0	0	0	0	0	0	0	0	0	0	0	0	0
MAG160	d__Bacteria;p__Actinomycetota;c__Actinomycetia;o__Propionibacteriales;f__Nocardioidaceae;g__Marmoricola;s__Unclassified	Sichuan、Guizhou、Jiangsu	0	0	0	0	0.424829	0	0	0	0	0.199969	0	0	0	0	0	0.268114	0	0	0	0.40438	0	0	0	0	0	3.02928	1.36302	0.74998	0	1.53108	1.05413	0.376765	5.53416	0	2.29806	0	0.933694	0	0	1.80521	2.21947	2.54792	1.78335	0.628411	0.410808	0.539354	0.124739
MAG161	d__Bacteria;p__Actinomycetota;c__Actinomycetia;o__Actinomycetales;f__Micrococcaceae;g__Glutamicibacter;s__Glutamicibacter arilaitensis	Sichuan、Jiangsu	2.85999	0	0.101673	0.858179	0.134069	0.201229	0.224205	0	0	0.0921302	0	0	0	0	0.143458	0	0	0.202493	0.648274	0	0.0116965	0	0.109768	0.598696	0.156452	0	0	0	0	0	0	0	0	0	0	0	0	0	0	0	0	0	0	0	0	0	0
MAG162	d__Bacteria;p__Pseudomonadota;c__Gammaproteobacteria;o__Xanthomonadales;f__Rhodanobacteraceae;g__Oleiagrimonas;s__Unclassified	Sichuan	0	0	0	0	0	2.95688	0	0	0	0	0	0	0	0	0	0	0	0	0	0	0	0	0	0	0	0	0	0	0	0	0	0	0	0	0	0	0	0	0	0	0	0	0	0	0	0	0
MAG163	d__Bacteria;p__Chloroflexota;c__Chloroflexia;o__Thermomicrobiales;f__CADCWN01;g__CADCWN01;s__Unclassified	Yunnan	0	0	0	0	0	0	0	0	0	0	0	0	0	0	0	0	0	0	0	0	0	0	0	0	0	0	0	0	0	0	0	0	0	0	0	0	0	0	0	0	0	0	0	0	0	0	0
MAG164	d__Bacteria;p__Actinomycetota;c__Acidimicrobiia;o__IMCC26256;f__JACDBD01;g__JACDBD01;s__Unclassified	Yunnan	0	0	0	0	0	0	0	0	0	0	0	0	0	0	0	0	0	0	0	0	0	0	0	0	0	0	0	0	0	0	0	0	0	0	0	0	0	0	0	0	0	0	0	0	0	0	0
MAG165	d__Bacteria;p__Actinomycetota;c__Actinomycetia;o__Propionibacteriales;f__Nocardioidaceae;g__Nocardioides;s__Unclassified	Sichuan、Guizhou、Yunnan、Jiangsu	0.0234902	0.854267	0	0.292664	2.42063	0.0879283	2.50648	0.339631	1.23813	1.38159	1.75521	0.153819	0	0	0.561797	1.36077	0.198181	0	0.113894	1.03292	0	0.277408	0	0	0.790328	5.15924	3.79213	0.508351	2.75228	0.441098	1.74626	0.469687	0.742733	0.879794	3.05459	6.00257	0.476886	0.386108	8.4034	3.73916	3.1323	0.966466	1.12961	0.420328	0.280901	1.29897	0.169612
MAG166	d__Bacteria;p__Bacteroidota;c__Bacteroidia;o__Chitinophagales;f__Chitinophagaceae;g__Unclassified;s__Unclassified	Yunnan	0	0	0	0	0	0	0	0	0	0	0	0	0	0	0	0	0	0	0	0	0	0	0	0	0	0	0	0	0	0	0	0	0	0	0	0	0	0	0	0	0	0	0	0	0	0	0
MAG167	d__Bacteria;p__Acidobacteriota;c__Blastocatellia;o__Pyrinomonadales;f__Pyrinomonadaceae;g__JAIBCC01;s__Unclassified	Yunnan	0	0	0	0	0	0	0	0	0	0	0	0	0	0	0	0	0	0	0	0	0	0	0	0	0	0	0	0	0	0	0	0	0	0	0	0	0	0	0	0	0	0	0	0	0	0	0
MAG168	d__Bacteria;p__Actinomycetota;c__Acidimicrobiia;o__Acidimicrobiales;f__AC-14;g__CADCTB01;s__Unclassified	Yunnan	0	0	0	0	0	0	0	0	0	0	0	0	0	0	0	0	0	0	0	0	0	0	0	0	0	0	0	0	0	0	0	0	0	0	0	0	0	0	0	0	0	0	0	0	0	0	0
MAG169	d__Bacteria;p__Patescibacteria;c__Saccharimonadia;o__Saccharimonadales;f__UBA4665;g__JAGQNO01;s__Unclassified	Yunnan	0	0	0	0	0	0	0	0	0	0	0	0	0	0	0	0	0	0	0	0	0	0	0	0	0	0	0	0	0	0	0	0	0	0	0	0	0	0	0	0	0	0	0	0	0	0	0
MAG17	d__Bacteria;p__Bacteroidota;c__Bacteroidia;o__Chitinophagales;f__Chitinophagaceae;g__JAEWAC01;s__Unclassified	Yunnan	0	0	0	0	0	0	0	0	0	0	0	0	0	0	0	0	0	0	0	0	0	0	0	0	0	0	0	0	0	0	0	0	0	0	0	0	0	0	0	0	0	0	0	0	0	0	0
MAG170	d__Bacteria;p__Actinomycetota;c__Thermoleophilia;o__Gaiellales;f__Gaiellaceae;g__PALSA-600;s__Unclassified	Yunnan	0	0	0	0	0	0	0	0	0	0	0	0	0	0	0	0	0	0	0	0	0	0	0	0	0	0	0	0	0	0	0	0	0	0	0	0	0	0	0	0	0	0	0	0	0	0	0
MAG171	d__Bacteria;p__Actinomycetota;c__Actinomycetia;o__Mycobacteriales;f__Mycobacteriaceae;g__Dietzia;s__Unclassified	Sichuan	2.9448	0	0.0331374	0.872003	0	0.0768175	0	0.0524546	0	0	0	0	0	0.0559542	0	0	0	0	0.647264	0	0	0	0.134821	0.019492	0	0	0	0	0	0	0	0	0	0	0	0	0	0	0	0	0	0	0	0	0	0	0
MAG172	d__Bacteria;p__Acidobacteriota;c__Vicinamibacteria;o__Unclassified;f__Unclassified;g__Unclassified;s__Unclassified	Guizhou、Yunnan	0	0	0	0	0	0	0	0	0	0	0	0	0	0	0	0	0	0	0	0	0	0	0	0	0	0	0	0	0	0	0	0	0	0.340514	0	0.297986	0	0	0	0	0	0	0	0	0	0	0
MAG173	d__Bacteria;p__Chloroflexota;c__Anaerolineae;o__Anaerolineales;f__EnvOPS12;g__UBA12294;s__Unclassified	Guizhou、Jiangsu	0	0	0	0	0	0	0	0	0	0	0	0	0	0	0	0	0	0	0	0	0	0	0	0	0	0	0	0	0	0	0	0	0	0	0	0	0	1.78349	0	0	0	0	0	0	0	0	0.13679
MAG174	d__Bacteria;p__Actinomycetota;c__Actinomycetia;o__Actinomycetales;f__Micrococcaceae;g__Arthrobacter;s__Arthrobacter oxydans	Sichuan、Guizhou、Yunnan、Jiangsu	0	0	0	0	0.0642623	0	0	0	0	0	0	0	0	0	0	0	0	0	0	0	0	0	0	0	0	1.14836	2.27071	0.259497	0	0.104377	0.23892	0.475576	0	0	0.574023	0	0	0.394134	0	0.411063	0.560683	0	0.263977	0	0	0	0.141249
MAG175	d__Bacteria;p__Cyanobacteriota;c__Cyanobacteriia;o__Cyanobacteriales;f__Coleofasciculaceae;g__Unclassified;s__Unclassified	Jiangsu	0	0	0	0	0	0	0	0	0	0	0	0	0	0	0	0	0	0	0	0	0	0	0	0	0	0	0	0	0	0	0	0	0	0	0	0	0	0	0	0	0	0	0	0	0	0	0
MAG176	d__Bacteria;p__Actinomycetota;c__Actinomycetia;o__Actinomycetales;f__Dermatophilaceae;g__Flexivirga;s__Unclassified	Sichuan、Jiangsu	0	0	0	0.0909322	0	0	0	0	0	0	0	0	0	0	0	0	0	0	0	0	0	0	0	0	0	0	0	0	0	0	0	0	0	0	0	0	0	0	0	0	0	0	0	0	0	0	0
MAG177	d__Archaea;p__Thermoproteota;c__Nitrososphaeria;o__Nitrososphaerales;f__Nitrososphaeraceae;g__Nitrosocosmicus;s__Nitrosocosmicus oleophilus	Sichuan、Guizhou、Yunnan、Jiangsu	0	0.0562085	0	0.0558674	0.401357	0.0370599	0.171563	0	0.67232	0.504527	0	0.260335	0	0	0.0867628	0.536458	0	0	0	0.498185	0	0.289935	0	0	0.0987619	0.341266	0.192492	0.504576	0.811546	0.7077	0.772034	0.195289	0.164313	0.493543	0.690927	0.747105	0.421987	0.258241	0.801278	1.02048	0.810217	0.828244	0.285051	0.481298	0.561782	0.491586	0.156971
MAG178	d__Bacteria;p__Bacteroidota;c__Bacteroidia;o__Chitinophagales;f__Chitinophagaceae;g__Flavisolibacter;s__Unclassified	Jiangsu	0	0	0	0	0	0	0	0	0	0	0	0	0	0	0	0	0	0	0	0	0	0	0	0	0	0	0	0	0	0	0	0	0	0	0	0	0	0	0	0	0	0	0	0	0	0	0
MAG179	d__Bacteria;p__Actinomycetota;c__Actinomycetia;o__Actinomycetales;f__Dermabacteraceae;g__Brachybacterium;s__Unclassified	Sichuan、Yunnan	0.0703901	0	0.176017	0	0	0	0	0	0	0	0	0	0.0315397	0.111896	0.242114	0	0	0.226726	0	0	0.483057	0	0.0332876	6.49367	0.366872	0	0	0	0	0	0	0	0	0	0	0	0	0	0	0	0	0	0	0	0	0	0
MAG18	d__Bacteria;p__Pseudomonadota;c__Gammaproteobacteria;o__Pseudomonadales;f__Moraxellaceae;g__Acinetobacter;s__Acinetobacter pseudolwoffii	Sichuan、Guizhou、Yunnan	0.865835	0	0.110856	0	0	0	0	0	0	0	0	0	0.00652996	1.3241	0.311007	0	0	1.0852	0.0281618	0	0.0146783	0.0484959	0.496678	0.0671864	0.099207	0	0	0	0	0	0	0	0	0	0	0	0	0	0	0	0	0	0.0900844	0	0	0	0
MAG180	d__Bacteria;p__Dormibacterota;c__Dormibacteria;o__Dormibacterales;f__Dormibacteraceae;g__40CM-4-65-16;s__Unclassified	Yunnan	0	0	0	0	0	0	0	0	0	0	0	0	0	0	0	0	0	0	0	0	0	0	0	0	0	0	0	0	0	0	0	0	0	0	0	0	0	0	0	0	0	0	0	0	0	0	0
MAG181	d__Bacteria;p__Actinomycetota;c__Actinomycetia;o__Actinomycetales;f__Dermatophilaceae;g__Unclassified;s__Unclassified	Guizhou、Yunnan、Jiangsu	0	0	0	0	0	0	0	0	0	0	0	0	0	0	0	0	0	0	0	0	0	0	0	0	0	0.483866	0.248478	0.356939	2.13211	0.401025	0.434428	1.62413	0.433636	1.62149	0.459243	2.92799	0.436325	0	3.34182	0.59789	0.635413	2.28013	3.47933	0.387654	0.193634	0.984757	0.0804745
MAG182	d__Bacteria;p__Actinomycetota;c__Actinomycetia;o__Mycobacteriales;f__Mycobacteriaceae;g__Mycobacterium;s__Mycobacterium sp023460175	Sichuan、Jiangsu	0.023629	1.1176	0.234844	0	0.524595	0	0.619176	0.0564256	0	0	0	0	0	0.267717	0.0633847	0.341487	0	0	0	0.0996315	0	0	0.0339904	0	0.596199	0	0	0	0	0	0	0	0	0	0	0	0	0	0	0	0	0	0	0	0	0	0
MAG183	d__Bacteria;p__Bacillota;c__Bacilli;o__Bacillales_D;f__Amphibacillaceae;g__Virgibacillus_B;s__Unclassified	Sichuan、Yunnan	0	0	0	0	0.142714	0	0	0	0	0	0	0	0.191015	0	0.180568	0.117314	0	0.10906	0	0	0.486292	0	0	2.8018	0.297985	0	0	0	0	0	0	0	0	0	0	0	0	0	0	0	0	0	0	0	0	0	0
MAG184	d__Bacteria;p__Actinomycetota;c__Actinomycetia;o__Actinomycetales;f__Microbacteriaceae;g__Curtobacterium;s__Unclassified	Jiangsu	0	0	0	0	0	0	0	0	0	0	0	0	0	0	0	0	0	0	0	0	0	0	0	0	0	0	0	0	0	0	0	0	0	0	0	0	0	0	0	0	0	0	0	0	0	0	0
MAG185	d__Bacteria;p__Pseudomonadota;c__Gammaproteobacteria;o__Burkholderiales;f__Burkholderiaceae_B;g__Ramlibacter;s__Unclassified	Yunnan	0	0	0	0	0	0	0	0	0	0	0	0	0	0	0	0	0	0	0	0	0	0	0	0	0	0	0	0	0	0	0	0	0	0	0	0	0	0	0	0	0	0	0	0	0	0	0
MAG186	d__Bacteria;p__Pseudomonadota;c__Gammaproteobacteria;o__Burkholderiales;f__Burkholderiaceae_B;g__Ramlibacter;s__Unclassified	Guizhou、Yunnan、Jiangsu	0	0	0	0	0	0	0	0	0	0	0	0	0	0	0	0	0	0	0	0	0	0	0	0	0	0	0	0.240586	0.767351	0	0	0.147556	0	0.705452	0	0.553197	0	0	0.440986	0.182794	0	0.108607	0	0	0	0.195837	0
MAG187	d__Bacteria;p__Actinomycetota;c__Actinomycetia;o__Propionibacteriales;f__Propionibacteriaceae;g__Luteococcus;s__Luteococcus japonicus	Sichuan	0.374971	0	0	0.14162	0	0	0	0	0	0	0	0	0	0	0	0	0	0	0.526058	0	0.0182009	0	0.0618112	0	0	0	0	0	0	0	0	0	0	0	0	0	0	0	0	0	0	0	0	0	0	0	0
MAG188	d__Bacteria;p__Actinomycetota;c__Actinomycetia;o__Mycobacteriales;f__Mycobacteriaceae;g__Corynebacterium;s__Unclassified	Sichuan	0.433211	0	0.621164	0.288518	0	0.036224	0	0	0	0	0	0	0	0	0	0	0	0.0186062	0.500283	0	0.0180803	0	0.0669268	0	0	0	0	0	0	0	0	0	0	0	0	0	0	0	0	0	0	0	0	0	0	0	0
MAG189	d__Bacteria;p__Pseudomonadota;c__Alphaproteobacteria;o__Sphingomonadales;f__Sphingomonadaceae;g__Allosphingosinicella;s__Unclassified	Sichuan、Jiangsu	0	0	0	0	0	0	0	0	0	0	0	0.0556034	0	0	0	0	0	0	0	0	0	0	0	0	0	0	0	0	0	0	0	0	0	0	0	0	0	0	0	0	0	0	0	0	0	0	0
MAG19	d__Bacteria;p__Gemmatimonadota;c__Gemmatimonadetes;o__Gemmatimonadales;f__Gemmatimonadaceae;g__JABFXC01;s__Unclassified	Guizhou、Yunnan	0	0	0	0	0	0	0	0	0	0	0	0	0	0	0	0	0	0	0	0	0	0	0	0	0	0	0	0	0.3925	0	0	0	0	1.71359	0	0.37099	0	0	0.223338	0	0	0	0	0	0	0	0
MAG190	d__Bacteria;p__Acidobacteriota;c__Vicinamibacteria;o__Vicinamibacterales;f__2-12-FULL-66-21;g__JACDCA01;s__Unclassified	Sichuan、Guizhou	0	6.37049	0	0	0.520033	0	0.831224	0	0	0.307033	0	0	0	0	0.317632	0.715141	0.117842	0	0	0.277842	0	0	0	0	0.973354	0	0	0	0	0	0	0	0	0	0	0	0	0	0	0	0.166719	0	0	0	0	0	0
MAG191	d__Bacteria;p__Tectomicrobia;c__Entotheonellia;o__Entotheonellales;f__Entotheonellaceae;g__SXND01;s__Unclassified	Guizhou、Yunnan	0	0	0	0	0	0	0	0	0	0	0	0	0	0	0	0	0	0	0	0	0	0	0	0	0	0.227952	0	0.146925	0.404136	0.507919	0.258547	0.222919	2.71606	0	0.66624	0.209625	0.721388	0	0.25382	0.221594	0	0.569911	0.267861	2.17774	1.86235	0.851495	0
MAG192	d__Bacteria;p__Bacteroidota;c__Bacteroidia;o__Chitinophagales;f__Chitinophagaceae;g__Flavisolibacter;s__Unclassified	Guizhou、Yunnan	0	0	0	0	0	0	0	0	0	0	0	0	0	0	0	0	0	0	0	0	0	0	0	0	0	0	0	0	0.656142	0	0	0	0	1.05877	0	0.589877	0	0	0.432739	0	0	0	0	0	0	0	0
MAG193	d__Bacteria;p__Acidobacteriota;c__Thermoanaerobaculia;o__UBA5704;f__UBA5704;g__UBA5704;s__Unclassified	Jiangsu	0	0	0	0	0	0	0	0	0	0	0	0	0	0	0	0	0	0	0	0	0	0	0	0	0	0	0	0	0	0	0	0	0	0	0	0	0	0	0	0	0	0	0	0	0	0	0
MAG194	d__Bacteria;p__Acidobacteriota;c__Blastocatellia;o__Pyrinomonadales;f__Pyrinomonadaceae;g__Unclassified;s__Unclassified	Sichuan、Guizhou	0	0	0	0	0	0	0	0	0	0	0	2.7953	0	0	0	0	0	0	0	0	0	0	0	0	0	0	0	0.129277	0	0	0	0.318262	0	0	0	0	0	0	0	0	0	0	0	0	0	0	0
MAG195	d__Bacteria;p__Nitrospirota;c__Nitrospiria;o__Nitrospirales;f__Nitrospiraceae;g__Nitrospira_F;s__Unclassified	Sichuan、Guizhou、Jiangsu	0	2.22938	0	0.426593	1.00928	0.0511305	0.775685	0	0.738239	1.60073	0	0.0548583	0	0	0.255807	1.00252	0	0	0	2.28577	0	0.208988	0	0	0.894644	0.394139	0.333932	0	0	0	0.681675	0	0	0	0.272195	0	0.218683	0.293475	0	0.0797613	0.756825	0.118303	0.0860971	0	0	0	0
MAG196	d__Bacteria;p__Pseudomonadota;c__Gammaproteobacteria;o__Xanthomonadales;f__Xanthomonadaceae;g__Thermomonas;s__Unclassified	Sichuan、Guizhou	0	0	0	0	0	0	0	3.49024	0.830906	0.567363	0.54533	0	0	0	0	0	0	0	0.171406	0	0	0.523685	0	0	0	0	0	0	0	0	0	0	0	0	0	0	0	0	0	0	0	0.530177	0	0	0	0	0
MAG197	d__Bacteria;p__Bacillota;c__Bacilli;o__Staphylococcales;f__Staphylococcaceae;g__Mammaliicoccus;s__Mammaliicoccus sciuri	Sichuan、Jiangsu	0.0424794	0	0.165721	0	0	0	0	0	0	0	0	0	0	0	0	0	0	0.0187617	0	0	0.0427157	0	0.0419348	0	0	0	0	0	0	0	0	0	0	0	0	0	0	0	0	0	0	0	0	0	0	0	0
MAG198	d__Bacteria;p__Pseudomonadota;c__Alphaproteobacteria;o__Rhizobiales;f__Xanthobacteraceae;g__Nitrobacter;s__Unclassified	Sichuan、Guizhou、Yunnan、Jiangsu	0	0.0837679	0	0.098288	0.228884	0	0.25492	0.0918264	0.237993	0.165285	0.689506	0.0714069	0	0	0.164787	0.157141	0.183109	0	0.0507186	0.11483	0	0.134735	0	0	0.177286	0	0.243186	0.17609	0	0.140966	0.189465	0	0	0	0	0	0	0.247116	0	0	0.238264	0.152148	0.0784202	0	0	0	0
MAG199	d__Bacteria;p__Actinomycetota;c__Actinomycetia;o__Mycobacteriales;f__Mycobacteriaceae;g__Corynebacterium;s__Corynebacterium crudilactis	Sichuan	0	0	0.0501748	0	0	0	0	0	0	0	0	0	0.410086	0	0.202069	0	0	1.58573	0	0	0.42883	0	0.0770036	1.77173	0.288657	0	0	0	0	0	0	0	0	0	0	0	0	0	0	0	0	0	0	0	0	0	0
MAG2	d__Bacteria;p__Gemmatimonadota;c__Gemmatimonadetes;o__Longimicrobiales;f__Longimicrobiaceae;g__Longimicrobium;s__Unclassified	Yunnan	0	0	0	0	0	0	0	0	0	0	0	0	0	0	0	0	0	0	0	0	0	0	0	0	0	0	0	0	0	0	0	0	0	0	0	0	0	0	0	0	0	0	0	0	0	0	0
MAG20	d__Bacteria;p__Nitrospirota;c__Nitrospiria;o__Nitrospirales;f__Nitrospiraceae;g__Nitrospira_F;s__Unclassified	Sichuan、Guizhou	0	0	0	0	0.0701177	0	0	0	0	0.240023	0	0	0	0	0	0.109245	0	0	0	0	0	0	0	0	0	2.51451	3.28181	0.190326	0	0	1.955	1.22453	0	0	3.34157	0	0	0.31795	0	0.8588	0.248587	2.20366	2.81958	0	0	1.87606	0
MAG200	d__Bacteria;p__Actinomycetota;c__Actinomycetia;o__Mycobacteriales;f__Mycobacteriaceae;g__Dietzia;s__Dietzia aerolata	Sichuan、Jiangsu	0	0	1.13874	0	0	0	0	0.178211	0	0	0	0	0.0105589	4.01248	0.0694907	0	0	0.0148741	0	0	0.0434903	0	0.0903826	0.0450557	0	0	0	0	0	0	0	0	0	0	0	0	0	0	0	0	0	0	0	0	0	0	0
MAG201	d__Bacteria;p__Bacillota;c__Bacilli;o__Erysipelotrichales;f__Erysipelotrichaceae;g__Erysipelothrix;s__Unclassified	Sichuan	0	0	0	0	0	0	0	0	0	0	0	0	0.3789	0	0	0	0	0.101847	0	0	0.255759	0	0	0.0253112	0	0	0	0	0	0	0	0	0	0	0	0	0	0	0	0	0	0	0	0	0	0	0
MAG202	d__Bacteria;p__Actinomycetota;c__Actinomycetia;o__Actinomycetales;f__Dermatophilaceae;g__Terrabacter;s__Unclassified	Yunnan	0	0	0	0	0	0	0	0	0	0	0	0	0	0	0	0	0	0	0	0	0	0	0	0	0	0	0	0	0	0	0	0	0	0	0	0	0	0	0	0	0	0	0	0	0	0	0
MAG203	d__Bacteria;p__Actinomycetota;c__Acidimicrobiia;o__Acidimicrobiales;f__JACDEA01;g__JACCXE01;s__Unclassified	Yunnan	0	0	0	0	0	0	0	0	0	0	0	0	0	0	0	0	0	0	0	0	0	0	0	0	0	0	0	0	0	0	0	0	0	0	0	0	0	0	0	0	0	0	0	0	0	0	0
MAG204	d__Bacteria;p__Pseudomonadota;c__Gammaproteobacteria;o__Steroidobacterales;f__Steroidobacteraceae;g__SCUD01;s__Unclassified	Sichuan、Guizhou、Jiangsu	0	0	0	0	0.164204	0	0	0	0	0.167608	0	0	0	0	0	0.241827	0	0	0	0	0	0	0	0	0	0	0.273971	0	0	0	0	0	0	0	0	0	0	0	0	0	0	0	0	0	0	0	0
MAG205	d__Bacteria;p__Patescibacteria;c__SICC01;o__SICC01;f__SICC01;g__Unclassified;s__Unclassified	Yunnan	0	0	0	0	0	0	0	0	0	0	0	0	0	0	0	0	0	0	0	0	0	0	0	0	0	0	0	0	0	0	0	0	0	0	0	0	0	0	0	0	0	0	0	0	0	0	0
MAG206	d__Bacteria;p__Actinomycetota;c__Actinomycetia;o__Actinomycetales;f__Microbacteriaceae;g__Agromyces;s__Unclassified	Guizhou、Jiangsu	0	0	0	0	0	0	0	0	0	0	0	0	0	0	0	0	0	0	0	0	0	0	0	0	0	0	0.498075	0	0	0	0.46305	0	0	0	0	0	0	0	0	0.230549	0.343846	0.555154	0.0979736	0	0	0.0936235	0
MAG207	d__Bacteria;p__Acidobacteriota;c__Blastocatellia;o__Pyrinomonadales;f__Pyrinomonadaceae;g__Unclassified;s__Unclassified	Yunnan	0	0	0	0	0	0	0	0	0	0	0	0	0	0	0	0	0	0	0	0	0	0	0	0	0	0	0	0	0	0	0	0	0	0	0	0	0	0	0	0	0	0	0	0	0	0	0
MAG208	d__Bacteria;p__Bacteroidota;c__Bacteroidia;o__Chitinophagales;f__Chitinophagaceae;g__Flavitalea;s__Unclassified	Sichuan、Guizhou、Jiangsu	0	0	0	0	0.426701	0	0	0	0	0	0	0	0	0	0	0.132174	0	0	0.0319622	0	0	0	0	0	0	0.389551	1.0555	0.285314	0	0	0	0.0742265	0	0	0.165717	0	0	0.452226	0	0.183302	0.558117	1.21567	0.389186	0	0	0.23085	0.0797127
MAG209	d__Bacteria;p__Pseudomonadota;c__Gammaproteobacteria;o__Burkholderiales;f__Burkholderiaceae_A;g__Unclassified;s__Unclassified	Sichuan、Guizhou	0	0	0	0	0	0	0	0	0.118177	0.340206	0	3.27145	0	0	0	0	0	0	0	0.263718	0	0.0883539	0	0	0	0	0	0	0	0	0.310887	0	0	0	0	0	0	0	0	0	0	0	0	0	0	0	0
MAG21	d__Bacteria;p__Pseudomonadota;c__Gammaproteobacteria;o__Xanthomonadales;f__Rhodanobacteraceae;g__Oleiagrimonas;s__Unclassified	Sichuan	0	0	0	0	0	23.4524	0	0	0	0	0	0	0	0	0	0	0	0	0	0	0	0	0	0	0	0	0	0	0	0	0	0	0	0	0	0	0	0	0	0	0	0	0	0	0	0	0
MAG210	d__Bacteria;p__Bacteroidota;c__Bacteroidia;o__Chitinophagales;f__Chitinophagaceae;g__Unclassified;s__Unclassified	Guizhou、Yunnan	0	0	0	0	0	0	0	0	0	0	0	0	0	0	0	0	0	0	0	0	0	0	0	0	0	0	0	0	3.39832	0.185098	0	0	0	0.487406	0	1.36282	0	0	1.73325	0	0	0.214273	0	0	0.172052	0.291515	0
MAG211	d__Bacteria;p__Actinomycetota;c__Actinomycetia;o__Propionibacteriales;f__Propionibacteriaceae;g__Arachnia;s__Arachnia massiliensis_A	Sichuan、Jiangsu	0.0443677	0	1.27085	0	0	0	0	0.20832	0	0	0	0	0	0.0597078	0	0	0	0	0.0926871	0	0	0	0.248327	0	0	0	0	0	0	0	0	0	0	0	0	0	0	0	0	0	0	0	0	0	0	0	0
MAG212	d__Bacteria;p__Actinomycetota;c__Actinomycetia;o__Actinomycetales;f__Micrococcaceae;g__Kocuria;s__Kocuria rosea	Sichuan、Guizhou、Jiangsu	0	0	0	0	0	0	0	0.0777132	0	0	0.44389	0	0	0	0.273817	0	0.499531	0	0	0	0	0	0	0	0	0	0.275194	0	0	0	0.186324	0	0	0	0	0	0	0.389827	0	0.198106	0.345555	0	0	0	0	0	0
MAG213	d__Bacteria;p__Actinomycetota;c__Thermoleophilia;o__Gaiellales;f__Gaiellaceae;g__PALSA-600;s__Unclassified	Yunnan	0	0	0	0	0	0	0	0	0	0	0	0	0	0	0	0	0	0	0	0	0	0	0	0	0	0	0	0	0	0	0	0	0	0	0	0	0	0	0	0	0	0	0	0	0	0	0
MAG214	d__Bacteria;p__Acidobacteriota;c__Vicinamibacteria;o__Vicinamibacterales;f__UBA2999;g__12-FULL-67-14b;s__Unclassified	Yunnan	0	0	0	0	0	0	0	0	0	0	0	0	0	0	0	0	0	0	0	0	0	0	0	0	0	0	0	0	0	0	0	0	0	0	0	0	0	0	0	0	0	0	0	0	0	0	0
MAG215	d__Bacteria;p__Bacillota;c__Bacilli;o__Staphylococcales;f__Salinicoccaceae;g__Jeotgalicoccus;s__Jeotgalicoccus coquinae	Sichuan、Yunnan	0	0	0.377024	0	0.134097	0	0.158545	0	0	0.135203	0	0	1.78676	0.606221	1.27349	0.10808	0	7.61393	0	0.115413	4.50169	0	0.0674126	3.38642	1.08345	0	0	0	0	0	0	0	0	0	0	0	0	0	0	0	0	0	0	0	0	0	0
MAG216	d__Bacteria;p__Pseudomonadota;c__Alphaproteobacteria;o__Caulobacterales;f__Caulobacteraceae;g__Phenylobacterium;s__Unclassified	Yunnan	0	0	0	0	0	0	0	0	0	0	0	0	0	0	0	0	0	0	0	0	0	0	0	0	0	0	0	0	0	0	0	0	0	0	0	0	0	0	0	0	0	0	0	0	0	0	0
MAG217	d__Bacteria;p__Actinomycetota;c__Actinomycetia;o__Actinomycetales;f__Micrococcaceae;g__Glutamicibacter;s__Unclassified	Sichuan	0.198204	0	0.0307855	0	0	0	0	0	0	0.0803974	0	0	0.0499999	0.178423	0.168764	0	0	0.113234	0	0	0.0602366	0	0.0322761	0.590467	0.0700593	0	0	0	0	0	0	0	0	0	0	0	0	0	0	0	0	0	0	0	0	0	0
MAG218	d__Bacteria;p__Pseudomonadota;c__Gammaproteobacteria;o__Burkholderiales;f__SG8-39;g__SCGC-AG-212-J23;s__Unclassified	Sichuan、Guizhou、Jiangsu	0	0	0	0	0.298375	0	0	0	0	0.214509	0	0.410756	0	0	0	0.408981	0	0	0	0.0930079	0	0	0	0	0	0.842112	0.278712	0	0	0	0.690013	0.0991043	0.187356	0	1.18419	0	0.222245	0.400799	0	0.356886	1.1608	0.106056	0.0926394	0.270861	0.160245	0.420148	0.0648826
MAG219	d__Bacteria;p__Pseudomonadota;c__Alphaproteobacteria;o__Sphingomonadales;f__Sphingomonadaceae;g__Sphingomicrobium;s__Unclassified	Guizhou	0	0	0	0	0	0	0	0	0	0	0	0	0	0	0	0	0	0	0	0	0	0	0	0	0	0	0	0	0.493005	0	0	0	0	10.594	0	0.514042	0	0	0	0	0	0	0	0	0	0	0
MAG22	d__Bacteria;p__Actinomycetota;c__Acidimicrobiia;o__Acidimicrobiales;f__AC-14;g__CADCTB01;s__Unclassified	Yunnan	0	0	0	0	0	0	0	0	0	0	0	0	0	0	0	0	0	0	0	0	0	0	0	0	0	0	0	0	0	0	0	0	0	0	0	0	0	0	0	0	0	0	0	0	0	0	0
MAG220	d__Bacteria;p__Chloroflexota;c__Limnocylindria;o__QHBO01;f__QHBO01;g__JACDBZ01;s__Unclassified	Sichuan、Guizhou、Jiangsu	0	0	0	0	0.187262	0	0	0	0	0.209167	0	0.144204	0	0	0	0.22086	0	0	0	0.239295	0	0	0	0	0	0	0.115388	0	0	0	0	0	0	0	0	0	0	0	0	0.304216	0	0.109123	0.074773	0	0	0	0
MAG221	d__Bacteria;p__Gemmatimonadota;c__Gemmatimonadetes;o__Longimicrobiales;f__RSA9;g__Unclassified;s__Unclassified	Yunnan	0	0	0	0	0	0	0	0	0	0	0	0	0	0	0	0	0	0	0	0	0	0	0	0	0	0	0	0	0	0	0	0	0	0	0	0	0	0	0	0	0	0	0	0	0	0	0
MAG222	d__Bacteria;p__Acidobacteriota;c__Vicinamibacteria;o__Vicinamibacterales;f__UBA2999;g__12-FULL-67-14b;s__Unclassified	Yunnan	0	0	0	0	0	0	0	0	0	0	0	0	0	0	0	0	0	0	0	0	0	0	0	0	0	0	0	0	0	0	0	0	0	0	0	0	0	0	0	0	0	0	0	0	0	0	0
MAG223	d__Bacteria;p__Gemmatimonadota;c__Gemmatimonadetes;o__Gemmatimonadales;f__GWC2-71-9;g__Unclassified;s__Unclassified	Jiangsu	0	0	0	0	0	0	0	0	0	0	0	0	0	0	0	0	0	0	0	0	0	0	0	0	0	0	0	0	0	0	0	0	0	0	0	0	0	0	0	0	0	0	0	0	0	0	0
MAG224	d__Bacteria;p__Bacillota;c__Bacilli;o__Erysipelotrichales;f__Erysipelotrichaceae;g__Erysipelothrix;s__Erysipelothrix sp012520695	Sichuan、Yunnan	0	0	0.0107717	0	0	0	0	0	0	0	0	0	0.595838	0	0	0	0	0.150623	0	0	1.10725	0	0	0.0274291	0	0	0	0	0	0	0	0	0	0	0	0	0	0	0	0	0	0	0	0	0	0	0
MAG225	d__Bacteria;p__Bacillota_A;c__Clostridia;o__Tissierellales;f__Peptoniphilaceae;g__Gallicola;s__Gallicola sp012798975	Sichuan、Yunnan	0.147993	0	0.205377	0.354989	0	0	0	0.220002	0	0	0	0	0	0.104526	0	0	0	0	0.220961	0	0.020782	0	0.268791	0	0	0	0	0	0	0	0	0	0	0	0	0	0	0	0	0	0	0	0	0	0	0	0
MAG226	d__Bacteria;p__Eremiobacterota;c__Eremiobacteria;o__Baltobacterales;f__Baltobacteraceae;g__Unclassified;s__Unclassified	Jiangsu	0	0	0	0	0	0	0	0	0	0	0	0	0	0	0	0	0	0	0	0	0	0	0	0	0	0	0	0	0	0	0	0	0	0	0	0	0	0	0	0	0	0	0	0	0	0	0
MAG227	d__Bacteria;p__Chloroflexota;c__Limnocylindria;o__Limnocylindrales;f__CSP1-4;g__Unclassified;s__Unclassified	Sichuan	0	0	0	3.07144	0	0.452748	1.5389	0	0.191531	0.205661	0	0	0	0	0.0517029	0	0	0	0.0697839	0.0904065	0	0.137376	0	0	0.833464	0	0	0	0	0	0	0	0	0	0	0	0	0	0	0	0	0	0	0	0	0	0
MAG228	d__Bacteria;p__Patescibacteria;c__Saccharimonadia;o__Saccharimonadales;f__Unclassified;g__Unclassified;s__Unclassified	Yunnan	0	0	0	0	0	0	0	0	0	0	0	0	0	0	0	0	0	0	0	0	0	0	0	0	0	0	0	0	0	0	0	0	0	0	0	0	0	0	0	0	0	0	0	0	0	0	0
MAG229	d__Archaea;p__Thermoproteota;c__Nitrososphaeria;o__Nitrososphaerales;f__Nitrososphaeraceae;g__Nitrososphaera;s__Unclassified	Guizhou、Jiangsu	0	0	0	0	0	0	0	0	0	0	0	0	0	0	0	0	0	0	0	0	0	0	0	0	0	0	0	0.246968	0	0.140093	0	0	0.20983	0	0	0	0.105826	0	0	0	0	0	0	0.2328	0.224333	0	0.184048
MAG23	d__Bacteria;p__Acidobacteriota;c__Vicinamibacteria;o__Vicinamibacterales;f__UBA2999;g__12-FULL-67-14b;s__Unclassified	Sichuan、Guizhou、Jiangsu	0	0	0	0	0.296665	0	0	0	0.272834	0.334737	0.183544	0.208664	0	0	0	0.27206	0	0	0	0.293932	0	0.152202	0	0	0	0.448055	0.199237	0.328619	0	0.306745	0.481889	0.0882384	0.12256	0	0.362216	0	0.142451	1.17121	0	0.13381	0.472079	0.185671	0.166002	0	0	0	0.135358
MAG230	d__Bacteria;p__Actinomycetota;c__Actinomycetia;o__Mycobacteriales;f__Mycobacteriaceae;g__Dietzia;s__Unclassified	Sichuan	0.0295235	0	0.247429	0	0.0613932	0	0	0.133484	0	0	0	0	0.0102925	1.26736	0.0924315	0	0	0.0188786	0	0	0.0426291	0	0.236525	0.0782084	0.150927	0	0	0	0	0	0	0	0	0	0	0	0	0	0	0	0	0	0	0	0	0	0
MAG231	d__Bacteria;p__Bacteroidota;c__Bacteroidia;o__Chitinophagales;f__Chitinophagaceae;g__JAEZDC01;s__Unclassified	Sichuan	0	0	0	0	0	0	0	0	0	0	0	0	0	0	0	0	2.69995	0	0	0	0	0	0	0	0	0	0	0	0	0	0	0	0	0	0	0	0	0	0	0	0	0	0	0	0	0	0
MAG232	d__Bacteria;p__Pseudomonadota;c__Gammaproteobacteria;o__Pseudomonadales;f__Moraxellaceae;g__Psychrobacter;s__Psychrobacter pasteurii	Sichuan、Yunnan	0	0	0	0	0	0	0	0	0	0	0	0	0.100113	0	0	0	0	0.483691	0	0	0.566167	0	0	0	0	0	0	0	0	0	0	0	0	0	0	0	0	0	0	0	0	0	0	0	0	0	0
MAG233	d__Archaea;p__Thermoproteota;c__Nitrososphaeria;o__Nitrososphaerales;f__Nitrososphaeraceae;g__Nitrosocosmicus;s__Nitrosocosmicus oleophilus	Sichuan、Guizhou、Yunnan、Jiangsu	0	0	0	0	0.104377	0	0	0	0.341597	0.127447	0	0	0	0	0	0.140254	0	0	0	0	0	0.120276	0	0	0	0.337139	0.16587	0.734495	3.91026	1.07148	0.570555	0.199453	0.566279	2.68386	0.622965	4.41491	0.75902	0.348988	4.62268	0.972093	0.515007	0.271787	0.228595	0.724713	1.04553	0.46505	0.207013
MAG234	d__Bacteria;p__Acidobacteriota;c__Terriglobia;o__Bryobacterales;f__Bryobacteraceae;g__Bog-105;s__Unclassified	Jiangsu	0	0	0	0	0	0	0	0	0	0	0	0	0	0	0	0	0	0	0	0	0	0	0	0	0	0	0	0	0	0	0	0	0	0	0	0	0	0	0	0	0	0	0	0	0	0	0
MAG235	d__Bacteria;p__Patescibacteria;c__Saccharimonadia;o__Saccharimonadales;f__EFPC-124;g__EFPC-124;s__Unclassified	Yunnan	0	0	0	0	0	0	0	0	0	0	0	0	0	0	0	0	0	0	0	0	0	0	0	0	0	0	0	0	0	0	0	0	0	0	0	0	0	0	0	0	0	0	0	0	0	0	0
MAG236	d__Bacteria;p__Actinomycetota;c__Thermoleophilia;o__Solirubrobacterales;f__70-9;g__Unclassified;s__Unclassified	Yunnan	0	0	0	0	0	0	0	0	0	0	0	0	0	0	0	0	0	0	0	0	0	0	0	0	0	0	0	0	0	0	0	0	0	0	0	0	0	0	0	0	0	0	0	0	0	0	0
MAG237	d__Bacteria;p__Pseudomonadota;c__Alphaproteobacteria;o__Rhizobiales;f__Rhizobiaceae;g__Paenochrobactrum;s__Paenochrobactrum gallinarii	Sichuan	0	0	0.200386	0	0	0	0	0	0	0	0	0	0	0	0	0	0	0	0	0	0	0	0	0	0	0	0	0	0	0	0	0	0	0	0	0	0	0	0	0	0	0	0	0	0	0	0
MAG238	d__Bacteria;p__Bacillota;c__Bacilli;o__Exiguobacterales;f__Exiguobacteraceae;g__Exiguobacterium_A;s__Exiguobacterium_A indicum	Sichuan、Jiangsu	0	0	0	0	0	0	0	0.0774918	0	0	0	0	0	0.0200613	0.0770841	0	0	0	0	0	0	0.0545519	0	0	0	0	0	0	0	0	0	0	0	0	0	0	0	0	0	0	0	0	0	0	0	0	0
MAG239	d__Bacteria;p__Dormibacterota;c__Dormibacteria;o__Unclassified;f__Unclassified;g__Unclassified;s__Unclassified	Yunnan	0	0	0	0	0	0	0	0	0	0	0	0	0	0	0	0	0	0	0	0	0	0	0	0	0	0	0	0	0	0	0	0	0	0	0	0	0	0	0	0	0	0	0	0	0	0	0
MAG24	d__Bacteria;p__Actinomycetota;c__Actinomycetia;o__Actinomycetales;f__Dermatophilaceae;g__Flexivirga;s__Unclassified	Jiangsu	0	0	0	0	0	0	0	0	0	0	0	0	0	0	0	0	0	0	0	0	0	0	0	0	0	0	0	0	0	0	0	0	0	0	0	0	0	0	0	0	0	0	0	0	0	0	0
MAG240	d__Bacteria;p__Actinomycetota;c__Acidimicrobiia;o__IMCC26256;f__JACDBD01;g__JACDBD01;s__Unclassified	Yunnan	0	0	0	0	0	0	0	0	0	0	0	0	0	0	0	0	0	0	0	0	0	0	0	0	0	0	0	0	0	0	0	0	0	0	0	0	0	0	0	0	0	0	0	0	0	0	0
MAG241	d__Bacteria;p__Bacillota;c__Bacilli;o__Lactobacillales;f__Carnobacteriaceae;g__Alkalibacterium;s__Unclassified	Sichuan、Yunnan	0	0	0.00668803	0	0	0	0	0	0	0	0	0	0.151694	0.0461543	0.0475357	0	0	0.0963164	0	0	0.500892	0	0	0.461715	0	0	0	0	0	0	0	0	0	0	0	0	0	0	0	0	0	0	0	0	0	0	0
MAG242	d__Bacteria;p__Chloroflexota;c__Chloroflexia;o__Thermomicrobiales;f__UBA6265;g__UBA6265;s__Unclassified	Sichuan、Yunnan	0	0	0.0501803	0	0	0	0	0	0	0	0	0	0	0	0	0	0	0	0	0	0	0	2.33429	0	0	0	0	0	0	0	0	0	0	0	0	0	0	0	0	0	0	0	0	0	0	0	0
MAG243	d__Bacteria;p__Actinomycetota;c__Actinomycetia;o__Actinomycetales;f__Microbacteriaceae;g__Microbacterium;s__Unclassified	Sichuan、Jiangsu	0.029839	0	0	0	0	0	0	0	0	0	0	0	0	0	0	0	0	0	0.0290858	0	0	0	0.0287731	0	0	0	0	0	0	0	0	0	0	0	0	0	0	0	0	0	0	0	0	0	0	0	0
MAG244	d__Bacteria;p__Actinomycetota;c__Thermoleophilia;o__Gaiellales;f__Gaiellaceae;g__JACCRW01;s__Unclassified	Guizhou、Yunnan	0	0	0	0	0	0	0	0	0	0	0	0	0	0	0	0	0	0	0	0	0	0	0	0	0	0	0	0	0	0	0	0	0	0.242091	0	0.194102	0	0	0	0	0	0	0	0	0	0	0
MAG245	d__Bacteria;p__Bacteroidota;c__Bacteroidia;o__Flavobacteriales;f__Weeksellaceae;g__MFBS3-17;s__MFBS3-17 sp014041915	Sichuan	1.4045	0	0	0.0697381	0	0.118313	0.278064	0.0858	0	0.268606	0	0	0	0.896995	0.29095	0	0.0711657	0	0.648599	0	0	0.273146	0.294609	0	0	0	0	0	0	0	0	0	0	0	0	0	0	0	0	0	0	0	0	0	0	0	0
MAG246	d__Bacteria;p__Actinomycetota;c__Thermoleophilia;o__Solirubrobacterales;f__70-9;g__Unclassified;s__Unclassified	Yunnan	0	0	0	0	0	0	0	0	0	0	0	0	0	0	0	0	0	0	0	0	0	0	0	0	0	0	0	0	0	0	0	0	0	0	0	0	0	0	0	0	0	0	0	0	0	0	0
MAG247	d__Bacteria;p__Pseudomonadota;c__Gammaproteobacteria;o__Burkholderiales;f__Nitrosomonadaceae;g__Nitrosospira;s__Nitrosospira multiformis_D	Sichuan、Guizhou、Yunnan、Jiangsu	0	0	0	0.23519	0	0	0	0	0.378009	0.184335	0	0	0	0	0	0.0641228	0	0	0.0282854	0	0	0	0	0	0	1.37079	0.580441	0	0.899994	0.0793317	0.259548	1.81363	0	0	1.62095	0.800548	0.411595	0	0.929657	0.0849124	0	1.36474	0.517572	0	0.206465	4.40907	0
MAG248	d__Bacteria;p__Bacillota_A;c__Clostridia;o__Peptostreptococcales;f__Anaerovoracaceae;g__VUNA01;s__VUNA01 sp002299625	Yunnan	0	0	0	0	0	0	0	0	0	0	0	0	0	0	0	0	0	0	0	0	0	0	0	0	0	0	0	0	0	0	0	0	0	0	0	0	0	0	0	0	0	0	0	0	0	0	0
MAG249	d__Bacteria;p__Bacteroidota;c__Bacteroidia;o__Flavobacteriales;f__Weeksellaceae;g__Kaistella;s__Kaistella faecale	Sichuan、Guizhou	4.69995	0.0977021	0	0.678053	0.100717	0.528225	0.420665	2.03519	1.33465	0.451166	0.196182	0	0	0.010783	0.12645	0	0	0	7.6646	0.100713	0	1.63085	0.579348	0	0.0934776	0	0	0	0	0	0	0	0	0	0	0	0	0	0	0	0	0.701716	0.0940727	0	0	0	0.0769052
MAG25	d__Bacteria;p__Pseudomonadota;c__Alphaproteobacteria;o__Sphingomonadales;f__Sphingomonadaceae;g__Unclassified;s__Unclassified	Sichuan、Guizhou、Jiangsu	0	0.705188	0	0.0781394	0.475682	0	0.478372	0	0	0.178143	0.217428	0	0	0	0.0683309	0.431489	0	0	0.0261091	0.160868	0	0.0723609	0	0	0.65619	0.219363	0.215121	0	0.366126	0.122407	0.269339	0	0	0	0	0.305098	0	0	0.330676	0.160944	0.217926	0.342368	0.0901176	0	0	0.149991	0
MAG250	d__Bacteria;p__Pseudomonadota;c__Alphaproteobacteria;o__ATCC43930;f__Stellaceae;g__Unclassified;s__Unclassified	Guizhou、Yunnan	0	0	0	0	0	0	0	0	0	0	0	0	0	0	0	0	0	0	0	0	0	0	0	0	0	0	0	0	0	0	0	0	0	0	0	0	0	0	0	0	0	0	0	0	0	0	0
MAG251	d__Bacteria;p__Bacteroidota;c__Bacteroidia;o__Chitinophagales;f__Chitinophagaceae;g__Hanamia;s__Unclassified	Jiangsu	0	0	0	0	0	0	0	0	0	0	0	0	0	0	0	0	0	0	0	0	0	0	0	0	0	0	0	0	0	0	0	0	0	0	0	0	0	0	0	0	0	0	0	0	0	0	0
MAG252	d__Bacteria;p__Pseudomonadota;c__Alphaproteobacteria;o__Sphingomonadales;f__Sphingomonadaceae;g__Sphingopyxis;s__Unclassified	Jiangsu	0	0	0	0	0	0	0	0	0	0	0	0	0	0	0	0	0	0	0	0	0	0	0	0	0	0	0	0	0	0	0	0	0	0	0	0	0	0	0	0	0	0	0	0	0	0	0
MAG253	d__Bacteria;p__Bacteroidota;c__Bacteroidia;o__Flavobacteriales;f__Flavobacteriaceae;g__JAAYLC01;s__Unclassified	Sichuan、Yunnan	0	0	0.0312154	0	0	0	0	0	0	0	0	0	1.78644	0.168449	3.26045	0	0	0.0703517	0	0	0.22714	0	0.0695201	0.0497333	0.600585	0	0	0	0	0	0	0	0	0	0	0	0	0	0	0	0	0	0	0	0	0	0
MAG254	d__Bacteria;p__Actinomycetota;c__Actinomycetia;o__Mycobacteriales;f__Mycobacteriaceae;g__Corynebacterium;s__Corynebacterium glutamicum	Sichuan、Yunnan、Jiangsu	0.0469778	0	2.29707	0	0	0	0	0	0	0	0	0	0.0317851	0.101376	0.0778978	0	0	0.105366	0	0	0.0976145	0	0.38047	0.116883	0	0	0	0	0	0	0	0	0	0	0	0	0	0	0	0	0	0	0	0	0	0	0
MAG255	d__Bacteria;p__Dormibacterota;c__Dormibacteria;o__Dormibacterales;f__Dormibacteraceae;g__CF-28;s__Unclassified	Yunnan	0	0	0	0	0	0	0	0	0	0	0	0	0	0	0	0	0	0	0	0	0	0	0	0	0	0	0	0	0	0	0	0	0	0	0	0	0	0	0	0	0	0	0	0	0	0	0
MAG256	d__Bacteria;p__Actinomycetota;c__Actinomycetia;o__Actinomycetales;f__Dermatophilaceae;g__Ornithinicoccus;s__Unclassified	Sichuan	0	0	0.0159569	0	0	0	0	0.0785438	0	0.067996	0	0	0.00714729	1.09458	0.0888414	0	0	0	0	0	0.0417864	0	0.03556	0	0.35685	0	0	0	0	0	0	0	0	0	0	0	0	0	0	0	0	0	0	0	0	0	0
MAG257	d__Bacteria;p__Acidobacteriota;c__Thermoanaerobaculia;o__UBA5704;f__UBA5704;g__Unclassified;s__Unclassified	Guizhou、Yunnan、Jiangsu	0	0	0	0	0	0	0	0	0	0	0	0	0	0	0	0	0	0	0	0	0	0	0	0	0	0	0	0	0	0	0.135487	0.148132	0	0	0	0	0	0	0	0	0	0	0	0	0	0	0
MAG258	d__Bacteria;p__Actinomycetota;c__Actinomycetia;o__Propionibacteriales;f__Propionibacteriaceae;g__Unclassified;s__Unclassified	Sichuan	0	0	0.262345	0	0	0	0	0	0	0	0	0	0	0	0	0	0	0	0	0	0	0	0	0	0	0	0	0	0	0	0	0	0	0	0	0	0	0	0	0	0	0	0	0	0	0	0
MAG259	d__Bacteria;p__Actinomycetota;c__Actinomycetia;o__Actinomycetales;f__Microbacteriaceae;g__Microbacterium;s__Unclassified	Sichuan	0.698589	0	1.98293	0.237804	0.0610222	0.0904459	0.23751	0	0	0.0887561	0	0	0.0100225	0	0	0	0	0.0137951	0.407013	0	0.0262559	0	0.904299	0.0459155	0	0	0	0	0	0	0	0	0	0	0	0	0	0	0	0	0	0	0	0	0	0	0
MAG26	d__Bacteria;p__Pseudomonadota;c__Alphaproteobacteria;o__Sphingomonadales;f__Sphingomonadaceae;g__Erythrobacter;s__Unclassified	Jiangsu	0	0	0	0	0	0	0	0	0	0	0	0	0	0	0	0	0	0	0	0	0	0	0	0	0	0	0	0	0	0	0	0	0	0	0	0	0	0	0	0	0	0	0	0	0	0	0
MAG260	d__Bacteria;p__Pseudomonadota;c__Alphaproteobacteria;o__Acetobacterales;f__Acetobacteraceae;g__CADCTG01;s__Unclassified	Sichuan、Guizhou、Yunnan	0	0	0	0	0	0	0	0	0	0	0	0	0	0	0	0	0.0587186	0	0	0	0	0	0	0	0	0	0	0.329868	0	0	0	0	0	0	0	0.298147	0	2.99606	0	0	0	0	0	0	0	0	0.0717182
MAG261	d__Bacteria;p__Actinomycetota;c__Thermoleophilia;o__Gaiellales;f__Gaiellaceae;g__PALSA-600;s__Unclassified	Yunnan	0	0	0	0	0	0	0	0	0	0	0	0	0	0	0	0	0	0	0	0	0	0	0	0	0	0	0	0	0	0	0	0	0	0	0	0	0	0	0	0	0	0	0	0	0	0	0
MAG262	d__Bacteria;p__Actinomycetota;c__Actinomycetia;o__Mycobacteriales;f__Mycobacteriaceae;g__Corynebacterium;s__Corynebacterium sp012837295	Sichuan、Jiangsu	0.237836	0.056552	0.811202	0.241739	0.0641512	0	0	0.201404	0	0	0	0	0.00955612	0.499833	0.0442476	0	0	0.022192	0.166011	0	0.0442825	0	0.379325	0.0117356	0	0	0	0	0	0	0	0	0	0	0	0	0	0	0	0	0	0	0	0	0	0	0
MAG263	d__Bacteria;p__Acidobacteriota;c__Thermoanaerobaculia;o__Gp7-AA8;f__Gp7-AA8;g__JAENWF01;s__Unclassified	Yunnan	0	0	0	0	0	0	0	0	0	0	0	0	0	0	0	0	0	0	0	0	0	0	0	0	0	0	0	0	0	0	0	0	0	0	0	0	0	0	0	0	0	0	0	0	0	0	0
MAG264	d__Bacteria;p__Chloroflexota;c__Limnocylindria;o__P2-11E;f__P2-11E;g__CF-39;s__Unclassified	Yunnan	0	0	0	0	0	0	0	0	0	0	0	0	0	0	0	0	0	0	0	0	0	0	0	0	0	0	0	0	0	0	0	0	0	0	0	0	0	0	0	0	0	0	0	0	0	0	0
MAG265	d__Bacteria;p__Acidobacteriota;c__Vicinamibacteria;o__Vicinamibacterales;f__UBA2999;g__JACCSI01;s__Unclassified	Guizhou	0	0	0	0	0	0	0	0	0	0	0	0	0	0	0	0	0	0	0	0	0	0	0	0	0	0	0	0	0	0.105562	0	0	0	0	0	0	0	0.180526	0	0.0808604	0	0	0	0	0	0	2.93126
MAG266	d__Bacteria;p__Gemmatimonadota;c__Gemmatimonadetes;o__Gemmatimonadales;f__GWC2-71-9;g__Unclassified;s__Unclassified	Jiangsu	0	0	0	0	0	0	0	0	0	0	0	0	0	0	0	0	0	0	0	0	0	0	0	0	0	0	0	0	0	0	0	0	0	0	0	0	0	0	0	0	0	0	0	0	0	0	0
MAG267	d__Bacteria;p__Actinomycetota;c__Actinomycetia;o__Actinomycetales;f__Micrococcaceae;g__Kocuria;s__Unclassified	Jiangsu	0	0	0	0	0	0	0	0	0	0	0	0	0	0	0	0	0	0	0	0	0	0	0	0	0	0	0	0	0	0	0	0	0	0	0	0	0	0	0	0	0	0	0	0	0	0	0
MAG268	d__Bacteria;p__Chloroflexota;c__UBA6077;o__UBA6077;f__CF-72;g__Unclassified;s__Unclassified	Yunnan	0	0	0	0	0	0	0	0	0	0	0	0	0	0	0	0	0	0	0	0	0	0	0	0	0	0	0	0	0	0	0	0	0	0	0	0	0	0	0	0	0	0	0	0	0	0	0
MAG269	d__Bacteria;p__Chloroflexota;c__Limnocylindria;o__P2-11E;f__P2-11E;g__CF-39;s__Unclassified	Yunnan	0	0	0	0	0	0	0	0	0	0	0	0	0	0	0	0	0	0	0	0	0	0	0	0	0	0	0	0	0	0	0	0	0	0	0	0	0	0	0	0	0	0	0	0	0	0	0
MAG27	d__Bacteria;p__Actinomycetota;c__Actinomycetia;o__Actinomycetales;f__Cellulomonadaceae;g__Jonesia;s__Unclassified	Sichuan	0	0	0.244805	0	0	0	0	0	0	0	0	0	0	0	0	0	0	0	0	0	0	0	0.0979865	0	0	0	0	0	0	0	0	0	0	0	0	0	0	0	0	0	0	0	0	0	0	0	0
MAG270	d__Bacteria;p__Actinomycetota;c__Actinomycetia;o__Actinomycetales;f__Dermatophilaceae;g__Janibacter;s__Janibacter limosus	Sichuan	1.81002	0	0	0.925815	0	0.140462	0	0	0	0	0	0	0	0	0	0	0	0	0.581928	0	0	0	0.068612	0	0	0	0	0	0	0	0	0	0	0	0	0	0	0	0	0	0	0	0	0	0	0	0
MAG271	d__Bacteria;p__Myxococcota;c__Polyangia;o__Nannocystales;f__Nannocystaceae;g__Nannocystis;s__Unclassified	Sichuan、Guizhou、Jiangsu	0	2.85156	0	0	0.172831	0	0	0	0	0	0	0	0	0	0	0.171757	0	0	0	0	0	0	0	0	0.126167	0	0.146901	0	0	0	0	0	0	0	0	0	0	0	0	0	0	0	0	0	0	0	0
MAG272	d__Bacteria;p__Pseudomonadota;c__Alphaproteobacteria;o__Sphingomonadales;f__Sphingomonadaceae;g__Allosphingosinicella;s__Unclassified	Jiangsu	0	0	0	0	0	0	0	0	0	0	0	0	0	0	0	0	0	0	0	0	0	0	0	0	0	0	0	0	0	0	0	0	0	0	0	0	0	0	0	0	0	0	0	0	0	0	0
MAG273	d__Bacteria;p__Pseudomonadota;c__Alphaproteobacteria;o__Rhodobacterales;f__Rhodobacteraceae;g__Paracoccus;s__Paracoccus sp021491915	Sichuan、Guizhou、Yunnan、Jiangsu	0.0923917	0	0	0.0642337	0.228069	0	0	0.72019	0.340491	0.151544	1.61843	0	0	0	0.955037	0.118888	0.619149	0	0.139657	0.0708969	0	0.0476117	0.0731127	0	0.451481	0.406589	1.66088	0.444695	0	0.195901	0.428046	0.162566	0	0	0	0	0	0.682254	0	0.497587	0.767375	0.391419	0.224244	0	0	0	0.116501
MAG274	d__Bacteria;p__Patescibacteria;c__Doudnabacteria;o__UBA920;f__2-02-FULL-46-11;g__Unclassified;s__Unclassified	Jiangsu	0	0	0	0	0	0	0	0	0	0	0	0	0	0	0	0	0	0	0	0	0	0	0	0	0	0	0	0	0	0	0	0	0	0	0	0	0	0	0	0	0	0	0	0	0	0	0
MAG275	d__Bacteria;p__Bacillota;c__Bacilli;o__Lactobacillales;f__Lactobacillaceae;g__Limosilactobacillus;s__Limosilactobacillus intestinipullorum	Sichuan、Jiangsu	0.0701163	0	0.0210403	0	0	0	0	0	0	0	0	0	0.0349266	0	0.101409	0	0	0.155167	0.0301247	0	0.791892	0	0.025661	0.283806	0	0	0	0	0	0	0	0	0	0	0	0	0	0	0	0	0	0	0	0	0	0	0
MAG276	d__Bacteria;p__Actinomycetota;c__Actinomycetia;o__Actinomycetales;f__Beutenbergiaceae;g__Unclassified;s__Unclassified	Sichuan	0	0	0	0	0	0	0	0	0	0	0	0	0	0.592297	0	0	0	0	0	0	0	0	0	0	0	0	0	0	0	0	0	0	0	0	0	0	0	0	0	0	0	0	0	0	0	0	0
MAG277	d__Bacteria;p__Pseudomonadota;c__Alphaproteobacteria;o__Rhizobiales;f__Hyphomicrobiaceae;g__AWTP1-13;s__Unclassified	Sichuan、Guizhou、Yunnan、Jiangsu	0	0.267749	0	0	0.224578	0	0.199864	0	0.185392	0.42209	0	0.281216	0	0	0	0.282004	0	0	0	0.394942	0	0	0	0	0	1.23154	0.44012	0.472528	0.444192	0.657182	1.09249	0.54547	1.09889	0	1.52677	0.440192	0.928037	0.290333	0.405446	0.287933	0.753636	1.06511	0.855829	1.17514	1.2616	0.978907	0.667485
MAG278	d__Bacteria;p__Acidobacteriota;c__Vicinamibacteria;o__Vicinamibacterales;f__UBA2999;g__12-FULL-67-14b;s__Unclassified	Sichuan、Guizhou、Jiangsu	0	0.115303	0	0	0	0	0	0	0	0.134191	0	0	0	0	0	0	0	0	0	0	0	0	0	0	0	0	0	0	0	0	0	0	0	0	0	0	0	0	0	0	0	0	0	0	0	0	0
MAG279	d__Bacteria;p__Pseudomonadota;c__Gammaproteobacteria;o__Pseudomonadales;f__Pseudomonadaceae;g__Thiopseudomonas;s__Unclassified	Sichuan、Yunnan	0	0	0	0	0	0	0.152267	0	0	0	0	0	0.691353	0	0	0	0	4.28485	0	0	4.98616	0	0.0291247	0.0777799	0	0	0	0	0	0	0	0	0	0	0	0	0	0	0	0	0	0	0	0	0	0	0
MAG28	d__Bacteria;p__Actinomycetota;c__Actinomycetia;o__Actinomycetales;f__Micrococcaceae;g__Arthrobacter_K;s__Unclassified	Yunnan	0	0	0	0	0	0	0	0	0	0	0	0	0	0	0	0	0	0	0	0	0	0	0	0	0	0	0	0	0	0	0	0	0	0	0	0	0	0	0	0	0	0	0	0	0	0	0
MAG280	d__Bacteria;p__Pseudomonadota;c__Gammaproteobacteria;o__Burkholderiales;f__Burkholderiaceae_B;g__Rhizobacter;s__Unclassified	Yunnan	0	0	0	0	0	0	0	0	0	0	0	0	0	0	0	0	0	0	0	0	0	0	0	0	0	0	0	0	0	0	0	0	0	0	0	0	0	0	0	0	0	0	0	0	0	0	0
MAG281	d__Bacteria;p__Pseudomonadota;c__Alphaproteobacteria;o__Sphingomonadales;f__Sphingomonadaceae;g__Novosphingobium;s__Unclassified	Yunnan	0	0	0	0	0	0	0	0	0	0	0	0	0	0	0	0	0	0	0	0	0	0	0	0	0	0	0	0	0	0	0	0	0	0	0	0	0	0	0	0	0	0	0	0	0	0	0
MAG282	d__Bacteria;p__Pseudomonadota;c__Alphaproteobacteria;o__Sphingomonadales;f__Sphingomonadaceae;g__Erythrobacter;s__Unclassified	Jiangsu	0	0	0	0	0	0	0	0	0	0	0	0	0	0	0	0	0	0	0	0	0	0	0	0	0	0	0	0	0	0	0	0	0	0	0	0	0	0	0	0	0	0	0	0	0	0	0
MAG283	d__Bacteria;p__Bacteroidota;c__Bacteroidia;o__Chitinophagales;f__Chitinophagaceae;g__JAEWAC01;s__Unclassified	Yunnan	0	0	0	0	0	0	0	0	0	0	0	0	0	0	0	0	0	0	0	0	0	0	0	0	0	0	0	0	0	0	0	0	0	0	0	0	0	0	0	0	0	0	0	0	0	0	0
MAG284	d__Bacteria;p__Bacillota;c__Bacilli;o__Lactobacillales;f__Enterococcaceae;g__Enterococcus_B;s__Enterococcus_B faecium	Sichuan、Jiangsu	1.71735	0	0	0	0	0	0	0	0	0	0	0	0	0	0	0	0	0	0.0375841	0	0	0	0	0	0	0	0	0	0	0	0	0	0	0	0	0	0	0	0	0	0	0	0	0	0	0	0
MAG285	d__Bacteria;p__Actinomycetota;c__Thermoleophilia;o__Solirubrobacterales;f__Thermoleophilaceae;g__JAAYBF01;s__Unclassified	Yunnan	0	0	0	0	0	0	0	0	0	0	0	0	0	0	0	0	0	0	0	0	0	0	0	0	0	0	0	0	0	0	0	0	0	0	0	0	0	0	0	0	0	0	0	0	0	0	0
MAG286	d__Bacteria;p__Patescibacteria;c__Saccharimonadia;o__Saccharimonadales;f__2-12-FULL-41-12;g__Unclassified;s__Unclassified	Jiangsu	0	0	0	0	0	0	0	0	0	0	0	0	0	0	0	0	0	0	0	0	0	0	0	0	0	0	0	0	0	0	0	0	0	0	0	0	0	0	0	0	0	0	0	0	0	0	0
MAG287	d__Bacteria;p__Actinomycetota;c__Thermoleophilia;o__Solirubrobacterales;f__70-9;g__VAYN01;s__Unclassified	Jiangsu	0	0	0	0	0	0	0	0	0	0	0	0	0	0	0	0	0	0	0	0	0	0	0	0	0	0	0	0	0	0	0	0	0	0	0	0	0	0	0	0	0	0	0	0	0	0	0
MAG288	d__Bacteria;p__Bacteroidota;c__Bacteroidia;o__Sphingobacteriales;f__Sphingobacteriaceae;g__Sphingobacterium;s__Sphingobacterium alimentarium	Sichuan	0	0	0.0364781	0	0	0	0	0	0	0	0	0	0	10.8519	0	0	0	0	0	0	0	0	0.693334	0	0	0	0	0	0	0	0	0	0	0	0	0	0	0	0	0	0	0	0	0	0	0	0
MAG289	d__Bacteria;p__Pseudomonadota;c__Gammaproteobacteria;o__Xanthomonadales;f__Rhodanobacteraceae;g__Tahibacter;s__Unclassified	Sichuan	0	0	0	0	0	0	0	2.66701	0	0	0	0	0	0	0	0	0	0	0	0	0	0	0	0	0	0	0	0	0	0	0	0	0	0	0	0	0	0	0	0	0	0	0	0	0	0	0
MAG29	d__Bacteria;p__Actinomycetota;c__Actinomycetia;o__Propionibacteriales;f__Propionibacteriaceae;g__Brevilactibacter;s__Unclassified	Guizhou、Jiangsu	0	0	0	0	0	0	0	0	0	0	0	0	0	0	0	0	0	0	0	0	0	0	0	0	0	0	0	0	0	0	0.424301	0	0	0	0	0	0	0.200288	0	0	0.197189	0	0	0	0	0	0
MAG290	d__Bacteria;p__Actinomycetota;c__Actinomycetia;o__Actinomycetales;f__Dermatophilaceae;g__Lapillicoccus;s__Unclassified	Guizhou、Yunnan、Jiangsu	0	0	0	0	0	0	0	0	0	0	0	0	0	0	0	0	0	0	0	0	0	0	0	0	0	0.508912	0.301692	0.270806	0.661647	0.454161	0.260833	1.58428	0.411913	0.571547	0.411272	0.746265	0.237543	0	0.959142	0.472093	0.513132	1.51361	3.13971	0.259361	0.131086	0.683317	0.0692534
MAG291	d__Bacteria;p__Pseudomonadota;c__Gammaproteobacteria;o__Pseudomonadales;f__Cellvibrionaceae;g__Cellvibrio;s__Unclassified	Sichuan、Guizhou、Jiangsu	0	0	0	0	0	0	0	0.150085	0	0	0.770325	0	0	0	0.133149	0	2.13357	0	0	0	0	0.0898887	0	0	0	0	0	0	0	0	0	0	0	0	0	0	0	0	0	0	0.516624	0	0	0	0	0	0
MAG292	d__Bacteria;p__Pseudomonadota;c__Alphaproteobacteria;o__Rhodobacterales;f__Rhodobacteraceae;g__Paracoccus;s__Paracoccus sp021491915	Sichuan、Guizhou、Yunnan、Jiangsu	0.141628	0	0	0.102113	0.268099	0	0.158392	1.08135	0.490222	0.208874	3.57429	0	0	0	1.56418	0.129898	1.03886	0	0.226181	0.0971047	0	0.0712122	0.135261	0	0.62138	0.395957	0.760305	0.381137	0	0.168048	0.503558	0.199107	0	0	0	0	0	0.777786	0	0.553426	0.86024	0.456245	0.266447	0	0	0	0.118793
MAG293	d__Bacteria;p__Actinomycetota;c__Thermoleophilia;o__Solirubrobacterales;f__70-9;g__RHKX01;s__Unclassified	Sichuan、Guizhou、Jiangsu	0	0	0	0	0	0	0	0	0	0.166077	0	0	0	0	0	0	0	0	0	0.18844	0	0	0	0	0	0	0	0	0	0	0	0	0.0995896	0	0	0	0	0	0	0	0	0.0906083	0	0	0	0	0
MAG294	d__Bacteria;p__Actinomycetota;c__Actinomycetia;o__Actinomycetales;f__Dermatophilaceae;g__F2B08;s__Unclassified	Sichuan、Guizhou、Jiangsu	0.0317263	0	0	0	0	0	0	0	0	0	0	0	0	0	0	0	0	0	0.187403	0	0	0	0.0594364	0	0	0	0	0	0	0	0	0	0	0	0	0	0	0.632235	0	0	0	0	0	0	0	0	0
MAG295	d__Archaea;p__Thermoproteota;c__Nitrososphaeria;o__Nitrososphaerales;f__Nitrososphaeraceae;g__Nitrosocosmicus;s__Nitrosocosmicus oleophilus	Sichuan、Guizhou、Yunnan、Jiangsu	0	0.0570479	0	0.0587176	0.415018	0.0358448	0.190309	0	0.682239	0.519053	0	0.269344	0	0	0.0884155	0.552945	0	0	0	0.522931	0	0.299217	0	0	0.1032	0.352353	0.197448	0.505993	0.822903	0.718469	0.765455	0.196176	0.163367	0.486546	0.712621	0.756474	0.419781	0.277335	0.829517	1.0486	1.31884	0.479913	0.282109	0.473301	0.547192	0.449917	0.158569
MAG296	d__Bacteria;p__Actinomycetota;c__Actinomycetia;o__Actinomycetales;f__Dermatophilaceae;g__Ornithinibacter;s__Ornithinibacter sp017989115	Sichuan、Jiangsu	0.440736	0	0	0.400859	0	0.0743462	0	0.613167	0.280185	0	0	0	0	0	0	0	0	0	3.25807	0	0	0.0946224	0.177503	0	0	0	0	0	0	0	0	0	0	0	0	0	0	0	0	0	0	0	0	0	0	0	0
MAG297	d__Bacteria;p__Acidobacteriota;c__Thermoanaerobaculia;o__UBA5704;f__UBA5704;g__UBA5704;s__Unclassified	Guizhou、Jiangsu	0	0	0	0	0	0	0	0	0	0	0	0	0	0	0	0	0	0	0	0	0	0	0	0	0	0	0	0	0	0	0	0	0	0	0	0	0	0	0	7.6522	0	0	0	0	0	0	0
MAG298	d__Bacteria;p__Pseudomonadota;c__Alphaproteobacteria;o__Rhizobiales;f__Beijerinckiaceae;g__Unclassified;s__Unclassified	Sichuan、Guizhou、Yunnan、Jiangsu	0	0	0	0	0	0	0	0.119076	0	0	0.261923	0	0	0	0.0527158	0	0.15149	0	0	0	0	0	0	0	0	0	0	0.349643	0	0.490399	0.237353	0	0	0	0	0	0.070751	1.22981	0	0.143679	0.267215	0	0	0.161838	0	0	0.221082
MAG299	d__Bacteria;p__Verrucomicrobiota;c__Verrucomicrobiae;o__Chthoniobacterales;f__UBA10450;g__CADDYX01;s__Unclassified	Yunnan	0	0	0	0	0	0	0	0	0	0	0	0	0	0	0	0	0	0	0	0	0	0	0	0	0	0	0	0	0	0	0	0	0	0	0	0	0	0	0	0	0	0	0	0	0	0	0
MAG3	d__Bacteria;p__Pseudomonadota;c__Alphaproteobacteria;o__Sphingomonadales;f__Sphingomonadaceae;g__Allosphingosinicella;s__Unclassified	Yunnan	0	0	0	0	0	0	0	0	0	0	0	0	0	0	0	0	0	0	0	0	0	0	0	0	0	0	0	0	0	0	0	0	0	0	0	0	0	0	0	0	0	0	0	0	0	0	0
MAG30	d__Bacteria;p__Actinomycetota;c__Actinomycetia;o__Mycobacteriales;f__Mycobacteriaceae;g__Corynebacterium;s__Unclassified	Sichuan、Yunnan	0	0	0	0	0	0	0	0.0682579	0	0	0	0	0.0438975	0.131575	0.0909756	0	0	0.530868	0	0	2.5195	0	0.0706141	0.172013	0	0	0	0	0	0	0	0	0	0	0	0	0	0	0	0	0	0	0	0	0	0	0
MAG300	d__Bacteria;p__Actinomycetota;c__Actinomycetia;o__Mycobacteriales;f__Jatrophihabitantaceae;g__Jatrophihabitans_A;s__Unclassified	Yunnan	0	0	0	0	0	0	0	0	0	0	0	0	0	0	0	0	0	0	0	0	0	0	0	0	0	0	0	0	0	0	0	0	0	0	0	0	0	0	0	0	0	0	0	0	0	0	0
MAG301	d__Bacteria;p__Actinomycetota;c__Thermoleophilia;o__Solirubrobacterales;f__70-9;g__Unclassified;s__Unclassified	Yunnan	0	0	0	0	0	0	0	0	0	0	0	0	0	0	0	0	0	0	0	0	0	0	0	0	0	0	0	0	0	0	0	0	0	0	0	0	0	0	0	0	0	0	0	0	0	0	0
MAG302	d__Bacteria;p__Acidobacteriota;c__Blastocatellia;o__Pyrinomonadales;f__Pyrinomonadaceae;g__JAFDVJ01;s__Unclassified	Yunnan	0	0	0	0	0	0	0	0	0	0	0	0	0	0	0	0	0	0	0	0	0	0	0	0	0	0	0	0	0	0	0	0	0	0	0	0	0	0	0	0	0	0	0	0	0	0	0
MAG303	d__Bacteria;p__Actinomycetota;c__Actinomycetia;o__Actinomycetales;f__Micrococcaceae;g__Kocuria;s__Kocuria rosea	Sichuan、Guizhou、Jiangsu	0.0116199	0	0	0	0.0731279	0	0	0.0888005	0	0	0.724546	0	0	0	0.414204	0	0.837962	0	0	0	0	0	0	0	0	0.187652	0.489598	0.139695	0	0	0.310242	0	0	0	0	0	0	0.686542	0	0.343625	0.565944	0	0	0	0	0	0.0618877
MAG304	d__Bacteria;p__Dormibacterota;c__Dormibacteria;o__CF-121;f__CF-121;g__CF-13;s__Unclassified	Yunnan	0	0	0	0	0	0	0	0	0	0	0	0	0	0	0	0	0	0	0	0	0	0	0	0	0	0	0	0	0	0	0	0	0	0	0	0	0	0	0	0	0	0	0	0	0	0	0
MAG305	d__Bacteria;p__Actinomycetota;c__Actinomycetia;o__Actinomycetales;f__Dermatophilaceae;g__Phycicoccus;s__Phycicoccus sp001428065	Sichuan、Jiangsu	0	0	0	0.127154	0	0.0401687	0	0	0	0	0	0	0	0	0	0	0	0	0	0	0	0	0	0	0	0	0	0	0	0	0	0	0	0	0	0	0	0	0	0	0	0	0	0	0	0	0
MAG306	d__Bacteria;p__Pseudomonadota;c__Gammaproteobacteria;o__Burkholderiales;f__Burkholderiaceae_C;g__Paenalcaligenes;s__Unclassified	Sichuan	0	0	0.00747976	0	0	0	0	0	0	0	0	0	0.366043	0	0.0492943	0	0	0.0392302	0	0	0.0715756	0	0	0.417562	0.505546	0	0	0	0	0	0	0	0	0	0	0	0	0	0	0	0	0	0	0	0	0	0
MAG307	d__Bacteria;p__Bacteroidota;c__Bacteroidia;o__Sphingobacteriales;f__Sphingobacteriaceae;g__Sphingobacterium;s__Sphingobacterium sp020687765	Sichuan	0	0	0.373053	0	0	0	0	0	0	0.113148	0	0	0.0261882	0.700158	0	0	0	0.0102293	0	0	0.0334266	0	0.0194411	0.606556	0.138528	0	0	0	0	0	0	0	0	0	0	0	0	0	0	0	0	0	0	0	0	0	0
MAG308	d__Bacteria;p__Pseudomonadota;c__Gammaproteobacteria;o__Burkholderiales;f__Burkholderiaceae_C;g__Paenalcaligenes;s__Unclassified	Sichuan	0	0	0	0	0	0	0	0	0	0	0	0	0.80306	0	0.0530028	0	0	0.118617	0	0	0.184793	0	0	0.102227	0	0	0	0	0	0	0	0	0	0	0	0	0	0	0	0	0	0	0	0	0	0	0
MAG309	d__Bacteria;p__Cyanobacteriota;c__Cyanobacteriia;o__Cyanobacteriales;f__Microcoleaceae;g__Microcoleus;s__Unclassified	Guizhou、Yunnan、Jiangsu	0	0	0	0	0	0	0	0	0	0	0	0	0	0	0	0	0	0	0	0	0	0	0	0	0	0	0	1.03585	0	0.135523	0.695544	0.250339	0.3126	0	0	0.324684	0.149712	1.17002	0.431303	0	0.188934	0.197519	0.227138	0.13332	0	1.42932	1.98591
MAG31	d__Bacteria;p__Actinomycetota;c__Actinomycetia;o__Actinomycetales;f__Microbacteriaceae;g__Agrococcus;s__Agrococcus casei	Sichuan	0	0	0.212539	0	0	0	0	0	0	0	0	0	0	0	0.047625	0	0	0.016964	0	0	0.0532914	0	0.0249137	0.150412	0	0	0	0	0	0	0	0	0	0	0	0	0	0	0	0	0	0	0	0	0	0	0
MAG310	d__Bacteria;p__Nitrospirota;c__Nitrospiria;o__Nitrospirales;f__Nitrospiraceae;g__Nitrospira_F;s__Unclassified	Sichuan、Guizhou、Jiangsu	0	0.0929934	0	0.7274	0.194656	0.523436	1.29582	0	0	0.412285	0	0	0	0	0	0.238388	0	0	0.0271178	0.187288	0	0	0	0	1.14123	0	0	0	0	0	0	0	0	0	0	0	0	0	0	0	0	0	0	0	0	0	0
MAG311	d__Bacteria;p__Pseudomonadota;c__Alphaproteobacteria;o__Rhodobacterales;f__Rhodobacteraceae;g__Paracoccus;s__Paracoccus sp021491915	Sichuan、Guizhou、Yunnan、Jiangsu	0.0969888	0	0	0.0693123	0.186425	0	0	0.72041	0.317144	0.15688	1.5167	0	0	0	1.02921	0.0957695	0.672898	0	0.15779	0.0674285	0	0.0463222	0.0865164	0	0.430916	0.322851	0.62574	0.353485	0	0.14777	0.417821	0.148809	0	0	0	0	0	0.580461	0	0.459137	1.82078	0.376282	0.199081	0	0	0	0.101221
MAG312	d__Bacteria;p__Cyanobacteriota;c__Cyanobacteriia;o__Cyanobacteriales;f__PCC-6304;g__Unclassified;s__Unclassified	Guizhou、Jiangsu	0	0	0	0	0	0	0	0	0	0	0	0	0	0	0	0	0	0	0	0	0	0	0	0	0	0	0	0	0	0	0	0	0	0	0	0	0	0	0	0	0	0	0	0	0	0	0
MAG313	d__Bacteria;p__Bacillota_A;c__Clostridia;o__Tissierellales;f__Tissierellaceae_A;g__Unclassified;s__Unclassified	Sichuan	0	0	0	0	0	0	0	0	0	0	0	0	0	0	0	0	0	0	0	0	0	0	1.1449	0	0	0	0	0	0	0	0	0	0	0	0	0	0	0	0	0	0	0	0	0	0	0	0
MAG314	d__Bacteria;p__Actinomycetota;c__Actinomycetia;o__Propionibacteriales;f__Nocardioidaceae;g__Nocardioides;s__Unclassified	Sichuan、Guizhou、Yunnan、Jiangsu	0.0234325	0.768795	0	0.279426	2.12908	0.0789305	2.13415	0.360471	1.14148	1.21371	1.65913	0.173487	0	0	0.519274	1.21718	0.193291	0	0.116383	0.904317	0	0.284102	0	0	0.738993	4.88046	3.79299	0.609204	1.85416	0.560007	1.68933	0.392333	0.678044	0.380786	4.56321	4.33718	0.410226	0.486739	4.85258	3.42715	2.88952	0.767633	0.797602	0.449224	0.299079	1.04363	0.342381
MAG315	d__Bacteria;p__Actinomycetota;c__Actinomycetia;o__Actinomycetales;f__Dermabacteraceae;g__Brachybacterium;s__Brachybacterium rhamnosum	Jiangsu	0	0	0	0	0	0	0	0	0	0	0	0	0	0	0	0	0	0	0	0	0	0	0	0	0	0	0	0	0	0	0	0	0	0	0	0	0	0	0	0	0	0	0	0	0	0	0
MAG316	d__Bacteria;p__Actinomycetota;c__Actinomycetia;o__Actinomycetales;f__Dermatophilaceae;g__Ornithinimicrobium;s__Unclassified	Guizhou、Jiangsu	0	0	0	0	0	0	0	0	0	0	0	0	0	0	0	0	0	0	0	0	0	0	0	0	0	0	0	0	0	0	0	0	0	0	0	0	0	0.660705	0	0	0	0	0	0	0	0	0
MAG317	d__Bacteria;p__Bacillota;c__Bacilli;o__Lactobacillales;f__Lactobacillaceae;g__Ligilactobacillus;s__Ligilactobacillus ruminis	Yunnan	0	0	0	0	0	0	0	0	0	0	0	0	0	0	0	0	0	0	0	0	0	0	0	0	0	0	0	0	0	0	0	0	0	0	0	0	0	0	0	0	0	0	0	0	0	0	0
MAG318	d__Bacteria;p__Patescibacteria;c__Saccharimonadia;o__Saccharimonadales;f__UBA4665;g__Unclassified;s__Unclassified	Yunnan	0	0	0	0	0	0	0	0	0	0	0	0	0	0	0	0	0	0	0	0	0	0	0	0	0	0	0	0	0	0	0	0	0	0	0	0	0	0	0	0	0	0	0	0	0	0	0
MAG319	d__Bacteria;p__Actinomycetota;c__Acidimicrobiia;o__Acidimicrobiales;f__Ilumatobacteraceae;g__JACCUL01;s__Unclassified	Jiangsu	0	0	0	0	0	0	0	0	0	0	0	0	0	0	0	0	0	0	0	0	0	0	0	0	0	0	0	0	0	0	0	0	0	0	0	0	0	0	0	0	0	0	0	0	0	0	0
MAG32	d__Bacteria;p__Bacteroidota;c__Bacteroidia;o__Chitinophagales;f__Chitinophagaceae;g__JAEWAC01;s__Unclassified	Sichuan	0	0	0	0	0	0	0	0	0	0	0	0	0	0	0.353985	0	2.73679	0	0	0	0	0	0	0	0	0	0	0	0	0	0	0	0	0	0	0	0	0	0	0	0	0	0	0	0	0	0
MAG320	d__Bacteria;p__Acidobacteriota;c__Blastocatellia;o__Pyrinomonadales;f__Pyrinomonadaceae;g__Unclassified;s__Unclassified	Yunnan	0	0	0	0	0	0	0	0	0	0	0	0	0	0	0	0	0	0	0	0	0	0	0	0	0	0	0	0	0	0	0	0	0	0	0	0	0	0	0	0	0	0	0	0	0	0	0
MAG321	d__Bacteria;p__Bacillota;c__Bacilli;o__Bacillales_D;f__Amphibacillaceae;g__Virgibacillus_I;s__Unclassified	Sichuan	0	0	0	0	0.0802612	0	0	0	0	0	0	0	0.185451	0	0.121956	0.0609357	0	0.160801	0	0	0.282959	0	0	1.89131	0.140853	0	0	0	0	0	0	0	0	0	0	0	0	0	0	0	0	0	0	0	0	0	0
MAG322	d__Bacteria;p__Pseudomonadota;c__Alphaproteobacteria;o__Rhodobacterales;f__Rhodobacteraceae;g__Paracoccus;s__Paracoccus sp021491915	Sichuan、Guizhou、Yunnan、Jiangsu	0.0794195	0	0	0	0.151268	0	0	0.641394	0.291964	0.117112	1.42076	0	0	0	0.929893	0.0754579	0.64594	0	0.121416	0	0	0	0.073835	0	0.394174	0.275825	0.553119	0.224639	0	0.0971634	0.356435	0.109984	0	0	0	0	0	0.532262	0	0.370675	0.619635	0.253798	0.152972	0	0	0	0.0655296
MAG323	d__Bacteria;p__Actinomycetota;c__Actinomycetia;o__Actinomycetales;f__JAHECE01;g__JAHECE01;s__Unclassified	Jiangsu	0	0	0	0	0	0	0	0	0	0	0	0	0	0	0	0	0	0	0	0	0	0	0	0	0	0	0	0	0	0	0	0	0	0	0	0	0	0	0	0	0	0	0	0	0	0	0
MAG324	d__Bacteria;p__Pseudomonadota;c__Gammaproteobacteria;o__Pseudomonadales;f__Cellvibrionaceae;g__Cellvibrio;s__Unclassified	Sichuan	0	0	0.0392056	0	0	0	0	0	0	0	0	0	0	0.998	0	0	0	0	0	0	0	0	0.0372739	0	0	0	0	0	0	0	0	0	0	0	0	0	0	0	0	0	0	0	0	0	0	0	0
MAG325	d__Bacteria;p__Bacillota;c__Bacilli;o__Bacillales;f__Planococcaceae;g__Sporosarcina;s__Unclassified	Sichuan	0	0	0	0	0	0	0	0	0	0	0	0	0.190589	0	0	0	0	0.568218	0	0	0.323864	0	0	0.054982	0	0	0	0	0	0	0	0	0	0	0	0	0	0	0	0	0	0	0	0	0	0	0
MAG326	d__Bacteria;p__Eremiobacterota;c__Eremiobacteria;o__Baltobacterales;f__Baltobacteraceae;g__Unclassified;s__Unclassified	Yunnan	0	0	0	0	0	0	0	0	0	0	0	0	0	0	0	0	0	0	0	0	0	0	0	0	0	0	0	0	0	0	0	0	0	0	0	0	0	0	0	0	0	0	0	0	0	0	0
MAG327	d__Archaea;p__Methanobacteriota;c__Methanobacteria;o__Methanobacteriales;f__Methanobacteriaceae;g__Methanosphaera;s__Methanosphaera sp022768985	Yunnan	0	0	0	0	0	0	0	0	0	0	0	0	0	0	0	0	0	0	0	0	0	0	0	0	0	0	0	0	0	0	0	0	0	0	0	0	0	0	0	0	0	0	0	0	0	0	0
MAG328	d__Bacteria;p__Bacillota;c__Bacilli;o__Staphylococcales;f__Salinicoccaceae;g__Jeotgalicoccus;s__Jeotgalicoccus nanhaiensis	Sichuan、Yunnan	0.0181561	0	0.241713	0	0	0	0	0.136358	0	0	0	0	0.0224004	1.84248	0.0773522	0	0	0.235421	0	0	0.3808	0	0.0921337	0.144746	0.142297	0	0	0	0	0	0	0	0	0	0	0	0	0	0	0	0	0	0	0	0	0	0
MAG329	d__Bacteria;p__Bacillota;c__Bacilli;o__Lactobacillales;f__Enterococcaceae;g__Enterococcus_I;s__Unclassified	Sichuan、Yunnan	0	0	0	0	0	0	0	0	0	0	0	0	0.634351	0	0	0	0	0.59277	0	0	0.626589	0	0	0.213263	0	0	0	0	0	0	0	0	0	0	0	0	0	0	0	0	0	0	0	0	0	0	0
MAG33	d__Bacteria;p__Pseudomonadota;c__Alphaproteobacteria;o__Sphingomonadales;f__Sphingomonadaceae;g__Sphingomicrobium;s__Unclassified	Guizhou、Yunnan	0	0	0	0	0	0	0	0	0	0	0	0	0	0	0	0	0	0	0	0	0	0	0	0	0	0	0	0	0.791589	0	0	0	0	1.56007	0	0.849278	0	0	0.491332	0	0	0	0	0	0	0	0
MAG330	d__Bacteria;p__Bacillota;c__Bacilli;o__Lactobacillales;f__Carnobacteriaceae;g__Desemzia;s__Unclassified	Sichuan、Yunnan	0	0	0.02856	0	0	0	0	0	0	0	0	0	0.0178662	0	0.244995	0	0	0.55064	0	0	0.103203	0	0.0367251	3.07876	0.0808069	0	0	0	0	0	0	0	0	0	0	0	0	0	0	0	0	0	0	0	0	0	0
MAG331	d__Bacteria;p__Bacteroidota;c__Bacteroidia;o__Flavobacteriales;f__Weeksellaceae;g__Kaistella;s__Unclassified	Sichuan	0	0	0	0	0	0	0	0	0	0	0	0	0	0.0245742	0	0	0	0	0	0	0	0	1.05397	0	0	0	0	0	0	0	0	0	0	0	0	0	0	0	0	0	0	0	0	0	0	0	0
MAG332	d__Bacteria;p__Pseudomonadota;c__Alphaproteobacteria;o__Rhodobacterales;f__Rhodobacteraceae;g__Paracoccus;s__Paracoccus sp021491915	Sichuan、Guizhou、Yunnan、Jiangsu	0.12141	0.0557217	0	0.0906598	0.354386	0	0.166475	0.959269	0.459658	0.223866	2.22873	0	0	0	1.2284	0.175667	0.773305	0	0.191226	0.100321	0	0.0617189	0.0906134	0	0.641399	0.612251	1.18693	0.736329	0	0.322555	0.626272	0.240314	0	0	0.157358	0	0	0.991221	0	0.740048	1.10886	0.584931	0.34046	0	0	0	0.186317
MAG333	d__Bacteria;p__Bacteroidota;c__Bacteroidia;o__Chitinophagales;f__Chitinophagaceae;g__Ferruginibacter;s__Unclassified	Guizhou	0	0	0	0	0	0	0	0	0	0	0	0	0	0	0	0	0	0	0	0	0	0	0	0	0	0	0	4.04199	0	2.51706	0.107011	0	0	0	0	0	0.146619	0	0	0.12278	0	0	0	0.244636	0.111399	0	1.57544
MAG334	d__Bacteria;p__Patescibacteria;c__Saccharimonadia;o__Saccharimonadales;f__UBA1547;g__JAEWBQ01;s__Unclassified	Yunnan	0	0	0	0	0	0	0	0	0	0	0	0	0	0	0	0	0	0	0	0	0	0	0	0	0	0	0	0	0	0	0	0	0	0	0	0	0	0	0	0	0	0	0	0	0	0	0
MAG335	d__Bacteria;p__Pseudomonadota;c__Gammaproteobacteria;o__Burkholderiales;f__SG8-39;g__SCGC-AG-212-J23;s__Unclassified	Guizhou、Jiangsu	0	0	0	0	0	0	0	0	0	0	0	0	0	0	0	0	0	0	0	0	0	0	0	0	0	0	0	0.137719	0	0.277127	0.156614	0	2.49093	0	0.14537	0	1.65316	0	0	0	0	0	0	2.74868	2.22983	0.101019	0.0534316
MAG336	d__Bacteria;p__Acidobacteriota;c__Vicinamibacteria;o__Vicinamibacterales;f__UBA2999;g__JACCSI01;s__Unclassified	Guizhou、Jiangsu	0	0	0	0	0	0	0	0	0	0	0	0	0	0	0	0	0	0	0	0	0	0	0	0	0	0	0	0	0	0	0	0	0	0	0	0	0	0	0	0	0	0	0	0	0	0	0.176743
MAG337	d__Bacteria;p__Bacteroidota;c__Bacteroidia;o__Sphingobacteriales;f__Sphingobacteriaceae;g__Sphingobacterium;s__Sphingobacterium sp020687765	Sichuan	0	0	0.243544	0	0	0	0	0	0	0.151342	0	0	0.0261931	0.949866	0.0565671	0	0	0.0121236	0	0	0.038006	0	0.0106571	0.961049	0.180375	0	0	0	0	0	0	0	0	0	0	0	0	0	0	0	0	0	0	0	0	0	0
MAG338	d__Bacteria;p__Verrucomicrobiota;c__Verrucomicrobiae;o__Verrucomicrobiales;f__Akkermansiaceae;g__Luteolibacter;s__Unclassified	Jiangsu	0	0	0	0	0	0	0	0	0	0	0	0	0	0	0	0	0	0	0	0	0	0	0	0	0	0	0	0	0	0	0	0	0	0	0	0	0	0	0	0	0	0	0	0	0	0	0
MAG339	d__Bacteria;p__Nitrospirota;c__Nitrospiria;o__Nitrospirales;f__Nitrospiraceae;g__Nitrospira_C;s__Unclassified	Guizhou、Jiangsu	0	0	0	0	0	0	0	0	0	0	0	0	0	0	0	0	0	0	0	0	0	0	0	0	0	0.187466	0	0.585924	0	1.64678	0.37366	0	0.579178	0	0.382154	0	0.451097	0.337165	0	0.208532	0.411861	0	0	1.35299	0.93034	0	1.551
MAG34	d__Bacteria;p__Actinomycetota;c__Thermoleophilia;o__Solirubrobacterales;f__70-9;g__VAYN01;s__Unclassified	Jiangsu	0	0	0	0	0	0	0	0	0	0	0	0	0	0	0	0	0	0	0	0	0	0	0	0	0	0	0	0	0	0	0	0	0	0	0	0	0	0	0	0	0	0	0	0	0	0	0
MAG340	d__Bacteria;p__Pseudomonadota;c__Alphaproteobacteria;o__Sphingomonadales;f__Sphingomonadaceae;g__Sphingomicrobium;s__Unclassified	Guizhou、Yunnan	0	0	0	0	0	0	0	0	0	0	0	0	0	0	0	0	0	0	0	0	0	0	0	0	0	0	0	0	0.739454	0	0	0	0	1.5094	0	0.821543	0	0	0.486945	0	0	0	0	0	0	0	0
MAG341	d__Bacteria;p__Myxococcota;c__Myxococcia;o__Myxococcales;f__40CM-4-68-19;g__40CM-4-68-19;s__Unclassified	Yunnan	0	0	0	0	0	0	0	0	0	0	0	0	0	0	0	0	0	0	0	0	0	0	0	0	0	0	0	0	0	0	0	0	0	0	0	0	0	0	0	0	0	0	0	0	0	0	0
MAG342	d__Archaea;p__Thermoproteota;c__Nitrososphaeria;o__Nitrososphaerales;f__Nitrososphaeraceae;g__Nitrosocosmicus;s__Unclassified	Sichuan、Guizhou、Jiangsu	0	0	0	0	0	0	0	0	0	0	0	0.0763826	0	0	0	0	0	0	0	0	0	0	0	0	0	0.243311	0.141952	0.721383	0	0.651038	0.347867	0.111008	0.233814	0	0.369793	0.424767	0.307463	1.10581	0.445605	0.420198	0.251825	0.132487	0.125945	0.384616	0.382888	0.352496	1.73417
MAG343	d__Bacteria;p__Pseudomonadota;c__Gammaproteobacteria;o__Pseudomonadales;f__Pseudomonadaceae;g__Thiopseudomonas;s__Unclassified	Sichuan、Yunnan	0	0	0	0	0	0	0	0	0	0	0	0	0.47238	0	0	0	0	2.74114	0	0	2.69557	0	0	0.0513301	0	0	0	0	0	0	0	0	0	0	0	0	0	0	0	0	0	0	0	0	0	0	0
MAG344	d__Bacteria;p__Actinomycetota;c__Actinomycetia;o__Actinomycetales;f__Dermatophilaceae;g__F2B08;s__Unclassified	Sichuan、Guizhou、Jiangsu	0.0321618	0	0	0	0	0	0	0	0	0	0	0	0	0	0	0	0	0	0.192313	0	0	0	0.0688693	0	0	0	0	0	0	0	0	0	0	0	0	0	0	0.700532	0	0	0	0	0	0	0	0	0
MAG345	d__Bacteria;p__Bacteroidota;c__Bacteroidia;o__Flavobacteriales;f__Flavobacteriaceae;g__Flavobacterium;s__Unclassified	Sichuan	0	0	0	0	0	0	0	4.65221	0.132096	0	0	0	0	0	0	0	0	0	0	0	0	0	0	0	0	0	0	0	0	0	0	0	0	0	0	0	0	0	0	0	0	0	0	0	0	0	0
MAG346	d__Bacteria;p__Gemmatimonadota;c__Gemmatimonadetes;o__Gemmatimonadales;f__Gemmatimonadaceae;g__JABFXC01;s__Unclassified	Yunnan	0	0	0	0	0	0	0	0	0	0	0	0	0	0	0	0	0	0	0	0	0	0	0	0	0	0	0	0	0	0	0	0	0	0	0	0	0	0	0	0	0	0	0	0	0	0	0
MAG347	d__Archaea;p__Thermoproteota;c__Nitrososphaeria;o__Nitrososphaerales;f__Nitrososphaeraceae;g__Nitrososphaera;s__Unclassified	Guizhou、Jiangsu	0	0	0	0	0	0	0	0	0	0	0	0	0	0	0	0	0	0	0	0	0	0	0	0	0	0	0	0.271002	0	0.164433	0	0	0.236277	0	0	0	0.112864	0	0	0	0	0	0	0.262447	0.251565	0	0.12347
MAG348	d__Bacteria;p__Bacteroidota;c__Bacteroidia;o__Chitinophagales;f__Chitinophagaceae;g__Segetibacter;s__Unclassified	Yunnan	0	0	0	0	0	0	0	0	0	0	0	0	0	0	0	0	0	0	0	0	0	0	0	0	0	0	0	0	0	0	0	0	0	0	0	0	0	0	0	0	0	0	0	0	0	0	0
MAG349	d__Bacteria;p__Actinomycetota;c__Actinomycetia;o__Actinomycetales;f__Microbacteriaceae;g__Curtobacterium;s__Curtobacterium sp002412165	Jiangsu	0	0	0	0	0	0	0	0	0	0	0	0	0	0	0	0	0	0	0	0	0	0	0	0	0	0	0	0	0	0	0	0	0	0	0	0	0	0	0	0	0	0	0	0	0	0	0
MAG35	d__Bacteria;p__Pseudomonadota;c__Gammaproteobacteria;o__Burkholderiales;f__SG8-39;g__SCGC-AG-212-J23;s__Unclassified	Guizhou、Jiangsu	0	0	0	0	0	0	0	0	0	0	0	0	0	0	0	0	0	0	0	0	0	0	0	0	0	0	0	0	0	0.210174	0.165971	0	3.29182	0	0	0	1.92209	0	0	0	0	0	0	1.80578	2.36513	0	0.0504291
MAG350	d__Bacteria;p__Chloroflexota;c__Limnocylindria;o__QHBO01;f__Unclassified;g__Unclassified;s__Unclassified	Guizhou、Yunnan、Jiangsu	0	0	0	0	0	0	0	0	0	0	0	0	0	0	0	0	0	0	0	0	0	0	0	0	0	0	0	0	0	0	0	0	0	0	0	0	0	0.557122	0	0	0	0	0	0	0	0	0
MAG351	d__Bacteria;p__Acidobacteriota;c__Terriglobia;o__Bryobacterales;f__Bryobacteraceae;g__Bog-105;s__Unclassified	Jiangsu	0	0	0	0	0	0	0	0	0	0	0	0	0	0	0	0	0	0	0	0	0	0	0	0	0	0	0	0	0	0	0	0	0	0	0	0	0	0	0	0	0	0	0	0	0	0	0
MAG352	d__Bacteria;p__Actinomycetota;c__Actinomycetia;o__Actinomycetales;f__Brevibacteriaceae;g__Brevibacterium;s__Brevibacterium intestinigallinarum	Sichuan	0	0	0.299505	0	0	0	0	0	0	0	0	0	0	0.30991	0.0469185	0	0	0.00670199	0	0	0.0382384	0	0.0305762	0.0125114	0	0	0	0	0	0	0	0	0	0	0	0	0	0	0	0	0	0	0	0	0	0	0
MAG353	d__Bacteria;p__Actinomycetota;c__Actinomycetia;o__Actinomycetales;f__Dermabacteraceae;g__Brachybacterium;s__Brachybacterium muris	Sichuan	0	0	0.358858	0	0	0	0	1.27945	0	0	0	0	0	0	0	0	0	0	0	0	0	0	0.127688	0	0	0	0	0	0	0	0	0	0	0	0	0	0	0	0	0	0	0	0	0	0	0	0
MAG354	d__Bacteria;p__Pseudomonadota;c__Gammaproteobacteria;o__Burkholderiales;f__Burkholderiaceae_B;g__Ramlibacter;s__Unclassified	Yunnan	0	0	0	0	0	0	0	0	0	0	0	0	0	0	0	0	0	0	0	0	0	0	0	0	0	0	0	0	0	0	0	0	0	0	0	0	0	0	0	0	0	0	0	0	0	0	0
MAG355	d__Bacteria;p__Actinomycetota;c__Actinomycetia;o__Actinomycetales;f__Microbacteriaceae;g__NC76-1;s__Unclassified	Sichuan	0	0	0	0	0	0	0	0	0	0	0	0	0.295334	0	0.0423849	0	0	0.0624118	0	0	0.144271	0	0	0.139937	0	0	0	0	0	0	0	0	0	0	0	0	0	0	0	0	0	0	0	0	0	0	0
MAG356	d__Bacteria;p__Pseudomonadota;c__Alphaproteobacteria;o__Rhizobiales;f__Xanthobacteraceae;g__Tardiphaga;s__Unclassified	Guizhou、Yunnan	0	0	0	0	0	0	0	0	0	0	0	0	0	0	0	0	0	0	0	0	0	0	0	0	0	0	0	0	0.308941	0	0	0	0	0.482145	0	0	0	0	0	0	0	0	0	0	0	0	0
MAG357	d__Bacteria;p__Patescibacteria;c__Saccharimonadia;o__Saccharimonadales;f__UBA4665;g__Unclassified;s__Unclassified	Yunnan	0	0	0	0	0	0	0	0	0	0	0	0	0	0	0	0	0	0	0	0	0	0	0	0	0	0	0	0	0	0	0	0	0	0	0	0	0	0	0	0	0	0	0	0	0	0	0
MAG358	d__Bacteria;p__Bacteroidota;c__Bacteroidia;o__Chitinophagales;f__Chitinophagaceae;g__Flavisolibacter;s__Unclassified	Guizhou、Jiangsu	0	0	0	0	0	0	0	0	0	0	0	0	0	0	0	0	0	0	0	0	0	0	0	0	0	0.514995	0.180225	3.01634	0	1.39846	0.178994	0.205924	0.178529	0	0.214584	0	0.14809	0	0	0.28844	0.55476	1.39031	0.494726	0.245566	0	0.762699	0.534379
MAG359	d__Bacteria;p__Acidobacteriota;c__Thermoanaerobaculia;o__UBA5704;f__UBA5704;g__UBA5704;s__Unclassified	Sichuan、Yunnan、Jiangsu	0	0	0	0	1.10682	0	1.08283	0	0	0	0	0	0	0	0.770088	0.966577	0	0	0	0	0	0	0	0	3.53412	0	0	0	0	0	0	0	0	0	0	0	0	0	0	0	0	0	0	0	0	0	0
MAG36	d__Bacteria;p__Chloroflexota;c__Ktedonobacteria;o__Ktedonobacterales;f__JADMIN01;g__JAKAIY01;s__Unclassified	Jiangsu	0	0	0	0	0	0	0	0	0	0	0	0	0	0	0	0	0	0	0	0	0	0	0	0	0	0	0	0	0	0	0	0	0	0	0	0	0	0	0	0	0	0	0	0	0	0	0
MAG360	d__Bacteria;p__Chloroflexota;c__Ktedonobacteria;o__Ktedonobacterales;f__JADMIN01;g__JAKAIY01;s__Unclassified	Jiangsu	0	0	0	0	0	0	0	0	0	0	0	0	0	0	0	0	0	0	0	0	0	0	0	0	0	0	0	0	0	0	0	0	0	0	0	0	0	0	0	0	0	0	0	0	0	0	0
MAG361	d__Archaea;p__Thermoproteota;c__Nitrososphaeria;o__Nitrososphaerales;f__Nitrososphaeraceae;g__Nitrosocosmicus;s__Unclassified	Yunnan、Jiangsu	0	0	0	0	0	0	0	0	0	0	0	0	0	0	0	0	0	0	0	0	0	0	0	0	0	0	0	0	0	0	0	0	0	0	0	0	0	0	0	0	0	0	0	0	0	0	0
MAG362	d__Bacteria;p__Bacillota;c__Bacilli;o__Lactobacillales;f__Streptococcaceae;g__Streptococcus;s__Streptococcus alactolyticus	Sichuan、Yunnan、Jiangsu	3.36405	0	0	0.134729	0	0	0	0	0	0	0	0	0	0	0	0	0	0	0.078009	0	0	0	0	0	0	0	0	0	0	0	0	0	0	0	0	0	0	0	0	0	0	0	0	0	0	0	0
MAG363	d__Bacteria;p__Pseudomonadota;c__Gammaproteobacteria;o__Pseudomonadales;f__Pseudomonadaceae;g__Thiopseudomonas;s__Thiopseudomonas sp012518175	Sichuan、Yunnan	0	0	0	0	0	0	0	0	0	0	0	0	4.234	0	0	0	0	0.81909	0	0	0.477051	0	0	0.323805	0	0	0	0	0	0	0	0	0	0	0	0	0	0	0	0	0	0	0	0	0	0	0
MAG364	d__Bacteria;p__Acidobacteriota;c__Blastocatellia;o__Pyrinomonadales;f__Pyrinomonadaceae;g__OLB17;s__Unclassified	Jiangsu	0	0	0	0	0	0	0	0	0	0	0	0	0	0	0	0	0	0	0	0	0	0	0	0	0	0	0	0	0	0	0	0	0	0	0	0	0	0	0	0	0	0	0	0	0	0	0
MAG365	d__Bacteria;p__Actinomycetota;c__Actinomycetia;o__Streptosporangiales;f__Streptosporangiaceae;g__Nocardiopsis;s__Unclassified	Sichuan	0	0	0.0167781	0	0.149463	0	0	0.173979	0	0	0	0	0.00682194	0.601716	0.263878	0.0893567	0	0.0351675	0	0	0.0405288	0.0955389	0	0.0505355	0.987329	0	0	0	0	0	0	0	0	0	0	0	0	0	0	0	0	0	0	0	0	0	0
MAG366	d__Bacteria;p__Patescibacteria;c__Saccharimonadia;o__Saccharimonadales;f__UBA4665;g__Unclassified;s__Unclassified	Yunnan	0	0	0	0	0	0	0	0	0	0	0	0	0	0	0	0	0	0	0	0	0	0	0	0	0	0	0	0	0	0	0	0	0	0	0	0	0	0	0	0	0	0	0	0	0	0	0
MAG367	d__Bacteria;p__Actinomycetota;c__Actinomycetia;o__Mycobacteriales;f__Mycobacteriaceae;g__Corynebacterium;s__Corynebacterium sp012837295	Sichuan、Yunnan	0.523294	0	2.30602	0.562677	0	0.0392954	0	0.332057	0	0	0	0	0.0122141	0.118984	0.0492327	0	0	0.024329	0.423967	0.0873195	0.0806427	0	0.781102	0.0064016	0	0	0	0	0	0	0	0	0	0	0	0	0	0	0	0	0	0	0	0	0	0	0
MAG368	d__Bacteria;p__Actinomycetota;c__Actinomycetia;o__Actinomycetales;f__Micrococcaceae;g__Arthrobacter_H;s__Arthrobacter_H sp016892645	Sichuan	0.204591	0	0	1.48812	0	1.94616	0.273876	0	0	0	0	0	0	0	0	0	0	0	0.0804803	0	0	0	0	0	0.200689	0	0	0	0	0	0	0	0	0	0	0	0	0	0	0	0	0	0	0	0	0	0
MAG369	d__Bacteria;p__Actinomycetota;c__Actinomycetia;o__Actinomycetales;f__Dermatophilaceae;g__Serinicoccus;s__Unclassified	Sichuan	0.0460646	0	0.00818916	0	0	0	0	0.0500465	0	0	0	0	0	1.05976	0.118016	0	0	0	0	0	0.0426281	0	0.036646	0	0	0	0	0	0	0	0	0	0	0	0	0	0	0	0	0	0	0	0	0	0	0	0
MAG37	d__Bacteria;p__Dormibacterota;c__Dormibacteria;o__CF-121;f__Unclassified;g__Unclassified;s__Unclassified	Yunnan	0	0	0	0	0	0	0	0	0	0	0	0	0	0	0	0	0	0	0	0	0	0	0	0	0	0	0	0	0	0	0	0	0	0	0	0	0	0	0	0	0	0	0	0	0	0	0
MAG370	d__Bacteria;p__Actinomycetota;c__Actinomycetia;o__Actinomycetales;f__Micrococcaceae;g__Kocuria;s__Unclassified	Jiangsu	0	0	0	0	0	0	0	0	0	0	0	0	0	0	0	0	0	0	0	0	0	0	0	0	0	0	0	0	0	0	0	0	0	0	0	0	0	0	0	0	0	0	0	0	0	0	0
MAG371	d__Bacteria;p__Pseudomonadota;c__Alphaproteobacteria;o__Sphingomonadales;f__Sphingomonadaceae;g__Allosphingosinicella;s__Unclassified	Yunnan	0	0	0	0	0	0	0	0	0	0	0	0	0	0	0	0	0	0	0	0	0	0	0	0	0	0	0	0	0	0	0	0	0	0	0	0	0	0	0	0	0	0	0	0	0	0	0
MAG372	d__Bacteria;p__Nitrospirota;c__Nitrospiria;o__Nitrospirales;f__Nitrospiraceae;g__Nitrospira_F;s__Unclassified	Sichuan、Guizhou	0	0	0	0	0	0	0	0	0	0.219715	0	0	0	0	0	0.0879918	0	0	0	0	0	0	0	0	0	3.00424	2.1584	0.254963	0	0	1.60972	0.959833	0	0	2.70948	0	0	0.282477	0	0.688816	0.216816	1.73787	2.1445	0	0	1.55676	0
MAG373	d__Bacteria;p__Actinomycetota;c__Thermoleophilia;o__Solirubrobacterales;f__70-9;g__RHKX01;s__Unclassified	Sichuan、Guizhou、Jiangsu	0	0	0	0	0	0	0	0	0	0.217336	0	0	0	0	0	0	0	0	0	0.236577	0	0	0	0	0	0	0	0	0	0	0	0	0.114247	0	0	0	0	0	0	0	0	0.10367	0	0.106606	0	0	0
MAG374	d__Bacteria;p__Actinomycetota;c__Actinomycetia;o__JAHEKZ01;f__JAHEKZ01;g__Unclassified;s__Unclassified	Sichuan	0	0.209649	0	0.332253	1.29153	0	0.208189	0	1.31152	1.55051	0	0.276691	0	0	0.0942541	1.12848	0	0	0.0427347	2.57213	0	0.360147	0	0	0.120534	0	0	0	0	0	0	0	0	0	0	0	0	0	0	0	0	0	0	0	0	0	0
MAG375	d__Bacteria;p__Actinomycetota;c__Thermoleophilia;o__Gaiellales;f__Gaiellaceae;g__GMQP-bins7;s__Unclassified	Guizhou、Yunnan、Jiangsu	0	0	0	0	0	0	0	0	0	0	0	0	0	0	0	0	0	0	0	0	0	0	0	0	0	0.73223	0.380427	0.690251	0	1.62216	0.751605	0.427368	1.84669	0	1.08324	0.349841	0.945755	0	0.377137	0.860205	0.518068	1.51659	1.5616	3.48697	2.28686	0.886427	1.2379
MAG376	d__Bacteria;p__Nitrospirota;c__Nitrospiria;o__Nitrospirales;f__Nitrospiraceae;g__Nitrospira_C;s__Unclassified	Guizhou、Jiangsu	0	0	0	0	0	0	0	0	0	0	0	0	0	0	0	0	0	0	0	0	0	0	0	0	0	0	0	0	0	0.190984	0.107911	0	0.233372	0	0	0	0.156962	0	0	0	0	0	0	0.223842	0.212449	0	0.173424
MAG377	d__Bacteria;p__Actinomycetota;c__Actinomycetia;o__Mycobacteriales;f__Mycobacteriaceae;g__Corynebacterium;s__Unclassified	Sichuan	0	0	0.713348	0	0.0597408	0	0	0.122962	0	0	0	0	0.0293985	2.74494	0.357749	0	0	0.0364511	0	0	0.0988057	0	0.0952474	0.0490353	0.109963	0	0	0	0	0	0	0	0	0	0	0	0	0	0	0	0	0	0	0	0	0	0
MAG378	d__Bacteria;p__Acidobacteriota;c__Blastocatellia;o__Pyrinomonadales;f__Pyrinomonadaceae;g__Unclassified;s__Unclassified	Yunnan	0	0	0	0	0	0	0	0	0	0	0	0	0	0	0	0	0	0	0	0	0	0	0	0	0	0	0	0	0	0	0	0	0	0	0	0	0	0	0	0	0	0	0	0	0	0	0
MAG379	d__Bacteria;p__Patescibacteria;c__Saccharimonadia;o__Saccharimonadales;f__UBA1547;g__JALRBM01;s__Unclassified	Yunnan	0	0	0	0	0	0	0	0	0	0	0	0	0	0	0	0	0	0	0	0	0	0	0	0	0	0	0	0	0	0	0	0	0	0	0	0	0	0	0	0	0	0	0	0	0	0	0
MAG38	d__Bacteria;p__Actinomycetota;c__Actinomycetia;o__Actinomycetales;f__Dermatophilaceae;g__Terrabacter;s__Unclassified	Sichuan、Guizhou、Yunnan、Jiangsu	0.0281366	0.342207	0	1.7392	0.16848	0.557474	3.20668	0	0.743673	0.520584	1.28075	0	0	0	0.269355	0.164435	0.297097	0	0.28738	0.171129	0	0	0	0	1.11694	0	0	0	0	0	0	0	0	0	0	0	0	0	0.249086	0	0	0	0	0	0	0	0
MAG380	d__Archaea;p__Thermoproteota;c__Nitrososphaeria;o__Nitrososphaerales;f__Nitrososphaeraceae;g__Nitrosocosmicus;s__Nitrosocosmicus oleophilus	Sichuan、Guizhou、Yunnan、Jiangsu	0	0	0	0	0.200186	0	0	0	0.335896	0.242901	0	0.125524	0	0	0	0.251306	0	0	0	0.235869	0	0.138998	0	0	0	0.234797	0.133408	0.409552	0.595026	0.589927	0.440497	0.276442	0.161103	0.336552	0.442271	0.593553	0.328024	0.252622	0.663825	0.649839	0.705853	0.324422	1.52365	0.390929	0.428286	0.466875	0.194013
MAG381	d__Bacteria;p__Acidobacteriota;c__Blastocatellia;o__Pyrinomonadales;f__Pyrinomonadaceae;g__OLB17;s__Unclassified	Sichuan	0.0129239	0	0	0	0.157823	0.0481082	0	0	0.157313	0.124441	0	0	0	0	0	0.249362	0	0	0.161942	0.123498	0	2.86626	0	0	0.20764	0	0	0	0	0	0	0	0	0	0	0	0	0	0	0	0	0	0	0	0	0	0
MAG382	d__Bacteria;p__Chloroflexota;c__UBA5177;o__UBA5177;f__UBA5177;g__Unclassified;s__Unclassified	Yunnan	0	0	0	0	0	0	0	0	0	0	0	0	0	0	0	0	0	0	0	0	0	0	0	0	0	0	0	0	0	0	0	0	0	0	0	0	0	0	0	0	0	0	0	0	0	0	0
MAG383	d__Bacteria;p__Pseudomonadota;c__Gammaproteobacteria;o__Pseudomonadales;f__Moraxellaceae;g__Acinetobacter;s__Acinetobacter pseudolwoffii	Sichuan、Guizhou、Yunnan	0.782345	0	0.107578	0	0	0	0	0	0	0	0	0	0.00740736	1.02233	0.357917	0	0	1.33706	0.025806	0	0.0180276	0.0498553	0.453497	0.0758311	0.0975017	0	0	0	0	0	0	0	0	0	0	0	0	0	0	0	0	0	0.0767335	0	0	0	0
MAG384	d__Bacteria;p__Actinomycetota;c__Actinomycetia;o__Actinomycetales;f__Microbacteriaceae;g__NC76-1;s__Unclassified	Sichuan	0	0	0	0	0	0	0	0	0	0	0	0	0.2053	0	0	0	0	0.0505307	0	0	0.112471	0	0	0.146039	0	0	0	0	0	0	0	0	0	0	0	0	0	0	0	0	0	0	0	0	0	0	0
MAG385	d__Bacteria;p__Actinomycetota;c__Acidimicrobiia;o__Acidimicrobiales;f__JAAYBP01;g__Unclassified;s__Unclassified	Sichuan、Guizhou、Jiangsu	0.0364357	0	0	0.0653061	0	0	0	0	0	0	0	0	0	0	0	0	0	0	0.0607103	0	0	0	0	0	0	0	0.221174	0	0	0	0	0	0	0	0	0	0	0	0	0	0	0.25306	0.0594833	0	0	0	0
MAG386	d__Bacteria;p__Actinomycetota;c__Actinomycetia;o__Mycobacteriales;f__CADCTP01;g__CADCTP01;s__Unclassified	Yunnan、Jiangsu	0	0	0	0	0	0	0	0	0	0	0	0	0	0	0	0	0	0	0	0	0	0	0	0	0	0	0	0	0	0	0	0	0	0	0	0	0	0	0	0	0	0	0	0	0	0	0
MAG387	d__Bacteria;p__Myxococcota;c__Polyangia;o__Nannocystales;f__Nannocystaceae;g__Nannocystis;s__Unclassified	Sichuan	0	0	0	0	0	0	0	0.443031	0	0	0	0	0	0	0.0567544	0	2.81611	0	0	0	0	0	0	0	0	0	0	0	0	0	0	0	0	0	0	0	0	0	0	0	0	0	0	0	0	0	0
MAG388	d__Bacteria;p__Patescibacteria;c__Saccharimonadia;o__Saccharimonadales;f__UBA4665;g__Unclassified;s__Unclassified	Yunnan	0	0	0	0	0	0	0	0	0	0	0	0	0	0	0	0	0	0	0	0	0	0	0	0	0	0	0	0	0	0	0	0	0	0	0	0	0	0	0	0	0	0	0	0	0	0	0
MAG389	d__Bacteria;p__Pseudomonadota;c__Alphaproteobacteria;o__Sphingomonadales;f__Sphingomonadaceae;g__Sphingomicrobium;s__Unclassified	Yunnan	0	0	0	0	0	0	0	0	0	0	0	0	0	0	0	0	0	0	0	0	0	0	0	0	0	0	0	0	0	0	0	0	0	0	0	0	0	0	0	0	0	0	0	0	0	0	0
MAG39	d__Bacteria;p__Pseudomonadota;c__Gammaproteobacteria;o__Xanthomonadales;f__Rhodanobacteraceae;g__Rhodanobacter;s__Unclassified	Jiangsu	0	0	0	0	0	0	0	0	0	0	0	0	0	0	0	0	0	0	0	0	0	0	0	0	0	0	0	0	0	0	0	0	0	0	0	0	0	0	0	0	0	0	0	0	0	0	0
MAG390	d__Bacteria;p__Gemmatimonadota;c__Gemmatimonadetes;o__Gemmatimonadales;f__Gemmatimonadaceae;g__AG11;s__Unclassified	Guizhou、Yunnan	0	0	0	0	0	0	0	0	0	0	0	0	0	0	0	0	0	0	0	0	0	0	0	0	0	0	0	0	0.752174	0	0	0	0	4.2442	0	0.63236	0	0	0.328724	0	0	0	0	0	0	0	0
MAG391	d__Bacteria;p__Acidobacteriota;c__Blastocatellia;o__Pyrinomonadales;f__Pyrinomonadaceae;g__Unclassified;s__Unclassified	Yunnan	0	0	0	0	0	0	0	0	0	0	0	0	0	0	0	0	0	0	0	0	0	0	0	0	0	0	0	0	0	0	0	0	0	0	0	0	0	0	0	0	0	0	0	0	0	0	0
MAG392	d__Bacteria;p__Bacteroidota;c__Bacteroidia;o__Flavobacteriales;f__Weeksellaceae;g__Moheibacter;s__Unclassified	Sichuan	0	0	0.00478327	0	0	0	0	0	0	0	0	0	0.745445	0	0.303148	0	0	0.146424	0	0	0.648866	0	0.0157153	0	0	0	0	0	0	0	0	0	0	0	0	0	0	0	0	0	0	0	0	0	0	0	0
MAG393	d__Bacteria;p__Bacteroidota;c__Bacteroidia;o__Flavobacteriales;f__Flavobacteriaceae;g__JAJYTI01;s__Unclassified	Sichuan、Yunnan	0	0	0	0	0	0	0	0	0	0	0	0	11.5804	0	0.636356	0.185757	0	0.71401	0	0	0.731472	0	0.0416925	0.0586791	0.144381	0	0	0	0	0	0	0	0	0	0	0	0	0	0	0	0	0	0	0	0	0	0
MAG394	d__Bacteria;p__Actinomycetota;c__Actinomycetia;o__Actinomycetales;f__Microbacteriaceae;g__Amnibacterium;s__Unclassified	Jiangsu	0	0	0	0	0	0	0	0	0	0	0	0	0	0	0	0	0	0	0	0	0	0	0	0	0	0	0	0	0	0	0	0	0	0	0	0	0	0	0	0	0	0	0	0	0	0	0
MAG395	d__Bacteria;p__Gemmatimonadota;c__Gemmatimonadetes;o__Gemmatimonadales;f__GWC2-71-9;g__Unclassified;s__Unclassified	Jiangsu	0	0	0	0	0	0	0	0	0	0	0	0	0	0	0	0	0	0	0	0	0	0	0	0	0	0	0	0	0	0	0	0	0	0	0	0	0	0	0	0	0	0	0	0	0	0	0
MAG396	d__Bacteria;p__Actinomycetota;c__Thermoleophilia;o__Solirubrobacterales;f__70-9;g__Unclassified;s__Unclassified	Yunnan	0	0	0	0	0	0	0	0	0	0	0	0	0	0	0	0	0	0	0	0	0	0	0	0	0	0	0	0	0	0	0	0	0	0	0	0	0	0	0	0	0	0	0	0	0	0	0
MAG397	d__Bacteria;p__Actinomycetota;c__Actinomycetia;o__Propionibacteriales;f__Nocardioidaceae;g__Aeromicrobium;s__Unclassified	Sichuan、Guizhou	0.534806	0.0945877	0	0.771836	0.109595	0.0684833	0.165681	0.450912	0.593859	0.187799	0.833221	0	0	0	0.147017	0	0	0	0.826387	0.084989	0	0.299933	0.0378277	0	0.288249	0	0	0	0	0	0	0	0	0	0	0	0	0	0	0	0.215895	0.141309	0	0	0	0	0
MAG398	d__Bacteria;p__Pseudomonadota;c__Alphaproteobacteria;o__Sphingomonadales;f__Sphingomonadaceae;g__Sphingomonas_I;s__Unclassified	Yunnan	0	0	0	0	0	0	0	0	0	0	0	0	0	0	0	0	0	0	0	0	0	0	0	0	0	0	0	0	0	0	0	0	0	0	0	0	0	0	0	0	0	0	0	0	0	0	0
MAG399	d__Bacteria;p__Acidobacteriota;c__Blastocatellia;o__Pyrinomonadales;f__Pyrinomonadaceae;g__PSRF01;s__Unclassified	Guizhou、Jiangsu	0	0	0	0	0	0	0	0	0	0	0	0	0	0	0	0	0	0	0	0	0	0	0	0	0	0.321023	0.0981048	0.19669	0	0.203262	0.193912	0.241773	1.22474	0	0.356808	0.231003	0.481949	0	0	0	0.135887	2.14981	0.265602	0.871744	0.854137	1.23446	0.06135
MAG4	d__Bacteria;p__Bacillota;c__Bacilli;o__Lactobacillales;f__Aerococcaceae;g__Aerococcus;s__Aerococcus urinaeequi	Sichuan、Yunnan、Jiangsu	0	0	4.31914	0	0	0	0	0.25161	0	0	0	0	0.0381889	0	0.108801	0	0	0.174199	0	0	0.927176	0	0.125889	0.0872771	0.120586	0	0	0	0	0	0	0	0	0	0	0	0	0	0	0	0	0	0	0	0	0	0
MAG40	d__Bacteria;p__Acidobacteriota;c__Thermoanaerobaculia;o__UBA5704;f__UBA5704;g__UBA5704;s__Unclassified	Yunnan、Jiangsu	0	0	0	0	0	0	0	0	0	0	0	0	0	0	0	0	0	0	0	0	0	0	0	0	0	0	0	0	0	0	0	0	0	0	0	0	0	0	0	0	0	0	0	0	0	0	0
MAG400	d__Bacteria;p__Bacteroidota;c__Bacteroidia;o__Flavobacteriales;f__Weeksellaceae;g__Chryseobacterium;s__Chryseobacterium cucumeris	Jiangsu	0	0	0	0	0	0	0	0	0	0	0	0	0	0	0	0	0	0	0	0	0	0	0	0	0	0	0	0	0	0	0	0	0	0	0	0	0	0	0	0	0	0	0	0	0	0	0
MAG401	d__Bacteria;p__Deinococcota;c__Deinococci;o__Deinococcales;f__Deinococcaceae;g__Deinococcus;s__Deinococcus radiopugnans	Sichuan、Jiangsu	0.109586	0	0	0.70446	0.27271	0.14889	0	0.155345	0.17674	0.164146	0	0	0	0	0.193623	0.151762	0.0805438	0	0.885186	0	0	0.384354	0.117303	0	0	0	0	0	0	0	0	0	0	0	0	0	0	0	0	0	0	0	0	0	0	0	0
MAG402	d__Bacteria;p__Bacteroidota;c__Bacteroidia;o__Flavobacteriales;f__Flavobacteriaceae;g__Flavobacterium;s__Flavobacterium sp018384465	Sichuan	0.0237122	0	0.502279	0	0	0	0	0	0	0	0	0	0.0348596	1.95205	0	0	0	0.0221075	0	0	0.0153152	0	0.0967237	0.114641	0	0	0	0	0	0	0	0	0	0	0	0	0	0	0	0	0	0	0	0	0	0	0
MAG403	d__Bacteria;p__Pseudomonadota;c__Alphaproteobacteria;o__Caulobacterales;f__Caulobacteraceae;g__Brevundimonas;s__Brevundimonas sp002979535	Sichuan、Guizhou、Jiangsu	0.0200142	0.0822037	0	0	0	0	0	0	0	0	0	0	0	0.0298779	0	0	0	0	0.0784255	0	0	0	0.0501705	0	0.21566	0	0.241156	0	0	0	0	0.112385	0	0	0	0	0	0	0	0	4.42857	0.935545	0.187609	0	0	0	0
MAG404	d__Bacteria;p__Gemmatimonadota;c__Gemmatimonadetes;o__Gemmatimonadales;f__Gemmatimonadaceae;g__JABFXC01;s__Unclassified	Guizhou、Yunnan	0	0	0	0	0	0	0	0	0	0	0	0	0	0	0	0	0	0	0	0	0	0	0	0	0	0	0	0	0.386338	0	0	0	0	1.79414	0	0.344952	0	0	0.196105	0	0	0	0	0	0	0	0
MAG405	d__Bacteria;p__Pseudomonadota;c__Gammaproteobacteria;o__Xanthomonadales;f__Rhodanobacteraceae;g__66-474;s__Unclassified	Jiangsu	0	0	0	0	0	0	0	0	0	0	0	0	0	0	0	0	0	0	0	0	0	0	0	0	0	0	0	0	0	0	0	0	0	0	0	0	0	0	0	0	0	0	0	0	0	0	0
MAG406	d__Bacteria;p__Nitrospirota;c__Nitrospiria;o__Nitrospirales;f__Nitrospiraceae;g__Nitrospira_F;s__Unclassified	Sichuan、Guizhou、Jiangsu	0	1.33106	0	0.252681	0.65577	0	0.490209	0	0.46634	0.928033	0	0	0	0	0.132183	0.656643	0	0	0	0.934709	0	0.169681	0	0	0.608771	0.27516	0.257312	0	0	0	0.370842	0	0	0	0.181669	0	0.147059	0	0	0	0.38524	0.134861	0.0839664	0	0	0	0
MAG407	d__Bacteria;p__Actinomycetota;c__Actinomycetia;o__Actinomycetales;f__Dermatophilaceae;g__Piscicoccus;s__Piscicoccus intestinalis	Sichuan、Yunnan、Jiangsu	0	0	0.0284409	0	0	0	0	0	0	0	0	0	0	0	0	0	0	0	0	0	0	0	1.11224	0	0	0	0	0	0	0	0	0	0	0	0	0	0	0	0	0	0	0	0	0	0	0	0
MAG408	d__Bacteria;p__Bacteroidota;c__Bacteroidia;o__Chitinophagales;f__Chitinophagaceae;g__Flavisolibacter;s__Unclassified	Sichuan	0	0	0	0	0	0	0	0	0	0	0	0	0	0	0.344712	0	3.57355	0	0	0	0	0	0	0	0	0	0	0	0	0	0	0	0	0	0	0	0	0	0	0	0	0	0	0	0	0	0
MAG409	d__Bacteria;p__Bacteroidota;c__Bacteroidia;o__Flavobacteriales;f__Flavobacteriaceae;g__Flavobacterium;s__Unclassified	Sichuan	0	0	0	0	0	0	0	0	0	0	0	0	0	0	0	0	0	0	0	0	0	0	0.627764	0	0	0	0	0	0	0	0	0	0	0	0	0	0	0	0	0	0	0	0	0	0	0	0
MAG41	d__Bacteria;p__Pseudomonadota;c__Gammaproteobacteria;o__Pseudomonadales;f__Moraxellaceae;g__Acinetobacter;s__Acinetobacter bohemicus	Sichuan、Guizhou	0.0632462	0	0	0	0	0	0	0	0	0	0	0	0	0	0	0	0	0	0	0	0	0	0	0	0	0	0	0	0	0	0	0.118913	0	0	0	0	0	0	0	0	4.15555	0.137423	1.00368	0	0	0	0
MAG410	d__Bacteria;p__Pseudomonadota;c__Gammaproteobacteria;o__Steroidobacterales;f__Steroidobacteraceae;g__RPQJ01;s__Unclassified	Sichuan、Guizhou、Jiangsu	0	0	0	0	0	0	0	0	0	0.219278	0	0.327893	0	0	0	0	0	0	0	0.263093	0	0	0	0	0	0.185647	0.133374	0	0	0	0.549875	0	0	0	0	0	0	0.372957	0	0	0.201603	0.273098	0.0795613	0	0	0	0
MAG411	d__Bacteria;p__Pseudomonadota;c__Alphaproteobacteria;o__Rhodobacterales;f__Rhodobacteraceae;g__Roseovarius;s__Unclassified	Sichuan	0	0	0	0	0	0	0	0	0	0	0	0	0.620795	0	0.0826596	0	0	0.00958303	0	0	0.0675134	0	0.01807	0	0	0	0	0	0	0	0	0	0	0	0	0	0	0	0	0	0	0	0	0	0	0	0
MAG412	d__Bacteria;p__Actinomycetota;c__Actinomycetia;o__Actinomycetales;f__Microbacteriaceae;g__Agrococcus;s__Unclassified	Sichuan	0	0	0.61705	0	0	0	0	0	0	0	0	0	0	0	0	0	0	0	0	0	0	0	0	0	0	0	0	0	0	0	0	0	0	0	0	0	0	0	0	0	0	0	0	0	0	0	0
MAG413	d__Archaea;p__Thermoproteota;c__Nitrososphaeria;o__Nitrososphaerales;f__Nitrososphaeraceae;g__TH1177;s__Unclassified	Guizhou、Yunnan、Jiangsu	0	0	0	0	0	0	0	0	0	0	0	0	0	0	0	0	0	0	0	0	0	0	0	0	0	0	0	1.32888	0	1.04466	0.245399	0	0.880447	0	0	0.396759	0.992513	0	0.416194	0.210166	0	0	0	0.781727	1.32866	0	1.70439
MAG414	d__Bacteria;p__Pseudomonadota;c__Alphaproteobacteria;o__Rhodobacterales;f__Rhodobacteraceae;g__Paracoccus;s__Unclassified	Sichuan	0	0	0.531492	0	0	0	0	0	0	0	0	0	0	0	0	0	0	0	0.0313776	0	0	0	0	0	0	0	0	0	0	0	0	0	0	0	0	0	0	0	0	0	0	0	0	0	0	0	0
MAG415	d__Archaea;p__Thermoplasmatota;c__E2;o__JACPAO01;f__JAHFTW01;g__Unclassified;s__Unclassified	Jiangsu	0	0	0	0	0	0	0	0	0	0	0	0	0	0	0	0	0	0	0	0	0	0	0	0	0	0	0	0	0	0	0	0	0	0	0	0	0	0	0	0	0	0	0	0	0	0	0
MAG416	d__Bacteria;p__Pseudomonadota;c__Gammaproteobacteria;o__Xanthomonadales;f__Xanthomonadaceae;g__Lysobacter_B;s__Lysobacter_B sp011300685	Sichuan、Guizhou、Yunnan	0.0903006	0.201457	0	0.161814	0.269955	0.139226	1.03527	0.392874	1.31617	0.949863	0	0	0	0	0	0.374742	0	0	1.01873	0.152794	0	4.03677	0.264751	0	0.337753	0	0	0	0	0	0	0	0	0	0	0	0	0	0	0	0	0.51878	0	0	0	0	0
MAG417	d__Bacteria;p__Pseudomonadota;c__Alphaproteobacteria;o__Sphingomonadales;f__Sphingomonadaceae;g__Allosphingosinicella;s__Unclassified	Yunnan	0	0	0	0	0	0	0	0	0	0	0	0	0	0	0	0	0	0	0	0	0	0	0	0	0	0	0	0	0	0	0	0	0	0	0	0	0	0	0	0	0	0	0	0	0	0	0
MAG418	d__Bacteria;p__Bacteroidota;c__Bacteroidia;o__Flavobacteriales;f__Weeksellaceae;g__Kaistella;s__Unclassified	Sichuan	0	0	0	0	0	0	0	0	0	0	0	0	0	2.27911	0.123947	0	0	0	0	0	0	0	0.0541256	0	0	0	0	0	0	0	0	0	0	0	0	0	0	0	0	0	0	0	0	0	0	0	0
MAG419	d__Bacteria;p__Cyanobacteriota;c__Cyanobacteriia;o__Cyanobacteriales;f__Chroococcidiopsidaceae;g__Chroococcidiopsis;s__Chroococcidiopsis thermalis	Sichuan、Guizhou、Jiangsu	0	0	0	0	0.0575736	0	0	1.4297	1.3347	0.330002	0	0	0	0	0.450447	0	1.14558	0	0	1.24125	0	2.06938	0	0	0	0	0	0	0	0	0	0	0	0	0	0	0	0.715722	0	0	0	0	0	0	0	0	0
MAG42	d__Bacteria;p__Chloroflexota;c__UBA6077;o__UBA6077;f__CF-72;g__Unclassified;s__Unclassified	Yunnan	0	0	0	0	0	0	0	0	0	0	0	0	0	0	0	0	0	0	0	0	0	0	0	0	0	0	0	0	0	0	0	0	0	0	0	0	0	0	0	0	0	0	0	0	0	0	0
MAG420	d__Bacteria;p__Pseudomonadota;c__Alphaproteobacteria;o__Sphingomonadales;f__Sphingomonadaceae;g__Sphingomicrobium;s__Unclassified	Sichuan、Guizhou	0	3.05918	0	0	1.00264	0	0.588244	0	0	0.203013	0	0.105608	0	0	0.249125	1.66721	0.116743	0	0	0.142242	0	0	0	0	0.158412	0.179279	0.326824	0	0	0	0	0	0	0	0	0	0	0	0	0	0	0	0	0	0	0	0
MAG421	d__Bacteria;p__Bacteroidota;c__Bacteroidia;o__Sphingobacteriales;f__Sphingobacteriaceae;g__Sphingobacterium;s__Unclassified	Sichuan	0	0	0.0629129	0	0	0	0	0	0	0	0	0	0.0180996	1.67339	0	0	0	0.0154512	0	0	0.0155413	0	0	0.199068	0.29325	0	0	0	0	0	0	0	0	0	0	0	0	0	0	0	0	0	0	0	0	0	0
MAG422	d__Bacteria;p__Cyanobacteriota;c__Cyanobacteriia;o__Cyanobacteriales;f__Coleofasciculaceae;g__Unclassified;s__Unclassified	Guizhou、Jiangsu	0	0	0	0	0	0	0	0	0	0	0	0	0	0	0	0	0	0	0	0	0	0	0	0	0	0	0	0	0	0	0	0	0	0	0	0	0	0	0	0	0	0	0	0	0	0.119034	0.497984
MAG423	d__Bacteria;p__Bacteroidota;c__Bacteroidia;o__Cytophagales;f__Cyclobacteriaceae;g__Chryseolinea;s__Unclassified	Guizhou、Jiangsu	0	0	0	0	0	0	0	0	0	0	0	0	0	0	0	0	0	0	0	0	0	0	0	0	0	0.4845	0.473468	2.02801	0	2.32358	1.3708	0	0	0	0.372001	0.220959	0.42929	0.216242	0.318384	0.221246	1.39098	0.108344	0.144358	0.233606	0.111095	0	0.753776
MAG424	d__Bacteria;p__Bacillota;c__Bacilli;o__Staphylococcales;f__Salinicoccaceae;g__Salinicoccus;s__Unclassified	Sichuan	0	0	0.00540934	0	0	0	0	0.0660555	0	0	0	0	0	0.595515	0	0	0	0.0140188	0	0	0.0472809	0	0	0	0	0	0	0	0	0	0	0	0	0	0	0	0	0	0	0	0	0	0	0	0	0	0
MAG425	d__Bacteria;p__Pseudomonadota;c__Gammaproteobacteria;o__Pseudomonadales;f__Pseudomonadaceae;g__Thiopseudomonas;s__Thiopseudomonas sp012800475	Sichuan、Yunnan	0	0	0	0	0	0	0	0	0	0	0	0	0.530212	0	0	0	0	2.45043	0	0	0.346407	0	0	0.120077	0	0	0	0	0	0	0	0	0	0	0	0	0	0	0	0	0	0	0	0	0	0	0
MAG426	d__Bacteria;p__Actinomycetota;c__Thermoleophilia;o__Solirubrobacterales;f__70-9;g__VAYN01;s__Unclassified	Jiangsu	0	0	0	0	0	0	0	0	0	0	0	0	0	0	0	0	0	0	0	0	0	0	0	0	0	0	0	0	0	0	0	0	0	0	0	0	0	0	0	0	0	0	0	0	0	0	0
MAG427	d__Bacteria;p__Actinomycetota;c__Thermoleophilia;o__Solirubrobacterales;f__Solirubrobacteraceae;g__Unclassified;s__Unclassified	Yunnan	0	0	0	0	0	0	0	0	0	0	0	0	0	0	0	0	0	0	0	0	0	0	0	0	0	0	0	0	0	0	0	0	0	0	0	0	0	0	0	0	0	0	0	0	0	0	0
MAG428	d__Bacteria;p__Actinomycetota;c__Actinomycetia;o__Actinomycetales;f__Microbacteriaceae;g__Microbacterium;s__Unclassified	Sichuan、Guizhou、Jiangsu	0.087428	0	0	0.178923	0.0888887	0.173035	0	0	0	0	0	0	0	0	0.0536172	0.0605094	0	0	0.0901117	0	0	0	0.0183371	0	0	0	0.164033	0	0	0	0	0	0	0	0	0	0	0	0	0	0.109432	0	0	0	0	0	0
MAG429	d__Bacteria;p__Pseudomonadota;c__Gammaproteobacteria;o__Burkholderiales;f__Burkholderiaceae_B;g__Variovorax;s__Unclassified	Yunnan	0	0	0	0	0	0	0	0	0	0	0	0	0	0	0	0	0	0	0	0	0	0	0	0	0	0	0	0	0	0	0	0	0	0	0	0	0	0	0	0	0	0	0	0	0	0	0
MAG43	d__Bacteria;p__Chloroflexota;c__Limnocylindria;o__Limnocylindrales;f__CSP1-4;g__SPCO01;s__Unclassified	Sichuan	0	0.53359	0	0	3.21544	0.345562	1.38065	0	0	0.67094	0.374644	0.240281	0	0	0.045355	4.61626	0	0	0	0.626271	0	0	0	0	0.203613	0	0	0	0	0	0	0	0	0	0	0	0	0	0	0	0	0	0	0	0	0	0
MAG430	d__Bacteria;p__Gemmatimonadota;c__Gemmatimonadetes;o__Gemmatimonadales;f__Gemmatimonadaceae;g__Gemmatirosa;s__Unclassified	Sichuan	0	0	0	0	0	0	0	0.214938	0.0999357	0	0	0	0	0	0.429932	0	2.81651	0	0	0	0	0	0	0	0	0	0	0	0	0	0	0	0	0	0	0	0	0	0	0	0	0	0	0	0	0	0
MAG431	d__Bacteria;p__Pseudomonadota;c__Gammaproteobacteria;o__Pseudomonadales;f__Pseudomonadaceae;g__Thiopseudomonas;s__Thiopseudomonas sp012518175	Sichuan、Yunnan	0	0	0	0	0	0	0	0	0	0	0	0	4.15968	0	0	0	0	0.824068	0	0	0.511917	0	0	0.303731	0	0	0	0	0	0	0	0	0	0	0	0	0	0	0	0	0	0	0	0	0	0	0
MAG432	d__Bacteria;p__Pseudomonadota;c__Alphaproteobacteria;o__Rhizobiales;f__Xanthobacteraceae;g__Bradyrhizobium;s__Unclassified	Yunnan	0	0	0	0	0	0	0	0	0	0	0	0	0	0	0	0	0	0	0	0	0	0	0	0	0	0	0	0	0	0	0	0	0	0	0	0	0	0	0	0	0	0	0	0	0	0	0
MAG433	d__Bacteria;p__Bacillota;c__Bacilli;o__Bacillales;f__Planococcaceae;g__Sporosarcina;s__Unclassified	Sichuan、Yunnan	0.439643	0	0.0319742	0	0	0	0	0	0	0	0	0	0.766505	0.026993	0.0832628	0	0	0.490227	0.0199452	0	0.791696	0	0.282249	0.693089	0	0	0	0	0	0	0	0	0	0	0	0	0	0	0	0	0	0	0	0	0	0	0
MAG434	d__Bacteria;p__Bacillota;c__Bacilli;o__Lactobacillales;f__Enterococcaceae;g__Enterococcus_B;s__Enterococcus_B faecium	Sichuan、Jiangsu	0.964005	0	0	0	0	0	0	0	0	0	0	0	0	0	0	0	0	0	0.0200065	0	0	0	0	0	0	0	0	0	0	0	0	0	0	0	0	0	0	0	0	0	0	0	0	0	0	0	0
MAG435	d__Bacteria;p__Bacteroidota;c__Bacteroidia;o__Bacteroidales;f__Dysgonomonadaceae;g__UBA2632;s__Unclassified	Sichuan、Yunnan	0	0	0.110013	0	0.0633411	0	0.138731	0	0	0	0	0	1.22463	0.121915	0.27385	0	0	1.31634	0	0	4.01487	0	0.116559	0.67082	0	0	0	0	0	0	0	0	0	0	0	0	0	0	0	0	0	0	0	0	0	0	0
MAG436	d__Archaea;p__Thermoproteota;c__Nitrososphaeria;o__Nitrososphaerales;f__Nitrososphaeraceae;g__Nitrosocosmicus;s__Nitrosocosmicus oleophilus	Sichuan、Guizhou、Yunnan、Jiangsu	0	0.0735616	0	0.0731907	0.722969	0.0454512	0.233867	0	0.896877	0.693222	0	0.349988	0	0	0.125579	0.758788	0	0	0	0.70563	0	0.377924	0	0	0.131446	0.321029	0.19368	0.405791	0.705829	0.506073	0.775092	0.184748	0.125497	0.450413	0.67943	0.5895	0.338519	0.211852	0.64938	1.01795	0.828288	0.475959	0.281296	0.3703	0.433707	0.456806	0.126169
MAG437	d__Bacteria;p__Patescibacteria;c__Microgenomatia;o__Levybacterales;f__UBA12049;g__PRDT01;s__Unclassified	Jiangsu	0	0	0	0	0	0	0	0	0	0	0	0	0	0	0	0	0	0	0	0	0	0	0	0	0	0	0	0	0	0	0	0	0	0	0	0	0	0	0	0	0	0	0	0	0	0	0
MAG438	d__Bacteria;p__Cyanobacteriota;c__Cyanobacteriia;o__Leptolyngbyales;f__Leptolyngbyaceae;g__DSRU01;s__DSRU01 sp015296075	Jiangsu	0	0	0	0	0	0	0	0	0	0	0	0	0	0	0	0	0	0	0	0	0	0	0	0	0	0	0	0	0	0	0	0	0	0	0	0	0	0	0	0	0	0	0	0	0	0	0
MAG439	d__Bacteria;p__Nitrospirota;c__Nitrospiria;o__Nitrospirales;f__Nitrospiraceae;g__Nitrospira_C;s__Unclassified	Guizhou、Jiangsu	0	0	0	0	0	0	0	0	0	0	0	0	0	0	0	0	0	0	0	0	0	0	0	0	0	0.143441	0	0.48723	0	1.39076	0.31217	0	0.526186	0	0.313855	0	0.40193	0.302749	0	0.174673	0.353371	0	0	1.14536	0.813037	0	1.827
MAG44	d__Bacteria;p__Acidobacteriota;c__Terriglobia;o__Bryobacterales;f__Bryobacteraceae;g__TMP-7;s__Unclassified	Yunnan	0	0	0	0	0	0	0	0	0	0	0	0	0	0	0	0	0	0	0	0	0	0	0	0	0	0	0	0	0	0	0	0	0	0	0	0	0	0	0	0	0	0	0	0	0	0	0
MAG440	d__Bacteria;p__Actinomycetota;c__Actinomycetia;o__Actinomycetales;f__Microbacteriaceae;g__Leucobacter;s__Unclassified	Sichuan、Guizhou、Jiangsu	0.00877067	0	0	0	0	0	0	0	0	0	0	0	0	0	0	0	0	0	0	0	0	0	0.0345033	0	0	0.193635	7.0929	0	0	0	0	0	0	0	0	0	0	0	0	0	0	0	0	0	0	0	0
MAG441	d__Bacteria;p__Cyanobacteriota;c__Cyanobacteriia;o__Cyanobacteriales;f__Coleofasciculaceae;g__Allocoleopsis;s__Unclassified	Guizhou、Jiangsu	0	0	0	0	0	0	0	0	0	0	0	0	0	0	0	0	0	0	0	0	0	0	0	0	0	0	0	0	0	0	0	2.60723	0	0	0	0	0	0.367009	0	0	0	0.163214	2.30955	0	0	0.88786	0
MAG442	d__Bacteria;p__Bacillota;c__Bacilli;o__Lactobacillales;f__Lactobacillaceae;g__Lactobacillus;s__Lactobacillus amylovorus	Sichuan、Yunnan、Jiangsu	0.260721	0	0	0	0	0.0553367	0	0	0	0	0	0	0.0231546	0	0.123874	0	0	0.396748	0.0449095	0	0.370537	0	0	0.22051	0	0	0	0	0	0	0	0	0	0	0	0	0	0	0	0	0	0	0	0	0	0	0
MAG443	d__Bacteria;p__Bacteroidota;c__Bacteroidia;o__Chitinophagales;f__Chitinophagaceae;g__Unclassified;s__Unclassified	Sichuan	0	0	0	0	0	0	0	0	0	0	0	0	0	0	0	0	0	0	0	0	0	0	0.476113	0	0	0	0	0	0	0	0	0	0	0	0	0	0	0	0	0	0	0	0	0	0	0	0
MAG444	d__Bacteria;p__Bacteroidota;c__Bacteroidia;o__Chitinophagales;f__Chitinophagaceae;g__Unclassified;s__Unclassified	Sichuan	0	1.26922	0	0.112841	0.240836	0	0.265523	0	1.3862	2.725	0	0	0	0	0.0688312	0.508132	0	0	0	1.37861	0	0.576542	0	0	0.130641	0	0	0	0	0	0	0	0	0	0	0	0	0	0	0	0	0	0	0	0	0	0
MAG445	d__Bacteria;p__Actinomycetota;c__Thermoleophilia;o__Solirubrobacterales;f__70-9;g__RHKX01;s__Unclassified	Sichuan、Guizhou、Jiangsu	0	0	0	0	0	0	0	0	0	0.140533	0	0	0	0	0	0	0	0	0	0.163856	0	0	0	0	0	0	0	0	0	0	0	0	0	0	0	0	0	0	0	0	0	0.0821338	0	0	0	0	0
MAG446	d__Bacteria;p__Bacteroidota;c__Bacteroidia;o__Bacteroidales;f__Dysgonomonadaceae;g__Fermentimonas;s__Fermentimonas sp015478775	Sichuan、Guizhou	0.0507909	0	0.264144	0.0800496	0	0	0	0	0	0	0	0	0	0.0543256	0	0	0	0.0604896	0.0859963	0	0.0669886	0	0.094757	0	0	0	0.090191	0	0	0	0	0	0	0	0	0	0	0	0	0	0	0	0	0	0	0	0
MAG447	d__Bacteria;p__Pseudomonadota;c__Gammaproteobacteria;o__Enterobacterales_A;f__Aeromonadaceae;g__Oceanisphaera;s__Oceanisphaera sp012518835	Sichuan、Yunnan	0	0	0.0137333	0	0.0817186	0	0	0	0	0	0	0	8.18657	0	0.31214	1.70668	0	2.61906	0	0	1.7599	0	0.0102893	1.81652	0	0	0	0	0	0	0	0	0	0	0	0	0	0	0	0	0	0	0	0	0	0	0
MAG448	d__Bacteria;p__Bacteroidota;c__Bacteroidia;o__Flavobacteriales;f__Weeksellaceae;g__Planobacterium;s__Unclassified	Sichuan	0.239453	0	0.234042	0	0	0	0	0	0	0	0	0	0	0	0	0	0	0	0	0	0	0	0	0	0	0	0	0	0	0	0	0	0	0	0	0	0	0	0	0	0	0	0	0	0	0	0
MAG449	d__Bacteria;p__Actinomycetota;c__Actinomycetia;o__Mycobacteriales;f__Mycobacteriaceae;g__Corynebacterium;s__Corynebacterium faecigallinarum	Sichuan	0	0	3.48238	0	0	0	0	0	0	0	0	0	0	0.117559	0	0	0	0.00472937	0	0	0.0674959	0	0.164499	0	0	0	0	0	0	0	0	0	0	0	0	0	0	0	0	0	0	0	0	0	0	0	0
MAG45	d__Bacteria;p__Actinomycetota;c__Actinomycetia;o__Mycobacteriales;f__Mycobacteriaceae;g__Mycobacterium;s__Mycobacterium sp023460175	Sichuan	0.0289285	0.975386	0.239697	0	0.450208	0	0.546917	0.0565487	0	0	0	0	0	0.234472	0.0515575	0.306559	0	0	0	0.095417	0	0	0.0459878	0	0.529287	0	0	0	0	0	0	0	0	0	0	0	0	0	0	0	0	0	0	0	0	0	0
MAG450	d__Bacteria;p__Actinomycetota;c__Thermoleophilia;o__Solirubrobacterales;f__70-9;g__JAJKHV01;s__Unclassified	Sichuan	0	0	0	3.15915	0	0	0	0	0	0	0	0	0	0	0	0	0	0	0	0	0	0	0	0	0	0	0	0	0	0	0	0	0	0	0	0	0	0	0	0	0	0	0	0	0	0	0
MAG451	d__Bacteria;p__Gemmatimonadota;c__Gemmatimonadetes;o__Gemmatimonadales;f__Gemmatimonadaceae;g__JABFXC01;s__Unclassified	Yunnan	0	0	0	0	0	0	0	0	0	0	0	0	0	0	0	0	0	0	0	0	0	0	0	0	0	0	0	0	0	0	0	0	0	0	0	0	0	0	0	0	0	0	0	0	0	0	0
MAG452	d__Bacteria;p__Actinomycetota;c__Actinomycetia;o__Actinomycetales;f__Dermabacteraceae;g__Brachybacterium;s__Brachybacterium rhamnosum	Sichuan、Jiangsu	0	0	0.0419038	0	0	0	0	0	0	0	0	0	0	0	0	0	0	0	0	0	0	0	0.014113	0	0	0	0	0	0	0	0	0	0	0	0	0	0	0	0	0	0	0	0	0	0	0	0
MAG453	d__Bacteria;p__Bacteroidota;c__Bacteroidia;o__Chitinophagales;f__Chitinophagaceae;g__VBAS01;s__Unclassified	Guizhou、Yunnan、Jiangsu	0	0	0	0	0	0	0	0	0	0	0	0	0	0	0	0	0	0	0	0	0	0	0	0	0	1.21289	0.10845	0.347689	3.33136	2.09629	0.149379	0.96956	2.01536	0.339846	2.03377	1.40616	1.93256	0	1.51932	0.149661	0.109129	1.90198	0.942836	1.88055	3.73838	1.78152	0
MAG454	d__Bacteria;p__Acidobacteriota;c__Blastocatellia;o__Pyrinomonadales;f__Pyrinomonadaceae;g__Unclassified;s__Unclassified	Yunnan	0	0	0	0	0	0	0	0	0	0	0	0	0	0	0	0	0	0	0	0	0	0	0	0	0	0	0	0	0	0	0	0	0	0	0	0	0	0	0	0	0	0	0	0	0	0	0
MAG455	d__Bacteria;p__Pseudomonadota;c__Alphaproteobacteria;o__Sphingomonadales;f__Sphingomonadaceae;g__Allosphingosinicella;s__Unclassified	Sichuan	0	0.0911503	0	0	0.0662352	0	0	0.0702537	0.111587	0	0.414349	0	0	0	0.129556	0.111143	0	0	0.0286509	0	0	3.04291	0	0	0.142334	0	0	0	0	0	0	0	0	0	0	0	0	0	0	0	0	0	0	0	0	0	0
MAG456	d__Bacteria;p__Actinomycetota;c__Thermoleophilia;o__Gaiellales;f__Gaiellaceae;g__PALSA-600;s__Unclassified	Yunnan	0	0	0	0	0	0	0	0	0	0	0	0	0	0	0	0	0	0	0	0	0	0	0	0	0	0	0	0	0	0	0	0	0	0	0	0	0	0	0	0	0	0	0	0	0	0	0
MAG457	d__Bacteria;p__Actinomycetota;c__Thermoleophilia;o__Gaiellales;f__Gaiellaceae;g__Gaiella;s__Unclassified	Sichuan、Guizhou、Jiangsu	0	0.435695	0	0.378779	0.340528	0.0677002	0.386116	0	0.29447	0.532846	0	0	0	0	0.0692943	0.394608	0	0	0	0.491662	0	0.184608	0	0	0.186655	0	0	0	0	0.131144	0.232515	0	0.139125	0	0	0	0	0	0	0.186513	0	0.0941789	0	0	0	0	0.110194
MAG458	d__Bacteria;p__Bacteroidota;c__Rhodothermia;o__Rhodothermales;f__Rubricoccaceae;g__Unclassified;s__Unclassified	Sichuan	0	0.148154	0	0	0	0	0	0.179144	0	0	0	0	0	0	2.36046	0	1.58097	0	0	0	0	0.0739161	0	0	0	0	0	0	0	0	0	0	0	0	0	0	0	0	0	0	0	0	0	0	0	0	0
MAG459	d__Bacteria;p__Pseudomonadota;c__Gammaproteobacteria;o__Pseudomonadales;f__Moraxellaceae;g__Acinetobacter;s__Acinetobacter pseudolwoffii	Sichuan、Guizhou、Yunnan	1.06347	0	0.160071	0	0	0	0	0	0	0	0	0	0.00824704	1.35821	0.395261	0	0	1.38138	0.0318394	0	0.0184082	0.0592721	0.624335	0.0838042	0.121156	0	0	0	0	0	0	0	0	0	0	0	0	0	0	0	0	0	0.100472	0	0	0	0
MAG46	d__Bacteria;p__Acidobacteriota;c__Blastocatellia;o__Pyrinomonadales;f__Pyrinomonadaceae;g__UBA11740;s__Unclassified	Sichuan、Guizhou、Jiangsu	0	0	0	0	0	0	0	0	0	0	0	0.0814307	0	0	0	0	0	0	0	0	0	0	0	0	0	0	0	0	0	0	0	0	0	0	0	0	0	0	0	0	0	0	0	0	0	0	0
MAG460	d__Bacteria;p__Actinomycetota;c__Actinomycetia;o__Propionibacteriales;f__Propionibacteriaceae;g__Arachnia;s__Unclassified	Sichuan	0	0	0	0	0	0	0	0	0	0	0	0	0	0.70298	0	0	0	0	0	0	0	0	0	0	0	0	0	0	0	0	0	0	0	0	0	0	0	0	0	0	0	0	0	0	0	0	0
MAG461	d__Bacteria;p__Actinomycetota;c__Actinomycetia;o__Streptomycetales;f__Catenulisporaceae;g__Actinocrinis;s__Unclassified	Yunnan	0	0	0	0	0	0	0	0	0	0	0	0	0	0	0	0	0	0	0	0	0	0	0	0	0	0	0	0	0	0	0	0	0	0	0	0	0	0	0	0	0	0	0	0	0	0	0
MAG462	d__Bacteria;p__Pseudomonadota;c__Gammaproteobacteria;o__Pseudomonadales;f__Moraxellaceae;g__Acinetobacter;s__Acinetobacter pseudolwoffii	Sichuan、Guizhou、Yunnan	0.953481	0	0.111714	0	0	0	0	0	0	0	0	0	0.0100871	1.0542	0.295803	0	0	1.00846	0.0477689	0	0.0179957	0.0469319	0.521714	0.068347	0.0968421	0	0	0	0	0	0	0	0	0	0	0	0	0	0	0	0	0	0.0786202	0	0	0	0
MAG463	d__Bacteria;p__Actinomycetota;c__Thermoleophilia;o__Solirubrobacterales;f__70-9;g__RHKX01;s__Unclassified	Sichuan、Guizhou、Jiangsu	0	0	0	0	0	0	0	0	0	0.184442	0	0	0	0	0	0	0	0	0	0.212807	0	0	0	0	0	0	0	0	0	0	0	0	0.103841	0	0	0	0	0	0	0	0	0.0892048	0	0.0956483	0	0	0
MAG464	d__Bacteria;p__Pseudomonadota;c__Alphaproteobacteria;o__Sphingomonadales;f__Sphingomonadaceae;g__Allosphingosinicella;s__Unclassified	Sichuan	0	0	0	0	0	0.044314	0	0	1.48151	2.07038	0	0	0	0	0.349581	0	0	0	0	3.80281	0	0	0	0	0	0	0	0	0	0	0	0	0	0	0	0	0	0	0	0	0	0	0	0	0	0	0
MAG465	d__Archaea;p__Thermoproteota;c__Nitrososphaeria;o__Nitrososphaerales;f__Nitrososphaeraceae;g__TH1177;s__Unclassified	Guizhou、Yunnan、Jiangsu	0	0	0	0	0	0	0	0	0	0	0	0	0	0	0	0	0	0	0	0	0	0	0	0	0	0	0	1.38568	0	0.872332	0.166914	0	0.860511	0	0	0.289681	1.0268	0	0.293231	0	0	0	0	0.735726	1.34293	0	1.66803
MAG466	d__Bacteria;p__Chloroflexota;c__Limnocylindria;o__Limnocylindrales;f__CSP1-4;g__SPCO01;s__Unclassified	Guizhou、Jiangsu	0	0	0	0	0	0	0	0	0	0	0	0	0	0	0	0	0	0	0	0	0	0	0	0	0	0	0	0	0	0	0.12562	0	0	0	0	0	0	0.183428	0	0.0849076	0	0	0	0	0	0	0
MAG467	d__Bacteria;p__Pseudomonadota;c__Gammaproteobacteria;o__Pseudomonadales;f__Pseudomonadaceae;g__Pseudomonas_E;s__Pseudomonas_E helleri	Guizhou	0	0	0	0	0	0	0	0	0	0	0	0	0	0	0	0	0	0	0	0	0	0	0	0	0	0	0	0	0	0	0	0.814409	0	0	0	0	0	0	0	0	0	0	2.43926	0	0	0	0
MAG468	d__Bacteria;p__Acidobacteriota;c__Blastocatellia;o__Pyrinomonadales;f__Pyrinomonadaceae;g__OLB17;s__Unclassified	Sichuan	0	0.967827	0	0.0608139	0.519205	0.0890012	0.778402	0	0.320324	0.68555	0	0.171613	0	0	0.0690931	0.720758	0	0	0	0.981728	0	0.197048	0	0	0.335519	0	0	0	0	0	0	0	0	0	0	0	0	0	0	0	0	0	0	0	0	0	0
MAG469	d__Bacteria;p__Bacteroidota;c__Bacteroidia;o__Chitinophagales;f__Chitinophagaceae;g__JADCRZ01;s__Unclassified	Sichuan	0	0	0	0	0.36475	0	0.402553	0	0	0	0.838363	0	0	0	0.441194	0.365059	2.65533	0	0	0	0	0	0	0	0.239032	0	0	0	0	0	0	0	0	0	0	0	0	0	0	0	0	0	0	0	0	0	0
MAG47	d__Bacteria;p__Bacillota;c__Bacilli;o__Lactobacillales;f__Enterococcaceae;g__Enterococcus_I;s__Enterococcus_I aquimarinus	Sichuan、Yunnan	0.94163	0	0.177064	0	0	0	0	0	0	0	0	0	0.0456091	0.0162018	0	0	0	0.364723	0.0930976	0	0.266906	0	1.45437	0.0466917	0	0	0	0	0	0	0	0	0	0	0	0	0	0	0	0	0	0	0	0	0	0	0
MAG470	d__Archaea;p__Thermoproteota;c__Nitrososphaeria;o__Nitrososphaerales;f__Nitrosopumilaceae;g__Nitrosotenuis;s__Unclassified	Jiangsu	0	0	0	0	0	0	0	0	0	0	0	0	0	0	0	0	0	0	0	0	0	0	0	0	0	0	0	0	0	0	0	0	0	0	0	0	0	0	0	0	0	0	0	0	0	0	0
MAG471	d__Bacteria;p__Cyanobacteriota;c__Cyanobacteriia;o__Gloeomargaritales;f__Unclassified;g__Unclassified;s__Unclassified	Guizhou	0	0	0	0	0	0	0	0	0	0	0	0	0	0	0	0	0	0	0	0	0	0	0	0	0	6.40902	0	0	0	0	0	0	0	0	0	2.1876	28.5394	0	0	0	0	0	0	0.175181	0	0	0
MAG472	d__Bacteria;p__Actinomycetota;c__Actinomycetia;o__Actinomycetales;f__Dermabacteraceae;g__Brachybacterium;s__Brachybacterium sp012799425	Sichuan、Yunnan	0	0	0.35633	0	0.0585808	0	0	0.0954774	0	0.0854921	0	0	0.0495522	0.727577	0.707614	0	0	0.376663	0	0	1.40131	0	0.03657	2.521	0.877049	0	0	0	0	0	0	0	0	0	0	0	0	0	0	0	0	0	0	0	0	0	0
MAG473	d__Bacteria;p__Cyanobacteriota;c__Cyanobacteriia;o__Cyanobacteriales;f__Nostocaceae;g__Scytonema;s__Unclassified	Guizhou、Jiangsu	0	0	0	0	0	0	0	0	0	0	0	0	0	0	0	0	0	0	0	0	0	0	0	0	0	0	0	0	0	0	0	0	0	0	0	0	0	0.29948	0	0	0	0	0	0	0	0.306154	0.408033
MAG474	d__Bacteria;p__Pseudomonadota;c__Alphaproteobacteria;o__Rhizobiales;f__Rhizobiaceae;g__Paenochrobactrum;s__Unclassified	Sichuan	0	0	0.0190477	0	0	0	0	0	0	0	0	0	0.40804	0.0429188	0.0532795	0	0	0.0567949	0	0	0.188242	0	0	0.101174	0.0938411	0	0	0	0	0	0	0	0	0	0	0	0	0	0	0	0	0	0	0	0	0	0
MAG475	d__Archaea;p__Thermoproteota;c__Nitrososphaeria;o__Nitrososphaerales;f__Nitrososphaeraceae;g__Nitrosocosmicus;s__Nitrosocosmicus oleophilus	Sichuan、Guizhou、Yunnan、Jiangsu	0	0	0	0	0.228449	0	0	0	0.356958	0.25876	0	0.126957	0	0	0.0437973	0.335056	0	0	0	0.320962	0	0.159648	0	0	0	0.502698	0.195164	0.54524	0.825081	0.838516	0.64362	0.177572	0.182379	0.470942	2.67385	0.840137	0.472134	0.32128	0.898629	1.14003	0.740298	0.32404	0.235351	0.490685	0.580629	0.412172	0.212834
MAG476	d__Bacteria;p__Actinomycetota;c__Actinomycetia;o__Actinomycetales;f__Dermatophilaceae;g__Ornithinicoccus;s__Ornithinicoccus ciconiae	Sichuan、Guizhou、Jiangsu	0.788438	0	0.152805	0.551794	0.166177	0.0496096	0	0.0973107	0.101312	0	0	0	0	0	0	0.0995322	0	0	0.305244	0	0	0	0.28172	0	0	0	0.362995	0	0	0	0	0	0	0	0	0	0	0	0	0	0	0	0	0	0	0	0
MAG477	d__Bacteria;p__Actinomycetota;c__Acidimicrobiia;o__Acidimicrobiales;f__AC-14;g__CADCTB01;s__Unclassified	Yunnan	0	0	0	0	0	0	0	0	0	0	0	0	0	0	0	0	0	0	0	0	0	0	0	0	0	0	0	0	0	0	0	0	0	0	0	0	0	0	0	0	0	0	0	0	0	0	0
MAG478	d__Bacteria;p__Chloroflexota;c__UBA6077;o__UBA6077;f__CF-72;g__Unclassified;s__Unclassified	Yunnan	0	0	0	0	0	0	0	0	0	0	0	0	0	0	0	0	0	0	0	0	0	0	0	0	0	0	0	0	0	0	0	0	0	0	0	0	0	0	0	0	0	0	0	0	0	0	0
MAG479	d__Bacteria;p__Actinomycetota;c__Actinomycetia;o__Actinomycetales;f__JAJYRW01;g__JAJYRW01;s__Unclassified	Sichuan	0	0	0	0	0	0	0	0	0	0	0	0	0.00661316	0.535796	0.285435	0	0	0	0	0	0.00963836	0	0	0	0.137548	0	0	0	0	0	0	0	0	0	0	0	0	0	0	0	0	0	0	0	0	0	0
MAG48	d__Bacteria;p__Actinomycetota;c__Actinomycetia;o__Actinomycetales;f__Dermabacteraceae;g__Brachybacterium;s__Unclassified	Sichuan	0	0	0.0638039	0	0	0	0	0	0	0	0	0	0.0297161	0.853174	0.0748152	0	0	0.030967	0	0	0.101239	0	0	0.236287	0.120495	0	0	0	0	0	0	0	0	0	0	0	0	0	0	0	0	0	0	0	0	0	0
MAG480	d__Bacteria;p__Patescibacteria;c__Saccharimonadia;o__Saccharimonadales;f__Nanosynbacteraceae;g__Nanosynbacter;s__Unclassified	Sichuan	0	0	0.268436	0	0	0	0	0	0	0	0	0	0	0	0	0	0	0	0	0	0	0	0	0	0	0	0	0	0	0	0	0	0	0	0	0	0	0	0	0	0	0	0	0	0	0	0
MAG481	d__Bacteria;p__Bacteroidota;c__Bacteroidia;o__Cytophagales;f__Spirosomaceae;g__Spirosoma;s__Unclassified	Sichuan	0	0	0	0	0	0	0	0.135452	0.264675	0	0.23875	0	0	0	1.00588	0	1.67216	0	0	0.0869925	0	0.134035	0	0	0	0	0	0	0	0	0	0	0	0	0	0	0	0	0	0	0	0	0	0	0	0	0
MAG482	d__Bacteria;p__Acidobacteriota;c__Blastocatellia;o__Pyrinomonadales;f__Pyrinomonadaceae;g__QHXN01;s__Unclassified	Yunnan	0	0	0	0	0	0	0	0	0	0	0	0	0	0	0	0	0	0	0	0	0	0	0	0	0	0	0	0	0	0	0	0	0	0	0	0	0	0	0	0	0	0	0	0	0	0	0
MAG483	d__Bacteria;p__Actinomycetota;c__Actinomycetia;o__Actinomycetales;f__Microbacteriaceae;g__Agrococcus;s__Unclassified	Sichuan	0	0	0.371864	0	0	0	0	0	0	0	0	0	0	0	0	0	0	0	0	0	0	0	0	0	0	0	0	0	0	0	0	0	0	0	0	0	0	0	0	0	0	0	0	0	0	0	0
MAG484	d__Bacteria;p__Pseudomonadota;c__Gammaproteobacteria;o__Cardiobacteriales;f__Wohlfahrtiimonadaceae;g__Ignatzschineria;s__Unclassified	Sichuan、Yunnan	0	0	0	0	0	0	0	0	0	0	0	0	1.42251	0	0	0	0	1.72533	0	0	0.665284	0	0	0.0190209	0	0	0	0	0	0	0	0	0	0	0	0	0	0	0	0	0	0	0	0	0	0	0
MAG485	d__Bacteria;p__Acidobacteriota;c__Blastocatellia;o__Pyrinomonadales;f__Pyrinomonadaceae;g__PSRF01;s__Unclassified	Jiangsu	0	0	0	0	0	0	0	0	0	0	0	0	0	0	0	0	0	0	0	0	0	0	0	0	0	0	0	0	0	0	0	0	0	0	0	0	0	0	0	0	0	0	0	0	0	0	0
MAG486	d__Bacteria;p__Actinomycetota;c__Thermoleophilia;o__Solirubrobacterales;f__70-9;g__VAYN01;s__Unclassified	Jiangsu	0	0	0	0	0	0	0	0	0	0	0	0	0	0	0	0	0	0	0	0	0	0	0	0	0	0	0	0	0	0	0	0	0	0	0	0	0	0	0	0	0	0	0	0	0	0	0
MAG487	d__Bacteria;p__Dormibacterota;c__Dormibacteria;o__Dormibacterales;f__Dormibacteraceae;g__Unclassified;s__Unclassified	Yunnan	0	0	0	0	0	0	0	0	0	0	0	0	0	0	0	0	0	0	0	0	0	0	0	0	0	0	0	0	0	0	0	0	0	0	0	0	0	0	0	0	0	0	0	0	0	0	0
MAG488	d__Bacteria;p__Gemmatimonadota;c__Gemmatimonadetes;o__Gemmatimonadales;f__Gemmatimonadaceae;g__JABFXC01;s__Unclassified	Yunnan	0	0	0	0	0	0	0	0	0	0	0	0	0	0	0	0	0	0	0	0	0	0	0	0	0	0	0	0	0	0	0	0	0	0	0	0	0	0	0	0	0	0	0	0	0	0	0
MAG489	d__Bacteria;p__Bacteroidota;c__Bacteroidia;o__Sphingobacteriales;f__Sphingobacteriaceae;g__Unclassified;s__Unclassified	Sichuan、Yunnan	0	0	0	0	0	0	0	0	0	0	0	0	0.909705	0.0245328	0.652536	0	0	0.036095	0	0	0.152798	0	0	0.94285	0.171231	0	0	0	0	0	0	0	0	0	0	0	0	0	0	0	0	0	0	0	0	0	0
MAG49	d__Bacteria;p__Pseudomonadota;c__Gammaproteobacteria;o__Steroidobacterales;f__Steroidobacteraceae;g__SCUD01;s__Unclassified	Guizhou、Jiangsu	0	0	0	0	0	0	0	0	0	0	0	0	0	0	0	0	0	0	0	0	0	0	0	0	0	0	0.506885	0	0	0	0	0	0	0	0	0	0	0	0	0	0	0	0	0	0	0	0
MAG490	d__Bacteria;p__Pseudomonadota;c__Alphaproteobacteria;o__Sphingomonadales;f__Sphingomonadaceae;g__Allosphingosinicella;s__Unclassified	Jiangsu	0	0	0	0	0	0	0	0	0	0	0	0	0	0	0	0	0	0	0	0	0	0	0	0	0	0	0	0	0	0	0	0	0	0	0	0	0	0	0	0	0	0	0	0	0	0	0
MAG491	d__Bacteria;p__Bacteroidota;c__Bacteroidia;o__Cytophagales;f__Cyclobacteriaceae;g__Unclassified;s__Unclassified	Sichuan	0	0	0.0682245	0	0	0	0	0	0	0	0	0	0.0247234	1.91069	0.105363	0	0	0	0	0	0	0	0.0455604	0	0	0	0	0	0	0	0	0	0	0	0	0	0	0	0	0	0	0	0	0	0	0	0
MAG492	d__Bacteria;p__Acidobacteriota;c__Thermoanaerobaculia;o__Gp7-AA8;f__Gp7-AA8;g__JAENWF01;s__Unclassified	Yunnan	0	0	0	0	0	0	0	0	0	0	0	0	0	0	0	0	0	0	0	0	0	0	0	0	0	0	0	0	0	0	0	0	0	0	0	0	0	0	0	0	0	0	0	0	0	0	0
MAG493	d__Bacteria;p__Acidobacteriota;c__Thermoanaerobaculia;o__UBA5704;f__UBA5704;g__Unclassified;s__Unclassified	Guizhou、Yunnan、Jiangsu	0	0	0	0	0	0	0	0	0	0	0	0	0	0	0	0	0	0	0	0	0	0	0	0	0	0	0	0	0	0	0.288156	0	0	0	0.577793	0	0	0	0	4.00517	0.155094	0	0	0	0	0	0
MAG494	d__Bacteria;p__Actinomycetota;c__Actinomycetia;o__Actinomycetales;f__Dermatophilaceae;g__Phycicoccus;s__Phycicoccus jejuensis	Sichuan、Yunnan、Jiangsu	0.013707	0	0	0.116221	0	0	0	0.311923	0.146139	0	0	0	0	0	0.0708491	0	0	0	0.0471546	0	0	0.114437	0	0	0	0	0	0	0	0	0	0	0	0	0	0	0	0	0	0	0	0	0	0	0	0	0
MAG495	d__Bacteria;p__Bacteroidota;c__Bacteroidia;o__Chitinophagales;f__Chitinophagaceae;g__JAEWAC01;s__Unclassified	Guizhou、Yunnan、Jiangsu	0	0	0	0	0	0	0	0	0	0	0	0	0	0	0	0	0	0	0	0	0	0	0	0	0	0	0	0	0	0	0.199663	0	0	0	0	0	0	0	0	0	0	0	0	0	0	0.304517	0.345359
MAG496	d__Bacteria;p__Patescibacteria;c__Saccharimonadia;o__Saccharimonadales;f__UBA1020;g__UBA1020;s__Unclassified	Yunnan	0	0	0	0	0	0	0	0	0	0	0	0	0	0	0	0	0	0	0	0	0	0	0	0	0	0	0	0	0	0	0	0	0	0	0	0	0	0	0	0	0	0	0	0	0	0	0
MAG497	d__Bacteria;p__Actinomycetota;c__Actinomycetia;o__Mycobacteriales;f__Jatrophihabitantaceae;g__Jatrophihabitans;s__Unclassified	Yunnan	0	0	0	0	0	0	0	0	0	0	0	0	0	0	0	0	0	0	0	0	0	0	0	0	0	0	0	0	0	0	0	0	0	0	0	0	0	0	0	0	0	0	0	0	0	0	0
MAG498	d__Bacteria;p__Bacillota;c__Bacilli;o__Lactobacillales;f__Lactobacillaceae;g__Limosilactobacillus;s__Limosilactobacillus faecipullorum	Sichuan	0	0	0.0171862	0	0	0	0	0	0	0	0	0	0.133987	0	0.0700601	0	0	0.0130453	0	0	0.462216	0	0.00866899	0.104856	0	0	0	0	0	0	0	0	0	0	0	0	0	0	0	0	0	0	0	0	0	0	0
MAG499	d__Bacteria;p__Pseudomonadota;c__Alphaproteobacteria;o__Caulobacterales;f__Caulobacteraceae;g__Phenylobacterium;s__Unclassified	Jiangsu	0	0	0	0	0	0	0	0	0	0	0	0	0	0	0	0	0	0	0	0	0	0	0	0	0	0	0	0	0	0	0	0	0	0	0	0	0	0	0	0	0	0	0	0	0	0	0
MAG5	d__Bacteria;p__Bacillota;c__Bacilli;o__Staphylococcales;f__Staphylococcaceae;g__Mammaliicoccus;s__Mammaliicoccus lentus	Sichuan、Jiangsu	0.0392824	0	1.4744	0	0	0	0	0.271439	0	0	0	0	0.0150886	0.166767	0.24129	0	0	0.219439	0	0.123279	0.563346	0	0.379563	0.0277198	0.424697	0	0	0	0	0	0	0	0	0	0	0	0	0	0	0	0	0	0	0	0	0	0
MAG50	d__Bacteria;p__Gemmatimonadota;c__Gemmatimonadetes;o__Longimicrobiales;f__Longimicrobiaceae;g__Longimicrobium;s__Unclassified	Yunnan	0	0	0	0	0	0	0	0	0	0	0	0	0	0	0	0	0	0	0	0	0	0	0	0	0	0	0	0	0	0	0	0	0	0	0	0	0	0	0	0	0	0	0	0	0	0	0
MAG500	d__Bacteria;p__Pseudomonadota;c__Gammaproteobacteria;o__Pseudomonadales;f__Cellvibrionaceae;g__Gilvimarinus;s__Unclassified	Sichuan、Yunnan	0	0	0	0	0	0	0	0	0	0	0	0	3.79009	0	0	0	0	0.00961188	0	0	0.0504076	0	0	0	0	0	0	0	0	0	0	0	0	0	0	0	0	0	0	0	0	0	0	0	0	0	0
MAG501	d__Bacteria;p__Bacteroidota;c__Bacteroidia;o__Sphingobacteriales;f__Sphingobacteriaceae;g__Unclassified;s__Unclassified	Sichuan、Yunnan	0	0	0	0	0	0	0	0	0	0	0	0	1.5148	0	0.327941	0	0	0.0626493	0	0	0.210564	0	0	0.493388	0.112907	0	0	0	0	0	0	0	0	0	0	0	0	0	0	0	0	0	0	0	0	0	0
MAG502	d__Bacteria;p__Actinomycetota;c__Actinomycetia;o__Streptosporangiales;f__Streptosporangiaceae;g__Nocardiopsis;s__Nocardiopsis listeri_A	Sichuan、Jiangsu	0	0	0.0657894	0	0	0	0	0.322991	0	0	0	0	0.0218484	3.25199	0.214309	0	0	0.0325233	0	0	0.0894992	0.0567782	0.0120404	0.0116732	0.578354	0	0	0	0	0	0	0	0	0	0	0	0	0	0	0	0	0	0	0	0	0	0
MAG503	d__Bacteria;p__Pseudomonadota;c__Gammaproteobacteria;o__Burkholderiales;f__Casimicrobiaceae;g__Unclassified;s__Unclassified	Yunnan	0	0	0	0	0	0	0	0	0	0	0	0	0	0	0	0	0	0	0	0	0	0	0	0	0	0	0	0	0	0	0	0	0	0	0	0	0	0	0	0	0	0	0	0	0	0	0
MAG504	d__Bacteria;p__Patescibacteria;c__Microgenomatia;o__Levybacterales;f__UBA12049;g__PRDT01;s__Unclassified	Jiangsu	0	0	0	0	0	0	0	0	0	0	0	0	0	0	0	0	0	0	0	0	0	0	0	0	0	0	0	0	0	0	0	0	0	0	0	0	0	0	0	0	0	0	0	0	0	0	0
MAG505	d__Bacteria;p__Bacteroidota;c__Bacteroidia;o__Sphingobacteriales;f__Sphingobacteriaceae;g__Sphingobacterium;s__Sphingobacterium sp012030425	Sichuan、Guizhou	0.11365	0	0	0	0	0	0	0	0	0	0	0	0	0	0	0	0	0	0.0355625	0	0	0	0.189316	0	0	0	0	0	0	0	0	12.0692	0	0	0	0	0	0	0	0	0.225488	0.311828	0.729542	0	0	0	0
MAG506	d__Bacteria;p__Actinomycetota;c__Actinomycetia;o__Actinomycetales;f__Micrococcaceae;g__Arthrobacter;s__Unclassified	Yunnan	0	0	0	0	0	0	0	0	0	0	0	0	0	0	0	0	0	0	0	0	0	0	0	0	0	0	0	0	0	0	0	0	0	0	0	0	0	0	0	0	0	0	0	0	0	0	0
MAG507	d__Bacteria;p__Pseudomonadota;c__Gammaproteobacteria;o__Enterobacterales;f__Enterobacteriaceae;g__Escherichia;s__Escherichia coli	Sichuan、Jiangsu	0	0	0	0	0	0	0	0	0	0	0	0	0	0	0	0	0	0.201034	0	0	0	0	0	0	0	0	0	0	0	0	0	0	0	0	0	0	0	0	0	0	0	0	0	0	0	0	0
MAG508	d__Bacteria;p__Actinomycetota;c__Actinomycetia;o__Mycobacteriales;f__Mycobacteriaceae;g__Corynebacterium;s__Unclassified	Sichuan	0	0	0.0238318	0	0	0	0	0	0	0	0	0	0.230617	0.0127817	0.242109	0	0	0.346187	0	0	0.347215	0	0.026018	0.582323	0.124744	0	0	0	0	0	0	0	0	0	0	0	0	0	0	0	0	0	0	0	0	0	0
MAG509	d__Bacteria;p__Actinomycetota;c__Actinomycetia;o__JAJZTN01;f__JAJZTN01;g__Unclassified;s__Unclassified	Jiangsu	0	0	0	0	0	0	0	0	0	0	0	0	0	0	0	0	0	0	0	0	0	0	0	0	0	0	0	0	0	0	0	0	0	0	0	0	0	0	0	0	0	0	0	0	0	0	0
MAG51	d__Bacteria;p__Patescibacteria;c__Paceibacteria;o__UBA9983_A;f__UBA2103;g__C7867-001;s__Unclassified	Sichuan	0	0	0	0	0	0	0	0	0	0	0	7.21055	0	0	0	0	0	0	0	0	0	0	0	0	0	0	0	0	0	0	0	0	0	0	0	0	0	0	0	0	0	0	0	0	0	0	0
MAG510	d__Bacteria;p__Pseudomonadota;c__Alphaproteobacteria;o__Rhizobiales;f__Xanthobacteraceae;g__Bradyrhizobium;s__Unclassified	Yunnan	0	0	0	0	0	0	0	0	0	0	0	0	0	0	0	0	0	0	0	0	0	0	0	0	0	0	0	0	0	0	0	0	0	0	0	0	0	0	0	0	0	0	0	0	0	0	0
MAG511	d__Bacteria;p__Actinomycetota;c__Actinomycetia;o__Propionibacteriales;f__Propionibacteriaceae;g__Arachnia;s__Arachnia sp012837465	Sichuan	0.0203157	0	0.615559	0	0	0	0	0	0	0	0	0	0	0.123725	0	0	0	0	0	0	0.0340929	0	0.215462	0	0.101447	0	0	0	0	0	0	0	0	0	0	0	0	0	0	0	0	0	0	0	0	0	0
MAG512	d__Bacteria;p__Myxococcota;c__Myxococcia;o__Myxococcales;f__40CM-4-68-19;g__Unclassified;s__Unclassified	Yunnan	0	0	0	0	0	0	0	0	0	0	0	0	0	0	0	0	0	0	0	0	0	0	0	0	0	0	0	0	0	0	0	0	0	0	0	0	0	0	0	0	0	0	0	0	0	0	0
MAG513	d__Bacteria;p__Bacteroidota;c__Bacteroidia;o__Chitinophagales;f__Chitinophagaceae;g__Flavisolibacter;s__Unclassified	Guizhou、Yunnan	0	0	0	0	0	0	0	0	0	0	0	0	0	0	0	0	0	0	0	0	0	0	0	0	0	0	0	0	1.01952	0	0	0	0	1.71673	0	0.907964	0	0	0.668743	0	0	0	0	0	0	0	0
MAG514	d__Bacteria;p__Bacteroidota;c__Bacteroidia;o__Flavobacteriales;f__Weeksellaceae;g__Moheibacter;s__Unclassified	Sichuan	0.0209359	0	0.625366	0	0	0	0	0	0	0	0	0	0	0	0	0	0	0	0	0	0	0	0.625036	0	0	0	0	0	0	0	0	0	0	0	0	0	0	0	0	0	0	0	0	0	0	0	0
MAG515	d__Bacteria;p__Pseudomonadota;c__Gammaproteobacteria;o__Steroidobacterales;f__Steroidobacteraceae;g__SCUD01;s__Unclassified	Sichuan、Jiangsu	0	0.228975	0	0.0980363	2.39503	0.101407	0.771217	0	0.255985	1.98436	0	0.0992859	0	0	0.0603618	3.77814	0	0	0	1.57025	0	0.402983	0	0	0.554203	0	0	0	0	0	0	0	0	0	0	0	0	0	0	0	0	0	0	0	0	0	0
MAG516	d__Bacteria;p__Pseudomonadota;c__Gammaproteobacteria;o__Diplorickettsiales;f__Diplorickettsiaceae;g__Aquirickettsiella;s__Unclassified	Sichuan	0	0.0908834	0	2.00828	0.132421	1.2797	3.14048	0.0844886	0.899616	0.51519	0.230686	0	0	0	0.0679536	0.266373	0	0	0	0.16833	0	0	0	0	2.10381	0	0	0	0	0	0	0	0	0	0	0	0	0	0	0	0	0	0	0	0	0	0
MAG517	d__Bacteria;p__Bacillota;c__Bacilli;o__Lactobacillales;f__Aerococcaceae;g__Fundicoccus;s__Unclassified	Sichuan、Yunnan	0.230658	0	0.0810899	0	0	0	0	0	0	0	0	0	1.78468	0	0.0707303	0	0	0.793279	0	0	2.70895	0	0.0798269	1.14387	0	0	0	0	0	0	0	0	0	0	0	0	0	0	0	0	0	0	0	0	0	0	0
MAG518	d__Archaea;p__Thermoproteota;c__Nitrososphaeria;o__Nitrososphaerales;f__Nitrososphaeraceae;g__Nitrosocosmicus;s__Nitrosocosmicus oleophilus	Sichuan、Guizhou、Yunnan、Jiangsu	0	0	0	0	0.316699	0	0.150063	0	0.544427	0.390903	0	0.20286	0	0	0.0687936	0.427102	0	0	0	0.376779	0	0.23446	0	0	0.0841872	0.319845	0.185496	0.553371	0.849396	0.764719	0.692925	0.227644	0.184371	0.494815	0.634404	0.875717	0.428481	0.299573	0.950079	0.914075	0.720128	0.469374	0.315443	0.496155	0.575107	1.33641	0.225512
MAG519	d__Bacteria;p__Pseudomonadota;c__Gammaproteobacteria;o__Burkholderiales;f__Burkholderiaceae;g__Noviherbaspirillum_B;s__Unclassified	Yunnan	0	0	0	0	0	0	0	0	0	0	0	0	0	0	0	0	0	0	0	0	0	0	0	0	0	0	0	0	0	0	0	0	0	0	0	0	0	0	0	0	0	0	0	0	0	0	0
MAG52	d__Bacteria;p__Bacteroidota;c__Bacteroidia;o__Cytophagales;f__Cyclobacteriaceae;g__Chryseolinea;s__Unclassified	Sichuan、Jiangsu	0	0	0	0	0.118751	0	0	0	0	0	0	0	0	0	0	0.114072	0	0	0	0	0	0	0	0	0	0	0	0	0	0	0	0	0	0	0	0	0	0	0	0	0	0	0	0	0	0	0
MAG520	d__Bacteria;p__Acidobacteriota;c__Thermoanaerobaculia;o__UBA5704;f__UBA5704;g__UBA5704;s__Unclassified	Yunnan	0	0	0	0	0	0	0	0	0	0	0	0	0	0	0	0	0	0	0	0	0	0	0	0	0	0	0	0	0	0	0	0	0	0	0	0	0	0	0	0	0	0	0	0	0	0	0
MAG521	d__Bacteria;p__Acidobacteriota;c__Terriglobia;o__Terriglobales;f__Gp1-AA117;g__Angelobacter;s__Unclassified	Jiangsu	0	0	0	0	0	0	0	0	0	0	0	0	0	0	0	0	0	0	0	0	0	0	0	0	0	0	0	0	0	0	0	0	0	0	0	0	0	0	0	0	0	0	0	0	0	0	0
MAG522	d__Bacteria;p__Gemmatimonadota;c__Gemmatimonadetes;o__Gemmatimonadales;f__Gemmatimonadaceae;g__JABFXC01;s__Unclassified	Guizhou、Yunnan	0	0	0	0	0	0	0	0	0	0	0	0	0	0	0	0	0	0	0	0	0	0	0	0	0	0	0	0	0.401296	0	0	0	0	1.90031	0	0.366935	0	0	0.199059	0	0	0	0	0	0	0	0
MAG523	d__Bacteria;p__Actinomycetota;c__Actinomycetia;o__Actinomycetales;f__Cellulomonadaceae;g__Timonella;s__Unclassified	Sichuan、Yunnan	0	0	0.00777923	0	0	0	0	0	0	0	0	0	1.4733	0	0.0830919	0	0	0.438137	0	0	0.720434	0	0	1.40297	0.0706457	0	0	0	0	0	0	0	0	0	0	0	0	0	0	0	0	0	0	0	0	0	0
MAG524	d__Bacteria;p__Acidobacteriota;c__Blastocatellia;o__Pyrinomonadales;f__Pyrinomonadaceae;g__PSRF01;s__Unclassified	Guizhou、Jiangsu	0	0	0	0	0	0	0	0	0	0	0	0	0	0	0	0	0	0	0	0	0	0	0	0	0	0	0	0	0	0	0.319677	1.94504	0.15975	0	0	0	0	0	0	0.11018	0.16007	0	0	0.149094	0	0.740154	0
MAG525	d__Bacteria;p__Actinomycetota;c__Thermoleophilia;o__Solirubrobacterales;f__70-9;g__VRUE01;s__Unclassified	Sichuan	0	0	0	6.80553	0	0	0	0	0	0	0	0	0	0	0	0	0	0	0	0	0	0	0	0	0	0	0	0	0	0	0	0	0	0	0	0	0	0	0	0	0	0	0	0	0	0	0
MAG526	d__Bacteria;p__Pseudomonadota;c__Gammaproteobacteria;o__Burkholderiales;f__SG8-39;g__SCGC-AG-212-J23;s__Unclassified	Yunnan	0	0	0	0	0	0	0	0	0	0	0	0	0	0	0	0	0	0	0	0	0	0	0	0	0	0	0	0	0	0	0	0	0	0	0	0	0	0	0	0	0	0	0	0	0	0	0
MAG527	d__Bacteria;p__Actinomycetota;c__Thermoleophilia;o__Solirubrobacterales;f__70-9;g__Unclassified;s__Unclassified	Guizhou、Jiangsu	0	0	0	0	0	0	0	0	0	0	0	0	0	0	0	0	0	0	0	0	0	0	0	0	0	0	0	0	0	0.274891	0.610864	0.238483	0	0	0	0.21105	0	0.161879	0.188786	0.887132	0.170155	0.420409	0.322032	0	0	0	0.257434
MAG528	d__Bacteria;p__Nitrospirota;c__Nitrospiria;o__Nitrospirales;f__Nitrospiraceae;g__Palsa-1315;s__Unclassified	Sichuan、Guizhou	0	0.216443	0	0.265495	0.293986	0	0.437843	0	3.0489	2.00629	0	0	0	0	0.19862	0.312907	0	0	0	1.14574	0	0.310978	0	0	0.209286	0	0	0	0	0	0	0	0	0	0	0	0.28806	0	0	0	0	0	0	0	0	0	0
MAG529	d__Bacteria;p__Bacteroidota;c__Bacteroidia;o__Chitinophagales;f__Saprospiraceae;g__M3007;s__Unclassified	Sichuan	0	0	0	0	0	0	0	0	0	0	0	0	0	0	0	0	2.13535	0	0	0	0	0	0	0	0	0	0	0	0	0	0	0	0	0	0	0	0	0	0	0	0	0	0	0	0	0	0
MAG53	d__Bacteria;p__Pseudomonadota;c__Gammaproteobacteria;o__Burkholderiales;f__Burkholderiaceae_A;g__Unclassified;s__Unclassified	Sichuan、Guizhou、Yunnan、Jiangsu	0	0	0	0	0.643398	0	0	0	0	0.421162	0	0.211378	0	0	0	1.03142	0	0	0	0.451771	0	0.173313	0	0	0	0	0	0	1.98455	0	0.237884	0	0	0	0	0.526591	0	0	0.812025	0	0	0.182964	0	0	0	0	0
MAG530	d__Bacteria;p__Actinomycetota;c__Actinomycetia;o__Actinomycetales;f__Micrococcaceae;g__Kocuria;s__Kocuria carniphila	Sichuan	0.19805	0	0.282682	0.120451	0.0580196	0	0	0.877797	0	0	0	0	0	0.0197967	0.208969	0	0	0.0134153	0.0771408	0.0846246	0.017606	0.0572434	0.9348	0	0.098891	0	0	0	0	0	0	0	0	0	0	0	0	0	0	0	0	0	0	0	0	0	0
MAG531	d__Bacteria;p__Actinomycetota;c__Actinomycetia;o__Mycobacteriales;f__Mycobacteriaceae;g__Gordonia;s__Gordonia sp012515855	Sichuan	0.0209388	0	0.483398	0	0	0	0	0	0	0	0	0	0	0	0	0	0	0	0	0	0	0	0.0320245	0	0	0	0	0	0	0	0	0	0	0	0	0	0	0	0	0	0	0	0	0	0	0	0
MAG532	d__Bacteria;p__Actinomycetota;c__Thermoleophilia;o__Solirubrobacterales;f__Solirubrobacteraceae;g__Baekduia;s__Unclassified	Sichuan、Yunnan	0	0	0	0	0	0	0	0	0	0	9.13615	0	0	0	0	0	0	0	0	0	0	0	0	0	0	0	0	0	0	0	0	0	0	0	0	0	0	0	0	0	0	0	0	0	0	0	0
MAG533	d__Bacteria;p__Acidobacteriota;c__Thermoanaerobaculia;o__UBA5704;f__UBA5704;g__UBA5704;s__Unclassified	Sichuan、Jiangsu	0	0	0	0	0.117138	0	0	0	0	0	0	0	0	0	0	0.0914026	0	0	0	0	0	0	0	0	0	0	0	0	0	0	0	0	0	0	0	0	0	0	0	0	0	0	0	0	0	0	0
MAG534	d__Bacteria;p__Acidobacteriota;c__HRBIN11;o__JAKEFK01;f__JAKEFK01;g__Unclassified;s__Unclassified	Jiangsu	0	0	0	0	0	0	0	0	0	0	0	0	0	0	0	0	0	0	0	0	0	0	0	0	0	0	0	0	0	0	0	0	0	0	0	0	0	0	0	0	0	0	0	0	0	0	0
MAG535	d__Bacteria;p__Pseudomonadota;c__Alphaproteobacteria;o__Sphingomonadales;f__Sphingomonadaceae;g__Allosphingosinicella;s__Unclassified	Yunnan	0	0	0	0	0	0	0	0	0	0	0	0	0	0	0	0	0	0	0	0	0	0	0	0	0	0	0	0	0	0	0	0	0	0	0	0	0	0	0	0	0	0	0	0	0	0	0
MAG536	d__Bacteria;p__Pseudomonadota;c__Gammaproteobacteria;o__Pseudomonadales;f__Moraxellaceae;g__Acinetobacter;s__Acinetobacter pseudolwoffii	Sichuan、Guizhou、Yunnan、Jiangsu	0.850969	0	0.114472	0	0	0	0	0	0	0	0	0	0.0111259	1.0272	0.283958	0	0	0.938854	0.0307915	0	0.0226116	0.0575584	0.650233	0.0733327	0.107304	0	0	0	0	0	0	0	0	0	0	0	0	0	0	0	0	0	0.0726651	0	0	0	0
MAG537	d__Bacteria;p__Actinomycetota;c__Actinomycetia;o__Actinomycetales;f__Micrococcaceae;g__Glutamicibacter;s__Glutamicibacter arilaitensis	Sichuan	2.77185	0	0.110161	0.834824	0.121618	0.198023	0.210879	0	0	0.0788279	0	0	0	0	0.0925805	0	0	0.0921612	0.646744	0	0.00726469	0	0.10454	0.353378	0.136557	0	0	0	0	0	0	0	0	0	0	0	0	0	0	0	0	0	0	0	0	0	0
MAG538	d__Bacteria;p__Pseudomonadota;c__Gammaproteobacteria;o__Xanthomonadales;f__Xanthomonadaceae;g__Pseudoxanthomonas_A;s__Unclassified	Sichuan、Guizhou	0.0859171	0.17529	0	0.104475	0.129889	0.0497327	0.445664	1.54908	1.05202	1.06988	0	0	0	0	0	0.183619	0	0	0.749261	0	0	0.789921	0	0	0.129937	0.137834	0.495945	0	0	0	0.239699	0.0578563	0	0	0	0	0	0	0	0.107317	0.111019	4.21074	0.117913	0	0	0.187998	0
MAG539	d__Bacteria;p__Actinomycetota;c__Actinomycetia;o__Actinomycetales;f__Micrococcaceae;g__Arthrobacter_D;s__Arthrobacter_D subterraneus	Guizhou、Yunnan、Jiangsu	0	0	0	0	0	0	0	0	0	0	0	0	0	0	0	0	0	0	0	0	0	0	0	0	0	0.196842	0.556029	0	0	0	0	0	0	0	0	0	0	0	0	0	0	0	0	0	0	0	0
MAG54	d__Bacteria;p__Actinomycetota;c__Thermoleophilia;o__Gaiellales;f__Gaiellaceae;g__JACCRW01;s__Unclassified	Guizhou、Yunnan	0	0	0	0	0	0	0	0	0	0	0	0	0	0	0	0	0	0	0	0	0	0	0	0	0	0	0	0	0	0	0	0	0	0.273673	0	0.212497	0	0	0	0	0	0	0	0	0	0	0
MAG540	d__Bacteria;p__Actinomycetota;c__Actinomycetia;o__Actinomycetales;f__Micrococcaceae;g__Arthrobacter_H;s__Arthrobacter_H sp016892645	Sichuan	0.247	0	0	1.03468	0	1.14077	0.192294	0	0	0	0	0	0	0	0	0	0	0	0.181708	0	0	0	0	0	0.140137	0	0	0	0	0	0	0	0	0	0	0	0	0	0	0	0	0	0	0	0	0	0
MAG541	d__Bacteria;p__Pseudomonadota;c__Alphaproteobacteria;o__Rhodobacterales;f__Rhodobacteraceae;g__Paracoccus;s__Unclassified	Sichuan、Jiangsu	0	0	0	0	0	0	0	0.0948762	0	0	0	0	0	0	0.260286	0	0.203055	0	0	0	0	0	0	0	0	0	0	0	0	0	0	0	0	0	0	0	0	0	0	0	0	0	0	0	0	0	0
MAG542	d__Bacteria;p__Pseudomonadota;c__Gammaproteobacteria;o__Burkholderiales;f__Burkholderiaceae_C;g__Paenalcaligenes;s__Unclassified	Sichuan	0	0	0	0	0	0	0	0	0	0	0	0	0.452606	0	0	0	0	0.131214	0	0	0.118907	0	0	0.292448	0	0	0	0	0	0	0	0	0	0	0	0	0	0	0	0	0	0	0	0	0	0	0
MAG543	d__Bacteria;p__Chloroflexota;c__Chloroflexia;o__Chloroflexales;f__Roseiflexaceae;g__JADKFS01;s__Unclassified	Yunnan	0	0	0	0	0	0	0	0	0	0	0	0	0	0	0	0	0	0	0	0	0	0	0	0	0	0	0	0	0	0	0	0	0	0	0	0	0	0	0	0	0	0	0	0	0	0	0
MAG544	d__Bacteria;p__Verrucomicrobiota;c__Verrucomicrobiae;o__Chthoniobacterales;f__Xiphinematobacteraceae;g__PSRL01;s__Unclassified	Sichuan、Jiangsu	0	0	0	0	4.78614	0	0	0	0.0941584	0	0	0	0	0	0	0.810447	0	0	0	0.297296	0	0	0	0	0	0	0	0	0	0	0	0	0	0	0	0	0	0	0	0	0	0	0	0	0	0	0
MAG545	d__Bacteria;p__Pseudomonadota;c__Alphaproteobacteria;o__Sphingomonadales;f__Sphingomonadaceae;g__Allosphingosinicella;s__Unclassified	Yunnan	0	0	0	0	0	0	0	0	0	0	0	0	0	0	0	0	0	0	0	0	0	0	0	0	0	0	0	0	0	0	0	0	0	0	0	0	0	0	0	0	0	0	0	0	0	0	0
MAG546	d__Bacteria;p__Bacteroidota;c__Bacteroidia;o__Chitinophagales;f__Chitinophagaceae;g__Ferruginibacter;s__Unclassified	Sichuan、Guizhou	0	0	0	0	0.119487	0	0.214363	0.618481	0	0.08657	1.78243	0	0	0	0.301487	0.132507	5.06668	0	0.0336993	0	0	0.705286	0	0	0.125001	0	0	0	0	0	0.113526	0	0	0	0	0	0	0	0	0	0	0.139967	0	0	0	0	0
MAG547	d__Bacteria;p__Actinomycetota;c__Actinomycetia;o__Actinomycetales;f__Brevibacteriaceae;g__Brevibacterium;s__Brevibacterium aurantiacum	Sichuan、Jiangsu	0.275036	0	0.423113	0.182409	0	0	0	0.214355	0	0	0	0	0	0.0284485	0	0	0	0.0063028	0.0218981	0	0.131227	0	0.169097	0	0	0	0	0	0	0	0	0	0	0	0	0	0	0	0	0	0	0	0	0	0	0	0
MAG548	d__Bacteria;p__Actinomycetota;c__Thermoleophilia;o__Gaiellales;f__Gaiellaceae;g__PALSA-600;s__Unclassified	Yunnan	0	0	0	0	0	0	0	0	0	0	0	0	0	0	0	0	0	0	0	0	0	0	0	0	0	0	0	0	0	0	0	0	0	0	0	0	0	0	0	0	0	0	0	0	0	0	0
MAG549	d__Bacteria;p__Eremiobacterota;c__Eremiobacteria;o__Baltobacterales;f__Baltobacteraceae;g__Unclassified;s__Unclassified	Jiangsu	0	0	0	0	0	0	0	0	0	0	0	0	0	0	0	0	0	0	0	0	0	0	0	0	0	0	0	0	0	0	0	0	0	0	0	0	0	0	0	0	0	0	0	0	0	0	0
MAG55	d__Bacteria;p__Nitrospirota;c__Nitrospiria;o__Nitrospirales;f__Nitrospiraceae;g__Unclassified;s__Unclassified	Guizhou、Jiangsu	0	0	0	0	0	0	0	0	0	0	0	0	0	0	0	0	0	0	0	0	0	0	0	0	0	0	0	0	0	0.20192	0.16203	0	0.291038	0	0	0	0.194804	0	0	0	0.146358	0	0	0.32871	0.308983	0	0.133694
MAG550	d__Bacteria;p__Acidobacteriota;c__Blastocatellia;o__Pyrinomonadales;f__Pyrinomonadaceae;g__OLB17;s__Unclassified	Yunnan	0	0	0	0	0	0	0	0	0	0	0	0	0	0	0	0	0	0	0	0	0	0	0	0	0	0	0	0	0	0	0	0	0	0	0	0	0	0	0	0	0	0	0	0	0	0	0
MAG551	d__Bacteria;p__Pseudomonadota;c__Alphaproteobacteria;o__Sphingomonadales;f__Sphingomonadaceae;g__Allosphingosinicella;s__Unclassified	Sichuan、Yunnan、Jiangsu	0	0	0	0	0	0	0	0	0	0.0894627	0	0	0	0	0	0	0	0	0	0.0780475	0	0	0	0	0	0	0	0	0	0	0	0	0	0	0	0	0	0	0	0	0	0	0	0	0	0	0
MAG552	d__Bacteria;p__Bacillota;c__Bacilli;o__Staphylococcales;f__Staphylococcaceae;g__Staphylococcus;s__Staphylococcus equorum	Sichuan、Guizhou、Yunnan	1.86623	0	3.04239	1.45586	0.105928	0.122517	0.133948	1.48006	0	0.0865511	0	0	0.0906711	0.048322	1.63909	0	0	4.09071	0.079739	0.257655	2.29419	0.0510704	1.97486	0.395668	2.82236	0	0	0	0	0	0	0	0	0	0	0	0	0	0.174274	0	0	0	0	0	0	0	0
MAG553	d__Bacteria;p__Actinomycetota;c__Actinomycetia;o__Actinomycetales;f__Micrococcaceae;g__Kocuria;s__Unclassified	Sichuan	0.547972	0	0.0591965	0.52693	0	0	0	0.255082	0	0	0	0	0	0	0.092382	0	0	0	0.336084	0	0	0	0.37991	0	0	0	0	0	0	0	0	0	0	0	0	0	0	0	0	0	0	0	0	0	0	0	0
MAG554	d__Bacteria;p__Pseudomonadota;c__Gammaproteobacteria;o__Burkholderiales;f__Burkholderiaceae;g__Telluria;s__Unclassified	Jiangsu	0	0	0	0	0	0	0	0	0	0	0	0	0	0	0	0	0	0	0	0	0	0	0	0	0	0	0	0	0	0	0	0	0	0	0	0	0	0	0	0	0	0	0	0	0	0	0
MAG555	d__Bacteria;p__Nitrospirota;c__Nitrospiria;o__Nitrospirales;f__Nitrospiraceae;g__Nitrospira_F;s__Unclassified	Sichuan、Guizhou	0	0	0	0	0.059882	0	0	0	0	0.260123	0	0	0	0	0	0.0962369	0	0	0	0	0	0	0	0	0	2.71385	2.92357	0.378893	0	0	2.23374	1.51522	0	0	3.76341	0	0	0.395746	0	0.943642	0.265329	2.73155	3.72576	0	0	2.51057	0
MAG556	d__Bacteria;p__Chloroflexota;c__Anaerolineae;o__Anaerolineales;f__EnvOPS12;g__UBA12294;s__Unclassified	Guizhou、Jiangsu	0	0	0	0	0	0	0	0	0	0	0	0	0	0	0	0	0	0	0	0	0	0	0	0	0	0	0	0.145828	0	0	0	0	0	0	0	0	0	0.56273	0	0	0	0	0	0	0	0	0.752309
MAG557	d__Bacteria;p__Acidobacteriota;c__Blastocatellia;o__RBC074;f__RBC074;g__JAFDVL01;s__Unclassified	Yunnan	0	0	0	0	0	0	0	0	0	0	0	0	0	0	0	0	0	0	0	0	0	0	0	0	0	0	0	0	0	0	0	0	0	0	0	0	0	0	0	0	0	0	0	0	0	0	0
MAG558	d__Bacteria;p__Pseudomonadota;c__Alphaproteobacteria;o__Sphingomonadales;f__Sphingomonadaceae;g__Sphingomonas_I;s__Unclassified	Yunnan	0	0	0	0	0	0	0	0	0	0	0	0	0	0	0	0	0	0	0	0	0	0	0	0	0	0	0	0	0	0	0	0	0	0	0	0	0	0	0	0	0	0	0	0	0	0	0
MAG559	d__Bacteria;p__Bacillota;c__Bacilli;o__Lactobacillales;f__Enterococcaceae;g__Enterococcus_I;s__Unclassified	Sichuan	0	0	0	0	0	0	0	0	0	0	0	0	0.466641	0	0	0	0	0.585183	0	0	0.641981	0	0	0.14417	0	0	0	0	0	0	0	0	0	0	0	0	0	0	0	0	0	0	0	0	0	0	0
MAG56	d__Bacteria;p__Nitrospirota;c__Nitrospiria;o__Nitrospirales;f__Nitrospiraceae;g__Nitrospira_F;s__Unclassified	Sichuan、Jiangsu	0	0.178285	0	0.290779	0.11976	0.154788	0.509219	0	0.206581	0.210526	0	0	0	0	0	0.126906	0	0	0	0.149299	0	0	0	0	0.402031	0	0	0	0	0	0	0	0	0	0	0	0	0	0	0	0	0	0	0	0	0	0
MAG560	d__Bacteria;p__Bacteroidota;c__Bacteroidia;o__Chitinophagales;f__Saprospiraceae;g__JADKGY01;s__Unclassified	Guizhou、Jiangsu	0	0	0	0	0	0	0	0	0	0	0	0	0	0	0	0	0	0	0	0	0	0	0	0	0	0	0	0.213775	0	0	0	0	0	0	0	0	0	3.28396	0	0	0.154436	0	0	0	0	0	0
MAG561	d__Bacteria;p__Actinomycetota;c__Actinomycetia;o__Unclassified;f__Unclassified;g__Unclassified;s__Unclassified	Guizhou、Yunnan、Jiangsu	0	0	0	0	0	0	0	0	0	0	0	0	0	0	0	0	0	0	0	0	0	0	0	0	0	0.298624	0.224081	0.22251	0	0.351123	0.203403	0.130885	0.281818	0	0.197065	0.331827	0.146046	0	0.339577	0.26457	0.259947	0.205677	0.137427	0.238244	0.149713	0	0.256912
MAG562	d__Bacteria;p__Actinomycetota;c__Thermoleophilia;o__Gaiellales;f__Gaiellaceae;g__GMQP-bins7;s__Unclassified	Sichuan、Jiangsu	0	0	0	0	1.99188	0	0	0	0.118968	0.68446	0	0	0	0	0.049323	3.18642	0	0	0	1.70622	0	0.47947	0	0	0	0	0	0	0	0	0	0	0	0	0	0	0	0	0	0	0	0	0	0	0	0	0
MAG563	d__Bacteria;p__Actinomycetota;c__Actinomycetia;o__Actinomycetales;f__Microbacteriaceae;g__Curtobacterium;s__Curtobacterium sp002412165	Jiangsu	0	0	0	0	0	0	0	0	0	0	0	0	0	0	0	0	0	0	0	0	0	0	0	0	0	0	0	0	0	0	0	0	0	0	0	0	0	0	0	0	0	0	0	0	0	0	0
MAG564	d__Bacteria;p__Acidobacteriota;c__Terriglobia;o__Bryobacterales;f__Bryobacteraceae;g__Bog-105;s__Unclassified	Jiangsu	0	0	0	0	0	0	0	0	0	0	0	0	0	0	0	0	0	0	0	0	0	0	0	0	0	0	0	0	0	0	0	0	0	0	0	0	0	0	0	0	0	0	0	0	0	0	0
MAG565	d__Bacteria;p__Actinomycetota;c__Actinomycetia;o__Actinomycetales;f__Dermatophilaceae;g__Terrabacter;s__Unclassified	Sichuan、Guizhou、Yunnan、Jiangsu	0.0269311	0.335898	0	1.72963	0.160388	0.548433	3.20523	0	0.728211	0.495875	1.25812	0	0	0	0.262714	0.16144	0.297866	0	0.287164	0.174788	0	0	0	0	1.12086	0	0	0	0	0	0	0	0	0	0	0	0	0	0.279465	0	0	0	0	0	0	0	0
MAG566	d__Bacteria;p__Chloroflexota;c__Limnocylindria;o__Limnocylindrales;f__CSP1-4;g__SPCO01;s__Unclassified	Sichuan、Guizhou、Yunnan、Jiangsu	0	0.262191	0	0	0	0	0	0	0	0	0.167691	0	0	0	0	0	0	0	0	0	0	0	0	0	0	0	0.317799	0	0	0	0	0	0	0	0	0	0	0	0	0	0	0	0	0	0	0	0
MAG567	d__Bacteria;p__Acidobacteriota;c__Blastocatellia;o__Pyrinomonadales;f__Pyrinomonadaceae;g__OLB17;s__Unclassified	Jiangsu	0	0	0	0	0	0	0	0	0	0	0	0	0	0	0	0	0	0	0	0	0	0	0	0	0	0	0	0	0	0	0	0	0	0	0	0	0	0	0	0	0	0	0	0	0	0	0
MAG568	d__Bacteria;p__Patescibacteria;c__Saccharimonadia;o__Saccharimonadales;f__UBA1547;g__Unclassified;s__Unclassified	Yunnan	0	0	0	0	0	0	0	0	0	0	0	0	0	0	0	0	0	0	0	0	0	0	0	0	0	0	0	0	0	0	0	0	0	0	0	0	0	0	0	0	0	0	0	0	0	0	0
MAG569	d__Bacteria;p__Pseudomonadota;c__Gammaproteobacteria;o__Diplorickettsiales;f__Diplorickettsiaceae;g__Aquirickettsiella;s__Unclassified	Sichuan	0	0.136356	0	2.21255	0.167271	1.54635	4.90405	0.116618	1.20369	0.693766	0.290917	0	0	0	0.0826659	0.346823	0	0	0	0.221243	0	0	0	0	2.39547	0	0	0	0	0	0	0	0	0	0	0	0	0	0	0	0	0	0	0	0	0	0
MAG57	d__Bacteria;p__Bacteroidota;c__Bacteroidia;o__Flavobacteriales;f__Weeksellaceae;g__MFBS3-17;s__MFBS3-17 sp014041915	Sichuan	1	0	0	0	0	0.0806002	0.200849	0.064788	0	0.18473	0	0	0	0.554381	0.195825	0	0	0	0.501945	0	0	0.192364	0.353252	0	0	0	0	0	0	0	0	0	0	0	0	0	0	0	0	0	0	0	0	0	0	0	0
MAG570	d__Bacteria;p__Acidobacteriota;c__Blastocatellia;o__Pyrinomonadales;f__Pyrinomonadaceae;g__OLB17;s__Unclassified	Sichuan	0	0.684592	0	0.0904752	0.757906	0.129807	1.09255	0	0.491666	1.11158	0	0.278791	0	0	0.10313	1.06475	0.0607508	0	0	2.06704	0	0.296808	0	0	0.487378	0	0	0	0	0	0	0	0	0	0	0	0	0	0	0	0	0	0	0	0	0	0
MAG571	d__Bacteria;p__Pseudomonadota;c__Gammaproteobacteria;o__Xanthomonadales;f__Xanthomonadaceae;g__JACMKK01;s__Unclassified	Guizhou、Jiangsu	0	0	0	0	0	0	0	0	0	0	0	0	0	0	0	0	0	0	0	0	0	0	0	0	0	0	0	2.20438	0	2.87225	0	0	0	0	0	0	0	0	0	0	0	0	0	0.233906	0	0	2.94384
MAG572	d__Bacteria;p__Actinomycetota;c__Actinomycetia;o__Actinomycetales;f__Microbacteriaceae;g__Leucobacter;s__Unclassified	Sichuan、Guizhou、Yunnan	0	0	0.0280942	0	0	0	0	0	0	0	0	0	0.981765	0.0322072	0.0962332	0	0	0.119256	0	0	0.473135	0	0.0277019	0.824398	0.116166	0	0.103219	0	0	0	0	0	0	0	0	0	0	0	0	0	0	0	0	0	0	0	0
MAG573	d__Bacteria;p__Actinomycetota;c__Actinomycetia;o__Mycobacteriales;f__Mycobacteriaceae;g__Corynebacterium;s__Corynebacterium casei	Sichuan、Yunnan	0	0	5.90308	0	0	0	0	0	0	0	0	0	0.0110464	0.0490297	0.103013	0	0	0.0734412	0	0	0.276261	0	0.161057	0.035233	0.178741	0	0	0	0	0	0	0	0	0	0	0	0	0	0	0	0	0	0	0	0	0	0
MAG574	d__Bacteria;p__Actinomycetota;c__Actinomycetia;o__Actinomycetales;f__Micrococcaceae;g__Enteractinococcus;s__Unclassified	Sichuan	0	0	0	0	0	0	0	0	0	0	0	0	0	0.679721	0	0	0	0	0	0	0.0376027	0	0	0	0	0	0	0	0	0	0	0	0	0	0	0	0	0	0	0	0	0	0	0	0	0	0
MAG575	d__Bacteria;p__Actinomycetota;c__Actinomycetia;o__Mycobacteriales;f__Micromonosporaceae;g__Rhizocola;s__Unclassified	Jiangsu	0	0	0	0	0	0	0	0	0	0	0	0	0	0	0	0	0	0	0	0	0	0	0	0	0	0	0	0	0	0	0	0	0	0	0	0	0	0	0	0	0	0	0	0	0	0	0
MAG576	d__Bacteria;p__Pseudomonadota;c__Alphaproteobacteria;o__Sphingomonadales;f__Sphingomonadaceae;g__Allosphingosinicella;s__Unclassified	Sichuan	0	0	0	0	0	0	0	0	0.344521	0.485282	0	0	0	0	2.80999	0	0	0	0	0.697373	0	0	0	0	0	0	0	0	0	0	0	0	0	0	0	0	0	0	0	0	0	0	0	0	0	0	0
MAG577	d__Archaea;p__Thermoproteota;c__Nitrososphaeria;o__Nitrososphaerales;f__Nitrososphaeraceae;g__Nitrosocosmicus;s__Nitrosocosmicus oleophilus	Sichuan、Guizhou、Yunnan、Jiangsu	0	0	0	0.0564537	0.402129	0.035428	0.171962	0	0.669629	0.478312	0	0.287653	0	0	0.0842521	0.537377	0	0	0	0.483995	0	0.276407	0	0	0.0963319	0.369568	0.211277	0.694612	0.812299	0.898547	1.22766	0.203033	0.255686	0.488123	0.735087	0.804755	0.507793	0.36924	0.852646	1.08718	0.85103	0.459354	0.287972	0.556778	0.691181	0.486368	0.340682
MAG578	d__Bacteria;p__Actinomycetota;c__Actinomycetia;o__Mycobacteriales;f__Mycobacteriaceae;g__Gordonia;s__Unclassified	Sichuan	0.316467	0.0781751	0.311902	0.556472	0	0.0425879	0	0	0	0	0	0	0	0	0	0	0	0	0.575039	0	0	0	0.0333891	0	0	0	0	0	0	0	0	0	0	0	0	0	0	0	0	0	0	0	0	0	0	0	0
MAG579	d__Bacteria;p__Actinomycetota;c__Acidimicrobiia;o__Acidimicrobiales;f__JADJXE01;g__Unclassified;s__Unclassified	Sichuan	0	0	0	0	0.211197	0	0	0	0.569201	1.84602	0	0	0	0	0	0.325205	0	0	0	2.65337	0	0.38311	0	0	0	0	0	0	0	0	0	0	0	0	0	0	0	0	0	0	0	0	0	0	0	0	0
MAG58	d__Bacteria;p__Pseudomonadota;c__Alphaproteobacteria;o__Sphingomonadales;f__Sphingomonadaceae;g__Allosphingosinicella;s__Unclassified	Yunnan	0	0	0	0	0	0	0	0	0	0	0	0	0	0	0	0	0	0	0	0	0	0	0	0	0	0	0	0	0	0	0	0	0	0	0	0	0	0	0	0	0	0	0	0	0	0	0
MAG580	d__Bacteria;p__Actinomycetota;c__Actinomycetia;o__Actinomycetales;f__Dermatophilaceae;g__Kineosphaera;s__Unclassified	Sichuan、Yunnan、Jiangsu	0	0	0	0	0	0	0	0	0	0	0	0	0	0	0	0	0	0	0	0	0	0	0.945726	0	0	0	0	0	0	0	0	0	0	0	0	0	0	0	0	0	0	0	0	0	0	0	0
MAG581	d__Bacteria;p__Gemmatimonadota;c__Gemmatimonadetes;o__Gemmatimonadales;f__Gemmatimonadaceae;g__JABFXC01;s__Unclassified	Guizhou、Yunnan	0	0	0	0	0	0	0	0	0	0	0	0	0	0	0	0	0	0	0	0	0	0	0	0	0	0	0	0	0.400633	0	0	0	0	1.85424	0	0.366741	0	0	0	0	0	0	0	0	0	0	0
MAG582	d__Archaea;p__Thermoproteota;c__Nitrososphaeria;o__Nitrososphaerales;f__Nitrososphaeraceae;g__TH1177;s__Unclassified	Guizhou、Yunnan、Jiangsu	0	0	0	0	0	0	0	0	0	0	0	0	0	0	0	0	0	0	0	0	0	0	0	0	0	0	0	1.21456	0	0.968754	0.230812	0	0.725309	0	0	0.199439	0.823255	0.217593	0.22068	0.132498	0	0	0	0.544296	1.04068	0	1.92512
MAG583	d__Bacteria;p__Bacteroidota;c__Bacteroidia;o__Chitinophagales;f__Chitinophagaceae;g__JAEWAC01;s__Unclassified	Yunnan	0	0	0	0	0	0	0	0	0	0	0	0	0	0	0	0	0	0	0	0	0	0	0	0	0	0	0	0	0	0	0	0	0	0	0	0	0	0	0	0	0	0	0	0	0	0	0
MAG584	d__Bacteria;p__Patescibacteria;c__Saccharimonadia;o__Saccharimonadales;f__UBA1547;g__JAEWBQ01;s__Unclassified	Yunnan	0	0	0	0	0	0	0	0	0	0	0	0	0	0	0	0	0	0	0	0	0	0	0	0	0	0	0	0	0	0	0	0	0	0	0	0	0	0	0	0	0	0	0	0	0	0	0
MAG585	d__Bacteria;p__Bacteroidota;c__Bacteroidia;o__Chitinophagales;f__Chitinophagaceae;g__Segetibacter;s__Unclassified	Yunnan	0	0	0	0	0	0	0	0	0	0	0	0	0	0	0	0	0	0	0	0	0	0	0	0	0	0	0	0	0	0	0	0	0	0	0	0	0	0	0	0	0	0	0	0	0	0	0
MAG586	d__Bacteria;p__Acidobacteriota;c__Terriglobia;o__Bryobacterales;f__Bryobacteraceae;g__Bog-105;s__Unclassified	Jiangsu	0	0	0	0	0	0	0	0	0	0	0	0	0	0	0	0	0	0	0	0	0	0	0	0	0	0	0	0	0	0	0	0	0	0	0	0	0	0	0	0	0	0	0	0	0	0	0
MAG587	d__Bacteria;p__Myxococcota;c__Polyangia;o__Fen-1088;f__Fen-1088;g__FEN-1088;s__Unclassified	Yunnan	0	0	0	0	0	0	0	0	0	0	0	0	0	0	0	0	0	0	0	0	0	0	0	0	0	0	0	0	0	0	0	0	0	0	0	0	0	0	0	0	0	0	0	0	0	0	0
MAG588	d__Bacteria;p__Pseudomonadota;c__Gammaproteobacteria;o__Xanthomonadales;f__Xanthomonadaceae;g__JABFWF01;s__Unclassified	Jiangsu	0	0	0	0	0	0	0	0	0	0	0	0	0	0	0	0	0	0	0	0	0	0	0	0	0	0	0	0	0	0	0	0	0	0	0	0	0	0	0	0	0	0	0	0	0	0	0
MAG589	d__Bacteria;p__Acidobacteriota;c__Vicinamibacteria;o__Vicinamibacterales;f__UBA2999;g__JAMQPK01;s__Unclassified	Yunnan	0	0	0	0	0	0	0	0	0	0	0	0	0	0	0	0	0	0	0	0	0	0	0	0	0	0	0	0	0	0	0	0	0	0	0	0	0	0	0	0	0	0	0	0	0	0	0
MAG59	d__Bacteria;p__Acidobacteriota;c__Blastocatellia;o__Pyrinomonadales;f__Pyrinomonadaceae;g__OLB17;s__Unclassified	Jiangsu	0	0	0	0	0	0	0	0	0	0	0	0	0	0	0	0	0	0	0	0	0	0	0	0	0	0	0	0	0	0	0	0	0	0	0	0	0	0	0	0	0	0	0	0	0	0	0
MAG590	d__Bacteria;p__Patescibacteria;c__Saccharimonadia;o__Saccharimonadales;f__UBA1547;g__JALRBM01;s__Unclassified	Yunnan	0	0	0	0	0	0	0	0	0	0	0	0	0	0	0	0	0	0	0	0	0	0	0	0	0	0	0	0	0	0	0	0	0	0	0	0	0	0	0	0	0	0	0	0	0	0	0
MAG591	d__Bacteria;p__Bacteroidota;c__Bacteroidia;o__Chitinophagales;f__Saprospiraceae;g__JADKGY01;s__Unclassified	Jiangsu	0	0	0	0	0	0	0	0	0	0	0	0	0	0	0	0	0	0	0	0	0	0	0	0	0	0	0	0	0	0	0	0	0	0	0	0	0	0	0	0	0	0	0	0	0	0	0
MAG592	d__Bacteria;p__Bacteroidota;c__Bacteroidia;o__Sphingobacteriales;f__Sphingobacteriaceae;g__Sphingobacterium;s__Unclassified	Sichuan	0	0	0.0562557	0	0	0	0	0	0	0.146591	0	0	0.0343913	0.0829739	0.106111	0	0	0.0536814	0	0	0.0953691	0	0	0.289061	1.42924	0	0	0	0	0	0	0	0	0	0	0	0	0	0	0	0	0	0	0	0	0	0
MAG593	d__Bacteria;p__Pseudomonadota;c__Alphaproteobacteria;o__Rhizobiales;f__Xanthobacteraceae;g__Pseudolabrys;s__Unclassified	Sichuan、Yunnan、Jiangsu	0	0	0	0.092981	0	0.0990669	0	0	0	0	0	0	0	0	0	0	0	0	0	0	0	0	0	0	0	0	0	0	0	0	0	0	0	0	0	0	0	0	0	0	0	0	0	0	0	0	0
MAG594	d__Archaea;p__Thermoproteota;c__Nitrososphaeria;o__Nitrososphaerales;f__Nitrosopumilaceae;g__Nitrosotenuis;s__Nitrosotenuis sp021824845	Jiangsu	0	0	0	0	0	0	0	0	0	0	0	0	0	0	0	0	0	0	0	0	0	0	0	0	0	0	0	0	0	0	0	0	0	0	0	0	0	0	0	0	0	0	0	0	0	0	0
MAG595	d__Bacteria;p__Chloroflexota;c__Chloroflexia;o__Chloroflexales;f__Herpetosiphonaceae;g__LB3-1;s__Unclassified	Yunnan、Jiangsu	0	0	0	0	0	0	0	0	0	0	0	0	0	0	0	0	0	0	0	0	0	0	0	0	0	0	0	0	0	0	0	0	0	0	0	0	0	0	0	0	0	0	0	0	0	0	0
MAG596	d__Bacteria;p__Bacillota;c__Bacilli;o__Lactobacillales;f__Carnobacteriaceae;g__Atopostipes;s__Unclassified	Sichuan、Yunnan	0	0	0.0814235	0	0	0	0	0	0	0	0	0	0.392997	1.02403	0.128252	0	0	0.143911	0	0	0.558267	0	0.0591061	0.32272	0	0	0	0	0	0	0	0	0	0	0	0	0	0	0	0	0	0	0	0	0	0	0
MAG597	d__Bacteria;p__Actinomycetota;c__Actinomycetia;o__Propionibacteriales;f__Propionibacteriaceae;g__Brevilactibacter;s__Brevilactibacter sp014164685	Sichuan、Yunnan、Jiangsu	1.75963	0	3.55633	1.78934	0.100674	0.252987	0	0.49034	0.270043	0	0	0	0	0	0	0	0	0.00465627	3.80163	0.100481	0.0312869	0	1.93393	0	0	0	0	0	0	0	0	0	0	0	0	0	0	0	0	0	0	0	0	0	0	0	0
MAG598	d__Bacteria;p__Bacillota;c__Bacilli;o__Lactobacillales;f__Aerococcaceae;g__Jeotgalibaca;s__Jeotgalibaca porci	Sichuan、Yunnan	1.88147	0	0.126165	0	0	0	0	0.0700827	0	0	0	0	1.88582	0.126535	0.270609	0	0	0.649042	0.101016	0	1.92335	0	1.03046	1.90193	0	0	0	0	0	0	0	0	0	0	0	0	0	0	0	0	0	0	0	0	0	0	0
MAG599	d__Bacteria;p__Cyanobacteriota;c__Cyanobacteriia;o__Cyanobacteriales;f__Microcoleaceae;g__Microcoleus;s__Unclassified	Sichuan、Guizhou、Yunnan、Jiangsu	0	0	0	0	0	0	0	0.0598976	0	0	0	0	0	0	0	0	0	0	0	0	0	0	0	0	0	0	0.0953754	1.15754	0	0.111474	0.767685	1.10702	0.272759	0	0	0.393773	0.192788	1.23192	0.755227	0.0904132	0	0.519346	2.52846	0.181285	0.0916361	3.73257	2.30782
MAG6	d__Bacteria;p__Actinomycetota;c__Actinomycetia;o__Actinomycetales;f__Microbacteriaceae;g__Leucobacter;s__Unclassified	Sichuan	0	0	0	0	0	0	0	0	0	0	0	0	0.160706	0	0	0	0	0.0976216	0	0	0.159676	0	0	0.202946	0	0	0	0	0	0	0	0	0	0	0	0	0	0	0	0	0	0	0	0	0	0	0
MAG60	d__Bacteria;p__Bacillota;c__Bacilli;o__Bacillales;f__Planococcaceae;g__Sporosarcina;s__Unclassified	Sichuan、Yunnan	0	0	0	0	0.113295	0	0	0	0	0	0	0	0.0968409	0	0.261043	0.067576	0	0.235794	0	0	0.14029	0	0	2.77573	0.143034	0	0	0	0	0	0	0	0	0	0	0	0	0	0	0	0	0	0	0	0	0	0
MAG600	d__Bacteria;p__Dormibacterota;c__Dormibacteria;o__CF-121;f__Unclassified;g__Unclassified;s__Unclassified	Yunnan	0	0	0	0	0	0	0	0	0	0	0	0	0	0	0	0	0	0	0	0	0	0	0	0	0	0	0	0	0	0	0	0	0	0	0	0	0	0	0	0	0	0	0	0	0	0	0
MAG601	d__Bacteria;p__Actinomycetota;c__Thermoleophilia;o__Solirubrobacterales;f__Solirubrobacteraceae;g__Conexibacter;s__Unclassified	Guizhou	0	0	0	0	0	0	0	0	0	0	0	0	0	0	0	0	0	0	0	0	0	0	0	0	0	0	9.93595	0	0	0	0	0	0	0	0	0	0	0	0	0	0	0	0	0	0	0	0
MAG602	d__Bacteria;p__Pseudomonadota;c__Alphaproteobacteria;o__Rhizobiales;f__Xanthobacteraceae;g__Bradyrhizobium;s__Unclassified	Yunnan	0	0	0	0	0	0	0	0	0	0	0	0	0	0	0	0	0	0	0	0	0	0	0	0	0	0	0	0	0	0	0	0	0	0	0	0	0	0	0	0	0	0	0	0	0	0	0
MAG603	d__Bacteria;p__Cyanobacteriota;c__Cyanobacteriia;o__Cyanobacteriales;f__Microcoleaceae;g__Microcoleus;s__Unclassified	Guizhou、Yunnan、Jiangsu	0	0	0	0	0	0	0	0	0	0	0	0	0	0	0	0	0	0	0	0	0	0	0	0	0	0	0	1.44023	0	0.127088	0.613217	0.305374	0.537561	0	0	0.464577	0.195848	1.49634	0.57383	0	0	0.241155	0.269453	0.154356	0	1.91455	2.68973
MAG604	d__Bacteria;p__Pseudomonadota;c__Alphaproteobacteria;o__Sphingomonadales;f__Sphingomonadaceae;g__Sphingorhabdus_B;s__Unclassified	Guizhou	0	0	0	0	0	0	0	0	0	0	0	0	0	0	0	0	0	0	0	0	0	0	0	0	0	0	0.131321	0	0	0	0	2.97464	0	0	0	0	0	0	0	0	0	0.465138	1.49409	0	0	0.30393	0
MAG605	d__Bacteria;p__Bacteroidota;c__Bacteroidia;o__Sphingobacteriales;f__Sphingobacteriaceae;g__Sphingobacterium;s__Unclassified	Sichuan、Yunnan	0	0	0	0	0	0	0	0	0	0	0	0	2.25075	0	0	0	0	0.0616219	0	0	0.149908	0	0	0.607259	0	0	0	0	0	0	0	0	0	0	0	0	0	0	0	0	0	0	0	0	0	0	0
MAG606	d__Bacteria;p__Pseudomonadota;c__Gammaproteobacteria;o__Pseudomonadales;f__Moraxellaceae;g__Psychrobacter;s__Psychrobacter faecalis	Sichuan、Guizhou、Yunnan	2.67905	0	2.12231	0	0.247938	0	0	0.824476	0	0.088088	0	0	0.0927888	0.111181	1.06324	0	0	2.52149	0.0334313	0.0811472	1.10728	0.289658	2.74657	3.53127	5.36224	0	0	0	0	0	0	0	0	0	0	0	0	0	0	0	0	0	0	0	0	0	0
MAG607	d__Bacteria;p__Actinomycetota;c__Actinomycetia;o__Mycobacteriales;f__Mycobacteriaceae;g__Dietzia;s__Unclassified	Sichuan	0	0	0.108426	0	0	0	0	0	0	0	0	0	0.0567072	0.291843	0.0735361	0	0	0.041098	0	0	0.125447	0	0.0493635	0.418549	0	0	0	0	0	0	0	0	0	0	0	0	0	0	0	0	0	0	0	0	0	0	0
MAG608	d__Bacteria;p__Gemmatimonadota;c__Gemmatimonadetes;o__Gemmatimonadales;f__Gemmatimonadaceae;g__JABFXC01;s__Unclassified	Yunnan	0	0	0	0	0	0	0	0	0	0	0	0	0	0	0	0	0	0	0	0	0	0	0	0	0	0	0	0	0	0	0	0	0	0	0	0	0	0	0	0	0	0	0	0	0	0	0
MAG609	d__Bacteria;p__Actinomycetota;c__Actinomycetia;o__Mycobacteriales;f__Antricoccaceae;g__Unclassified;s__Unclassified	Sichuan	0	0	0	0	0	0	0	0	0	0	0	0	0	0	0	0	0	0	0	0	0	0	0.631153	0	0	0	0	0	0	0	0	0	0	0	0	0	0	0	0	0	0	0	0	0	0	0	0
MAG61	d__Bacteria;p__Bacteroidota;c__Bacteroidia;o__Flavobacteriales;f__Weeksellaceae;g__Kaistella;s__Kaistella pullorum	Sichuan	0.832856	0.0810725	0	0.0800601	0	0.0710393	0	0.262485	0.12299	0.163152	0.297934	0	0	0.657992	0.353969	0	0.103298	0	0.4683	0	0	0.945066	0.278939	0	0	0	0	0	0	0	0	0	0	0	0	0	0	0	0	0	0	0	0	0	0	0	0
MAG610	d__Bacteria;p__Chloroflexota;c__Chloroflexia;o__Thermomicrobiales;f__UBA6265;g__UBA6265;s__Unclassified	Sichuan	0	0	0.0648795	0	0	0	0	0	0	0	0	0	0	0	0	0	0	0	0	0	0	0	0.603222	0	0	0	0	0	0	0	0	0	0	0	0	0	0	0	0	0	0	0	0	0	0	0	0
MAG611	d__Bacteria;p__Bacillota;c__Bacilli;o__Lactobacillales;f__Aerococcaceae;g__Jeotgalibaca;s__Jeotgalibaca porci	Sichuan、Yunnan	1.25188	0	0.12198	0	0	0	0	0	0	0	0	0	2.27785	0.0777766	0.29628	0	0	0.557466	0.062048	0	1.83309	0	0.818198	2.15128	0	0	0	0	0	0	0	0	0	0	0	0	0	0	0	0	0	0	0	0	0	0	0
MAG612	d__Archaea;p__Thermoproteota;c__Nitrososphaeria;o__Nitrososphaerales;f__Nitrososphaeraceae;g__Nitrosocosmicus;s__Unclassified	Yunnan、Jiangsu	0	0	0	0	0	0	0	0	0	0	0	0	0	0	0	0	0	0	0	0	0	0	0	0	0	0	0	0	0	0	0	0	0	0	0	0	0	0	0	0	0	0	0	0	0	0	0
MAG613	d__Bacteria;p__Actinomycetota;c__Actinomycetia;o__Actinomycetales;f__Microbacteriaceae;g__Microbacterium;s__Unclassified	Sichuan	0.112099	0	0.099929	0	0	0	0	0	0	0	0	0	0	0	0	0	0	0	0.0632341	0	0	0	0.307392	0	0	0	0	0	0	0	0	0	0	0	0	0	0	0	0	0	0	0	0	0	0	0	0
MAG614	d__Bacteria;p__Acidobacteriota;c__Blastocatellia;o__RBC074;f__RBC074;g__Unclassified;s__Unclassified	Guizhou	0	0	0	0	0	0	0	0	0	0	0	0	0	0	0	0	0	0	0	0	0	0	0	0	0	0	0	0	0	0.0881851	0	0	0	0	0	0	0	0.535552	0	0	0	0	0	0	0	0	0.225411
MAG615	d__Bacteria;p__Actinomycetota;c__Actinomycetia;o__Actinomycetales;f__Dermatophilaceae;g__Ornithinicoccus;s__Ornithinicoccus ciconiae	Sichuan、Guizhou、Jiangsu	1.06175	0	0.0890507	0.743656	0.220455	0.0662171	0	0.111039	0.148504	0	0	0	0	0	0.0413153	0.130563	0	0	0.501252	0	0	0	0.338698	0	0.0707151	0	0.486399	0	0	0	0	0	0	0	0	0	0	0	0	0	0	0	0	0	0	0	0
MAG616	d__Bacteria;p__Pseudomonadota;c__Gammaproteobacteria;o__Burkholderiales;f__Burkholderiaceae_B;g__Giesbergeria;s__Unclassified	Sichuan	0.359386	0	0	0.127661	0	0	0	0	0	0	0	0	0	0	0	0	0	0	1.23874	0	0	0	0.0535417	0	0	0	0	0	0	0	0	0	0	0	0	0	0	0	0	0	0	0	0	0	0	0	0
MAG617	d__Bacteria;p__Actinomycetota;c__Actinomycetia;o__Mycobacteriales;f__Mycobacteriaceae;g__Corynebacterium;s__Corynebacterium sp012837295	Sichuan、Yunnan	0.553578	0	1.77092	0.554603	0	0.0426722	0	0.316999	0	0	0	0	0.0117895	0.100941	0.0445908	0	0	0.0223789	0.432031	0.0815325	0.0795035	0	0.744366	0.00567264	0	0	0	0	0	0	0	0	0	0	0	0	0	0	0	0	0	0	0	0	0	0	0
MAG618	d__Bacteria;p__Nitrospirota;c__Nitrospiria;o__Nitrospirales;f__Nitrospiraceae;g__Nitrospira_C;s__Unclassified	Guizhou、Jiangsu	0	0	0	0	0	0	0	0	0	0	0	0	0	0	0	0	0	0	0	0	0	0	0	0	0	0	0	0	0	0.214717	0.190246	0	0.238478	0	0	0	0.16404	0	0	0	0.172562	0	0	0.265662	0.238903	0	0.167231
MAG619	d__Bacteria;p__Pseudomonadota;c__Gammaproteobacteria;o__Burkholderiales;f__Burkholderiaceae_B;g__Ramlibacter;s__Unclassified	Jiangsu	0	0	0	0	0	0	0	0	0	0	0	0	0	0	0	0	0	0	0	0	0	0	0	0	0	0	0	0	0	0	0	0	0	0	0	0	0	0	0	0	0	0	0	0	0	0	0
MAG62	d__Bacteria;p__Actinomycetota;c__Actinomycetia;o__Actinomycetales;f__Micrococcaceae;g__Glutamicibacter;s__Glutamicibacter sp004320535	Sichuan、Jiangsu	0.754665	0	0	0.274543	0	0	0	0	0	0	0	0	0	0	0	0	0	0	0.652716	0	0	0	0.0285697	0	0	0	0	0	0	0	0	0	0	0	0	0	0	0	0	0	0	0	0	0	0	0	0
MAG620	d__Bacteria;p__Actinomycetota;c__Thermoleophilia;o__Gaiellales;f__Gaiellaceae;g__JACCRW01;s__Unclassified	Guizhou、Yunnan	0	0	0	0	0	0	0	0	0	0	0	0	0	0	0	0	0	0	0	0	0	0	0	0	0	0	0	0	0	0	0	0	0	0.255086	0	0	0	0	0	0	0	0	0	0	0	0	0
MAG621	d__Bacteria;p__Chloroflexota;c__UBA6077;o__UBA6077;f__CF-72;g__CF-72;s__Unclassified	Yunnan	0	0	0	0	0	0	0	0	0	0	0	0	0	0	0	0	0	0	0	0	0	0	0	0	0	0	0	0	0	0	0	0	0	0	0	0	0	0	0	0	0	0	0	0	0	0	0
MAG622	d__Bacteria;p__Acidobacteriota;c__Vicinamibacteria;o__Vicinamibacterales;f__UBA2999;g__12-FULL-67-14b;s__Unclassified	Yunnan	0	0	0	0	0	0	0	0	0	0	0	0	0	0	0	0	0	0	0	0	0	0	0	0	0	0	0	0	0	0	0	0	0	0	0	0	0	0	0	0	0	0	0	0	0	0	0
MAG623	d__Bacteria;p__Actinomycetota;c__Actinomycetia;o__Actinomycetales;f__Microbacteriaceae;g__Leucobacter;s__Unclassified	Sichuan	0	0	0.015028	0	0	0	0	0	0	0	0	0	0.243757	0	0	0	0	0.105859	0	0	0.132894	0	0	0.257325	0	0	0	0	0	0	0	0	0	0	0	0	0	0	0	0	0	0	0	0	0	0	0
MAG624	d__Bacteria;p__Acidobacteriota;c__Blastocatellia;o__Pyrinomonadales;f__Pyrinomonadaceae;g__PSRF01;s__Unclassified	Guizhou、Jiangsu	0	0	0	0	0	0	0	0	0	0	0	0	0	0	0	0	0	0	0	0	0	0	0	0	0	0.29601	0.0955573	0.257889	0	0.292715	0.177496	0.255849	1.90855	0	0.319224	0.345856	0.751857	0	0.229282	0	0	1.13086	0.25974	1.36239	1.34678	2.61692	0
MAG625	d__Bacteria;p__Actinomycetota;c__Actinomycetia;o__Propionibacteriales;f__Propionibacteriaceae;g__Brevilactibacter;s__Brevilactibacter sinopodophylli	Sichuan、Guizhou、Jiangsu	0.140628	0	0.174685	0.127759	0	0	0	0	0	0	0	0	0	0	0	0	0	0	0.323758	0	0	0	1.0422	0	0	0	0	0	0	0	0	0	0	0	0	0	0.0872332	0	0	0	0	0	0	0	0	0	0
MAG626	d__Bacteria;p__Pseudomonadota;c__Gammaproteobacteria;o__Burkholderiales;f__Burkholderiaceae_B;g__Comamonas;s__Comamonas sp015478895	Sichuan	0	0	0	0	0	0	0	0	0	0	0	0	0	0.0132291	0	0	0	0	0.0445869	0	0	0	0.381046	0	0	0	0	0	0	0	0	0	0	0	0	0	0	0	0	0	0	0	0	0	0	0	0
MAG627	d__Bacteria;p__Bacillota;c__Bacilli;o__Lactobacillales;f__Enterococcaceae;g__Enterococcus_I;s__Enterococcus_I alcedinis	Sichuan、Yunnan	0	0	0	0	0	0	0	0	0	0	0	0	0.595403	0	0	0	0	0.763649	0	0	0.619087	0	0	0.252256	0	0	0	0	0	0	0	0	0	0	0	0	0	0	0	0	0	0	0	0	0	0	0
MAG628	d__Bacteria;p__Bacillota_A;c__Clostridia;o__Peptostreptococcales;f__Filifactoraceae;g__Acetoanaerobium;s__Unclassified	Sichuan	0	0	0.00744631	0	0	0	0	0.172088	0	0	0	0	0	0	0	0	0	0	0	0	0	0	0.77451	0	0	0	0	0	0	0	0	0	0	0	0	0	0	0	0	0	0	0	0	0	0	0	0
MAG629	d__Bacteria;p__Cyanobacteriota;c__Cyanobacteriia;o__Cyanobacteriales;f__Microcoleaceae;g__Microcoleus;s__Unclassified	Sichuan、Guizhou、Yunnan、Jiangsu	0	0	0	0	0	0	0	0.0976347	0	0	0	0	0	0	0	0	0	0	0.0253099	0	0	0	0	0	0	0	0.132977	4.21471	0	0.243448	0.837873	0.400951	0.404032	0	0	0.414091	0.237956	1.57724	0.571158	0.126349	0	0.385408	0.370925	0.190239	0	2.41471	4.74392
MAG63	d__Bacteria;p__Bacillota_A;c__Clostridia;o__Lachnospirales;f__Lachnospiraceae;g__Mediterraneibacter;s__Mediterraneibacter faecigallinarum	Sichuan	0	0	0	0	0	0	0	0	0	0	0	0	0	0	0	0	0	0.176801	0	0	0.0289443	0	0	0	0	0	0	0	0	0	0	0	0	0	0	0	0	0	0	0	0	0	0	0	0	0	0
MAG630	d__Bacteria;p__Pseudomonadota;c__Gammaproteobacteria;o__Burkholderiales;f__Burkholderiaceae_C;g__Paenalcaligenes;s__Unclassified	Sichuan	0	0	0	0	0	0	0	0	0	0	0	0	0.737912	0	0	0	0	0.036631	0	0	0.0509153	0	0	0.100557	0	0	0	0	0	0	0	0	0	0	0	0	0	0	0	0	0	0	0	0	0	0	0
MAG631	d__Bacteria;p__Sumerlaeota;c__Sumerlaeia;o__Sumerlaeales;f__Sumerlaeaceae;g__Unclassified;s__Unclassified	Sichuan	0	0	0	0	0	0	0	0	0	0	0	0	0	0	0	0	0	0	0	0	0	0	0.370283	0	0	0	0	0	0	0	0	0	0	0	0	0	0	0	0	0	0	0	0	0	0	0	0
MAG632	d__Bacteria;p__Chloroflexota;c__Anaerolineae;o__Promineofilales;f__Promineofilaceae;g__Promineofilum;s__Unclassified	Sichuan	0	0.230624	0	0	0.470457	0	0	0	0.287688	0.37033	0	0	0	0	0.0973021	0.58308	0	0	0	0.543658	0	2.218	0	0	0	0	0	0	0	0	0	0	0	0	0	0	0	0	0	0	0	0	0	0	0	0	0
MAG633	d__Bacteria;p__Pseudomonadota;c__Unclassified;o__Unclassified;f__Unclassified;g__Unclassified;s__Unclassified	Guizhou	0	0	0	0	0	0	0	0	0	0	0	0	0	0	0	0	0	0	0	0	0	0	0	0	0	0.342526	0.098796	0.188701	0.344628	0.296132	0.233755	0.145469	2.69189	0	0.536503	0.367624	1.96838	0	0.33644	0	0	0.221411	0.186911	2.51832	3.06725	0.398682	0
MAG634	d__Bacteria;p__Bacteroidota;c__Bacteroidia;o__Chitinophagales;f__Chitinophagaceae;g__UBA3961;s__Unclassified	Jiangsu	0	0	0	0	0	0	0	0	0	0	0	0	0	0	0	0	0	0	0	0	0	0	0	0	0	0	0	0	0	0	0	0	0	0	0	0	0	0	0	0	0	0	0	0	0	0	0
MAG635	d__Bacteria;p__Pseudomonadota;c__Gammaproteobacteria;o__Steroidobacterales;f__Steroidobacteraceae;g__JADGHX01;s__Unclassified	Yunnan	0	0	0	0	0	0	0	0	0	0	0	0	0	0	0	0	0	0	0	0	0	0	0	0	0	0	0	0	0	0	0	0	0	0	0	0	0	0	0	0	0	0	0	0	0	0	0
MAG636	d__Bacteria;p__Actinomycetota;c__Acidimicrobiia;o__Acidimicrobiales;f__AC-14;g__CADCTB01;s__Unclassified	Yunnan	0	0	0	0	0	0	0	0	0	0	0	0	0	0	0	0	0	0	0	0	0	0	0	0	0	0	0	0	0	0	0	0	0	0	0	0	0	0	0	0	0	0	0	0	0	0	0
MAG637	d__Bacteria;p__Cyanobacteriota;c__Vampirovibrionia;o__Caenarcaniphilales;f__Caenarcanaceae;g__Unclassified;s__Unclassified	Jiangsu	0	0	0	0	0	0	0	0	0	0	0	0	0	0	0	0	0	0	0	0	0	0	0	0	0	0	0	0	0	0	0	0	0	0	0	0	0	0	0	0	0	0	0	0	0	0	0
MAG638	d__Bacteria;p__Bacteroidota;c__Bacteroidia;o__Flavobacteriales;f__Flavobacteriaceae;g__Flavobacterium;s__Unclassified	Sichuan	0	0	0	0	0	0	0	5.60463	0	0	0	0	0	0	0	0	0	0	0	0	0	0	0	0	0	0	0	0	0	0	0	0	0	0	0	0	0	0	0	0	0	0	0	0	0	0	0
MAG639	d__Archaea;p__Thermoproteota;c__Nitrososphaeria;o__Nitrososphaerales;f__Nitrososphaeraceae;g__Nitrososphaera;s__Unclassified	Guizhou、Jiangsu	0	0	0	0	0	0	0	0	0	0	0	0	0	0	0	0	0	0	0	0	0	0	0	0	0	0	0	0	0	0	0	0	0	0	0	0	0	0.761526	0	0	0	0	0	0	0	0	0.0772249
MAG64	d__Bacteria;p__Chloroflexota;c__Chloroflexia;o__Thermomicrobiales;f__UBA6265;g__JAMLHN01;s__Unclassified	Sichuan、Jiangsu	0	0	0	0.126363	0	0	0	0	0	0.156666	0.172225	0	0	0	0.0536412	0	0	0	0	0.174329	0	0	0	0	0	0	0	0	0	0	0	0	0	0	0	0	0	0	0	0	0	0	0	0	0	0	0
MAG640	d__Bacteria;p__Bacillota;c__Bacilli;o__Bacillales;f__Planococcaceae;g__Psychrobacillus;s__Unclassified	Jiangsu	0	0	0	0	0	0	0	0	0	0	0	0	0	0	0	0	0	0	0	0	0	0	0	0	0	0	0	0	0	0	0	0	0	0	0	0	0	0	0	0	0	0	0	0	0	0	0
MAG641	d__Bacteria;p__Bacillota;c__Bacilli;o__Lactobacillales;f__Aerococcaceae;g__Ruoffia;s__Ruoffia sp020112395	Sichuan、Yunnan	0	0	0.323463	0	0	0	0	0	0	0.0916024	0	0	1.47351	0.11109	0.587302	0	0	6.20422	0	0	8.33223	0	0.086672	3.94494	0.373947	0	0	0	0	0	0	0	0	0	0	0	0	0	0	0	0	0	0	0	0	0	0
MAG642	d__Bacteria;p__Patescibacteria;c__Saccharimonadia;o__Saccharimonadales;f__UBA4665;g__Unclassified;s__Unclassified	Sichuan	0	0	0	0	0.0933939	0	0	0.0903572	0	0	0	0	0	0	0	0	0	0	0	0	0	0.110506	0	0	2.88561	0	0	0	0	0	0	0	0	0	0	0	0	0	0	0	0	0	0	0	0	0	0
MAG643	d__Bacteria;p__Pseudomonadota;c__Gammaproteobacteria;o__Xanthomonadales;f__Xanthomonadaceae;g__Unclassified;s__Unclassified	Sichuan	0	0	0	0	0	0	0	0	0	1.10318	0	0	0	0	0	0	0	0	0	3.91847	0	0	0	0	0	0	0	0	0	0	0	0	0	0	0	0	0	0	0	0	0	0	0	0	0	0	0
MAG644	d__Bacteria;p__Pseudomonadota;c__Gammaproteobacteria;o__Pseudomonadales;f__Halomonadaceae;g__Halomonas;s__Unclassified	Sichuan	0	0	0	0	0	0	0	0	0	0	0	0	0.0326692	0.57091	0	0	0	0	0	0	0.00976187	0	0	0	0.348869	0	0	0	0	0	0	0	0	0	0	0	0	0	0	0	0	0	0	0	0	0	0
MAG645	d__Bacteria;p__Actinomycetota;c__Actinomycetia;o__Propionibacteriales;f__Propionibacteriaceae;g__Raineyella;s__Unclassified	Sichuan	1.31496	0	0.05707	1.31934	0	0.105216	0	0.202337	0.167173	0	0	0	0	0	0	0	0	0	6.05147	0	0	0	0.0893056	0	0	0	0	0	0	0	0	0	0	0	0	0	0	0	0	0	0	0	0	0	0	0	0
MAG646	d__Bacteria;p__Bacteroidota;c__Bacteroidia;o__Flavobacteriales;f__Weeksellaceae;g__Planobacterium;s__Unclassified	Sichuan	0.205407	0	0.470536	0	0	0	0	0	0	0	0	0	0	0	0	0	0	0	0	0	0	0	0.0105246	0	0	0	0	0	0	0	0	0	0	0	0	0	0	0	0	0	0	0	0	0	0	0	0
MAG647	d__Bacteria;p__Acidobacteriota;c__Blastocatellia;o__Pyrinomonadales;f__Pyrinomonadaceae;g__PSRF01;s__Unclassified	Guizhou	0	0	0	0	0	0	0	0	0	0	0	0	0	0	0	0	0	0	0	0	0	0	0	0	0	0.210383	0	0.544992	0	0	5.35162	0	0	0	0.175451	0	0	0	0	0.209893	0.246375	0	0.123846	0.163893	0	0	0
MAG648	d__Bacteria;p__Pseudomonadota;c__Alphaproteobacteria;o__Sphingomonadales;f__Sphingomonadaceae;g__Qipengyuania;s__Unclassified	Jiangsu	0	0	0	0	0	0	0	0	0	0	0	0	0	0	0	0	0	0	0	0	0	0	0	0	0	0	0	0	0	0	0	0	0	0	0	0	0	0	0	0	0	0	0	0	0	0	0
MAG649	d__Bacteria;p__Cyanobacteriota;c__Cyanobacteriia;o__Cyanobacteriales;f__Phormidiaceae_A;g__Phormidium_B;s__Unclassified	Guizhou、Jiangsu	0	0	0	0	0	0	0	0	0	0	0	0	0	0	0	0	0	0	0	0	0	0	0	0	0	0	0	0	0	0	0	0	0	0	0	0	0	0.604121	0	0	0	0	0	0	0	0	0
MAG65	d__Bacteria;p__Pseudomonadota;c__Gammaproteobacteria;o__Pseudomonadales;f__Pseudomonadaceae;g__Halopseudomonas;s__Halopseudomonas excrementavium	Sichuan	0	0	0.0277146	0	0	0	0	0	0	0	0	0	0	0.715131	0	0	0	0	0	0	0	0	0	0.0172846	0	0	0	0	0	0	0	0	0	0	0	0	0	0	0	0	0	0	0	0	0	0	0
MAG650	d__Bacteria;p__Gemmatimonadota;c__Gemmatimonadetes;o__Gemmatimonadales;f__GWC2-71-9;g__Unclassified;s__Unclassified	Guizhou	0	0	0	0	0	0	0	0	0	0	0	0	0	0	0	0	0	0	0	0	0	0	0	0	0	0	0	0	0	0.0945047	0.132158	0	0	0	0	0	0	0.469113	0	0	0	0	0	0	0	0	1.15809
MAG651	d__Bacteria;p__Pseudomonadota;c__Unclassified;o__Unclassified;f__Unclassified;g__Unclassified;s__Unclassified	Guizhou、Jiangsu	0	0	0	0	0	0	0	0	0	0	0	0	0	0	0	0	0	0	0	0	0	0	0	0	0	0.229202	0	0	0	0.249957	0.176113	0.109132	1.9408	0	0.327978	0.271594	1.77943	0	0	0	0	0.15293	0.0997644	2.60375	2.64221	0.252542	0
MAG652	d__Bacteria;p__Actinomycetota;c__Actinomycetia;o__Actinomycetales;f__Micrococcaceae;g__Paeniglutamicibacter;s__Unclassified	Sichuan	0	0	0	0	0	0	0	0	0	0	0	0	0.587603	0	0.0636498	0	0	0.465389	0	0	0.166865	0	0	0.681358	0	0	0	0	0	0	0	0	0	0	0	0	0	0	0	0	0	0	0	0	0	0	0
MAG653	d__Bacteria;p__Pseudomonadota;c__Gammaproteobacteria;o__Burkholderiales;f__SG8-39;g__SCGC-AG-212-J23;s__Unclassified	Guizhou、Jiangsu	0	0	0	0	0	0	0	0	0	0	0	0	0	0	0	0	0	0	0	0	0	0	0	0	0	0	0	0	0	0.244228	0.180882	0	2.98493	0	0	0	2.08256	0	0	0	0	0	0	1.93509	2.51898	0	0.0619208
MAG654	d__Bacteria;p__Actinomycetota;c__Thermoleophilia;o__Solirubrobacterales;f__Solirubrobacteraceae;g__Unclassified;s__Unclassified	Yunnan	0	0	0	0	0	0	0	0	0	0	0	0	0	0	0	0	0	0	0	0	0	0	0	0	0	0	0	0	0	0	0	0	0	0	0	0	0	0	0	0	0	0	0	0	0	0	0
MAG655	d__Bacteria;p__Actinomycetota;c__Actinomycetia;o__Actinomycetales;f__Brevibacteriaceae;g__Brevibacterium;s__Brevibacterium aurantiacum	Sichuan	0.453023	0	0.29033	0.268815	0	0.0578067	0	0.184578	0	0	0	0	0	0	0	0	0	0.00627986	0.20453	0	0.0742089	0	0.191494	0	0	0	0	0	0	0	0	0	0	0	0	0	0	0	0	0	0	0	0	0	0	0	0
MAG656	d__Bacteria;p__Acidobacteriota;c__Thermoanaerobaculia;o__UBA5704;f__UBA5704;g__UBA5704;s__Unclassified	Guizhou、Jiangsu	0	0	0	0	0	0	0	0	0	0	0	0	0	0	0	0	0	0	0	0	0	0	0	0	0	0.167666	0.120579	0	0	0	0.2327	0	0	0	0.245117	0	0	0	0	0.241718	0.281226	0	3.39764	0	0	0.355627	0
MAG657	d__Bacteria;p__Actinomycetota;c__Actinomycetia;o__Mycobacteriales;f__Mycobacteriaceae;g__Mycobacterium;s__Unclassified	Yunnan	0	0	0	0	0	0	0	0	0	0	0	0	0	0	0	0	0	0	0	0	0	0	0	0	0	0	0	0	0	0	0	0	0	0	0	0	0	0	0	0	0	0	0	0	0	0	0
MAG658	d__Bacteria;p__Cyanobacteriota;c__Cyanobacteriia;o__Cyanobacteriales;f__Xenococcaceae;g__Waterburya;s__Unclassified	Sichuan、Guizhou	0	0	0	0.10439	0.457289	0	0	2.02257	3.66173	0.216834	0.194126	0	0	0	0.427549	0.0652528	0.355727	0	0	1.04389	0	0.595023	0	0	0	0	0	0	0	0	0	0	0	0	0	0	0	0.208622	0	0	0	0.149413	0.0860682	0	0	0	0
MAG659	d__Bacteria;p__Bacteroidota;c__Bacteroidia;o__Chitinophagales;f__Chitinophagaceae;g__Niabella;s__Niabella sp023423285	Sichuan、Jiangsu	0.0838899	0	0.00808981	0.0954837	0	0.0495201	0	0.171195	0.123723	0	0	0	0	0	0	0	0.0853166	0	0.46185	0	0	0	0.630005	0	0	0	0	0	0	0	0	0	0	0	0	0	0	0	0	0	0	0	0	0	0	0	0
MAG66	d__Bacteria;p__Verrucomicrobiota;c__Verrucomicrobiae;o__Chthoniobacterales;f__UBA10450;g__AV40;s__Unclassified	Yunnan	0	0	0	0	0	0	0	0	0	0	0	0	0	0	0	0	0	0	0	0	0	0	0	0	0	0	0	0	0	0	0	0	0	0	0	0	0	0	0	0	0	0	0	0	0	0	0
MAG660	d__Bacteria;p__Pseudomonadota;c__Alphaproteobacteria;o__Sphingomonadales;f__Sphingomonadaceae;g__Allosphingosinicella;s__Unclassified	Sichuan	0	0	0	0	0	0	0	0	0	0	0	6.03241	0	0	0	0	0	0	0	0	0	0	0	0	0	0	0	0	0	0	0	0	0	0	0	0	0	0	0	0	0	0	0	0	0	0	0
MAG661	d__Bacteria;p__Bacillota;c__Bacilli;o__Exiguobacterales;f__Exiguobacteraceae;g__Exiguobacterium_A;s__Exiguobacterium_A sibiricum	Sichuan、Guizhou	0.00772171	0	0	0	0.188905	0	0	0.10897	0.117229	0.120756	0.289593	0	0	0.453131	0.268328	0	0	0	0.223372	0.0739636	0	0.0991881	0	0	0	0	0	0	0	0	0	0	0	0	0	0	0	0	0	0	0	0	0	0	0	0	0
MAG662	d__Bacteria;p__Pseudomonadota;c__Alphaproteobacteria;o__Sphingomonadales;f__Sphingomonadaceae;g__Sphingomicrobium;s__Unclassified	Yunnan	0	0	0	0	0	0	0	0	0	0	0	0	0	0	0	0	0	0	0	0	0	0	0	0	0	0	0	0	0	0	0	0	0	0	0	0	0	0	0	0	0	0	0	0	0	0	0
MAG663	d__Bacteria;p__CSP1-3;c__CSP1-3;o__CSP1-3;f__13-1-40CM-64-14;g__13-1-40CM-64-14;s__Unclassified	Yunnan	0	0	0	0	0	0	0	0	0	0	0	0	0	0	0	0	0	0	0	0	0	0	0	0	0	0	0	0	0	0	0	0	0	0	0	0	0	0	0	0	0	0	0	0	0	0	0
MAG664	d__Bacteria;p__Actinomycetota;c__Actinomycetia;o__Actinomycetales;f__Dermatophilaceae;g__F2B08;s__Unclassified	Guizhou、Jiangsu	0	0	0	0	0	0	0	0	0	0	0	0	0	0	0	0	0	0	0	0	0	0	0	0	0	0	0.21306	0	0	0	0.234754	0	0	0	0	0	0	0	0	0.163633	0.301451	0	0	0	0	0	0
MAG665	d__Bacteria;p__Actinomycetota;c__Actinomycetia;o__Actinomycetales;f__Dermatophilaceae;g__Ornithinicoccus;s__Unclassified	Sichuan	0.0514992	0	1.49075	0	0.15127	0	0.239197	0.204777	0	0.171988	0	0	0.0328525	0.0307308	0.0963712	0.0628006	0	0.00738709	0	0.214869	0.0730199	0	0.149915	0	0.227136	0	0	0	0	0	0	0	0	0	0	0	0	0	0	0	0	0	0	0	0	0	0
MAG666	d__Bacteria;p__Actinomycetota;c__Actinomycetia;o__Actinomycetales;f__Microbacteriaceae;g__NC76-1;s__Unclassified	Sichuan	0	0	0.0162487	0	0	0	0	0	0	0	0	0	0.219729	0	0	0	0	0.063242	0	0	0.163875	0	0	0.138445	0	0	0	0	0	0	0	0	0	0	0	0	0	0	0	0	0	0	0	0	0	0	0
MAG667	d__Bacteria;p__Bacteroidota;c__Bacteroidia;o__Flavobacteriales;f__Flavobacteriaceae;g__Flavobacterium;s__Unclassified	Sichuan	0	0	0	0	0	0	0	0	0	0	0	0	0.347141	0	0	0	0	0.526157	0	0	0.0395346	0	0	0.0668114	0	0	0	0	0	0	0	0	0	0	0	0	0	0	0	0	0	0	0	0	0	0	0
MAG668	d__Bacteria;p__Bacillota;c__Bacilli;o__Lactobacillales;f__Lactobacillaceae;g__Lactobacillus;s__Lactobacillus pullistercoris	Sichuan、Jiangsu	0.0232042	0	0.006545	0	0	0	0	0	0	0	0	0	0.0725861	0	0.0849612	0	0	0.305438	0	0	0.381279	0	0	0.0994213	0	0	0	0	0	0	0	0	0	0	0	0	0	0	0	0	0	0	0	0	0	0	0
MAG669	d__Bacteria;p__Bacteroidota;c__Bacteroidia;o__Flavobacteriales;f__Flavobacteriaceae;g__Flavobacterium;s__Unclassified	Sichuan、Guizhou	0.423807	0.059378	0	0	0.118848	0	0.422842	0.140587	0.435449	0.237186	0	0	0	0.133588	0	0.0627926	0	0	0.152609	0	0	0.954433	0.288264	0	0.199105	0	0	0	0	0	0	0.231594	0	0	0	0	0	0	0	0	0	1.25337	0.125849	0	0	0	0
MAG67	d__Bacteria;p__Gemmatimonadota;c__Gemmatimonadetes;o__Gemmatimonadales;f__Gemmatimonadaceae;g__Fen-1247;s__Unclassified	Jiangsu	0	0	0	0	0	0	0	0	0	0	0	0	0	0	0	0	0	0	0	0	0	0	0	0	0	0	0	0	0	0	0	0	0	0	0	0	0	0	0	0	0	0	0	0	0	0	0
MAG670	d__Bacteria;p__Actinomycetota;c__Actinomycetia;o__Actinomycetales;f__Micrococcaceae;g__Arthrobacter;s__Arthrobacter oxydans	Sichuan、Guizhou、Yunnan、Jiangsu	0	0	0	0	0.0741126	0	0	0	0	0	0	0	0	0	0	0	0	0	0	0	0	0	0	0	0	1.13709	1.54839	0.267018	0	0.111955	0.268838	0.554119	0	0	0.555143	0	0	0.420776	0	0.402916	0.53091	0	0.24992	0	0	0	0.149476
MAG671	d__Bacteria;p__Acidobacteriota;c__Vicinamibacteria;o__Vicinamibacterales;f__UBA2999;g__12-FULL-67-14b;s__Unclassified	Guizhou、Jiangsu	0	0	0	0	0	0	0	0	0	0	0	0	0	0	0	0	0	0	0	0	0	0	0	0	0	0.128505	0	0.293567	0	0.250939	0.199799	0	0	0	0	0	0	1.14151	0	0	0.269218	0	0	0	0	0	0.107984
MAG672	d__Bacteria;p__Actinomycetota;c__Acidimicrobiia;o__UBA5794;f__ZC4RG35;g__JACZUI01;s__Unclassified	Guizhou、Jiangsu	0	0	0	0	0	0	0	0	0	0	0	0	0	0	0	0	0	0	0	0	0	0	0	0	0	0	0	0	0	0.379082	0	0	0	0	0	0	0	0	0	0	0	0	0	0	0	0	0.140825
MAG673	d__Bacteria;p__Bacillota_A;c__Clostridia;o__Clostridiales;f__Clostridiaceae;g__JG1575;s__Unclassified	Sichuan、Jiangsu	0.0295105	0	0	0	0	0	0	0	0	0	0	0	0	0	0.0566267	0	0.183971	0	0.0574307	0	0	0	0.40919	0	0	0	0	0	0	0	0	0	0	0	0	0	0	0	0	0	0	0	0	0	0	0	0
MAG674	d__Bacteria;p__Actinomycetota;c__Actinomycetia;o__Nanopelagicales;f__CAIYMF01;g__JAFIHG01;s__Unclassified	Sichuan、Guizhou、Yunnan、Jiangsu	0.0185774	5.00505	0	1.22358	1.8394	0.0776963	2.1954	0	1.73197	1.84513	1.39007	0	0	0	0.246777	2.04737	0.055773	0	0.199805	1.72948	0	1.54389	0	0	1.0179	0	0.535351	0	0.286208	0	0.561983	0	0	0	0	0	0	0	0.25575	0.23931	0.120564	0.129529	0	0	0	0	0
MAG675	d__Bacteria;p__Acidobacteriota;c__Terriglobia;o__Bryobacterales;f__Bryobacteraceae;g__TMP-7;s__Unclassified	Yunnan	0	0	0	0	0	0	0	0	0	0	0	0	0	0	0	0	0	0	0	0	0	0	0	0	0	0	0	0	0	0	0	0	0	0	0	0	0	0	0	0	0	0	0	0	0	0	0
MAG676	d__Bacteria;p__Gemmatimonadota;c__Gemmatimonadetes;o__Gemmatimonadales;f__Gemmatimonadaceae;g__JADGGM01;s__Unclassified	Jiangsu	0	0	0	0	0	0	0	0	0	0	0	0	0	0	0	0	0	0	0	0	0	0	0	0	0	0	0	0	0	0	0	0	0	0	0	0	0	0	0	0	0	0	0	0	0	0	0
MAG677	d__Bacteria;p__Acidobacteriota;c__Blastocatellia;o__Pyrinomonadales;f__Pyrinomonadaceae;g__JAFDVJ01;s__Unclassified	Jiangsu	0	0	0	0	0	0	0	0	0	0	0	0	0	0	0	0	0	0	0	0	0	0	0	0	0	0	0	0	0	0	0	0	0	0	0	0	0	0	0	0	0	0	0	0	0	0	0
MAG678	d__Bacteria;p__Bacillota_A;c__Clostridia;o__Clostridiales;f__Clostridiaceae;g__Clostridium;s__Clostridium sp000435835	Yunnan、Jiangsu	0	0	0	0	0	0	0	0	0	0	0	0	0	0	0	0	0	0	0	0	0	0	0	0	0	0	0	0	0	0	0	0	0	0	0	0	0	0	0	0	0	0	0	0	0	0	0
MAG679	d__Bacteria;p__Bacteroidota;c__Bacteroidia;o__Chitinophagales;f__Chitinophagaceae;g__Hanamia;s__Unclassified	Sichuan	0	0	0	0.0940263	0	4.05777	0	0	0	0	0	0	0	0	0	0	0	0	0	0	0	0	0	0	0	0	0	0	0	0	0	0	0	0	0	0	0	0	0	0	0	0	0	0	0	0	0
MAG68	d__Bacteria;p__Actinomycetota;c__Actinomycetia;o__Actinomycetales;f__Dermatophilaceae;g__CAKUSI01;s__Unclassified	Sichuan、Yunnan	0	0	0.0601002	0	0	0	0	0	0	0	0	0	0	0	0	0	0	0	0.0260848	0	0	0	4.15432	0	0	0	0	0	0	0	0	0	0	0	0	0	0	0	0	0	0	0	0	0	0	0	0
MAG680	d__Bacteria;p__Actinomycetota;c__Actinomycetia;o__Actinomycetales;f__Microbacteriaceae;g__Agromyces_B;s__Unclassified	Sichuan、Guizhou	0	0	0	0	0	0	0	0	0.147271	0.271116	0	0	0	0	0	0	0	0	0.022743	0	0	0	0.636011	0	0	0	0	0	0	0	0	0	0	0	0	0	0	0	0	0	0.449853	0	0	0	0	0	0
MAG681	d__Archaea;p__Thermoproteota;c__Nitrososphaeria;o__Nitrososphaerales;f__Nitrososphaeraceae;g__JAFAQB01;s__Unclassified	Yunnan	0	0	0	0	0	0	0	0	0	0	0	0	0	0	0	0	0	0	0	0	0	0	0	0	0	0	0	0	0	0	0	0	0	0	0	0	0	0	0	0	0	0	0	0	0	0	0
MAG682	d__Bacteria;p__Bacteroidota;c__Bacteroidia;o__Chitinophagales;f__Chitinophagaceae;g__VBAS01;s__Unclassified	Jiangsu	0	0	0	0	0	0	0	0	0	0	0	0	0	0	0	0	0	0	0	0	0	0	0	0	0	0	0	0	0	0	0	0	0	0	0	0	0	0	0	0	0	0	0	0	0	0	0
MAG683	d__Bacteria;p__Pseudomonadota;c__Alphaproteobacteria;o__Sphingomonadales;f__Sphingomonadaceae;g__Allosphingosinicella;s__Unclassified	Sichuan、Guizhou	0	5.78844	0	0	0	0	0.635651	0	0	0.343583	0	0	0	0	0	0.0881945	0	0	0	0	0	0	0	0	0.206801	0.283986	0.094665	0	0	0	0	0	0	0	0.172488	0	0	0	0	0	0	0	0	0	0	0	0
MAG684	d__Bacteria;p__Actinomycetota;c__Actinomycetia;o__Actinomycetales;f__Dermabacteraceae;g__Brachybacterium;s__Brachybacterium sp014400405	Sichuan、Yunnan	0.0659752	0	0.212411	0	0	0	0	0.0806677	0	0	0	0	0.0765856	0.0838546	0.590126	0	0	0.514147	0	0	0.990867	0	0.0524169	9.18239	1.14935	0	0	0	0	0	0	0	0	0	0	0	0	0	0	0	0	0	0	0	0	0	0
MAG685	d__Bacteria;p__Deinococcota;c__Deinococci;o__Deinococcales;f__Trueperaceae;g__Unclassified;s__Unclassified	Sichuan	0	0	0	0	0	0	0	0	0	0	0	0	0.39956	0	0.815285	0	0	0.00587654	0	0	0.0287583	0	0.0162069	0	0	0	0	0	0	0	0	0	0	0	0	0	0	0	0	0	0	0	0	0	0	0	0
MAG686	d__Bacteria;p__Chloroflexota;c__Limnocylindria;o__QHBO01;f__QHBO01;g__JACDBZ01;s__Unclassified	Guizhou、Jiangsu	0	0	0	0	0	0	0	0	0	0	0	0	0	0	0	0	0	0	0	0	0	0	0	0	0	1.17823	0.960242	2.02986	0	3.83269	3.57799	0.392811	0.544577	0	0.872675	0	0.246705	0.68087	0	3.32624	3.0782	0.923523	1.86301	0.346862	0.408334	0.127824	1.97032
MAG687	d__Bacteria;p__Acidobacteriota;c__Vicinamibacteria;o__Vicinamibacterales;f__2-12-FULL-66-21;g__JACCXG01;s__Unclassified	Guizhou、Jiangsu	0	0	0	0	0	0	0	0	0	0	0	0	0	0	0	0	0	0	0	0	0	0	0	0	0	0	0	0.938455	0	0	0	0	0	0	0	0	0	1.43246	0	0	0	0	0	0	0	0	0
MAG688	d__Bacteria;p__Pseudomonadota;c__Alphaproteobacteria;o__Sphingomonadales;f__Sphingomonadaceae;g__Sphingorhabdus_B;s__Unclassified	Guizhou	0	0	0	0	0	0	0	0	0	0	0	0	0	0	0	0	0	0	0	0	0	0	0	0	0	0	0.130516	0	0	0	0	1.55984	0	0	0	0	0	0	0	0	0	0.397044	1.78927	0	0	0.274742	0
MAG689	d__Bacteria;p__Bacteroidota;c__Bacteroidia;o__Chitinophagales;f__Chitinophagaceae;g__JAFAEM01;s__Unclassified	Sichuan	0	10.4664	0	0	0	0	0	0	0	0	0	0	0	0	0	0	0	0	0	0	0	0	0	0	0	0	0	0	0	0	0	0	0	0	0	0	0	0	0	0	0	0	0	0	0	0	0
MAG69	d__Bacteria;p__Actinomycetota;c__Thermoleophilia;o__Gaiellales;f__Gaiellaceae;g__GMQP-bins7;s__Unclassified	Guizhou、Jiangsu	0	0	0	0	0	0	0	0	0	0	0	0	0	0	0	0	0	0	0	0	0	0	0	0	0	0.674972	0.374362	0.772022	0	2.19067	0.662923	0.42482	1.81272	0	1.02545	0	0.82321	0	0	0.789306	0.442721	1.51377	1.528	2.1204	2.10218	0.851163	1.80184
MAG690	d__Bacteria;p__Actinomycetota;c__Thermoleophilia;o__Gaiellales;f__Gaiellaceae;g__GMQP-bins7;s__Unclassified	Guizhou、Jiangsu	0	0	0	0	0	0	0	0	0	0	0	0	0	0	0	0	0	0	0	0	0	0	0	0	0	0.752151	0.402623	0.777862	0	1.76078	0.724977	0.45413	1.80836	0	1.0823	0	0.862853	0	0.282601	0.907779	0.507486	2.58416	1.70506	2.24609	2.06012	0.950347	1.43935
MAG691	d__Bacteria;p__Pseudomonadota;c__Gammaproteobacteria;o__Xanthomonadales;f__Xanthomonadaceae;g__Lysobacter;s__Unclassified	Guizhou、Yunnan	0	0	0	0	0	0	0	0	0	0	0	0	0	0	0	0	0	0	0	0	0	0	0	0	0	0.166438	0.17573	0	0.62412	0.37767	0.143158	0	1.47447	0	0	0.25644	0.275242	0	0.344252	0.132047	0	1.11679	0	1.0577	0.845576	6.65905	0
MAG692	d__Bacteria;p__Myxococcota;c__Myxococcia;o__Myxococcales;f__40CM-4-68-19;g__Unclassified;s__Unclassified	Yunnan	0	0	0	0	0	0	0	0	0	0	0	0	0	0	0	0	0	0	0	0	0	0	0	0	0	0	0	0	0	0	0	0	0	0	0	0	0	0	0	0	0	0	0	0	0	0	0
MAG693	d__Bacteria;p__Actinomycetota;c__Actinomycetia;o__Unclassified;f__Unclassified;g__Unclassified;s__Unclassified	Sichuan、Guizhou、Yunnan、Jiangsu	0.0403699	0.478917	0	0.811506	0.83459	0.125354	1.21374	1.34619	3.0207	1.02633	3.53294	0.31891	0	0	0.54247	0.534849	0.307893	0	0.335385	0.785137	0	0.896294	0	0	1.15901	0.385432	0.336873	0	0	0.164159	0.308134	0.227891	0	0	0.23892	0.342768	0	0	0.441501	0.271163	0.312272	0.269528	0.152891	0	0	0	0.0931875
MAG694	d__Bacteria;p__Acidobacteriota;c__Thermoanaerobaculia;o__UBA5704;f__UBA5704;g__UBA5704;s__Unclassified	Yunnan	0	0	0	0	0	0	0	0	0	0	0	0	0	0	0	0	0	0	0	0	0	0	0	0	0	0	0	0	0	0	0	0	0	0	0	0	0	0	0	0	0	0	0	0	0	0	0
MAG695	d__Bacteria;p__Gemmatimonadota;c__Gemmatimonadetes;o__Gemmatimonadales;f__Gemmatimonadaceae;g__UBA4720;s__Unclassified	Sichuan	0	12.4084	0	0	0.300073	0	3.51206	0	0.148312	1.17381	0	0	0	0	0.0519323	0.613112	0	0	0	0.492652	0	0	0	0	0.169611	0	0	0	0	0	0	0	0	0	0	0	0	0	0	0	0	0	0	0	0	0	0
MAG696	d__Bacteria;p__Bacillota;c__Bacilli;o__Lactobacillales;f__Lactobacillaceae;g__Limosilactobacillus;s__Limosilactobacillus sp002299975	Yunnan	0	0	0	0	0	0	0	0	0	0	0	0	0	0	0	0	0	0	0	0	0	0	0	0	0	0	0	0	0	0	0	0	0	0	0	0	0	0	0	0	0	0	0	0	0	0	0
MAG697	d__Bacteria;p__Deinococcota;c__Deinococci;o__Deinococcales;f__Deinococcaceae;g__Deinococcus;s__Unclassified	Sichuan、Jiangsu	0	1.39135	0	0	0	0	0	0.324884	0	0.236097	0.242544	0	0	0	2.38326	0	0.69308	0	0	0.353494	0	0.76527	0	0	0	0	0	0	0	0	0	0	0	0	0	0	0	0	0	0	0	0	0	0	0	0	0
MAG698	d__Bacteria;p__Pseudomonadota;c__Alphaproteobacteria;o__Sphingomonadales;f__Sphingomonadaceae;g__Allosphingosinicella;s__Unclassified	Sichuan	0	0	0	0	0	0	0	0	0	0	0	4.46145	0	0	0	0	0	0	0	0	0	0	0	0	0	0	0	0	0	0	0	0	0	0	0	0	0	0	0	0	0	0	0	0	0	0	0
MAG699	d__Bacteria;p__Pseudomonadota;c__Gammaproteobacteria;o__Burkholderiales;f__Burkholderiaceae;g__Telluria;s__Unclassified	Guizhou	0	0	0	0	0	0	0	0	0	0	0	0	0	0	0	0	0	0	0	0	0	0	0	0	0	0	0	0	0	0	0	10.3437	0	0	0	0	0	0	0	0	0	0	0.153111	0	0	0	0
MAG7	d__Bacteria;p__Acidobacteriota;c__Blastocatellia;o__RBC074;f__RBC074;g__JACPYM01;s__Unclassified	Yunnan	0	0	0	0	0	0	0	0	0	0	0	0	0	0	0	0	0	0	0	0	0	0	0	0	0	0	0	0	0	0	0	0	0	0	0	0	0	0	0	0	0	0	0	0	0	0	0
MAG70	d__Bacteria;p__Bacillota;c__Bacilli;o__Lactobacillales;f__Carnobacteriaceae;g__Atopostipes;s__Unclassified	Sichuan	0	0	0	0	0	0	0	0	0	0	0	0	0.0936913	1.36534	0	0	0	0.0960811	0	0	0.169281	0	0	0.122169	0	0	0	0	0	0	0	0	0	0	0	0	0	0	0	0	0	0	0	0	0	0	0
MAG700	d__Bacteria;p__Pseudomonadota;c__Gammaproteobacteria;o__Xanthomonadales;f__Xanthomonadaceae;g__Lysobacter_G;s__Unclassified	Sichuan、Yunnan	0	0	0	0	0	0	0.45321	0	0.239976	0.15147	0.164187	0	0	0	0	0	0	0	0.0410877	0	0	6.2959	0	0	0.213437	0	0	0	0	0	0	0	0	0	0	0	0	0	0	0	0	0	0	0	0	0	0
MAG701	d__Bacteria;p__Dormibacterota;c__Dormibacteria;o__Dormibacterales;f__Dormibacteraceae;g__CF-161;s__Unclassified	Guizhou、Yunnan	0	0	0	0	0	0	0	0	0	0	0	0	0	0	0	0	0	0	0	0	0	0	0	0	0	0	0	0	0	0	0	0	0	0	0	0	0	0	0	0	0	0	0	0	0	0	0
MAG702	d__Bacteria;p__Bacteroidota;c__Bacteroidia;o__AKYH767-A;f__Unclassified;g__Unclassified;s__Unclassified	Jiangsu	0	0	0	0	0	0	0	0	0	0	0	0	0	0	0	0	0	0	0	0	0	0	0	0	0	0	0	0	0	0	0	0	0	0	0	0	0	0	0	0	0	0	0	0	0	0	0
MAG703	d__Bacteria;p__Patescibacteria;c__Saccharimonadia;o__Saccharimonadales;f__UBA5946;g__Unclassified;s__Unclassified	Yunnan	0	0	0	0	0	0	0	0	0	0	0	0	0	0	0	0	0	0	0	0	0	0	0	0	0	0	0	0	0	0	0	0	0	0	0	0	0	0	0	0	0	0	0	0	0	0	0
MAG704	d__Bacteria;p__Bacteroidota;c__Bacteroidia;o__Chitinophagales;f__Chitinophagaceae;g__JAEWAC01;s__Unclassified	Yunnan	0	0	0	0	0	0	0	0	0	0	0	0	0	0	0	0	0	0	0	0	0	0	0	0	0	0	0	0	0	0	0	0	0	0	0	0	0	0	0	0	0	0	0	0	0	0	0
MAG705	d__Bacteria;p__Nitrospirota;c__Nitrospiria;o__Nitrospirales;f__Nitrospiraceae;g__Nitrospira_F;s__Unclassified	Sichuan、Guizhou、Jiangsu	0	0.227956	0	0	0.267319	0	0	0	0	0.146724	0	0.242152	0	0	0	0.255348	0	0	0	0.138653	0	0	0	0	0.109847	0	0	0	0	0	0	0	0	0	0	0	0	0.352036	0	0	0	0	0	0	0	0	0
MAG706	d__Bacteria;p__Bacteroidota;c__Bacteroidia;o__Chitinophagales;f__Chitinophagaceae;g__Unclassified;s__Unclassified	Sichuan	0	0	0	0	0	1.69044	0	0	0	0	0	0	0	0	0	0	0	0	0	0	0	0	0	0	0	0	0	0	0	0	0	0	0	0	0	0	0	0	0	0	0	0	0	0	0	0	0
MAG707	d__Bacteria;p__Bacillota_A;c__Clostridia;o__Tissierellales;f__Peptoniphilaceae;g__Gallicola;s__Gallicola sp012798975	Sichuan、Yunnan	0.132968	0	0.14498	0.313415	0	0	0	0.193059	0	0	0	0	0	0.0962303	0	0	0	0	0.199742	0	0.020366	0	0.325392	0	0	0	0	0	0	0	0	0	0	0	0	0	0	0	0	0	0	0	0	0	0	0	0
MAG708	d__Bacteria;p__Actinomycetota;c__Actinomycetia;o__Actinomycetales;f__Dermatophilaceae;g__Janibacter;s__Unclassified	Sichuan	0	0	2.46819	0	0	0	0	0.0807061	0	0	0	0	0.00792749	0	0	0	0	0.00503913	0	0	0.184414	0	0.270494	0	0.102028	0	0	0	0	0	0	0	0	0	0	0	0	0	0	0	0	0	0	0	0	0	0
MAG709	d__Bacteria;p__Pseudomonadota;c__Gammaproteobacteria;o__Xanthomonadales;f__Xanthomonadaceae;g__Lysobacter;s__Unclassified	Jiangsu	0	0	0	0	0	0	0	0	0	0	0	0	0	0	0	0	0	0	0	0	0	0	0	0	0	0	0	0	0	0	0	0	0	0	0	0	0	0	0	0	0	0	0	0	0	0	0
MAG71	d__Bacteria;p__Actinomycetota;c__UBA4738;o__CADDZG01;f__WHSQ01;g__Unclassified;s__Unclassified	Yunnan	0	0	0	0	0	0	0	0	0	0	0	0	0	0	0	0	0	0	0	0	0	0	0	0	0	0	0	0	0	0	0	0	0	0	0	0	0	0	0	0	0	0	0	0	0	0	0
MAG710	d__Bacteria;p__Chloroflexota;c__Limnocylindria;o__QHBO01;f__QHBO01;g__JACDBZ01;s__Unclassified	Sichuan	0	0.117379	0	0	2.7627	0	0	0	1.39515	6.11209	0	4.41761	0	0	0.312887	2.9926	0	0	0	6.97502	0	0.685317	0	0	0	0	0	0	0	0	0	0	0	0	0	0	0	0	0	0	0	0	0	0	0	0	0
MAG711	d__Bacteria;p__Pseudomonadota;c__Gammaproteobacteria;o__Burkholderiales;f__Burkholderiaceae_C;g__Advenella;s__Unclassified	Sichuan	0	0	0.187095	0	0	0	0	0	0	0	0	0	0	0	0	0	0	0	0	0	0	0	0	0	0	0	0	0	0	0	0	0	0	0	0	0	0	0	0	0	0	0	0	0	0	0	0
MAG712	d__Bacteria;p__Gemmatimonadota;c__Gemmatimonadetes;o__Longimicrobiales;f__Longimicrobiaceae;g__Longimicrobium;s__Unclassified	Yunnan	0	0	0	0	0	0	0	0	0	0	0	0	0	0	0	0	0	0	0	0	0	0	0	0	0	0	0	0	0	0	0	0	0	0	0	0	0	0	0	0	0	0	0	0	0	0	0
MAG713	d__Bacteria;p__Pseudomonadota;c__Gammaproteobacteria;o__Burkholderiales;f__SG8-39;g__SCGC-AG-212-J23;s__Unclassified	Yunnan	0	0	0	0	0	0	0	0	0	0	0	0	0	0	0	0	0	0	0	0	0	0	0	0	0	0	0	0	0	0	0	0	0	0	0	0	0	0	0	0	0	0	0	0	0	0	0
MAG714	d__Bacteria;p__Pseudomonadota;c__Alphaproteobacteria;o__Rhodobacterales;f__Rhodobacteraceae;g__Paracoccus;s__Unclassified	Sichuan	0.515002	0	0	0.216628	0	0.0450455	0	0.367196	0.159512	0.0731318	0	0	0	0	0.0951932	0	0	0	1.05959	0	0	0.0488696	0.428868	0	0	0	0	0	0	0	0	0	0	0	0	0	0	0	0	0	0	0	0	0	0	0	0
MAG715	d__Bacteria;p__Acidobacteriota;c__Vicinamibacteria;o__Vicinamibacterales;f__UBA2999;g__JAMQPK01;s__Unclassified	Yunnan	0	0	0	0	0	0	0	0	0	0	0	0	0	0	0	0	0	0	0	0	0	0	0	0	0	0	0	0	0	0	0	0	0	0	0	0	0	0	0	0	0	0	0	0	0	0	0
MAG716	d__Bacteria;p__Bacteroidota;c__Bacteroidia;o__Chitinophagales;f__Saprospiraceae;g__JADKGY01;s__Unclassified	Jiangsu	0	0	0	0	0	0	0	0	0	0	0	0	0	0	0	0	0	0	0	0	0	0	0	0	0	0	0	0	0	0	0	0	0	0	0	0	0	0	0	0	0	0	0	0	0	0	0
MAG717	d__Bacteria;p__Actinomycetota;c__Actinomycetia;o__Propionibacteriales;f__Nocardioidaceae;g__Nocardioides;s__Unclassified	Sichuan、Yunnan	0	0	0	0	0	0.0903307	0	0	0	0	0	0	0	0	0	0	0	0	0	0	0	0	0	0	0	0	0	0	0	0	0	0	0	0	0	0	0	0	0	0	0	0	0	0	0	0	0
MAG718	d__Bacteria;p__Bacteroidota;c__Bacteroidia;o__Flavobacteriales;f__Flavobacteriaceae;g__Flavobacterium;s__Flavobacterium viscosum	Sichuan	0.125878	0	0.112536	0	0	0	0	0	0	0	0	0	0	1.49764	0	0	0	0	0.0319033	0	0	0.056113	0.278433	0	0	0	0	0	0	0	0	0	0	0	0	0	0	0	0	0	0	0	0	0	0	0	0
MAG719	d__Bacteria;p__Actinomycetota;c__Thermoleophilia;o__Solirubrobacterales;f__70-9;g__VAYN01;s__Unclassified	Sichuan、Guizhou、Yunnan、Jiangsu	0	0	0	0	0.207143	0.0477864	0.145288	0	0	0.102671	0	3.49943	0	0	0	0.288835	0.0947158	0	0	0.189322	0	0.122712	0	0	0.171031	0	0	0	0	0	0	0	0	0	0	0	0	0.253653	0	0	0	0	0	0	0	0	0
MAG72	d__Bacteria;p__Patescibacteria;c__Saccharimonadia;o__Saccharimonadales;f__UBA5946;g__Unclassified;s__Unclassified	Yunnan	0	0	0	0	0	0	0	0	0	0	0	0	0	0	0	0	0	0	0	0	0	0	0	0	0	0	0	0	0	0	0	0	0	0	0	0	0	0	0	0	0	0	0	0	0	0	0
MAG720	d__Bacteria;p__Patescibacteria;c__Saccharimonadia;o__Saccharimonadales;f__UBA1547;g__UBA6022;s__Unclassified	Sichuan	0	0	0	0	0	2.27301	0	0	0	0	0	0	0	0	0	0	0	0	0	0	0	0	0	0	0	0	0	0	0	0	0	0	0	0	0	0	0	0	0	0	0	0	0	0	0	0	0
MAG721	d__Bacteria;p__Armatimonadota;c__Fimbriimonadia;o__Fimbriimonadales;f__Fimbriimonadaceae;g__55-13;s__55-13 sp023423495	Guizhou、Jiangsu	0	0	0	0	0	0	0	0	0	0	0	0	0	0	0	0	0	0	0	0	0	0	0	0	0	0.239195	0.190088	0.554269	0	0.084628	0.197964	0.0570057	0	0	0	0	0	1.2796	0	0.206907	0.413891	0.166411	0.259759	0	0	0	0
MAG722	d__Bacteria;p__Pseudomonadota;c__Alphaproteobacteria;o__Sphingomonadales;f__Sphingomonadaceae;g__Sphingomicrobium;s__Unclassified	Jiangsu	0	0	0	0	0	0	0	0	0	0	0	0	0	0	0	0	0	0	0	0	0	0	0	0	0	0	0	0	0	0	0	0	0	0	0	0	0	0	0	0	0	0	0	0	0	0	0
MAG723	d__Bacteria;p__Pseudomonadota;c__Gammaproteobacteria;o__Burkholderiales;f__Burkholderiaceae;g__Glomeribacter;s__Unclassified	Yunnan	0	0	0	0	0	0	0	0	0	0	0	0	0	0	0	0	0	0	0	0	0	0	0	0	0	0	0	0	0	0	0	0	0	0	0	0	0	0	0	0	0	0	0	0	0	0	0
MAG724	d__Bacteria;p__Bacillota;c__Bacilli;o__Haloplasmatales;f__Turicibacteraceae;g__Turicibacter;s__Unclassified	Sichuan、Yunnan	0.0522822	0	0	0	0	0	0	0	0	0	0	0	0	0	0	0	0	0.0850391	0	0	0.16458	0	0	0.07955	0	0	0	0	0	0	0	0	0	0	0	0	0	0	0	0	0	0	0	0	0	0	0
MAG725	d__Bacteria;p__Acidobacteriota;c__Terriglobia;o__Terriglobales;f__Acidobacteriaceae;g__Palsa-343;s__Unclassified	Jiangsu	0	0	0	0	0	0	0	0	0	0	0	0	0	0	0	0	0	0	0	0	0	0	0	0	0	0	0	0	0	0	0	0	0	0	0	0	0	0	0	0	0	0	0	0	0	0	0
MAG726	d__Bacteria;p__Chloroflexota;c__Anaerolineae;o__Anaerolineales;f__EnvOPS12;g__UBA12294;s__Unclassified	Guizhou	0	0	0	0	0	0	0	0	0	0	0	0	0	0	0	0	0	0	0	0	0	0	0	0	0	0	0	0	0	0	0	0	0	0	0	0	0	0.283916	0	0	0	0	0	0	0	0	0.477457
MAG727	d__Bacteria;p__Actinomycetota;c__Actinomycetia;o__Actinomycetales;f__Micrococcaceae;g__Glutamicibacter;s__Glutamicibacter soli	Sichuan、Jiangsu	0.356708	0	0	0.211484	0	0	0	0	0	0	0	0	0	0.0148829	0	0	0	0	0.237362	0	0	0	0.0253133	0	0	0	0	0	0	0	0	0	0	0	0	0	0	0	0	0	0	0	0	0	0	0	0
MAG728	d__Bacteria;p__Desulfobacterota_B;c__Binatia;o__UBA9968;f__UBA9968;g__DP-20;s__Unclassified	Guizhou、Yunnan、Jiangsu	0	0	0	0	0	0	0	0	0	0	0	0	0	0	0	0	0	0	0	0	0	0	0	0	0	0.370972	0	0.219134	1.20582	0.201629	0.531098	1.83038	0.487535	0.305057	1.49253	0.733507	0.442493	0.162638	0.462875	0.549373	0.867648	1.57229	1.10277	1.13045	0.647132	2.38889	0.111735
MAG729	d__Bacteria;p__Gemmatimonadota;c__Gemmatimonadetes;o__Gemmatimonadales;f__Gemmatimonadaceae;g__UBA4720;s__Unclassified	Yunnan	0	0	0	0	0	0	0	0	0	0	0	0	0	0	0	0	0	0	0	0	0	0	0	0	0	0	0	0	0	0	0	0	0	0	0	0	0	0	0	0	0	0	0	0	0	0	0
MAG73	d__Bacteria;p__Actinomycetota;c__Actinomycetia;o__Actinomycetales;f__Micrococcaceae;g__Arthrobacter;s__Arthrobacter luteus_A	Sichuan、Guizhou、Yunnan、Jiangsu	0	0	0	0	0.444905	0	0	0	0	0.161527	0	0.260662	0	0	0	0.197443	0	0	0	0	0	0	0	0	0.090311	1.24614	1.34561	0.186044	0	0.136263	1.39332	2.27014	0	0	1.21225	0	0	0.492743	0	2.88341	1.39907	0.139264	0.367179	0	0	0	0
MAG730	d__Bacteria;p__Actinomycetota;c__UBA4738;o__CADDZG01;f__WHSQ01;g__JAHWJK01;s__Unclassified	Jiangsu	0	0	0	0	0	0	0	0	0	0	0	0	0	0	0	0	0	0	0	0	0	0	0	0	0	0	0	0	0	0	0	0	0	0	0	0	0	0	0	0	0	0	0	0	0	0	0
MAG731	d__Bacteria;p__Pseudomonadota;c__Alphaproteobacteria;o__Sphingomonadales;f__Sphingomonadaceae;g__Sphingomicrobium;s__Unclassified	Yunnan	0	0	0	0	0	0	0	0	0	0	0	0	0	0	0	0	0	0	0	0	0	0	0	0	0	0	0	0	0	0	0	0	0	0	0	0	0	0	0	0	0	0	0	0	0	0	0
MAG732	d__Bacteria;p__Pseudomonadota;c__Alphaproteobacteria;o__Sphingomonadales;f__Sphingomonadaceae;g__Sphingomicrobium;s__Unclassified	Jiangsu	0	0	0	0	0	0	0	0	0	0	0	0	0	0	0	0	0	0	0	0	0	0	0	0	0	0	0	0	0	0	0	0	0	0	0	0	0	0	0	0	0	0	0	0	0	0	0
MAG733	d__Bacteria;p__Chloroflexota;c__Limnocylindria;o__QHBO01;f__QHBO01;g__JACDBZ01;s__Unclassified	Sichuan、Guizhou、Jiangsu	0	0	0	0	0.141576	0	0	0	0	0.166725	0	0.11157	0	0	0	0.16644	0	0	0	0.195339	0	0	0	0	0	0	0	0	0	0	0	0	0	0	0	0	0	0	0	0.195799	0	0.0806663	0	0	0	0	0
MAG734	d__Bacteria;p__Patescibacteria;c__Microgenomatia;o__Levybacterales;f__UBA12049;g__PRDT01;s__Unclassified	Jiangsu	0	0	0	0	0	0	0	0	0	0	0	0	0	0	0	0	0	0	0	0	0	0	0	0	0	0	0	0	0	0	0	0	0	0	0	0	0	0	0	0	0	0	0	0	0	0	0
MAG735	d__Bacteria;p__Pseudomonadota;c__Alphaproteobacteria;o__Sphingomonadales;f__Sphingomonadaceae;g__Sphingomicrobium;s__Unclassified	Yunnan	0	0	0	0	0	0	0	0	0	0	0	0	0	0	0	0	0	0	0	0	0	0	0	0	0	0	0	0	0	0	0	0	0	0	0	0	0	0	0	0	0	0	0	0	0	0	0
MAG736	d__Bacteria;p__Chloroflexota;c__UBA6077;o__UBA6077;f__CF-72;g__Unclassified;s__Unclassified	Yunnan	0	0	0	0	0	0	0	0	0	0	0	0	0	0	0	0	0	0	0	0	0	0	0	0	0	0	0	0	0	0	0	0	0	0	0	0	0	0	0	0	0	0	0	0	0	0	0
MAG737	d__Bacteria;p__Desulfobacterota_B;c__Binatia;o__UBA9968;f__UBA9968;g__WHTF01;s__Unclassified	Guizhou、Jiangsu	0	0	0	0	0	0	0	0	0	0	0	0	0	0	0	0	0	0	0	0	0	0	0	0	0	0.577098	0.209799	0.790171	0	0.90955	0.829147	0.14689	1.09073	0	0.93275	0.204878	0.445726	0.736517	0.197058	0.368344	0.522431	0.236906	0.372839	1.6906	1.41296	0.162099	1.03653
MAG738	d__Bacteria;p__Bacteroidota;c__Bacteroidia;o__Sphingobacteriales;f__Sphingobacteriaceae;g__Arcticibacter;s__Arcticibacter pallidicorallinus	Sichuan、Guizhou	0	0	0	0	0	0	0	0	0	0	0	0	0	0.418721	0	0	0	0	0	0	0	0	0.0552738	0	0	0	0	0	0	0	0	0	0	0	0	0	0	0	0	0	0	0.207902	0	0	0	0	0
MAG739	d__Bacteria;p__Pseudomonadota;c__Gammaproteobacteria;o__Burkholderiales;f__SG8-39;g__SCGC-AG-212-J23;s__Unclassified	Guizhou、Jiangsu	0	0	0	0	0	0	0	0	0	0	0	0	0	0	0	0	0	0	0	0	0	0	0	0	0	0	0	0	0	0.227445	0.163399	0	2.75355	0	0	0	1.87112	0	0	0	0	0	0	1.81944	2.8595	0	0.055432
MAG74	d__Bacteria;p__Pseudomonadota;c__Gammaproteobacteria;o__Enterobacterales_A;f__Alteromonadaceae;g__Aliidiomarina;s__Unclassified	Sichuan	0	0	0	0	0	0	0	0	0	0	0	0	0.0273902	0.763808	0	0	0	0	0	0	0.00720189	0	0	0.0134626	0	0	0	0	0	0	0	0	0	0	0	0	0	0	0	0	0	0	0	0	0	0	0
MAG740	d__Bacteria;p__Pseudomonadota;c__Alphaproteobacteria;o__Sphingomonadales;f__Sphingomonadaceae;g__Sphingomicrobium;s__Unclassified	Guizhou、Yunnan、Jiangsu	0	0	0	0	0	0	0	0	0	0	0	0	0	0	0	0	0	0	0	0	0	0	0	0	0	1.21473	0.895732	2.13295	0.508401	2.79504	2.03918	0.130285	0.872548	0	0.780662	0.622026	1.13395	0.623644	0.761587	1.12945	0.704054	1.05327	0.13081	1.52751	0.83763	0.354995	0.412847
MAG741	d__Bacteria;p__Chloroflexota;c__Ktedonobacteria;o__Ktedonobacterales;f__JADMIN01;g__JAKAIY01;s__Unclassified	Jiangsu	0	0	0	0	0	0	0	0	0	0	0	0	0	0	0	0	0	0	0	0	0	0	0	0	0	0	0	0	0	0	0	0	0	0	0	0	0	0	0	0	0	0	0	0	0	0	0
MAG742	d__Bacteria;p__Bacillota;c__Bacilli;o__Erysipelotrichales;f__Erysipelotrichaceae;g__Erysipelothrix;s__Erysipelothrix sp002358955	Sichuan、Yunnan	0	0	0	0	0	0	0	0	0	0	0	0	0.771173	0	0	0	0	0.643945	0	0	2.5277	0	0	0.00907367	0	0	0	0	0	0	0	0	0	0	0	0	0	0	0	0	0	0	0	0	0	0	0
MAG743	d__Bacteria;p__Actinomycetota;c__Thermoleophilia;o__Solirubrobacterales;f__70-9;g__Unclassified;s__Unclassified	Sichuan、Guizhou、Yunnan	0	0	0	0	0	0	0	0	0	0	0	33.4035	0	0	0	0	0	0	0	0	0	0	0	0	0	0	0	0	0	0	0	0	0	0	0	0	0	0	0	0	0	0	0	0	0	0	0
MAG744	d__Bacteria;p__Actinomycetota;c__Actinomycetia;o__Actinomycetales;f__Micrococcaceae;g__Arthrobacter;s__Unclassified	Guizhou、Yunnan、Jiangsu	0	0	0	0	0	0	0	0	0	0	0	0	0	0	0	0	0	0	0	0	0	0	0	0	0	0	0	0	0	0	0	0.585016	0	0	0	0.243639	0	0	0.213741	0.274019	0	0	0.125258	0	0	0	0
MAG745	d__Bacteria;p__Gemmatimonadota;c__Gemmatimonadetes;o__Gemmatimonadales;f__Gemmatimonadaceae;g__Fen-1247;s__Unclassified	Jiangsu	0	0	0	0	0	0	0	0	0	0	0	0	0	0	0	0	0	0	0	0	0	0	0	0	0	0	0	0	0	0	0	0	0	0	0	0	0	0	0	0	0	0	0	0	0	0	0
MAG746	d__Bacteria;p__Patescibacteria;c__Saccharimonadia;o__Saccharimonadales;f__Saccharimonadaceae;g__Saccharimonas;s__Unclassified	Sichuan、Jiangsu	0	0	0	0.0987863	0	0.0794021	0	0	0	0	0	0	0	0	0	0	0	0	1.01789	0	0	0	0	0	0	0	0	0	0	0	0	0	0	0	0	0	0	0	0	0	0	0	0	0	0	0	0
MAG747	d__Bacteria;p__Bacillota;c__Bacilli;o__Lactobacillales;f__Lactobacillaceae;g__Limosilactobacillus;s__Limosilactobacillus oris	Sichuan、Jiangsu	0.0151528	0	0.00540117	0	0	0	0	0	0	0	0	0	0.00907368	0.0105041	0	0	0	0.0752306	0	0	0.353008	0	0	0.0595656	0	0	0	0	0	0	0	0	0	0	0	0	0	0	0	0	0	0	0	0	0	0	0
MAG748	d__Bacteria;p__Bacteroidota;c__Bacteroidia;o__Chitinophagales;f__UBA10324;g__BJGO01;s__Unclassified	Sichuan	0	0	0	0	0	0	0	0	0	0	0	0	0	0	0	0	2.37451	0	0	0	0	0	0	0	0	0	0	0	0	0	0	0	0	0	0	0	0	0	0	0	0	0	0	0	0	0	0
MAG749	d__Bacteria;p__Pseudomonadota;c__Gammaproteobacteria;o__Xanthomonadales;f__Xanthomonadaceae;g__Luteimonas_D;s__Luteimonas_D sp016615955	Sichuan、Yunnan	0.11473	0	0.0999717	0	0	0	0	0.130111	0	0.1418	0	0	0	0.138013	0.117998	0	0	0	0.125002	0.166411	0	0	1.82844	0	0	0	0	0	0	0	0	0	0	0	0	0	0	0	0	0	0	0	0	0	0	0	0
MAG75	d__Bacteria;p__Desulfobacterota_B;c__Binatia;o__UBA9968;f__UBA9968;g__DP-20;s__Unclassified	Guizhou、Yunnan、Jiangsu	0	0	0	0	0	0	0	0	0	0	0	0	0	0	0	0	0	0	0	0	0	0	0	0	0	0.431075	0	0.225307	1.28217	0.215532	0.563656	1.2164	0.532559	0.320787	1.66586	0.774448	0.471147	0.177687	0.497742	0.58269	0.906333	1.69995	1.15916	1.19213	0.710557	3.63243	0.123429
MAG750	d__Bacteria;p__Bacillota;c__Bacilli;o__Bacillales;f__Bacillaceae_H;g__Priestia;s__Priestia megaterium	Sichuan、Guizhou、Jiangsu	0	0	0	0	0	0.081553	0	0	0	0	0.122303	0.0919795	0	0	0.0871233	0	0	0	0	0	0	0	0	0	0.0715785	0.25535	0.296739	0	0	0	0	0	0.117427	0	0.247385	0	0.112557	0	0	0.0996038	0	0	0	0	0.0881423	0	0.194648
MAG751	d__Bacteria;p__Pseudomonadota;c__Gammaproteobacteria;o__Pseudomonadales;f__Spongiibacteraceae;g__Unclassified;s__Unclassified	Jiangsu	0	0	0	0	0	0	0	0	0	0	0	0	0	0	0	0	0	0	0	0	0	0	0	0	0	0	0	0	0	0	0	0	0	0	0	0	0	0	0	0	0	0	0	0	0	0	0
MAG752	d__Bacteria;p__Actinomycetota;c__Acidimicrobiia;o__Acidimicrobiales;f__Ilumatobacteraceae;g__Desertimonas;s__Unclassified	Jiangsu	0	0	0	0	0	0	0	0	0	0	0	0	0	0	0	0	0	0	0	0	0	0	0	0	0	0	0	0	0	0	0	0	0	0	0	0	0	0	0	0	0	0	0	0	0	0	0
MAG753	d__Bacteria;p__Bacteroidota;c__Bacteroidia;o__Flavobacteriales;f__Flavobacteriaceae;g__Flavobacterium;s__Flavobacterium macacae	Sichuan	0	0	0	0	0	0	0	0	0	0	0	0	0	0	0	0	0	0	0	0	0	0	1.43221	0	0	0	0	0	0	0	0	0	0	0	0	0	0	0	0	0	0	0	0	0	0	0	0
MAG754	d__Bacteria;p__Gemmatimonadota;c__Gemmatimonadetes;o__Gemmatimonadales;f__Gemmatimonadaceae;g__UBA4720;s__Unclassified	Yunnan	0	0	0	0	0	0	0	0	0	0	0	0	0	0	0	0	0	0	0	0	0	0	0	0	0	0	0	0	0	0	0	0	0	0	0	0	0	0	0	0	0	0	0	0	0	0	0
MAG755	d__Bacteria;p__Patescibacteria;c__Paceibacteria;o__Moranbacterales;f__UBA1568;g__UBA1568;s__Unclassified	Sichuan	0	0	0	0	0	0	0	0	0	0	0	2.96094	0	0	0	0	0	0	0	0	0	0	0	0	0	0	0	0	0	0	0	0	0	0	0	0	0	0	0	0	0	0	0	0	0	0	0
MAG756	d__Bacteria;p__Gemmatimonadota;c__Gemmatimonadetes;o__Gemmatimonadales;f__Gemmatimonadaceae;g__JABFXC01;s__Unclassified	Guizhou、Yunnan	0	0	0	0	0	0	0	0	0	0	0	0	0	0	0	0	0	0	0	0	0	0	0	0	0	0	0	0	0.389417	0	0	0	0	1.65637	0	0.338435	0	0	0	0	0	0	0	0	0	0	0
MAG757	d__Bacteria;p__Chloroflexota;c__Limnocylindria;o__Limnocylindrales;f__CSP1-4;g__SPCO01;s__Unclassified	Guizhou、Yunnan	0	0	0	0	0	0	0	0	0	0	0	0	0	0	0	0	0	0	0	0	0	0	0	0	0	0	0	0	0	0	0	0	0	0	0	0	0	0	0	0.127096	0.132535	0	0	0	0	0	0
MAG758	d__Bacteria;p__Bacteroidota;c__Bacteroidia;o__Flavobacteriales;f__Weeksellaceae;g__MFBS3-17;s__Unclassified	Sichuan、Guizhou、Jiangsu	0.581456	0	0	0.0584454	0.0803012	0.0680294	0.141754	0.0928589	0	0.0869477	0	0	0	0.184603	0.156535	0	0.0727976	0	0.523501	0	0	0.210137	0.257265	0	0	0	0.574266	0	0	0	0	0	0	0	0	0	0	0	0	0	0	0	0	0	0	0	0
MAG759	d__Bacteria;p__Bacillota;c__Bacilli;o__Staphylococcales;f__Salinicoccaceae;g__Jeotgalicoccus;s__Jeotgalicoccus nanhaiensis	Sichuan、Yunnan	0.0121076	0	0.276525	0	0	0	0	0.176897	0	0	0	0	0.0920652	2.8696	0.106467	0	0	0.397767	0	0	0.477344	0	0.114504	0.219092	0.163181	0	0	0	0	0	0	0	0	0	0	0	0	0	0	0	0	0	0	0	0	0	0
MAG76	d__Bacteria;p__Pseudomonadota;c__Gammaproteobacteria;o__Pseudomonadales;f__Pseudomonadaceae;g__Pseudomonas_E;s__Unclassified	Guizhou	0	0	0	0	0	0	0	0	0	0	0	0	0	0	0	0	0	0	0	0	0	0	0	0	0	0	0	0	0	0	0	9.66995	0	0	0	0	0	0	0	0	0	0	0	0	0	0	0
MAG760	d__Bacteria;p__Acidobacteriota;c__Vicinamibacteria;o__Vicinamibacterales;f__2-12-FULL-66-21;g__JACCXG01;s__Unclassified	Yunnan	0	0	0	0	0	0	0	0	0	0	0	0	0	0	0	0	0	0	0	0	0	0	0	0	0	0	0	0	0	0	0	0	0	0	0	0	0	0	0	0	0	0	0	0	0	0	0
MAG761	d__Bacteria;p__Actinomycetota;c__Actinomycetia;o__Actinomycetales;f__Cellulomonadaceae;g__Cellulosimicrobium;s__Cellulosimicrobium funkei	Sichuan、Guizhou、Jiangsu	0	0	0	0	0	0	0	0	0	0	0.150526	0	0	0	0.0630753	0	0	0	0	0	0	0	0	0	0.121771	0	0.122177	0	0	0	0.162107	0	0	0	0	0	0	0	0	0	0	0	0	0	0	0	0
MAG762	d__Bacteria;p__Actinomycetota;c__Actinomycetia;o__Propionibacteriales;f__Nocardioidaceae;g__Nocardioides;s__Unclassified	Sichuan、Guizhou、Yunnan、Jiangsu	0.0280046	0.743398	0	0.331507	2.08258	0.109093	2.19472	0.468539	1.19872	1.18733	1.91421	0.207688	0	0	0.555235	1.15644	0.223775	0	0.148648	0.902312	0	0.361137	0	0	0.844593	4.19912	3.14808	0.515158	2.29928	0.48457	1.48912	0.402484	0.62443	0.891391	2.49578	4.93152	0.427707	0.520313	5.41344	3.05246	2.53819	0.838041	0.912752	0.430521	0.253693	1.04416	0.234509
MAG763	d__Bacteria;p__Gemmatimonadota;c__Gemmatimonadetes;o__Gemmatimonadales;f__Gemmatimonadaceae;g__JABFXC01;s__Unclassified	Guizhou、Yunnan	0	0	0	0	0	0	0	0	0	0	0	0	0	0	0	0	0	0	0	0	0	0	0	0	0	0	0	0	0.363631	0	0	0	0	1.74086	0	0.333672	0	0	0	0	0	0	0	0	0	0	0
MAG764	d__Bacteria;p__Bacillota;c__Bacilli;o__Staphylococcales;f__Salinicoccaceae;g__Jeotgalicoccus;s__Jeotgalicoccus coquinae	Sichuan、Yunnan	0.0115889	0	0.349003	0	0.120299	0	0.146022	0	0	0.129201	0	0	1.58235	0.563858	1.41321	0.102606	0	6.93354	0	0.108021	4.04802	0	0.062631	3.18406	0.969049	0	0	0	0	0	0	0	0	0	0	0	0	0	0	0	0	0	0	0	0	0	0
MAG765	d__Bacteria;p__Actinomycetota;c__Actinomycetia;o__Mycobacteriales;f__Mycobacteriaceae;g__Corynebacterium;s__Corynebacterium gallinarum	Sichuan、Jiangsu	0.02629	0	0.067207	0	0	0	0	0.148917	0	0	0	0	0	0.0659876	0.046407	0	0	0.0149805	0	0	0.00798223	0	0.722824	0	0	0	0	0	0	0	0	0	0	0	0	0	0	0	0	0	0	0	0	0	0	0	0
MAG766	d__Bacteria;p__Acidobacteriota;c__Blastocatellia;o__Pyrinomonadales;f__Pyrinomonadaceae;g__OLB17;s__Unclassified	Sichuan	0	0.553687	0	0.0792517	0.627007	0.105895	0.899672	0	0.399721	1.44357	0	0.233101	0	0	0.0867355	0.88473	0.0503395	0	0	1.2848	0	0.254724	0	0	0.411754	0	0	0	0	0	0	0	0	0	0	0	0	0	0	0	0	0	0	0	0	0	0
MAG767	d__Bacteria;p__Pseudomonadota;c__Gammaproteobacteria;o__Burkholderiales;f__Burkholderiaceae_B;g__Ramlibacter;s__Unclassified	Yunnan	0	0	0	0	0	0	0	0	0	0	0	0	0	0	0	0	0	0	0	0	0	0	0	0	0	0	0	0	0	0	0	0	0	0	0	0	0	0	0	0	0	0	0	0	0	0	0
MAG768	d__Bacteria;p__Actinomycetota;c__Thermoleophilia;o__Gaiellales;f__Gaiellaceae;g__JACCRW01;s__Unclassified	Guizhou、Yunnan	0	0	0	0	0	0	0	0	0	0	0	0	0	0	0	0	0	0	0	0	0	0	0	0	0	0	0	0	0	0	0	0	0	0.226978	0	0	0	0	0	0	0	0	0	0	0	0	0
MAG769	d__Bacteria;p__Actinomycetota;c__Actinomycetia;o__Mycobacteriales;f__Mycobacteriaceae;g__Corynebacterium;s__Corynebacterium stationis	Sichuan、Yunnan、Jiangsu	0.0318756	0	0.959484	0	0	0	0	0	0	0	0	0	0.0313612	0.274211	0.106852	0	0	0.0893467	0	0	0.126776	0	0.164961	0.0458394	0	0	0	0	0	0	0	0	0	0	0	0	0	0	0	0	0	0	0	0	0	0	0
MAG77	d__Bacteria;p__Gemmatimonadota;c__Gemmatimonadetes;o__Gemmatimonadales;f__Gemmatimonadaceae;g__UBA4720;s__Unclassified	Sichuan	0	2.91849	0	0	0.32943	0	0.254336	0	0	0.295689	0	0	0	0	0.0602105	0.580929	0	0	0	0.316459	0	0	0	0	0	0	0	0	0	0	0	0	0	0	0	0	0	0	0	0	0	0	0	0	0	0	0
MAG770	d__Bacteria;p__Pseudomonadota;c__Alphaproteobacteria;o__Rhodobacterales;f__Rhodobacteraceae;g__Paracoccus;s__Unclassified	Sichuan、Guizhou、Jiangsu	0.654838	0.0842595	0	0.890942	0.193164	0.110904	0.392992	0.268762	0.252116	0.446938	0.548943	0	0	0	0.107339	0.18373	0.0539905	0	1.92777	0.31237	0	0.0716725	0.0404425	0	0.119421	0	0	0	0	0	0	0.16992	0	0	0	0	0	0	0	0	0	0.5412	0.152624	0	0	0	0
MAG771	d__Bacteria;p__Myxococcota;c__Myxococcia;o__Myxococcales;f__40CM-4-68-19;g__Unclassified;s__Unclassified	Yunnan	0	0	0	0	0	0	0	0	0	0	0	0	0	0	0	0	0	0	0	0	0	0	0	0	0	0	0	0	0	0	0	0	0	0	0	0	0	0	0	0	0	0	0	0	0	0	0
MAG772	d__Bacteria;p__Gemmatimonadota;c__Gemmatimonadetes;o__Gemmatimonadales;f__GWC2-71-9;g__Unclassified;s__Unclassified	Jiangsu	0	0	0	0	0	0	0	0	0	0	0	0	0	0	0	0	0	0	0	0	0	0	0	0	0	0	0	0	0	0	0	0	0	0	0	0	0	0	0	0	0	0	0	0	0	0	0
MAG773	d__Archaea;p__Thermoproteota;c__Nitrososphaeria;o__Nitrososphaerales;f__Nitrososphaeraceae;g__Nitrosocosmicus;s__Nitrosocosmicus oleophilus	Sichuan、Guizhou、Yunnan、Jiangsu	0	0	0	0	0.350471	0	0.160224	0	0.566981	0.414019	0	0.218148	0	0	0.0725104	0.476134	0	0	0	0.465007	0	0.233781	0	0	0.0831984	0.424925	0.193146	0.523577	0.90429	0.719682	0.72671	0.20397	0.271305	0.645958	1.10066	0.83927	0.463951	0.263865	0.915176	1.12113	0.805209	0.413855	0.266106	0.515745	0.636634	0.493773	0.197328
MAG774	d__Bacteria;p__Actinomycetota;c__Acidimicrobiia;o__Acidimicrobiales;f__JACDEA01;g__JACDEA01;s__Unclassified	Yunnan	0	0	0	0	0	0	0	0	0	0	0	0	0	0	0	0	0	0	0	0	0	0	0	0	0	0	0	0	0	0	0	0	0	0	0	0	0	0	0	0	0	0	0	0	0	0	0
MAG775	d__Bacteria;p__Pseudomonadota;c__Gammaproteobacteria;o__Xanthomonadales;f__Xanthomonadaceae;g__Pseudoxanthomonas;s__Unclassified	Jiangsu	0	0	0	0	0	0	0	0	0	0	0	0	0	0	0	0	0	0	0	0	0	0	0	0	0	0	0	0	0	0	0	0	0	0	0	0	0	0	0	0	0	0	0	0	0	0	0
MAG776	d__Bacteria;p__Fibrobacterota;c__Fibrobacteria;o__UBA11236;f__UBA11236;g__Chersky-265;s__Unclassified	Guizhou	0	0	0	0	0	0	0	0	0	0	0	0	0	0	0	0	0	0	0	0	0	0	0	0	0	0	0	0	0	0.139253	0	0	0	0	0	0	0	0	0	0	0	0	0	0	0	0	0
MAG777	d__Bacteria;p__Actinomycetota;c__Actinomycetia;o__Actinomycetales;f__Micrococcaceae;g__Arthrobacter;s__Unclassified	Yunnan	0	0	0	0	0	0	0	0	0	0	0	0	0	0	0	0	0	0	0	0	0	0	0	0	0	0	0	0	0	0	0	0	0	0	0	0	0	0	0	0	0	0	0	0	0	0	0
MAG778	d__Bacteria;p__Actinomycetota;c__Actinomycetia;o__Actinomycetales;f__Dermatophilaceae;g__Flexivirga;s__Unclassified	Sichuan、Jiangsu	0	0	0	0.0895172	0	0	0	0	0	0	0	0	0	0	0	0	0	0	0	0	0	0	0	0	0	0	0	0	0	0	0	0	0	0	0	0	0	0	0	0	0	0	0	0	0	0	0
MAG779	d__Bacteria;p__Actinomycetota;c__Thermoleophilia;o__Solirubrobacterales;f__70-9;g__Unclassified;s__Unclassified	Yunnan	0	0	0	0	0	0	0	0	0	0	0	0	0	0	0	0	0	0	0	0	0	0	0	0	0	0	0	0	0	0	0	0	0	0	0	0	0	0	0	0	0	0	0	0	0	0	0
MAG78	d__Bacteria;p__Actinomycetota;c__Actinomycetia;o__Propionibacteriales;f__Propionibacteriaceae;g__Unclassified;s__Unclassified	Sichuan	0	0	1.10172	0	0	0	0	0	0	0	0	0	0	0	0	0	0	0	0	0	0.00632189	0	0	0	0	0	0	0	0	0	0	0	0	0	0	0	0	0	0	0	0	0	0	0	0	0	0
MAG780	d__Bacteria;p__Acidobacteriota;c__Blastocatellia;o__Pyrinomonadales;f__Pyrinomonadaceae;g__UBA11740;s__Unclassified	Jiangsu	0	0	0	0	0	0	0	0	0	0	0	0	0	0	0	0	0	0	0	0	0	0	0	0	0	0	0	0	0	0	0	0	0	0	0	0	0	0	0	0	0	0	0	0	0	0	0
MAG781	d__Bacteria;p__Pseudomonadota;c__Gammaproteobacteria;o__Pseudomonadales;f__Moraxellaceae;g__Acinetobacter;s__Acinetobacter harbinensis	Sichuan、Guizhou	1.23952	0	0	0	0	0	0	0	0	0	0	0	0	0	0	0	0	0	0.166498	0	0	0	0	0	0	0	0	0	0	0	0	0	0	0	0	0	0	0	0	0	0	0	0	0	0	0	0.151266
MAG782	d__Bacteria;p__Chloroflexota;c__Limnocylindria;o__QHBO01;f__QHBO01;g__JACDBZ01;s__Unclassified	Sichuan、Guizhou、Yunnan、Jiangsu	0	0	0	0	0	0	0	0	0	0	0	0.0612715	0	0	0	0	0	0	0	0	0	0	0	0	0	0.237709	0.133359	0.340657	0	0	0.195668	0.084156	0	0	0	0.233575	0	1.39676	0	0	0.2362	0	0.102662	0	0	0	0.0644144
MAG783	d__Bacteria;p__Bacillota;c__Bacilli;o__Lactobacillales;f__Lactobacillaceae;g__Limosilactobacillus;s__Limosilactobacillus reuteri	Sichuan、Yunnan、Jiangsu	0.0875997	0	0.0217489	0	0	0	0	0	0	0	0	0	0.066183	0.0140199	0.155844	0	0	0.289724	0.0505087	0	0.869983	0	0.0303415	0.26053	0	0	0	0	0	0	0	0	0	0	0	0	0	0	0	0	0	0	0	0	0	0	0
MAG784	d__Bacteria;p__Acidobacteriota;c__Vicinamibacteria;o__Vicinamibacterales;f__2-12-FULL-66-21;g__JACDCA01;s__Unclassified	Jiangsu	0	0	0	0	0	0	0	0	0	0	0	0	0	0	0	0	0	0	0	0	0	0	0	0	0	0	0	0	0	0	0	0	0	0	0	0	0	0	0	0	0	0	0	0	0	0	0
MAG785	d__Bacteria;p__Actinomycetota;c__Actinomycetia;o__Propionibacteriales;f__Propionibacteriaceae;g__Arachnia;s__Unclassified	Sichuan、Guizhou	0.443626	0	0	0.303269	0	0.0465528	0	0.173917	0.144201	0	0	0	0	0	0	0	0	0	1.96611	0	0	0	0.128936	0	0	0	0.105625	0	0	0	0	0.0564894	0	0	0	0	0	0	0	0	0	0	0	0	0	0	0
MAG786	d__Bacteria;p__Bacteroidota;c__Bacteroidia;o__Flavobacteriales;f__Flavobacteriaceae;g__JAJYTI01;s__Unclassified	Sichuan、Yunnan	0	0	0	0	0	0	0	0	0	0	0	0	1.13504	0	0	0	0	0.0275212	0	0	0.0456931	0	0	0.00797182	0	0	0	0	0	0	0	0	0	0	0	0	0	0	0	0	0	0	0	0	0	0	0
MAG787	d__Bacteria;p__Bacillota_A;c__Clostridia;o__Tissierellales;f__Gottschalkiaceae;g__Andreesenia;s__Unclassified	Sichuan	0.273345	0	0	0.550126	0	0.0478004	0	0	0	0	0	0	0	0	0	0	0	0	1.56785	0	0	0	0	0	0	0	0	0	0	0	0	0	0	0	0	0	0	0	0	0	0	0	0	0	0	0	0
MAG788	d__Bacteria;p__Pseudomonadota;c__Gammaproteobacteria;o__Burkholderiales;f__Burkholderiaceae_B;g__Rubrivivax_A;s__Unclassified	Guizhou、Jiangsu	0	0	0	0	0	0	0	0	0	0	0	0	0	0	0	0	0	0	0	0	0	0	0	0	0	0.30102	0.150146	2.83264	0	2.0611	0.399959	0.190929	0.912191	0	0.204171	0.312505	0.442937	0	0.309909	0.0995706	0.20798	0.309605	0.122096	0.876129	1.12912	0.12967	0.581138
MAG789	d__Bacteria;p__Chloroflexota;c__Ktedonobacteria;o__Ktedonobacterales;f__JADMIN01;g__JAKAIY01;s__Unclassified	Jiangsu	0	0	0	0	0	0	0	0	0	0	0	0	0	0	0	0	0	0	0	0	0	0	0	0	0	0	0	0	0	0	0	0	0	0	0	0	0	0	0	0	0	0	0	0	0	0	0
MAG79	d__Bacteria;p__Actinomycetota;c__Actinomycetia;o__Actinomycetales;f__Micrococcaceae;g__Glutamicibacter;s__Glutamicibacter arilaitensis	Sichuan、Jiangsu	4.01437	0	0.0850795	1.32618	0.175039	0.300948	0.315869	0	0.0993043	0.109612	0	0	0	0	0.121502	0	0	0.0822243	1.19724	0	0.0105456	0	0.157169	0.331766	0.186072	0	0	0	0	0	0	0	0	0	0	0	0	0	0	0	0	0	0	0	0	0	0
MAG790	d__Bacteria;p__Deinococcota;c__Deinococci;o__Deinococcales;f__Deinococcaceae;g__Deinococcus;s__Unclassified	Sichuan、Jiangsu	0	1.21618	0	0	0	0	0	0.471969	0	0.326605	0.392356	0	0	0	3.66148	0	1.02791	0	0	0.508407	0	1.09378	0	0	0	0	0	0	0	0	0	0	0	0	0	0	0	0	0	0	0	0	0	0	0	0	0
MAG791	d__Bacteria;p__Pseudomonadota;c__Alphaproteobacteria;o__Sphingomonadales;f__Sphingomonadaceae;g__Allosphingosinicella;s__Unclassified	Yunnan	0	0	0	0	0	0	0	0	0	0	0	0	0	0	0	0	0	0	0	0	0	0	0	0	0	0	0	0	0	0	0	0	0	0	0	0	0	0	0	0	0	0	0	0	0	0	0
MAG792	d__Bacteria;p__Patescibacteria;c__Microgenomatia;o__Levybacterales;f__GWA1-39-11;g__JAGORM01;s__Unclassified	Yunnan	0	0	0	0	0	0	0	0	0	0	0	0	0	0	0	0	0	0	0	0	0	0	0	0	0	0	0	0	0	0	0	0	0	0	0	0	0	0	0	0	0	0	0	0	0	0	0
MAG793	d__Archaea;p__Thermoproteota;c__Nitrososphaeria;o__Nitrososphaerales;f__Nitrososphaeraceae;g__Nitrosocosmicus;s__Nitrosocosmicus oleophilus	Sichuan、Guizhou、Yunnan、Jiangsu	0	0.0671642	0	0.0665378	0.481326	0.0390399	0.214767	0	0.792072	0.608824	0	0.317295	0	0	0.103317	0.645331	0	0	0	0.626356	0	0.332621	0	0	0.112411	0.379053	0.214547	0.503799	0.840122	0.70265	0.861109	0.208247	0.163035	0.532998	0.774091	0.723093	0.436568	0.26767	0.825494	1.32794	0.919827	0.516283	0.314468	0.481056	0.577777	0.523857	0.161708
MAG794	d__Bacteria;p__Pseudomonadota;c__Gammaproteobacteria;o__Pseudomonadales;f__Pseudomonadaceae;g__Thiopseudomonas;s__Unclassified	Sichuan	0	0	0	0	0	0	0	0	0	0	0	0	0.707491	0	0	0	0	0.0624593	0	0	0.0731199	0	0	0	0	0	0	0	0	0	0	0	0	0	0	0	0	0	0	0	0	0	0	0	0	0	0
MAG795	d__Bacteria;p__Acidobacteriota;c__Blastocatellia;o__Pyrinomonadales;f__Pyrinomonadaceae;g__UBA11740;s__Unclassified	Yunnan	0	0	0	0	0	0	0	0	0	0	0	0	0	0	0	0	0	0	0	0	0	0	0	0	0	0	0	0	0	0	0	0	0	0	0	0	0	0	0	0	0	0	0	0	0	0	0
MAG796	d__Bacteria;p__Bacteroidota;c__Bacteroidia;o__Flavobacteriales;f__Flavobacteriaceae;g__JAAYLC01;s__Unclassified	Sichuan、Yunnan	0	0	0.0267905	0	0	0	0	0	0	0	0	0	1.64834	0.142115	2.62446	0	0	0.0635913	0	0	0.252416	0	0.0509259	0.0434544	0.520214	0	0	0	0	0	0	0	0	0	0	0	0	0	0	0	0	0	0	0	0	0	0
MAG797	d__Bacteria;p__Bacillota;c__Bacilli;o__Lactobacillales;f__Lactobacillaceae;g__Ligilactobacillus;s__Ligilactobacillus salivarius	Sichuan、Jiangsu	0.332226	0	0.105904	0	0	0.178495	0.129376	0	0	0	0	0	0.246873	0.0407073	0.261637	0	0	0.334812	0.0274414	0	1.87425	0	0.0516952	0.185373	0	0	0	0	0	0	0	0	0	0	0	0	0	0	0	0	0	0	0	0	0	0	0
MAG798	d__Bacteria;p__Nitrospirota;c__Nitrospiria;o__Nitrospirales;f__Nitrospiraceae;g__Unclassified;s__Unclassified	Sichuan、Guizhou、Jiangsu	0	0.20287	0	0	0	0	0	0	0	0.134886	0	0	0	0	0	0	0	0	0	0	0	0	0	0	0	0.168422	0	0	0	0.153189	0.262283	0	0.200342	0	0.205225	0	0.196596	0	0	0.150065	0.253434	0	0	0.223892	0.211742	0	0.112808
MAG799	d__Bacteria;p__Pseudomonadota;c__Alphaproteobacteria;o__Rhizobiales;f__Xanthobacteraceae;g__PALSA-894;s__Unclassified	Guizhou、Jiangsu	0	0	0	0	0	0	0	0	0	0	0	0	0	0	0	0	0	0	0	0	0	0	0	0	0	0	0	0	0	0.256607	0	0	0.228435	0	0	0	0.0895429	0	0	0	0	0	0	0.190563	0.282476	0	1.99267
MAG8	d__Bacteria;p__Cyanobacteriota;c__Cyanobacteriia;o__Cyanobacteriales;f__Microcoleaceae;g__Microcoleus;s__Unclassified	Sichuan、Guizhou、Yunnan、Jiangsu	0	0	0	0	0	0	0	0.0938107	0	0	0	0	0	0	0	0	0	0	0.0213257	0	0	0	0	0	0	0	0	0.892003	0	0.100874	0.461286	0.268911	0.242083	0	0	0.274413	0.127259	5.27056	0.362788	0.133877	0	0.312671	0.287271	0.10545	0	1.63247	1.48467
MAG80	d__Bacteria;p__Actinomycetota;c__Thermoleophilia;o__Solirubrobacterales;f__70-9;g__JAJKHV01;s__Unclassified	Sichuan、Yunnan	0	0	0	0	0	0.0693198	0	0	0.213597	0	0	0	0	0	0	0	0	0	0	0	0	6.19041	0	0	0	0	0	0	0	0	0	0	0	0	0	0	0	0	0	0	0	0	0	0	0	0	0
MAG800	d__Bacteria;p__Bacteroidota;c__Bacteroidia;o__Flavobacteriales;f__Flavobacteriaceae;g__Flavobacterium;s__Unclassified	Sichuan、Yunnan	0	0	0	0	0	0	0	0	0	0	0	0	2.30601	0	0	0	0	0.133361	0	0	0.050459	0	0	0	0	0	0	0	0	0	0	0	0	0	0	0	0	0	0	0	0	0	0	0	0	0	0
MAG801	d__Bacteria;p__Actinomycetota;c__Actinomycetia;o__Mycobacteriales;f__Mycobacteriaceae;g__Gordonia;s__Unclassified	Sichuan	0	0	0.600152	0	0	0	0	0	0	0	0	0	0	0.0259499	0	0	0	0	0	0	0	0	0	0	0	0	0	0	0	0	0	0	0	0	0	0	0	0	0	0	0	0	0	0	0	0	0
MAG802	d__Bacteria;p__Actinomycetota;c__Actinomycetia;o__Actinomycetales;f__Micrococcaceae;g__Arthrobacter;s__Arthrobacter equi	Sichuan、Guizhou、Yunnan、Jiangsu	0.0512177	0.345417	0	0.557419	0.998291	0.25638	2.84331	0	0.325026	0.660085	0.917687	0.33006	0	0	0.389444	0.460082	0.105364	0	0.260228	0.260721	0	0	0	0	3.25806	0.539662	0.3881	0	0	0	0	0.241011	0	0	0	0.513914	0	0	0.564405	0.159455	0.122608	0.242185	0.142536	0	0	0	0
MAG803	d__Bacteria;p__Nitrospirota;c__Nitrospiria;o__Nitrospirales;f__Nitrospiraceae;g__Nitrospira_F;s__Unclassified	Sichuan、Guizhou、Jiangsu	0	1.48181	0	0.256278	1.13966	0	0.546087	0	0.44507	0.959893	0.172455	0	0	0	0.186115	1.89726	0	0	0	0.948759	0	0.144067	0	0	0.614178	0.234576	0.214212	0	0	0	0.380965	0	0	0	0.162626	0	0.126739	0	0	0	0.417236	0	0	0	0	0	0
MAG804	d__Bacteria;p__Actinomycetota;c__Actinomycetia;o__Propionibacteriales;f__Propionibacteriaceae;g__Arachnia;s__Unclassified	Sichuan	0	0	6.51905	0	0.164692	0	0	0	0	0	0	0	0	0	0	0	0	0	0	0	0	0	0.0695932	0	0	0	0	0	0	0	0	0	0	0	0	0	0	0	0	0	0	0	0	0	0	0	0
MAG805	d__Bacteria;p__Actinomycetota;c__Actinomycetia;o__Actinomycetales;f__Microbacteriaceae;g__Agromyces;s__Unclassified	Guizhou、Jiangsu	0	0	0	0	0	0	0	0	0	0	0	0	0	0	0	0	0	0	0	0	0	0	0	0	0	0	0	0	0	0	0	0.164766	0	0	0	0	0	0	0	0	0	0.863508	0.361964	0	0	0.226437	0
MAG806	d__Bacteria;p__Actinomycetota;c__Actinomycetia;o__Actinomycetales;f__Micrococcaceae;g__Kocuria;s__Unclassified	Jiangsu	0	0	0	0	0	0	0	0	0	0	0	0	0	0	0	0	0	0	0	0	0	0	0	0	0	0	0	0	0	0	0	0	0	0	0	0	0	0	0	0	0	0	0	0	0	0	0
MAG807	d__Bacteria;p__Pseudomonadota;c__Gammaproteobacteria;o__Burkholderiales;f__Casimicrobiaceae;g__VBCG01;s__Unclassified	Sichuan、Jiangsu	0.00909488	0	0	3.1356	0	0.492267	1.80565	0	0	0.235442	0	0	0	0	0	0	0	0	0.0622925	0.101169	0	0.0420063	0	0	1.10758	0	0	0	0	0	0	0	0	0	0	0	0	0	0	0	0	0	0	0	0	0	0
MAG808	d__Bacteria;p__Pseudomonadota;c__Gammaproteobacteria;o__Xanthomonadales;f__Rhodanobacteraceae;g__Unclassified;s__Unclassified	Sichuan	0	0	0	0	0	0	0	0	0	0	0	0	0.122744	0	2.05935	0.0734403	0	0	0	0	0.0312615	0	0	0	0	0	0	0	0	0	0	0	0	0	0	0	0	0	0	0	0	0	0	0	0	0	0
MAG809	d__Bacteria;p__Actinomycetota;c__Actinomycetia;o__Mycobacteriales;f__Mycobacteriaceae;g__Corynebacterium;s__Unclassified	Sichuan	0	0	0.514489	0	0	0	0	0	0	0	0	0	0	0	0	0	0	0	0	0	0	0	0.0529842	0	0	0	0	0	0	0	0	0	0	0	0	0	0	0	0	0	0	0	0	0	0	0	0
MAG81	d__Bacteria;p__Actinomycetota;c__Actinomycetia;o__Actinomycetales;f__JAHECE01;g__JAHECE01;s__Unclassified	Jiangsu	0	0	0	0	0	0	0	0	0	0	0	0	0	0	0	0	0	0	0	0	0	0	0	0	0	0	0	0	0	0	0	0	0	0	0	0	0	0	0	0	0	0	0	0	0	0	0
MAG810	d__Bacteria;p__Patescibacteria;c__Saccharimonadia;o__Saccharimonadales;f__UBA10212;g__JACDFN01;s__Unclassified	Jiangsu	0	0	0	0	0	0	0	0	0	0	0	0	0	0	0	0	0	0	0	0	0	0	0	0	0	0	0	0	0	0	0	0	0	0	0	0	0	0	0	0	0	0	0	0	0	0	0
MAG811	d__Bacteria;p__Actinomycetota;c__Actinomycetia;o__Propionibacteriales;f__Propionibacteriaceae;g__Raineyella;s__Unclassified	Sichuan、Jiangsu	1.05515	0	0.18185	1.15023	0	0.0871426	0	0.243459	0.202832	0	0	0	0	0	0	0	0	0	4.11925	0	0	0	0.140301	0	0	0	0	0	0	0	0	0	0	0	0	0	0	0	0	0	0	0	0	0	0	0	0
MAG812	d__Bacteria;p__Pseudomonadota;c__Gammaproteobacteria;o__Burkholderiales;f__Nitrosomonadaceae;g__Nitrosospira;s__Nitrosospira multiformis_D	Sichuan、Guizhou、Yunnan、Jiangsu	0	0	0	0.198914	0	0	0	0	0.309855	0.152969	0	0	0	0	0	0	0	0	0.0253597	0	0	0	0	0	0	1.10277	0.485863	0	0.769921	0.0810389	0.227862	2.1971	0	0	1.31421	0.708207	0.405883	0	0.783362	0.0911321	0	1.18411	0.47195	0	0.193032	2.74692	0
MAG813	d__Bacteria;p__Pseudomonadota;c__Alphaproteobacteria;o__Sphingomonadales;f__Sphingomonadaceae;g__Sphingomicrobium;s__Unclassified	Jiangsu	0	0	0	0	0	0	0	0	0	0	0	0	0	0	0	0	0	0	0	0	0	0	0	0	0	0	0	0	0	0	0	0	0	0	0	0	0	0	0	0	0	0	0	0	0	0	0
MAG814	d__Bacteria;p__Verrucomicrobiota;c__Verrucomicrobiae;o__Chthoniobacterales;f__UBA10450;g__CADDYX01;s__Unclassified	Yunnan	0	0	0	0	0	0	0	0	0	0	0	0	0	0	0	0	0	0	0	0	0	0	0	0	0	0	0	0	0	0	0	0	0	0	0	0	0	0	0	0	0	0	0	0	0	0	0
MAG815	d__Bacteria;p__Bacteroidota;c__Bacteroidia;o__Chitinophagales;f__Chitinophagaceae;g__JAFAGI01;s__JAFAGI01 sp023386235	Sichuan、Yunnan	0	0	0.00851368	0	0	0	0	0	0	0	0	0	0	0	0	0	0	0	0	0	0	0	1.99278	0	0	0	0	0	0	0	0	0	0	0	0	0	0	0	0	0	0	0	0	0	0	0	0
MAG816	d__Bacteria;p__Bacteroidota;c__Bacteroidia;o__Chitinophagales;f__Chitinophagaceae;g__Ferruginibacter;s__Unclassified	Sichuan、Guizhou	0	0	0	0	0.0840401	0.0367427	0	0.175099	0.615744	0.157346	0	0	0	0	0	0	0	0	0.979394	0	0	0	0	0	0	0	0	0	0	0	0	0	0	0	0	0	0	0	0	0	0	0.0848681	0	0	0	0	0
MAG817	d__Bacteria;p__Pseudomonadota;c__Gammaproteobacteria;o__Enterobacterales;f__Enterobacteriaceae;g__Escherichia;s__Escherichia coli	Sichuan、Yunnan、Jiangsu	0.0339874	0	0	0	0	0	0	0	0	0	0	0	0	0	0	0	0	0.0466285	0	0	0	0	0	0	0	0	0	0	0	0	0	0	0	0	0	0	0	0	0	0	0	0	0	0	0	0	0
MAG818	d__Bacteria;p__Chloroflexota;c__UBA5177;o__Unclassified;f__Unclassified;g__Unclassified;s__Unclassified	Yunnan	0	0	0	0	0	0	0	0	0	0	0	0	0	0	0	0	0	0	0	0	0	0	0	0	0	0	0	0	0	0	0	0	0	0	0	0	0	0	0	0	0	0	0	0	0	0	0
MAG819	d__Bacteria;p__Actinomycetota;c__Actinomycetia;o__Actinomycetales;f__Microbacteriaceae;g__Agrococcus;s__Unclassified	Sichuan	0	0	0.085594	0	0	0	0	0.161818	0	0	0	0	0.0567225	0.859631	0.235655	0	0	0.0595952	0	0	0.194104	0	0.00891045	0.0140598	1.09364	0	0	0	0	0	0	0	0	0	0	0	0	0	0	0	0	0	0	0	0	0	0
MAG82	d__Bacteria;p__Actinomycetota;c__Actinomycetia;o__Actinomycetales;f__Micrococcaceae;g__Arthrobacter;s__Arthrobacter oxydans	Guizhou、Yunnan、Jiangsu	0	0	0	0	0	0	0	0	0	0	0	0	0	0	0	0	0	0	0	0	0	0	0	0	0	0.990718	1.37677	0.239586	0	0.104107	0.19362	0.442292	0	0	0.454397	0	0	0.391644	0	0.338045	0.481273	0	0.217339	0	0	0	0.125476
MAG820	d__Bacteria;p__Pseudomonadota;c__Gammaproteobacteria;o__Burkholderiales;f__Burkholderiaceae_C;g__JAJYRX01;s__Unclassified	Sichuan	0	0	0.0127805	0	0	0	0	0	0	0	0	0	0.801615	0.0318906	0.183515	0	0	0.0206907	0	0	0.142636	0	0	0.191424	0.249389	0	0	0	0	0	0	0	0	0	0	0	0	0	0	0	0	0	0	0	0	0	0
MAG821	d__Bacteria;p__Acidobacteriota;c__Blastocatellia;o__Pyrinomonadales;f__Pyrinomonadaceae;g__QHXN01;s__Unclassified	Yunnan	0	0	0	0	0	0	0	0	0	0	0	0	0	0	0	0	0	0	0	0	0	0	0	0	0	0	0	0	0	0	0	0	0	0	0	0	0	0	0	0	0	0	0	0	0	0	0
MAG822	d__Bacteria;p__Actinomycetota;c__Actinomycetia;o__Actinomycetales;f__Micrococcaceae;g__Kocuria;s__Unclassified	Jiangsu	0	0	0	0	0	0	0	0	0	0	0	0	0	0	0	0	0	0	0	0	0	0	0	0	0	0	0	0	0	0	0	0	0	0	0	0	0	0	0	0	0	0	0	0	0	0	0
MAG823	d__Bacteria;p__Acidobacteriota;c__Blastocatellia;o__Pyrinomonadales;f__Pyrinomonadaceae;g__OLB17;s__Unclassified	Sichuan	0	0.569616	0	0.073956	0.696929	0.112242	0.902433	0	0.400348	0.866293	0	0.242584	0	0	0.0883491	1.43748	0	0	0	1.25883	0	0.255147	0	0	0.412341	0	0	0	0	0	0	0	0	0	0	0	0	0	0	0	0	0	0	0	0	0	0
MAG824	d__Bacteria;p__Actinomycetota;c__Actinomycetia;o__Mycobacteriales;f__Mycobacteriaceae;g__Corynebacterium;s__Unclassified	Sichuan	0	0	0.0190589	0	0	0	0	0	0	0	0	0	0.231775	0	0.159942	0	0	0.226824	0	0	0.250666	0	0.0202237	0.400562	0.0850277	0	0	0	0	0	0	0	0	0	0	0	0	0	0	0	0	0	0	0	0	0	0
MAG825	d__Bacteria;p__Actinomycetota;c__Actinomycetia;o__Actinomycetales;f__Micrococcaceae;g__Glutamicibacter;s__Glutamicibacter arilaitensis	Sichuan	3.48686	0	0.0609782	1.53414	0.142097	0.262051	0.274931	0	0	0.0868289	0	0	0	0	0.0800822	0	0	0.0654718	0.938963	0	0.00588034	0	0.105521	0.271555	0.149785	0	0	0	0	0	0	0	0	0	0	0	0	0	0	0	0	0	0	0	0	0	0
MAG826	d__Bacteria;p__Dormibacterota;c__Dormibacteria;o__Dormibacterales;f__Dormibacteraceae;g__CF-28;s__Unclassified	Yunnan	0	0	0	0	0	0	0	0	0	0	0	0	0	0	0	0	0	0	0	0	0	0	0	0	0	0	0	0	0	0	0	0	0	0	0	0	0	0	0	0	0	0	0	0	0	0	0
MAG827	d__Bacteria;p__Armatimonadota;c__DTGP01;o__Unclassified;f__Unclassified;g__Unclassified;s__Unclassified	Sichuan	0	0	0	0	0	0	0	0	0	0	0	0	0	0	0.0608135	0	2.89908	0	0	0	0	0	0	0	0	0	0	0	0	0	0	0	0	0	0	0	0	0	0	0	0	0	0	0	0	0	0
MAG828	d__Bacteria;p__Pseudomonadota;c__Alphaproteobacteria;o__Sphingomonadales;f__Sphingomonadaceae;g__Sphingomicrobium;s__Unclassified	Sichuan、Yunnan	0	0.178366	0	0.113516	0.152252	0.102743	0.9195	0	1.07968	0.549578	0.212025	0	0	0	0	0.281569	0	0	0.0594247	0.33011	0	5.69256	0	0	0.522028	0	0	0	0	0	0	0	0	0	0	0	0	0	0	0	0	0	0	0	0	0	0
MAG829	d__Bacteria;p__Gemmatimonadota;c__Gemmatimonadetes;o__Gemmatimonadales;f__Gemmatimonadaceae;g__JADGGM01;s__Unclassified	Jiangsu	0	0	0	0	0	0	0	0	0	0	0	0	0	0	0	0	0	0	0	0	0	0	0	0	0	0	0	0	0	0	0	0	0	0	0	0	0	0	0	0	0	0	0	0	0	0	0
MAG83	d__Bacteria;p__Actinomycetota;c__Actinomycetia;o__Actinomycetales;f__Micrococcaceae;g__Arthrobacter;s__Unclassified	Yunnan	0	0	0	0	0	0	0	0	0	0	0	0	0	0	0	0	0	0	0	0	0	0	0	0	0	0	0	0	0	0	0	0	0	0	0	0	0	0	0	0	0	0	0	0	0	0	0
MAG830	d__Bacteria;p__Acidobacteriota;c__Thermoanaerobaculia;o__Gp7-AA8;f__Gp7-AA8;g__QHVT01;s__Unclassified	Guizhou、Yunnan	0	0	0	0	0	0	0	0	0	0	0	0	0	0	0	0	0	0	0	0	0	0	0	0	0	0	0	0	0	0	0	0	0	0	0	0	0	0	0	0	0	0	0	0	0	0	0
MAG831	d__Bacteria;p__Bacteroidota;c__Bacteroidia;o__Chitinophagales;f__Chitinophagaceae;g__VBAS01;s__Unclassified	Guizhou、Yunnan、Jiangsu	0	0	0	0	0	0	0	0	0	0	0	0	0	0	0	0	0	0	0	0	0	0	0	0	0	0	0	0	15.8185	0	0	0	0	0.973713	0.182637	4.37998	0	0	6.04537	0	0	0.194645	0	0	0.117021	0.267245	0
MAG832	d__Bacteria;p__Bacteroidota;c__Bacteroidia;o__Chitinophagales;f__Chitinophagaceae;g__Segetibacter;s__Unclassified	Sichuan	0	0	0	0	0	0	0	0	0	0	0	0	0	0	0.223234	0	11.4353	0	0	0	0	0	0	0	0	0	0	0	0	0	0	0	0	0	0	0	0	0	0	0	0	0	0	0	0	0	0
MAG833	d__Bacteria;p__Gemmatimonadota;c__Gemmatimonadetes;o__Gemmatimonadales;f__Gemmatimonadaceae;g__JADGGM01;s__Unclassified	Jiangsu	0	0	0	0	0	0	0	0	0	0	0	0	0	0	0	0	0	0	0	0	0	0	0	0	0	0	0	0	0	0	0	0	0	0	0	0	0	0	0	0	0	0	0	0	0	0	0
MAG834	d__Bacteria;p__Chloroflexota;c__Anaerolineae;o__Anaerolineales;f__EnvOPS12;g__UBA12294;s__Unclassified	Sichuan、Jiangsu	0	0	0	0	1.92453	0	0	0	0	0.111698	0.360733	0	0	0	0.174666	3.32037	0	0	0	0.107233	0	0	0	0	0	0	0	0	0	0	0	0	0	0	0	0	0	0	0	0	0	0	0	0	0	0	0
MAG835	d__Bacteria;p__Actinomycetota;c__Actinomycetia;o__Actinomycetales;f__Brevibacteriaceae;g__Brevibacterium;s__Brevibacterium yomogidense_A	Sichuan	0	0	0.240061	0	0	0	0	0.200188	0	0	0	0	0.0138732	0.114287	0.108458	0	0	0.0467163	0	0	0.272354	0	0.0400495	0.421043	0.154477	0	0	0	0	0	0	0	0	0	0	0	0	0	0	0	0	0	0	0	0	0	0
MAG836	d__Bacteria;p__Actinomycetota;c__Actinomycetia;o__Actinomycetales;f__Microbacteriaceae;g__Microbacterium;s__Microbacterium pullistercoris	Sichuan	0	0	0.0392672	0	0	0	0	0	0	0	0	0	0.107188	0.227874	0.140347	0	0	0.0726642	0	0	0.317539	0	0	0.0259961	1.16995	0	0	0	0	0	0	0	0	0	0	0	0	0	0	0	0	0	0	0	0	0	0
MAG837	d__Bacteria;p__Bacteroidota;c__Bacteroidia;o__Chitinophagales;f__Chitinophagaceae;g__Flavitalea;s__Flavitalea sp023437225	Sichuan、Jiangsu	0	0	0	0	0	0	0	0.0553993	0	0	0.152316	0	0	0	0.669521	0	4.32278	0	0	0	0	0	0	0	0	0	0	0	0	0	0	0	0	0	0	0	0	0	0	0	0	0	0	0	0	0	0
MAG838	d__Bacteria;p__Patescibacteria;c__Saccharimonadia;o__Saccharimonadales;f__UBA10212;g__JAIFWC01;s__Unclassified	Yunnan	0	0	0	0	0	0	0	0	0	0	0	0	0	0	0	0	0	0	0	0	0	0	0	0	0	0	0	0	0	0	0	0	0	0	0	0	0	0	0	0	0	0	0	0	0	0	0
MAG839	d__Bacteria;p__Bacteroidota;c__Bacteroidia;o__Flavobacteriales;f__Weeksellaceae;g__Kaistella;s__Kaistella beijingensis	Sichuan	0	0	0	0	0	0	0	0	0	0	0	0	0	0	0	0	0	0	0	0	0	0	0.431079	0	0	0	0	0	0	0	0	0	0	0	0	0	0	0	0	0	0	0	0	0	0	0	0
MAG84	d__Archaea;p__Thermoproteota;c__Nitrososphaeria;o__Nitrososphaerales;f__Nitrososphaeraceae;g__Nitrosocosmicus;s__Nitrosocosmicus oleophilus	Sichuan、Guizhou、Yunnan、Jiangsu	0	0.071791	0	0.0778713	0.505361	0.0460545	0.227419	0	0.912788	0.611537	0	0.325074	0	0	0.113431	0.672032	0	0	0	0.627661	0	0.586855	0	0	0.120305	0.301601	0.160724	0.366946	0.694538	0.443086	0.712267	0.166881	0.114131	0.431255	0.622187	0.570141	0.315707	0.197565	0.625502	0.941975	0.779294	0.433232	0.243295	0.333055	0.383914	0.430202	0.111909
MAG840	d__Bacteria;p__Dormibacterota;c__Dormibacteria;o__Dormibacterales;f__Dormibacteraceae;g__CF-161;s__Unclassified	Guizhou、Yunnan	0	0	0	0	0	0	0	0	0	0	0	0	0	0	0	0	0	0	0	0	0	0	0	0	0	0	0	0	0	0	0	0	0	0	0	0	0	0	0	0	0	0	0	0	0	0	0
MAG841	d__Bacteria;p__Bacillota;c__Bacilli;o__Lactobacillales;f__Lactobacillaceae;g__Limosilactobacillus;s__Limosilactobacillus vaginalis	Sichuan、Jiangsu	0.0865033	0	0.0192689	0	0	0	0	0	0	0	0	0	0.0737221	0.0253796	0.228125	0	0	0.790378	0.044067	0	1.50164	0	0.0320693	0.424265	0	0	0	0	0	0	0	0	0	0	0	0	0	0	0	0	0	0	0	0	0	0	0
MAG842	d__Bacteria;p__Actinomycetota;c__Actinomycetia;o__Mycobacteriales;f__Mycobacteriaceae;g__Corynebacterium;s__Corynebacterium glutamicum	Sichuan、Yunnan、Jiangsu	0.0380985	0	1.81634	0	0	0	0	0	0	0	0	0	0.01275	0.0485879	0.0591617	0	0	0.108473	0	0	0.0735572	0	0.458074	0.0905937	0	0	0	0	0	0	0	0	0	0	0	0	0	0	0	0	0	0	0	0	0	0	0
MAG843	d__Bacteria;p__Pseudomonadota;c__Alphaproteobacteria;o__Acetobacterales;f__Acetobacteraceae;g__Unclassified;s__Unclassified	Jiangsu	0	0	0	0	0	0	0	0	0	0	0	0	0	0	0	0	0	0	0	0	0	0	0	0	0	0	0	0	0	0	0	0	0	0	0	0	0	0	0	0	0	0	0	0	0	0	0
MAG844	d__Bacteria;p__Bacteroidota;c__Bacteroidia;o__Chitinophagales;f__Chitinophagaceae;g__Hanamia;s__Unclassified	Jiangsu	0	0	0	0	0	0	0	0	0	0	0	0	0	0	0	0	0	0	0	0	0	0	0	0	0	0	0	0	0	0	0	0	0	0	0	0	0	0	0	0	0	0	0	0	0	0	0
MAG845	d__Bacteria;p__Actinomycetota;c__Actinomycetia;o__Actinomycetales;f__Micrococcaceae;g__Arthrobacter;s__Arthrobacter oxydans	Sichuan、Guizhou、Yunnan、Jiangsu	0	0	0	0	0.0869981	0	0	0	0	0	0	0	0	0	0	0	0	0	0	0	0	0	0	0	0	1.22547	1.70361	0.285931	0	0.117342	0.244873	0.559367	0	0	0.565109	0	0	0.464616	0	0.414635	0.587168	0	0.266353	0	0	0	0.153231
MAG846	d__Bacteria;p__Bacillota;c__Bacilli;o__Lactobacillales;f__Lactobacillaceae;g__Lactobacillus;s__Lactobacillus gallinarum	Sichuan、Jiangsu	1.14959	0	0.00491283	0.103264	0	0.0758102	0	0	0	0	0	0	0.0924057	0	0.318417	0	0	3.05632	0.0998439	0.0906651	2.03092	0	0.0188016	0.397448	0.147042	0	0	0	0	0	0	0	0	0	0	0	0	0	0	0	0	0	0	0	0	0	0
MAG847	d__Bacteria;p__Gemmatimonadota;c__Gemmatimonadetes;o__Longimicrobiales;f__Longimicrobiaceae;g__Longimicrobium;s__Unclassified	Guizhou、Yunnan	0	0	0	0	0	0	0	0	0	0	0	0	0	0	0	0	0	0	0	0	0	0	0	0	0	0	0	0	0	0	0	0	0	0	0	0	0	0	0	0	0	0	0	0	0	0	0
MAG848	d__Bacteria;p__Pseudomonadota;c__Gammaproteobacteria;o__Xanthomonadales;f__Rhodanobacteraceae;g__66-474;s__Unclassified	Sichuan	0	0	0	0.0730863	0	5.08247	0	0	0	0	0	0	0	0	0	0	0	0	0	0	0	0	0	0	0	0	0	0	0	0	0	0	0	0	0	0	0	0	0	0	0	0	0	0	0	0	0
MAG849	d__Bacteria;p__Chloroflexota;c__Anaerolineae;o__Anaerolineales;f__EnvOPS12;g__UBA12294;s__Unclassified	Guizhou、Jiangsu	0	0	0	0	0	0	0	0	0	0	0	0	0	0	0	0	0	0	0	0	0	0	0	0	0	0	0	0.140108	0	0	0	0	0	0	0	0	0	0.529477	0	0	0	0	0	0	0	0	0.78039
MAG85	d__Bacteria;p__Bacteroidota;c__Bacteroidia;o__Bacteroidales;f__Dysgonomonadaceae;g__JAAYFB01;s__Unclassified	Sichuan	0	0	0	0	0	0	0	0	0	0	0	0	0.0180777	0	0.084881	0	0	0.0323615	0	0	0.381443	0	0.0306916	0.00621604	0	0	0	0	0	0	0	0	0	0	0	0	0	0	0	0	0	0	0	0	0	0	0
MAG850	d__Bacteria;p__Actinomycetota;c__Actinomycetia;o__Mycobacteriales;f__Mycobacteriaceae;g__Dietzia;s__Dietzia aurantiaca	Sichuan、Jiangsu	0.0198821	0	0.411563	0	0	0	0	0.259074	0	0	0	0	0.0071138	2.80455	0.0840308	0	0	0.0203635	0	0.135001	0.0477887	0	0.425377	0.0450338	0.112753	0	0	0	0	0	0	0	0	0	0	0	0	0	0	0	0	0	0	0	0	0	0
MAG851	d__Bacteria;p__Pseudomonadota;c__Alphaproteobacteria;o__Sphingomonadales;f__Sphingomonadaceae;g__Sphingomicrobium;s__Unclassified	Jiangsu	0	0	0	0	0	0	0	0	0	0	0	0	0	0	0	0	0	0	0	0	0	0	0	0	0	0	0	0	0	0	0	0	0	0	0	0	0	0	0	0	0	0	0	0	0	0	0
MAG852	d__Bacteria;p__Pseudomonadota;c__Gammaproteobacteria;o__Xanthomonadales;f__Rhodanobacteraceae;g__Oleiagrimonas;s__Unclassified	Sichuan	0	0	0	0	0	6.9582	0	0	0	0	0	0	0	0	0	0	0	0	0	0	0	0	0	0	0	0	0	0	0	0	0	0	0	0	0	0	0	0	0	0	0	0	0	0	0	0	0
MAG853	d__Bacteria;p__Bacillota;c__Bacilli;o__Bacillales_K;f__Sporolactobacillaceae;g__Unclassified;s__Unclassified	Sichuan	0	0	0	0.114259	0	2.74547	0	0	0	0	0	0	0	0	0	0	0	0	0	0	0	0	0	0	0	0	0	0	0	0	0	0	0	0	0	0	0	0	0	0	0	0	0	0	0	0	0
MAG854	d__Bacteria;p__Actinomycetota;c__Actinomycetia;o__JACCUZ01;f__JACCUZ01;g__Unclassified;s__Unclassified	Jiangsu	0	0	0	0	0	0	0	0	0	0	0	0	0	0	0	0	0	0	0	0	0	0	0	0	0	0	0	0	0	0	0	0	0	0	0	0	0	0	0	0	0	0	0	0	0	0	0
MAG855	d__Bacteria;p__Actinomycetota;c__Thermoleophilia;o__Gaiellales;f__Gaiellaceae;g__VAXT01;s__Unclassified	Guizhou	0	0	0	0	0	0	0	0	0	0	0	0	0	0	0	0	0	0	0	0	0	0	0	0	0	0	0	1.22057	0	6.55211	0	0	0.194163	0	0	0	0	0.263755	0	0	0	0	0.0786014	0.470818	0.551678	0	3.82281
MAG856	d__Bacteria;p__Pseudomonadota;c__Alphaproteobacteria;o__Sphingomonadales;f__Sphingomonadaceae;g__Aquisediminimonas;s__Unclassified	Sichuan	0	0	0	0	0	0	0	1.27514	0	0	3.13404	0	0	0	0.537181	0	3.11474	0	0	0	0	0	0	0	0	0	0	0	0	0	0	0	0	0	0	0	0	0	0	0	0	0	0	0	0	0	0
MAG857	d__Bacteria;p__Bacteroidota;c__Bacteroidia;o__Chitinophagales;f__Chitinophagaceae;g__Parasegetibacter;s__Unclassified	Yunnan	0	0	0	0	0	0	0	0	0	0	0	0	0	0	0	0	0	0	0	0	0	0	0	0	0	0	0	0	0	0	0	0	0	0	0	0	0	0	0	0	0	0	0	0	0	0	0
MAG858	d__Bacteria;p__Cyanobacteriota;c__Cyanobacteriia;o__Cyanobacteriales;f__Chroococcidiopsidaceae;g__Chroococcidiopsis;s__Unclassified	Sichuan、Guizhou、Jiangsu	0	0	0	0	0	0	0	0	0	0	0	0	0	0	0	0	0.103481	0	0	0	0	0	0	0	0	0	0	0	0	0.0900316	0.114189	0	0	0	0	0	0	7.39758	0	0.111908	0	0	0	0	0	0	0.186553
MAG859	d__Bacteria;p__Patescibacteria;c__Saccharimonadia;o__Saccharimonadales;f__UBA4665;g__Unclassified;s__Unclassified	Jiangsu	0	0	0	0	0	0	0	0	0	0	0	0	0	0	0	0	0	0	0	0	0	0	0	0	0	0	0	0	0	0	0	0	0	0	0	0	0	0	0	0	0	0	0	0	0	0	0
MAG86	d__Bacteria;p__Actinomycetota;c__Actinomycetia;o__Actinomycetales;f__Microbacteriaceae;g__Microbacterium;s__Microbacterium pullistercoris	Sichuan	0	0	0.0367352	0	0	0	0	0	0	0	0	0	0.0859738	0.267282	0.112779	0	0	0.0567004	0	0	0.212317	0	0	0.0212234	0.919515	0	0	0	0	0	0	0	0	0	0	0	0	0	0	0	0	0	0	0	0	0	0
MAG860	d__Bacteria;p__Pseudomonadota;c__Gammaproteobacteria;o__Pseudomonadales;f__Pseudomonadaceae;g__Thiopseudomonas;s__Thiopseudomonas sp012800475	Sichuan、Yunnan	0	0	0	0	0	0	0	0	0	0	0	0	0.640251	0	0	0	0	2.64405	0	0	0.380686	0	0	0.115458	0	0	0	0	0	0	0	0	0	0	0	0	0	0	0	0	0	0	0	0	0	0	0
MAG861	d__Bacteria;p__Tectomicrobia;c__Entotheonellia;o__Entotheonellales;f__Entotheonellaceae;g__SXND01;s__Unclassified	Guizhou、Yunnan	0	0	0	0	0	0	0	0	0	0	0	0	0	0	0	0	0	0	0	0	0	0	0	0	0	0.237483	0	0.152981	0.439069	0.579415	0.260059	0.242251	1.87982	0	0.739511	0.213688	0.760296	0	0.287089	0.233413	0	0.635325	0.294066	3.30918	2.03495	0.978535	0
MAG862	d__Bacteria;p__Pseudomonadota;c__Alphaproteobacteria;o__Sphingomonadales;f__Sphingomonadaceae;g__Allosphingosinicella;s__Unclassified	Yunnan	0	0	0	0	0	0	0	0	0	0	0	0	0	0	0	0	0	0	0	0	0	0	0	0	0	0	0	0	0	0	0	0	0	0	0	0	0	0	0	0	0	0	0	0	0	0	0
MAG863	d__Bacteria;p__Bacillota;c__Bacilli;o__Bacillales;f__Planococcaceae;g__Sporosarcina;s__Sporosarcina sp003351785	Sichuan	0	0	0	0	0	0	0	0	0	0	0	0	0	0.573982	0	0	0	0.102825	0	0	0	0	0.20718	0.0172011	0	0	0	0	0	0	0	0	0	0	0	0	0	0	0	0	0	0	0	0	0	0	0
MAG864	d__Bacteria;p__Bacteroidota;c__Bacteroidia;o__Cytophagales;f__Hymenobacteraceae;g__Hymenobacter;s__Unclassified	Sichuan、Yunnan	0	0.509104	0	0	0.165904	0	0	2.40375	0.285865	0.566181	0.581195	0	0	0	3.20268	0	1.38305	0	0.0209359	1.36597	0	5.19658	0	0	0	0	0	0	0	0	0	0	0	0	0	0	0	0	0	0	0	0	0	0	0	0	0
MAG865	d__Bacteria;p__Actinomycetota;c__Actinomycetia;o__Actinomycetales;f__Brevibacteriaceae;g__Brevibacterium;s__Brevibacterium intestinigallinarum	Sichuan	0	0	0.306212	0	0	0	0	0	0	0	0	0	0	0.430649	0.0516724	0	0	0.00844311	0	0	0.0458856	0	0.0155293	0.0163337	0	0	0	0	0	0	0	0	0	0	0	0	0	0	0	0	0	0	0	0	0	0	0
MAG866	d__Bacteria;p__Actinomycetota;c__Thermoleophilia;o__Solirubrobacterales;f__70-9;g__VAYN01;s__Unclassified	Jiangsu	0	0	0	0	0	0	0	0	0	0	0	0	0	0	0	0	0	0	0	0	0	0	0	0	0	0	0	0	0	0	0	0	0	0	0	0	0	0	0	0	0	0	0	0	0	0	0
MAG867	d__Bacteria;p__Bacillota;c__Bacilli;o__Staphylococcales;f__Salinicoccaceae;g__Aliicoccus;s__Unclassified	Sichuan	0	0	0.0288143	0	0	0	0	0	0	0.187229	0	0	0.0636738	0.0807644	0.0900089	0	0	0.0841124	0	0	0.342512	0	0	0.0377139	0.0822205	0	0	0	0	0	0	0	0	0	0	0	0	0	0	0	0	0	0	0	0	0	0
MAG868	d__Bacteria;p__Pseudomonadota;c__Alphaproteobacteria;o__Rhodobacterales;f__Rhodobacteraceae;g__Paracoccus;s__Unclassified	Sichuan	0	0	0.187503	0	0	0	0	0	0	0	0	0	0	0	0	0	0	0	0	0	0	0	0	0	0	0	0	0	0	0	0	0	0	0	0	0	0	0	0	0	0	0	0	0	0	0	0
MAG869	d__Bacteria;p__Bacteroidota;c__Bacteroidia;o__Flavobacteriales;f__Flavobacteriaceae;g__JAJYTI01;s__Unclassified	Sichuan	0	0	0	0	0	0	0	0	0	0	0	0	0.531746	0	0	0.209544	0	0.278823	0	0	0.101931	0	0	0.089129	0	0	0	0	0	0	0	0	0	0	0	0	0	0	0	0	0	0	0	0	0	0	0
MAG87	d__Bacteria;p__Cyanobacteriota;c__Cyanobacteriia;o__Cyanobacteriales;f__Xenococcaceae;g__Waterburya;s__Unclassified	Sichuan、Guizhou	0	0	0	0.109428	0.468115	0	0	2.4635	3.08401	0.205652	0.199541	0	0	0	0.351952	0	0.239532	0	0	1.02017	0	0.446313	0	0	0	0	0	0	0	0	0	0	0	0	0	0	0	0.196084	0	0	0	0.177681	0.0960262	0	0	0	0
MAG870	d__Bacteria;p__Actinomycetota;c__Actinomycetia;o__Propionibacteriales;f__Propionibacteriaceae;g__Aestuariimicrobium;s__Unclassified	Sichuan	0.0160974	0	0.479063	0	0	0	0	0	0	0	0	0	0	0	0	0	0	0	0.0242321	0	0	0	0.113662	0	0	0	0	0	0	0	0	0	0	0	0	0	0	0	0	0	0	0	0	0	0	0	0
MAG871	d__Bacteria;p__Actinomycetota;c__Thermoleophilia;o__Solirubrobacterales;f__70-9;g__RHKX01;s__Unclassified	Sichuan、Guizhou、Jiangsu	0	0	0	0	0	0	0	0	0	0.182826	0	0	0	0	0	0	0	0	0	0.205279	0	0	0	0	0	0	0	0	0	0	0	0	0.114926	0	0	0	0	0	0	0	0	0.104988	0	0.105579	0	0	0
MAG872	d__Bacteria;p__Actinomycetota;c__Actinomycetia;o__Actinomycetales;f__Actinomycetaceae;g__Scrofimicrobium;s__Unclassified	Sichuan	0	0	0.568236	0	0	0	0	0	0	0	0	0	0	0	0	0	0	0	0	0	0.0189554	0	0.0440141	0	0	0	0	0	0	0	0	0	0	0	0	0	0	0	0	0	0	0	0	0	0	0	0
MAG873	d__Bacteria;p__Actinomycetota;c__Actinomycetia;o__Propionibacteriales;f__Propionibacteriaceae;g__Aestuariimicrobium;s__Aestuariimicrobium sp017355265	Sichuan、Jiangsu	0.53738	0	0	0.288639	0	0.0424757	0	0.130515	0.192868	0	0	0	0	0.0148203	0.0662199	0	0.103763	0	0.626497	0	0	0	0.100347	0	0	0	0	0	0	0	0	0	0	0	0	0	0	0	0	0	0	0	0	0	0	0	0
MAG874	d__Bacteria;p__Chloroflexota;c__Chloroflexia;o__Thermomicrobiales;f__UBA6265;g__UBA6265;s__Unclassified	Sichuan	0.0231561	0	0.59743	0	0	0	0	0	0	0	0	0	0.0162803	0.332108	0.124601	0	0	0.00773852	0	0	0.0573186	0	0.0374501	0	0.107092	0	0	0	0	0	0	0	0	0	0	0	0	0	0	0	0	0	0	0	0	0	0
MAG875	d__Bacteria;p__Actinomycetota;c__Thermoleophilia;o__Gaiellales;f__Gaiellaceae;g__JACCRW01;s__Unclassified	Guizhou、Yunnan	0	0	0	0	0	0	0	0	0	0	0	0	0	0	0	0	0	0	0	0	0	0	0	0	0	0	0	0	0	0	0	0	0	0.228082	0	0	0	0	0	0	0	0	0	0	0	0	0
MAG876	d__Bacteria;p__Pseudomonadota;c__Alphaproteobacteria;o__Sphingomonadales;f__Sphingomonadaceae;g__Allosphingosinicella;s__Unclassified	Yunnan	0	0	0	0	0	0	0	0	0	0	0	0	0	0	0	0	0	0	0	0	0	0	0	0	0	0	0	0	0	0	0	0	0	0	0	0	0	0	0	0	0	0	0	0	0	0	0
MAG877	d__Bacteria;p__Pseudomonadota;c__Alphaproteobacteria;o__Sphingomonadales;f__Sphingomonadaceae;g__Sphingomicrobium;s__Unclassified	Yunnan	0	0	0	0	0	0	0	0	0	0	0	0	0	0	0	0	0	0	0	0	0	0	0	0	0	0	0	0	0	0	0	0	0	0	0	0	0	0	0	0	0	0	0	0	0	0	0
MAG878	d__Bacteria;p__Pseudomonadota;c__Alphaproteobacteria;o__Rhodobacterales;f__Rhodobacteraceae;g__Paracoccus;s__Unclassified	Sichuan	0.415098	0	0.0178864	0.190471	0	0.0607011	0	0.072225	0	0	0	0	0	0	0	0	0	0	0.626498	0	0	0	0.150046	0	0	0	0	0	0	0	0	0	0	0	0	0	0	0	0	0	0	0	0	0	0	0	0
MAG879	d__Bacteria;p__Acidobacteriota;c__Vicinamibacteria;o__Vicinamibacterales;f__2-12-FULL-66-21;g__2-12-FULL-66-21;s__Unclassified	Guizhou、Yunnan	0	0	0	0	0	0	0	0	0	0	0	0	0	0	0	0	0	0	0	0	0	0	0	0	0	0	0	0	0	0	0	0	0	0.349484	0	0	0	0	0	0	0	0	0	0	0	0	0
MAG88	d__Bacteria;p__Actinomycetota;c__Actinomycetia;o__Mycobacteriales;f__Jatrophihabitantaceae;g__Jatrophihabitans;s__Unclassified	Yunnan	0	0	0	0	0	0	0	0	0	0	0	0	0	0	0	0	0	0	0	0	0	0	0	0	0	0	0	0	0	0	0	0	0	0	0	0	0	0	0	0	0	0	0	0	0	0	0
MAG880	d__Bacteria;p__Bacteroidota;c__Bacteroidia;o__Chitinophagales;f__Chitinophagaceae;g__Hanamia;s__Unclassified	Jiangsu	0	0	0	0	0	0	0	0	0	0	0	0	0	0	0	0	0	0	0	0	0	0	0	0	0	0	0	0	0	0	0	0	0	0	0	0	0	0	0	0	0	0	0	0	0	0	0
MAG881	d__Bacteria;p__Actinomycetota;c__Actinomycetia;o__Actinomycetales;f__Micrococcaceae;g__Nesterenkonia;s__Unclassified	Sichuan	0	0	0	0	0	0	0	0	0	0	0	0	0	0.893268	0	0	0	0	0	0	0	0	0	0	0	0	0	0	0	0	0	0	0	0	0	0	0	0	0	0	0	0	0	0	0	0	0
MAG882	d__Bacteria;p__Actinomycetota;c__Actinomycetia;o__Actinomycetales;f__Microbacteriaceae;g__Microbacterium;s__Unclassified	Sichuan、Jiangsu	0	0.117631	0	0	0	0	0	0	0	0	0	0	0	0	0	0	0	0	0	0	0	0	0	0	0	0	0	0	0	0	0	0	0	0	0	0	0	0	0	0	0	0	0	0	0	0	0
MAG883	d__Bacteria;p__Actinomycetota;c__Thermoleophilia;o__Solirubrobacterales;f__70-9;g__VAYN01;s__Unclassified	Sichuan、Guizhou、Yunnan、Jiangsu	0	0	0	0	0.194947	0.0498083	0	0	0	0.0922428	0	0	0	0	0	0.275968	0.0669919	0	0	0.170095	0	0.13084	0	0	0.174001	0	0	0	0	0	0	0	0	0	0	0	0	0	0	0	0	0	0	0	0	0	0
MAG884	d__Bacteria;p__Pseudomonadota;c__Gammaproteobacteria;o__Pseudomonadales;f__Moraxellaceae;g__Acinetobacter;s__Unclassified	Guizhou	0	0	0	0	0	0	0	0	0	0	0	0	0	0	0	0	0	0	0	0	0	0	0	0	0	0	0	0	0	0	0	0.395066	0	0	0	0	0	0	0	0	0	0.366742	8.6652	0	0	0	0
MAG885	d__Bacteria;p__Actinomycetota;c__Actinomycetia;o__Actinomycetales;f__Dermatophilaceae;g__Flexivirga;s__Unclassified	Sichuan、Jiangsu	0	0	0	0.0938087	0	0	0	0	0	0	0	0	0	0	0	0	0	0	0	0	0	0	0	0	0	0	0	0	0	0	0	0	0	0	0	0	0	0	0	0	0	0	0	0	0	0	0
MAG886	d__Bacteria;p__Actinomycetota;c__Actinomycetia;o__Mycobacteriales;f__Mycobacteriaceae;g__Corynebacterium;s__Corynebacterium casei	Sichuan、Yunnan	0	0	6.14707	0	0	0	0	0.160618	0	0	0	0	0.0948366	0.142562	0.17323	0	0	0.13992	0	0	0.30208	0	0.308278	0.111906	0.331546	0	0	0	0	0	0	0	0	0	0	0	0	0	0	0	0	0	0	0	0	0	0
MAG887	d__Bacteria;p__Bacillota;c__Bacilli;o__Staphylococcales;f__Salinicoccaceae;g__Jeotgalicoccus;s__Unclassified	Sichuan、Yunnan、Jiangsu	0.321531	0	0.0767907	0	0	0	0	0.0662541	0	0	0	0	0.0169179	0.0725612	0	0	0	0.118025	0	0	0.157112	0	0.0170866	0.113885	0	0	0	0	0	0	0	0	0	0	0	0	0	0	0	0	0	0	0	0	0	0	0
MAG888	d__Bacteria;p__Pseudomonadota;c__Alphaproteobacteria;o__Rhizobiales;f__Xanthobacteraceae;g__Bradyrhizobium;s__Unclassified	Yunnan	0	0	0	0	0	0	0	0	0	0	0	0	0	0	0	0	0	0	0	0	0	0	0	0	0	0	0	0	0	0	0	0	0	0	0	0	0	0	0	0	0	0	0	0	0	0	0
MAG889	d__Bacteria;p__Pseudomonadota;c__Alphaproteobacteria;o__Sphingomonadales;f__Sphingomonadaceae;g__Sphingomicrobium;s__Unclassified	Guizhou	0	0	0	0	0	0	0	0	0	0	0	0	0	0	0	0	0	0	0	0	0	0	0	0	0	0	0	0	0	0	0	0	0	0	0	0	0	0	0	0	0	0	0	0	0	0	0.529355
MAG89	d__Bacteria;p__Pseudomonadota;c__Gammaproteobacteria;o__Xanthomonadales;f__Xanthomonadaceae;g__Arenimonas;s__Unclassified	Jiangsu	0	0	0	0	0	0	0	0	0	0	0	0	0	0	0	0	0	0	0	0	0	0	0	0	0	0	0	0	0	0	0	0	0	0	0	0	0	0	0	0	0	0	0	0	0	0	0
MAG890	d__Bacteria;p__Bacillota;c__Bacilli;o__Erysipelotrichales;f__Erysipelotrichaceae;g__Erysipelothrix;s__Unclassified	Sichuan	0	0	0	0	0	0	0	0	0	0	0	0	0.37071	0	0	0	0	0.0616878	0	0	0.351978	0	0	0	0	0	0	0	0	0	0	0	0	0	0	0	0	0	0	0	0	0	0	0	0	0	0
MAG891	d__Bacteria;p__Myxococcota;c__Myxococcia;o__Myxococcales;f__Anaeromyxobacteraceae;g__Anaeromyxobacter;s__Unclassified	Guizhou	0	0	0	0	0	0	0	0	0	0	0	0	0	0	0	0	0	0	0	0	0	0	0	0	0	0	0	0	0	0.130634	0	0	0	0	0	0	0	0	0	0	0	0	0	0	0	0	1.17822
MAG892	d__Bacteria;p__Bacteroidota;c__Bacteroidia;o__Flavobacteriales;f__Flavobacteriaceae;g__Flavobacterium;s__Unclassified	Sichuan、Guizhou	0.368049	0.0734715	0	0	0.120472	0	0.417056	0.257867	0.628443	0.256318	0	0	0	0.125878	0	0.0694283	0	0	0.236389	0	0	1.38096	0.303354	0	0.217758	0	0	0	0	0	0	0.223163	0	0	0	0	0	0	0	0	0	1.06157	0.136818	0	0	0	0
MAG893	d__Bacteria;p__Nitrospirota;c__Nitrospiria;o__Nitrospirales;f__Nitrospiraceae;g__Nitrospira_F;s__Unclassified	Sichuan、Guizhou	0	0	0	0	0.0667587	0	0	0	0.215066	0.553559	0	0.212979	0	0	0	0.0930656	0	0	0	0.31856	0	0	0	0	0	0.873437	0.283433	0	0.401505	0.466476	0.861766	0.275246	0.798922	0	1.70709	0.264092	3.17549	0.17292	0	0.187116	0.227103	0.226729	0.38553	0.400758	1.14198	0.318932	0
MAG894	d__Bacteria;p__Bacteroidota;c__Bacteroidia;o__Chitinophagales;f__Chitinophagaceae;g__Flavisolibacter;s__Unclassified	Jiangsu	0	0	0	0	0	0	0	0	0	0	0	0	0	0	0	0	0	0	0	0	0	0	0	0	0	0	0	0	0	0	0	0	0	0	0	0	0	0	0	0	0	0	0	0	0	0	0
MAG895	d__Bacteria;p__Pseudomonadota;c__Alphaproteobacteria;o__Rhodobacterales;f__Rhodobacteraceae;g__Paracoccus;s__Unclassified	Sichuan	0.110977	0.0618694	1.0112	0	0	0	0	0	0	0	0	0	0.00744305	0.0622071	0.069905	0	0	0	0.0579079	0	0.0122908	0	0.0517417	0	0.0981091	0	0	0	0	0	0	0	0	0	0	0	0	0	0	0	0	0	0	0	0	0	0
MAG896	d__Bacteria;p__Actinomycetota;c__Actinomycetia;o__Propionibacteriales;f__Nocardioidaceae;g__Nocardioides;s__Unclassified	Sichuan	0	0	0	2.48678	0	7.86097	0.195821	0	0.311149	0	0.159048	0	0	0	0	0	0	0	0	0	0	0	0	0	0	0	0	0	0	0	0	0	0	0	0	0	0	0	0	0	0	0	0	0	0	0	0
MAG897	d__Bacteria;p__Actinomycetota;c__Thermoleophilia;o__Gaiellales;f__Gaiellaceae;g__JACCRW01;s__Unclassified	Guizhou、Yunnan	0	0	0	0	0	0	0	0	0	0	0	0	0	0	0	0	0	0	0	0	0	0	0	0	0	0	0	0	0	0	0	0	0	0.288885	0	0.210722	0	0	0	0	0	0	0	0	0	0	0
MAG898	d__Bacteria;p__Pseudomonadota;c__Gammaproteobacteria;o__Burkholderiales;f__Burkholderiaceae_A;g__Unclassified;s__Unclassified	Sichuan	0	0	0	0	0	0	0	0.877618	1.28846	0	0.161535	0	0	0	0.563314	0	3.25526	0	0	0	0	0.0544642	0	0	0	0	0	0	0	0	0	0	0	0	0	0	0	0	0	0	0	0	0	0	0	0	0
MAG899	d__Bacteria;p__Bacteroidota;c__Bacteroidia;o__Cytophagales;f__Spirosomaceae;g__Spirosoma;s__Unclassified	Sichuan	0	0	0	0	0	0	0	0.125152	0.288323	0	0.241049	0	0	0	1.43048	0	1.22764	0	0	0.0814819	0	0.114822	0	0	0	0	0	0	0	0	0	0	0	0	0	0	0	0	0	0	0	0	0	0	0	0	0
MAG9	d__Bacteria;p__Bacteroidota;c__Bacteroidia;o__Chitinophagales;f__Chitinophagaceae;g__Hanamia;s__Unclassified	Jiangsu	0	0	0	0	0	0	0	0	0	0	0	0	0	0	0	0	0	0	0	0	0	0	0	0	0	0	0	0	0	0	0	0	0	0	0	0	0	0	0	0	0	0	0	0	0	0	0
MAG90	d__Bacteria;p__Bacteroidota;c__Bacteroidia;o__Flavobacteriales;f__Flavobacteriaceae;g__JAJYTI01;s__Unclassified	Sichuan	0	0	0	0	0	0	0	0	0	0	0	0	0.496449	0	0	0	0	0.126217	0	0	0.117343	0	0	0	0	0	0	0	0	0	0	0	0	0	0	0	0	0	0	0	0	0	0	0	0	0	0
MAG900	d__Bacteria;p__Gemmatimonadota;c__Gemmatimonadetes;o__Longimicrobiales;f__Longimicrobiaceae;g__Longimicrobium;s__Unclassified	Yunnan	0	0	0	0	0	0	0	0	0	0	0	0	0	0	0	0	0	0	0	0	0	0	0	0	0	0	0	0	0	0	0	0	0	0	0	0	0	0	0	0	0	0	0	0	0	0	0
MAG901	d__Bacteria;p__Pseudomonadota;c__Gammaproteobacteria;o__Burkholderiales;f__Burkholderiaceae_C;g__Paenalcaligenes;s__Unclassified	Sichuan、Yunnan	0	0	0	0	0	0	0	0	0	0	0	0	0.710267	0	0	0	0	0.158194	0	0	0.197147	0	0	0.550871	0	0	0	0	0	0	0	0	0	0	0	0	0	0	0	0	0	0	0	0	0	0	0
MAG902	d__Bacteria;p__Actinomycetota;c__Thermoleophilia;o__Solirubrobacterales;f__Solirubrobacteraceae;g__Palsa-465;s__Unclassified	Yunnan	0	0	0	0	0	0	0	0	0	0	0	0	0	0	0	0	0	0	0	0	0	0	0	0	0	0	0	0	0	0	0	0	0	0	0	0	0	0	0	0	0	0	0	0	0	0	0
MAG903	d__Bacteria;p__Actinomycetota;c__Actinomycetia;o__Actinomycetales;f__Dermatophilaceae;g__Unclassified;s__Unclassified	Sichuan、Yunnan	0.0169744	0	0.0175627	0	0	0	0	0	0	0	0	0	0	0	0	0	0	0	0.0473324	0	0	0	2.01816	0	0	0	0	0	0	0	0	0	0	0	0	0	0	0	0	0	0	0	0	0	0	0	0
MAG904	d__Bacteria;p__Actinomycetota;c__Actinomycetia;o__Actinomycetales;f__Dermatophilaceae;g__Flexivirga;s__Unclassified	Jiangsu	0	0	0	0	0	0	0	0	0	0	0	0	0	0	0	0	0	0	0	0	0	0	0	0	0	0	0	0	0	0	0	0	0	0	0	0	0	0	0	0	0	0	0	0	0	0	0
MAG905	d__Bacteria;p__Gemmatimonadota;c__Gemmatimonadetes;o__Longimicrobiales;f__Longimicrobiaceae;g__Longimicrobium;s__Unclassified	Jiangsu	0	0	0	0	0	0	0	0	0	0	0	0	0	0	0	0	0	0	0	0	0	0	0	0	0	0	0	0	0	0	0	0	0	0	0	0	0	0	0	0	0	0	0	0	0	0	0
MAG906	d__Bacteria;p__Pseudomonadota;c__Gammaproteobacteria;o__Enterobacterales_A;f__Aeromonadaceae;g__Oceanisphaera;s__Unclassified	Sichuan、Yunnan	0	0	0.00891616	0	0	0	0	0	0	0	0	0	2.31268	0	0.0903336	0	0	4.27796	0	0	0.969052	0	0	0.565479	0	0	0	0	0	0	0	0	0	0	0	0	0	0	0	0	0	0	0	0	0	0	0
MAG907	d__Bacteria;p__Actinomycetota;c__Actinomycetia;o__Mycobacteriales;f__Mycobacteriaceae;g__Corynebacterium;s__Corynebacterium sp012838985	Sichuan	0	0	0	0	0	0	0	0	0	0	0	0	0	2.27026	0	0	0	0	0	0	0	0	0	0	0	0	0	0	0	0	0	0	0	0	0	0	0	0	0	0	0	0	0	0	0	0	0
MAG908	d__Bacteria;p__Acidobacteriota;c__Blastocatellia;o__Pyrinomonadales;f__Pyrinomonadaceae;g__OLB17;s__Unclassified	Sichuan	0	0.434038	0	0.0547885	1.14574	0.0794328	0.656076	0	0.284308	0.623978	0	0.175256	0	0	0.066908	0.950134	0	0	0	0.898497	0	0.191194	0	0	0.328608	0	0	0	0	0	0	0	0	0	0	0	0	0	0	0	0	0	0	0	0	0	0
MAG909	d__Bacteria;p__Pseudomonadota;c__Gammaproteobacteria;o__Steroidobacterales;f__Steroidobacteraceae;g__ZC4RG30;s__Unclassified	Jiangsu	0	0	0	0	0	0	0	0	0	0	0	0	0	0	0	0	0	0	0	0	0	0	0	0	0	0	0	0	0	0	0	0	0	0	0	0	0	0	0	0	0	0	0	0	0	0	0
MAG91	d__Bacteria;p__Pseudomonadota;c__Gammaproteobacteria;o__Steroidobacterales;f__Steroidobacteraceae;g__Povalibacter;s__Unclassified	Jiangsu	0	0	0	0	0	0	0	0	0	0	0	0	0	0	0	0	0	0	0	0	0	0	0	0	0	0	0	0	0	0	0	0	0	0	0	0	0	0	0	0	0	0	0	0	0	0	0
MAG910	d__Bacteria;p__Myxococcota;c__Myxococcia;o__Myxococcales;f__Myxococcaceae;g__Unclassified;s__Unclassified	Yunnan	0	0	0	0	0	0	0	0	0	0	0	0	0	0	0	0	0	0	0	0	0	0	0	0	0	0	0	0	0	0	0	0	0	0	0	0	0	0	0	0	0	0	0	0	0	0	0
MAG911	d__Bacteria;p__Actinomycetota;c__Actinomycetia;o__Actinomycetales;f__Cellulomonadaceae;g__Timonella;s__Unclassified	Sichuan、Yunnan	0	0	0.0306061	0	0	0	0	0	0	0	0	0	1.71937	0	0.147495	0	0	0.725917	0	0	1.0641	0	0.0177036	2.52879	0.140328	0	0	0	0	0	0	0	0	0	0	0	0	0	0	0	0	0	0	0	0	0	0
MAG912	d__Bacteria;p__Bacillota;c__Bacilli;o__Lactobacillales;f__Aerococcaceae;g__Fundicoccus;s__Unclassified	Sichuan	0	0	0	0	0	0	0	0	0	0	0	0	0.188911	0	0	0	0	0.0730079	0	0	0.371416	0	0	0.0891533	0	0	0	0	0	0	0	0	0	0	0	0	0	0	0	0	0	0	0	0	0	0	0
MAG913	d__Bacteria;p__Pseudomonadota;c__Alphaproteobacteria;o__Rhodobacterales;f__Rhodobacteraceae;g__Amaricoccus;s__Unclassified	Sichuan、Guizhou	0	0	0	0	0	0	0	0.107015	0	0	12.1463	0	0	0	0.140373	0	0.112405	0	0	0	0	0	0	0	0	0	0	0	0	0	0.115984	0	0	0	0	0	0	0	0	0	0.204564	0	0	0	0	0	0
MAG914	d__Bacteria;p__Pseudomonadota;c__Gammaproteobacteria;o__Pseudomonadales;f__Cellvibrionaceae;g__Cellvibrio;s__Unclassified	Sichuan	0	0	0.166007	0	0	0	0	0	0	0	0	0	0	0.856156	0	0	0	0	0	0	0	0	0.0763507	0	0	0	0	0	0	0	0	0	0	0	0	0	0	0	0	0	0	0	0	0	0	0	0
MAG915	d__Bacteria;p__Actinomycetota;c__Actinomycetia;o__Mycobacteriales;f__Mycobacteriaceae;g__Gordonia;s__Unclassified	Sichuan	0.323238	0.0718003	0.243083	0.559305	0	0.0406847	0	0	0	0	0	0	0	0	0	0	0	0	0.738135	0	0	0	0.0310953	0	0	0	0	0	0	0	0	0	0	0	0	0	0	0	0	0	0	0	0	0	0	0	0
MAG916	d__Bacteria;p__Bacteroidota;c__Bacteroidia;o__Chitinophagales;f__Chitinophagaceae;g__Niabella;s__Niabella sp023423285	Sichuan、Jiangsu	0.0914479	0	0.00886586	0.108216	0	0.0570316	0	0.190265	0.140987	0	0	0	0	0	0	0	0.0983954	0	0.698357	0	0	0	0.362639	0	0	0	0	0	0	0	0	0	0	0	0	0	0	0	0	0	0	0	0	0	0	0	0
MAG917	d__Bacteria;p__Bacillota_A;c__Clostridia;o__Tissierellales;f__Gottschalkiaceae;g__Andreesenia;s__Unclassified	Sichuan	0.348992	0	0	0.633018	0	0.0521573	0	0	0	0	0	0	0	0	0	0	0	0	1.84988	0	0	0	0	0	0	0	0	0	0	0	0	0	0	0	0	0	0	0	0	0	0	0	0	0	0	0	0
MAG918	d__Bacteria;p__Actinomycetota;c__Actinomycetia;o__Mycobacteriales;f__Mycobacteriaceae;g__Mycobacterium;s__Unclassified	Yunnan	0	0	0	0	0	0	0	0	0	0	0	0	0	0	0	0	0	0	0	0	0	0	0	0	0	0	0	0	0	0	0	0	0	0	0	0	0	0	0	0	0	0	0	0	0	0	0
MAG919	d__Bacteria;p__Actinomycetota;c__Actinomycetia;o__Actinomycetales;f__Microbacteriaceae;g__Leucobacter;s__Unclassified	Sichuan	0	0	0.0435095	0	0	0	0	0	0	0	0	0	0.181139	0	0	0	0	0.144746	0	0	0.1361	0	0	0.262129	0	0	0	0	0	0	0	0	0	0	0	0	0	0	0	0	0	0	0	0	0	0	0
MAG92	d__Bacteria;p__Actinomycetota;c__Actinomycetia;o__Actinomycetales;f__Micrococcaceae;g__Glutamicibacter;s__Glutamicibacter protophormiae	Sichuan、Guizhou、Jiangsu	9.44796	0	0.128411	5.37732	0.166083	0.840735	0.293834	0.18213	0.376709	0.152128	0	0	0	0.0626777	0.0604299	0	0	0.0208191	6.64358	0.0719027	0.0105452	0.0685251	0.484265	0.0529485	0.275212	0	0	0	0	0	0	0	0	0	0	0	0	0	0	0	0	0.261233	0.0757372	0	0	0	0
MAG920	d__Bacteria;p__Pseudomonadota;c__Gammaproteobacteria;o__Pseudomonadales;f__Moraxellaceae;g__Acinetobacter;s__Unclassified	Sichuan	0	0	0	0	0	0	0	0	0	0	0	0	0.00970571	0	0	0	0	0.392009	0	0	0.0162094	0	0	0	0	0	0	0	0	0	0	0	0	0	0	0	0	0	0	0	0	0	0	0	0	0	0
MAG921	d__Bacteria;p__Actinomycetota;c__Thermoleophilia;o__Solirubrobacterales;f__Thermoleophilaceae;g__Unclassified;s__Unclassified	Jiangsu	0	0	0	0	0	0	0	0	0	0	0	0	0	0	0	0	0	0	0	0	0	0	0	0	0	0	0	0	0	0	0	0	0	0	0	0	0	0	0	0	0	0	0	0	0	0	0
MAG922	d__Bacteria;p__Patescibacteria;c__Saccharimonadia;o__Saccharimonadales;f__UBA5946;g__Unclassified;s__Unclassified	Jiangsu	0	0	0	0	0	0	0	0	0	0	0	0	0	0	0	0	0	0	0	0	0	0	0	0	0	0	0	0	0	0	0	0	0	0	0	0	0	0	0	0	0	0	0	0	0	0	0
MAG923	d__Bacteria;p__Pseudomonadota;c__Gammaproteobacteria;o__Burkholderiales;f__Burkholderiaceae_B;g__Ramlibacter;s__Unclassified	Yunnan	0	0	0	0	0	0	0	0	0	0	0	0	0	0	0	0	0	0	0	0	0	0	0	0	0	0	0	0	0	0	0	0	0	0	0	0	0	0	0	0	0	0	0	0	0	0	0
MAG924	d__Bacteria;p__Bacteroidota;c__Bacteroidia;o__Cytophagales;f__Cyclobacteriaceae;g__Algoriphagus;s__Unclassified	Sichuan	0.125194	0	0	0	0	0.0553978	0	0	0	0	0	0	0	0	0	0	0	0	0.220682	0	0	0	0.606111	0	0	0	0	0	0	0	0	0	0	0	0	0	0	0	0	0	0	0	0	0	0	0	0
MAG925	d__Bacteria;p__Pseudomonadota;c__Gammaproteobacteria;o__Xanthomonadales;f__Xanthomonadaceae;g__Thermomonas;s__Unclassified	Sichuan	0.031277	0	0	0	0	0	0	0	0.220735	0	0	0	0	0	0	0	0	0	0.350731	0	0	0	0.650998	0	0	0	0	0	0	0	0	0	0	0	0	0	0	0	0	0	0	0	0	0	0	0	0
MAG926	d__Bacteria;p__Actinomycetota;c__Actinomycetia;o__Actinomycetales;f__Microbacteriaceae;g__Unclassified;s__Unclassified	Sichuan	0	0	0.368614	0	0	0	0	0	0	0	0	0	0	0	0	0	0	0	0	0	0	0	0.0184525	0	0	0	0	0	0	0	0	0	0	0	0	0	0	0	0	0	0	0	0	0	0	0	0
MAG927	d__Bacteria;p__Actinomycetota;c__Thermoleophilia;o__Gaiellales;f__Gaiellaceae;g__GMQP-bins7;s__Unclassified	Sichuan、Jiangsu	0	0	0	0	2.3481	0	0	0	0.143704	0.656926	0	0	0	0	0.0568073	2.42564	0	0	0	1.5416	0	0.440186	0	0	0	0	0	0	0	0	0	0	0	0	0	0	0	0	0	0	0	0	0	0	0	0	0
MAG928	d__Bacteria;p__Bacteroidota;c__Bacteroidia;o__Bacteroidales;f__Dysgonomonadaceae;g__UBA2632;s__UBA2632 sp012840785	Sichuan	0	0	0	0	0	0	0	0	0	0	0	0	0.0559158	0	0	0	0	0.0526784	0	0	0.711496	0	0	0.0566104	0	0	0	0	0	0	0	0	0	0	0	0	0	0	0	0	0	0	0	0	0	0	0
MAG929	d__Bacteria;p__Cyanobacteriota;c__Cyanobacteriia;o__Cyanobacteriales;f__Chroococcidiopsidaceae;g__Chroococcidiopsis;s__Chroococcidiopsis thermalis	Sichuan、Guizhou、Yunnan、Jiangsu	0	0	0	0	0.134489	0	0	3.21955	2.90938	0.740652	0.229268	0	0	0	1.0047	0	2.49719	0	0	2.7747	0	4.5997	0	0	0	0	0	0	0	0	0	0	0	0	0	0	0	0.873778	0	0	0	0	0	0	0	0	0
MAG93	d__Bacteria;p__Patescibacteria;c__Saccharimonadia;o__Saccharimonadales;f__UBA1547;g__JAEWBQ01;s__Unclassified	Yunnan	0	0	0	0	0	0	0	0	0	0	0	0	0	0	0	0	0	0	0	0	0	0	0	0	0	0	0	0	0	0	0	0	0	0	0	0	0	0	0	0	0	0	0	0	0	0	0
MAG930	d__Bacteria;p__Acidobacteriota;c__Blastocatellia;o__Pyrinomonadales;f__Pyrinomonadaceae;g__UBA11740;s__Unclassified	Jiangsu	0	0	0	0	0	0	0	0	0	0	0	0	0	0	0	0	0	0	0	0	0	0	0	0	0	0	0	0	0	0	0	0	0	0	0	0	0	0	0	0	0	0	0	0	0	0	0
MAG931	d__Bacteria;p__Chloroflexota;c__Limnocylindria;o__Limnocylindrales;f__CSP1-4;g__SPCO01;s__Unclassified	Yunnan	0	0	0	0	0	0	0	0	0	0	0	0	0	0	0	0	0	0	0	0	0	0	0	0	0	0	0	0	0	0	0	0	0	0	0	0	0	0	0	0	0	0	0	0	0	0	0
MAG932	d__Bacteria;p__Bacteroidota;c__Bacteroidia;o__Sphingobacteriales;f__Sphingobacteriaceae;g__Mucilaginibacter;s__Unclassified	Jiangsu	0	0	0	0	0	0	0	0	0	0	0	0	0	0	0	0	0	0	0	0	0	0	0	0	0	0	0	0	0	0	0	0	0	0	0	0	0	0	0	0	0	0	0	0	0	0	0
MAG933	d__Bacteria;p__Acidobacteriota;c__Thermoanaerobaculia;o__UBA5704;f__UBA5704;g__UBA5704;s__Unclassified	Jiangsu	0	0	0	0	0	0	0	0	0	0	0	0	0	0	0	0	0	0	0	0	0	0	0	0	0	0	0	0	0	0	0	0	0	0	0	0	0	0	0	0	0	0	0	0	0	0	0
MAG934	d__Bacteria;p__Pseudomonadota;c__Alphaproteobacteria;o__Rhizobiales;f__Xanthobacteraceae;g__PALSA-894;s__Unclassified	Guizhou、Jiangsu	0	0	0	0	0	0	0	0	0	0	0	0	0	0	0	0	0	0	0	0	0	0	0	0	0	0	0	0	0	0.288749	0	0	0.254344	0	0	0	0.0973732	0	0	0	0	0	0	0.186708	0.329107	0	1.72953
MAG935	d__Bacteria;p__Gemmatimonadota;c__Gemmatimonadetes;o__Gemmatimonadales;f__GWC2-71-9;g__Palsa-1233;s__Unclassified	Sichuan、Jiangsu	0	0	0	0	0	0	0	0	0	0.127669	0	0	0	0	0	0	0	0	0	0	0	0	0	0	0	0	0	0	0	0	0	0	0	0	0	0	0	0	0	0	0	0	0	0	0	0	0
MAG936	d__Bacteria;p__Acidobacteriota;c__Blastocatellia;o__Pyrinomonadales;f__Pyrinomonadaceae;g__PSRF01;s__Unclassified	Guizhou、Jiangsu	0	0	0	0	0	0	0	0	0	0	0	0	0	0	0	0	0	0	0	0	0	0	0	0	0	0.367087	0.10554	0.316679	0.261759	0.38254	0.201885	0.281138	3.54155	0	0.344476	0.411455	1.0064	0	0.269276	0	0	1.35788	0.279365	1.69823	1.76336	1.97097	0.0664261
MAG937	d__Bacteria;p__Actinomycetota;c__Thermoleophilia;o__Solirubrobacterales;f__Solirubrobacteraceae;g__Unclassified;s__Unclassified	Yunnan	0	0	0	0	0	0	0	0	0	0	0	0	0	0	0	0	0	0	0	0	0	0	0	0	0	0	0	0	0	0	0	0	0	0	0	0	0	0	0	0	0	0	0	0	0	0	0
MAG938	d__Bacteria;p__Chloroflexota;c__Chloroflexia;o__Thermomicrobiales;f__UBA6265;g__UBA6265;s__Unclassified	Sichuan	0	0	0.322783	0	0	0	0	0	0	0	0	0	0	0	0	0	0	0	0	0	0	0	0.0592751	0	0	0	0	0	0	0	0	0	0	0	0	0	0	0	0	0	0	0	0	0	0	0	0
MAG939	d__Bacteria;p__Patescibacteria;c__Saccharimonadia;o__Saccharimonadales;f__UBA4665;g__UBA4665;s__Unclassified	Yunnan	0	0	0	0	0	0	0	0	0	0	0	0	0	0	0	0	0	0	0	0	0	0	0	0	0	0	0	0	0	0	0	0	0	0	0	0	0	0	0	0	0	0	0	0	0	0	0
MAG94	d__Bacteria;p__Bacteroidota;c__UBA10030;o__UBA10030;f__UBA8401;g__SpSt-333;s__Unclassified	Jiangsu	0	0	0	0	0	0	0	0	0	0	0	0	0	0	0	0	0	0	0	0	0	0	0	0	0	0	0	0	0	0	0	0	0	0	0	0	0	0	0	0	0	0	0	0	0	0	0
MAG940	d__Bacteria;p__Actinomycetota;c__Actinomycetia;o__Unclassified;f__Unclassified;g__Unclassified;s__Unclassified	Sichuan、Guizhou、Yunnan、Jiangsu	0	0	0	0	0.109434	0	0	0	0	0.134679	0	0.183401	0	0	0	0	0	0	0	0.107393	0	0	0	0	0	0.710162	0.374449	0.790156	0.801151	0.990744	0.924903	0.310379	3.15276	0.530466	0.626713	1.21936	0.875124	0.446511	1.17603	1.1779	0.824517	0.869054	0.528731	1.65254	1.25954	0.41855	0.569587
MAG941	d__Bacteria;p__Actinomycetota;c__Actinomycetia;o__Actinomycetales;f__Actinomycetaceae;g__Unclassified;s__Unclassified	Sichuan	0	0	0.0189985	0	0	0	0	0	0	0	0	0	0.0111204	0.379556	0	0	0	0	0	0	0.023019	0	0	0	0	0	0	0	0	0	0	0	0	0	0	0	0	0	0	0	0	0	0	0	0	0	0
MAG942	d__Bacteria;p__Actinomycetota;c__Actinomycetia;o__Actinomycetales;f__Micrococcaceae;g__Kocuria;s__Unclassified	Sichuan	0.161179	0	0.481456	0.111971	0	0	0	0.615537	0	0	0	0	0	0	0.119845	0	0	0.0154322	0.0478968	0	0.0204376	0	0.321841	0	0.39544	0	0	0	0	0	0	0	0	0	0	0	0	0	0	0	0	0	0	0	0	0	0
MAG943	d__Bacteria;p__Actinomycetota;c__Actinomycetia;o__Propionibacteriales;f__Propionibacteriaceae;g__Microlunatus;s__Unclassified	Sichuan、Jiangsu	0.0102923	0	0	0.144989	0.218563	0	0	8.47457	2.27951	0.387716	2.1911	0	0	0	0.814634	0.0801945	0.336356	0	0.111351	0.326332	0	1.24342	0	0	0.102804	0	0	0	0	0	0	0	0	0	0	0	0	0	0	0	0	0	0	0	0	0	0
MAG944	d__Bacteria;p__Bacillota;c__Bacilli;o__Staphylococcales;f__Salinicoccaceae;g__Salinicoccus;s__Unclassified	Sichuan	0	0	0.0379195	0	0	0	0	0.23939	0	0	0	0	0.00838958	4.4203	0	0	0	0.0290725	0	0	0.21687	0	0	0.0273206	0	0	0	0	0	0	0	0	0	0	0	0	0	0	0	0	0	0	0	0	0	0	0
MAG945	d__Bacteria;p__Actinomycetota;c__Actinomycetia;o__JAHEKZ01;f__JAHEKZ01;g__Unclassified;s__Unclassified	Sichuan	0	0.159186	0	0.625992	1.22993	0	0.321829	0	3.77271	1.89301	0.556481	0.320198	0	0	0.147965	1.31935	0	0	0.131727	1.85021	0	0.645245	0	0	0.243359	0	0	0	0	0	0	0	0	0	0	0	0	0	0	0	0	0	0	0	0	0	0
MAG946	d__Bacteria;p__Actinomycetota;c__Actinomycetia;o__Propionibacteriales;f__Propionibacteriaceae;g__Raineyella;s__Unclassified	Sichuan	1.29104	0	0	1.53313	0	0.128773	0	0.131703	0.223006	0	0	0	0	0	0	0	0	0	9.9592	0	0	0	0.0365936	0	0	0	0	0	0	0	0	0	0	0	0	0	0	0	0	0	0	0	0	0	0	0	0
MAG947	d__Bacteria;p__Bacillota;c__Bacilli;o__Bacillales;f__Planococcaceae;g__Sporosarcina;s__Unclassified	Sichuan	0	0	0	0	0	0	0	0	0	0	0	0	0	1.12465	0	0	0	0	0	0	0	0	0	0	0	0	0	0	0	0	0	0	0	0	0	0	0	0	0	0	0	0	0	0	0	0	0
MAG948	d__Bacteria;p__Pseudomonadota;c__Gammaproteobacteria;o__Burkholderiales;f__Nitrosomonadaceae;g__Nitrosospira;s__Unclassified	Sichuan、Guizhou	0	0	0	0	0	0	0.391352	0	0	0	0	0	0	0	0	0	0	0	0	0	0	0	0	0	0.0802907	0.629281	0.693299	0	0	0	0	0.284381	0	0	0.542454	0	0	0	0	0	0	0	0	0	0	0	0
MAG949	d__Bacteria;p__Bacillota_A;c__Clostridia;o__Lachnospirales;f__Lachnospiraceae;g__Blautia_A;s__Blautia_A sp000285855	Yunnan	0	0	0	0	0	0	0	0	0	0	0	0	0	0	0	0	0	0	0	0	0	0	0	0	0	0	0	0	0	0	0	0	0	0	0	0	0	0	0	0	0	0	0	0	0	0	0
MAG95	d__Bacteria;p__Pseudomonadota;c__Gammaproteobacteria;o__Steroidobacterales;f__Steroidobacteraceae;g__13-2-20CM-66-19;s__Unclassified	Yunnan	0	0	0	0	0	0	0	0	0	0	0	0	0	0	0	0	0	0	0	0	0	0	0	0	0	0	0	0	0	0	0	0	0	0	0	0	0	0	0	0	0	0	0	0	0	0	0
MAG950	d__Bacteria;p__Actinomycetota;c__Actinomycetia;o__Actinomycetales;f__Dermatophilaceae;g__Marihabitans;s__Marihabitans endophyticus	Sichuan	3.44674	0	0.0536729	1.86252	0	0.236462	0	0.376627	0.257527	0	0	0	0	0	0.0519875	0	0	0	4.71496	0	0	0	0.613357	0	0	0	0	0	0	0	0	0	0	0	0	0	0	0	0	0	0	0	0	0	0	0	0
MAG951	d__Bacteria;p__Actinomycetota;c__Actinomycetia;o__Mycobacteriales;f__Jatrophihabitantaceae;g__Jatrophihabitans_A;s__Unclassified	Yunnan、Jiangsu	0	0	0	0	0	0	0	0	0	0	0	0	0	0	0	0	0	0	0	0	0	0	0	0	0	0	0	0	0	0	0	0	0	0	0	0	0	0	0	0	0	0	0	0	0	0	0
MAG952	d__Bacteria;p__Pseudomonadota;c__Alphaproteobacteria;o__Rhodobacterales;f__Rhodobacteraceae;g__Paracoccus;s__Paracoccus sp021491915	Sichuan、Guizhou、Yunnan、Jiangsu	0.101129	0	0	0.0680208	0.171854	0	0	0.782557	0.370839	0.150595	1.56162	0	0	0	1.16392	0.0902704	0.762199	0	0.16221	0	0	0.0493936	0.0944758	0	0.429391	0.258414	0.524011	0.275288	0	0.113104	0.361073	0.144103	0	0	0	0	0	0.548544	0	0.37928	0.625702	0.318481	0.192727	0	0	0	0.0847031
MAG953	d__Bacteria;p__Deinococcota;c__Deinococci;o__Deinococcales;f__Deinococcaceae;g__Deinococcus;s__Unclassified	Sichuan	0.0230163	0	0	0.136641	0.0775665	0	0	0	0	0	0	0	0	0	0	0	0	0	0.0882596	0	0	0.0677073	0.375382	0	0	0	0	0	0	0	0	0	0	0	0	0	0	0	0	0	0	0	0	0	0	0	0
MAG954	d__Bacteria;p__Nitrospirota;c__Nitrospiria;o__Nitrospirales;f__Nitrospiraceae;g__Nitrospira_F;s__Unclassified	Sichuan、Guizhou、Jiangsu	0	0	0	0	0	0	0	0	0	0.137814	0	1.66615	0	0	0	0	0	0	0	0.134792	0	0	0	0	0	0	0	0	0	0	0	0	0.233496	0	0	0	0.612476	0	0	0	0	0	0	0	0	0	0
MAG955	d__Bacteria;p__Actinomycetota;c__Actinomycetia;o__Actinomycetales;f__Micrococcaceae;g__Glutamicibacter;s__Glutamicibacter mishrai	Sichuan、Jiangsu	0.170888	0	0.0119756	0.110107	0	0	0	0	0	0	0	0	0	0	0	0	0	0	0.260674	0	0	0	0	0	0	0	0	0	0	0	0	0	0	0	0	0	0	0	0	0	0	0	0	0	0	0	0
MAG956	d__Bacteria;p__Bacteroidota;c__Bacteroidia;o__Chitinophagales;f__Chitinophagaceae;g__Flavisolibacter;s__Unclassified	Jiangsu	0	0	0	0	0	0	0	0	0	0	0	0	0	0	0	0	0	0	0	0	0	0	0	0	0	0	0	0	0	0	0	0	0	0	0	0	0	0	0	0	0	0	0	0	0	0	0
MAG957	d__Bacteria;p__Acidobacteriota;c__Blastocatellia;o__Pyrinomonadales;f__Pyrinomonadaceae;g__PSRF01;s__Unclassified	Jiangsu	0	0	0	0	0	0	0	0	0	0	0	0	0	0	0	0	0	0	0	0	0	0	0	0	0	0	0	0	0	0	0	0	0	0	0	0	0	0	0	0	0	0	0	0	0	0	0
MAG958	d__Bacteria;p__Pseudomonadota;c__Alphaproteobacteria;o__Rhodobacterales;f__Rhodobacteraceae;g__Rubellimicrobium;s__Unclassified	Sichuan	0	0	0	0	0	0	0	2.72196	2.91284	0.0903653	0.842781	0	0	0	0.760945	0	1.30305	0	0	0.144314	0	0.201655	0	0	0	0	0	0	0	0	0	0	0	0	0	0	0	0	0	0	0	0	0	0	0	0	0
MAG959	d__Bacteria;p__Pseudomonadota;c__Gammaproteobacteria;o__Burkholderiales;f__Usitatibacteraceae;g__Usitatibacter;s__Unclassified	Guizhou、Yunnan	0	0	0	0	0	0	0	0	0	0	0	0	0	0	0	0	0	0	0	0	0	0	0	0	0	0	0	0	0	0	0	0	0	0.29268	0	0.24363	0	0	0	0	0	0	0	0	0	0	0
MAG96	d__Bacteria;p__Bacteroidota;c__Bacteroidia;o__Chitinophagales;f__Chitinophagaceae;g__Arachidicoccus;s__Arachidicoccus soli	Jiangsu	0	0	0	0	0	0	0	0	0	0	0	0	0	0	0	0	0	0	0	0	0	0	0	0	0	0	0	0	0	0	0	0	0	0	0	0	0	0	0	0	0	0	0	0	0	0	0
MAG960	d__Bacteria;p__Chloroflexota;c__Limnocylindria;o__Limnocylindrales;f__CSP1-4;g__CAIXZV01;s__Unclassified	Jiangsu	0	0	0	0	0	0	0	0	0	0	0	0	0	0	0	0	0	0	0	0	0	0	0	0	0	0	0	0	0	0	0	0	0	0	0	0	0	0	0	0	0	0	0	0	0	0	0
MAG961	d__Bacteria;p__Pseudomonadota;c__Gammaproteobacteria;o__Burkholderiales;f__SG8-39;g__SCGC-AG-212-J23;s__Unclassified	Guizhou、Jiangsu	0	0	0	0	0	0	0	0	0	0	0	0	0	0	0	0	0	0	0	0	0	0	0	0	0	0	0	0	0	0.189996	0.15706	0	2.73474	0	0	0	2.28929	0	0	0	0	0	0	1.6592	2.24223	0	0.0487746
MAG962	d__Bacteria;p__Pseudomonadota;c__Alphaproteobacteria;o__Rhizobiales;f__Xanthobacteraceae;g__VAZQ01;s__Unclassified	Sichuan、Guizhou、Yunnan、Jiangsu	0	0.0582418	0	0.0678574	0	0.041692	0.499382	0	0.213495	0.144013	0	0	0	0	0	0	0	0	0	0.0705302	0	0	0	0	0.245984	0	0	0.147194	5.14774	0.175341	0.208367	0.374008	0.162049	13.5391	0	5.14352	0.233891	0	4.17538	0.295126	0.115498	0.212043	0.292972	0.316664	0.23686	0.463417	0.210177
MAG963	d__Bacteria;p__Actinomycetota;c__Actinomycetia;o__Actinomycetales;f__Dermatophilaceae;g__Janibacter;s__Unclassified	Sichuan	0	0	1.46071	0	0	0	0	0.0699025	0	0	0	0	0.00781583	0.0446611	0	0	0	0.0109972	0	0	0.195263	0	0.168543	0	0.115998	0	0	0	0	0	0	0	0	0	0	0	0	0	0	0	0	0	0	0	0	0	0
MAG964	d__Bacteria;p__Pseudomonadota;c__Gammaproteobacteria;o__Pseudomonadales;f__Pseudomonadaceae;g__Thiopseudomonas;s__Unclassified	Sichuan	0	0	0	0	0	0	0	0	0	0	0	0	0.215768	0	0	0	0	1.1898	0	0	1.44779	0	0	0	0	0	0	0	0	0	0	0	0	0	0	0	0	0	0	0	0	0	0	0	0	0	0
MAG965	d__Bacteria;p__Actinomycetota;c__Actinomycetia;o__Mycobacteriales;f__CADCTP01;g__CADCTP01;s__Unclassified	Yunnan、Jiangsu	0	0	0	0	0	0	0	0	0	0	0	0	0	0	0	0	0	0	0	0	0	0	0	0	0	0	0	0	0	0	0	0	0	0	0	0	0	0	0	0	0	0	0	0	0	0	0
MAG966	d__Bacteria;p__Pseudomonadota;c__Gammaproteobacteria;o__Pseudomonadales;f__Cellvibrionaceae;g__Cellvibrio;s__Unclassified	Sichuan	0	0	0.0171572	0	0	0	0	0	0	0	0	0	0	0.468077	0	0	0	0	0	0	0	0	0	0	0	0	0	0	0	0	0	0	0	0	0	0	0	0	0	0	0	0	0	0	0	0	0
MAG967	d__Bacteria;p__Actinomycetota;c__Actinomycetia;o__Streptomycetales;f__Streptomycetaceae;g__Streptomyces;s__Unclassified	Sichuan	0	0	0	0	0	2.41697	0	0	0	0	0	0	0	0	0	0	0	0	0	0	0	0	0	0	0	0	0	0	0	0	0	0	0	0	0	0	0	0	0	0	0	0	0	0	0	0	0
MAG968	d__Bacteria;p__Armatimonadota;c__Fimbriimonadia;o__Fimbriimonadales;f__ATM1;g__Unclassified;s__Unclassified	Jiangsu	0	0	0	0	0	0	0	0	0	0	0	0	0	0	0	0	0	0	0	0	0	0	0	0	0	0	0	0	0	0	0	0	0	0	0	0	0	0	0	0	0	0	0	0	0	0	0
MAG969	d__Bacteria;p__Bacteroidota;c__Bacteroidia;o__Chitinophagales;f__Chitinophagaceae;g__Flaviaesturariibacter;s__Unclassified	Yunnan	0	0	0	0	0	0	0	0	0	0	0	0	0	0	0	0	0	0	0	0	0	0	0	0	0	0	0	0	0	0	0	0	0	0	0	0	0	0	0	0	0	0	0	0	0	0	0
MAG97	d__Bacteria;p__Pseudomonadota;c__Alphaproteobacteria;o__Rhizobiales;f__Devosiaceae;g__Devosia;s__Devosia sp015234425	Sichuan	0.0495072	0	0.100965	0	0	0	0	0	0	0	0	0	0	0.175671	0	0	0	0	0.0411468	0	0	0	0.712525	0	0	0	0	0	0	0	0	0	0	0	0	0	0	0	0	0	0	0	0	0	0	0	0
MAG970	d__Bacteria;p__Actinomycetota;c__Thermoleophilia;o__Solirubrobacterales;f__Solirubrobacteraceae;g__Unclassified;s__Unclassified	Yunnan	0	0	0	0	0	0	0	0	0	0	0	0	0	0	0	0	0	0	0	0	0	0	0	0	0	0	0	0	0	0	0	0	0	0	0	0	0	0	0	0	0	0	0	0	0	0	0
MAG971	d__Bacteria;p__Pseudomonadota;c__Alphaproteobacteria;o__Rhodobacterales;f__Rhodobacteraceae;g__Paracoccus;s__Paracoccus sp021491915	Sichuan、Guizhou、Yunnan、Jiangsu	0.185381	0	0	0.112671	0.188606	0	0	0.928883	0.445437	0.202168	1.46935	0	0	0	1.24934	0.084895	0.77001	0	0.497212	0.0920213	0	0.0818367	0.184835	0	0.44019	0.201975	0.416586	0.216461	0	0.0851004	0.329475	0.164706	0	0	0	0	0	0.483418	0	0.331815	0.550647	0.373994	0.217783	0	0	0	0.0782538
MAG972	d__Bacteria;p__Actinomycetota;c__Actinomycetia;o__Mycobacteriales;f__Micromonosporaceae;g__Unclassified;s__Unclassified	Sichuan、Guizhou、Jiangsu	0	0	0	0	0	0	0	0	0	0	0	0.146851	0	0	0	0	0	0	0	0	0	0	0	0	0	0	0.201015	0.482679	0	0.876093	0.254564	0.25253	0.151165	0	0	0	0.12271	0.553343	0	0.161751	0.255835	0.158384	0.130819	0.836918	0.416451	0	1.15489
MAG973	d__Bacteria;p__Gemmatimonadota;c__Gemmatimonadetes;o__Gemmatimonadales;f__Gemmatimonadaceae;g__Fen-1247;s__Unclassified	Jiangsu	0	0	0	0	0	0	0	0	0	0	0	0	0	0	0	0	0	0	0	0	0	0	0	0	0	0	0	0	0	0	0	0	0	0	0	0	0	0	0	0	0	0	0	0	0	0	0
MAG974	d__Bacteria;p__Pseudomonadota;c__Gammaproteobacteria;o__Steroidobacterales;f__Steroidobacteraceae;g__CADEED01;s__Unclassified	Yunnan	0	0	0	0	0	0	0	0	0	0	0	0	0	0	0	0	0	0	0	0	0	0	0	0	0	0	0	0	0	0	0	0	0	0	0	0	0	0	0	0	0	0	0	0	0	0	0
MAG975	d__Bacteria;p__Actinomycetota;c__Actinomycetia;o__Mycobacteriales;f__Pseudonocardiaceae;g__Actinocrispum;s__Unclassified	Yunnan	0	0	0	0	0	0	0	0	0	0	0	0	0	0	0	0	0	0	0	0	0	0	0	0	0	0	0	0	0	0	0	0	0	0	0	0	0	0	0	0	0	0	0	0	0	0	0
MAG976	d__Bacteria;p__Actinomycetota;c__Actinomycetia;o__Actinomycetales;f__Microbacteriaceae;g__Microbacterium;s__Microbacterium commune	Sichuan、Jiangsu	0.817964	0	0	0.801055	0.0590897	0.242137	0	0.116898	0.11636	0	0	0	0	0.0464348	0.114078	0	0.0690773	0	0.832603	0	0	0.0518458	0.13383	0	0.0815907	0	0	0	0	0	0	0	0	0	0	0	0	0	0	0	0	0	0	0	0	0	0
MAG977	d__Bacteria;p__Actinomycetota;c__Thermoleophilia;o__Solirubrobacterales;f__70-9;g__VAYN01;s__Unclassified	Sichuan、Guizhou、Jiangsu	0	0	0	0	0	0	0	0	0.109137	0	0	0	0	0	0	0	0	0	0	0	0	0.144911	0	0	0.178696	0	0	0	0	0	4.79073	0	0	0	0	0	0	0	0	3.14959	0	0.275438	0	0	0	0	0
MAG978	d__Archaea;p__Thermoproteota;c__Nitrososphaeria;o__Nitrososphaerales;f__Nitrososphaeraceae;g__TA-21;s__Unclassified	Guizhou、Yunnan、Jiangsu	0	0	0	0	0	0	0	0	0	0	0	0	0	0	0	0	0	0	0	0	0	0	0	0	0	0.256417	0	0.252571	0	0.29796	0.140189	0	0	0	1.35322	0	0	0.811478	0	0.592477	0.161039	0	0	0	0	0	1.4772
MAG979	d__Bacteria;p__Pseudomonadota;c__Gammaproteobacteria;o__Diplorickettsiales;f__Diplorickettsiaceae;g__Aquirickettsiella;s__Unclassified	Sichuan	0	0	0	1.16228	0.0855082	1.54758	1.85481	0	0.508322	0.291307	0	0	0	0	0.0520025	0.171351	0	0	0	0.09219	0	0	0	0	1.65328	0	0	0	0	0	0	0	0	0	0	0	0	0	0	0	0	0	0	0	0	0	0
MAG98	d__Bacteria;p__Pseudomonadota;c__Gammaproteobacteria;o__Burkholderiales;f__Burkholderiaceae;g__Telluria;s__Unclassified	Yunnan、Jiangsu	0	0	0	0	0	0	0	0	0	0	0	0	0	0	0	0	0	0	0	0	0	0	0	0	0	0	0	0	0	0	0	0	0	0	0	0	0	0	0	0	0	0	0	0	0	0	0
MAG980	d__Bacteria;p__Gemmatimonadota;c__Gemmatimonadetes;o__Gemmatimonadales;f__Gemmatimonadaceae;g__JABFXC01;s__Unclassified	Guizhou、Yunnan	0	0	0	0	0	0	0	0	0	0	0	0	0	0	0	0	0	0	0	0	0	0	0	0	0	0	0	0	0.364776	0	0	0	0	1.62833	0	0.318963	0	0	0	0	0	0	0	0	0	0	0
MAG981	d__Bacteria;p__Bacteroidota;c__Bacteroidia;o__Chitinophagales;f__Chitinophagaceae;g__Hanamia;s__Unclassified	Sichuan、Jiangsu	0	0	0	3.19077	0	0	0	0	0	0	0	0	0	0	0	0	0	0	0.0802049	0	0	0	0	0	0	0	0	0	0	0	0	0	0	0	0	0	0	0	0	0	0	0	0	0	0	0	0
MAG982	d__Bacteria;p__Actinomycetota;c__Actinomycetia;o__Actinomycetales;f__Microbacteriaceae;g__Microbacterium;s__Microbacterium sp003293595	Jiangsu	0	0	0	0	0	0	0	0	0	0	0	0	0	0	0	0	0	0	0	0	0	0	0	0	0	0	0	0	0	0	0	0	0	0	0	0	0	0	0	0	0	0	0	0	0	0	0
MAG983	d__Bacteria;p__Bacteroidota;c__Bacteroidia;o__Chitinophagales;f__Chitinophagaceae;g__Ferruginibacter;s__Unclassified	Guizhou	0	0	0	0	0	0	0	0	0	0	0	0	0	0	0	0	0	0	0	0	0	0	0	0	0	0.15542	0.116751	4.62286	0	1.83726	0.120837	0	0	0	0	0	0.117805	0	0	0.115311	0.142614	0	0	0.19627	0.0887759	0	1.12299
MAG984	d__Bacteria;p__Pseudomonadota;c__Alphaproteobacteria;o__Rhodobacterales;f__Rhodobacteraceae;g__Amaricoccus;s__Unclassified	Jiangsu	0	0	0	0	0	0	0	0	0	0	0	0	0	0	0	0	0	0	0	0	0	0	0	0	0	0	0	0	0	0	0	0	0	0	0	0	0	0	0	0	0	0	0	0	0	0	0
MAG985	d__Bacteria;p__Actinomycetota;c__Actinomycetia;o__Actinomycetales;f__Dermabacteraceae;g__Brachybacterium;s__Brachybacterium massiliense	Sichuan、Jiangsu	0.0883439	0	4.67807	0	0	0	0	0.116795	0	0.130482	0	0	0.0418205	2.19149	0.203337	0	0	0.13975	0	0	0.463322	0	0.115379	0.954324	0.445498	0	0	0	0	0	0	0	0	0	0	0	0	0	0	0	0	0	0	0	0	0	0
MAG986	d__Bacteria;p__Gemmatimonadota;c__Gemmatimonadetes;o__Gemmatimonadales;f__Gemmatimonadaceae;g__JABFXC01;s__Unclassified	Guizhou、Yunnan	0	0	0	0	0	0	0	0	0	0	0	0	0	0	0	0	0	0	0	0	0	0	0	0	0	0	0	0	0.278445	0	0	0	0	1.09817	0	0.240827	0	0	0	0	0	0	0	0	0	0	0
MAG987	d__Archaea;p__Thermoproteota;c__Nitrososphaeria;o__Nitrososphaerales;f__Nitrososphaeraceae;g__TH1177;s__Unclassified	Guizhou、Yunnan、Jiangsu	0	0	0	0	0	0	0	0	0	0	0	0	0	0	0	0	0	0	0	0	0	0	0	0	0	0	0	1.26518	0	0.852536	0.146225	0	0.736731	0	0	0.234508	0.931701	0	0.235433	0	0	0	0	0.645838	1.15906	0	1.72956
MAG988	d__Bacteria;p__Actinomycetota;c__Acidimicrobiia;o__Acidimicrobiales;f__Ilumatobacteraceae;g__Ilumatobacter;s__Unclassified	Guizhou、Jiangsu	0	0	0	0	0	0	0	0	0	0	0	0	0	0	0	0	0	0	0	0	0	0	0	0	0	0	0	0	0	0	0	0	0	0	0	0	0	0.755695	0	0	0.10906	0	0	0	0	0	0.0583967
MAG989	d__Bacteria;p__Pseudomonadota;c__Gammaproteobacteria;o__Burkholderiales;f__Burkholderiaceae;g__Pseudoduganella;s__Unclassified	Guizhou	0	0	0	0	0	0	0	0	0	0	0	0	0	0	0	0	0	0	0	0	0	0	0	0	0	0	0	0	0	0	0	7.02245	0	0	0	0	0	0	0	0	0	0	0.108222	0	0	0	0
MAG99	d__Bacteria;p__Pseudomonadota;c__Gammaproteobacteria;o__Burkholderiales;f__Burkholderiaceae_B;g__Giesbergeria;s__Unclassified	Sichuan、Yunnan	0	0	0	0	0	0	0	0	0	0	0	0	0	0	0	0	0	0	0	0	0	0	2.32417	0	0	0	0	0	0	0	0	0	0	0	0	0	0	0	0	0	0	0	0	0	0	0	0
MAG990	d__Bacteria;p__Nitrospirota;c__Nitrospiria;o__Nitrospirales;f__Nitrospiraceae;g__Nitrospira_F;s__Unclassified	Sichuan、Guizhou、Jiangsu	0	2.97517	0	0.284789	0.76626	0.0434256	0.735758	0	0.528826	1.17875	0	0.0595832	0	0	0.280155	0.813266	0	0	0	1.14995	0	0.145143	0	0	0.749526	0.391517	0.28628	0	0	0	0.680852	0	0	0	0.249073	0	0.204836	0.286645	0	0	0.746433	0.100634	0.0748511	0	0	0	0
MAG991	d__Bacteria;p__Bacteroidota;c__Bacteroidia;o__Chitinophagales;f__Chitinophagaceae;g__Hanamia;s__Unclassified	Jiangsu	0	0	0	0	0	0	0	0	0	0	0	0	0	0	0	0	0	0	0	0	0	0	0	0	0	0	0	0	0	0	0	0	0	0	0	0	0	0	0	0	0	0	0	0	0	0	0
MAG992	d__Bacteria;p__Patescibacteria;c__Saccharimonadia;o__Saccharimonadales;f__UBA4665;g__Unclassified;s__Unclassified	Jiangsu	0	0	0	0	0	0	0	0	0	0	0	0	0	0	0	0	0	0	0	0	0	0	0	0	0	0	0	0	0	0	0	0	0	0	0	0	0	0	0	0	0	0	0	0	0	0	0
MAG993	d__Archaea;p__Thermoproteota;c__Nitrososphaeria;o__Nitrososphaerales;f__Nitrososphaeraceae;g__TH5893;s__Unclassified	Jiangsu	0	0	0	0	0	0	0	0	0	0	0	0	0	0	0	0	0	0	0	0	0	0	0	0	0	0	0	0	0	0	0	0	0	0	0	0	0	0	0	0	0	0	0	0	0	0	0
MAG994	d__Bacteria;p__Pseudomonadota;c__Gammaproteobacteria;o__Xanthomonadales;f__Rhodanobacteraceae;g__Rhodanobacter;s__Unclassified	Jiangsu	0	0	0	0	0	0	0	0	0	0	0	0	0	0	0	0	0	0	0	0	0	0	0	0	0	0	0	0	0	0	0	0	0	0	0	0	0	0	0	0	0	0	0	0	0	0	0
MAG995	d__Bacteria;p__Chloroflexota;c__UBA6077;o__UBA6077;f__JADZDV01;g__Unclassified;s__Unclassified	Guizhou、Jiangsu	0	0	0	0	0	0	0	0	0	0	0	0	0	0	0	0	0	0	0	0	0	0	0	0	0	0	0	0	0	0	0	0	0	0	0	0	0	0.285277	0	0	0	0	0	0	0	0	0.570949
MAG996	d__Bacteria;p__Acidobacteriota;c__Vicinamibacteria;o__Vicinamibacterales;f__2-12-FULL-66-21;g__JACCXG01;s__Unclassified	Guizhou、Jiangsu	0	0	0	0	0	0	0	0	0	0	0	0	0	0	0	0	0	0	0	0	0	0	0	0	0	0	0	0	0	0.0942962	0	0	0	0	0	0	0	0	0	0	0	0	0	0	0	0	1.09458
MAG997	d__Bacteria;p__Dormibacterota;c__Dormibacteria;o__Dormibacterales;f__Dormibacteraceae;g__Unclassified;s__Unclassified	Yunnan	0	0	0	0	0	0	0	0	0	0	0	0	0	0	0	0	0	0	0	0	0	0	0	0	0	0	0	0	0	0	0	0	0	0	0	0	0	0	0	0	0	0	0	0	0	0	0
MAG998	d__Bacteria;p__Actinomycetota;c__Actinomycetia;o__Propionibacteriales;f__Propionibacteriaceae;g__Arachnia;s__Unclassified	Sichuan	0	0	0.142538	0	0	0	0	0.0797368	0	0	0	0	0.00868096	0.81337	0.058161	0	0	0.006352	0	0	0.0234037	0	0.147944	0.00884386	0.0834379	0	0	0	0	0	0	0	0	0	0	0	0	0	0	0	0	0	0	0	0	0	0
MAG999	d__Bacteria;p__Pseudomonadota;c__Gammaproteobacteria;o__Xanthomonadales;f__Rhodanobacteraceae;g__Rudaea;s__Unclassified	Jiangsu	0	0	0	0	0	0	0	0	0	0	0	0	0	0	0	0	0	0	0	0	0	0	0	0	0	0	0	0	0	0	0	0	0	0	0	0	0	0	0	0	0	0	0	0	0	0	0
[truncated: 64 more columns]
