# Supplementary material for: Insights into antibiotic resistomes from metagenome-assembled genomes and gene catalogs of soil microbiota across environments
Source: PeerJ. 2025 Nov 19;13:e20348. doi: 10.7717/peerj.20348 (PMC12640132; doi:10.7717/peerj.20348)
Supplement: Supplemental Information 12 [file peerj-13-20348-s012.xlsx]

## Sheet: Relative Abundances of MAGs
Table S7: Relative Abundances of MAGs in Guizhou Province.
MAG	Taxonomy	GZE16	GZE19	GZE2	GZE3	GZE6	GZE25	GZE7	GZE10	GZE27	GZE17	GZE15	GZE12	GZE18	GZE26	GZE13	GZE24	GZE20	GZE11	GZE4	GZE8	GZE28	GZE21	GZE9	GZE14	GZE22	GZE5	GZE1	GZE23
MAG1	d__Bacteria;p__Acidobacteriota;c__Thermoanaerobaculia;o__Gp7-AA8;f__Gp7-AA8;g__QHVT01;s__Unclassified	0	0	0	0	0	0	0	0	0	0	0	0	0	0	10.6022	0	0	0	0	0	0	0	0	0	0	0	0	0
MAG100	d__Bacteria;p__Bacteroidota;c__Bacteroidia;o__AKYH767;f__2-12-FULL-35-15;g__2-12-FULL-35-15;s__Unclassified	0	0	0	0	0	0	0	0	0	0	0	0	0	0	0	0	0.223736	0	0	0	0	0	0	0	0	0	0	0
MAG1005	d__Bacteria;p__Actinomycetota;c__Thermoleophilia;o__Gaiellales;f__Gaiellaceae;g__JACCRW01;s__Unclassified	0	0	0	0	0	0	0	0	0.25272	0	0	0	0	0	0	0	0	0	0	0	0	0	0	0	0	0	0	0
MAG1009	d__Archaea;p__Thermoproteota;c__Nitrososphaeria;o__Nitrososphaerales;f__Nitrososphaeraceae;g__TH1177;s__Unclassified	0.878584	0.455743	4.52819	0	4.17343	2.17073	0.258932	2.50333	0	1.37432	0.39945	2.15086	2.26571	0.410829	1.58276	1.00185	0.251777	0.29949	1.61975	3.34308	0.191641	4.18972	1.45218	1.38206	2.26092	0.505259	5.05159	2.74867
MAG1014	d__Bacteria;p__Pseudomonadota;c__Gammaproteobacteria;o__Xanthomonadales;f__Xanthomonadaceae;g__Lysobacter;s__Unclassified	0.34723	0.1983	0.258117	0	0.0829488	0	0	0	0	0.36615	0	0	0	0	0	0	1.10419	0	0	0	0.142993	0	0.145339	0	0.220274	0	0	0
MAG1017	d__Bacteria;p__Pseudomonadota;c__Gammaproteobacteria;o__Pseudomonadales;f__Moraxellaceae;g__Acinetobacter;s__Acinetobacter pseudolwoffii	0	0	0	0	0	0	0	0	0	0	0	0	0	0	0	0	0	0.0932809	0	0	0	0	0	0	0	0	0	0
MAG1018	d__Bacteria;p__Pseudomonadota;c__Gammaproteobacteria;o__Pseudomonadales;f__Moraxellaceae;g__Acinetobacter;s__Acinetobacter bohemicus	0	0	0	0	0	0	0.280671	0	0	0	0	0	0	0	0	2.02051	0.204573	4.5509	0	0	0	0	0	0	0	0	0	0
MAG102	d__Bacteria;p__Tectomicrobia;c__Entotheonellia;o__Entotheonellales;f__Entotheonellaceae;g__SXND01;s__Unclassified	0.22574	0	0.141454	0.415449	0.533465	0.247732	0.228401	1.76359	0	0.689888	0.208615	0.708252	0	0.271053	0.221116	0	0.598855	0.28008	2.2536	2.74219	0.89815	0	0.583681	0.498677	0.367538	0.355959	0.0680445	0
MAG1021	d__Archaea;p__Thermoproteota;c__Nitrososphaeria;o__Nitrososphaerales;f__Nitrososphaeraceae;g__TH1177;s__Unclassified	0	0	1.41518	0	0.875891	0.16352	0	0.941807	0	0	0.297936	1.03601	0	0.306364	0	0	0	0	0.794056	1.41316	0	1.71135	0	0.605575	0.127312	0.31915	1.55175	1.25691
MAG1030	d__Bacteria;p__Chloroflexota;c__Chloroflexia;o__Chloroflexales;f__Herpetosiphonaceae;g__Herpetosiphon;s__Herpetosiphon geysericola	0	0	0	0	0	0	0	0	0	0	0	0	0	0	0	0	0.157583	0	0	0	0	0	0	0	0	0	0	0
MAG1039	d__Bacteria;p__Actinomycetota;c__Thermoleophilia;o__Solirubrobacterales;f__Solirubrobacteraceae;g__Unclassified;s__Unclassified	0	0	0	0	0.183151	0	0	0	0	0	0	0	0	0	0	0	0	0	0	0	0	0.132184	0	0	0	0	0.0826836	0.0915852
MAG104	d__Bacteria;p__Pseudomonadota;c__Gammaproteobacteria;o__Burkholderiales;f__Casimicrobiaceae;g__VBCG01;s__Unclassified	2.00658	0.499779	0.148175	1.2941	0.319209	1.62271	0.975724	1.89018	0.397533	1.63095	1.15272	0.93556	0.17344	1.26558	0.229611	1.87218	2.21409	1.09828	0.509495	1.07156	2.21833	0	8.64362	0.535889	0.950603	1.33476	0.0270344	0
MAG1044	d__Bacteria;p__Pseudomonadota;c__Gammaproteobacteria;o__Burkholderiales;f__Burkholderiaceae_B;g__JAEUPI01;s__Unclassified	0	0	0	0	0	0.144549	0	0	0	0	0	0	0	0	0	0	0	0	0	0	0	0	0.136384	0	0	0	0	0
MAG105	d__Bacteria;p__Cyanobacteriota;c__Cyanobacteriia;o__Cyanobacteriales;f__Microcoleaceae;g__Microcoleus;s__Microcoleus sp014695295	0	0	2.12041	0	0.255391	0.718395	0.333221	0.346978	0	0	0.333703	0.221193	1.34168	0.470835	0.131559	0	0.365773	0.304704	0.176341	0	2.12849	5.22834	0	0.38178	0	0	4.37607	1.2799
MAG1053	d__Archaea;p__Thermoproteota;c__Nitrososphaeria;o__Nitrososphaerales;f__Nitrososphaeraceae;g__Nitrosocosmicus;s__Nitrosocosmicus oleophilus	0.309358	0.168823	0.391719	0.712442	0.479331	0.730999	0.178372	0.11695	0.455368	0.636814	0.591128	0.321079	0.192841	0.638269	0.987857	0.803715	0.458761	0.262213	0.352094	0.403391	0.459019	0.119461	0.601933	0.166723	1.09962	0.699017	0.0830288	0
MAG1057	d__Bacteria;p__Actinomycetota;c__Actinomycetia;o__Jiangellales;f__Unclassified;g__Unclassified;s__Unclassified	0	0	0.707866	0	2.2858	0.658478	0	0	0	0	0	0	0.953105	0	0.0904075	0.136312	0	0	0	0	0	0.305672	0	0	0.546777	0	0.297297	0.23723
MAG1061	d__Bacteria;p__Actinomycetota;c__Actinomycetia;o__Propionibacteriales;f__Propionibacteriaceae;g__Microlunatus;s__Unclassified	0	0	0	0	0	0	0	0	0	0	0	0	0	0.399405	0	0	0	0	0	0	0	0	0	0	0	0.2495	0	0
MAG1066	d__Bacteria;p__Pseudomonadota;c__Alphaproteobacteria;o__Reyranellales;f__Unclassified;g__Unclassified;s__Unclassified	0	0.3643	0	0	0	0	0	0	0	0	0	0	0	0	0	0	0	0	0	0	0	0	0	0	0	0	0	0
MAG1067	d__Bacteria;p__Pseudomonadota;c__Gammaproteobacteria;o__Xanthomonadales;f__Xanthomonadaceae;g__Pseudoxanthomonas_A;s__Unclassified	0.619419	1.39121	0.378156	0	0	0.172715	0.656711	0	0	0	0	0.274292	1.78961	0	0.215657	0.561712	0.485357	3.84356	0.119674	0	0.167506	0	0.106485	0.141489	0.434866	0	0.05526	0
MAG1068	d__Archaea;p__Thermoproteota;c__Nitrososphaeria;o__Nitrososphaerales;f__Nitrososphaeraceae;g__TA-21;s__Unclassified	0.743974	0.141204	1.16666	0.698173	2.91611	1.04751	0.265691	9.93486	0.209488	1.26112	1.10408	3.36413	0	0.979267	0.369316	0	0.182699	0.219201	7.41476	10.0931	0.42246	0.680238	1.3237	2.1105	0.61668	1.13358	1.00909	0.399853
MAG1069	d__Bacteria;p__Pseudomonadota;c__Gammaproteobacteria;o__Xanthomonadales;f__Xanthomonadaceae;g__Lysobacter_B;s__Lysobacter_B sp011300685	0	0	0	0	0	0	0	0	0	0	0	0	0	0	0	0	0.547497	0	0	0	0	0	0	0	0	0	0	0
MAG1070	d__Bacteria;p__Actinomycetota;c__Thermoleophilia;o__Solirubrobacterales;f__70-9;g__VAYN01;s__Unclassified	1.40116	3.65627	0	0	0	0.140073	0	0	0	0.26457	0	0	0	0	0.221972	0	0	0	0	0	0	0.101786	0.703296	0	0	0	0.0865568	0
MAG1071	d__Bacteria;p__Actinomycetota;c__UBA4738;o__UBA4738;f__HRBIN12;g__Unclassified;s__Unclassified	0.566111	0.295178	0	0	0	0.271885	0	0.522727	0	0.61278	0	0.258629	0.391382	0	0.17296	0.109592	0	0	0.157536	0.303858	0	0	0.557987	0.174453	0.934902	0	0	0
MAG1075	d__Bacteria;p__Chloroflexota;c__Limnocylindria;o__Limnocylindrales;f__CSP1-4;g__SPCO01;s__Unclassified	0	0	0	0	0	0.115485	0	0	0	0	0	0	0.195544	0	0	0	0	0	0	0	0	0	0	0	0.189809	0	0.0480473	0
MAG1077	d__Bacteria;p__Bacteroidota;c__Bacteroidia;o__Chitinophagales;f__Chitinophagaceae;g__Flavisolibacter;s__Unclassified	0	0	0	0.701671	0	0	0	0	1.18101	0	0.658073	0	0	0.45768	0	0	0	0	0	0	0	0	0	0	0	0.476895	0	0
MAG1078	d__Bacteria;p__Actinomycetota;c__Actinomycetia;o__Actinomycetales;f__Microbacteriaceae;g__Yonghaparkia;s__Unclassified	0	0	0	0	0	0	0	0	0	0	0	0	0	0	0	0	0	0	0	0	0	0.0727436	0	0	0	0	0.0351101	0
MAG1081	d__Bacteria;p__Desulfobacterota_B;c__Binatia;o__UBA9968;f__UBA9968;g__DP-20;s__Unclassified	0	0	0	2.31392	0.152677	0	0.0750868	0	12.111	0	2.03961	0.186852	0	1.38529	0.224169	0	0	0	0	0	0.118986	0	0.127991	0.0586207	0	1.61647	0	0
MAG1084	d__Bacteria;p__Cyanobacteriota;c__Cyanobacteriia;o__Cyanobacteriales;f__Coleofasciculaceae;g__Unclassified;s__Unclassified	0	0	0	0	0	0	0	0	0	0	0	0	0	0	0	0	0	0	0	0	0	0.207103	0	0	0	0	0.100552	0
MAG1089	d__Bacteria;p__Actinomycetota;c__Thermoleophilia;o__Gaiellales;f__Gaiellaceae;g__JACCRW01;s__Unclassified	0	0	0	0	0	0	0	0	0.226585	0	0	0	0	0	0	0	0	0	0	0	0	0	0	0	0	0	0	0
MAG109	d__Bacteria;p__Gemmatimonadota;c__Gemmatimonadetes;o__Gemmatimonadales;f__Gemmatimonadaceae;g__JABFXC01;s__Unclassified	0	0	0	0	0	0	0	0	0.613757	0	0.301393	0	0	0	0	0	0	0	0	0	0	0	0	0	0	0	0	0
MAG1095	d__Bacteria;p__Cyanobacteriota;c__Cyanobacteriia;o__Cyanobacteriales;f__Microcoleaceae;g__Microcoleus;s__Unclassified	0	0	1.02846	0	0.111082	0.551997	0.337925	0.343737	0	0	0.311931	0.142308	1.30416	0.43069	0	0	0.273137	0.348183	0.123004	0	1.69868	1.89808	0	0.262883	0	0	2.30082	0.250742
MAG110	d__Bacteria;p__Acidobacteriota;c__Vicinamibacteria;o__Vicinamibacterales;f__SCN-69-37;g__Unclassified;s__Unclassified	0	0	0.188653	0	0.228254	0	0	1.88344	0	0	0	0.811001	0	0	0	0	0	0	9.66095	3.58233	0	0	0	0.660984	0	0	0.0394498	0
MAG1101	d__Bacteria;p__Actinomycetota;c__Thermoleophilia;o__Gaiellales;f__Gaiellaceae;g__JACCRW01;s__Unclassified	0	0	0	0	0	0	0	0	0.242057	0	0	0	0	0	0	0	0	0	0	0	0	0	0	0	0	0	0	0
MAG1102	d__Bacteria;p__Actinomycetota;c__Actinomycetia;o__Actinomycetales;f__Dermatophilaceae;g__F2B08;s__Unclassified	0	0	0	0	0	0.25331	0	0	0	0	0	0	0	0	0.161371	0.292434	0	0	0	0	0	0	0	0	0	0	0	0
MAG1103	d__Bacteria;p__Actinomycetota;c__Rubrobacteria;o__Rubrobacterales;f__Rubrobacteraceae;g__Rubrobacter_D;s__Unclassified	0	0	0.201921	0	0	0	0	0	0	0	0	0	1.3757	0	0	0	0	0	0	0	0	0.147498	0	0	0	0	0.189614	0.314037
MAG1107	d__Bacteria;p__Patescibacteria;c__Saccharimonadia;o__Saccharimonadales;f__UBA10212;g__JAIFWC01;s__Unclassified	0	0	0	0.436456	0	0	0	0	0.618594	0	0.292098	0	0	0	0	0	0	0	0	0	0	0	0	0	0	0.288795	0	0
MAG1108	d__Archaea;p__Thermoproteota;c__Nitrososphaeria;o__Nitrososphaerales;f__Nitrososphaeraceae;g__Nitrosocosmicus;s__Nitrosocosmicus oleophilus	0.345647	0.216517	0.415552	0.731357	0.516269	0.821299	0.192656	0.13567	0.468406	0.723625	0.607787	0.359596	0.213223	0.689487	1.08078	0.90029	0.510189	0.289145	0.385947	0.443353	0.502525	0.130207	0.674521	0.179074	1.20856	0.711041	0.0927939	0.0461079
MAG1112	d__Bacteria;p__Chloroflexota;c__Limnocylindria;o__Limnocylindrales;f__CSP1-4;g__SPCO01;s__Unclassified	0	0.115658	0	0	0	0.147749	0	0	0	0	0	0	0.2461	0	0.103598	0	0.0857908	0	0	0	0	0.0521922	0	0	0.246357	0	0.0641122	0
MAG1113	d__Bacteria;p__Chloroflexota;c__Anaerolineae;o__Anaerolineales;f__EnvOPS12;g__UBA12294;s__Unclassified	0	0	0	0	0	0	0	0	0	0	0	0	1.69063	0	0	0	0	0	0	0	0	0.0997156	0	0	0	0	0	0.34416
MAG1119	d__Bacteria;p__Chloroflexota;c__Anaerolineae;o__Anaerolineales;f__EnvOPS12;g__UBA12294;s__Unclassified	0.179136	0	0	0	0	0	1.77375	0	0	0.844366	0	0.585373	0	0	0.795513	0.408684	0.309222	0.927927	0.44427	0	5.07417	0	0.7866	0.437818	0	0	0	0
MAG1123	d__Bacteria;p__Actinomycetota;c__Thermoleophilia;o__Gaiellales;f__Gaiellaceae;g__VAXT01;s__Unclassified	0	0	1.12314	0	5.50943	0	0	0.200297	0	0	0	0	0.256982	0	0	0	0	0.0785172	0.439801	0.543149	0	3.90776	0	0	0	0	4.09349	3.00411
MAG1125	d__Bacteria;p__Actinomycetota;c__Thermoleophilia;o__Solirubrobacterales;f__70-9;g__Unclassified;s__Unclassified	0	0	0	0	0	0	0	0	0	0	0	0	0	0	0	0.204336	0	0	0	0	0	0	0	0	0	0	0	0
MAG1126	d__Bacteria;p__Chloroflexota;c__Limnocylindria;o__Limnocylindrales;f__CSP1-4;g__SPCO01;s__Unclassified	0	0	0	0	0	0.119172	0	0	0	0	0	0	0.191426	0	0.0888125	0	0	0	0	0	0	0	0	0	0.197903	0	0.0546523	0
MAG1129	d__Bacteria;p__Pseudomonadota;c__Alphaproteobacteria;o__Rhodobacterales;f__Rhodobacteraceae;g__Paracoccus;s__Paracoccus sp021491915	0.249238	0.487845	0.252951	0	0.104671	0.383639	0.185489	0	0	0	0	0	0.53662	0	0.403314	0.668756	0.443944	0.252412	0	0	0	0.090275	0	0	0.232647	0	0.249607	0.106693
MAG1132	d__Bacteria;p__Actinomycetota;c__Thermoleophilia;o__Solirubrobacterales;f__70-9;g__RHKX01;s__Unclassified	0	0	0	0	0	0	0	0.112754	0	0	0	0	0	0	0	0	0.086889	0	0	0	0	0	0	0	0	0	0	0
MAG115	d__Bacteria;p__Bacteroidota;c__Kapabacteria;o__OLB7;f__OLB7;g__JAFDZV01;s__Unclassified	0.392011	0.139306	0	0	0	0	0	0	0	0	0	0	0	0	0	5.72436	0	0	0	0	0	0	0	0	0	0	0	0
MAG118	d__Bacteria;p__Pseudomonadota;c__Gammaproteobacteria;o__Xanthomonadales;f__Xanthomonadaceae;g__Luteimonas_D;s__Unclassified	0	0.137207	0	0	0	0	0	0	0	0	0	0	0	0	0	0	0	0	0	0	0	0	0	0	0	0	0	0
MAG120	d__Bacteria;p__Pseudomonadota;c__Alphaproteobacteria;o__Rhizobiales;f__Hyphomicrobiaceae;g__AWTP1-13;s__Unclassified	1.13612	0.381559	0.535693	0.423072	0.75433	1.09224	0.541765	1.10851	0	1.37656	0.440043	0.9383	0.313439	0.392162	0.24203	0.724106	1.03681	0.824089	1.27415	1.28882	0.948354	0.824441	2.84	0.502641	0.708904	0.401117	1.31698	0.766398
MAG122	d__Bacteria;p__Pseudomonadota;c__Gammaproteobacteria;o__Xanthomonadales;f__Xanthomonadaceae;g__Lysobacter_B;s__Lysobacter_B sp011300685	0	0	0	0	0	0	0	0	0	0	0	0	0	0	0	0	0.326249	0	0	0	0	0	0	0	0	0	0	0
MAG124	d__Bacteria;p__Pseudomonadota;c__Gammaproteobacteria;o__Steroidobacterales;f__Steroidobacteraceae;g__SCUD01;s__Unclassified	0.608295	0.797143	0	0	0	0.256309	0	0.1426	0	0.347478	0	0.107882	0.192314	0	0	0	0	0	0	0.114115	0	0	0.391788	0.0727539	0.438685	0	0	0
MAG126	d__Bacteria;p__Nitrospirota;c__Nitrospiria;o__Nitrospirales;f__Nitrospiraceae;g__Nitrospira_F;s__Unclassified	0.277402	0.271964	0	0	0	0.395794	0	0	0	0.177532	0	0.169136	0	0	0	0.452381	0.10325	0.0675557	0	0	0	0	0.330298	0.0931966	0.905293	0	0	0
MAG135	d__Bacteria;p__Actinomycetota;c__Acidimicrobiia;o__UBA5794;f__ZC4RG35;g__Unclassified;s__Unclassified	0.28738	0.090914	0	0	0.125696	0	0.484828	0	0	0.741668	0	0.0810414	0.166173	0	0.353219	0.372094	0	0.510331	0	0	0.123473	1.01594	0.406225	0.0817369	0	0	0.0566335	2.14128
MAG137	d__Bacteria;p__Desulfobacterota_B;c__Binatia;o__UBA9968;f__UBA9968;g__WHTF01;s__Unclassified	0.675118	0.263383	0.823824	0	0.921199	0.938052	0.160544	1.11876	0	1.10237	0	0.460988	0.786776	0	0.423717	0.615332	0.302315	0.455681	1.72189	1.47165	0.163432	0.977589	0.984215	0.284882	0.120014	0	1.07305	1.23536
MAG141	d__Bacteria;p__Acidobacteriota;c__Vicinamibacteria;o__Vicinamibacterales;f__UBA2999;g__JACCSI01;s__Unclassified	0	0	0	0	0	0	0	0	0	0	0	0	0	0	0	0	0	0	0	0	0	0.150911	0	0	0	0	0	0.133924
MAG144	d__Bacteria;p__Acidobacteriota;c__Blastocatellia;o__Pyrinomonadales;f__Pyrinomonadaceae;g__PSRF01;s__Unclassified	0.58297	0.126168	0	0	0	0.221963	0.315809	0	0	0.664129	0	0	0	0	0.163781	0.378342	3.67376	0.338848	0.12321	0.115929	0.793295	0.151216	0.303071	0	0	0	0.049288	0
MAG145	d__Bacteria;p__Actinomycetota;c__Thermoleophilia;o__Solirubrobacterales;f__70-9;g__RHKX01;s__Unclassified	0	0	0	0	0	0	0	0.0877509	0	0	0	0	0	0	0	0	0.0862973	0	0	0	0	0	0	0	0	0	0	0
MAG147	d__Bacteria;p__Nitrospirota;c__Nitrospiria;o__Nitrospirales;f__Nitrospiraceae;g__Nitrospira_F;s__Unclassified	2.76202	1.31598	2.98364	1.39594	1.23975	3.66276	1.70113	1.50651	0.218997	5.32144	2.05375	1.0954	1.24921	1.76829	1.60181	0.38117	3.42012	3.94277	0.532501	1.43635	4.79787	0	1.90912	0.580672	2.56097	2.29595	0.0405569	0
MAG149	d__Bacteria;p__Actinomycetota;c__Actinomycetia;o__Propionibacteriales;f__Nocardioidaceae;g__Nocardioides;s__Unclassified	0	0	0	0.325093	0.169503	0	0.0753897	0	0	0	0.302598	0	0	0.290134	0.159337	0	0	0.12067	0	0	0	0	0	0	0	0	0.043639	0
MAG15	d__Bacteria;p__Cyanobacteriota;c__Cyanobacteriia;o__Cyanobacteriales;f__Coleofasciculaceae;g__Allocoleopsis;s__Unclassified	0	0	0.235358	0	0	0	0.543899	0	0	0	0	0	0.760463	0	0	0	0	0.758903	0	0	0.409024	0.462818	0	0	0	0	0.473651	0
MAG153	d__Bacteria;p__Actinomycetota;c__Actinomycetia;o__Actinomycetales;f__Dermatophilaceae;g__Ornithinicoccus;s__Ornithinicoccus ciconiae	0	0.559847	0	0	0	0	0	0	0	0	0	0	0	0	0	0	0	0	0	0	0	0	0	0	0	0	0	0
MAG154	d__Bacteria;p__Pseudomonadota;c__Alphaproteobacteria;o__Rhizobiales;f__Xanthobacteraceae;g__Bradyrhizobium;s__Unclassified	0	0	0	0	0	0	0	0	0.283383	0	0	0	0	0	0	0	0	0	0	0	0	0	0	0	0	0	0	0
MAG159	d__Bacteria;p__Actinomycetota;c__Actinomycetia;o__Actinomycetales;f__Microbacteriaceae;g__Microbacterium;s__Microbacterium sp943181415	0	0.0972512	0	0	0	0	0	0	0	0	0	0	0	0	0	0	0	0	0	0	0	0	0	0	0	0	0	0
MAG160	d__Bacteria;p__Actinomycetota;c__Actinomycetia;o__Propionibacteriales;f__Nocardioidaceae;g__Marmoricola;s__Unclassified	3.02928	1.36302	0.74998	0	1.53108	1.05413	0.376765	5.53416	0	2.29806	0	0.933694	0	0	1.80521	2.21947	2.54792	1.78335	0.628411	0.410808	0.539354	0.124739	0.684067	0.88824	0.991464	0	0.126825	0.0575743
MAG165	d__Bacteria;p__Actinomycetota;c__Actinomycetia;o__Propionibacteriales;f__Nocardioidaceae;g__Nocardioides;s__Unclassified	5.15924	3.79213	0.508351	2.75228	0.441098	1.74626	0.469687	0.742733	0.879794	3.05459	6.00257	0.476886	0.386108	8.4034	3.73916	3.1323	0.966466	1.12961	0.420328	0.280901	1.29897	0.169612	0.886692	0.326228	2.58296	4.78248	0.186551	0.0784759
MAG172	d__Bacteria;p__Acidobacteriota;c__Vicinamibacteria;o__Unclassified;f__Unclassified;g__Unclassified;s__Unclassified	0	0	0	0	0	0	0	0	0.340514	0	0.297986	0	0	0	0	0	0	0	0	0	0	0	0	0	0	0	0	0
MAG173	d__Bacteria;p__Chloroflexota;c__Anaerolineae;o__Anaerolineales;f__EnvOPS12;g__UBA12294;s__Unclassified	0	0	0	0	0	0	0	0	0	0	0	0	1.78349	0	0	0	0	0	0	0	0	0.13679	0	0	0	0	0	0.381987
MAG174	d__Bacteria;p__Actinomycetota;c__Actinomycetia;o__Actinomycetales;f__Micrococcaceae;g__Arthrobacter;s__Arthrobacter oxydans	1.14836	2.27071	0.259497	0	0.104377	0.23892	0.475576	0	0	0.574023	0	0	0.394134	0	0.411063	0.560683	0	0.263977	0	0	0	0.141249	0.224864	0	0	0	0.222008	0.226411
MAG177	d__Archaea;p__Thermoproteota;c__Nitrososphaeria;o__Nitrososphaerales;f__Nitrososphaeraceae;g__Nitrosocosmicus;s__Nitrosocosmicus oleophilus	0.341266	0.192492	0.504576	0.811546	0.7077	0.772034	0.195289	0.164313	0.493543	0.690927	0.747105	0.421987	0.258241	0.801278	1.02048	0.810217	0.828244	0.285051	0.481298	0.561782	0.491586	0.156971	0.615433	0.222887	1.41092	0.862348	0.141783	0.0714064
MAG18	d__Bacteria;p__Pseudomonadota;c__Gammaproteobacteria;o__Pseudomonadales;f__Moraxellaceae;g__Acinetobacter;s__Acinetobacter pseudolwoffii	0	0	0	0	0	0	0	0	0	0	0	0	0	0	0	0	0	0.0900844	0	0	0	0	0	0	0	0	0	0
MAG181	d__Bacteria;p__Actinomycetota;c__Actinomycetia;o__Actinomycetales;f__Dermatophilaceae;g__Unclassified;s__Unclassified	0.483866	0.248478	0.356939	2.13211	0.401025	0.434428	1.62413	0.433636	1.62149	0.459243	2.92799	0.436325	0	3.34182	0.59789	0.635413	2.28013	3.47933	0.387654	0.193634	0.984757	0.0804745	0.208215	0.246102	0.579994	2.42641	0.072701	0
MAG186	d__Bacteria;p__Pseudomonadota;c__Gammaproteobacteria;o__Burkholderiales;f__Burkholderiaceae_B;g__Ramlibacter;s__Unclassified	0	0	0.240586	0.767351	0	0	0.147556	0	0.705452	0	0.553197	0	0	0.440986	0.182794	0	0.108607	0	0	0	0.195837	0	0	0	0	0.482566	0	0
MAG19	d__Bacteria;p__Gemmatimonadota;c__Gemmatimonadetes;o__Gemmatimonadales;f__Gemmatimonadaceae;g__JABFXC01;s__Unclassified	0	0	0	0.3925	0	0	0	0	1.71359	0	0.37099	0	0	0.223338	0	0	0	0	0	0	0	0	0	0	0	0.315596	0	0
MAG190	d__Bacteria;p__Acidobacteriota;c__Vicinamibacteria;o__Vicinamibacterales;f__2-12-FULL-66-21;g__JACDCA01;s__Unclassified	0	0	0	0	0	0	0	0	0	0	0	0	0	0	0	0.166719	0	0	0	0	0	0	0	0	0	0	0	0
MAG191	d__Bacteria;p__Tectomicrobia;c__Entotheonellia;o__Entotheonellales;f__Entotheonellaceae;g__SXND01;s__Unclassified	0.227952	0	0.146925	0.404136	0.507919	0.258547	0.222919	2.71606	0	0.66624	0.209625	0.721388	0	0.25382	0.221594	0	0.569911	0.267861	2.17774	1.86235	0.851495	0	0.57128	0.51452	0.377403	0.335442	0.0752431	0
MAG192	d__Bacteria;p__Bacteroidota;c__Bacteroidia;o__Chitinophagales;f__Chitinophagaceae;g__Flavisolibacter;s__Unclassified	0	0	0	0.656142	0	0	0	0	1.05877	0	0.589877	0	0	0.432739	0	0	0	0	0	0	0	0	0	0	0	0.404603	0	0
MAG194	d__Bacteria;p__Acidobacteriota;c__Blastocatellia;o__Pyrinomonadales;f__Pyrinomonadaceae;g__Unclassified;s__Unclassified	0	0	0.129277	0	0	0	0.318262	0	0	0	0	0	0	0	0	0	0	0	0	0	0	0	0	0	0	0	0	0
MAG195	d__Bacteria;p__Nitrospirota;c__Nitrospiria;o__Nitrospirales;f__Nitrospiraceae;g__Nitrospira_F;s__Unclassified	0.394139	0.333932	0	0	0	0.681675	0	0	0	0.272195	0	0.218683	0.293475	0	0.0797613	0.756825	0.118303	0.0860971	0	0	0	0	0.491311	0.123471	0.9261	0	0	0
MAG196	d__Bacteria;p__Pseudomonadota;c__Gammaproteobacteria;o__Xanthomonadales;f__Xanthomonadaceae;g__Thermomonas;s__Unclassified	0	0	0	0	0	0	0	0	0	0	0	0	0	0	0	0	0.530177	0	0	0	0	0	0	0	0	0	0	0
MAG198	d__Bacteria;p__Pseudomonadota;c__Alphaproteobacteria;o__Rhizobiales;f__Xanthobacteraceae;g__Nitrobacter;s__Unclassified	0	0.243186	0.17609	0	0.140966	0.189465	0	0	0	0	0	0	0.247116	0	0	0.238264	0.152148	0.0784202	0	0	0	0	0	0	0.349212	0	0.0911869	0
MAG20	d__Bacteria;p__Nitrospirota;c__Nitrospiria;o__Nitrospirales;f__Nitrospiraceae;g__Nitrospira_F;s__Unclassified	2.51451	3.28181	0.190326	0	0	1.955	1.22453	0	0	3.34157	0	0	0.31795	0	0.8588	0.248587	2.20366	2.81958	0	0	1.87606	0	2.39218	0	2.35814	0	0	0
MAG204	d__Bacteria;p__Pseudomonadota;c__Gammaproteobacteria;o__Steroidobacterales;f__Steroidobacteraceae;g__SCUD01;s__Unclassified	0	0.273971	0	0	0	0	0	0	0	0	0	0	0	0	0	0	0	0	0	0	0	0	0	0	0	0	0	0
MAG206	d__Bacteria;p__Actinomycetota;c__Actinomycetia;o__Actinomycetales;f__Microbacteriaceae;g__Agromyces;s__Unclassified	0	0.498075	0	0	0	0.46305	0	0	0	0	0	0	0	0	0.230549	0.343846	0.555154	0.0979736	0	0	0.0936235	0	0	0	0	0	0.051852	0
MAG208	d__Bacteria;p__Bacteroidota;c__Bacteroidia;o__Chitinophagales;f__Chitinophagaceae;g__Flavitalea;s__Unclassified	0.389551	1.0555	0.285314	0	0	0	0.0742265	0	0	0.165717	0	0	0.452226	0	0.183302	0.558117	1.21567	0.389186	0	0	0.23085	0.0797127	0	0.0670386	0	0	0.194147	0.0458127
MAG209	d__Bacteria;p__Pseudomonadota;c__Gammaproteobacteria;o__Burkholderiales;f__Burkholderiaceae_A;g__Unclassified;s__Unclassified	0	0	0	0	0	0.310887	0	0	0	0	0	0	0	0	0	0	0	0	0	0	0	0	0	0	0.582354	0	0	0
MAG210	d__Bacteria;p__Bacteroidota;c__Bacteroidia;o__Chitinophagales;f__Chitinophagaceae;g__Unclassified;s__Unclassified	0	0	0	3.39832	0.185098	0	0	0	0.487406	0	1.36282	0	0	1.73325	0	0	0.214273	0	0	0.172052	0.291515	0	0	0	0	2.4468	0	0
MAG212	d__Bacteria;p__Actinomycetota;c__Actinomycetia;o__Actinomycetales;f__Micrococcaceae;g__Kocuria;s__Kocuria rosea	0	0.275194	0	0	0	0.186324	0	0	0	0	0	0	0.389827	0	0.198106	0.345555	0	0	0	0	0	0	0	0	0.178295	0	0.0539446	0.0585052
MAG218	d__Bacteria;p__Pseudomonadota;c__Gammaproteobacteria;o__Burkholderiales;f__SG8-39;g__SCGC-AG-212-J23;s__Unclassified	0.842112	0.278712	0	0	0	0.690013	0.0991043	0.187356	0	1.18419	0	0.222245	0.400799	0	0.356886	1.1608	0.106056	0.0926394	0.270861	0.160245	0.420148	0.0648826	6.41927	0.207986	0.339098	0	0	0.130721
MAG219	d__Bacteria;p__Pseudomonadota;c__Alphaproteobacteria;o__Sphingomonadales;f__Sphingomonadaceae;g__Sphingomicrobium;s__Unclassified	0	0	0	0.493005	0	0	0	0	10.594	0	0.514042	0	0	0	0	0	0	0	0	0	0	0	0	0	0	0	0	0
MAG220	d__Bacteria;p__Chloroflexota;c__Limnocylindria;o__QHBO01;f__QHBO01;g__JACDBZ01;s__Unclassified	0	0.115388	0	0	0	0	0	0	0	0	0	0	0	0	0.304216	0	0.109123	0.074773	0	0	0	0	0	0	1.80909	0	0	0
MAG229	d__Archaea;p__Thermoproteota;c__Nitrososphaeria;o__Nitrososphaerales;f__Nitrososphaeraceae;g__Nitrososphaera;s__Unclassified	0	0	0.246968	0	0.140093	0	0	0.20983	0	0	0	0.105826	0	0	0	0	0	0	0.2328	0.224333	0	0.184048	0	0.0798534	0	0	0.156559	0
MAG23	d__Bacteria;p__Acidobacteriota;c__Vicinamibacteria;o__Vicinamibacterales;f__UBA2999;g__12-FULL-67-14b;s__Unclassified	0.448055	0.199237	0.328619	0	0.306745	0.481889	0.0882384	0.12256	0	0.362216	0	0.142451	1.17121	0	0.13381	0.472079	0.185671	0.166002	0	0	0	0.135358	0.181752	0	0.573569	0	0.21918	0.0613934
MAG233	d__Archaea;p__Thermoproteota;c__Nitrososphaeria;o__Nitrososphaerales;f__Nitrososphaeraceae;g__Nitrosocosmicus;s__Nitrosocosmicus oleophilus	0.337139	0.16587	0.734495	3.91026	1.07148	0.570555	0.199453	0.566279	2.68386	0.622965	4.41491	0.75902	0.348988	4.62268	0.972093	0.515007	0.271787	0.228595	0.724713	1.04553	0.46505	0.207013	0.597613	0.414531	1.75973	7.21838	0.256115	0.15005
MAG244	d__Bacteria;p__Actinomycetota;c__Thermoleophilia;o__Gaiellales;f__Gaiellaceae;g__JACCRW01;s__Unclassified	0	0	0	0	0	0	0	0	0.242091	0	0.194102	0	0	0	0	0	0	0	0	0	0	0	0	0	0	0	0	0
MAG247	d__Bacteria;p__Pseudomonadota;c__Gammaproteobacteria;o__Burkholderiales;f__Nitrosomonadaceae;g__Nitrosospira;s__Nitrosospira multiformis_D	1.37079	0.580441	0	0.899994	0.0793317	0.259548	1.81363	0	0	1.62095	0.800548	0.411595	0	0.929657	0.0849124	0	1.36474	0.517572	0	0.206465	4.40907	0	3.17272	0.115773	1.44975	1.20654	0	0
MAG249	d__Bacteria;p__Bacteroidota;c__Bacteroidia;o__Flavobacteriales;f__Weeksellaceae;g__Kaistella;s__Kaistella faecale	0	0	0	0	0	0	0	0	0	0	0	0	0	0	0	0	0.701716	0.0940727	0	0	0	0.0769052	0	0	0.162348	0	0	0.0830184
MAG25	d__Bacteria;p__Pseudomonadota;c__Alphaproteobacteria;o__Sphingomonadales;f__Sphingomonadaceae;g__Unclassified;s__Unclassified	0.219363	0.215121	0	0.366126	0.122407	0.269339	0	0	0	0	0.305098	0	0	0.330676	0.160944	0.217926	0.342368	0.0901176	0	0	0.149991	0	0	0	0.352782	0.31342	0.0640214	0
MAG250	d__Bacteria;p__Pseudomonadota;c__Alphaproteobacteria;o__ATCC43930;f__Stellaceae;g__Unclassified;s__Unclassified	0	0	0	0	0	0	0	0	0	0	0	0	0	0	0	0	0	0	0	0	0	0	0.151021	0	0	0	0	0
MAG257	d__Bacteria;p__Acidobacteriota;c__Thermoanaerobaculia;o__UBA5704;f__UBA5704;g__Unclassified;s__Unclassified	0	0	0	0	0	0.135487	0.148132	0	0	0	0	0	0	0	0	0	0	0	0	0	0	0	0	0	0	0	0	0
MAG260	d__Bacteria;p__Pseudomonadota;c__Alphaproteobacteria;o__Acetobacterales;f__Acetobacteraceae;g__CADCTG01;s__Unclassified	0	0	0.329868	0	0	0	0	0	0	0	0.298147	0	2.99606	0	0	0	0	0	0	0	0	0.0717182	0	0	0	0	0.0985243	0.0641772
MAG265	d__Bacteria;p__Acidobacteriota;c__Vicinamibacteria;o__Vicinamibacterales;f__UBA2999;g__JACCSI01;s__Unclassified	0	0	0	0	0.105562	0	0	0	0	0	0	0	0.180526	0	0.0808604	0	0	0	0	0	0	2.93126	0	0	0	0	0.0752193	3.9842
MAG271	d__Bacteria;p__Myxococcota;c__Polyangia;o__Nannocystales;f__Nannocystaceae;g__Nannocystis;s__Unclassified	0	0.146901	0	0	0	0	0	0	0	0	0	0	0	0	0	0	0	0	0	0	0	0	0	0	0	0	0	0
MAG273	d__Bacteria;p__Pseudomonadota;c__Alphaproteobacteria;o__Rhodobacterales;f__Rhodobacteraceae;g__Paracoccus;s__Paracoccus sp021491915	0.406589	1.66088	0.444695	0	0.195901	0.428046	0.162566	0	0	0	0	0	0.682254	0	0.497587	0.767375	0.391419	0.224244	0	0	0	0.116501	0	0	0.370828	0	0.400879	0.117154
MAG277	d__Bacteria;p__Pseudomonadota;c__Alphaproteobacteria;o__Rhizobiales;f__Hyphomicrobiaceae;g__AWTP1-13;s__Unclassified	1.23154	0.44012	0.472528	0.444192	0.657182	1.09249	0.54547	1.09889	0	1.52677	0.440192	0.928037	0.290333	0.405446	0.287933	0.753636	1.06511	0.855829	1.17514	1.2616	0.978907	0.667485	4.33556	0.510127	0.833945	0.422756	0.863399	0.598527
MAG278	d__Bacteria;p__Acidobacteriota;c__Vicinamibacteria;o__Vicinamibacterales;f__UBA2999;g__12-FULL-67-14b;s__Unclassified	0	0	0	0	0	0	0	0	0	0	0	0	0	0	0	0	0	0	0	0	0	0	0.480607	0	0	0	0	0
MAG29	d__Bacteria;p__Actinomycetota;c__Actinomycetia;o__Propionibacteriales;f__Propionibacteriaceae;g__Brevilactibacter;s__Unclassified	0	0	0	0	0	0.424301	0	0	0	0	0	0	0.200288	0	0	0.197189	0	0	0	0	0	0	0	0	0	0	0	0.0491582
MAG290	d__Bacteria;p__Actinomycetota;c__Actinomycetia;o__Actinomycetales;f__Dermatophilaceae;g__Lapillicoccus;s__Unclassified	0.508912	0.301692	0.270806	0.661647	0.454161	0.260833	1.58428	0.411913	0.571547	0.411272	0.746265	0.237543	0	0.959142	0.472093	0.513132	1.51361	3.13971	0.259361	0.131086	0.683317	0.0692534	0.142386	0.137568	0.278936	0.682678	0.0633911	0
MAG291	d__Bacteria;p__Pseudomonadota;c__Gammaproteobacteria;o__Pseudomonadales;f__Cellvibrionaceae;g__Cellvibrio;s__Unclassified	0	0	0	0	0	0	0	0	0	0	0	0	0	0	0	0.516624	0	0	0	0	0	0	0	0	0	0	0	0
MAG292	d__Bacteria;p__Pseudomonadota;c__Alphaproteobacteria;o__Rhodobacterales;f__Rhodobacteraceae;g__Paracoccus;s__Paracoccus sp021491915	0.395957	0.760305	0.381137	0	0.168048	0.503558	0.199107	0	0	0	0	0	0.777786	0	0.553426	0.86024	0.456245	0.266447	0	0	0	0.118793	0	0	0.341065	0	0.367894	0.133799
MAG293	d__Bacteria;p__Actinomycetota;c__Thermoleophilia;o__Solirubrobacterales;f__70-9;g__RHKX01;s__Unclassified	0	0	0	0	0	0	0	0.0995896	0	0	0	0	0	0	0	0	0.0906083	0	0	0	0	0	0	0	0.121965	0	0	0
MAG294	d__Bacteria;p__Actinomycetota;c__Actinomycetia;o__Actinomycetales;f__Dermatophilaceae;g__F2B08;s__Unclassified	0	0	0	0	0	0	0	0	0	0	0	0	0.632235	0	0	0	0	0	0	0	0	0	0	0	0	0	0	0
MAG295	d__Archaea;p__Thermoproteota;c__Nitrososphaeria;o__Nitrososphaerales;f__Nitrososphaeraceae;g__Nitrosocosmicus;s__Nitrosocosmicus oleophilus	0.352353	0.197448	0.505993	0.822903	0.718469	0.765455	0.196176	0.163367	0.486546	0.712621	0.756474	0.419781	0.277335	0.829517	1.0486	1.31884	0.479913	0.282109	0.473301	0.547192	0.449917	0.158569	0.618664	0.217997	1.47677	0.888843	0.130775	0.0680396
MAG297	d__Bacteria;p__Acidobacteriota;c__Thermoanaerobaculia;o__UBA5704;f__UBA5704;g__UBA5704;s__Unclassified	0	0	0	0	0	0	0	0	0	0	0	0	0	0	7.6522	0	0	0	0	0	0	0	0	0	0	0	0	0
MAG298	d__Bacteria;p__Pseudomonadota;c__Alphaproteobacteria;o__Rhizobiales;f__Beijerinckiaceae;g__Unclassified;s__Unclassified	0	0	0.349643	0	0.490399	0.237353	0	0	0	0	0	0.070751	1.22981	0	0.143679	0.267215	0	0	0.161838	0	0	0.221082	0	0.0622034	0.137663	0	0.298142	0.175777
MAG303	d__Bacteria;p__Actinomycetota;c__Actinomycetia;o__Actinomycetales;f__Micrococcaceae;g__Kocuria;s__Kocuria rosea	0.187652	0.489598	0.139695	0	0	0.310242	0	0	0	0	0	0	0.686542	0	0.343625	0.565944	0	0	0	0	0	0.0618877	0	0	0.314188	0	0.097669	0.0986744
MAG309	d__Bacteria;p__Cyanobacteriota;c__Cyanobacteriia;o__Cyanobacteriales;f__Microcoleaceae;g__Microcoleus;s__Unclassified	0	0	1.03585	0	0.135523	0.695544	0.250339	0.3126	0	0	0.324684	0.149712	1.17002	0.431303	0	0.188934	0.197519	0.227138	0.13332	0	1.42932	1.98591	0	0.323261	0	0	2.27971	0.24407
MAG310	d__Bacteria;p__Nitrospirota;c__Nitrospiria;o__Nitrospirales;f__Nitrospiraceae;g__Nitrospira_F;s__Unclassified	0	0	0	0	0	0	0	0	0	0	0	0	0	0	0	0	0	0	0	0	0	0	0.222135	0	0	0	0	0
MAG311	d__Bacteria;p__Pseudomonadota;c__Alphaproteobacteria;o__Rhodobacterales;f__Rhodobacteraceae;g__Paracoccus;s__Paracoccus sp021491915	0.322851	0.62574	0.353485	0	0.14777	0.417821	0.148809	0	0	0	0	0	0.580461	0	0.459137	1.82078	0.376282	0.199081	0	0	0	0.101221	0	0	0.302053	0	0.321225	0.10665
MAG312	d__Bacteria;p__Cyanobacteriota;c__Cyanobacteriia;o__Cyanobacteriales;f__PCC-6304;g__Unclassified;s__Unclassified	0	0	0	0	0	0	0	0	0	0	0	0	0	0	0	0	0	0	0	0	0	0	0	0	0	0	0.0455619	0
MAG314	d__Bacteria;p__Actinomycetota;c__Actinomycetia;o__Propionibacteriales;f__Nocardioidaceae;g__Nocardioides;s__Unclassified	4.88046	3.79299	0.609204	1.85416	0.560007	1.68933	0.392333	0.678044	0.380786	4.56321	4.33718	0.410226	0.486739	4.85258	3.42715	2.88952	0.767633	0.797602	0.449224	0.299079	1.04363	0.342381	0.889284	0.302447	2.54361	3.52597	0.355004	0.111884
MAG316	d__Bacteria;p__Actinomycetota;c__Actinomycetia;o__Actinomycetales;f__Dermatophilaceae;g__Ornithinimicrobium;s__Unclassified	0	0	0	0	0	0	0	0	0	0	0	0	0.660705	0	0	0	0	0	0	0	0	0	0	0	0	0	0	0
MAG322	d__Bacteria;p__Pseudomonadota;c__Alphaproteobacteria;o__Rhodobacterales;f__Rhodobacteraceae;g__Paracoccus;s__Paracoccus sp021491915	0.275825	0.553119	0.224639	0	0.0971634	0.356435	0.109984	0	0	0	0	0	0.532262	0	0.370675	0.619635	0.253798	0.152972	0	0	0	0.0655296	0	0	0.217705	0	0.22611	0.0813711
MAG33	d__Bacteria;p__Pseudomonadota;c__Alphaproteobacteria;o__Sphingomonadales;f__Sphingomonadaceae;g__Sphingomicrobium;s__Unclassified	0	0	0	0.791589	0	0	0	0	1.56007	0	0.849278	0	0	0.491332	0	0	0	0	0	0	0	0	0	0	0	0.407716	0	0
MAG332	d__Bacteria;p__Pseudomonadota;c__Alphaproteobacteria;o__Rhodobacterales;f__Rhodobacteraceae;g__Paracoccus;s__Paracoccus sp021491915	0.612251	1.18693	0.736329	0	0.322555	0.626272	0.240314	0	0	0.157358	0	0	0.991221	0	0.740048	1.10886	0.584931	0.34046	0	0	0	0.186317	0.122845	0	0.572304	0	0.901796	0.174704
MAG333	d__Bacteria;p__Bacteroidota;c__Bacteroidia;o__Chitinophagales;f__Chitinophagaceae;g__Ferruginibacter;s__Unclassified	0	0	4.04199	0	2.51706	0.107011	0	0	0	0	0	0.146619	0	0	0.12278	0	0	0	0.244636	0.111399	0	1.57544	0	0.195609	0.14652	0	3.13193	0.0891665
MAG335	d__Bacteria;p__Pseudomonadota;c__Gammaproteobacteria;o__Burkholderiales;f__SG8-39;g__SCGC-AG-212-J23;s__Unclassified	0	0	0.137719	0	0.277127	0.156614	0	2.49093	0	0.14537	0	1.65316	0	0	0	0	0	0	2.74868	2.22983	0.101019	0.0534316	0	1.12432	0	0	0.058213	0
MAG336	d__Bacteria;p__Acidobacteriota;c__Vicinamibacteria;o__Vicinamibacterales;f__UBA2999;g__JACCSI01;s__Unclassified	0	0	0	0	0	0	0	0	0	0	0	0	0	0	0	0	0	0	0	0	0	0.176743	0	0	0	0	0	0.145142
MAG339	d__Bacteria;p__Nitrospirota;c__Nitrospiria;o__Nitrospirales;f__Nitrospiraceae;g__Nitrospira_C;s__Unclassified	0.187466	0	0.585924	0	1.64678	0.37366	0	0.579178	0	0.382154	0	0.451097	0.337165	0	0.208532	0.411861	0	0	1.35299	0.93034	0	1.551	0.357332	0.375634	0	0	1.4192	1.77998
MAG340	d__Bacteria;p__Pseudomonadota;c__Alphaproteobacteria;o__Sphingomonadales;f__Sphingomonadaceae;g__Sphingomicrobium;s__Unclassified	0	0	0	0.739454	0	0	0	0	1.5094	0	0.821543	0	0	0.486945	0	0	0	0	0	0	0	0	0	0	0	0.385983	0	0
MAG342	d__Archaea;p__Thermoproteota;c__Nitrososphaeria;o__Nitrososphaerales;f__Nitrososphaeraceae;g__Nitrosocosmicus;s__Unclassified	0.243311	0.141952	0.721383	0	0.651038	0.347867	0.111008	0.233814	0	0.369793	0.424767	0.307463	1.10581	0.445605	0.420198	0.251825	0.132487	0.125945	0.384616	0.382888	0.352496	1.73417	0.210274	0.278469	0.706256	0.451646	0.851044	0.715111
MAG344	d__Bacteria;p__Actinomycetota;c__Actinomycetia;o__Actinomycetales;f__Dermatophilaceae;g__F2B08;s__Unclassified	0	0	0	0	0	0	0	0	0	0	0	0	0.700532	0	0	0	0	0	0	0	0	0	0	0	0	0	0	0
MAG347	d__Archaea;p__Thermoproteota;c__Nitrososphaeria;o__Nitrososphaerales;f__Nitrososphaeraceae;g__Nitrososphaera;s__Unclassified	0	0	0.271002	0	0.164433	0	0	0.236277	0	0	0	0.112864	0	0	0	0	0	0	0.262447	0.251565	0	0.12347	0	0.0759764	0	0	0.0896656	0
MAG35	d__Bacteria;p__Pseudomonadota;c__Gammaproteobacteria;o__Burkholderiales;f__SG8-39;g__SCGC-AG-212-J23;s__Unclassified	0	0	0	0	0.210174	0.165971	0	3.29182	0	0	0	1.92209	0	0	0	0	0	0	1.80578	2.36513	0	0.0504291	0	1.32635	0	0	0.0459078	0
MAG350	d__Bacteria;p__Chloroflexota;c__Limnocylindria;o__QHBO01;f__Unclassified;g__Unclassified;s__Unclassified	0	0	0	0	0	0	0	0	0	0	0	0	0.557122	0	0	0	0	0	0	0	0	0	0	0	0	0	0	0.051727
MAG356	d__Bacteria;p__Pseudomonadota;c__Alphaproteobacteria;o__Rhizobiales;f__Xanthobacteraceae;g__Tardiphaga;s__Unclassified	0	0	0	0.308941	0	0	0	0	0.482145	0	0	0	0	0	0	0	0	0	0	0	0	0	0	0	0	0	0	0
MAG358	d__Bacteria;p__Bacteroidota;c__Bacteroidia;o__Chitinophagales;f__Chitinophagaceae;g__Flavisolibacter;s__Unclassified	0.514995	0.180225	3.01634	0	1.39846	0.178994	0.205924	0.178529	0	0.214584	0	0.14809	0	0	0.28844	0.55476	1.39031	0.494726	0.245566	0	0.762699	0.534379	0	0	0	0	2.38483	0.0461604
MAG372	d__Bacteria;p__Nitrospirota;c__Nitrospiria;o__Nitrospirales;f__Nitrospiraceae;g__Nitrospira_F;s__Unclassified	3.00424	2.1584	0.254963	0	0	1.60972	0.959833	0	0	2.70948	0	0	0.282477	0	0.688816	0.216816	1.73787	2.1445	0	0	1.55676	0	1.86368	0	1.92352	0	0	0
MAG373	d__Bacteria;p__Actinomycetota;c__Thermoleophilia;o__Solirubrobacterales;f__70-9;g__RHKX01;s__Unclassified	0	0	0	0	0	0	0	0.114247	0	0	0	0	0	0	0	0	0.10367	0	0.106606	0	0	0	0.110115	0	0.135978	0	0	0
MAG375	d__Bacteria;p__Actinomycetota;c__Thermoleophilia;o__Gaiellales;f__Gaiellaceae;g__GMQP-bins7;s__Unclassified	0.73223	0.380427	0.690251	0	1.62216	0.751605	0.427368	1.84669	0	1.08324	0.349841	0.945755	0	0.377137	0.860205	0.518068	1.51659	1.5616	3.48697	2.28686	0.886427	1.2379	1.50141	0.573009	0.697933	0.319859	1.21433	1.63802
MAG376	d__Bacteria;p__Nitrospirota;c__Nitrospiria;o__Nitrospirales;f__Nitrospiraceae;g__Nitrospira_C;s__Unclassified	0	0	0	0	0.190984	0.107911	0	0.233372	0	0	0	0.156962	0	0	0	0	0	0	0.223842	0.212449	0	0.173424	0	0.118518	0	0	0.139799	0.166048
MAG38	d__Bacteria;p__Actinomycetota;c__Actinomycetia;o__Actinomycetales;f__Dermatophilaceae;g__Terrabacter;s__Unclassified	0	0	0	0	0	0	0	0	0	0	0	0	0	0.249086	0	0	0	0	0	0	0	0	0	0	0	0	0	0
MAG380	d__Archaea;p__Thermoproteota;c__Nitrososphaeria;o__Nitrososphaerales;f__Nitrososphaeraceae;g__Nitrosocosmicus;s__Nitrosocosmicus oleophilus	0.234797	0.133408	0.409552	0.595026	0.589927	0.440497	0.276442	0.161103	0.336552	0.442271	0.593553	0.328024	0.252622	0.663825	0.649839	0.705853	0.324422	1.52365	0.390929	0.428286	0.466875	0.194013	0.350458	0.187953	1.06222	0.723809	0.156084	0.0662536
MAG383	d__Bacteria;p__Pseudomonadota;c__Gammaproteobacteria;o__Pseudomonadales;f__Moraxellaceae;g__Acinetobacter;s__Acinetobacter pseudolwoffii	0	0	0	0	0	0	0	0	0	0	0	0	0	0	0	0	0	0.0767335	0	0	0	0	0	0	0	0	0	0
MAG385	d__Bacteria;p__Actinomycetota;c__Acidimicrobiia;o__Acidimicrobiales;f__JAAYBP01;g__Unclassified;s__Unclassified	0	0.221174	0	0	0	0	0	0	0	0	0	0	0	0	0	0	0.25306	0.0594833	0	0	0	0	0	0	0	0	0	0
MAG390	d__Bacteria;p__Gemmatimonadota;c__Gemmatimonadetes;o__Gemmatimonadales;f__Gemmatimonadaceae;g__AG11;s__Unclassified	0	0	0	0.752174	0	0	0	0	4.2442	0	0.63236	0	0	0.328724	0	0	0	0	0	0	0	0	0	0	0	0.435327	0	0
MAG397	d__Bacteria;p__Actinomycetota;c__Actinomycetia;o__Propionibacteriales;f__Nocardioidaceae;g__Aeromicrobium;s__Unclassified	0	0	0	0	0	0	0	0	0	0	0	0	0	0	0	0.215895	0.141309	0	0	0	0	0	0	0	0	0	0	0
MAG399	d__Bacteria;p__Acidobacteriota;c__Blastocatellia;o__Pyrinomonadales;f__Pyrinomonadaceae;g__PSRF01;s__Unclassified	0.321023	0.0981048	0.19669	0	0.203262	0.193912	0.241773	1.22474	0	0.356808	0.231003	0.481949	0	0	0	0.135887	2.14981	0.265602	0.871744	0.854137	1.23446	0.06135	0.468927	0.336176	0	0	0.0674586	0
MAG403	d__Bacteria;p__Pseudomonadota;c__Alphaproteobacteria;o__Caulobacterales;f__Caulobacteraceae;g__Brevundimonas;s__Brevundimonas sp002979535	0	0.241156	0	0	0	0	0.112385	0	0	0	0	0	0	0	0	4.42857	0.935545	0.187609	0	0	0	0	0	0	0	0	0.0954244	0
MAG404	d__Bacteria;p__Gemmatimonadota;c__Gemmatimonadetes;o__Gemmatimonadales;f__Gemmatimonadaceae;g__JABFXC01;s__Unclassified	0	0	0	0.386338	0	0	0	0	1.79414	0	0.344952	0	0	0.196105	0	0	0	0	0	0	0	0	0	0	0	0.308166	0	0
MAG406	d__Bacteria;p__Nitrospirota;c__Nitrospiria;o__Nitrospirales;f__Nitrospiraceae;g__Nitrospira_F;s__Unclassified	0.27516	0.257312	0	0	0	0.370842	0	0	0	0.181669	0	0.147059	0	0	0	0.38524	0.134861	0.0839664	0	0	0	0	0.312302	0.0804514	0.749381	0	0	0
MAG41	d__Bacteria;p__Pseudomonadota;c__Gammaproteobacteria;o__Pseudomonadales;f__Moraxellaceae;g__Acinetobacter;s__Acinetobacter bohemicus	0	0	0	0	0	0	0.118913	0	0	0	0	0	0	0	0	4.15555	0.137423	1.00368	0	0	0	0	0	0	0	0	0	0
MAG410	d__Bacteria;p__Pseudomonadota;c__Gammaproteobacteria;o__Steroidobacterales;f__Steroidobacteraceae;g__RPQJ01;s__Unclassified	0.185647	0.133374	0	0	0	0.549875	0	0	0	0	0	0	0.372957	0	0	0.201603	0.273098	0.0795613	0	0	0	0	0.137027	0	0.305519	0	0.0497622	0
MAG413	d__Archaea;p__Thermoproteota;c__Nitrososphaeria;o__Nitrososphaerales;f__Nitrososphaeraceae;g__TH1177;s__Unclassified	0	0	1.32888	0	1.04466	0.245399	0	0.880447	0	0	0.396759	0.992513	0	0.416194	0.210166	0	0	0	0.781727	1.32866	0	1.70439	0.156975	0.576922	0.466604	0.454501	1.53346	1.23796
MAG416	d__Bacteria;p__Pseudomonadota;c__Gammaproteobacteria;o__Xanthomonadales;f__Xanthomonadaceae;g__Lysobacter_B;s__Lysobacter_B sp011300685	0	0	0	0	0	0	0	0	0	0	0	0	0	0	0	0	0.51878	0	0	0	0	0	0	0	0	0	0	0
MAG419	d__Bacteria;p__Cyanobacteriota;c__Cyanobacteriia;o__Cyanobacteriales;f__Chroococcidiopsidaceae;g__Chroococcidiopsis;s__Chroococcidiopsis thermalis	0	0	0	0	0	0	0	0	0	0	0	0	0.715722	0	0	0	0	0	0	0	0	0	0	0	0	0	0	0
MAG420	d__Bacteria;p__Pseudomonadota;c__Alphaproteobacteria;o__Sphingomonadales;f__Sphingomonadaceae;g__Sphingomicrobium;s__Unclassified	0.179279	0.326824	0	0	0	0	0	0	0	0	0	0	0	0	0	0	0	0	0	0	0	0	0	0	0	0	0	0
MAG422	d__Bacteria;p__Cyanobacteriota;c__Cyanobacteriia;o__Cyanobacteriales;f__Coleofasciculaceae;g__Unclassified;s__Unclassified	0	0	0	0	0	0	0	0	0	0	0	0	0	0	0	0	0	0	0	0	0.119034	0.497984	0	0	0	0	0.232772	0.0539201
MAG423	d__Bacteria;p__Bacteroidota;c__Bacteroidia;o__Cytophagales;f__Cyclobacteriaceae;g__Chryseolinea;s__Unclassified	0.4845	0.473468	2.02801	0	2.32358	1.3708	0	0	0	0.372001	0.220959	0.42929	0.216242	0.318384	0.221246	1.39098	0.108344	0.144358	0.233606	0.111095	0	0.753776	0.130247	0.356811	2.29398	0.414339	1.2292	0.139381
MAG428	d__Bacteria;p__Actinomycetota;c__Actinomycetia;o__Actinomycetales;f__Microbacteriaceae;g__Microbacterium;s__Unclassified	0	0.164033	0	0	0	0	0	0	0	0	0	0	0	0	0	0.109432	0	0	0	0	0	0	0	0	0	0	0	0
MAG436	d__Archaea;p__Thermoproteota;c__Nitrososphaeria;o__Nitrososphaerales;f__Nitrososphaeraceae;g__Nitrosocosmicus;s__Nitrosocosmicus oleophilus	0.321029	0.19368	0.405791	0.705829	0.506073	0.775092	0.184748	0.125497	0.450413	0.67943	0.5895	0.338519	0.211852	0.64938	1.01795	0.828288	0.475959	0.281296	0.3703	0.433707	0.456806	0.126169	0.645475	0.172468	1.15694	0.693106	0.0866189	0.0464573
MAG439	d__Bacteria;p__Nitrospirota;c__Nitrospiria;o__Nitrospirales;f__Nitrospiraceae;g__Nitrospira_C;s__Unclassified	0.143441	0	0.48723	0	1.39076	0.31217	0	0.526186	0	0.313855	0	0.40193	0.302749	0	0.174673	0.353371	0	0	1.14536	0.813037	0	1.827	0.288578	0.330536	0	0	1.06619	1.58966
MAG440	d__Bacteria;p__Actinomycetota;c__Actinomycetia;o__Actinomycetales;f__Microbacteriaceae;g__Leucobacter;s__Unclassified	0.193635	7.0929	0	0	0	0	0	0	0	0	0	0	0	0	0	0	0	0	0	0	0	0	0	0	0	0	0	0
MAG441	d__Bacteria;p__Cyanobacteriota;c__Cyanobacteriia;o__Cyanobacteriales;f__Coleofasciculaceae;g__Allocoleopsis;s__Unclassified	0	0	0	0	0	0	2.60723	0	0	0	0	0	0.367009	0	0	0	0.163214	2.30955	0	0	0.88786	0	0	0	0	0	0	0
MAG445	d__Bacteria;p__Actinomycetota;c__Thermoleophilia;o__Solirubrobacterales;f__70-9;g__RHKX01;s__Unclassified	0	0	0	0	0	0	0	0	0	0	0	0	0	0	0	0	0.0821338	0	0	0	0	0	0	0	0	0	0	0
MAG446	d__Bacteria;p__Bacteroidota;c__Bacteroidia;o__Bacteroidales;f__Dysgonomonadaceae;g__Fermentimonas;s__Fermentimonas sp015478775	0	0.090191	0	0	0	0	0	0	0	0	0	0	0	0	0	0	0	0	0	0	0	0	0	0	0	0	0	0
MAG453	d__Bacteria;p__Bacteroidota;c__Bacteroidia;o__Chitinophagales;f__Chitinophagaceae;g__VBAS01;s__Unclassified	1.21289	0.10845	0.347689	3.33136	2.09629	0.149379	0.96956	2.01536	0.339846	2.03377	1.40616	1.93256	0	1.51932	0.149661	0.109129	1.90198	0.942836	1.88055	3.73838	1.78152	0	1.00626	0.994236	0	2.22584	0.111059	0
MAG457	d__Bacteria;p__Actinomycetota;c__Thermoleophilia;o__Gaiellales;f__Gaiellaceae;g__Gaiella;s__Unclassified	0	0	0	0	0.131144	0.232515	0	0.139125	0	0	0	0	0	0	0.186513	0	0.0941789	0	0	0	0	0.110194	0.288198	0	0.297733	0	0.132262	0.164326
MAG459	d__Bacteria;p__Pseudomonadota;c__Gammaproteobacteria;o__Pseudomonadales;f__Moraxellaceae;g__Acinetobacter;s__Acinetobacter pseudolwoffii	0	0	0	0	0	0	0	0	0	0	0	0	0	0	0	0	0	0.100472	0	0	0	0	0	0	0	0	0	0
MAG46	d__Bacteria;p__Acidobacteriota;c__Blastocatellia;o__Pyrinomonadales;f__Pyrinomonadaceae;g__UBA11740;s__Unclassified	0	0	0	0	0	0	0	0	0	0	0	0	0	0	0	0	0	0	0	0	0	0	0.122692	0	0	0	0	0
MAG462	d__Bacteria;p__Pseudomonadota;c__Gammaproteobacteria;o__Pseudomonadales;f__Moraxellaceae;g__Acinetobacter;s__Acinetobacter pseudolwoffii	0	0	0	0	0	0	0	0	0	0	0	0	0	0	0	0	0	0.0786202	0	0	0	0	0	0	0	0	0	0
MAG463	d__Bacteria;p__Actinomycetota;c__Thermoleophilia;o__Solirubrobacterales;f__70-9;g__RHKX01;s__Unclassified	0	0	0	0	0	0	0	0.103841	0	0	0	0	0	0	0	0	0.0892048	0	0.0956483	0	0	0	0	0	0.118836	0	0	0
MAG465	d__Archaea;p__Thermoproteota;c__Nitrososphaeria;o__Nitrososphaerales;f__Nitrososphaeraceae;g__TH1177;s__Unclassified	0	0	1.38568	0	0.872332	0.166914	0	0.860511	0	0	0.289681	1.0268	0	0.293231	0	0	0	0	0.735726	1.34293	0	1.66803	0	0.594581	0	0.322821	1.55708	1.27702
MAG466	d__Bacteria;p__Chloroflexota;c__Limnocylindria;o__Limnocylindrales;f__CSP1-4;g__SPCO01;s__Unclassified	0	0	0	0	0	0.12562	0	0	0	0	0	0	0.183428	0	0.0849076	0	0	0	0	0	0	0	0	0	0.19397	0	0.0489841	0
MAG467	d__Bacteria;p__Pseudomonadota;c__Gammaproteobacteria;o__Pseudomonadales;f__Pseudomonadaceae;g__Pseudomonas_E;s__Pseudomonas_E helleri	0	0	0	0	0	0	0.814409	0	0	0	0	0	0	0	0	0	0	2.43926	0	0	0	0	0	0	0	0	0	0
MAG471	d__Bacteria;p__Cyanobacteriota;c__Cyanobacteriia;o__Gloeomargaritales;f__Unclassified;g__Unclassified;s__Unclassified	6.40902	0	0	0	0	0	0	0	0	0	2.1876	28.5394	0	0	0	0	0	0	0.175181	0	0	0	0	47.9211	0.282322	0	0	0
MAG473	d__Bacteria;p__Cyanobacteriota;c__Cyanobacteriia;o__Cyanobacteriales;f__Nostocaceae;g__Scytonema;s__Unclassified	0	0	0	0	0	0	0	0	0	0	0	0	0.29948	0	0	0	0	0	0	0	0.306154	0.408033	0	0	0	0	0.360812	0
MAG475	d__Archaea;p__Thermoproteota;c__Nitrososphaeria;o__Nitrososphaerales;f__Nitrososphaeraceae;g__Nitrosocosmicus;s__Nitrosocosmicus oleophilus	0.502698	0.195164	0.54524	0.825081	0.838516	0.64362	0.177572	0.182379	0.470942	2.67385	0.840137	0.472134	0.32128	0.898629	1.14003	0.740298	0.32404	0.235351	0.490685	0.580629	0.412172	0.212834	1.03925	0.258406	1.49147	1.0068	0.36773	0.3698
MAG476	d__Bacteria;p__Actinomycetota;c__Actinomycetia;o__Actinomycetales;f__Dermatophilaceae;g__Ornithinicoccus;s__Ornithinicoccus ciconiae	0	0.362995	0	0	0	0	0	0	0	0	0	0	0	0	0	0	0	0	0	0	0	0	0	0	0	0	0	0
MAG49	d__Bacteria;p__Pseudomonadota;c__Gammaproteobacteria;o__Steroidobacterales;f__Steroidobacteraceae;g__SCUD01;s__Unclassified	0	0.506885	0	0	0	0	0	0	0	0	0	0	0	0	0	0	0	0	0	0	0	0	0	0	0	0	0	0
MAG493	d__Bacteria;p__Acidobacteriota;c__Thermoanaerobaculia;o__UBA5704;f__UBA5704;g__Unclassified;s__Unclassified	0	0	0	0	0	0.288156	0	0	0	0.577793	0	0	0	0	4.00517	0.155094	0	0	0	0	0	0	0	0	0	0	0	0
MAG495	d__Bacteria;p__Bacteroidota;c__Bacteroidia;o__Chitinophagales;f__Chitinophagaceae;g__JAEWAC01;s__Unclassified	0	0	0	0	0	0.199663	0	0	0	0	0	0	0	0	0	0	0	0	0	0	0.304517	0.345359	0	0	0	0	0.381523	0
MAG505	d__Bacteria;p__Bacteroidota;c__Bacteroidia;o__Sphingobacteriales;f__Sphingobacteriaceae;g__Sphingobacterium;s__Sphingobacterium sp012030425	0	0	0	0	0	0	12.0692	0	0	0	0	0	0	0	0	0.225488	0.311828	0.729542	0	0	0	0	0	0	0	0	0	0
MAG513	d__Bacteria;p__Bacteroidota;c__Bacteroidia;o__Chitinophagales;f__Chitinophagaceae;g__Flavisolibacter;s__Unclassified	0	0	0	1.01952	0	0	0	0	1.71673	0	0.907964	0	0	0.668743	0	0	0	0	0	0	0	0	0	0	0	0.654483	0	0
MAG518	d__Archaea;p__Thermoproteota;c__Nitrososphaeria;o__Nitrososphaerales;f__Nitrososphaeraceae;g__Nitrosocosmicus;s__Nitrosocosmicus oleophilus	0.319845	0.185496	0.553371	0.849396	0.764719	0.692925	0.227644	0.184371	0.494815	0.634404	0.875717	0.428481	0.299573	0.950079	0.914075	0.720128	0.469374	0.315443	0.496155	0.575107	1.33641	0.225512	0.522381	0.241929	1.47354	1.03771	0.211389	0.0802803
MAG522	d__Bacteria;p__Gemmatimonadota;c__Gemmatimonadetes;o__Gemmatimonadales;f__Gemmatimonadaceae;g__JABFXC01;s__Unclassified	0	0	0	0.401296	0	0	0	0	1.90031	0	0.366935	0	0	0.199059	0	0	0	0	0	0	0	0	0	0	0	0.309879	0	0
MAG524	d__Bacteria;p__Acidobacteriota;c__Blastocatellia;o__Pyrinomonadales;f__Pyrinomonadaceae;g__PSRF01;s__Unclassified	0	0	0	0	0	0.319677	1.94504	0.15975	0	0	0	0	0	0	0.11018	0.16007	0	0	0.149094	0	0.740154	0	0.147291	0	0	0	0	0
MAG527	d__Bacteria;p__Actinomycetota;c__Thermoleophilia;o__Solirubrobacterales;f__70-9;g__Unclassified;s__Unclassified	0	0	0	0	0.274891	0.610864	0.238483	0	0	0	0.21105	0	0.161879	0.188786	0.887132	0.170155	0.420409	0.322032	0	0	0	0.257434	0.119048	0	0	0	0.710118	4.40403
MAG528	d__Bacteria;p__Nitrospirota;c__Nitrospiria;o__Nitrospirales;f__Nitrospiraceae;g__Palsa-1315;s__Unclassified	0	0	0	0	0	0	0	0	0	0	0	0.28806	0	0	0	0	0	0	0	0	0	0	0.179849	0.197373	0.679211	0	0	0
MAG53	d__Bacteria;p__Pseudomonadota;c__Gammaproteobacteria;o__Burkholderiales;f__Burkholderiaceae_A;g__Unclassified;s__Unclassified	0	0	0	1.98455	0	0.237884	0	0	0	0	0.526591	0	0	0.812025	0	0	0.182964	0	0	0	0	0	0	0	0	0.590357	0	0
MAG536	d__Bacteria;p__Pseudomonadota;c__Gammaproteobacteria;o__Pseudomonadales;f__Moraxellaceae;g__Acinetobacter;s__Acinetobacter pseudolwoffii	0	0	0	0	0	0	0	0	0	0	0	0	0	0	0	0	0	0.0726651	0	0	0	0	0	0	0	0	0	0
MAG538	d__Bacteria;p__Pseudomonadota;c__Gammaproteobacteria;o__Xanthomonadales;f__Xanthomonadaceae;g__Pseudoxanthomonas_A;s__Unclassified	0.137834	0.495945	0	0	0	0.239699	0.0578563	0	0	0	0	0	0	0	0.107317	0.111019	4.21074	0.117913	0	0	0.187998	0	0	0	0.204675	0	0	0.0507102
MAG539	d__Bacteria;p__Actinomycetota;c__Actinomycetia;o__Actinomycetales;f__Micrococcaceae;g__Arthrobacter_D;s__Arthrobacter_D subterraneus	0.196842	0.556029	0	0	0	0	0	0	0	0	0	0	0	0	0	0	0	0	0	0	0	0	0	0	0	0	0	0
MAG54	d__Bacteria;p__Actinomycetota;c__Thermoleophilia;o__Gaiellales;f__Gaiellaceae;g__JACCRW01;s__Unclassified	0	0	0	0	0	0	0	0	0.273673	0	0.212497	0	0	0	0	0	0	0	0	0	0	0	0	0	0	0	0	0
MAG546	d__Bacteria;p__Bacteroidota;c__Bacteroidia;o__Chitinophagales;f__Chitinophagaceae;g__Ferruginibacter;s__Unclassified	0	0	0	0	0	0.113526	0	0	0	0	0	0	0	0	0	0	0.139967	0	0	0	0	0	0	0	0	0	0	0
MAG55	d__Bacteria;p__Nitrospirota;c__Nitrospiria;o__Nitrospirales;f__Nitrospiraceae;g__Unclassified;s__Unclassified	0	0	0	0	0.20192	0.16203	0	0.291038	0	0	0	0.194804	0	0	0	0.146358	0	0	0.32871	0.308983	0	0.133694	0.176643	0.135543	0	0	0.119657	0.12552
MAG552	d__Bacteria;p__Bacillota;c__Bacilli;o__Staphylococcales;f__Staphylococcaceae;g__Staphylococcus;s__Staphylococcus equorum	0	0	0	0	0	0	0	0	0	0	0	0	0	0.174274	0	0	0	0	0	0	0	0	0	0	0	0	0	0
MAG555	d__Bacteria;p__Nitrospirota;c__Nitrospiria;o__Nitrospirales;f__Nitrospiraceae;g__Nitrospira_F;s__Unclassified	2.71385	2.92357	0.378893	0	0	2.23374	1.51522	0	0	3.76341	0	0	0.395746	0	0.943642	0.265329	2.73155	3.72576	0	0	2.51057	0	2.58188	0	2.50225	0	0	0
MAG556	d__Bacteria;p__Chloroflexota;c__Anaerolineae;o__Anaerolineales;f__EnvOPS12;g__UBA12294;s__Unclassified	0	0	0.145828	0	0	0	0	0	0	0	0	0	0.56273	0	0	0	0	0	0	0	0	0.752309	0	0	0	0	0	0.776065
MAG560	d__Bacteria;p__Bacteroidota;c__Bacteroidia;o__Chitinophagales;f__Saprospiraceae;g__JADKGY01;s__Unclassified	0	0	0.213775	0	0	0	0	0	0	0	0	0	3.28396	0	0	0.154436	0	0	0	0	0	0	0	0	0	0	0	0
MAG561	d__Bacteria;p__Actinomycetota;c__Actinomycetia;o__Unclassified;f__Unclassified;g__Unclassified;s__Unclassified	0.298624	0.224081	0.22251	0	0.351123	0.203403	0.130885	0.281818	0	0.197065	0.331827	0.146046	0	0.339577	0.26457	0.259947	0.205677	0.137427	0.238244	0.149713	0	0.256912	0	0.0926858	0	0	0.279605	0.184033
MAG565	d__Bacteria;p__Actinomycetota;c__Actinomycetia;o__Actinomycetales;f__Dermatophilaceae;g__Terrabacter;s__Unclassified	0	0	0	0	0	0	0	0	0	0	0	0	0	0.279465	0	0	0	0	0	0	0	0	0	0	0	0	0	0
MAG566	d__Bacteria;p__Chloroflexota;c__Limnocylindria;o__Limnocylindrales;f__CSP1-4;g__SPCO01;s__Unclassified	0	0.317799	0	0	0	0	0	0	0	0	0	0	0	0	0	0	0	0	0	0	0	0	0	0	0	0	0	0
MAG571	d__Bacteria;p__Pseudomonadota;c__Gammaproteobacteria;o__Xanthomonadales;f__Xanthomonadaceae;g__JACMKK01;s__Unclassified	0	0	2.20438	0	2.87225	0	0	0	0	0	0	0	0	0	0	0	0	0	0.233906	0	0	2.94384	0	0	1.24414	0	2.66965	0.231658
MAG572	d__Bacteria;p__Actinomycetota;c__Actinomycetia;o__Actinomycetales;f__Microbacteriaceae;g__Leucobacter;s__Unclassified	0	0.103219	0	0	0	0	0	0	0	0	0	0	0	0	0	0	0	0	0	0	0	0	0	0	0	0	0	0
MAG577	d__Archaea;p__Thermoproteota;c__Nitrososphaeria;o__Nitrososphaerales;f__Nitrososphaeraceae;g__Nitrosocosmicus;s__Nitrosocosmicus oleophilus	0.369568	0.211277	0.694612	0.812299	0.898547	1.22766	0.203033	0.255686	0.488123	0.735087	0.804755	0.507793	0.36924	0.852646	1.08718	0.85103	0.459354	0.287972	0.556778	0.691181	0.486368	0.340682	0.65025	0.276811	1.57147	0.901109	0.332555	0.168926
MAG581	d__Bacteria;p__Gemmatimonadota;c__Gemmatimonadetes;o__Gemmatimonadales;f__Gemmatimonadaceae;g__JABFXC01;s__Unclassified	0	0	0	0.400633	0	0	0	0	1.85424	0	0.366741	0	0	0	0	0	0	0	0	0	0	0	0	0	0	0.312805	0	0
MAG582	d__Archaea;p__Thermoproteota;c__Nitrososphaeria;o__Nitrososphaerales;f__Nitrososphaeraceae;g__TH1177;s__Unclassified	0	0	1.21456	0	0.968754	0.230812	0	0.725309	0	0	0.199439	0.823255	0.217593	0.22068	0.132498	0	0	0	0.544296	1.04068	0	1.92512	0.139679	0.493713	0.20458	0.241785	1.71009	1.3546
MAG599	d__Bacteria;p__Cyanobacteriota;c__Cyanobacteriia;o__Cyanobacteriales;f__Microcoleaceae;g__Microcoleus;s__Unclassified	0	0.0953754	1.15754	0	0.111474	0.767685	1.10702	0.272759	0	0	0.393773	0.192788	1.23192	0.755227	0.0904132	0	0.519346	2.52846	0.181285	0.0916361	3.73257	2.30782	0	0.276871	0	0.270522	2.26021	0.292884
MAG601	d__Bacteria;p__Actinomycetota;c__Thermoleophilia;o__Solirubrobacterales;f__Solirubrobacteraceae;g__Conexibacter;s__Unclassified	0	9.93595	0	0	0	0	0	0	0	0	0	0	0	0	0	0	0	0	0	0	0	0	0	0	0	0	0	0
MAG603	d__Bacteria;p__Cyanobacteriota;c__Cyanobacteriia;o__Cyanobacteriales;f__Microcoleaceae;g__Microcoleus;s__Unclassified	0	0	1.44023	0	0.127088	0.613217	0.305374	0.537561	0	0	0.464577	0.195848	1.49634	0.57383	0	0	0.241155	0.269453	0.154356	0	1.91455	2.68973	0	0.361944	0	0	2.60935	0.317498
MAG604	d__Bacteria;p__Pseudomonadota;c__Alphaproteobacteria;o__Sphingomonadales;f__Sphingomonadaceae;g__Sphingorhabdus_B;s__Unclassified	0	0.131321	0	0	0	0	2.97464	0	0	0	0	0	0	0	0	0	0.465138	1.49409	0	0	0.30393	0	0	0	0	0	0	0
MAG606	d__Bacteria;p__Pseudomonadota;c__Gammaproteobacteria;o__Pseudomonadales;f__Moraxellaceae;g__Psychrobacter;s__Psychrobacter faecalis	0	0	0	0	0	0	0	0	0	0	0	0	0	0	0	0	0	0	0	0	0	0	0	0	0.114716	0	0.0302798	0
MAG614	d__Bacteria;p__Acidobacteriota;c__Blastocatellia;o__RBC074;f__RBC074;g__Unclassified;s__Unclassified	0	0	0	0	0.0881851	0	0	0	0	0	0	0	0.535552	0	0	0	0	0	0	0	0	0.225411	0	0	0	0	0.0551166	2.23824
MAG615	d__Bacteria;p__Actinomycetota;c__Actinomycetia;o__Actinomycetales;f__Dermatophilaceae;g__Ornithinicoccus;s__Ornithinicoccus ciconiae	0	0.486399	0	0	0	0	0	0	0	0	0	0	0	0	0	0	0	0	0	0	0	0	0	0	0	0	0	0
MAG618	d__Bacteria;p__Nitrospirota;c__Nitrospiria;o__Nitrospirales;f__Nitrospiraceae;g__Nitrospira_C;s__Unclassified	0	0	0	0	0.214717	0.190246	0	0.238478	0	0	0	0.16404	0	0	0	0.172562	0	0	0.265662	0.238903	0	0.167231	0.191643	0.124024	0	0	0.148214	0.169459
MAG620	d__Bacteria;p__Actinomycetota;c__Thermoleophilia;o__Gaiellales;f__Gaiellaceae;g__JACCRW01;s__Unclassified	0	0	0	0	0	0	0	0	0.255086	0	0	0	0	0	0	0	0	0	0	0	0	0	0	0	0	0	0	0
MAG624	d__Bacteria;p__Acidobacteriota;c__Blastocatellia;o__Pyrinomonadales;f__Pyrinomonadaceae;g__PSRF01;s__Unclassified	0.29601	0.0955573	0.257889	0	0.292715	0.177496	0.255849	1.90855	0	0.319224	0.345856	0.751857	0	0.229282	0	0	1.13086	0.25974	1.36239	1.34678	2.61692	0	0.606511	0.550504	0	0.296301	0.060911	0.0470882
MAG625	d__Bacteria;p__Actinomycetota;c__Actinomycetia;o__Propionibacteriales;f__Propionibacteriaceae;g__Brevilactibacter;s__Brevilactibacter sinopodophylli	0	0	0	0	0	0	0	0	0	0	0	0.0872332	0	0	0	0	0	0	0	0	0	0	0	0	0	0	0	0
MAG629	d__Bacteria;p__Cyanobacteriota;c__Cyanobacteriia;o__Cyanobacteriales;f__Microcoleaceae;g__Microcoleus;s__Unclassified	0	0.132977	4.21471	0	0.243448	0.837873	0.400951	0.404032	0	0	0.414091	0.237956	1.57724	0.571158	0.126349	0	0.385408	0.370925	0.190239	0	2.41471	4.74392	0	0.414497	0.130571	0.252145	4.05844	0.573314
MAG633	d__Bacteria;p__Pseudomonadota;c__Unclassified;o__Unclassified;f__Unclassified;g__Unclassified;s__Unclassified	0.342526	0.098796	0.188701	0.344628	0.296132	0.233755	0.145469	2.69189	0	0.536503	0.367624	1.96838	0	0.33644	0	0	0.221411	0.186911	2.51832	3.06725	0.398682	0	0.827353	2.26677	0.413555	0.340049	0.131808	0
MAG639	d__Archaea;p__Thermoproteota;c__Nitrososphaeria;o__Nitrososphaerales;f__Nitrososphaeraceae;g__Nitrososphaera;s__Unclassified	0	0	0	0	0	0	0	0	0	0	0	0	0.761526	0	0	0	0	0	0	0	0	0.0772249	0	0	0	0	0	0.171379
MAG647	d__Bacteria;p__Acidobacteriota;c__Blastocatellia;o__Pyrinomonadales;f__Pyrinomonadaceae;g__PSRF01;s__Unclassified	0.210383	0	0.544992	0	0	5.35162	0	0	0	0.175451	0	0	0	0	0.209893	0.246375	0	0.123846	0.163893	0	0	0	0.292306	0.081216	0	0	0	0
MAG649	d__Bacteria;p__Cyanobacteriota;c__Cyanobacteriia;o__Cyanobacteriales;f__Phormidiaceae_A;g__Phormidium_B;s__Unclassified	0	0	0	0	0	0	0	0	0	0	0	0	0.604121	0	0	0	0	0	0	0	0	0	0	0	0	0	0	0
MAG650	d__Bacteria;p__Gemmatimonadota;c__Gemmatimonadetes;o__Gemmatimonadales;f__GWC2-71-9;g__Unclassified;s__Unclassified	0	0	0	0	0.0945047	0.132158	0	0	0	0	0	0	0.469113	0	0	0	0	0	0	0	0	1.15809	0	0.0829665	0	0	0.0558994	3.27345
MAG651	d__Bacteria;p__Pseudomonadota;c__Unclassified;o__Unclassified;f__Unclassified;g__Unclassified;s__Unclassified	0.229202	0	0	0	0.249957	0.176113	0.109132	1.9408	0	0.327978	0.271594	1.77943	0	0	0	0	0.15293	0.0997644	2.60375	2.64221	0.252542	0	0.845331	2.08622	0.213306	0	0.0740394	0
MAG653	d__Bacteria;p__Pseudomonadota;c__Gammaproteobacteria;o__Burkholderiales;f__SG8-39;g__SCGC-AG-212-J23;s__Unclassified	0	0	0	0	0.244228	0.180882	0	2.98493	0	0	0	2.08256	0	0	0	0	0	0	1.93509	2.51898	0	0.0619208	0	1.80261	0	0	0.0609112	0
MAG656	d__Bacteria;p__Acidobacteriota;c__Thermoanaerobaculia;o__UBA5704;f__UBA5704;g__UBA5704;s__Unclassified	0.167666	0.120579	0	0	0	0.2327	0	0	0	0.245117	0	0	0	0	0.241718	0.281226	0	3.39764	0	0	0.355627	0	0.166383	0.0726699	0	0	0	0
MAG658	d__Bacteria;p__Cyanobacteriota;c__Cyanobacteriia;o__Cyanobacteriales;f__Xenococcaceae;g__Waterburya;s__Unclassified	0	0	0	0	0	0	0	0	0	0	0	0	0.208622	0	0	0	0.149413	0.0860682	0	0	0	0	0	0	0	0	0	0
MAG661	d__Bacteria;p__Bacillota;c__Bacilli;o__Exiguobacterales;f__Exiguobacteraceae;g__Exiguobacterium_A;s__Exiguobacterium_A sibiricum	0	0	0	0	0	0	0	0	0	0	0	0	0	0	0	0	0	0	0	0	0	0	0	0	0	0	0	0.154698
MAG664	d__Bacteria;p__Actinomycetota;c__Actinomycetia;o__Actinomycetales;f__Dermatophilaceae;g__F2B08;s__Unclassified	0	0.21306	0	0	0	0.234754	0	0	0	0	0	0	0	0	0.163633	0.301451	0	0	0	0	0	0	0	0	0	0	0.0873952	0
MAG669	d__Bacteria;p__Bacteroidota;c__Bacteroidia;o__Flavobacteriales;f__Flavobacteriaceae;g__Flavobacterium;s__Unclassified	0	0	0	0	0	0	0.231594	0	0	0	0	0	0	0	0	0	1.25337	0.125849	0	0	0	0	0	0	0	0	0	0
MAG670	d__Bacteria;p__Actinomycetota;c__Actinomycetia;o__Actinomycetales;f__Micrococcaceae;g__Arthrobacter;s__Arthrobacter oxydans	1.13709	1.54839	0.267018	0	0.111955	0.268838	0.554119	0	0	0.555143	0	0	0.420776	0	0.402916	0.53091	0	0.24992	0	0	0	0.149476	0.233925	0	0	0	0.241024	0.229085
MAG671	d__Bacteria;p__Acidobacteriota;c__Vicinamibacteria;o__Vicinamibacterales;f__UBA2999;g__12-FULL-67-14b;s__Unclassified	0.128505	0	0.293567	0	0.250939	0.199799	0	0	0	0	0	0	1.14151	0	0	0.269218	0	0	0	0	0	0.107984	0	0	0.119948	0	0.173087	0.0484727
MAG672	d__Bacteria;p__Actinomycetota;c__Acidimicrobiia;o__UBA5794;f__ZC4RG35;g__JACZUI01;s__Unclassified	0	0	0	0	0.379082	0	0	0	0	0	0	0	0	0	0	0	0	0	0	0	0	0.140825	0	0	0	0	0.0999125	0
MAG674	d__Bacteria;p__Actinomycetota;c__Actinomycetia;o__Nanopelagicales;f__CAIYMF01;g__JAFIHG01;s__Unclassified	0	0.535351	0	0.286208	0	0.561983	0	0	0	0	0	0	0	0.25575	0.23931	0.120564	0.129529	0	0	0	0	0	0	0	0.236038	0	0	0
MAG680	d__Bacteria;p__Actinomycetota;c__Actinomycetia;o__Actinomycetales;f__Microbacteriaceae;g__Agromyces_B;s__Unclassified	0	0	0	0	0	0	0	0	0	0	0	0	0	0	0	0.449853	0	0	0	0	0	0	0	0	0	0	0	0
MAG683	d__Bacteria;p__Pseudomonadota;c__Alphaproteobacteria;o__Sphingomonadales;f__Sphingomonadaceae;g__Allosphingosinicella;s__Unclassified	0.283986	0.094665	0	0	0	0	0	0	0	0.172488	0	0	0	0	0	0	0	0	0	0	0	0	0.611705	0	0	0	0	0
MAG686	d__Bacteria;p__Chloroflexota;c__Limnocylindria;o__QHBO01;f__QHBO01;g__JACDBZ01;s__Unclassified	1.17823	0.960242	2.02986	0	3.83269	3.57799	0.392811	0.544577	0	0.872675	0	0.246705	0.68087	0	3.32624	3.0782	0.923523	1.86301	0.346862	0.408334	0.127824	1.97032	0.711028	0.165439	4.40495	0	1.6862	0.837371
MAG687	d__Bacteria;p__Acidobacteriota;c__Vicinamibacteria;o__Vicinamibacterales;f__2-12-FULL-66-21;g__JACCXG01;s__Unclassified	0	0	0.938455	0	0	0	0	0	0	0	0	0	1.43246	0	0	0	0	0	0	0	0	0	0	0	0	0	0	0
MAG688	d__Bacteria;p__Pseudomonadota;c__Alphaproteobacteria;o__Sphingomonadales;f__Sphingomonadaceae;g__Sphingorhabdus_B;s__Unclassified	0	0.130516	0	0	0	0	1.55984	0	0	0	0	0	0	0	0	0	0.397044	1.78927	0	0	0.274742	0	0	0	0	0	0	0
MAG69	d__Bacteria;p__Actinomycetota;c__Thermoleophilia;o__Gaiellales;f__Gaiellaceae;g__GMQP-bins7;s__Unclassified	0.674972	0.374362	0.772022	0	2.19067	0.662923	0.42482	1.81272	0	1.02545	0	0.82321	0	0	0.789306	0.442721	1.51377	1.528	2.1204	2.10218	0.851163	1.80184	1.58991	0.534109	0.615952	0	1.97278	2.23119
MAG690	d__Bacteria;p__Actinomycetota;c__Thermoleophilia;o__Gaiellales;f__Gaiellaceae;g__GMQP-bins7;s__Unclassified	0.752151	0.402623	0.777862	0	1.76078	0.724977	0.45413	1.80836	0	1.0823	0	0.862853	0	0.282601	0.907779	0.507486	2.58416	1.70506	2.24609	2.06012	0.950347	1.43935	1.6113	0.555296	0.635075	0	1.2975	1.76608
MAG691	d__Bacteria;p__Pseudomonadota;c__Gammaproteobacteria;o__Xanthomonadales;f__Xanthomonadaceae;g__Lysobacter;s__Unclassified	0.166438	0.17573	0	0.62412	0.37767	0.143158	0	1.47447	0	0	0.25644	0.275242	0	0.344252	0.132047	0	1.11679	0	1.0577	0.845576	6.65905	0	0.154445	0.228731	0	0.522049	0.183673	0
MAG693	d__Bacteria;p__Actinomycetota;c__Actinomycetia;o__Unclassified;f__Unclassified;g__Unclassified;s__Unclassified	0.385432	0.336873	0	0	0.164159	0.308134	0.227891	0	0	0.23892	0.342768	0	0	0.441501	0.271163	0.312272	0.269528	0.152891	0	0	0	0.0931875	0	0	0.67971	0.335652	0.0925852	0
MAG699	d__Bacteria;p__Pseudomonadota;c__Gammaproteobacteria;o__Burkholderiales;f__Burkholderiaceae;g__Telluria;s__Unclassified	0	0	0	0	0	0	10.3437	0	0	0	0	0	0	0	0	0	0	0.153111	0	0	0	0	0	0	0	0	0	0
MAG701	d__Bacteria;p__Dormibacterota;c__Dormibacteria;o__Dormibacterales;f__Dormibacteraceae;g__CF-161;s__Unclassified	0	0	0	0	0	0	0	0	0	0	0	0	0	0	0	0	0	0	0	0	0	0	0.114335	0	0	0	0	0
MAG705	d__Bacteria;p__Nitrospirota;c__Nitrospiria;o__Nitrospirales;f__Nitrospiraceae;g__Nitrospira_F;s__Unclassified	0	0	0	0	0	0	0	0	0	0	0	0	0.352036	0	0	0	0	0	0	0	0	0	0	0	0	0	0	0
MAG719	d__Bacteria;p__Actinomycetota;c__Thermoleophilia;o__Solirubrobacterales;f__70-9;g__VAYN01;s__Unclassified	0	0	0	0	0	0	0	0	0	0	0	0	0.253653	0	0	0	0	0	0	0	0	0	0	0	0.217125	0	0	0
MAG721	d__Bacteria;p__Armatimonadota;c__Fimbriimonadia;o__Fimbriimonadales;f__Fimbriimonadaceae;g__55-13;s__55-13 sp023423495	0.239195	0.190088	0.554269	0	0.084628	0.197964	0.0570057	0	0	0	0	0	1.2796	0	0.206907	0.413891	0.166411	0.259759	0	0	0	0	0	0	0	0	0	0
MAG726	d__Bacteria;p__Chloroflexota;c__Anaerolineae;o__Anaerolineales;f__EnvOPS12;g__UBA12294;s__Unclassified	0	0	0	0	0	0	0	0	0	0	0	0	0.283916	0	0	0	0	0	0	0	0	0.477457	0	0	0	0	0	2.79351
MAG728	d__Bacteria;p__Desulfobacterota_B;c__Binatia;o__UBA9968;f__UBA9968;g__DP-20;s__Unclassified	0.370972	0	0.219134	1.20582	0.201629	0.531098	1.83038	0.487535	0.305057	1.49253	0.733507	0.442493	0.162638	0.462875	0.549373	0.867648	1.57229	1.10277	1.13045	0.647132	2.38889	0.111735	0.609979	0.253269	0	0.613525	0.166907	0.317816
MAG73	d__Bacteria;p__Actinomycetota;c__Actinomycetia;o__Actinomycetales;f__Micrococcaceae;g__Arthrobacter;s__Arthrobacter luteus_A	1.24614	1.34561	0.186044	0	0.136263	1.39332	2.27014	0	0	1.21225	0	0	0.492743	0	2.88341	1.39907	0.139264	0.367179	0	0	0	0	1.07766	0	0	0	0.0579032	0.0567378
MAG733	d__Bacteria;p__Chloroflexota;c__Limnocylindria;o__QHBO01;f__QHBO01;g__JACDBZ01;s__Unclassified	0	0	0	0	0	0	0	0	0	0	0	0	0	0	0.195799	0	0.0806663	0	0	0	0	0	0	0	1.28347	0	0	0
MAG737	d__Bacteria;p__Desulfobacterota_B;c__Binatia;o__UBA9968;f__UBA9968;g__WHTF01;s__Unclassified	0.577098	0.209799	0.790171	0	0.90955	0.829147	0.14689	1.09073	0	0.93275	0.204878	0.445726	0.736517	0.197058	0.368344	0.522431	0.236906	0.372839	1.6906	1.41296	0.162099	1.03653	0.823643	0.279825	0	0	0.825617	2.07523
MAG738	d__Bacteria;p__Bacteroidota;c__Bacteroidia;o__Sphingobacteriales;f__Sphingobacteriaceae;g__Arcticibacter;s__Arcticibacter pallidicorallinus	0	0	0	0	0	0	0	0	0	0	0	0	0	0	0	0	0.207902	0	0	0	0	0	0	0	0	0	0	0
MAG739	d__Bacteria;p__Pseudomonadota;c__Gammaproteobacteria;o__Burkholderiales;f__SG8-39;g__SCGC-AG-212-J23;s__Unclassified	0	0	0	0	0.227445	0.163399	0	2.75355	0	0	0	1.87112	0	0	0	0	0	0	1.81944	2.8595	0	0.055432	0	1.28308	0	0	0.0501148	0
MAG740	d__Bacteria;p__Pseudomonadota;c__Alphaproteobacteria;o__Sphingomonadales;f__Sphingomonadaceae;g__Sphingomicrobium;s__Unclassified	1.21473	0.895732	2.13295	0.508401	2.79504	2.03918	0.130285	0.872548	0	0.780662	0.622026	1.13395	0.623644	0.761587	1.12945	0.704054	1.05327	0.13081	1.52751	0.83763	0.354995	0.412847	0.38473	0.618011	3.07183	0.613972	3.11963	0.0770751
MAG743	d__Bacteria;p__Actinomycetota;c__Thermoleophilia;o__Solirubrobacterales;f__70-9;g__Unclassified;s__Unclassified	0	0	0	0	0	0	0	0	0	0	0	0	0	0	0	0	0	0	0	0	0	0	0	0	0	0	0.0510826	0
MAG744	d__Bacteria;p__Actinomycetota;c__Actinomycetia;o__Actinomycetales;f__Micrococcaceae;g__Arthrobacter;s__Unclassified	0	0	0	0	0	0	0.585016	0	0	0	0.243639	0	0	0.213741	0.274019	0	0	0.125258	0	0	0	0	0	0	0	0	0	0
MAG75	d__Bacteria;p__Desulfobacterota_B;c__Binatia;o__UBA9968;f__UBA9968;g__DP-20;s__Unclassified	0.431075	0	0.225307	1.28217	0.215532	0.563656	1.2164	0.532559	0.320787	1.66586	0.774448	0.471147	0.177687	0.497742	0.58269	0.906333	1.69995	1.15916	1.19213	0.710557	3.63243	0.123429	0.666304	0.274604	0	0.650281	0.181869	0.336211
MAG750	d__Bacteria;p__Bacillota;c__Bacilli;o__Bacillales;f__Bacillaceae_H;g__Priestia;s__Priestia megaterium	0.25535	0.296739	0	0	0	0	0	0.117427	0	0.247385	0	0.112557	0	0	0.0996038	0	0	0	0	0.0881423	0	0.194648	0.186955	0.117336	0	0	0.239262	0.240216
MAG756	d__Bacteria;p__Gemmatimonadota;c__Gemmatimonadetes;o__Gemmatimonadales;f__Gemmatimonadaceae;g__JABFXC01;s__Unclassified	0	0	0	0.389417	0	0	0	0	1.65637	0	0.338435	0	0	0	0	0	0	0	0	0	0	0	0	0	0	0.29714	0	0
MAG757	d__Bacteria;p__Chloroflexota;c__Limnocylindria;o__Limnocylindrales;f__CSP1-4;g__SPCO01;s__Unclassified	0	0	0	0	0	0	0	0	0	0	0	0	0	0	0.127096	0.132535	0	0	0	0	0	0	0	0	0	0	0	0
MAG758	d__Bacteria;p__Bacteroidota;c__Bacteroidia;o__Flavobacteriales;f__Weeksellaceae;g__MFBS3-17;s__Unclassified	0	0.574266	0	0	0	0	0	0	0	0	0	0	0	0	0	0	0	0	0	0	0	0	0	0	0	0	0	0
MAG76	d__Bacteria;p__Pseudomonadota;c__Gammaproteobacteria;o__Pseudomonadales;f__Pseudomonadaceae;g__Pseudomonas_E;s__Unclassified	0	0	0	0	0	0	9.66995	0	0	0	0	0	0	0	0	0	0	0	0	0	0	0	0	0	0	0	0	0
MAG761	d__Bacteria;p__Actinomycetota;c__Actinomycetia;o__Actinomycetales;f__Cellulomonadaceae;g__Cellulosimicrobium;s__Cellulosimicrobium funkei	0	0.122177	0	0	0	0.162107	0	0	0	0	0	0	0	0	0	0	0	0	0	0	0	0	0	0	0	0	0	0.148896
MAG762	d__Bacteria;p__Actinomycetota;c__Actinomycetia;o__Propionibacteriales;f__Nocardioidaceae;g__Nocardioides;s__Unclassified	4.19912	3.14808	0.515158	2.29928	0.48457	1.48912	0.402484	0.62443	0.891391	2.49578	4.93152	0.427707	0.520313	5.41344	3.05246	2.53819	0.838041	0.912752	0.430521	0.253693	1.04416	0.234509	0.736371	0.283302	2.26437	6.09662	0.228747	0.111567
MAG763	d__Bacteria;p__Gemmatimonadota;c__Gemmatimonadetes;o__Gemmatimonadales;f__Gemmatimonadaceae;g__JABFXC01;s__Unclassified	0	0	0	0.363631	0	0	0	0	1.74086	0	0.333672	0	0	0	0	0	0	0	0	0	0	0	0	0	0	0.276559	0	0
MAG768	d__Bacteria;p__Actinomycetota;c__Thermoleophilia;o__Gaiellales;f__Gaiellaceae;g__JACCRW01;s__Unclassified	0	0	0	0	0	0	0	0	0.226978	0	0	0	0	0	0	0	0	0	0	0	0	0	0	0	0	0	0	0
MAG770	d__Bacteria;p__Pseudomonadota;c__Alphaproteobacteria;o__Rhodobacterales;f__Rhodobacteraceae;g__Paracoccus;s__Unclassified	0	0	0	0	0	0	0.16992	0	0	0	0	0	0	0	0	0	0.5412	0.152624	0	0	0	0	0	0	0	0	0	0
MAG773	d__Archaea;p__Thermoproteota;c__Nitrososphaeria;o__Nitrososphaerales;f__Nitrososphaeraceae;g__Nitrosocosmicus;s__Nitrosocosmicus oleophilus	0.424925	0.193146	0.523577	0.90429	0.719682	0.72671	0.20397	0.271305	0.645958	1.10066	0.83927	0.463951	0.263865	0.915176	1.12113	0.805209	0.413855	0.266106	0.515745	0.636634	0.493773	0.197328	1.44556	0.249076	1.32422	0.994126	0.296172	0.283295
MAG776	d__Bacteria;p__Fibrobacterota;c__Fibrobacteria;o__UBA11236;f__UBA11236;g__Chersky-265;s__Unclassified	0	0	0	0	0.139253	0	0	0	0	0	0	0	0	0	0	0	0	0	0	0	0	0	0	0	0	0	1.25006	0
MAG781	d__Bacteria;p__Pseudomonadota;c__Gammaproteobacteria;o__Pseudomonadales;f__Moraxellaceae;g__Acinetobacter;s__Acinetobacter harbinensis	0	0	0	0	0	0	0	0	0	0	0	0	0	0	0	0	0	0	0	0	0	0.151266	0	0	0	0	0	0
MAG782	d__Bacteria;p__Chloroflexota;c__Limnocylindria;o__QHBO01;f__QHBO01;g__JACDBZ01;s__Unclassified	0.237709	0.133359	0.340657	0	0	0.195668	0.084156	0	0	0	0.233575	0	1.39676	0	0	0.2362	0	0.102662	0	0	0	0.0644144	0	0	0	0	0	0.147666
MAG785	d__Bacteria;p__Actinomycetota;c__Actinomycetia;o__Propionibacteriales;f__Propionibacteriaceae;g__Arachnia;s__Unclassified	0	0.105625	0	0	0	0	0.0564894	0	0	0	0	0	0	0	0	0	0	0	0	0	0	0	0	0	0	0	0	0
MAG788	d__Bacteria;p__Pseudomonadota;c__Gammaproteobacteria;o__Burkholderiales;f__Burkholderiaceae_B;g__Rubrivivax_A;s__Unclassified	0.30102	0.150146	2.83264	0	2.0611	0.399959	0.190929	0.912191	0	0.204171	0.312505	0.442937	0	0.309909	0.0995706	0.20798	0.309605	0.122096	0.876129	1.12912	0.12967	0.581138	0.123314	0.419186	1.31348	0	1.52049	0.122487
MAG793	d__Archaea;p__Thermoproteota;c__Nitrososphaeria;o__Nitrososphaerales;f__Nitrososphaeraceae;g__Nitrosocosmicus;s__Nitrosocosmicus oleophilus	0.379053	0.214547	0.503799	0.840122	0.70265	0.861109	0.208247	0.163035	0.532998	0.774091	0.723093	0.436568	0.26767	0.825494	1.32794	0.919827	0.516283	0.314468	0.481056	0.577777	0.523857	0.161708	0.687216	0.229518	1.47278	0.903546	0.129266	0.0645865
MAG798	d__Bacteria;p__Nitrospirota;c__Nitrospiria;o__Nitrospirales;f__Nitrospiraceae;g__Unclassified;s__Unclassified	0.168422	0	0	0	0.153189	0.262283	0	0.200342	0	0.205225	0	0.196596	0	0	0.150065	0.253434	0	0	0.223892	0.211742	0	0.112808	0.240666	0.130674	0	0	0.0872922	0.113778
MAG799	d__Bacteria;p__Pseudomonadota;c__Alphaproteobacteria;o__Rhizobiales;f__Xanthobacteraceae;g__PALSA-894;s__Unclassified	0	0	0	0	0.256607	0	0	0.228435	0	0	0	0.0895429	0	0	0	0	0	0	0.190563	0.282476	0	1.99267	0	0.0952587	0	0	0.561591	4.57
MAG8	d__Bacteria;p__Cyanobacteriota;c__Cyanobacteriia;o__Cyanobacteriales;f__Microcoleaceae;g__Microcoleus;s__Unclassified	0	0	0.892003	0	0.100874	0.461286	0.268911	0.242083	0	0	0.274413	0.127259	5.27056	0.362788	0.133877	0	0.312671	0.287271	0.10545	0	1.63247	1.48467	0	0.309734	0	0	2.22165	0.227773
MAG802	d__Bacteria;p__Actinomycetota;c__Actinomycetia;o__Actinomycetales;f__Micrococcaceae;g__Arthrobacter;s__Arthrobacter equi	0.539662	0.3881	0	0	0	0	0.241011	0	0	0	0.513914	0	0	0.564405	0.159455	0.122608	0.242185	0.142536	0	0	0	0	0.125404	0	0	0.255502	0.0405667	0
MAG803	d__Bacteria;p__Nitrospirota;c__Nitrospiria;o__Nitrospirales;f__Nitrospiraceae;g__Nitrospira_F;s__Unclassified	0.234576	0.214212	0	0	0	0.380965	0	0	0	0.162626	0	0.126739	0	0	0	0.417236	0	0	0	0	0	0	0.295958	0.0736587	0.609536	0	0	0
MAG805	d__Bacteria;p__Actinomycetota;c__Actinomycetia;o__Actinomycetales;f__Microbacteriaceae;g__Agromyces;s__Unclassified	0	0	0	0	0	0	0.164766	0	0	0	0	0	0	0	0	0	0.863508	0.361964	0	0	0.226437	0	0.117422	0	0	0	0	0
MAG812	d__Bacteria;p__Pseudomonadota;c__Gammaproteobacteria;o__Burkholderiales;f__Nitrosomonadaceae;g__Nitrosospira;s__Nitrosospira multiformis_D	1.10277	0.485863	0	0.769921	0.0810389	0.227862	2.1971	0	0	1.31421	0.708207	0.405883	0	0.783362	0.0911321	0	1.18411	0.47195	0	0.193032	2.74692	0	2.73456	0.12413	1.21442	1.00047	0	0
MAG816	d__Bacteria;p__Bacteroidota;c__Bacteroidia;o__Chitinophagales;f__Chitinophagaceae;g__Ferruginibacter;s__Unclassified	0	0	0	0	0	0	0	0	0	0	0	0	0	0	0	0	0.0848681	0	0	0	0	0	0	0	0	0	0	0
MAG82	d__Bacteria;p__Actinomycetota;c__Actinomycetia;o__Actinomycetales;f__Micrococcaceae;g__Arthrobacter;s__Arthrobacter oxydans	0.990718	1.37677	0.239586	0	0.104107	0.19362	0.442292	0	0	0.454397	0	0	0.391644	0	0.338045	0.481273	0	0.217339	0	0	0	0.125476	0.180282	0	0	0	0.194402	0.214893
MAG830	d__Bacteria;p__Acidobacteriota;c__Thermoanaerobaculia;o__Gp7-AA8;f__Gp7-AA8;g__QHVT01;s__Unclassified	0	0	0	0	0	0	0	0	0	0	0	0	0	0	0	0	0	0	0	0	0	0	0	0	0	0	0	2.94867
MAG831	d__Bacteria;p__Bacteroidota;c__Bacteroidia;o__Chitinophagales;f__Chitinophagaceae;g__VBAS01;s__Unclassified	0	0	0	15.8185	0	0	0	0	0.973713	0.182637	4.37998	0	0	6.04537	0	0	0.194645	0	0	0.117021	0.267245	0	0.118187	0	0	8.94973	0	0
MAG84	d__Archaea;p__Thermoproteota;c__Nitrososphaeria;o__Nitrososphaerales;f__Nitrososphaeraceae;g__Nitrosocosmicus;s__Nitrosocosmicus oleophilus	0.301601	0.160724	0.366946	0.694538	0.443086	0.712267	0.166881	0.114131	0.431255	0.622187	0.570141	0.315707	0.197565	0.625502	0.941975	0.779294	0.433232	0.243295	0.333055	0.383914	0.430202	0.111909	0.569353	0.159065	1.03222	0.665341	0.0796182	0
MAG840	d__Bacteria;p__Dormibacterota;c__Dormibacteria;o__Dormibacterales;f__Dormibacteraceae;g__CF-161;s__Unclassified	0	0	0	0	0	0	0	0	0	0	0	0	0	0	0	0	0	0	0	0	0	0	0.114289	0	0	0	0	0
MAG845	d__Bacteria;p__Actinomycetota;c__Actinomycetia;o__Actinomycetales;f__Micrococcaceae;g__Arthrobacter;s__Arthrobacter oxydans	1.22547	1.70361	0.285931	0	0.117342	0.244873	0.559367	0	0	0.565109	0	0	0.464616	0	0.414635	0.587168	0	0.266353	0	0	0	0.153231	0.212118	0	0	0	0.237949	0.268973
MAG847	d__Bacteria;p__Gemmatimonadota;c__Gemmatimonadetes;o__Longimicrobiales;f__Longimicrobiaceae;g__Longimicrobium;s__Unclassified	0	0	0	0	0	0	0	0	0	0	0	0	0	0	0	0	0	0	0	0	0	0	0	0	0	0	0	0.10465
MAG849	d__Bacteria;p__Chloroflexota;c__Anaerolineae;o__Anaerolineales;f__EnvOPS12;g__UBA12294;s__Unclassified	0	0	0.140108	0	0	0	0	0	0	0	0	0	0.529477	0	0	0	0	0	0	0	0	0.78039	0.105297	0	0	0	0	0.81394
MAG855	d__Bacteria;p__Actinomycetota;c__Thermoleophilia;o__Gaiellales;f__Gaiellaceae;g__VAXT01;s__Unclassified	0	0	1.22057	0	6.55211	0	0	0.194163	0	0	0	0	0.263755	0	0	0	0	0.0786014	0.470818	0.551678	0	3.82281	0	0	0	0	4.41113	3.17051
MAG858	d__Bacteria;p__Cyanobacteriota;c__Cyanobacteriia;o__Cyanobacteriales;f__Chroococcidiopsidaceae;g__Chroococcidiopsis;s__Unclassified	0	0	0	0	0.0900316	0.114189	0	0	0	0	0	0	7.39758	0	0.111908	0	0	0	0	0	0	0.186553	0	0	0	0	0.163858	0.0769537
MAG861	d__Bacteria;p__Tectomicrobia;c__Entotheonellia;o__Entotheonellales;f__Entotheonellaceae;g__SXND01;s__Unclassified	0.237483	0	0.152981	0.439069	0.579415	0.260059	0.242251	1.87982	0	0.739511	0.213688	0.760296	0	0.287089	0.233413	0	0.635325	0.294066	3.30918	2.03495	0.978535	0	0.617152	0.531209	0.385493	0.378138	0.0750476	0
MAG87	d__Bacteria;p__Cyanobacteriota;c__Cyanobacteriia;o__Cyanobacteriales;f__Xenococcaceae;g__Waterburya;s__Unclassified	0	0	0	0	0	0	0	0	0	0	0	0	0.196084	0	0	0	0.177681	0.0960262	0	0	0	0	0	0	0	0	0	0
MAG871	d__Bacteria;p__Actinomycetota;c__Thermoleophilia;o__Solirubrobacterales;f__70-9;g__RHKX01;s__Unclassified	0	0	0	0	0	0	0	0.114926	0	0	0	0	0	0	0	0	0.104988	0	0.105579	0	0	0	0.129315	0	0.1539	0	0	0
MAG875	d__Bacteria;p__Actinomycetota;c__Thermoleophilia;o__Gaiellales;f__Gaiellaceae;g__JACCRW01;s__Unclassified	0	0	0	0	0	0	0	0	0.228082	0	0	0	0	0	0	0	0	0	0	0	0	0	0	0	0	0	0	0
MAG879	d__Bacteria;p__Acidobacteriota;c__Vicinamibacteria;o__Vicinamibacterales;f__2-12-FULL-66-21;g__2-12-FULL-66-21;s__Unclassified	0	0	0	0	0	0	0	0	0.349484	0	0	0	0	0	0	0	0	0	0	0	0	0	0	0	0	0	0	0
MAG883	d__Bacteria;p__Actinomycetota;c__Thermoleophilia;o__Solirubrobacterales;f__70-9;g__VAYN01;s__Unclassified	0	0	0	0	0	0	0	0	0	0	0	0	0	0	0	0	0	0	0	0	0	0	0	0	0.231387	0	0	0
MAG884	d__Bacteria;p__Pseudomonadota;c__Gammaproteobacteria;o__Pseudomonadales;f__Moraxellaceae;g__Acinetobacter;s__Unclassified	0	0	0	0	0	0	0.395066	0	0	0	0	0	0	0	0	0	0.366742	8.6652	0	0	0	0	0	0	0	0	0	0
MAG889	d__Bacteria;p__Pseudomonadota;c__Alphaproteobacteria;o__Sphingomonadales;f__Sphingomonadaceae;g__Sphingomicrobium;s__Unclassified	0	0	0	0	0	0	0	0	0	0	0	0	0	0	0	0	0	0	0	0	0	0.529355	0	0	0	0	0.136368	3.83668
MAG891	d__Bacteria;p__Myxococcota;c__Myxococcia;o__Myxococcales;f__Anaeromyxobacteraceae;g__Anaeromyxobacter;s__Unclassified	0	0	0	0	0.130634	0	0	0	0	0	0	0	0	0	0	0	0	0	0	0	0	1.17822	0	0	0	0	0.0539502	3.51052
MAG892	d__Bacteria;p__Bacteroidota;c__Bacteroidia;o__Flavobacteriales;f__Flavobacteriaceae;g__Flavobacterium;s__Unclassified	0	0	0	0	0	0	0.223163	0	0	0	0	0	0	0	0	0	1.06157	0.136818	0	0	0	0	0	0	0	0	0	0
MAG893	d__Bacteria;p__Nitrospirota;c__Nitrospiria;o__Nitrospirales;f__Nitrospiraceae;g__Nitrospira_F;s__Unclassified	0.873437	0.283433	0	0.401505	0.466476	0.861766	0.275246	0.798922	0	1.70709	0.264092	3.17549	0.17292	0	0.187116	0.227103	0.226729	0.38553	0.400758	1.14198	0.318932	0	0.76783	1.50418	1.91129	0.357704	0	0
MAG897	d__Bacteria;p__Actinomycetota;c__Thermoleophilia;o__Gaiellales;f__Gaiellaceae;g__JACCRW01;s__Unclassified	0	0	0	0	0	0	0	0	0.288885	0	0.210722	0	0	0	0	0	0	0	0	0	0	0	0	0	0	0	0	0
MAG913	d__Bacteria;p__Pseudomonadota;c__Alphaproteobacteria;o__Rhodobacterales;f__Rhodobacteraceae;g__Amaricoccus;s__Unclassified	0	0	0	0	0	0.115984	0	0	0	0	0	0	0	0	0	0.204564	0	0	0	0	0	0	0	0	0	0	0	0
MAG92	d__Bacteria;p__Actinomycetota;c__Actinomycetia;o__Actinomycetales;f__Micrococcaceae;g__Glutamicibacter;s__Glutamicibacter protophormiae	0	0	0	0	0	0	0	0	0	0	0	0	0	0	0	0	0.261233	0.0757372	0	0	0	0	0	0	0	0	0	0
MAG929	d__Bacteria;p__Cyanobacteriota;c__Cyanobacteriia;o__Cyanobacteriales;f__Chroococcidiopsidaceae;g__Chroococcidiopsis;s__Chroococcidiopsis thermalis	0	0	0	0	0	0	0	0	0	0	0	0	0.873778	0	0	0	0	0	0	0	0	0	0	0	0	0	0	0
MAG934	d__Bacteria;p__Pseudomonadota;c__Alphaproteobacteria;o__Rhizobiales;f__Xanthobacteraceae;g__PALSA-894;s__Unclassified	0	0	0	0	0.288749	0	0	0.254344	0	0	0	0.0973732	0	0	0	0	0	0	0.186708	0.329107	0	1.72953	0	0.10732	0	0	0.615862	5.61358
MAG936	d__Bacteria;p__Acidobacteriota;c__Blastocatellia;o__Pyrinomonadales;f__Pyrinomonadaceae;g__PSRF01;s__Unclassified	0.367087	0.10554	0.316679	0.261759	0.38254	0.201885	0.281138	3.54155	0	0.344476	0.411455	1.0064	0	0.269276	0	0	1.35788	0.279365	1.69823	1.76336	1.97097	0.0664261	0.767484	0.725447	0	0.346309	0.0795975	0.0625267
MAG940	d__Bacteria;p__Actinomycetota;c__Actinomycetia;o__Unclassified;f__Unclassified;g__Unclassified;s__Unclassified	0.710162	0.374449	0.790156	0.801151	0.990744	0.924903	0.310379	3.15276	0.530466	0.626713	1.21936	0.875124	0.446511	1.17603	1.1779	0.824517	0.869054	0.528731	1.65254	1.25954	0.41855	0.569587	0.43641	0.630073	0.516198	0.961049	0.595469	0.29423
MAG948	d__Bacteria;p__Pseudomonadota;c__Gammaproteobacteria;o__Burkholderiales;f__Nitrosomonadaceae;g__Nitrosospira;s__Unclassified	0.629281	0.693299	0	0	0	0	0.284381	0	0	0.542454	0	0	0	0	0	0	0	0	0	0	0	0	7.54891	0	0	0	0	0
MAG952	d__Bacteria;p__Pseudomonadota;c__Alphaproteobacteria;o__Rhodobacterales;f__Rhodobacteraceae;g__Paracoccus;s__Paracoccus sp021491915	0.258414	0.524011	0.275288	0	0.113104	0.361073	0.144103	0	0	0	0	0	0.548544	0	0.37928	0.625702	0.318481	0.192727	0	0	0	0.0847031	0	0	0.241087	0	0.259228	0.0942102
MAG954	d__Bacteria;p__Nitrospirota;c__Nitrospiria;o__Nitrospirales;f__Nitrospiraceae;g__Nitrospira_F;s__Unclassified	0	0	0	0	0	0	0	0.233496	0	0	0	0.612476	0	0	0	0	0	0	0	0	0	0	0	0.330733	0	0	0	0
MAG959	d__Bacteria;p__Pseudomonadota;c__Gammaproteobacteria;o__Burkholderiales;f__Usitatibacteraceae;g__Usitatibacter;s__Unclassified	0	0	0	0	0	0	0	0	0.29268	0	0.24363	0	0	0	0	0	0	0	0	0	0	0	0	0	0	0	0	0
MAG961	d__Bacteria;p__Pseudomonadota;c__Gammaproteobacteria;o__Burkholderiales;f__SG8-39;g__SCGC-AG-212-J23;s__Unclassified	0	0	0	0	0.189996	0.15706	0	2.73474	0	0	0	2.28929	0	0	0	0	0	0	1.6592	2.24223	0	0.0487746	0	1.29658	0	0	0.042036	0
MAG962	d__Bacteria;p__Pseudomonadota;c__Alphaproteobacteria;o__Rhizobiales;f__Xanthobacteraceae;g__VAZQ01;s__Unclassified	0	0	0.147194	5.14774	0.175341	0.208367	0.374008	0.162049	13.5391	0	5.14352	0.233891	0	4.17538	0.295126	0.115498	0.212043	0.292972	0.316664	0.23686	0.463417	0.210177	0.273763	0.122187	0	4.12872	0.127508	1.21125
MAG971	d__Bacteria;p__Pseudomonadota;c__Alphaproteobacteria;o__Rhodobacterales;f__Rhodobacteraceae;g__Paracoccus;s__Paracoccus sp021491915	0.201975	0.416586	0.216461	0	0.0851004	0.329475	0.164706	0	0	0	0	0	0.483418	0	0.331815	0.550647	0.373994	0.217783	0	0	0	0.0782538	0	0	0.19313	0	0.207398	0.0920944
MAG972	d__Bacteria;p__Actinomycetota;c__Actinomycetia;o__Mycobacteriales;f__Micromonosporaceae;g__Unclassified;s__Unclassified	0	0.201015	0.482679	0	0.876093	0.254564	0.25253	0.151165	0	0	0	0.12271	0.553343	0	0.161751	0.255835	0.158384	0.130819	0.836918	0.416451	0	1.15489	0.239711	0.097062	0.321364	0	1.09713	0.901681
MAG977	d__Bacteria;p__Actinomycetota;c__Thermoleophilia;o__Solirubrobacterales;f__70-9;g__VAYN01;s__Unclassified	0	0	0	0	0	4.79073	0	0	0	0	0	0	0	0	3.14959	0	0.275438	0	0	0	0	0	0	0	0.387944	0	0	0
MAG978	d__Archaea;p__Thermoproteota;c__Nitrososphaeria;o__Nitrososphaerales;f__Nitrososphaeraceae;g__TA-21;s__Unclassified	0.256417	0	0.252571	0	0.29796	0.140189	0	0	0	1.35322	0	0	0.811478	0	0.592477	0.161039	0	0	0	0	0	1.4772	0.592349	0	0	0	2.16004	1.5061
MAG980	d__Bacteria;p__Gemmatimonadota;c__Gemmatimonadetes;o__Gemmatimonadales;f__Gemmatimonadaceae;g__JABFXC01;s__Unclassified	0	0	0	0.364776	0	0	0	0	1.62833	0	0.318963	0	0	0	0	0	0	0	0	0	0	0	0	0	0	0.282754	0	0
MAG983	d__Bacteria;p__Bacteroidota;c__Bacteroidia;o__Chitinophagales;f__Chitinophagaceae;g__Ferruginibacter;s__Unclassified	0.15542	0.116751	4.62286	0	1.83726	0.120837	0	0	0	0	0	0.117805	0	0	0.115311	0.142614	0	0	0.19627	0.0887759	0	1.12299	0	0.143218	0.226207	0	2.11011	0.0654283
MAG986	d__Bacteria;p__Gemmatimonadota;c__Gemmatimonadetes;o__Gemmatimonadales;f__Gemmatimonadaceae;g__JABFXC01;s__Unclassified	0	0	0	0.278445	0	0	0	0	1.09817	0	0.240827	0	0	0	0	0	0	0	0	0	0	0	0	0	0	0	0	0
MAG987	d__Archaea;p__Thermoproteota;c__Nitrososphaeria;o__Nitrososphaerales;f__Nitrososphaeraceae;g__TH1177;s__Unclassified	0	0	1.26518	0	0.852536	0.146225	0	0.736731	0	0	0.234508	0.931701	0	0.235433	0	0	0	0	0.645838	1.15906	0	1.72956	0	0.549973	0	0.272358	1.57757	1.28562
MAG988	d__Bacteria;p__Actinomycetota;c__Acidimicrobiia;o__Acidimicrobiales;f__Ilumatobacteraceae;g__Ilumatobacter;s__Unclassified	0	0	0	0	0	0	0	0	0	0	0	0	0.755695	0	0	0.10906	0	0	0	0	0	0.0583967	0	0	0	0	0	0.0967297
MAG989	d__Bacteria;p__Pseudomonadota;c__Gammaproteobacteria;o__Burkholderiales;f__Burkholderiaceae;g__Pseudoduganella;s__Unclassified	0	0	0	0	0	0	7.02245	0	0	0	0	0	0	0	0	0	0	0.108222	0	0	0	0	0	0	0	0	0	0
MAG990	d__Bacteria;p__Nitrospirota;c__Nitrospiria;o__Nitrospirales;f__Nitrospiraceae;g__Nitrospira_F;s__Unclassified	0.391517	0.28628	0	0	0	0.680852	0	0	0	0.249073	0	0.204836	0.286645	0	0	0.746433	0.100634	0.0748511	0	0	0	0	0.448847	0.111088	0.720896	0	0	0
MAG995	d__Bacteria;p__Chloroflexota;c__UBA6077;o__UBA6077;f__JADZDV01;g__Unclassified;s__Unclassified	0	0	0	0	0	0	0	0	0	0	0	0	0.285277	0	0	0	0	0	0	0	0	0.570949	0	0	0	0	0.742213	1.98287
MAG996	d__Bacteria;p__Acidobacteriota;c__Vicinamibacteria;o__Vicinamibacterales;f__2-12-FULL-66-21;g__JACCXG01;s__Unclassified	0	0	0	0	0.0942962	0	0	0	0	0	0	0	0	0	0	0	0	0	0	0	0	1.09458	0	0	0	0	0.108521	4.88554
