# Supplementary material for: Insights into antibiotic resistomes from metagenome-assembled genomes and gene catalogs of soil microbiota across environments
Source: PeerJ. 2025 Nov 19;13:e20348. doi: 10.7717/peerj.20348 (PMC12640132; doi:10.7717/peerj.20348)
Supplement: Supplemental Information 13 [file peerj-13-20348-s013.xlsx]

## Sheet: Statistical table of COG
Table S8: Statistical table of COG annotation results.
Genome	Taxonomy	Category	Type	Function Description	Gene No.
MAG100	d__Bacteria;p__Bacteroidota;c__Bacteroidia;o__AKYH767;f__2-12-FULL-35-15;g__2-12-FULL-35-15;s__Unclassified	CELLULAR PROCESSES AND SIGNALING	D	Cell cycle control, cell division, chromosome partitioning	49
MAG100	d__Bacteria;p__Bacteroidota;c__Bacteroidia;o__AKYH767;f__2-12-FULL-35-15;g__2-12-FULL-35-15;s__Unclassified	CELLULAR PROCESSES AND SIGNALING	M	Cell wall/membrane/envelope biogenesis	287
MAG100	d__Bacteria;p__Bacteroidota;c__Bacteroidia;o__AKYH767;f__2-12-FULL-35-15;g__2-12-FULL-35-15;s__Unclassified	CELLULAR PROCESSES AND SIGNALING	N	Cell motility	17
MAG100	d__Bacteria;p__Bacteroidota;c__Bacteroidia;o__AKYH767;f__2-12-FULL-35-15;g__2-12-FULL-35-15;s__Unclassified	CELLULAR PROCESSES AND SIGNALING	O	Posttranslational modification, protein turnover, chaperones	138
MAG100	d__Bacteria;p__Bacteroidota;c__Bacteroidia;o__AKYH767;f__2-12-FULL-35-15;g__2-12-FULL-35-15;s__Unclassified	CELLULAR PROCESSES AND SIGNALING	T	Signal transduction mechanisms	111
MAG100	d__Bacteria;p__Bacteroidota;c__Bacteroidia;o__AKYH767;f__2-12-FULL-35-15;g__2-12-FULL-35-15;s__Unclassified	CELLULAR PROCESSES AND SIGNALING	U	Intracellular trafficking, secretion, and vesicular transport	40
MAG100	d__Bacteria;p__Bacteroidota;c__Bacteroidia;o__AKYH767;f__2-12-FULL-35-15;g__2-12-FULL-35-15;s__Unclassified	CELLULAR PROCESSES AND SIGNALING	V	Defense mechanisms	66
MAG100	d__Bacteria;p__Bacteroidota;c__Bacteroidia;o__AKYH767;f__2-12-FULL-35-15;g__2-12-FULL-35-15;s__Unclassified	CELLULAR PROCESSES AND SIGNALING	W	Extracellular structures	9
MAG100	d__Bacteria;p__Bacteroidota;c__Bacteroidia;o__AKYH767;f__2-12-FULL-35-15;g__2-12-FULL-35-15;s__Unclassified	CELLULAR PROCESSES AND SIGNALING	X	Mobilome: prophages, transposons	28
MAG100	d__Bacteria;p__Bacteroidota;c__Bacteroidia;o__AKYH767;f__2-12-FULL-35-15;g__2-12-FULL-35-15;s__Unclassified	CELLULAR PROCESSES AND SIGNALING	Z	Cytoskeleton	3
MAG100	d__Bacteria;p__Bacteroidota;c__Bacteroidia;o__AKYH767;f__2-12-FULL-35-15;g__2-12-FULL-35-15;s__Unclassified	INFORMATION STORAGE AND PROCESSING	J	Translation, ribosomal structure and biogenesis	204
MAG100	d__Bacteria;p__Bacteroidota;c__Bacteroidia;o__AKYH767;f__2-12-FULL-35-15;g__2-12-FULL-35-15;s__Unclassified	INFORMATION STORAGE AND PROCESSING	K	Transcription	111
MAG100	d__Bacteria;p__Bacteroidota;c__Bacteroidia;o__AKYH767;f__2-12-FULL-35-15;g__2-12-FULL-35-15;s__Unclassified	INFORMATION STORAGE AND PROCESSING	L	Replication, recombination and repair	107
MAG100	d__Bacteria;p__Bacteroidota;c__Bacteroidia;o__AKYH767;f__2-12-FULL-35-15;g__2-12-FULL-35-15;s__Unclassified	METABOLISM	C	Energy production and conversion	102
MAG100	d__Bacteria;p__Bacteroidota;c__Bacteroidia;o__AKYH767;f__2-12-FULL-35-15;g__2-12-FULL-35-15;s__Unclassified	METABOLISM	E	Amino acid transport and metabolism	166
MAG100	d__Bacteria;p__Bacteroidota;c__Bacteroidia;o__AKYH767;f__2-12-FULL-35-15;g__2-12-FULL-35-15;s__Unclassified	METABOLISM	F	Nucleotide transport and metabolism	55
MAG100	d__Bacteria;p__Bacteroidota;c__Bacteroidia;o__AKYH767;f__2-12-FULL-35-15;g__2-12-FULL-35-15;s__Unclassified	METABOLISM	G	Carbohydrate transport and metabolism	77
MAG100	d__Bacteria;p__Bacteroidota;c__Bacteroidia;o__AKYH767;f__2-12-FULL-35-15;g__2-12-FULL-35-15;s__Unclassified	METABOLISM	H	Coenzyme transport and metabolism	141
MAG100	d__Bacteria;p__Bacteroidota;c__Bacteroidia;o__AKYH767;f__2-12-FULL-35-15;g__2-12-FULL-35-15;s__Unclassified	METABOLISM	I	Lipid transport and metabolism	115
MAG100	d__Bacteria;p__Bacteroidota;c__Bacteroidia;o__AKYH767;f__2-12-FULL-35-15;g__2-12-FULL-35-15;s__Unclassified	METABOLISM	P	Inorganic ion transport and metabolism	100
MAG100	d__Bacteria;p__Bacteroidota;c__Bacteroidia;o__AKYH767;f__2-12-FULL-35-15;g__2-12-FULL-35-15;s__Unclassified	METABOLISM	Q	Secondary metabolites biosynthesis, transport and catabolism	41
MAG100	d__Bacteria;p__Bacteroidota;c__Bacteroidia;o__AKYH767;f__2-12-FULL-35-15;g__2-12-FULL-35-15;s__Unclassified	POORLY CHARACTERIZED	R	General function prediction only	165
MAG100	d__Bacteria;p__Bacteroidota;c__Bacteroidia;o__AKYH767;f__2-12-FULL-35-15;g__2-12-FULL-35-15;s__Unclassified	POORLY CHARACTERIZED	S	Function unknown	123
MAG1005	d__Bacteria;p__Actinomycetota;c__Thermoleophilia;o__Gaiellales;f__Gaiellaceae;g__JACCRW01;s__Unclassified	CELLULAR PROCESSES AND SIGNALING	D	Cell cycle control, cell division, chromosome partitioning	30
MAG1005	d__Bacteria;p__Actinomycetota;c__Thermoleophilia;o__Gaiellales;f__Gaiellaceae;g__JACCRW01;s__Unclassified	CELLULAR PROCESSES AND SIGNALING	M	Cell wall/membrane/envelope biogenesis	130
MAG1005	d__Bacteria;p__Actinomycetota;c__Thermoleophilia;o__Gaiellales;f__Gaiellaceae;g__JACCRW01;s__Unclassified	CELLULAR PROCESSES AND SIGNALING	N	Cell motility	15
MAG1005	d__Bacteria;p__Actinomycetota;c__Thermoleophilia;o__Gaiellales;f__Gaiellaceae;g__JACCRW01;s__Unclassified	CELLULAR PROCESSES AND SIGNALING	O	Posttranslational modification, protein turnover, chaperones	132
MAG1005	d__Bacteria;p__Actinomycetota;c__Thermoleophilia;o__Gaiellales;f__Gaiellaceae;g__JACCRW01;s__Unclassified	CELLULAR PROCESSES AND SIGNALING	T	Signal transduction mechanisms	162
MAG1005	d__Bacteria;p__Actinomycetota;c__Thermoleophilia;o__Gaiellales;f__Gaiellaceae;g__JACCRW01;s__Unclassified	CELLULAR PROCESSES AND SIGNALING	U	Intracellular trafficking, secretion, and vesicular transport	25
MAG1005	d__Bacteria;p__Actinomycetota;c__Thermoleophilia;o__Gaiellales;f__Gaiellaceae;g__JACCRW01;s__Unclassified	CELLULAR PROCESSES AND SIGNALING	V	Defense mechanisms	49
MAG1005	d__Bacteria;p__Actinomycetota;c__Thermoleophilia;o__Gaiellales;f__Gaiellaceae;g__JACCRW01;s__Unclassified	CELLULAR PROCESSES AND SIGNALING	W	Extracellular structures	10
MAG1005	d__Bacteria;p__Actinomycetota;c__Thermoleophilia;o__Gaiellales;f__Gaiellaceae;g__JACCRW01;s__Unclassified	CELLULAR PROCESSES AND SIGNALING	X	Mobilome: prophages, transposons	4
MAG1005	d__Bacteria;p__Actinomycetota;c__Thermoleophilia;o__Gaiellales;f__Gaiellaceae;g__JACCRW01;s__Unclassified	CELLULAR PROCESSES AND SIGNALING	Z	Cytoskeleton	1
MAG1005	d__Bacteria;p__Actinomycetota;c__Thermoleophilia;o__Gaiellales;f__Gaiellaceae;g__JACCRW01;s__Unclassified	INFORMATION STORAGE AND PROCESSING	J	Translation, ribosomal structure and biogenesis	170
MAG1005	d__Bacteria;p__Actinomycetota;c__Thermoleophilia;o__Gaiellales;f__Gaiellaceae;g__JACCRW01;s__Unclassified	INFORMATION STORAGE AND PROCESSING	K	Transcription	137
MAG1005	d__Bacteria;p__Actinomycetota;c__Thermoleophilia;o__Gaiellales;f__Gaiellaceae;g__JACCRW01;s__Unclassified	INFORMATION STORAGE AND PROCESSING	L	Replication, recombination and repair	101
MAG1005	d__Bacteria;p__Actinomycetota;c__Thermoleophilia;o__Gaiellales;f__Gaiellaceae;g__JACCRW01;s__Unclassified	METABOLISM	C	Energy production and conversion	146
MAG1005	d__Bacteria;p__Actinomycetota;c__Thermoleophilia;o__Gaiellales;f__Gaiellaceae;g__JACCRW01;s__Unclassified	METABOLISM	E	Amino acid transport and metabolism	251
MAG1005	d__Bacteria;p__Actinomycetota;c__Thermoleophilia;o__Gaiellales;f__Gaiellaceae;g__JACCRW01;s__Unclassified	METABOLISM	F	Nucleotide transport and metabolism	84
MAG1005	d__Bacteria;p__Actinomycetota;c__Thermoleophilia;o__Gaiellales;f__Gaiellaceae;g__JACCRW01;s__Unclassified	METABOLISM	G	Carbohydrate transport and metabolism	142
MAG1005	d__Bacteria;p__Actinomycetota;c__Thermoleophilia;o__Gaiellales;f__Gaiellaceae;g__JACCRW01;s__Unclassified	METABOLISM	H	Coenzyme transport and metabolism	152
MAG1005	d__Bacteria;p__Actinomycetota;c__Thermoleophilia;o__Gaiellales;f__Gaiellaceae;g__JACCRW01;s__Unclassified	METABOLISM	I	Lipid transport and metabolism	132
MAG1005	d__Bacteria;p__Actinomycetota;c__Thermoleophilia;o__Gaiellales;f__Gaiellaceae;g__JACCRW01;s__Unclassified	METABOLISM	P	Inorganic ion transport and metabolism	93
MAG1005	d__Bacteria;p__Actinomycetota;c__Thermoleophilia;o__Gaiellales;f__Gaiellaceae;g__JACCRW01;s__Unclassified	METABOLISM	Q	Secondary metabolites biosynthesis, transport and catabolism	43
MAG1005	d__Bacteria;p__Actinomycetota;c__Thermoleophilia;o__Gaiellales;f__Gaiellaceae;g__JACCRW01;s__Unclassified	POORLY CHARACTERIZED	R	General function prediction only	233
MAG1005	d__Bacteria;p__Actinomycetota;c__Thermoleophilia;o__Gaiellales;f__Gaiellaceae;g__JACCRW01;s__Unclassified	POORLY CHARACTERIZED	S	Function unknown	66
MAG1011	d__Bacteria;p__Pseudomonadota;c__Alphaproteobacteria;o__Sphingomonadales;f__Sphingomonadaceae;g__Allosphingosinicella;s__Unclassified	CELLULAR PROCESSES AND SIGNALING	D	Cell cycle control, cell division, chromosome partitioning	45
MAG1011	d__Bacteria;p__Pseudomonadota;c__Alphaproteobacteria;o__Sphingomonadales;f__Sphingomonadaceae;g__Allosphingosinicella;s__Unclassified	CELLULAR PROCESSES AND SIGNALING	M	Cell wall/membrane/envelope biogenesis	212
MAG1011	d__Bacteria;p__Pseudomonadota;c__Alphaproteobacteria;o__Sphingomonadales;f__Sphingomonadaceae;g__Allosphingosinicella;s__Unclassified	CELLULAR PROCESSES AND SIGNALING	N	Cell motility	46
MAG1011	d__Bacteria;p__Pseudomonadota;c__Alphaproteobacteria;o__Sphingomonadales;f__Sphingomonadaceae;g__Allosphingosinicella;s__Unclassified	CELLULAR PROCESSES AND SIGNALING	O	Posttranslational modification, protein turnover, chaperones	189
MAG1011	d__Bacteria;p__Pseudomonadota;c__Alphaproteobacteria;o__Sphingomonadales;f__Sphingomonadaceae;g__Allosphingosinicella;s__Unclassified	CELLULAR PROCESSES AND SIGNALING	T	Signal transduction mechanisms	194
MAG1011	d__Bacteria;p__Pseudomonadota;c__Alphaproteobacteria;o__Sphingomonadales;f__Sphingomonadaceae;g__Allosphingosinicella;s__Unclassified	CELLULAR PROCESSES AND SIGNALING	U	Intracellular trafficking, secretion, and vesicular transport	71
MAG1011	d__Bacteria;p__Pseudomonadota;c__Alphaproteobacteria;o__Sphingomonadales;f__Sphingomonadaceae;g__Allosphingosinicella;s__Unclassified	CELLULAR PROCESSES AND SIGNALING	V	Defense mechanisms	98
MAG1011	d__Bacteria;p__Pseudomonadota;c__Alphaproteobacteria;o__Sphingomonadales;f__Sphingomonadaceae;g__Allosphingosinicella;s__Unclassified	CELLULAR PROCESSES AND SIGNALING	W	Extracellular structures	35
MAG1011	d__Bacteria;p__Pseudomonadota;c__Alphaproteobacteria;o__Sphingomonadales;f__Sphingomonadaceae;g__Allosphingosinicella;s__Unclassified	CELLULAR PROCESSES AND SIGNALING	X	Mobilome: prophages, transposons	38
MAG1011	d__Bacteria;p__Pseudomonadota;c__Alphaproteobacteria;o__Sphingomonadales;f__Sphingomonadaceae;g__Allosphingosinicella;s__Unclassified	CELLULAR PROCESSES AND SIGNALING	Z	Cytoskeleton	2
MAG1011	d__Bacteria;p__Pseudomonadota;c__Alphaproteobacteria;o__Sphingomonadales;f__Sphingomonadaceae;g__Allosphingosinicella;s__Unclassified	INFORMATION STORAGE AND PROCESSING	A	RNA processing and modification	1
MAG1011	d__Bacteria;p__Pseudomonadota;c__Alphaproteobacteria;o__Sphingomonadales;f__Sphingomonadaceae;g__Allosphingosinicella;s__Unclassified	INFORMATION STORAGE AND PROCESSING	B	Chromatin structure and dynamics	2
MAG1011	d__Bacteria;p__Pseudomonadota;c__Alphaproteobacteria;o__Sphingomonadales;f__Sphingomonadaceae;g__Allosphingosinicella;s__Unclassified	INFORMATION STORAGE AND PROCESSING	J	Translation, ribosomal structure and biogenesis	204
MAG1011	d__Bacteria;p__Pseudomonadota;c__Alphaproteobacteria;o__Sphingomonadales;f__Sphingomonadaceae;g__Allosphingosinicella;s__Unclassified	INFORMATION STORAGE AND PROCESSING	K	Transcription	169
MAG1011	d__Bacteria;p__Pseudomonadota;c__Alphaproteobacteria;o__Sphingomonadales;f__Sphingomonadaceae;g__Allosphingosinicella;s__Unclassified	INFORMATION STORAGE AND PROCESSING	L	Replication, recombination and repair	135
MAG1011	d__Bacteria;p__Pseudomonadota;c__Alphaproteobacteria;o__Sphingomonadales;f__Sphingomonadaceae;g__Allosphingosinicella;s__Unclassified	METABOLISM	C	Energy production and conversion	152
MAG1011	d__Bacteria;p__Pseudomonadota;c__Alphaproteobacteria;o__Sphingomonadales;f__Sphingomonadaceae;g__Allosphingosinicella;s__Unclassified	METABOLISM	E	Amino acid transport and metabolism	198
MAG1011	d__Bacteria;p__Pseudomonadota;c__Alphaproteobacteria;o__Sphingomonadales;f__Sphingomonadaceae;g__Allosphingosinicella;s__Unclassified	METABOLISM	F	Nucleotide transport and metabolism	82
MAG1011	d__Bacteria;p__Pseudomonadota;c__Alphaproteobacteria;o__Sphingomonadales;f__Sphingomonadaceae;g__Allosphingosinicella;s__Unclassified	METABOLISM	G	Carbohydrate transport and metabolism	121
MAG1011	d__Bacteria;p__Pseudomonadota;c__Alphaproteobacteria;o__Sphingomonadales;f__Sphingomonadaceae;g__Allosphingosinicella;s__Unclassified	METABOLISM	H	Coenzyme transport and metabolism	150
MAG1011	d__Bacteria;p__Pseudomonadota;c__Alphaproteobacteria;o__Sphingomonadales;f__Sphingomonadaceae;g__Allosphingosinicella;s__Unclassified	METABOLISM	I	Lipid transport and metabolism	179
MAG1011	d__Bacteria;p__Pseudomonadota;c__Alphaproteobacteria;o__Sphingomonadales;f__Sphingomonadaceae;g__Allosphingosinicella;s__Unclassified	METABOLISM	P	Inorganic ion transport and metabolism	121
MAG1011	d__Bacteria;p__Pseudomonadota;c__Alphaproteobacteria;o__Sphingomonadales;f__Sphingomonadaceae;g__Allosphingosinicella;s__Unclassified	METABOLISM	Q	Secondary metabolites biosynthesis, transport and catabolism	119
MAG1011	d__Bacteria;p__Pseudomonadota;c__Alphaproteobacteria;o__Sphingomonadales;f__Sphingomonadaceae;g__Allosphingosinicella;s__Unclassified	POORLY CHARACTERIZED	R	General function prediction only	261
MAG1011	d__Bacteria;p__Pseudomonadota;c__Alphaproteobacteria;o__Sphingomonadales;f__Sphingomonadaceae;g__Allosphingosinicella;s__Unclassified	POORLY CHARACTERIZED	S	Function unknown	162
MAG1014	d__Bacteria;p__Pseudomonadota;c__Gammaproteobacteria;o__Xanthomonadales;f__Xanthomonadaceae;g__Lysobacter;s__Unclassified	CELLULAR PROCESSES AND SIGNALING	D	Cell cycle control, cell division, chromosome partitioning	50
MAG1014	d__Bacteria;p__Pseudomonadota;c__Gammaproteobacteria;o__Xanthomonadales;f__Xanthomonadaceae;g__Lysobacter;s__Unclassified	CELLULAR PROCESSES AND SIGNALING	M	Cell wall/membrane/envelope biogenesis	246
MAG1014	d__Bacteria;p__Pseudomonadota;c__Gammaproteobacteria;o__Xanthomonadales;f__Xanthomonadaceae;g__Lysobacter;s__Unclassified	CELLULAR PROCESSES AND SIGNALING	N	Cell motility	89
MAG1014	d__Bacteria;p__Pseudomonadota;c__Gammaproteobacteria;o__Xanthomonadales;f__Xanthomonadaceae;g__Lysobacter;s__Unclassified	CELLULAR PROCESSES AND SIGNALING	O	Posttranslational modification, protein turnover, chaperones	216
MAG1014	d__Bacteria;p__Pseudomonadota;c__Gammaproteobacteria;o__Xanthomonadales;f__Xanthomonadaceae;g__Lysobacter;s__Unclassified	CELLULAR PROCESSES AND SIGNALING	T	Signal transduction mechanisms	269
MAG1014	d__Bacteria;p__Pseudomonadota;c__Gammaproteobacteria;o__Xanthomonadales;f__Xanthomonadaceae;g__Lysobacter;s__Unclassified	CELLULAR PROCESSES AND SIGNALING	U	Intracellular trafficking, secretion, and vesicular transport	106
MAG1014	d__Bacteria;p__Pseudomonadota;c__Gammaproteobacteria;o__Xanthomonadales;f__Xanthomonadaceae;g__Lysobacter;s__Unclassified	CELLULAR PROCESSES AND SIGNALING	V	Defense mechanisms	97
MAG1014	d__Bacteria;p__Pseudomonadota;c__Gammaproteobacteria;o__Xanthomonadales;f__Xanthomonadaceae;g__Lysobacter;s__Unclassified	CELLULAR PROCESSES AND SIGNALING	W	Extracellular structures	40
MAG1014	d__Bacteria;p__Pseudomonadota;c__Gammaproteobacteria;o__Xanthomonadales;f__Xanthomonadaceae;g__Lysobacter;s__Unclassified	CELLULAR PROCESSES AND SIGNALING	X	Mobilome: prophages, transposons	66
MAG1014	d__Bacteria;p__Pseudomonadota;c__Gammaproteobacteria;o__Xanthomonadales;f__Xanthomonadaceae;g__Lysobacter;s__Unclassified	CELLULAR PROCESSES AND SIGNALING	Z	Cytoskeleton	4
MAG1014	d__Bacteria;p__Pseudomonadota;c__Gammaproteobacteria;o__Xanthomonadales;f__Xanthomonadaceae;g__Lysobacter;s__Unclassified	INFORMATION STORAGE AND PROCESSING	A	RNA processing and modification	1
MAG1014	d__Bacteria;p__Pseudomonadota;c__Gammaproteobacteria;o__Xanthomonadales;f__Xanthomonadaceae;g__Lysobacter;s__Unclassified	INFORMATION STORAGE AND PROCESSING	J	Translation, ribosomal structure and biogenesis	230
MAG1014	d__Bacteria;p__Pseudomonadota;c__Gammaproteobacteria;o__Xanthomonadales;f__Xanthomonadaceae;g__Lysobacter;s__Unclassified	INFORMATION STORAGE AND PROCESSING	K	Transcription	168
MAG1014	d__Bacteria;p__Pseudomonadota;c__Gammaproteobacteria;o__Xanthomonadales;f__Xanthomonadaceae;g__Lysobacter;s__Unclassified	INFORMATION STORAGE AND PROCESSING	L	Replication, recombination and repair	127
MAG1014	d__Bacteria;p__Pseudomonadota;c__Gammaproteobacteria;o__Xanthomonadales;f__Xanthomonadaceae;g__Lysobacter;s__Unclassified	METABOLISM	C	Energy production and conversion	148
MAG1014	d__Bacteria;p__Pseudomonadota;c__Gammaproteobacteria;o__Xanthomonadales;f__Xanthomonadaceae;g__Lysobacter;s__Unclassified	METABOLISM	E	Amino acid transport and metabolism	197
MAG1014	d__Bacteria;p__Pseudomonadota;c__Gammaproteobacteria;o__Xanthomonadales;f__Xanthomonadaceae;g__Lysobacter;s__Unclassified	METABOLISM	F	Nucleotide transport and metabolism	69
MAG1014	d__Bacteria;p__Pseudomonadota;c__Gammaproteobacteria;o__Xanthomonadales;f__Xanthomonadaceae;g__Lysobacter;s__Unclassified	METABOLISM	G	Carbohydrate transport and metabolism	78
MAG1014	d__Bacteria;p__Pseudomonadota;c__Gammaproteobacteria;o__Xanthomonadales;f__Xanthomonadaceae;g__Lysobacter;s__Unclassified	METABOLISM	H	Coenzyme transport and metabolism	164
MAG1014	d__Bacteria;p__Pseudomonadota;c__Gammaproteobacteria;o__Xanthomonadales;f__Xanthomonadaceae;g__Lysobacter;s__Unclassified	METABOLISM	I	Lipid transport and metabolism	153
MAG1014	d__Bacteria;p__Pseudomonadota;c__Gammaproteobacteria;o__Xanthomonadales;f__Xanthomonadaceae;g__Lysobacter;s__Unclassified	METABOLISM	P	Inorganic ion transport and metabolism	132
MAG1014	d__Bacteria;p__Pseudomonadota;c__Gammaproteobacteria;o__Xanthomonadales;f__Xanthomonadaceae;g__Lysobacter;s__Unclassified	METABOLISM	Q	Secondary metabolites biosynthesis, transport and catabolism	78
MAG1014	d__Bacteria;p__Pseudomonadota;c__Gammaproteobacteria;o__Xanthomonadales;f__Xanthomonadaceae;g__Lysobacter;s__Unclassified	POORLY CHARACTERIZED	R	General function prediction only	225
MAG1014	d__Bacteria;p__Pseudomonadota;c__Gammaproteobacteria;o__Xanthomonadales;f__Xanthomonadaceae;g__Lysobacter;s__Unclassified	POORLY CHARACTERIZED	S	Function unknown	152
MAG1023	d__Bacteria;p__Acidobacteriota;c__Thermoanaerobaculia;o__UBA5704;f__UBA5704;g__UBA5704;s__Unclassified	CELLULAR PROCESSES AND SIGNALING	D	Cell cycle control, cell division, chromosome partitioning	98
MAG1023	d__Bacteria;p__Acidobacteriota;c__Thermoanaerobaculia;o__UBA5704;f__UBA5704;g__UBA5704;s__Unclassified	CELLULAR PROCESSES AND SIGNALING	M	Cell wall/membrane/envelope biogenesis	427
MAG1023	d__Bacteria;p__Acidobacteriota;c__Thermoanaerobaculia;o__UBA5704;f__UBA5704;g__UBA5704;s__Unclassified	CELLULAR PROCESSES AND SIGNALING	N	Cell motility	69
MAG1023	d__Bacteria;p__Acidobacteriota;c__Thermoanaerobaculia;o__UBA5704;f__UBA5704;g__UBA5704;s__Unclassified	CELLULAR PROCESSES AND SIGNALING	O	Posttranslational modification, protein turnover, chaperones	313
MAG1023	d__Bacteria;p__Acidobacteriota;c__Thermoanaerobaculia;o__UBA5704;f__UBA5704;g__UBA5704;s__Unclassified	CELLULAR PROCESSES AND SIGNALING	T	Signal transduction mechanisms	443
MAG1023	d__Bacteria;p__Acidobacteriota;c__Thermoanaerobaculia;o__UBA5704;f__UBA5704;g__UBA5704;s__Unclassified	CELLULAR PROCESSES AND SIGNALING	U	Intracellular trafficking, secretion, and vesicular transport	98
MAG1023	d__Bacteria;p__Acidobacteriota;c__Thermoanaerobaculia;o__UBA5704;f__UBA5704;g__UBA5704;s__Unclassified	CELLULAR PROCESSES AND SIGNALING	V	Defense mechanisms	271
MAG1023	d__Bacteria;p__Acidobacteriota;c__Thermoanaerobaculia;o__UBA5704;f__UBA5704;g__UBA5704;s__Unclassified	CELLULAR PROCESSES AND SIGNALING	W	Extracellular structures	56
MAG1023	d__Bacteria;p__Acidobacteriota;c__Thermoanaerobaculia;o__UBA5704;f__UBA5704;g__UBA5704;s__Unclassified	CELLULAR PROCESSES AND SIGNALING	X	Mobilome: prophages, transposons	64
MAG1023	d__Bacteria;p__Acidobacteriota;c__Thermoanaerobaculia;o__UBA5704;f__UBA5704;g__UBA5704;s__Unclassified	CELLULAR PROCESSES AND SIGNALING	Z	Cytoskeleton	10
MAG1023	d__Bacteria;p__Acidobacteriota;c__Thermoanaerobaculia;o__UBA5704;f__UBA5704;g__UBA5704;s__Unclassified	INFORMATION STORAGE AND PROCESSING	B	Chromatin structure and dynamics	1
MAG1023	d__Bacteria;p__Acidobacteriota;c__Thermoanaerobaculia;o__UBA5704;f__UBA5704;g__UBA5704;s__Unclassified	INFORMATION STORAGE AND PROCESSING	J	Translation, ribosomal structure and biogenesis	282
MAG1023	d__Bacteria;p__Acidobacteriota;c__Thermoanaerobaculia;o__UBA5704;f__UBA5704;g__UBA5704;s__Unclassified	INFORMATION STORAGE AND PROCESSING	K	Transcription	251
MAG1023	d__Bacteria;p__Acidobacteriota;c__Thermoanaerobaculia;o__UBA5704;f__UBA5704;g__UBA5704;s__Unclassified	INFORMATION STORAGE AND PROCESSING	L	Replication, recombination and repair	190
MAG1023	d__Bacteria;p__Acidobacteriota;c__Thermoanaerobaculia;o__UBA5704;f__UBA5704;g__UBA5704;s__Unclassified	METABOLISM	C	Energy production and conversion	236
MAG1023	d__Bacteria;p__Acidobacteriota;c__Thermoanaerobaculia;o__UBA5704;f__UBA5704;g__UBA5704;s__Unclassified	METABOLISM	E	Amino acid transport and metabolism	357
MAG1023	d__Bacteria;p__Acidobacteriota;c__Thermoanaerobaculia;o__UBA5704;f__UBA5704;g__UBA5704;s__Unclassified	METABOLISM	F	Nucleotide transport and metabolism	116
MAG1023	d__Bacteria;p__Acidobacteriota;c__Thermoanaerobaculia;o__UBA5704;f__UBA5704;g__UBA5704;s__Unclassified	METABOLISM	G	Carbohydrate transport and metabolism	236
MAG1023	d__Bacteria;p__Acidobacteriota;c__Thermoanaerobaculia;o__UBA5704;f__UBA5704;g__UBA5704;s__Unclassified	METABOLISM	H	Coenzyme transport and metabolism	262
MAG1023	d__Bacteria;p__Acidobacteriota;c__Thermoanaerobaculia;o__UBA5704;f__UBA5704;g__UBA5704;s__Unclassified	METABOLISM	I	Lipid transport and metabolism	347
MAG1023	d__Bacteria;p__Acidobacteriota;c__Thermoanaerobaculia;o__UBA5704;f__UBA5704;g__UBA5704;s__Unclassified	METABOLISM	P	Inorganic ion transport and metabolism	222
MAG1023	d__Bacteria;p__Acidobacteriota;c__Thermoanaerobaculia;o__UBA5704;f__UBA5704;g__UBA5704;s__Unclassified	METABOLISM	Q	Secondary metabolites biosynthesis, transport and catabolism	193
MAG1023	d__Bacteria;p__Acidobacteriota;c__Thermoanaerobaculia;o__UBA5704;f__UBA5704;g__UBA5704;s__Unclassified	POORLY CHARACTERIZED	R	General function prediction only	539
MAG1023	d__Bacteria;p__Acidobacteriota;c__Thermoanaerobaculia;o__UBA5704;f__UBA5704;g__UBA5704;s__Unclassified	POORLY CHARACTERIZED	S	Function unknown	218
MAG1026	d__Bacteria;p__Dormibacterota;c__Dormibacteria;o__Unclassified;f__Unclassified;g__Unclassified;s__Unclassified	CELLULAR PROCESSES AND SIGNALING	D	Cell cycle control, cell division, chromosome partitioning	28
MAG1026	d__Bacteria;p__Dormibacterota;c__Dormibacteria;o__Unclassified;f__Unclassified;g__Unclassified;s__Unclassified	CELLULAR PROCESSES AND SIGNALING	M	Cell wall/membrane/envelope biogenesis	126
MAG1026	d__Bacteria;p__Dormibacterota;c__Dormibacteria;o__Unclassified;f__Unclassified;g__Unclassified;s__Unclassified	CELLULAR PROCESSES AND SIGNALING	N	Cell motility	15
MAG1026	d__Bacteria;p__Dormibacterota;c__Dormibacteria;o__Unclassified;f__Unclassified;g__Unclassified;s__Unclassified	CELLULAR PROCESSES AND SIGNALING	O	Posttranslational modification, protein turnover, chaperones	84
MAG1026	d__Bacteria;p__Dormibacterota;c__Dormibacteria;o__Unclassified;f__Unclassified;g__Unclassified;s__Unclassified	CELLULAR PROCESSES AND SIGNALING	T	Signal transduction mechanisms	87
MAG1026	d__Bacteria;p__Dormibacterota;c__Dormibacteria;o__Unclassified;f__Unclassified;g__Unclassified;s__Unclassified	CELLULAR PROCESSES AND SIGNALING	U	Intracellular trafficking, secretion, and vesicular transport	21
MAG1026	d__Bacteria;p__Dormibacterota;c__Dormibacteria;o__Unclassified;f__Unclassified;g__Unclassified;s__Unclassified	CELLULAR PROCESSES AND SIGNALING	V	Defense mechanisms	39
MAG1026	d__Bacteria;p__Dormibacterota;c__Dormibacteria;o__Unclassified;f__Unclassified;g__Unclassified;s__Unclassified	CELLULAR PROCESSES AND SIGNALING	W	Extracellular structures	7
MAG1026	d__Bacteria;p__Dormibacterota;c__Dormibacteria;o__Unclassified;f__Unclassified;g__Unclassified;s__Unclassified	CELLULAR PROCESSES AND SIGNALING	X	Mobilome: prophages, transposons	4
MAG1026	d__Bacteria;p__Dormibacterota;c__Dormibacteria;o__Unclassified;f__Unclassified;g__Unclassified;s__Unclassified	INFORMATION STORAGE AND PROCESSING	J	Translation, ribosomal structure and biogenesis	142
MAG1026	d__Bacteria;p__Dormibacterota;c__Dormibacteria;o__Unclassified;f__Unclassified;g__Unclassified;s__Unclassified	INFORMATION STORAGE AND PROCESSING	K	Transcription	86
MAG1026	d__Bacteria;p__Dormibacterota;c__Dormibacteria;o__Unclassified;f__Unclassified;g__Unclassified;s__Unclassified	INFORMATION STORAGE AND PROCESSING	L	Replication, recombination and repair	72
MAG1026	d__Bacteria;p__Dormibacterota;c__Dormibacteria;o__Unclassified;f__Unclassified;g__Unclassified;s__Unclassified	METABOLISM	C	Energy production and conversion	83
MAG1026	d__Bacteria;p__Dormibacterota;c__Dormibacteria;o__Unclassified;f__Unclassified;g__Unclassified;s__Unclassified	METABOLISM	E	Amino acid transport and metabolism	147
MAG1026	d__Bacteria;p__Dormibacterota;c__Dormibacteria;o__Unclassified;f__Unclassified;g__Unclassified;s__Unclassified	METABOLISM	F	Nucleotide transport and metabolism	46
MAG1026	d__Bacteria;p__Dormibacterota;c__Dormibacteria;o__Unclassified;f__Unclassified;g__Unclassified;s__Unclassified	METABOLISM	G	Carbohydrate transport and metabolism	68
MAG1026	d__Bacteria;p__Dormibacterota;c__Dormibacteria;o__Unclassified;f__Unclassified;g__Unclassified;s__Unclassified	METABOLISM	H	Coenzyme transport and metabolism	118
MAG1026	d__Bacteria;p__Dormibacterota;c__Dormibacteria;o__Unclassified;f__Unclassified;g__Unclassified;s__Unclassified	METABOLISM	I	Lipid transport and metabolism	110
MAG1026	d__Bacteria;p__Dormibacterota;c__Dormibacteria;o__Unclassified;f__Unclassified;g__Unclassified;s__Unclassified	METABOLISM	P	Inorganic ion transport and metabolism	42
MAG1026	d__Bacteria;p__Dormibacterota;c__Dormibacteria;o__Unclassified;f__Unclassified;g__Unclassified;s__Unclassified	METABOLISM	Q	Secondary metabolites biosynthesis, transport and catabolism	24
MAG1026	d__Bacteria;p__Dormibacterota;c__Dormibacteria;o__Unclassified;f__Unclassified;g__Unclassified;s__Unclassified	POORLY CHARACTERIZED	R	General function prediction only	149
MAG1026	d__Bacteria;p__Dormibacterota;c__Dormibacteria;o__Unclassified;f__Unclassified;g__Unclassified;s__Unclassified	POORLY CHARACTERIZED	S	Function unknown	38
MAG103	d__Bacteria;p__Acidobacteriota;c__Blastocatellia;o__Pyrinomonadales;f__Pyrinomonadaceae;g__Unclassified;s__Unclassified	CELLULAR PROCESSES AND SIGNALING	D	Cell cycle control, cell division, chromosome partitioning	60
MAG103	d__Bacteria;p__Acidobacteriota;c__Blastocatellia;o__Pyrinomonadales;f__Pyrinomonadaceae;g__Unclassified;s__Unclassified	CELLULAR PROCESSES AND SIGNALING	M	Cell wall/membrane/envelope biogenesis	283
MAG103	d__Bacteria;p__Acidobacteriota;c__Blastocatellia;o__Pyrinomonadales;f__Pyrinomonadaceae;g__Unclassified;s__Unclassified	CELLULAR PROCESSES AND SIGNALING	N	Cell motility	74
MAG103	d__Bacteria;p__Acidobacteriota;c__Blastocatellia;o__Pyrinomonadales;f__Pyrinomonadaceae;g__Unclassified;s__Unclassified	CELLULAR PROCESSES AND SIGNALING	O	Posttranslational modification, protein turnover, chaperones	274
MAG103	d__Bacteria;p__Acidobacteriota;c__Blastocatellia;o__Pyrinomonadales;f__Pyrinomonadaceae;g__Unclassified;s__Unclassified	CELLULAR PROCESSES AND SIGNALING	T	Signal transduction mechanisms	322
MAG103	d__Bacteria;p__Acidobacteriota;c__Blastocatellia;o__Pyrinomonadales;f__Pyrinomonadaceae;g__Unclassified;s__Unclassified	CELLULAR PROCESSES AND SIGNALING	U	Intracellular trafficking, secretion, and vesicular transport	72
MAG103	d__Bacteria;p__Acidobacteriota;c__Blastocatellia;o__Pyrinomonadales;f__Pyrinomonadaceae;g__Unclassified;s__Unclassified	CELLULAR PROCESSES AND SIGNALING	V	Defense mechanisms	123
MAG103	d__Bacteria;p__Acidobacteriota;c__Blastocatellia;o__Pyrinomonadales;f__Pyrinomonadaceae;g__Unclassified;s__Unclassified	CELLULAR PROCESSES AND SIGNALING	W	Extracellular structures	33
MAG103	d__Bacteria;p__Acidobacteriota;c__Blastocatellia;o__Pyrinomonadales;f__Pyrinomonadaceae;g__Unclassified;s__Unclassified	CELLULAR PROCESSES AND SIGNALING	X	Mobilome: prophages, transposons	40
MAG103	d__Bacteria;p__Acidobacteriota;c__Blastocatellia;o__Pyrinomonadales;f__Pyrinomonadaceae;g__Unclassified;s__Unclassified	CELLULAR PROCESSES AND SIGNALING	Z	Cytoskeleton	8
MAG103	d__Bacteria;p__Acidobacteriota;c__Blastocatellia;o__Pyrinomonadales;f__Pyrinomonadaceae;g__Unclassified;s__Unclassified	INFORMATION STORAGE AND PROCESSING	J	Translation, ribosomal structure and biogenesis	231
MAG103	d__Bacteria;p__Acidobacteriota;c__Blastocatellia;o__Pyrinomonadales;f__Pyrinomonadaceae;g__Unclassified;s__Unclassified	INFORMATION STORAGE AND PROCESSING	K	Transcription	185
MAG103	d__Bacteria;p__Acidobacteriota;c__Blastocatellia;o__Pyrinomonadales;f__Pyrinomonadaceae;g__Unclassified;s__Unclassified	INFORMATION STORAGE AND PROCESSING	L	Replication, recombination and repair	135
MAG103	d__Bacteria;p__Acidobacteriota;c__Blastocatellia;o__Pyrinomonadales;f__Pyrinomonadaceae;g__Unclassified;s__Unclassified	METABOLISM	C	Energy production and conversion	185
MAG103	d__Bacteria;p__Acidobacteriota;c__Blastocatellia;o__Pyrinomonadales;f__Pyrinomonadaceae;g__Unclassified;s__Unclassified	METABOLISM	E	Amino acid transport and metabolism	286
MAG103	d__Bacteria;p__Acidobacteriota;c__Blastocatellia;o__Pyrinomonadales;f__Pyrinomonadaceae;g__Unclassified;s__Unclassified	METABOLISM	F	Nucleotide transport and metabolism	92
MAG103	d__Bacteria;p__Acidobacteriota;c__Blastocatellia;o__Pyrinomonadales;f__Pyrinomonadaceae;g__Unclassified;s__Unclassified	METABOLISM	G	Carbohydrate transport and metabolism	238
MAG103	d__Bacteria;p__Acidobacteriota;c__Blastocatellia;o__Pyrinomonadales;f__Pyrinomonadaceae;g__Unclassified;s__Unclassified	METABOLISM	H	Coenzyme transport and metabolism	211
MAG103	d__Bacteria;p__Acidobacteriota;c__Blastocatellia;o__Pyrinomonadales;f__Pyrinomonadaceae;g__Unclassified;s__Unclassified	METABOLISM	I	Lipid transport and metabolism	137
MAG103	d__Bacteria;p__Acidobacteriota;c__Blastocatellia;o__Pyrinomonadales;f__Pyrinomonadaceae;g__Unclassified;s__Unclassified	METABOLISM	P	Inorganic ion transport and metabolism	159
MAG103	d__Bacteria;p__Acidobacteriota;c__Blastocatellia;o__Pyrinomonadales;f__Pyrinomonadaceae;g__Unclassified;s__Unclassified	METABOLISM	Q	Secondary metabolites biosynthesis, transport and catabolism	106
MAG103	d__Bacteria;p__Acidobacteriota;c__Blastocatellia;o__Pyrinomonadales;f__Pyrinomonadaceae;g__Unclassified;s__Unclassified	POORLY CHARACTERIZED	R	General function prediction only	383
MAG103	d__Bacteria;p__Acidobacteriota;c__Blastocatellia;o__Pyrinomonadales;f__Pyrinomonadaceae;g__Unclassified;s__Unclassified	POORLY CHARACTERIZED	S	Function unknown	129
MAG1032	d__Bacteria;p__Actinomycetota;c__Actinomycetia;o__Actinomycetales;f__Dermabacteraceae;g__Brachybacterium;s__Brachybacterium sp012799425	CELLULAR PROCESSES AND SIGNALING	D	Cell cycle control, cell division, chromosome partitioning	37
MAG1032	d__Bacteria;p__Actinomycetota;c__Actinomycetia;o__Actinomycetales;f__Dermabacteraceae;g__Brachybacterium;s__Brachybacterium sp012799425	CELLULAR PROCESSES AND SIGNALING	M	Cell wall/membrane/envelope biogenesis	159
MAG1032	d__Bacteria;p__Actinomycetota;c__Actinomycetia;o__Actinomycetales;f__Dermabacteraceae;g__Brachybacterium;s__Brachybacterium sp012799425	CELLULAR PROCESSES AND SIGNALING	N	Cell motility	9
MAG1032	d__Bacteria;p__Actinomycetota;c__Actinomycetia;o__Actinomycetales;f__Dermabacteraceae;g__Brachybacterium;s__Brachybacterium sp012799425	CELLULAR PROCESSES AND SIGNALING	O	Posttranslational modification, protein turnover, chaperones	124
MAG1032	d__Bacteria;p__Actinomycetota;c__Actinomycetia;o__Actinomycetales;f__Dermabacteraceae;g__Brachybacterium;s__Brachybacterium sp012799425	CELLULAR PROCESSES AND SIGNALING	T	Signal transduction mechanisms	114
MAG1032	d__Bacteria;p__Actinomycetota;c__Actinomycetia;o__Actinomycetales;f__Dermabacteraceae;g__Brachybacterium;s__Brachybacterium sp012799425	CELLULAR PROCESSES AND SIGNALING	U	Intracellular trafficking, secretion, and vesicular transport	28
MAG1032	d__Bacteria;p__Actinomycetota;c__Actinomycetia;o__Actinomycetales;f__Dermabacteraceae;g__Brachybacterium;s__Brachybacterium sp012799425	CELLULAR PROCESSES AND SIGNALING	V	Defense mechanisms	83
MAG1032	d__Bacteria;p__Actinomycetota;c__Actinomycetia;o__Actinomycetales;f__Dermabacteraceae;g__Brachybacterium;s__Brachybacterium sp012799425	CELLULAR PROCESSES AND SIGNALING	W	Extracellular structures	9
MAG1032	d__Bacteria;p__Actinomycetota;c__Actinomycetia;o__Actinomycetales;f__Dermabacteraceae;g__Brachybacterium;s__Brachybacterium sp012799425	CELLULAR PROCESSES AND SIGNALING	X	Mobilome: prophages, transposons	17
MAG1032	d__Bacteria;p__Actinomycetota;c__Actinomycetia;o__Actinomycetales;f__Dermabacteraceae;g__Brachybacterium;s__Brachybacterium sp012799425	INFORMATION STORAGE AND PROCESSING	J	Translation, ribosomal structure and biogenesis	179
MAG1032	d__Bacteria;p__Actinomycetota;c__Actinomycetia;o__Actinomycetales;f__Dermabacteraceae;g__Brachybacterium;s__Brachybacterium sp012799425	INFORMATION STORAGE AND PROCESSING	K	Transcription	206
MAG1032	d__Bacteria;p__Actinomycetota;c__Actinomycetia;o__Actinomycetales;f__Dermabacteraceae;g__Brachybacterium;s__Brachybacterium sp012799425	INFORMATION STORAGE AND PROCESSING	L	Replication, recombination and repair	113
MAG1032	d__Bacteria;p__Actinomycetota;c__Actinomycetia;o__Actinomycetales;f__Dermabacteraceae;g__Brachybacterium;s__Brachybacterium sp012799425	METABOLISM	C	Energy production and conversion	119
MAG1032	d__Bacteria;p__Actinomycetota;c__Actinomycetia;o__Actinomycetales;f__Dermabacteraceae;g__Brachybacterium;s__Brachybacterium sp012799425	METABOLISM	E	Amino acid transport and metabolism	248
MAG1032	d__Bacteria;p__Actinomycetota;c__Actinomycetia;o__Actinomycetales;f__Dermabacteraceae;g__Brachybacterium;s__Brachybacterium sp012799425	METABOLISM	F	Nucleotide transport and metabolism	100
MAG1032	d__Bacteria;p__Actinomycetota;c__Actinomycetia;o__Actinomycetales;f__Dermabacteraceae;g__Brachybacterium;s__Brachybacterium sp012799425	METABOLISM	G	Carbohydrate transport and metabolism	386
MAG1032	d__Bacteria;p__Actinomycetota;c__Actinomycetia;o__Actinomycetales;f__Dermabacteraceae;g__Brachybacterium;s__Brachybacterium sp012799425	METABOLISM	H	Coenzyme transport and metabolism	159
MAG1032	d__Bacteria;p__Actinomycetota;c__Actinomycetia;o__Actinomycetales;f__Dermabacteraceae;g__Brachybacterium;s__Brachybacterium sp012799425	METABOLISM	I	Lipid transport and metabolism	122
MAG1032	d__Bacteria;p__Actinomycetota;c__Actinomycetia;o__Actinomycetales;f__Dermabacteraceae;g__Brachybacterium;s__Brachybacterium sp012799425	METABOLISM	P	Inorganic ion transport and metabolism	162
MAG1032	d__Bacteria;p__Actinomycetota;c__Actinomycetia;o__Actinomycetales;f__Dermabacteraceae;g__Brachybacterium;s__Brachybacterium sp012799425	METABOLISM	Q	Secondary metabolites biosynthesis, transport and catabolism	41
MAG1032	d__Bacteria;p__Actinomycetota;c__Actinomycetia;o__Actinomycetales;f__Dermabacteraceae;g__Brachybacterium;s__Brachybacterium sp012799425	POORLY CHARACTERIZED	R	General function prediction only	249
MAG1032	d__Bacteria;p__Actinomycetota;c__Actinomycetia;o__Actinomycetales;f__Dermabacteraceae;g__Brachybacterium;s__Brachybacterium sp012799425	POORLY CHARACTERIZED	S	Function unknown	78
MAG1034	d__Bacteria;p__Gemmatimonadota;c__Gemmatimonadetes;o__Gemmatimonadales;f__Gemmatimonadaceae;g__UBA4720;s__Unclassified	CELLULAR PROCESSES AND SIGNALING	D	Cell cycle control, cell division, chromosome partitioning	43
MAG1034	d__Bacteria;p__Gemmatimonadota;c__Gemmatimonadetes;o__Gemmatimonadales;f__Gemmatimonadaceae;g__UBA4720;s__Unclassified	CELLULAR PROCESSES AND SIGNALING	M	Cell wall/membrane/envelope biogenesis	261
MAG1034	d__Bacteria;p__Gemmatimonadota;c__Gemmatimonadetes;o__Gemmatimonadales;f__Gemmatimonadaceae;g__UBA4720;s__Unclassified	CELLULAR PROCESSES AND SIGNALING	N	Cell motility	24
MAG1034	d__Bacteria;p__Gemmatimonadota;c__Gemmatimonadetes;o__Gemmatimonadales;f__Gemmatimonadaceae;g__UBA4720;s__Unclassified	CELLULAR PROCESSES AND SIGNALING	O	Posttranslational modification, protein turnover, chaperones	116
MAG1034	d__Bacteria;p__Gemmatimonadota;c__Gemmatimonadetes;o__Gemmatimonadales;f__Gemmatimonadaceae;g__UBA4720;s__Unclassified	CELLULAR PROCESSES AND SIGNALING	T	Signal transduction mechanisms	174
MAG1034	d__Bacteria;p__Gemmatimonadota;c__Gemmatimonadetes;o__Gemmatimonadales;f__Gemmatimonadaceae;g__UBA4720;s__Unclassified	CELLULAR PROCESSES AND SIGNALING	U	Intracellular trafficking, secretion, and vesicular transport	47
MAG1034	d__Bacteria;p__Gemmatimonadota;c__Gemmatimonadetes;o__Gemmatimonadales;f__Gemmatimonadaceae;g__UBA4720;s__Unclassified	CELLULAR PROCESSES AND SIGNALING	V	Defense mechanisms	87
MAG1034	d__Bacteria;p__Gemmatimonadota;c__Gemmatimonadetes;o__Gemmatimonadales;f__Gemmatimonadaceae;g__UBA4720;s__Unclassified	CELLULAR PROCESSES AND SIGNALING	W	Extracellular structures	26
MAG1034	d__Bacteria;p__Gemmatimonadota;c__Gemmatimonadetes;o__Gemmatimonadales;f__Gemmatimonadaceae;g__UBA4720;s__Unclassified	CELLULAR PROCESSES AND SIGNALING	X	Mobilome: prophages, transposons	10
MAG1034	d__Bacteria;p__Gemmatimonadota;c__Gemmatimonadetes;o__Gemmatimonadales;f__Gemmatimonadaceae;g__UBA4720;s__Unclassified	CELLULAR PROCESSES AND SIGNALING	Z	Cytoskeleton	6
MAG1034	d__Bacteria;p__Gemmatimonadota;c__Gemmatimonadetes;o__Gemmatimonadales;f__Gemmatimonadaceae;g__UBA4720;s__Unclassified	INFORMATION STORAGE AND PROCESSING	B	Chromatin structure and dynamics	1
MAG1034	d__Bacteria;p__Gemmatimonadota;c__Gemmatimonadetes;o__Gemmatimonadales;f__Gemmatimonadaceae;g__UBA4720;s__Unclassified	INFORMATION STORAGE AND PROCESSING	J	Translation, ribosomal structure and biogenesis	157
MAG1034	d__Bacteria;p__Gemmatimonadota;c__Gemmatimonadetes;o__Gemmatimonadales;f__Gemmatimonadaceae;g__UBA4720;s__Unclassified	INFORMATION STORAGE AND PROCESSING	K	Transcription	103
MAG1034	d__Bacteria;p__Gemmatimonadota;c__Gemmatimonadetes;o__Gemmatimonadales;f__Gemmatimonadaceae;g__UBA4720;s__Unclassified	INFORMATION STORAGE AND PROCESSING	L	Replication, recombination and repair	97
MAG1034	d__Bacteria;p__Gemmatimonadota;c__Gemmatimonadetes;o__Gemmatimonadales;f__Gemmatimonadaceae;g__UBA4720;s__Unclassified	METABOLISM	C	Energy production and conversion	137
MAG1034	d__Bacteria;p__Gemmatimonadota;c__Gemmatimonadetes;o__Gemmatimonadales;f__Gemmatimonadaceae;g__UBA4720;s__Unclassified	METABOLISM	E	Amino acid transport and metabolism	190
MAG1034	d__Bacteria;p__Gemmatimonadota;c__Gemmatimonadetes;o__Gemmatimonadales;f__Gemmatimonadaceae;g__UBA4720;s__Unclassified	METABOLISM	F	Nucleotide transport and metabolism	73
MAG1034	d__Bacteria;p__Gemmatimonadota;c__Gemmatimonadetes;o__Gemmatimonadales;f__Gemmatimonadaceae;g__UBA4720;s__Unclassified	METABOLISM	G	Carbohydrate transport and metabolism	114
MAG1034	d__Bacteria;p__Gemmatimonadota;c__Gemmatimonadetes;o__Gemmatimonadales;f__Gemmatimonadaceae;g__UBA4720;s__Unclassified	METABOLISM	H	Coenzyme transport and metabolism	111
MAG1034	d__Bacteria;p__Gemmatimonadota;c__Gemmatimonadetes;o__Gemmatimonadales;f__Gemmatimonadaceae;g__UBA4720;s__Unclassified	METABOLISM	I	Lipid transport and metabolism	119
MAG1034	d__Bacteria;p__Gemmatimonadota;c__Gemmatimonadetes;o__Gemmatimonadales;f__Gemmatimonadaceae;g__UBA4720;s__Unclassified	METABOLISM	P	Inorganic ion transport and metabolism	137
MAG1034	d__Bacteria;p__Gemmatimonadota;c__Gemmatimonadetes;o__Gemmatimonadales;f__Gemmatimonadaceae;g__UBA4720;s__Unclassified	METABOLISM	Q	Secondary metabolites biosynthesis, transport and catabolism	56
MAG1034	d__Bacteria;p__Gemmatimonadota;c__Gemmatimonadetes;o__Gemmatimonadales;f__Gemmatimonadaceae;g__UBA4720;s__Unclassified	POORLY CHARACTERIZED	R	General function prediction only	205
MAG1034	d__Bacteria;p__Gemmatimonadota;c__Gemmatimonadetes;o__Gemmatimonadales;f__Gemmatimonadaceae;g__UBA4720;s__Unclassified	POORLY CHARACTERIZED	S	Function unknown	62
MAG1036	d__Bacteria;p__Pseudomonadota;c__Gammaproteobacteria;o__Burkholderiales;f__Casimicrobiaceae;g__VBCG01;s__Unclassified	CELLULAR PROCESSES AND SIGNALING	D	Cell cycle control, cell division, chromosome partitioning	44
MAG1036	d__Bacteria;p__Pseudomonadota;c__Gammaproteobacteria;o__Burkholderiales;f__Casimicrobiaceae;g__VBCG01;s__Unclassified	CELLULAR PROCESSES AND SIGNALING	M	Cell wall/membrane/envelope biogenesis	246
MAG1036	d__Bacteria;p__Pseudomonadota;c__Gammaproteobacteria;o__Burkholderiales;f__Casimicrobiaceae;g__VBCG01;s__Unclassified	CELLULAR PROCESSES AND SIGNALING	N	Cell motility	93
MAG1036	d__Bacteria;p__Pseudomonadota;c__Gammaproteobacteria;o__Burkholderiales;f__Casimicrobiaceae;g__VBCG01;s__Unclassified	CELLULAR PROCESSES AND SIGNALING	O	Posttranslational modification, protein turnover, chaperones	186
MAG1036	d__Bacteria;p__Pseudomonadota;c__Gammaproteobacteria;o__Burkholderiales;f__Casimicrobiaceae;g__VBCG01;s__Unclassified	CELLULAR PROCESSES AND SIGNALING	T	Signal transduction mechanisms	179
MAG1036	d__Bacteria;p__Pseudomonadota;c__Gammaproteobacteria;o__Burkholderiales;f__Casimicrobiaceae;g__VBCG01;s__Unclassified	CELLULAR PROCESSES AND SIGNALING	U	Intracellular trafficking, secretion, and vesicular transport	47
MAG1036	d__Bacteria;p__Pseudomonadota;c__Gammaproteobacteria;o__Burkholderiales;f__Casimicrobiaceae;g__VBCG01;s__Unclassified	CELLULAR PROCESSES AND SIGNALING	V	Defense mechanisms	58
MAG1036	d__Bacteria;p__Pseudomonadota;c__Gammaproteobacteria;o__Burkholderiales;f__Casimicrobiaceae;g__VBCG01;s__Unclassified	CELLULAR PROCESSES AND SIGNALING	W	Extracellular structures	49
MAG1036	d__Bacteria;p__Pseudomonadota;c__Gammaproteobacteria;o__Burkholderiales;f__Casimicrobiaceae;g__VBCG01;s__Unclassified	CELLULAR PROCESSES AND SIGNALING	X	Mobilome: prophages, transposons	3
MAG1036	d__Bacteria;p__Pseudomonadota;c__Gammaproteobacteria;o__Burkholderiales;f__Casimicrobiaceae;g__VBCG01;s__Unclassified	CELLULAR PROCESSES AND SIGNALING	Z	Cytoskeleton	5
MAG1036	d__Bacteria;p__Pseudomonadota;c__Gammaproteobacteria;o__Burkholderiales;f__Casimicrobiaceae;g__VBCG01;s__Unclassified	INFORMATION STORAGE AND PROCESSING	A	RNA processing and modification	1
MAG1036	d__Bacteria;p__Pseudomonadota;c__Gammaproteobacteria;o__Burkholderiales;f__Casimicrobiaceae;g__VBCG01;s__Unclassified	INFORMATION STORAGE AND PROCESSING	B	Chromatin structure and dynamics	1
MAG1036	d__Bacteria;p__Pseudomonadota;c__Gammaproteobacteria;o__Burkholderiales;f__Casimicrobiaceae;g__VBCG01;s__Unclassified	INFORMATION STORAGE AND PROCESSING	J	Translation, ribosomal structure and biogenesis	193
MAG1036	d__Bacteria;p__Pseudomonadota;c__Gammaproteobacteria;o__Burkholderiales;f__Casimicrobiaceae;g__VBCG01;s__Unclassified	INFORMATION STORAGE AND PROCESSING	K	Transcription	165
MAG1036	d__Bacteria;p__Pseudomonadota;c__Gammaproteobacteria;o__Burkholderiales;f__Casimicrobiaceae;g__VBCG01;s__Unclassified	INFORMATION STORAGE AND PROCESSING	L	Replication, recombination and repair	113
MAG1036	d__Bacteria;p__Pseudomonadota;c__Gammaproteobacteria;o__Burkholderiales;f__Casimicrobiaceae;g__VBCG01;s__Unclassified	METABOLISM	C	Energy production and conversion	293
MAG1036	d__Bacteria;p__Pseudomonadota;c__Gammaproteobacteria;o__Burkholderiales;f__Casimicrobiaceae;g__VBCG01;s__Unclassified	METABOLISM	E	Amino acid transport and metabolism	377
MAG1036	d__Bacteria;p__Pseudomonadota;c__Gammaproteobacteria;o__Burkholderiales;f__Casimicrobiaceae;g__VBCG01;s__Unclassified	METABOLISM	F	Nucleotide transport and metabolism	70
MAG1036	d__Bacteria;p__Pseudomonadota;c__Gammaproteobacteria;o__Burkholderiales;f__Casimicrobiaceae;g__VBCG01;s__Unclassified	METABOLISM	G	Carbohydrate transport and metabolism	243
MAG1036	d__Bacteria;p__Pseudomonadota;c__Gammaproteobacteria;o__Burkholderiales;f__Casimicrobiaceae;g__VBCG01;s__Unclassified	METABOLISM	H	Coenzyme transport and metabolism	197
MAG1036	d__Bacteria;p__Pseudomonadota;c__Gammaproteobacteria;o__Burkholderiales;f__Casimicrobiaceae;g__VBCG01;s__Unclassified	METABOLISM	I	Lipid transport and metabolism	234
MAG1036	d__Bacteria;p__Pseudomonadota;c__Gammaproteobacteria;o__Burkholderiales;f__Casimicrobiaceae;g__VBCG01;s__Unclassified	METABOLISM	P	Inorganic ion transport and metabolism	203
MAG1036	d__Bacteria;p__Pseudomonadota;c__Gammaproteobacteria;o__Burkholderiales;f__Casimicrobiaceae;g__VBCG01;s__Unclassified	METABOLISM	Q	Secondary metabolites biosynthesis, transport and catabolism	86
MAG1036	d__Bacteria;p__Pseudomonadota;c__Gammaproteobacteria;o__Burkholderiales;f__Casimicrobiaceae;g__VBCG01;s__Unclassified	POORLY CHARACTERIZED	R	General function prediction only	291
MAG1036	d__Bacteria;p__Pseudomonadota;c__Gammaproteobacteria;o__Burkholderiales;f__Casimicrobiaceae;g__VBCG01;s__Unclassified	POORLY CHARACTERIZED	S	Function unknown	108
MAG1039	d__Bacteria;p__Actinomycetota;c__Thermoleophilia;o__Solirubrobacterales;f__Solirubrobacteraceae;g__Unclassified;s__Unclassified	CELLULAR PROCESSES AND SIGNALING	D	Cell cycle control, cell division, chromosome partitioning	58
MAG1039	d__Bacteria;p__Actinomycetota;c__Thermoleophilia;o__Solirubrobacterales;f__Solirubrobacteraceae;g__Unclassified;s__Unclassified	CELLULAR PROCESSES AND SIGNALING	M	Cell wall/membrane/envelope biogenesis	273
MAG1039	d__Bacteria;p__Actinomycetota;c__Thermoleophilia;o__Solirubrobacterales;f__Solirubrobacteraceae;g__Unclassified;s__Unclassified	CELLULAR PROCESSES AND SIGNALING	N	Cell motility	36
MAG1039	d__Bacteria;p__Actinomycetota;c__Thermoleophilia;o__Solirubrobacterales;f__Solirubrobacteraceae;g__Unclassified;s__Unclassified	CELLULAR PROCESSES AND SIGNALING	O	Posttranslational modification, protein turnover, chaperones	175
MAG1039	d__Bacteria;p__Actinomycetota;c__Thermoleophilia;o__Solirubrobacterales;f__Solirubrobacteraceae;g__Unclassified;s__Unclassified	CELLULAR PROCESSES AND SIGNALING	T	Signal transduction mechanisms	379
MAG1039	d__Bacteria;p__Actinomycetota;c__Thermoleophilia;o__Solirubrobacterales;f__Solirubrobacteraceae;g__Unclassified;s__Unclassified	CELLULAR PROCESSES AND SIGNALING	U	Intracellular trafficking, secretion, and vesicular transport	33
MAG1039	d__Bacteria;p__Actinomycetota;c__Thermoleophilia;o__Solirubrobacterales;f__Solirubrobacteraceae;g__Unclassified;s__Unclassified	CELLULAR PROCESSES AND SIGNALING	V	Defense mechanisms	70
MAG1039	d__Bacteria;p__Actinomycetota;c__Thermoleophilia;o__Solirubrobacterales;f__Solirubrobacteraceae;g__Unclassified;s__Unclassified	CELLULAR PROCESSES AND SIGNALING	W	Extracellular structures	12
MAG1039	d__Bacteria;p__Actinomycetota;c__Thermoleophilia;o__Solirubrobacterales;f__Solirubrobacteraceae;g__Unclassified;s__Unclassified	CELLULAR PROCESSES AND SIGNALING	X	Mobilome: prophages, transposons	5
MAG1039	d__Bacteria;p__Actinomycetota;c__Thermoleophilia;o__Solirubrobacterales;f__Solirubrobacteraceae;g__Unclassified;s__Unclassified	CELLULAR PROCESSES AND SIGNALING	Z	Cytoskeleton	4
MAG1039	d__Bacteria;p__Actinomycetota;c__Thermoleophilia;o__Solirubrobacterales;f__Solirubrobacteraceae;g__Unclassified;s__Unclassified	INFORMATION STORAGE AND PROCESSING	J	Translation, ribosomal structure and biogenesis	165
MAG1039	d__Bacteria;p__Actinomycetota;c__Thermoleophilia;o__Solirubrobacterales;f__Solirubrobacteraceae;g__Unclassified;s__Unclassified	INFORMATION STORAGE AND PROCESSING	K	Transcription	331
MAG1039	d__Bacteria;p__Actinomycetota;c__Thermoleophilia;o__Solirubrobacterales;f__Solirubrobacteraceae;g__Unclassified;s__Unclassified	INFORMATION STORAGE AND PROCESSING	L	Replication, recombination and repair	141
MAG1039	d__Bacteria;p__Actinomycetota;c__Thermoleophilia;o__Solirubrobacterales;f__Solirubrobacteraceae;g__Unclassified;s__Unclassified	METABOLISM	C	Energy production and conversion	216
MAG1039	d__Bacteria;p__Actinomycetota;c__Thermoleophilia;o__Solirubrobacterales;f__Solirubrobacteraceae;g__Unclassified;s__Unclassified	METABOLISM	E	Amino acid transport and metabolism	324
MAG1039	d__Bacteria;p__Actinomycetota;c__Thermoleophilia;o__Solirubrobacterales;f__Solirubrobacteraceae;g__Unclassified;s__Unclassified	METABOLISM	F	Nucleotide transport and metabolism	83
MAG1039	d__Bacteria;p__Actinomycetota;c__Thermoleophilia;o__Solirubrobacterales;f__Solirubrobacteraceae;g__Unclassified;s__Unclassified	METABOLISM	G	Carbohydrate transport and metabolism	234
MAG1039	d__Bacteria;p__Actinomycetota;c__Thermoleophilia;o__Solirubrobacterales;f__Solirubrobacteraceae;g__Unclassified;s__Unclassified	METABOLISM	H	Coenzyme transport and metabolism	258
MAG1039	d__Bacteria;p__Actinomycetota;c__Thermoleophilia;o__Solirubrobacterales;f__Solirubrobacteraceae;g__Unclassified;s__Unclassified	METABOLISM	I	Lipid transport and metabolism	250
MAG1039	d__Bacteria;p__Actinomycetota;c__Thermoleophilia;o__Solirubrobacterales;f__Solirubrobacteraceae;g__Unclassified;s__Unclassified	METABOLISM	P	Inorganic ion transport and metabolism	156
MAG1039	d__Bacteria;p__Actinomycetota;c__Thermoleophilia;o__Solirubrobacterales;f__Solirubrobacteraceae;g__Unclassified;s__Unclassified	METABOLISM	Q	Secondary metabolites biosynthesis, transport and catabolism	84
MAG1039	d__Bacteria;p__Actinomycetota;c__Thermoleophilia;o__Solirubrobacterales;f__Solirubrobacteraceae;g__Unclassified;s__Unclassified	POORLY CHARACTERIZED	R	General function prediction only	367
MAG1039	d__Bacteria;p__Actinomycetota;c__Thermoleophilia;o__Solirubrobacterales;f__Solirubrobacteraceae;g__Unclassified;s__Unclassified	POORLY CHARACTERIZED	S	Function unknown	120
MAG104	d__Bacteria;p__Pseudomonadota;c__Gammaproteobacteria;o__Burkholderiales;f__Casimicrobiaceae;g__VBCG01;s__Unclassified	CELLULAR PROCESSES AND SIGNALING	D	Cell cycle control, cell division, chromosome partitioning	42
MAG104	d__Bacteria;p__Pseudomonadota;c__Gammaproteobacteria;o__Burkholderiales;f__Casimicrobiaceae;g__VBCG01;s__Unclassified	CELLULAR PROCESSES AND SIGNALING	M	Cell wall/membrane/envelope biogenesis	264
MAG104	d__Bacteria;p__Pseudomonadota;c__Gammaproteobacteria;o__Burkholderiales;f__Casimicrobiaceae;g__VBCG01;s__Unclassified	CELLULAR PROCESSES AND SIGNALING	N	Cell motility	38
MAG104	d__Bacteria;p__Pseudomonadota;c__Gammaproteobacteria;o__Burkholderiales;f__Casimicrobiaceae;g__VBCG01;s__Unclassified	CELLULAR PROCESSES AND SIGNALING	O	Posttranslational modification, protein turnover, chaperones	219
MAG104	d__Bacteria;p__Pseudomonadota;c__Gammaproteobacteria;o__Burkholderiales;f__Casimicrobiaceae;g__VBCG01;s__Unclassified	CELLULAR PROCESSES AND SIGNALING	T	Signal transduction mechanisms	247
MAG104	d__Bacteria;p__Pseudomonadota;c__Gammaproteobacteria;o__Burkholderiales;f__Casimicrobiaceae;g__VBCG01;s__Unclassified	CELLULAR PROCESSES AND SIGNALING	U	Intracellular trafficking, secretion, and vesicular transport	44
MAG104	d__Bacteria;p__Pseudomonadota;c__Gammaproteobacteria;o__Burkholderiales;f__Casimicrobiaceae;g__VBCG01;s__Unclassified	CELLULAR PROCESSES AND SIGNALING	V	Defense mechanisms	87
MAG104	d__Bacteria;p__Pseudomonadota;c__Gammaproteobacteria;o__Burkholderiales;f__Casimicrobiaceae;g__VBCG01;s__Unclassified	CELLULAR PROCESSES AND SIGNALING	W	Extracellular structures	35
MAG104	d__Bacteria;p__Pseudomonadota;c__Gammaproteobacteria;o__Burkholderiales;f__Casimicrobiaceae;g__VBCG01;s__Unclassified	CELLULAR PROCESSES AND SIGNALING	X	Mobilome: prophages, transposons	8
MAG104	d__Bacteria;p__Pseudomonadota;c__Gammaproteobacteria;o__Burkholderiales;f__Casimicrobiaceae;g__VBCG01;s__Unclassified	CELLULAR PROCESSES AND SIGNALING	Z	Cytoskeleton	5
MAG104	d__Bacteria;p__Pseudomonadota;c__Gammaproteobacteria;o__Burkholderiales;f__Casimicrobiaceae;g__VBCG01;s__Unclassified	INFORMATION STORAGE AND PROCESSING	A	RNA processing and modification	1
MAG104	d__Bacteria;p__Pseudomonadota;c__Gammaproteobacteria;o__Burkholderiales;f__Casimicrobiaceae;g__VBCG01;s__Unclassified	INFORMATION STORAGE AND PROCESSING	B	Chromatin structure and dynamics	1
MAG104	d__Bacteria;p__Pseudomonadota;c__Gammaproteobacteria;o__Burkholderiales;f__Casimicrobiaceae;g__VBCG01;s__Unclassified	INFORMATION STORAGE AND PROCESSING	J	Translation, ribosomal structure and biogenesis	229
MAG104	d__Bacteria;p__Pseudomonadota;c__Gammaproteobacteria;o__Burkholderiales;f__Casimicrobiaceae;g__VBCG01;s__Unclassified	INFORMATION STORAGE AND PROCESSING	K	Transcription	212
MAG104	d__Bacteria;p__Pseudomonadota;c__Gammaproteobacteria;o__Burkholderiales;f__Casimicrobiaceae;g__VBCG01;s__Unclassified	INFORMATION STORAGE AND PROCESSING	L	Replication, recombination and repair	115
MAG104	d__Bacteria;p__Pseudomonadota;c__Gammaproteobacteria;o__Burkholderiales;f__Casimicrobiaceae;g__VBCG01;s__Unclassified	METABOLISM	C	Energy production and conversion	296
MAG104	d__Bacteria;p__Pseudomonadota;c__Gammaproteobacteria;o__Burkholderiales;f__Casimicrobiaceae;g__VBCG01;s__Unclassified	METABOLISM	E	Amino acid transport and metabolism	396
MAG104	d__Bacteria;p__Pseudomonadota;c__Gammaproteobacteria;o__Burkholderiales;f__Casimicrobiaceae;g__VBCG01;s__Unclassified	METABOLISM	F	Nucleotide transport and metabolism	90
MAG104	d__Bacteria;p__Pseudomonadota;c__Gammaproteobacteria;o__Burkholderiales;f__Casimicrobiaceae;g__VBCG01;s__Unclassified	METABOLISM	G	Carbohydrate transport and metabolism	272
MAG104	d__Bacteria;p__Pseudomonadota;c__Gammaproteobacteria;o__Burkholderiales;f__Casimicrobiaceae;g__VBCG01;s__Unclassified	METABOLISM	H	Coenzyme transport and metabolism	217
MAG104	d__Bacteria;p__Pseudomonadota;c__Gammaproteobacteria;o__Burkholderiales;f__Casimicrobiaceae;g__VBCG01;s__Unclassified	METABOLISM	I	Lipid transport and metabolism	268
MAG104	d__Bacteria;p__Pseudomonadota;c__Gammaproteobacteria;o__Burkholderiales;f__Casimicrobiaceae;g__VBCG01;s__Unclassified	METABOLISM	P	Inorganic ion transport and metabolism	259
MAG104	d__Bacteria;p__Pseudomonadota;c__Gammaproteobacteria;o__Burkholderiales;f__Casimicrobiaceae;g__VBCG01;s__Unclassified	METABOLISM	Q	Secondary metabolites biosynthesis, transport and catabolism	103
MAG104	d__Bacteria;p__Pseudomonadota;c__Gammaproteobacteria;o__Burkholderiales;f__Casimicrobiaceae;g__VBCG01;s__Unclassified	POORLY CHARACTERIZED	R	General function prediction only	327
MAG104	d__Bacteria;p__Pseudomonadota;c__Gammaproteobacteria;o__Burkholderiales;f__Casimicrobiaceae;g__VBCG01;s__Unclassified	POORLY CHARACTERIZED	S	Function unknown	127
MAG1041	d__Bacteria;p__Actinomycetota;c__Actinomycetia;o__Actinomycetales;f__Actinomycetaceae;g__KH17;s__Unclassified	CELLULAR PROCESSES AND SIGNALING	D	Cell cycle control, cell division, chromosome partitioning	25
MAG1041	d__Bacteria;p__Actinomycetota;c__Actinomycetia;o__Actinomycetales;f__Actinomycetaceae;g__KH17;s__Unclassified	CELLULAR PROCESSES AND SIGNALING	M	Cell wall/membrane/envelope biogenesis	66
MAG1041	d__Bacteria;p__Actinomycetota;c__Actinomycetia;o__Actinomycetales;f__Actinomycetaceae;g__KH17;s__Unclassified	CELLULAR PROCESSES AND SIGNALING	N	Cell motility	3
MAG1041	d__Bacteria;p__Actinomycetota;c__Actinomycetia;o__Actinomycetales;f__Actinomycetaceae;g__KH17;s__Unclassified	CELLULAR PROCESSES AND SIGNALING	O	Posttranslational modification, protein turnover, chaperones	99
MAG1041	d__Bacteria;p__Actinomycetota;c__Actinomycetia;o__Actinomycetales;f__Actinomycetaceae;g__KH17;s__Unclassified	CELLULAR PROCESSES AND SIGNALING	T	Signal transduction mechanisms	66
MAG1041	d__Bacteria;p__Actinomycetota;c__Actinomycetia;o__Actinomycetales;f__Actinomycetaceae;g__KH17;s__Unclassified	CELLULAR PROCESSES AND SIGNALING	U	Intracellular trafficking, secretion, and vesicular transport	25
MAG1041	d__Bacteria;p__Actinomycetota;c__Actinomycetia;o__Actinomycetales;f__Actinomycetaceae;g__KH17;s__Unclassified	CELLULAR PROCESSES AND SIGNALING	V	Defense mechanisms	51
MAG1041	d__Bacteria;p__Actinomycetota;c__Actinomycetia;o__Actinomycetales;f__Actinomycetaceae;g__KH17;s__Unclassified	CELLULAR PROCESSES AND SIGNALING	W	Extracellular structures	6
MAG1041	d__Bacteria;p__Actinomycetota;c__Actinomycetia;o__Actinomycetales;f__Actinomycetaceae;g__KH17;s__Unclassified	CELLULAR PROCESSES AND SIGNALING	X	Mobilome: prophages, transposons	8
MAG1041	d__Bacteria;p__Actinomycetota;c__Actinomycetia;o__Actinomycetales;f__Actinomycetaceae;g__KH17;s__Unclassified	INFORMATION STORAGE AND PROCESSING	J	Translation, ribosomal structure and biogenesis	156
MAG1041	d__Bacteria;p__Actinomycetota;c__Actinomycetia;o__Actinomycetales;f__Actinomycetaceae;g__KH17;s__Unclassified	INFORMATION STORAGE AND PROCESSING	K	Transcription	113
MAG1041	d__Bacteria;p__Actinomycetota;c__Actinomycetia;o__Actinomycetales;f__Actinomycetaceae;g__KH17;s__Unclassified	INFORMATION STORAGE AND PROCESSING	L	Replication, recombination and repair	86
MAG1041	d__Bacteria;p__Actinomycetota;c__Actinomycetia;o__Actinomycetales;f__Actinomycetaceae;g__KH17;s__Unclassified	METABOLISM	C	Energy production and conversion	107
MAG1041	d__Bacteria;p__Actinomycetota;c__Actinomycetia;o__Actinomycetales;f__Actinomycetaceae;g__KH17;s__Unclassified	METABOLISM	E	Amino acid transport and metabolism	162
MAG1041	d__Bacteria;p__Actinomycetota;c__Actinomycetia;o__Actinomycetales;f__Actinomycetaceae;g__KH17;s__Unclassified	METABOLISM	F	Nucleotide transport and metabolism	59
MAG1041	d__Bacteria;p__Actinomycetota;c__Actinomycetia;o__Actinomycetales;f__Actinomycetaceae;g__KH17;s__Unclassified	METABOLISM	G	Carbohydrate transport and metabolism	190
MAG1041	d__Bacteria;p__Actinomycetota;c__Actinomycetia;o__Actinomycetales;f__Actinomycetaceae;g__KH17;s__Unclassified	METABOLISM	H	Coenzyme transport and metabolism	81
MAG1041	d__Bacteria;p__Actinomycetota;c__Actinomycetia;o__Actinomycetales;f__Actinomycetaceae;g__KH17;s__Unclassified	METABOLISM	I	Lipid transport and metabolism	74
MAG1041	d__Bacteria;p__Actinomycetota;c__Actinomycetia;o__Actinomycetales;f__Actinomycetaceae;g__KH17;s__Unclassified	METABOLISM	P	Inorganic ion transport and metabolism	89
MAG1041	d__Bacteria;p__Actinomycetota;c__Actinomycetia;o__Actinomycetales;f__Actinomycetaceae;g__KH17;s__Unclassified	METABOLISM	Q	Secondary metabolites biosynthesis, transport and catabolism	13
MAG1041	d__Bacteria;p__Actinomycetota;c__Actinomycetia;o__Actinomycetales;f__Actinomycetaceae;g__KH17;s__Unclassified	POORLY CHARACTERIZED	R	General function prediction only	110
MAG1041	d__Bacteria;p__Actinomycetota;c__Actinomycetia;o__Actinomycetales;f__Actinomycetaceae;g__KH17;s__Unclassified	POORLY CHARACTERIZED	S	Function unknown	45
MAG1043	d__Bacteria;p__Actinomycetota;c__Acidimicrobiia;o__Acidimicrobiales;f__AC-14;g__CADCTB01;s__Unclassified	CELLULAR PROCESSES AND SIGNALING	D	Cell cycle control, cell division, chromosome partitioning	56
MAG1043	d__Bacteria;p__Actinomycetota;c__Acidimicrobiia;o__Acidimicrobiales;f__AC-14;g__CADCTB01;s__Unclassified	CELLULAR PROCESSES AND SIGNALING	M	Cell wall/membrane/envelope biogenesis	206
MAG1043	d__Bacteria;p__Actinomycetota;c__Acidimicrobiia;o__Acidimicrobiales;f__AC-14;g__CADCTB01;s__Unclassified	CELLULAR PROCESSES AND SIGNALING	N	Cell motility	11
MAG1043	d__Bacteria;p__Actinomycetota;c__Acidimicrobiia;o__Acidimicrobiales;f__AC-14;g__CADCTB01;s__Unclassified	CELLULAR PROCESSES AND SIGNALING	O	Posttranslational modification, protein turnover, chaperones	168
MAG1043	d__Bacteria;p__Actinomycetota;c__Acidimicrobiia;o__Acidimicrobiales;f__AC-14;g__CADCTB01;s__Unclassified	CELLULAR PROCESSES AND SIGNALING	T	Signal transduction mechanisms	231
MAG1043	d__Bacteria;p__Actinomycetota;c__Acidimicrobiia;o__Acidimicrobiales;f__AC-14;g__CADCTB01;s__Unclassified	CELLULAR PROCESSES AND SIGNALING	U	Intracellular trafficking, secretion, and vesicular transport	47
MAG1043	d__Bacteria;p__Actinomycetota;c__Acidimicrobiia;o__Acidimicrobiales;f__AC-14;g__CADCTB01;s__Unclassified	CELLULAR PROCESSES AND SIGNALING	V	Defense mechanisms	83
MAG1043	d__Bacteria;p__Actinomycetota;c__Acidimicrobiia;o__Acidimicrobiales;f__AC-14;g__CADCTB01;s__Unclassified	CELLULAR PROCESSES AND SIGNALING	W	Extracellular structures	22
MAG1043	d__Bacteria;p__Actinomycetota;c__Acidimicrobiia;o__Acidimicrobiales;f__AC-14;g__CADCTB01;s__Unclassified	CELLULAR PROCESSES AND SIGNALING	X	Mobilome: prophages, transposons	23
MAG1043	d__Bacteria;p__Actinomycetota;c__Acidimicrobiia;o__Acidimicrobiales;f__AC-14;g__CADCTB01;s__Unclassified	CELLULAR PROCESSES AND SIGNALING	Z	Cytoskeleton	8
MAG1043	d__Bacteria;p__Actinomycetota;c__Acidimicrobiia;o__Acidimicrobiales;f__AC-14;g__CADCTB01;s__Unclassified	INFORMATION STORAGE AND PROCESSING	A	RNA processing and modification	1
MAG1043	d__Bacteria;p__Actinomycetota;c__Acidimicrobiia;o__Acidimicrobiales;f__AC-14;g__CADCTB01;s__Unclassified	INFORMATION STORAGE AND PROCESSING	J	Translation, ribosomal structure and biogenesis	178
MAG1043	d__Bacteria;p__Actinomycetota;c__Acidimicrobiia;o__Acidimicrobiales;f__AC-14;g__CADCTB01;s__Unclassified	INFORMATION STORAGE AND PROCESSING	K	Transcription	246
MAG1043	d__Bacteria;p__Actinomycetota;c__Acidimicrobiia;o__Acidimicrobiales;f__AC-14;g__CADCTB01;s__Unclassified	INFORMATION STORAGE AND PROCESSING	L	Replication, recombination and repair	128
MAG1043	d__Bacteria;p__Actinomycetota;c__Acidimicrobiia;o__Acidimicrobiales;f__AC-14;g__CADCTB01;s__Unclassified	METABOLISM	C	Energy production and conversion	185
MAG1043	d__Bacteria;p__Actinomycetota;c__Acidimicrobiia;o__Acidimicrobiales;f__AC-14;g__CADCTB01;s__Unclassified	METABOLISM	E	Amino acid transport and metabolism	218
MAG1043	d__Bacteria;p__Actinomycetota;c__Acidimicrobiia;o__Acidimicrobiales;f__AC-14;g__CADCTB01;s__Unclassified	METABOLISM	F	Nucleotide transport and metabolism	69
MAG1043	d__Bacteria;p__Actinomycetota;c__Acidimicrobiia;o__Acidimicrobiales;f__AC-14;g__CADCTB01;s__Unclassified	METABOLISM	G	Carbohydrate transport and metabolism	181
MAG1043	d__Bacteria;p__Actinomycetota;c__Acidimicrobiia;o__Acidimicrobiales;f__AC-14;g__CADCTB01;s__Unclassified	METABOLISM	H	Coenzyme transport and metabolism	211
MAG1043	d__Bacteria;p__Actinomycetota;c__Acidimicrobiia;o__Acidimicrobiales;f__AC-14;g__CADCTB01;s__Unclassified	METABOLISM	I	Lipid transport and metabolism	107
MAG1043	d__Bacteria;p__Actinomycetota;c__Acidimicrobiia;o__Acidimicrobiales;f__AC-14;g__CADCTB01;s__Unclassified	METABOLISM	P	Inorganic ion transport and metabolism	152
MAG1043	d__Bacteria;p__Actinomycetota;c__Acidimicrobiia;o__Acidimicrobiales;f__AC-14;g__CADCTB01;s__Unclassified	METABOLISM	Q	Secondary metabolites biosynthesis, transport and catabolism	55
MAG1043	d__Bacteria;p__Actinomycetota;c__Acidimicrobiia;o__Acidimicrobiales;f__AC-14;g__CADCTB01;s__Unclassified	POORLY CHARACTERIZED	R	General function prediction only	224
MAG1043	d__Bacteria;p__Actinomycetota;c__Acidimicrobiia;o__Acidimicrobiales;f__AC-14;g__CADCTB01;s__Unclassified	POORLY CHARACTERIZED	S	Function unknown	86
MAG1049	d__Bacteria;p__Actinomycetota;c__Acidimicrobiia;o__Acidimicrobiales;f__JADJXE01;g__Unclassified;s__Unclassified	CELLULAR PROCESSES AND SIGNALING	D	Cell cycle control, cell division, chromosome partitioning	31
MAG1049	d__Bacteria;p__Actinomycetota;c__Acidimicrobiia;o__Acidimicrobiales;f__JADJXE01;g__Unclassified;s__Unclassified	CELLULAR PROCESSES AND SIGNALING	M	Cell wall/membrane/envelope biogenesis	155
MAG1049	d__Bacteria;p__Actinomycetota;c__Acidimicrobiia;o__Acidimicrobiales;f__JADJXE01;g__Unclassified;s__Unclassified	CELLULAR PROCESSES AND SIGNALING	N	Cell motility	14
MAG1049	d__Bacteria;p__Actinomycetota;c__Acidimicrobiia;o__Acidimicrobiales;f__JADJXE01;g__Unclassified;s__Unclassified	CELLULAR PROCESSES AND SIGNALING	O	Posttranslational modification, protein turnover, chaperones	129
MAG1049	d__Bacteria;p__Actinomycetota;c__Acidimicrobiia;o__Acidimicrobiales;f__JADJXE01;g__Unclassified;s__Unclassified	CELLULAR PROCESSES AND SIGNALING	T	Signal transduction mechanisms	149
MAG1049	d__Bacteria;p__Actinomycetota;c__Acidimicrobiia;o__Acidimicrobiales;f__JADJXE01;g__Unclassified;s__Unclassified	CELLULAR PROCESSES AND SIGNALING	U	Intracellular trafficking, secretion, and vesicular transport	28
MAG1049	d__Bacteria;p__Actinomycetota;c__Acidimicrobiia;o__Acidimicrobiales;f__JADJXE01;g__Unclassified;s__Unclassified	CELLULAR PROCESSES AND SIGNALING	V	Defense mechanisms	91
MAG1049	d__Bacteria;p__Actinomycetota;c__Acidimicrobiia;o__Acidimicrobiales;f__JADJXE01;g__Unclassified;s__Unclassified	CELLULAR PROCESSES AND SIGNALING	W	Extracellular structures	14
MAG1049	d__Bacteria;p__Actinomycetota;c__Acidimicrobiia;o__Acidimicrobiales;f__JADJXE01;g__Unclassified;s__Unclassified	CELLULAR PROCESSES AND SIGNALING	X	Mobilome: prophages, transposons	4
MAG1049	d__Bacteria;p__Actinomycetota;c__Acidimicrobiia;o__Acidimicrobiales;f__JADJXE01;g__Unclassified;s__Unclassified	CELLULAR PROCESSES AND SIGNALING	Z	Cytoskeleton	2
MAG1049	d__Bacteria;p__Actinomycetota;c__Acidimicrobiia;o__Acidimicrobiales;f__JADJXE01;g__Unclassified;s__Unclassified	INFORMATION STORAGE AND PROCESSING	A	RNA processing and modification	1
MAG1049	d__Bacteria;p__Actinomycetota;c__Acidimicrobiia;o__Acidimicrobiales;f__JADJXE01;g__Unclassified;s__Unclassified	INFORMATION STORAGE AND PROCESSING	J	Translation, ribosomal structure and biogenesis	207
MAG1049	d__Bacteria;p__Actinomycetota;c__Acidimicrobiia;o__Acidimicrobiales;f__JADJXE01;g__Unclassified;s__Unclassified	INFORMATION STORAGE AND PROCESSING	K	Transcription	211
MAG1049	d__Bacteria;p__Actinomycetota;c__Acidimicrobiia;o__Acidimicrobiales;f__JADJXE01;g__Unclassified;s__Unclassified	INFORMATION STORAGE AND PROCESSING	L	Replication, recombination and repair	117
MAG1049	d__Bacteria;p__Actinomycetota;c__Acidimicrobiia;o__Acidimicrobiales;f__JADJXE01;g__Unclassified;s__Unclassified	METABOLISM	C	Energy production and conversion	237
MAG1049	d__Bacteria;p__Actinomycetota;c__Acidimicrobiia;o__Acidimicrobiales;f__JADJXE01;g__Unclassified;s__Unclassified	METABOLISM	E	Amino acid transport and metabolism	298
MAG1049	d__Bacteria;p__Actinomycetota;c__Acidimicrobiia;o__Acidimicrobiales;f__JADJXE01;g__Unclassified;s__Unclassified	METABOLISM	F	Nucleotide transport and metabolism	98
MAG1049	d__Bacteria;p__Actinomycetota;c__Acidimicrobiia;o__Acidimicrobiales;f__JADJXE01;g__Unclassified;s__Unclassified	METABOLISM	G	Carbohydrate transport and metabolism	199
MAG1049	d__Bacteria;p__Actinomycetota;c__Acidimicrobiia;o__Acidimicrobiales;f__JADJXE01;g__Unclassified;s__Unclassified	METABOLISM	H	Coenzyme transport and metabolism	276
MAG1049	d__Bacteria;p__Actinomycetota;c__Acidimicrobiia;o__Acidimicrobiales;f__JADJXE01;g__Unclassified;s__Unclassified	METABOLISM	I	Lipid transport and metabolism	271
MAG1049	d__Bacteria;p__Actinomycetota;c__Acidimicrobiia;o__Acidimicrobiales;f__JADJXE01;g__Unclassified;s__Unclassified	METABOLISM	P	Inorganic ion transport and metabolism	157
MAG1049	d__Bacteria;p__Actinomycetota;c__Acidimicrobiia;o__Acidimicrobiales;f__JADJXE01;g__Unclassified;s__Unclassified	METABOLISM	Q	Secondary metabolites biosynthesis, transport and catabolism	133
MAG1049	d__Bacteria;p__Actinomycetota;c__Acidimicrobiia;o__Acidimicrobiales;f__JADJXE01;g__Unclassified;s__Unclassified	POORLY CHARACTERIZED	R	General function prediction only	357
MAG1049	d__Bacteria;p__Actinomycetota;c__Acidimicrobiia;o__Acidimicrobiales;f__JADJXE01;g__Unclassified;s__Unclassified	POORLY CHARACTERIZED	S	Function unknown	76
MAG1053	d__Archaea;p__Thermoproteota;c__Nitrososphaeria;o__Nitrososphaerales;f__Nitrososphaeraceae;g__Nitrosocosmicus;s__Nitrosocosmicus oleophilus	CELLULAR PROCESSES AND SIGNALING	D	Cell cycle control, cell division, chromosome partitioning	45
MAG1053	d__Archaea;p__Thermoproteota;c__Nitrososphaeria;o__Nitrososphaerales;f__Nitrososphaeraceae;g__Nitrosocosmicus;s__Nitrosocosmicus oleophilus	CELLULAR PROCESSES AND SIGNALING	M	Cell wall/membrane/envelope biogenesis	74
MAG1053	d__Archaea;p__Thermoproteota;c__Nitrososphaeria;o__Nitrososphaerales;f__Nitrososphaeraceae;g__Nitrosocosmicus;s__Nitrosocosmicus oleophilus	CELLULAR PROCESSES AND SIGNALING	N	Cell motility	9
MAG1053	d__Archaea;p__Thermoproteota;c__Nitrososphaeria;o__Nitrososphaerales;f__Nitrososphaeraceae;g__Nitrosocosmicus;s__Nitrosocosmicus oleophilus	CELLULAR PROCESSES AND SIGNALING	O	Posttranslational modification, protein turnover, chaperones	93
MAG1053	d__Archaea;p__Thermoproteota;c__Nitrososphaeria;o__Nitrososphaerales;f__Nitrososphaeraceae;g__Nitrosocosmicus;s__Nitrosocosmicus oleophilus	CELLULAR PROCESSES AND SIGNALING	T	Signal transduction mechanisms	126
MAG1053	d__Archaea;p__Thermoproteota;c__Nitrososphaeria;o__Nitrososphaerales;f__Nitrososphaeraceae;g__Nitrosocosmicus;s__Nitrosocosmicus oleophilus	CELLULAR PROCESSES AND SIGNALING	U	Intracellular trafficking, secretion, and vesicular transport	15
MAG1053	d__Archaea;p__Thermoproteota;c__Nitrososphaeria;o__Nitrososphaerales;f__Nitrososphaeraceae;g__Nitrosocosmicus;s__Nitrosocosmicus oleophilus	CELLULAR PROCESSES AND SIGNALING	V	Defense mechanisms	34
MAG1053	d__Archaea;p__Thermoproteota;c__Nitrososphaeria;o__Nitrososphaerales;f__Nitrososphaeraceae;g__Nitrosocosmicus;s__Nitrosocosmicus oleophilus	CELLULAR PROCESSES AND SIGNALING	W	Extracellular structures	2
MAG1053	d__Archaea;p__Thermoproteota;c__Nitrososphaeria;o__Nitrososphaerales;f__Nitrososphaeraceae;g__Nitrosocosmicus;s__Nitrosocosmicus oleophilus	CELLULAR PROCESSES AND SIGNALING	X	Mobilome: prophages, transposons	6
MAG1053	d__Archaea;p__Thermoproteota;c__Nitrososphaeria;o__Nitrososphaerales;f__Nitrososphaeraceae;g__Nitrosocosmicus;s__Nitrosocosmicus oleophilus	INFORMATION STORAGE AND PROCESSING	A	RNA processing and modification	1
MAG1053	d__Archaea;p__Thermoproteota;c__Nitrososphaeria;o__Nitrososphaerales;f__Nitrososphaeraceae;g__Nitrosocosmicus;s__Nitrosocosmicus oleophilus	INFORMATION STORAGE AND PROCESSING	B	Chromatin structure and dynamics	1
MAG1053	d__Archaea;p__Thermoproteota;c__Nitrososphaeria;o__Nitrososphaerales;f__Nitrososphaeraceae;g__Nitrosocosmicus;s__Nitrosocosmicus oleophilus	INFORMATION STORAGE AND PROCESSING	J	Translation, ribosomal structure and biogenesis	204
MAG1053	d__Archaea;p__Thermoproteota;c__Nitrososphaeria;o__Nitrososphaerales;f__Nitrososphaeraceae;g__Nitrosocosmicus;s__Nitrosocosmicus oleophilus	INFORMATION STORAGE AND PROCESSING	K	Transcription	100
MAG1053	d__Archaea;p__Thermoproteota;c__Nitrososphaeria;o__Nitrososphaerales;f__Nitrososphaeraceae;g__Nitrosocosmicus;s__Nitrosocosmicus oleophilus	INFORMATION STORAGE AND PROCESSING	L	Replication, recombination and repair	86
MAG1053	d__Archaea;p__Thermoproteota;c__Nitrososphaeria;o__Nitrososphaerales;f__Nitrososphaeraceae;g__Nitrosocosmicus;s__Nitrosocosmicus oleophilus	METABOLISM	C	Energy production and conversion	172
MAG1053	d__Archaea;p__Thermoproteota;c__Nitrososphaeria;o__Nitrososphaerales;f__Nitrososphaeraceae;g__Nitrosocosmicus;s__Nitrosocosmicus oleophilus	METABOLISM	E	Amino acid transport and metabolism	148
MAG1053	d__Archaea;p__Thermoproteota;c__Nitrososphaeria;o__Nitrososphaerales;f__Nitrososphaeraceae;g__Nitrosocosmicus;s__Nitrosocosmicus oleophilus	METABOLISM	F	Nucleotide transport and metabolism	71
MAG1053	d__Archaea;p__Thermoproteota;c__Nitrososphaeria;o__Nitrososphaerales;f__Nitrososphaeraceae;g__Nitrosocosmicus;s__Nitrosocosmicus oleophilus	METABOLISM	G	Carbohydrate transport and metabolism	97
MAG1053	d__Archaea;p__Thermoproteota;c__Nitrososphaeria;o__Nitrososphaerales;f__Nitrososphaeraceae;g__Nitrosocosmicus;s__Nitrosocosmicus oleophilus	METABOLISM	H	Coenzyme transport and metabolism	208
MAG1053	d__Archaea;p__Thermoproteota;c__Nitrososphaeria;o__Nitrososphaerales;f__Nitrososphaeraceae;g__Nitrosocosmicus;s__Nitrosocosmicus oleophilus	METABOLISM	I	Lipid transport and metabolism	67
MAG1053	d__Archaea;p__Thermoproteota;c__Nitrososphaeria;o__Nitrososphaerales;f__Nitrososphaeraceae;g__Nitrosocosmicus;s__Nitrosocosmicus oleophilus	METABOLISM	P	Inorganic ion transport and metabolism	126
MAG1053	d__Archaea;p__Thermoproteota;c__Nitrososphaeria;o__Nitrososphaerales;f__Nitrososphaeraceae;g__Nitrosocosmicus;s__Nitrosocosmicus oleophilus	METABOLISM	Q	Secondary metabolites biosynthesis, transport and catabolism	42
MAG1053	d__Archaea;p__Thermoproteota;c__Nitrososphaeria;o__Nitrososphaerales;f__Nitrososphaeraceae;g__Nitrosocosmicus;s__Nitrosocosmicus oleophilus	POORLY CHARACTERIZED	R	General function prediction only	237
MAG1053	d__Archaea;p__Thermoproteota;c__Nitrososphaeria;o__Nitrososphaerales;f__Nitrososphaeraceae;g__Nitrosocosmicus;s__Nitrosocosmicus oleophilus	POORLY CHARACTERIZED	S	Function unknown	68
MAG1055	d__Bacteria;p__Bacillota;c__Bacilli;o__Staphylococcales;f__Salinicoccaceae;g__Jeotgalicoccus;s__Unclassified	CELLULAR PROCESSES AND SIGNALING	D	Cell cycle control, cell division, chromosome partitioning	34
MAG1055	d__Bacteria;p__Bacillota;c__Bacilli;o__Staphylococcales;f__Salinicoccaceae;g__Jeotgalicoccus;s__Unclassified	CELLULAR PROCESSES AND SIGNALING	M	Cell wall/membrane/envelope biogenesis	82
MAG1055	d__Bacteria;p__Bacillota;c__Bacilli;o__Staphylococcales;f__Salinicoccaceae;g__Jeotgalicoccus;s__Unclassified	CELLULAR PROCESSES AND SIGNALING	N	Cell motility	6
MAG1055	d__Bacteria;p__Bacillota;c__Bacilli;o__Staphylococcales;f__Salinicoccaceae;g__Jeotgalicoccus;s__Unclassified	CELLULAR PROCESSES AND SIGNALING	O	Posttranslational modification, protein turnover, chaperones	100
MAG1055	d__Bacteria;p__Bacillota;c__Bacilli;o__Staphylococcales;f__Salinicoccaceae;g__Jeotgalicoccus;s__Unclassified	CELLULAR PROCESSES AND SIGNALING	T	Signal transduction mechanisms	86
MAG1055	d__Bacteria;p__Bacillota;c__Bacilli;o__Staphylococcales;f__Salinicoccaceae;g__Jeotgalicoccus;s__Unclassified	CELLULAR PROCESSES AND SIGNALING	U	Intracellular trafficking, secretion, and vesicular transport	18
MAG1055	d__Bacteria;p__Bacillota;c__Bacilli;o__Staphylococcales;f__Salinicoccaceae;g__Jeotgalicoccus;s__Unclassified	CELLULAR PROCESSES AND SIGNALING	V	Defense mechanisms	75
MAG1055	d__Bacteria;p__Bacillota;c__Bacilli;o__Staphylococcales;f__Salinicoccaceae;g__Jeotgalicoccus;s__Unclassified	CELLULAR PROCESSES AND SIGNALING	W	Extracellular structures	4
MAG1055	d__Bacteria;p__Bacillota;c__Bacilli;o__Staphylococcales;f__Salinicoccaceae;g__Jeotgalicoccus;s__Unclassified	CELLULAR PROCESSES AND SIGNALING	X	Mobilome: prophages, transposons	8
MAG1055	d__Bacteria;p__Bacillota;c__Bacilli;o__Staphylococcales;f__Salinicoccaceae;g__Jeotgalicoccus;s__Unclassified	CELLULAR PROCESSES AND SIGNALING	Z	Cytoskeleton	1
MAG1055	d__Bacteria;p__Bacillota;c__Bacilli;o__Staphylococcales;f__Salinicoccaceae;g__Jeotgalicoccus;s__Unclassified	INFORMATION STORAGE AND PROCESSING	J	Translation, ribosomal structure and biogenesis	172
MAG1055	d__Bacteria;p__Bacillota;c__Bacilli;o__Staphylococcales;f__Salinicoccaceae;g__Jeotgalicoccus;s__Unclassified	INFORMATION STORAGE AND PROCESSING	K	Transcription	116
MAG1055	d__Bacteria;p__Bacillota;c__Bacilli;o__Staphylococcales;f__Salinicoccaceae;g__Jeotgalicoccus;s__Unclassified	INFORMATION STORAGE AND PROCESSING	L	Replication, recombination and repair	101
MAG1055	d__Bacteria;p__Bacillota;c__Bacilli;o__Staphylococcales;f__Salinicoccaceae;g__Jeotgalicoccus;s__Unclassified	METABOLISM	C	Energy production and conversion	124
MAG1055	d__Bacteria;p__Bacillota;c__Bacilli;o__Staphylococcales;f__Salinicoccaceae;g__Jeotgalicoccus;s__Unclassified	METABOLISM	E	Amino acid transport and metabolism	255
MAG1055	d__Bacteria;p__Bacillota;c__Bacilli;o__Staphylococcales;f__Salinicoccaceae;g__Jeotgalicoccus;s__Unclassified	METABOLISM	F	Nucleotide transport and metabolism	97
MAG1055	d__Bacteria;p__Bacillota;c__Bacilli;o__Staphylococcales;f__Salinicoccaceae;g__Jeotgalicoccus;s__Unclassified	METABOLISM	G	Carbohydrate transport and metabolism	128
MAG1055	d__Bacteria;p__Bacillota;c__Bacilli;o__Staphylococcales;f__Salinicoccaceae;g__Jeotgalicoccus;s__Unclassified	METABOLISM	H	Coenzyme transport and metabolism	157
MAG1055	d__Bacteria;p__Bacillota;c__Bacilli;o__Staphylococcales;f__Salinicoccaceae;g__Jeotgalicoccus;s__Unclassified	METABOLISM	I	Lipid transport and metabolism	113
MAG1055	d__Bacteria;p__Bacillota;c__Bacilli;o__Staphylococcales;f__Salinicoccaceae;g__Jeotgalicoccus;s__Unclassified	METABOLISM	P	Inorganic ion transport and metabolism	129
MAG1055	d__Bacteria;p__Bacillota;c__Bacilli;o__Staphylococcales;f__Salinicoccaceae;g__Jeotgalicoccus;s__Unclassified	METABOLISM	Q	Secondary metabolites biosynthesis, transport and catabolism	42
MAG1055	d__Bacteria;p__Bacillota;c__Bacilli;o__Staphylococcales;f__Salinicoccaceae;g__Jeotgalicoccus;s__Unclassified	POORLY CHARACTERIZED	R	General function prediction only	220
MAG1055	d__Bacteria;p__Bacillota;c__Bacilli;o__Staphylococcales;f__Salinicoccaceae;g__Jeotgalicoccus;s__Unclassified	POORLY CHARACTERIZED	S	Function unknown	91
MAG1058	d__Bacteria;p__Pseudomonadota;c__Gammaproteobacteria;o__Pseudomonadales;f__Pseudomonadaceae;g__Halopseudomonas;s__Unclassified	CELLULAR PROCESSES AND SIGNALING	D	Cell cycle control, cell division, chromosome partitioning	44
MAG1058	d__Bacteria;p__Pseudomonadota;c__Gammaproteobacteria;o__Pseudomonadales;f__Pseudomonadaceae;g__Halopseudomonas;s__Unclassified	CELLULAR PROCESSES AND SIGNALING	M	Cell wall/membrane/envelope biogenesis	157
MAG1058	d__Bacteria;p__Pseudomonadota;c__Gammaproteobacteria;o__Pseudomonadales;f__Pseudomonadaceae;g__Halopseudomonas;s__Unclassified	CELLULAR PROCESSES AND SIGNALING	N	Cell motility	90
MAG1058	d__Bacteria;p__Pseudomonadota;c__Gammaproteobacteria;o__Pseudomonadales;f__Pseudomonadaceae;g__Halopseudomonas;s__Unclassified	CELLULAR PROCESSES AND SIGNALING	O	Posttranslational modification, protein turnover, chaperones	131
MAG1058	d__Bacteria;p__Pseudomonadota;c__Gammaproteobacteria;o__Pseudomonadales;f__Pseudomonadaceae;g__Halopseudomonas;s__Unclassified	CELLULAR PROCESSES AND SIGNALING	T	Signal transduction mechanisms	166
MAG1058	d__Bacteria;p__Pseudomonadota;c__Gammaproteobacteria;o__Pseudomonadales;f__Pseudomonadaceae;g__Halopseudomonas;s__Unclassified	CELLULAR PROCESSES AND SIGNALING	U	Intracellular trafficking, secretion, and vesicular transport	78
MAG1058	d__Bacteria;p__Pseudomonadota;c__Gammaproteobacteria;o__Pseudomonadales;f__Pseudomonadaceae;g__Halopseudomonas;s__Unclassified	CELLULAR PROCESSES AND SIGNALING	V	Defense mechanisms	57
MAG1058	d__Bacteria;p__Pseudomonadota;c__Gammaproteobacteria;o__Pseudomonadales;f__Pseudomonadaceae;g__Halopseudomonas;s__Unclassified	CELLULAR PROCESSES AND SIGNALING	W	Extracellular structures	46
MAG1058	d__Bacteria;p__Pseudomonadota;c__Gammaproteobacteria;o__Pseudomonadales;f__Pseudomonadaceae;g__Halopseudomonas;s__Unclassified	CELLULAR PROCESSES AND SIGNALING	X	Mobilome: prophages, transposons	4
MAG1058	d__Bacteria;p__Pseudomonadota;c__Gammaproteobacteria;o__Pseudomonadales;f__Pseudomonadaceae;g__Halopseudomonas;s__Unclassified	CELLULAR PROCESSES AND SIGNALING	Z	Cytoskeleton	3
MAG1058	d__Bacteria;p__Pseudomonadota;c__Gammaproteobacteria;o__Pseudomonadales;f__Pseudomonadaceae;g__Halopseudomonas;s__Unclassified	INFORMATION STORAGE AND PROCESSING	A	RNA processing and modification	1
MAG1058	d__Bacteria;p__Pseudomonadota;c__Gammaproteobacteria;o__Pseudomonadales;f__Pseudomonadaceae;g__Halopseudomonas;s__Unclassified	INFORMATION STORAGE AND PROCESSING	J	Translation, ribosomal structure and biogenesis	147
MAG1058	d__Bacteria;p__Pseudomonadota;c__Gammaproteobacteria;o__Pseudomonadales;f__Pseudomonadaceae;g__Halopseudomonas;s__Unclassified	INFORMATION STORAGE AND PROCESSING	K	Transcription	126
MAG1058	d__Bacteria;p__Pseudomonadota;c__Gammaproteobacteria;o__Pseudomonadales;f__Pseudomonadaceae;g__Halopseudomonas;s__Unclassified	INFORMATION STORAGE AND PROCESSING	L	Replication, recombination and repair	91
MAG1058	d__Bacteria;p__Pseudomonadota;c__Gammaproteobacteria;o__Pseudomonadales;f__Pseudomonadaceae;g__Halopseudomonas;s__Unclassified	METABOLISM	C	Energy production and conversion	155
MAG1058	d__Bacteria;p__Pseudomonadota;c__Gammaproteobacteria;o__Pseudomonadales;f__Pseudomonadaceae;g__Halopseudomonas;s__Unclassified	METABOLISM	E	Amino acid transport and metabolism	173
MAG1058	d__Bacteria;p__Pseudomonadota;c__Gammaproteobacteria;o__Pseudomonadales;f__Pseudomonadaceae;g__Halopseudomonas;s__Unclassified	METABOLISM	F	Nucleotide transport and metabolism	52
MAG1058	d__Bacteria;p__Pseudomonadota;c__Gammaproteobacteria;o__Pseudomonadales;f__Pseudomonadaceae;g__Halopseudomonas;s__Unclassified	METABOLISM	G	Carbohydrate transport and metabolism	92
MAG1058	d__Bacteria;p__Pseudomonadota;c__Gammaproteobacteria;o__Pseudomonadales;f__Pseudomonadaceae;g__Halopseudomonas;s__Unclassified	METABOLISM	H	Coenzyme transport and metabolism	119
MAG1058	d__Bacteria;p__Pseudomonadota;c__Gammaproteobacteria;o__Pseudomonadales;f__Pseudomonadaceae;g__Halopseudomonas;s__Unclassified	METABOLISM	I	Lipid transport and metabolism	136
MAG1058	d__Bacteria;p__Pseudomonadota;c__Gammaproteobacteria;o__Pseudomonadales;f__Pseudomonadaceae;g__Halopseudomonas;s__Unclassified	METABOLISM	P	Inorganic ion transport and metabolism	112
MAG1058	d__Bacteria;p__Pseudomonadota;c__Gammaproteobacteria;o__Pseudomonadales;f__Pseudomonadaceae;g__Halopseudomonas;s__Unclassified	METABOLISM	Q	Secondary metabolites biosynthesis, transport and catabolism	39
MAG1058	d__Bacteria;p__Pseudomonadota;c__Gammaproteobacteria;o__Pseudomonadales;f__Pseudomonadaceae;g__Halopseudomonas;s__Unclassified	POORLY CHARACTERIZED	R	General function prediction only	155
MAG1058	d__Bacteria;p__Pseudomonadota;c__Gammaproteobacteria;o__Pseudomonadales;f__Pseudomonadaceae;g__Halopseudomonas;s__Unclassified	POORLY CHARACTERIZED	S	Function unknown	70
MAG1061	d__Bacteria;p__Actinomycetota;c__Actinomycetia;o__Propionibacteriales;f__Propionibacteriaceae;g__Microlunatus;s__Unclassified	CELLULAR PROCESSES AND SIGNALING	D	Cell cycle control, cell division, chromosome partitioning	27
MAG1061	d__Bacteria;p__Actinomycetota;c__Actinomycetia;o__Propionibacteriales;f__Propionibacteriaceae;g__Microlunatus;s__Unclassified	CELLULAR PROCESSES AND SIGNALING	M	Cell wall/membrane/envelope biogenesis	122
MAG1061	d__Bacteria;p__Actinomycetota;c__Actinomycetia;o__Propionibacteriales;f__Propionibacteriaceae;g__Microlunatus;s__Unclassified	CELLULAR PROCESSES AND SIGNALING	N	Cell motility	11
MAG1061	d__Bacteria;p__Actinomycetota;c__Actinomycetia;o__Propionibacteriales;f__Propionibacteriaceae;g__Microlunatus;s__Unclassified	CELLULAR PROCESSES AND SIGNALING	O	Posttranslational modification, protein turnover, chaperones	104
MAG1061	d__Bacteria;p__Actinomycetota;c__Actinomycetia;o__Propionibacteriales;f__Propionibacteriaceae;g__Microlunatus;s__Unclassified	CELLULAR PROCESSES AND SIGNALING	T	Signal transduction mechanisms	158
MAG1061	d__Bacteria;p__Actinomycetota;c__Actinomycetia;o__Propionibacteriales;f__Propionibacteriaceae;g__Microlunatus;s__Unclassified	CELLULAR PROCESSES AND SIGNALING	U	Intracellular trafficking, secretion, and vesicular transport	26
MAG1061	d__Bacteria;p__Actinomycetota;c__Actinomycetia;o__Propionibacteriales;f__Propionibacteriaceae;g__Microlunatus;s__Unclassified	CELLULAR PROCESSES AND SIGNALING	V	Defense mechanisms	70
MAG1061	d__Bacteria;p__Actinomycetota;c__Actinomycetia;o__Propionibacteriales;f__Propionibacteriaceae;g__Microlunatus;s__Unclassified	CELLULAR PROCESSES AND SIGNALING	W	Extracellular structures	12
MAG1061	d__Bacteria;p__Actinomycetota;c__Actinomycetia;o__Propionibacteriales;f__Propionibacteriaceae;g__Microlunatus;s__Unclassified	CELLULAR PROCESSES AND SIGNALING	X	Mobilome: prophages, transposons	19
MAG1061	d__Bacteria;p__Actinomycetota;c__Actinomycetia;o__Propionibacteriales;f__Propionibacteriaceae;g__Microlunatus;s__Unclassified	INFORMATION STORAGE AND PROCESSING	A	RNA processing and modification	1
MAG1061	d__Bacteria;p__Actinomycetota;c__Actinomycetia;o__Propionibacteriales;f__Propionibacteriaceae;g__Microlunatus;s__Unclassified	INFORMATION STORAGE AND PROCESSING	J	Translation, ribosomal structure and biogenesis	138
MAG1061	d__Bacteria;p__Actinomycetota;c__Actinomycetia;o__Propionibacteriales;f__Propionibacteriaceae;g__Microlunatus;s__Unclassified	INFORMATION STORAGE AND PROCESSING	K	Transcription	259
MAG1061	d__Bacteria;p__Actinomycetota;c__Actinomycetia;o__Propionibacteriales;f__Propionibacteriaceae;g__Microlunatus;s__Unclassified	INFORMATION STORAGE AND PROCESSING	L	Replication, recombination and repair	110
MAG1061	d__Bacteria;p__Actinomycetota;c__Actinomycetia;o__Propionibacteriales;f__Propionibacteriaceae;g__Microlunatus;s__Unclassified	METABOLISM	C	Energy production and conversion	139
MAG1061	d__Bacteria;p__Actinomycetota;c__Actinomycetia;o__Propionibacteriales;f__Propionibacteriaceae;g__Microlunatus;s__Unclassified	METABOLISM	E	Amino acid transport and metabolism	263
MAG1061	d__Bacteria;p__Actinomycetota;c__Actinomycetia;o__Propionibacteriales;f__Propionibacteriaceae;g__Microlunatus;s__Unclassified	METABOLISM	F	Nucleotide transport and metabolism	76
MAG1061	d__Bacteria;p__Actinomycetota;c__Actinomycetia;o__Propionibacteriales;f__Propionibacteriaceae;g__Microlunatus;s__Unclassified	METABOLISM	G	Carbohydrate transport and metabolism	307
MAG1061	d__Bacteria;p__Actinomycetota;c__Actinomycetia;o__Propionibacteriales;f__Propionibacteriaceae;g__Microlunatus;s__Unclassified	METABOLISM	H	Coenzyme transport and metabolism	185
MAG1061	d__Bacteria;p__Actinomycetota;c__Actinomycetia;o__Propionibacteriales;f__Propionibacteriaceae;g__Microlunatus;s__Unclassified	METABOLISM	I	Lipid transport and metabolism	147
MAG1061	d__Bacteria;p__Actinomycetota;c__Actinomycetia;o__Propionibacteriales;f__Propionibacteriaceae;g__Microlunatus;s__Unclassified	METABOLISM	P	Inorganic ion transport and metabolism	157
MAG1061	d__Bacteria;p__Actinomycetota;c__Actinomycetia;o__Propionibacteriales;f__Propionibacteriaceae;g__Microlunatus;s__Unclassified	METABOLISM	Q	Secondary metabolites biosynthesis, transport and catabolism	65
MAG1061	d__Bacteria;p__Actinomycetota;c__Actinomycetia;o__Propionibacteriales;f__Propionibacteriaceae;g__Microlunatus;s__Unclassified	POORLY CHARACTERIZED	R	General function prediction only	317
MAG1061	d__Bacteria;p__Actinomycetota;c__Actinomycetia;o__Propionibacteriales;f__Propionibacteriaceae;g__Microlunatus;s__Unclassified	POORLY CHARACTERIZED	S	Function unknown	87
MAG1066	d__Bacteria;p__Pseudomonadota;c__Alphaproteobacteria;o__Reyranellales;f__Unclassified;g__Unclassified;s__Unclassified	CELLULAR PROCESSES AND SIGNALING	D	Cell cycle control, cell division, chromosome partitioning	29
MAG1066	d__Bacteria;p__Pseudomonadota;c__Alphaproteobacteria;o__Reyranellales;f__Unclassified;g__Unclassified;s__Unclassified	CELLULAR PROCESSES AND SIGNALING	M	Cell wall/membrane/envelope biogenesis	148
MAG1066	d__Bacteria;p__Pseudomonadota;c__Alphaproteobacteria;o__Reyranellales;f__Unclassified;g__Unclassified;s__Unclassified	CELLULAR PROCESSES AND SIGNALING	N	Cell motility	8
MAG1066	d__Bacteria;p__Pseudomonadota;c__Alphaproteobacteria;o__Reyranellales;f__Unclassified;g__Unclassified;s__Unclassified	CELLULAR PROCESSES AND SIGNALING	O	Posttranslational modification, protein turnover, chaperones	111
MAG1066	d__Bacteria;p__Pseudomonadota;c__Alphaproteobacteria;o__Reyranellales;f__Unclassified;g__Unclassified;s__Unclassified	CELLULAR PROCESSES AND SIGNALING	T	Signal transduction mechanisms	104
MAG1066	d__Bacteria;p__Pseudomonadota;c__Alphaproteobacteria;o__Reyranellales;f__Unclassified;g__Unclassified;s__Unclassified	CELLULAR PROCESSES AND SIGNALING	U	Intracellular trafficking, secretion, and vesicular transport	26
MAG1066	d__Bacteria;p__Pseudomonadota;c__Alphaproteobacteria;o__Reyranellales;f__Unclassified;g__Unclassified;s__Unclassified	CELLULAR PROCESSES AND SIGNALING	V	Defense mechanisms	52
MAG1066	d__Bacteria;p__Pseudomonadota;c__Alphaproteobacteria;o__Reyranellales;f__Unclassified;g__Unclassified;s__Unclassified	CELLULAR PROCESSES AND SIGNALING	W	Extracellular structures	9
MAG1066	d__Bacteria;p__Pseudomonadota;c__Alphaproteobacteria;o__Reyranellales;f__Unclassified;g__Unclassified;s__Unclassified	CELLULAR PROCESSES AND SIGNALING	X	Mobilome: prophages, transposons	3
MAG1066	d__Bacteria;p__Pseudomonadota;c__Alphaproteobacteria;o__Reyranellales;f__Unclassified;g__Unclassified;s__Unclassified	CELLULAR PROCESSES AND SIGNALING	Z	Cytoskeleton	2
MAG1066	d__Bacteria;p__Pseudomonadota;c__Alphaproteobacteria;o__Reyranellales;f__Unclassified;g__Unclassified;s__Unclassified	INFORMATION STORAGE AND PROCESSING	J	Translation, ribosomal structure and biogenesis	123
MAG1066	d__Bacteria;p__Pseudomonadota;c__Alphaproteobacteria;o__Reyranellales;f__Unclassified;g__Unclassified;s__Unclassified	INFORMATION STORAGE AND PROCESSING	K	Transcription	109
MAG1066	d__Bacteria;p__Pseudomonadota;c__Alphaproteobacteria;o__Reyranellales;f__Unclassified;g__Unclassified;s__Unclassified	INFORMATION STORAGE AND PROCESSING	L	Replication, recombination and repair	66
MAG1066	d__Bacteria;p__Pseudomonadota;c__Alphaproteobacteria;o__Reyranellales;f__Unclassified;g__Unclassified;s__Unclassified	METABOLISM	C	Energy production and conversion	196
MAG1066	d__Bacteria;p__Pseudomonadota;c__Alphaproteobacteria;o__Reyranellales;f__Unclassified;g__Unclassified;s__Unclassified	METABOLISM	E	Amino acid transport and metabolism	366
MAG1066	d__Bacteria;p__Pseudomonadota;c__Alphaproteobacteria;o__Reyranellales;f__Unclassified;g__Unclassified;s__Unclassified	METABOLISM	F	Nucleotide transport and metabolism	62
MAG1066	d__Bacteria;p__Pseudomonadota;c__Alphaproteobacteria;o__Reyranellales;f__Unclassified;g__Unclassified;s__Unclassified	METABOLISM	G	Carbohydrate transport and metabolism	205
MAG1066	d__Bacteria;p__Pseudomonadota;c__Alphaproteobacteria;o__Reyranellales;f__Unclassified;g__Unclassified;s__Unclassified	METABOLISM	H	Coenzyme transport and metabolism	183
MAG1066	d__Bacteria;p__Pseudomonadota;c__Alphaproteobacteria;o__Reyranellales;f__Unclassified;g__Unclassified;s__Unclassified	METABOLISM	I	Lipid transport and metabolism	289
MAG1066	d__Bacteria;p__Pseudomonadota;c__Alphaproteobacteria;o__Reyranellales;f__Unclassified;g__Unclassified;s__Unclassified	METABOLISM	P	Inorganic ion transport and metabolism	176
MAG1066	d__Bacteria;p__Pseudomonadota;c__Alphaproteobacteria;o__Reyranellales;f__Unclassified;g__Unclassified;s__Unclassified	METABOLISM	Q	Secondary metabolites biosynthesis, transport and catabolism	100
MAG1066	d__Bacteria;p__Pseudomonadota;c__Alphaproteobacteria;o__Reyranellales;f__Unclassified;g__Unclassified;s__Unclassified	POORLY CHARACTERIZED	R	General function prediction only	265
MAG1066	d__Bacteria;p__Pseudomonadota;c__Alphaproteobacteria;o__Reyranellales;f__Unclassified;g__Unclassified;s__Unclassified	POORLY CHARACTERIZED	S	Function unknown	97
MAG1067	d__Bacteria;p__Pseudomonadota;c__Gammaproteobacteria;o__Xanthomonadales;f__Xanthomonadaceae;g__Pseudoxanthomonas_A;s__Unclassified	CELLULAR PROCESSES AND SIGNALING	D	Cell cycle control, cell division, chromosome partitioning	36
MAG1067	d__Bacteria;p__Pseudomonadota;c__Gammaproteobacteria;o__Xanthomonadales;f__Xanthomonadaceae;g__Pseudoxanthomonas_A;s__Unclassified	CELLULAR PROCESSES AND SIGNALING	M	Cell wall/membrane/envelope biogenesis	209
MAG1067	d__Bacteria;p__Pseudomonadota;c__Gammaproteobacteria;o__Xanthomonadales;f__Xanthomonadaceae;g__Pseudoxanthomonas_A;s__Unclassified	CELLULAR PROCESSES AND SIGNALING	N	Cell motility	67
MAG1067	d__Bacteria;p__Pseudomonadota;c__Gammaproteobacteria;o__Xanthomonadales;f__Xanthomonadaceae;g__Pseudoxanthomonas_A;s__Unclassified	CELLULAR PROCESSES AND SIGNALING	O	Posttranslational modification, protein turnover, chaperones	145
MAG1067	d__Bacteria;p__Pseudomonadota;c__Gammaproteobacteria;o__Xanthomonadales;f__Xanthomonadaceae;g__Pseudoxanthomonas_A;s__Unclassified	CELLULAR PROCESSES AND SIGNALING	T	Signal transduction mechanisms	189
MAG1067	d__Bacteria;p__Pseudomonadota;c__Gammaproteobacteria;o__Xanthomonadales;f__Xanthomonadaceae;g__Pseudoxanthomonas_A;s__Unclassified	CELLULAR PROCESSES AND SIGNALING	U	Intracellular trafficking, secretion, and vesicular transport	51
MAG1067	d__Bacteria;p__Pseudomonadota;c__Gammaproteobacteria;o__Xanthomonadales;f__Xanthomonadaceae;g__Pseudoxanthomonas_A;s__Unclassified	CELLULAR PROCESSES AND SIGNALING	V	Defense mechanisms	64
MAG1067	d__Bacteria;p__Pseudomonadota;c__Gammaproteobacteria;o__Xanthomonadales;f__Xanthomonadaceae;g__Pseudoxanthomonas_A;s__Unclassified	CELLULAR PROCESSES AND SIGNALING	W	Extracellular structures	35
MAG1067	d__Bacteria;p__Pseudomonadota;c__Gammaproteobacteria;o__Xanthomonadales;f__Xanthomonadaceae;g__Pseudoxanthomonas_A;s__Unclassified	CELLULAR PROCESSES AND SIGNALING	X	Mobilome: prophages, transposons	13
MAG1067	d__Bacteria;p__Pseudomonadota;c__Gammaproteobacteria;o__Xanthomonadales;f__Xanthomonadaceae;g__Pseudoxanthomonas_A;s__Unclassified	CELLULAR PROCESSES AND SIGNALING	Z	Cytoskeleton	6
MAG1067	d__Bacteria;p__Pseudomonadota;c__Gammaproteobacteria;o__Xanthomonadales;f__Xanthomonadaceae;g__Pseudoxanthomonas_A;s__Unclassified	INFORMATION STORAGE AND PROCESSING	A	RNA processing and modification	1
MAG1067	d__Bacteria;p__Pseudomonadota;c__Gammaproteobacteria;o__Xanthomonadales;f__Xanthomonadaceae;g__Pseudoxanthomonas_A;s__Unclassified	INFORMATION STORAGE AND PROCESSING	J	Translation, ribosomal structure and biogenesis	199
MAG1067	d__Bacteria;p__Pseudomonadota;c__Gammaproteobacteria;o__Xanthomonadales;f__Xanthomonadaceae;g__Pseudoxanthomonas_A;s__Unclassified	INFORMATION STORAGE AND PROCESSING	K	Transcription	176
MAG1067	d__Bacteria;p__Pseudomonadota;c__Gammaproteobacteria;o__Xanthomonadales;f__Xanthomonadaceae;g__Pseudoxanthomonas_A;s__Unclassified	INFORMATION STORAGE AND PROCESSING	L	Replication, recombination and repair	118
MAG1067	d__Bacteria;p__Pseudomonadota;c__Gammaproteobacteria;o__Xanthomonadales;f__Xanthomonadaceae;g__Pseudoxanthomonas_A;s__Unclassified	METABOLISM	C	Energy production and conversion	168
MAG1067	d__Bacteria;p__Pseudomonadota;c__Gammaproteobacteria;o__Xanthomonadales;f__Xanthomonadaceae;g__Pseudoxanthomonas_A;s__Unclassified	METABOLISM	E	Amino acid transport and metabolism	199
MAG1067	d__Bacteria;p__Pseudomonadota;c__Gammaproteobacteria;o__Xanthomonadales;f__Xanthomonadaceae;g__Pseudoxanthomonas_A;s__Unclassified	METABOLISM	F	Nucleotide transport and metabolism	63
MAG1067	d__Bacteria;p__Pseudomonadota;c__Gammaproteobacteria;o__Xanthomonadales;f__Xanthomonadaceae;g__Pseudoxanthomonas_A;s__Unclassified	METABOLISM	G	Carbohydrate transport and metabolism	164
MAG1067	d__Bacteria;p__Pseudomonadota;c__Gammaproteobacteria;o__Xanthomonadales;f__Xanthomonadaceae;g__Pseudoxanthomonas_A;s__Unclassified	METABOLISM	H	Coenzyme transport and metabolism	145
MAG1067	d__Bacteria;p__Pseudomonadota;c__Gammaproteobacteria;o__Xanthomonadales;f__Xanthomonadaceae;g__Pseudoxanthomonas_A;s__Unclassified	METABOLISM	I	Lipid transport and metabolism	124
MAG1067	d__Bacteria;p__Pseudomonadota;c__Gammaproteobacteria;o__Xanthomonadales;f__Xanthomonadaceae;g__Pseudoxanthomonas_A;s__Unclassified	METABOLISM	P	Inorganic ion transport and metabolism	146
MAG1067	d__Bacteria;p__Pseudomonadota;c__Gammaproteobacteria;o__Xanthomonadales;f__Xanthomonadaceae;g__Pseudoxanthomonas_A;s__Unclassified	METABOLISM	Q	Secondary metabolites biosynthesis, transport and catabolism	55
MAG1067	d__Bacteria;p__Pseudomonadota;c__Gammaproteobacteria;o__Xanthomonadales;f__Xanthomonadaceae;g__Pseudoxanthomonas_A;s__Unclassified	POORLY CHARACTERIZED	R	General function prediction only	236
MAG1067	d__Bacteria;p__Pseudomonadota;c__Gammaproteobacteria;o__Xanthomonadales;f__Xanthomonadaceae;g__Pseudoxanthomonas_A;s__Unclassified	POORLY CHARACTERIZED	S	Function unknown	134
MAG1069	d__Bacteria;p__Pseudomonadota;c__Gammaproteobacteria;o__Xanthomonadales;f__Xanthomonadaceae;g__Lysobacter_B;s__Lysobacter_B sp011300685	CELLULAR PROCESSES AND SIGNALING	D	Cell cycle control, cell division, chromosome partitioning	42
MAG1069	d__Bacteria;p__Pseudomonadota;c__Gammaproteobacteria;o__Xanthomonadales;f__Xanthomonadaceae;g__Lysobacter_B;s__Lysobacter_B sp011300685	CELLULAR PROCESSES AND SIGNALING	M	Cell wall/membrane/envelope biogenesis	167
MAG1069	d__Bacteria;p__Pseudomonadota;c__Gammaproteobacteria;o__Xanthomonadales;f__Xanthomonadaceae;g__Lysobacter_B;s__Lysobacter_B sp011300685	CELLULAR PROCESSES AND SIGNALING	N	Cell motility	21
MAG1069	d__Bacteria;p__Pseudomonadota;c__Gammaproteobacteria;o__Xanthomonadales;f__Xanthomonadaceae;g__Lysobacter_B;s__Lysobacter_B sp011300685	CELLULAR PROCESSES AND SIGNALING	O	Posttranslational modification, protein turnover, chaperones	142
MAG1069	d__Bacteria;p__Pseudomonadota;c__Gammaproteobacteria;o__Xanthomonadales;f__Xanthomonadaceae;g__Lysobacter_B;s__Lysobacter_B sp011300685	CELLULAR PROCESSES AND SIGNALING	T	Signal transduction mechanisms	116
MAG1069	d__Bacteria;p__Pseudomonadota;c__Gammaproteobacteria;o__Xanthomonadales;f__Xanthomonadaceae;g__Lysobacter_B;s__Lysobacter_B sp011300685	CELLULAR PROCESSES AND SIGNALING	U	Intracellular trafficking, secretion, and vesicular transport	52
MAG1069	d__Bacteria;p__Pseudomonadota;c__Gammaproteobacteria;o__Xanthomonadales;f__Xanthomonadaceae;g__Lysobacter_B;s__Lysobacter_B sp011300685	CELLULAR PROCESSES AND SIGNALING	V	Defense mechanisms	55
MAG1069	d__Bacteria;p__Pseudomonadota;c__Gammaproteobacteria;o__Xanthomonadales;f__Xanthomonadaceae;g__Lysobacter_B;s__Lysobacter_B sp011300685	CELLULAR PROCESSES AND SIGNALING	W	Extracellular structures	19
MAG1069	d__Bacteria;p__Pseudomonadota;c__Gammaproteobacteria;o__Xanthomonadales;f__Xanthomonadaceae;g__Lysobacter_B;s__Lysobacter_B sp011300685	CELLULAR PROCESSES AND SIGNALING	X	Mobilome: prophages, transposons	5
MAG1069	d__Bacteria;p__Pseudomonadota;c__Gammaproteobacteria;o__Xanthomonadales;f__Xanthomonadaceae;g__Lysobacter_B;s__Lysobacter_B sp011300685	CELLULAR PROCESSES AND SIGNALING	Z	Cytoskeleton	4
MAG1069	d__Bacteria;p__Pseudomonadota;c__Gammaproteobacteria;o__Xanthomonadales;f__Xanthomonadaceae;g__Lysobacter_B;s__Lysobacter_B sp011300685	INFORMATION STORAGE AND PROCESSING	A	RNA processing and modification	1
MAG1069	d__Bacteria;p__Pseudomonadota;c__Gammaproteobacteria;o__Xanthomonadales;f__Xanthomonadaceae;g__Lysobacter_B;s__Lysobacter_B sp011300685	INFORMATION STORAGE AND PROCESSING	J	Translation, ribosomal structure and biogenesis	221
MAG1069	d__Bacteria;p__Pseudomonadota;c__Gammaproteobacteria;o__Xanthomonadales;f__Xanthomonadaceae;g__Lysobacter_B;s__Lysobacter_B sp011300685	INFORMATION STORAGE AND PROCESSING	K	Transcription	105
MAG1069	d__Bacteria;p__Pseudomonadota;c__Gammaproteobacteria;o__Xanthomonadales;f__Xanthomonadaceae;g__Lysobacter_B;s__Lysobacter_B sp011300685	INFORMATION STORAGE AND PROCESSING	L	Replication, recombination and repair	103
MAG1069	d__Bacteria;p__Pseudomonadota;c__Gammaproteobacteria;o__Xanthomonadales;f__Xanthomonadaceae;g__Lysobacter_B;s__Lysobacter_B sp011300685	METABOLISM	C	Energy production and conversion	134
MAG1069	d__Bacteria;p__Pseudomonadota;c__Gammaproteobacteria;o__Xanthomonadales;f__Xanthomonadaceae;g__Lysobacter_B;s__Lysobacter_B sp011300685	METABOLISM	E	Amino acid transport and metabolism	153
MAG1069	d__Bacteria;p__Pseudomonadota;c__Gammaproteobacteria;o__Xanthomonadales;f__Xanthomonadaceae;g__Lysobacter_B;s__Lysobacter_B sp011300685	METABOLISM	F	Nucleotide transport and metabolism	54
MAG1069	d__Bacteria;p__Pseudomonadota;c__Gammaproteobacteria;o__Xanthomonadales;f__Xanthomonadaceae;g__Lysobacter_B;s__Lysobacter_B sp011300685	METABOLISM	G	Carbohydrate transport and metabolism	56
MAG1069	d__Bacteria;p__Pseudomonadota;c__Gammaproteobacteria;o__Xanthomonadales;f__Xanthomonadaceae;g__Lysobacter_B;s__Lysobacter_B sp011300685	METABOLISM	H	Coenzyme transport and metabolism	105
MAG1069	d__Bacteria;p__Pseudomonadota;c__Gammaproteobacteria;o__Xanthomonadales;f__Xanthomonadaceae;g__Lysobacter_B;s__Lysobacter_B sp011300685	METABOLISM	I	Lipid transport and metabolism	106
MAG1069	d__Bacteria;p__Pseudomonadota;c__Gammaproteobacteria;o__Xanthomonadales;f__Xanthomonadaceae;g__Lysobacter_B;s__Lysobacter_B sp011300685	METABOLISM	P	Inorganic ion transport and metabolism	77
MAG1069	d__Bacteria;p__Pseudomonadota;c__Gammaproteobacteria;o__Xanthomonadales;f__Xanthomonadaceae;g__Lysobacter_B;s__Lysobacter_B sp011300685	METABOLISM	Q	Secondary metabolites biosynthesis, transport and catabolism	32
MAG1069	d__Bacteria;p__Pseudomonadota;c__Gammaproteobacteria;o__Xanthomonadales;f__Xanthomonadaceae;g__Lysobacter_B;s__Lysobacter_B sp011300685	POORLY CHARACTERIZED	R	General function prediction only	126
MAG1069	d__Bacteria;p__Pseudomonadota;c__Gammaproteobacteria;o__Xanthomonadales;f__Xanthomonadaceae;g__Lysobacter_B;s__Lysobacter_B sp011300685	POORLY CHARACTERIZED	S	Function unknown	69
MAG1072	d__Bacteria;p__Pseudomonadota;c__Alphaproteobacteria;o__Rhizobiales;f__Rhizobiaceae;g__Aquamicrobium_A;s__Unclassified	CELLULAR PROCESSES AND SIGNALING	D	Cell cycle control, cell division, chromosome partitioning	37
MAG1072	d__Bacteria;p__Pseudomonadota;c__Alphaproteobacteria;o__Rhizobiales;f__Rhizobiaceae;g__Aquamicrobium_A;s__Unclassified	CELLULAR PROCESSES AND SIGNALING	M	Cell wall/membrane/envelope biogenesis	146
MAG1072	d__Bacteria;p__Pseudomonadota;c__Alphaproteobacteria;o__Rhizobiales;f__Rhizobiaceae;g__Aquamicrobium_A;s__Unclassified	CELLULAR PROCESSES AND SIGNALING	N	Cell motility	33
MAG1072	d__Bacteria;p__Pseudomonadota;c__Alphaproteobacteria;o__Rhizobiales;f__Rhizobiaceae;g__Aquamicrobium_A;s__Unclassified	CELLULAR PROCESSES AND SIGNALING	O	Posttranslational modification, protein turnover, chaperones	126
MAG1072	d__Bacteria;p__Pseudomonadota;c__Alphaproteobacteria;o__Rhizobiales;f__Rhizobiaceae;g__Aquamicrobium_A;s__Unclassified	CELLULAR PROCESSES AND SIGNALING	T	Signal transduction mechanisms	144
MAG1072	d__Bacteria;p__Pseudomonadota;c__Alphaproteobacteria;o__Rhizobiales;f__Rhizobiaceae;g__Aquamicrobium_A;s__Unclassified	CELLULAR PROCESSES AND SIGNALING	U	Intracellular trafficking, secretion, and vesicular transport	25
MAG1072	d__Bacteria;p__Pseudomonadota;c__Alphaproteobacteria;o__Rhizobiales;f__Rhizobiaceae;g__Aquamicrobium_A;s__Unclassified	CELLULAR PROCESSES AND SIGNALING	V	Defense mechanisms	59
MAG1072	d__Bacteria;p__Pseudomonadota;c__Alphaproteobacteria;o__Rhizobiales;f__Rhizobiaceae;g__Aquamicrobium_A;s__Unclassified	CELLULAR PROCESSES AND SIGNALING	W	Extracellular structures	15
MAG1072	d__Bacteria;p__Pseudomonadota;c__Alphaproteobacteria;o__Rhizobiales;f__Rhizobiaceae;g__Aquamicrobium_A;s__Unclassified	CELLULAR PROCESSES AND SIGNALING	X	Mobilome: prophages, transposons	43
MAG1072	d__Bacteria;p__Pseudomonadota;c__Alphaproteobacteria;o__Rhizobiales;f__Rhizobiaceae;g__Aquamicrobium_A;s__Unclassified	INFORMATION STORAGE AND PROCESSING	J	Translation, ribosomal structure and biogenesis	155
MAG1072	d__Bacteria;p__Pseudomonadota;c__Alphaproteobacteria;o__Rhizobiales;f__Rhizobiaceae;g__Aquamicrobium_A;s__Unclassified	INFORMATION STORAGE AND PROCESSING	K	Transcription	183
MAG1072	d__Bacteria;p__Pseudomonadota;c__Alphaproteobacteria;o__Rhizobiales;f__Rhizobiaceae;g__Aquamicrobium_A;s__Unclassified	INFORMATION STORAGE AND PROCESSING	L	Replication, recombination and repair	103
MAG1072	d__Bacteria;p__Pseudomonadota;c__Alphaproteobacteria;o__Rhizobiales;f__Rhizobiaceae;g__Aquamicrobium_A;s__Unclassified	METABOLISM	C	Energy production and conversion	195
MAG1072	d__Bacteria;p__Pseudomonadota;c__Alphaproteobacteria;o__Rhizobiales;f__Rhizobiaceae;g__Aquamicrobium_A;s__Unclassified	METABOLISM	E	Amino acid transport and metabolism	329
MAG1072	d__Bacteria;p__Pseudomonadota;c__Alphaproteobacteria;o__Rhizobiales;f__Rhizobiaceae;g__Aquamicrobium_A;s__Unclassified	METABOLISM	F	Nucleotide transport and metabolism	81
MAG1072	d__Bacteria;p__Pseudomonadota;c__Alphaproteobacteria;o__Rhizobiales;f__Rhizobiaceae;g__Aquamicrobium_A;s__Unclassified	METABOLISM	G	Carbohydrate transport and metabolism	204
MAG1072	d__Bacteria;p__Pseudomonadota;c__Alphaproteobacteria;o__Rhizobiales;f__Rhizobiaceae;g__Aquamicrobium_A;s__Unclassified	METABOLISM	H	Coenzyme transport and metabolism	142
MAG1072	d__Bacteria;p__Pseudomonadota;c__Alphaproteobacteria;o__Rhizobiales;f__Rhizobiaceae;g__Aquamicrobium_A;s__Unclassified	METABOLISM	I	Lipid transport and metabolism	186
MAG1072	d__Bacteria;p__Pseudomonadota;c__Alphaproteobacteria;o__Rhizobiales;f__Rhizobiaceae;g__Aquamicrobium_A;s__Unclassified	METABOLISM	P	Inorganic ion transport and metabolism	146
MAG1072	d__Bacteria;p__Pseudomonadota;c__Alphaproteobacteria;o__Rhizobiales;f__Rhizobiaceae;g__Aquamicrobium_A;s__Unclassified	METABOLISM	Q	Secondary metabolites biosynthesis, transport and catabolism	75
MAG1072	d__Bacteria;p__Pseudomonadota;c__Alphaproteobacteria;o__Rhizobiales;f__Rhizobiaceae;g__Aquamicrobium_A;s__Unclassified	POORLY CHARACTERIZED	R	General function prediction only	213
MAG1072	d__Bacteria;p__Pseudomonadota;c__Alphaproteobacteria;o__Rhizobiales;f__Rhizobiaceae;g__Aquamicrobium_A;s__Unclassified	POORLY CHARACTERIZED	S	Function unknown	115
MAG1077	d__Bacteria;p__Bacteroidota;c__Bacteroidia;o__Chitinophagales;f__Chitinophagaceae;g__Flavisolibacter;s__Unclassified	CELLULAR PROCESSES AND SIGNALING	D	Cell cycle control, cell division, chromosome partitioning	52
MAG1077	d__Bacteria;p__Bacteroidota;c__Bacteroidia;o__Chitinophagales;f__Chitinophagaceae;g__Flavisolibacter;s__Unclassified	CELLULAR PROCESSES AND SIGNALING	M	Cell wall/membrane/envelope biogenesis	264
MAG1077	d__Bacteria;p__Bacteroidota;c__Bacteroidia;o__Chitinophagales;f__Chitinophagaceae;g__Flavisolibacter;s__Unclassified	CELLULAR PROCESSES AND SIGNALING	N	Cell motility	26
MAG1077	d__Bacteria;p__Bacteroidota;c__Bacteroidia;o__Chitinophagales;f__Chitinophagaceae;g__Flavisolibacter;s__Unclassified	CELLULAR PROCESSES AND SIGNALING	O	Posttranslational modification, protein turnover, chaperones	185
MAG1077	d__Bacteria;p__Bacteroidota;c__Bacteroidia;o__Chitinophagales;f__Chitinophagaceae;g__Flavisolibacter;s__Unclassified	CELLULAR PROCESSES AND SIGNALING	T	Signal transduction mechanisms	224
MAG1077	d__Bacteria;p__Bacteroidota;c__Bacteroidia;o__Chitinophagales;f__Chitinophagaceae;g__Flavisolibacter;s__Unclassified	CELLULAR PROCESSES AND SIGNALING	U	Intracellular trafficking, secretion, and vesicular transport	42
MAG1077	d__Bacteria;p__Bacteroidota;c__Bacteroidia;o__Chitinophagales;f__Chitinophagaceae;g__Flavisolibacter;s__Unclassified	CELLULAR PROCESSES AND SIGNALING	V	Defense mechanisms	67
MAG1077	d__Bacteria;p__Bacteroidota;c__Bacteroidia;o__Chitinophagales;f__Chitinophagaceae;g__Flavisolibacter;s__Unclassified	CELLULAR PROCESSES AND SIGNALING	W	Extracellular structures	13
MAG1077	d__Bacteria;p__Bacteroidota;c__Bacteroidia;o__Chitinophagales;f__Chitinophagaceae;g__Flavisolibacter;s__Unclassified	CELLULAR PROCESSES AND SIGNALING	X	Mobilome: prophages, transposons	20
MAG1077	d__Bacteria;p__Bacteroidota;c__Bacteroidia;o__Chitinophagales;f__Chitinophagaceae;g__Flavisolibacter;s__Unclassified	CELLULAR PROCESSES AND SIGNALING	Z	Cytoskeleton	4
MAG1077	d__Bacteria;p__Bacteroidota;c__Bacteroidia;o__Chitinophagales;f__Chitinophagaceae;g__Flavisolibacter;s__Unclassified	INFORMATION STORAGE AND PROCESSING	B	Chromatin structure and dynamics	1
MAG1077	d__Bacteria;p__Bacteroidota;c__Bacteroidia;o__Chitinophagales;f__Chitinophagaceae;g__Flavisolibacter;s__Unclassified	INFORMATION STORAGE AND PROCESSING	J	Translation, ribosomal structure and biogenesis	216
MAG1077	d__Bacteria;p__Bacteroidota;c__Bacteroidia;o__Chitinophagales;f__Chitinophagaceae;g__Flavisolibacter;s__Unclassified	INFORMATION STORAGE AND PROCESSING	K	Transcription	177
MAG1077	d__Bacteria;p__Bacteroidota;c__Bacteroidia;o__Chitinophagales;f__Chitinophagaceae;g__Flavisolibacter;s__Unclassified	INFORMATION STORAGE AND PROCESSING	L	Replication, recombination and repair	141
MAG1077	d__Bacteria;p__Bacteroidota;c__Bacteroidia;o__Chitinophagales;f__Chitinophagaceae;g__Flavisolibacter;s__Unclassified	METABOLISM	C	Energy production and conversion	141
MAG1077	d__Bacteria;p__Bacteroidota;c__Bacteroidia;o__Chitinophagales;f__Chitinophagaceae;g__Flavisolibacter;s__Unclassified	METABOLISM	E	Amino acid transport and metabolism	223
MAG1077	d__Bacteria;p__Bacteroidota;c__Bacteroidia;o__Chitinophagales;f__Chitinophagaceae;g__Flavisolibacter;s__Unclassified	METABOLISM	F	Nucleotide transport and metabolism	87
MAG1077	d__Bacteria;p__Bacteroidota;c__Bacteroidia;o__Chitinophagales;f__Chitinophagaceae;g__Flavisolibacter;s__Unclassified	METABOLISM	G	Carbohydrate transport and metabolism	281
MAG1077	d__Bacteria;p__Bacteroidota;c__Bacteroidia;o__Chitinophagales;f__Chitinophagaceae;g__Flavisolibacter;s__Unclassified	METABOLISM	H	Coenzyme transport and metabolism	217
MAG1077	d__Bacteria;p__Bacteroidota;c__Bacteroidia;o__Chitinophagales;f__Chitinophagaceae;g__Flavisolibacter;s__Unclassified	METABOLISM	I	Lipid transport and metabolism	160
MAG1077	d__Bacteria;p__Bacteroidota;c__Bacteroidia;o__Chitinophagales;f__Chitinophagaceae;g__Flavisolibacter;s__Unclassified	METABOLISM	P	Inorganic ion transport and metabolism	214
MAG1077	d__Bacteria;p__Bacteroidota;c__Bacteroidia;o__Chitinophagales;f__Chitinophagaceae;g__Flavisolibacter;s__Unclassified	METABOLISM	Q	Secondary metabolites biosynthesis, transport and catabolism	49
MAG1077	d__Bacteria;p__Bacteroidota;c__Bacteroidia;o__Chitinophagales;f__Chitinophagaceae;g__Flavisolibacter;s__Unclassified	POORLY CHARACTERIZED	R	General function prediction only	295
MAG1077	d__Bacteria;p__Bacteroidota;c__Bacteroidia;o__Chitinophagales;f__Chitinophagaceae;g__Flavisolibacter;s__Unclassified	POORLY CHARACTERIZED	S	Function unknown	130
MAG1078	d__Bacteria;p__Actinomycetota;c__Actinomycetia;o__Actinomycetales;f__Microbacteriaceae;g__Yonghaparkia;s__Unclassified	CELLULAR PROCESSES AND SIGNALING	D	Cell cycle control, cell division, chromosome partitioning	32
MAG1078	d__Bacteria;p__Actinomycetota;c__Actinomycetia;o__Actinomycetales;f__Microbacteriaceae;g__Yonghaparkia;s__Unclassified	CELLULAR PROCESSES AND SIGNALING	M	Cell wall/membrane/envelope biogenesis	77
MAG1078	d__Bacteria;p__Actinomycetota;c__Actinomycetia;o__Actinomycetales;f__Microbacteriaceae;g__Yonghaparkia;s__Unclassified	CELLULAR PROCESSES AND SIGNALING	N	Cell motility	13
MAG1078	d__Bacteria;p__Actinomycetota;c__Actinomycetia;o__Actinomycetales;f__Microbacteriaceae;g__Yonghaparkia;s__Unclassified	CELLULAR PROCESSES AND SIGNALING	O	Posttranslational modification, protein turnover, chaperones	94
MAG1078	d__Bacteria;p__Actinomycetota;c__Actinomycetia;o__Actinomycetales;f__Microbacteriaceae;g__Yonghaparkia;s__Unclassified	CELLULAR PROCESSES AND SIGNALING	T	Signal transduction mechanisms	107
MAG1078	d__Bacteria;p__Actinomycetota;c__Actinomycetia;o__Actinomycetales;f__Microbacteriaceae;g__Yonghaparkia;s__Unclassified	CELLULAR PROCESSES AND SIGNALING	U	Intracellular trafficking, secretion, and vesicular transport	26
MAG1078	d__Bacteria;p__Actinomycetota;c__Actinomycetia;o__Actinomycetales;f__Microbacteriaceae;g__Yonghaparkia;s__Unclassified	CELLULAR PROCESSES AND SIGNALING	V	Defense mechanisms	44
MAG1078	d__Bacteria;p__Actinomycetota;c__Actinomycetia;o__Actinomycetales;f__Microbacteriaceae;g__Yonghaparkia;s__Unclassified	CELLULAR PROCESSES AND SIGNALING	W	Extracellular structures	9
MAG1078	d__Bacteria;p__Actinomycetota;c__Actinomycetia;o__Actinomycetales;f__Microbacteriaceae;g__Yonghaparkia;s__Unclassified	CELLULAR PROCESSES AND SIGNALING	X	Mobilome: prophages, transposons	1
MAG1078	d__Bacteria;p__Actinomycetota;c__Actinomycetia;o__Actinomycetales;f__Microbacteriaceae;g__Yonghaparkia;s__Unclassified	INFORMATION STORAGE AND PROCESSING	A	RNA processing and modification	1
MAG1078	d__Bacteria;p__Actinomycetota;c__Actinomycetia;o__Actinomycetales;f__Microbacteriaceae;g__Yonghaparkia;s__Unclassified	INFORMATION STORAGE AND PROCESSING	J	Translation, ribosomal structure and biogenesis	144
MAG1078	d__Bacteria;p__Actinomycetota;c__Actinomycetia;o__Actinomycetales;f__Microbacteriaceae;g__Yonghaparkia;s__Unclassified	INFORMATION STORAGE AND PROCESSING	K	Transcription	155
MAG1078	d__Bacteria;p__Actinomycetota;c__Actinomycetia;o__Actinomycetales;f__Microbacteriaceae;g__Yonghaparkia;s__Unclassified	INFORMATION STORAGE AND PROCESSING	L	Replication, recombination and repair	93
MAG1078	d__Bacteria;p__Actinomycetota;c__Actinomycetia;o__Actinomycetales;f__Microbacteriaceae;g__Yonghaparkia;s__Unclassified	METABOLISM	C	Energy production and conversion	106
MAG1078	d__Bacteria;p__Actinomycetota;c__Actinomycetia;o__Actinomycetales;f__Microbacteriaceae;g__Yonghaparkia;s__Unclassified	METABOLISM	E	Amino acid transport and metabolism	204
MAG1078	d__Bacteria;p__Actinomycetota;c__Actinomycetia;o__Actinomycetales;f__Microbacteriaceae;g__Yonghaparkia;s__Unclassified	METABOLISM	F	Nucleotide transport and metabolism	67
MAG1078	d__Bacteria;p__Actinomycetota;c__Actinomycetia;o__Actinomycetales;f__Microbacteriaceae;g__Yonghaparkia;s__Unclassified	METABOLISM	G	Carbohydrate transport and metabolism	176
MAG1078	d__Bacteria;p__Actinomycetota;c__Actinomycetia;o__Actinomycetales;f__Microbacteriaceae;g__Yonghaparkia;s__Unclassified	METABOLISM	H	Coenzyme transport and metabolism	135
MAG1078	d__Bacteria;p__Actinomycetota;c__Actinomycetia;o__Actinomycetales;f__Microbacteriaceae;g__Yonghaparkia;s__Unclassified	METABOLISM	I	Lipid transport and metabolism	104
MAG1078	d__Bacteria;p__Actinomycetota;c__Actinomycetia;o__Actinomycetales;f__Microbacteriaceae;g__Yonghaparkia;s__Unclassified	METABOLISM	P	Inorganic ion transport and metabolism	86
MAG1078	d__Bacteria;p__Actinomycetota;c__Actinomycetia;o__Actinomycetales;f__Microbacteriaceae;g__Yonghaparkia;s__Unclassified	METABOLISM	Q	Secondary metabolites biosynthesis, transport and catabolism	33
MAG1078	d__Bacteria;p__Actinomycetota;c__Actinomycetia;o__Actinomycetales;f__Microbacteriaceae;g__Yonghaparkia;s__Unclassified	POORLY CHARACTERIZED	R	General function prediction only	153
MAG1078	d__Bacteria;p__Actinomycetota;c__Actinomycetia;o__Actinomycetales;f__Microbacteriaceae;g__Yonghaparkia;s__Unclassified	POORLY CHARACTERIZED	S	Function unknown	64
MAG1085	d__Bacteria;p__Bacillota;c__Bacilli;o__Lactobacillales;f__Lactobacillaceae;g__Limosilactobacillus;s__Limosilactobacillus ingluviei	CELLULAR PROCESSES AND SIGNALING	D	Cell cycle control, cell division, chromosome partitioning	34
MAG1085	d__Bacteria;p__Bacillota;c__Bacilli;o__Lactobacillales;f__Lactobacillaceae;g__Limosilactobacillus;s__Limosilactobacillus ingluviei	CELLULAR PROCESSES AND SIGNALING	M	Cell wall/membrane/envelope biogenesis	110
MAG1085	d__Bacteria;p__Bacillota;c__Bacilli;o__Lactobacillales;f__Lactobacillaceae;g__Limosilactobacillus;s__Limosilactobacillus ingluviei	CELLULAR PROCESSES AND SIGNALING	N	Cell motility	10
MAG1085	d__Bacteria;p__Bacillota;c__Bacilli;o__Lactobacillales;f__Lactobacillaceae;g__Limosilactobacillus;s__Limosilactobacillus ingluviei	CELLULAR PROCESSES AND SIGNALING	O	Posttranslational modification, protein turnover, chaperones	57
MAG1085	d__Bacteria;p__Bacillota;c__Bacilli;o__Lactobacillales;f__Lactobacillaceae;g__Limosilactobacillus;s__Limosilactobacillus ingluviei	CELLULAR PROCESSES AND SIGNALING	T	Signal transduction mechanisms	82
MAG1085	d__Bacteria;p__Bacillota;c__Bacilli;o__Lactobacillales;f__Lactobacillaceae;g__Limosilactobacillus;s__Limosilactobacillus ingluviei	CELLULAR PROCESSES AND SIGNALING	U	Intracellular trafficking, secretion, and vesicular transport	19
MAG1085	d__Bacteria;p__Bacillota;c__Bacilli;o__Lactobacillales;f__Lactobacillaceae;g__Limosilactobacillus;s__Limosilactobacillus ingluviei	CELLULAR PROCESSES AND SIGNALING	V	Defense mechanisms	26
MAG1085	d__Bacteria;p__Bacillota;c__Bacilli;o__Lactobacillales;f__Lactobacillaceae;g__Limosilactobacillus;s__Limosilactobacillus ingluviei	CELLULAR PROCESSES AND SIGNALING	W	Extracellular structures	3
MAG1085	d__Bacteria;p__Bacillota;c__Bacilli;o__Lactobacillales;f__Lactobacillaceae;g__Limosilactobacillus;s__Limosilactobacillus ingluviei	CELLULAR PROCESSES AND SIGNALING	X	Mobilome: prophages, transposons	13
MAG1085	d__Bacteria;p__Bacillota;c__Bacilli;o__Lactobacillales;f__Lactobacillaceae;g__Limosilactobacillus;s__Limosilactobacillus ingluviei	CELLULAR PROCESSES AND SIGNALING	Z	Cytoskeleton	4
MAG1085	d__Bacteria;p__Bacillota;c__Bacilli;o__Lactobacillales;f__Lactobacillaceae;g__Limosilactobacillus;s__Limosilactobacillus ingluviei	INFORMATION STORAGE AND PROCESSING	J	Translation, ribosomal structure and biogenesis	174
MAG1085	d__Bacteria;p__Bacillota;c__Bacilli;o__Lactobacillales;f__Lactobacillaceae;g__Limosilactobacillus;s__Limosilactobacillus ingluviei	INFORMATION STORAGE AND PROCESSING	K	Transcription	123
MAG1085	d__Bacteria;p__Bacillota;c__Bacilli;o__Lactobacillales;f__Lactobacillaceae;g__Limosilactobacillus;s__Limosilactobacillus ingluviei	INFORMATION STORAGE AND PROCESSING	L	Replication, recombination and repair	114
MAG1085	d__Bacteria;p__Bacillota;c__Bacilli;o__Lactobacillales;f__Lactobacillaceae;g__Limosilactobacillus;s__Limosilactobacillus ingluviei	METABOLISM	C	Energy production and conversion	77
MAG1085	d__Bacteria;p__Bacillota;c__Bacilli;o__Lactobacillales;f__Lactobacillaceae;g__Limosilactobacillus;s__Limosilactobacillus ingluviei	METABOLISM	E	Amino acid transport and metabolism	169
MAG1085	d__Bacteria;p__Bacillota;c__Bacilli;o__Lactobacillales;f__Lactobacillaceae;g__Limosilactobacillus;s__Limosilactobacillus ingluviei	METABOLISM	F	Nucleotide transport and metabolism	99
MAG1085	d__Bacteria;p__Bacillota;c__Bacilli;o__Lactobacillales;f__Lactobacillaceae;g__Limosilactobacillus;s__Limosilactobacillus ingluviei	METABOLISM	G	Carbohydrate transport and metabolism	129
MAG1085	d__Bacteria;p__Bacillota;c__Bacilli;o__Lactobacillales;f__Lactobacillaceae;g__Limosilactobacillus;s__Limosilactobacillus ingluviei	METABOLISM	H	Coenzyme transport and metabolism	107
MAG1085	d__Bacteria;p__Bacillota;c__Bacilli;o__Lactobacillales;f__Lactobacillaceae;g__Limosilactobacillus;s__Limosilactobacillus ingluviei	METABOLISM	I	Lipid transport and metabolism	64
MAG1085	d__Bacteria;p__Bacillota;c__Bacilli;o__Lactobacillales;f__Lactobacillaceae;g__Limosilactobacillus;s__Limosilactobacillus ingluviei	METABOLISM	P	Inorganic ion transport and metabolism	72
MAG1085	d__Bacteria;p__Bacillota;c__Bacilli;o__Lactobacillales;f__Lactobacillaceae;g__Limosilactobacillus;s__Limosilactobacillus ingluviei	METABOLISM	Q	Secondary metabolites biosynthesis, transport and catabolism	16
MAG1085	d__Bacteria;p__Bacillota;c__Bacilli;o__Lactobacillales;f__Lactobacillaceae;g__Limosilactobacillus;s__Limosilactobacillus ingluviei	POORLY CHARACTERIZED	R	General function prediction only	144
MAG1085	d__Bacteria;p__Bacillota;c__Bacilli;o__Lactobacillales;f__Lactobacillaceae;g__Limosilactobacillus;s__Limosilactobacillus ingluviei	POORLY CHARACTERIZED	S	Function unknown	54
MAG1087	d__Bacteria;p__Pseudomonadota;c__Alphaproteobacteria;o__Rhizobiales;f__Xanthobacteraceae;g__Bradyrhizobium;s__Unclassified	CELLULAR PROCESSES AND SIGNALING	D	Cell cycle control, cell division, chromosome partitioning	50
MAG1087	d__Bacteria;p__Pseudomonadota;c__Alphaproteobacteria;o__Rhizobiales;f__Xanthobacteraceae;g__Bradyrhizobium;s__Unclassified	CELLULAR PROCESSES AND SIGNALING	M	Cell wall/membrane/envelope biogenesis	261
MAG1087	d__Bacteria;p__Pseudomonadota;c__Alphaproteobacteria;o__Rhizobiales;f__Xanthobacteraceae;g__Bradyrhizobium;s__Unclassified	CELLULAR PROCESSES AND SIGNALING	N	Cell motility	59
MAG1087	d__Bacteria;p__Pseudomonadota;c__Alphaproteobacteria;o__Rhizobiales;f__Xanthobacteraceae;g__Bradyrhizobium;s__Unclassified	CELLULAR PROCESSES AND SIGNALING	O	Posttranslational modification, protein turnover, chaperones	204
MAG1087	d__Bacteria;p__Pseudomonadota;c__Alphaproteobacteria;o__Rhizobiales;f__Xanthobacteraceae;g__Bradyrhizobium;s__Unclassified	CELLULAR PROCESSES AND SIGNALING	T	Signal transduction mechanisms	236
MAG1087	d__Bacteria;p__Pseudomonadota;c__Alphaproteobacteria;o__Rhizobiales;f__Xanthobacteraceae;g__Bradyrhizobium;s__Unclassified	CELLULAR PROCESSES AND SIGNALING	U	Intracellular trafficking, secretion, and vesicular transport	64
MAG1087	d__Bacteria;p__Pseudomonadota;c__Alphaproteobacteria;o__Rhizobiales;f__Xanthobacteraceae;g__Bradyrhizobium;s__Unclassified	CELLULAR PROCESSES AND SIGNALING	V	Defense mechanisms	96
MAG1087	d__Bacteria;p__Pseudomonadota;c__Alphaproteobacteria;o__Rhizobiales;f__Xanthobacteraceae;g__Bradyrhizobium;s__Unclassified	CELLULAR PROCESSES AND SIGNALING	W	Extracellular structures	30
MAG1087	d__Bacteria;p__Pseudomonadota;c__Alphaproteobacteria;o__Rhizobiales;f__Xanthobacteraceae;g__Bradyrhizobium;s__Unclassified	CELLULAR PROCESSES AND SIGNALING	X	Mobilome: prophages, transposons	17
MAG1087	d__Bacteria;p__Pseudomonadota;c__Alphaproteobacteria;o__Rhizobiales;f__Xanthobacteraceae;g__Bradyrhizobium;s__Unclassified	INFORMATION STORAGE AND PROCESSING	J	Translation, ribosomal structure and biogenesis	209
MAG1087	d__Bacteria;p__Pseudomonadota;c__Alphaproteobacteria;o__Rhizobiales;f__Xanthobacteraceae;g__Bradyrhizobium;s__Unclassified	INFORMATION STORAGE AND PROCESSING	K	Transcription	160
MAG1087	d__Bacteria;p__Pseudomonadota;c__Alphaproteobacteria;o__Rhizobiales;f__Xanthobacteraceae;g__Bradyrhizobium;s__Unclassified	INFORMATION STORAGE AND PROCESSING	L	Replication, recombination and repair	126
MAG1087	d__Bacteria;p__Pseudomonadota;c__Alphaproteobacteria;o__Rhizobiales;f__Xanthobacteraceae;g__Bradyrhizobium;s__Unclassified	METABOLISM	C	Energy production and conversion	309
MAG1087	d__Bacteria;p__Pseudomonadota;c__Alphaproteobacteria;o__Rhizobiales;f__Xanthobacteraceae;g__Bradyrhizobium;s__Unclassified	METABOLISM	E	Amino acid transport and metabolism	478
MAG1087	d__Bacteria;p__Pseudomonadota;c__Alphaproteobacteria;o__Rhizobiales;f__Xanthobacteraceae;g__Bradyrhizobium;s__Unclassified	METABOLISM	F	Nucleotide transport and metabolism	75
MAG1087	d__Bacteria;p__Pseudomonadota;c__Alphaproteobacteria;o__Rhizobiales;f__Xanthobacteraceae;g__Bradyrhizobium;s__Unclassified	METABOLISM	G	Carbohydrate transport and metabolism	270
MAG1087	d__Bacteria;p__Pseudomonadota;c__Alphaproteobacteria;o__Rhizobiales;f__Xanthobacteraceae;g__Bradyrhizobium;s__Unclassified	METABOLISM	H	Coenzyme transport and metabolism	244
MAG1087	d__Bacteria;p__Pseudomonadota;c__Alphaproteobacteria;o__Rhizobiales;f__Xanthobacteraceae;g__Bradyrhizobium;s__Unclassified	METABOLISM	I	Lipid transport and metabolism	307
MAG1087	d__Bacteria;p__Pseudomonadota;c__Alphaproteobacteria;o__Rhizobiales;f__Xanthobacteraceae;g__Bradyrhizobium;s__Unclassified	METABOLISM	P	Inorganic ion transport and metabolism	212
MAG1087	d__Bacteria;p__Pseudomonadota;c__Alphaproteobacteria;o__Rhizobiales;f__Xanthobacteraceae;g__Bradyrhizobium;s__Unclassified	METABOLISM	Q	Secondary metabolites biosynthesis, transport and catabolism	124
MAG1087	d__Bacteria;p__Pseudomonadota;c__Alphaproteobacteria;o__Rhizobiales;f__Xanthobacteraceae;g__Bradyrhizobium;s__Unclassified	POORLY CHARACTERIZED	R	General function prediction only	333
MAG1087	d__Bacteria;p__Pseudomonadota;c__Alphaproteobacteria;o__Rhizobiales;f__Xanthobacteraceae;g__Bradyrhizobium;s__Unclassified	POORLY CHARACTERIZED	S	Function unknown	194
MAG1088	d__Bacteria;p__Dormibacterota;c__Dormibacteria;o__Dormibacterales;f__Dormibacteraceae;g__Unclassified;s__Unclassified	CELLULAR PROCESSES AND SIGNALING	D	Cell cycle control, cell division, chromosome partitioning	31
MAG1088	d__Bacteria;p__Dormibacterota;c__Dormibacteria;o__Dormibacterales;f__Dormibacteraceae;g__Unclassified;s__Unclassified	CELLULAR PROCESSES AND SIGNALING	M	Cell wall/membrane/envelope biogenesis	156
MAG1088	d__Bacteria;p__Dormibacterota;c__Dormibacteria;o__Dormibacterales;f__Dormibacteraceae;g__Unclassified;s__Unclassified	CELLULAR PROCESSES AND SIGNALING	N	Cell motility	12
MAG1088	d__Bacteria;p__Dormibacterota;c__Dormibacteria;o__Dormibacterales;f__Dormibacteraceae;g__Unclassified;s__Unclassified	CELLULAR PROCESSES AND SIGNALING	O	Posttranslational modification, protein turnover, chaperones	100
MAG1088	d__Bacteria;p__Dormibacterota;c__Dormibacteria;o__Dormibacterales;f__Dormibacteraceae;g__Unclassified;s__Unclassified	CELLULAR PROCESSES AND SIGNALING	T	Signal transduction mechanisms	119
MAG1088	d__Bacteria;p__Dormibacterota;c__Dormibacteria;o__Dormibacterales;f__Dormibacteraceae;g__Unclassified;s__Unclassified	CELLULAR PROCESSES AND SIGNALING	U	Intracellular trafficking, secretion, and vesicular transport	24
MAG1088	d__Bacteria;p__Dormibacterota;c__Dormibacteria;o__Dormibacterales;f__Dormibacteraceae;g__Unclassified;s__Unclassified	CELLULAR PROCESSES AND SIGNALING	V	Defense mechanisms	40
MAG1088	d__Bacteria;p__Dormibacterota;c__Dormibacteria;o__Dormibacterales;f__Dormibacteraceae;g__Unclassified;s__Unclassified	CELLULAR PROCESSES AND SIGNALING	W	Extracellular structures	6
MAG1088	d__Bacteria;p__Dormibacterota;c__Dormibacteria;o__Dormibacterales;f__Dormibacteraceae;g__Unclassified;s__Unclassified	CELLULAR PROCESSES AND SIGNALING	X	Mobilome: prophages, transposons	5
MAG1088	d__Bacteria;p__Dormibacterota;c__Dormibacteria;o__Dormibacterales;f__Dormibacteraceae;g__Unclassified;s__Unclassified	CELLULAR PROCESSES AND SIGNALING	Z	Cytoskeleton	4
MAG1088	d__Bacteria;p__Dormibacterota;c__Dormibacteria;o__Dormibacterales;f__Dormibacteraceae;g__Unclassified;s__Unclassified	INFORMATION STORAGE AND PROCESSING	J	Translation, ribosomal structure and biogenesis	147
MAG1088	d__Bacteria;p__Dormibacterota;c__Dormibacteria;o__Dormibacterales;f__Dormibacteraceae;g__Unclassified;s__Unclassified	INFORMATION STORAGE AND PROCESSING	K	Transcription	136
MAG1088	d__Bacteria;p__Dormibacterota;c__Dormibacteria;o__Dormibacterales;f__Dormibacteraceae;g__Unclassified;s__Unclassified	INFORMATION STORAGE AND PROCESSING	L	Replication, recombination and repair	93
MAG1088	d__Bacteria;p__Dormibacterota;c__Dormibacteria;o__Dormibacterales;f__Dormibacteraceae;g__Unclassified;s__Unclassified	METABOLISM	C	Energy production and conversion	149
MAG1088	d__Bacteria;p__Dormibacterota;c__Dormibacteria;o__Dormibacterales;f__Dormibacteraceae;g__Unclassified;s__Unclassified	METABOLISM	E	Amino acid transport and metabolism	237
MAG1088	d__Bacteria;p__Dormibacterota;c__Dormibacteria;o__Dormibacterales;f__Dormibacteraceae;g__Unclassified;s__Unclassified	METABOLISM	F	Nucleotide transport and metabolism	84
MAG1088	d__Bacteria;p__Dormibacterota;c__Dormibacteria;o__Dormibacterales;f__Dormibacteraceae;g__Unclassified;s__Unclassified	METABOLISM	G	Carbohydrate transport and metabolism	142
MAG1088	d__Bacteria;p__Dormibacterota;c__Dormibacteria;o__Dormibacterales;f__Dormibacteraceae;g__Unclassified;s__Unclassified	METABOLISM	H	Coenzyme transport and metabolism	167
MAG1088	d__Bacteria;p__Dormibacterota;c__Dormibacteria;o__Dormibacterales;f__Dormibacteraceae;g__Unclassified;s__Unclassified	METABOLISM	I	Lipid transport and metabolism	208
MAG1088	d__Bacteria;p__Dormibacterota;c__Dormibacteria;o__Dormibacterales;f__Dormibacteraceae;g__Unclassified;s__Unclassified	METABOLISM	P	Inorganic ion transport and metabolism	107
MAG1088	d__Bacteria;p__Dormibacterota;c__Dormibacteria;o__Dormibacterales;f__Dormibacteraceae;g__Unclassified;s__Unclassified	METABOLISM	Q	Secondary metabolites biosynthesis, transport and catabolism	35
MAG1088	d__Bacteria;p__Dormibacterota;c__Dormibacteria;o__Dormibacterales;f__Dormibacteraceae;g__Unclassified;s__Unclassified	POORLY CHARACTERIZED	R	General function prediction only	182
MAG1088	d__Bacteria;p__Dormibacterota;c__Dormibacteria;o__Dormibacterales;f__Dormibacteraceae;g__Unclassified;s__Unclassified	POORLY CHARACTERIZED	S	Function unknown	43
MAG1089	d__Bacteria;p__Actinomycetota;c__Thermoleophilia;o__Gaiellales;f__Gaiellaceae;g__JACCRW01;s__Unclassified	CELLULAR PROCESSES AND SIGNALING	D	Cell cycle control, cell division, chromosome partitioning	31
MAG1089	d__Bacteria;p__Actinomycetota;c__Thermoleophilia;o__Gaiellales;f__Gaiellaceae;g__JACCRW01;s__Unclassified	CELLULAR PROCESSES AND SIGNALING	M	Cell wall/membrane/envelope biogenesis	148
MAG1089	d__Bacteria;p__Actinomycetota;c__Thermoleophilia;o__Gaiellales;f__Gaiellaceae;g__JACCRW01;s__Unclassified	CELLULAR PROCESSES AND SIGNALING	N	Cell motility	12
MAG1089	d__Bacteria;p__Actinomycetota;c__Thermoleophilia;o__Gaiellales;f__Gaiellaceae;g__JACCRW01;s__Unclassified	CELLULAR PROCESSES AND SIGNALING	O	Posttranslational modification, protein turnover, chaperones	123
MAG1089	d__Bacteria;p__Actinomycetota;c__Thermoleophilia;o__Gaiellales;f__Gaiellaceae;g__JACCRW01;s__Unclassified	CELLULAR PROCESSES AND SIGNALING	T	Signal transduction mechanisms	174
MAG1089	d__Bacteria;p__Actinomycetota;c__Thermoleophilia;o__Gaiellales;f__Gaiellaceae;g__JACCRW01;s__Unclassified	CELLULAR PROCESSES AND SIGNALING	U	Intracellular trafficking, secretion, and vesicular transport	25
MAG1089	d__Bacteria;p__Actinomycetota;c__Thermoleophilia;o__Gaiellales;f__Gaiellaceae;g__JACCRW01;s__Unclassified	CELLULAR PROCESSES AND SIGNALING	V	Defense mechanisms	45
MAG1089	d__Bacteria;p__Actinomycetota;c__Thermoleophilia;o__Gaiellales;f__Gaiellaceae;g__JACCRW01;s__Unclassified	CELLULAR PROCESSES AND SIGNALING	W	Extracellular structures	11
MAG1089	d__Bacteria;p__Actinomycetota;c__Thermoleophilia;o__Gaiellales;f__Gaiellaceae;g__JACCRW01;s__Unclassified	CELLULAR PROCESSES AND SIGNALING	X	Mobilome: prophages, transposons	3
MAG1089	d__Bacteria;p__Actinomycetota;c__Thermoleophilia;o__Gaiellales;f__Gaiellaceae;g__JACCRW01;s__Unclassified	CELLULAR PROCESSES AND SIGNALING	Z	Cytoskeleton	1
MAG1089	d__Bacteria;p__Actinomycetota;c__Thermoleophilia;o__Gaiellales;f__Gaiellaceae;g__JACCRW01;s__Unclassified	INFORMATION STORAGE AND PROCESSING	J	Translation, ribosomal structure and biogenesis	154
MAG1089	d__Bacteria;p__Actinomycetota;c__Thermoleophilia;o__Gaiellales;f__Gaiellaceae;g__JACCRW01;s__Unclassified	INFORMATION STORAGE AND PROCESSING	K	Transcription	131
MAG1089	d__Bacteria;p__Actinomycetota;c__Thermoleophilia;o__Gaiellales;f__Gaiellaceae;g__JACCRW01;s__Unclassified	INFORMATION STORAGE AND PROCESSING	L	Replication, recombination and repair	101
MAG1089	d__Bacteria;p__Actinomycetota;c__Thermoleophilia;o__Gaiellales;f__Gaiellaceae;g__JACCRW01;s__Unclassified	METABOLISM	C	Energy production and conversion	126
MAG1089	d__Bacteria;p__Actinomycetota;c__Thermoleophilia;o__Gaiellales;f__Gaiellaceae;g__JACCRW01;s__Unclassified	METABOLISM	E	Amino acid transport and metabolism	236
MAG1089	d__Bacteria;p__Actinomycetota;c__Thermoleophilia;o__Gaiellales;f__Gaiellaceae;g__JACCRW01;s__Unclassified	METABOLISM	F	Nucleotide transport and metabolism	85
MAG1089	d__Bacteria;p__Actinomycetota;c__Thermoleophilia;o__Gaiellales;f__Gaiellaceae;g__JACCRW01;s__Unclassified	METABOLISM	G	Carbohydrate transport and metabolism	131
MAG1089	d__Bacteria;p__Actinomycetota;c__Thermoleophilia;o__Gaiellales;f__Gaiellaceae;g__JACCRW01;s__Unclassified	METABOLISM	H	Coenzyme transport and metabolism	126
MAG1089	d__Bacteria;p__Actinomycetota;c__Thermoleophilia;o__Gaiellales;f__Gaiellaceae;g__JACCRW01;s__Unclassified	METABOLISM	I	Lipid transport and metabolism	128
MAG1089	d__Bacteria;p__Actinomycetota;c__Thermoleophilia;o__Gaiellales;f__Gaiellaceae;g__JACCRW01;s__Unclassified	METABOLISM	P	Inorganic ion transport and metabolism	86
MAG1089	d__Bacteria;p__Actinomycetota;c__Thermoleophilia;o__Gaiellales;f__Gaiellaceae;g__JACCRW01;s__Unclassified	METABOLISM	Q	Secondary metabolites biosynthesis, transport and catabolism	37
MAG1089	d__Bacteria;p__Actinomycetota;c__Thermoleophilia;o__Gaiellales;f__Gaiellaceae;g__JACCRW01;s__Unclassified	POORLY CHARACTERIZED	R	General function prediction only	199
MAG1089	d__Bacteria;p__Actinomycetota;c__Thermoleophilia;o__Gaiellales;f__Gaiellaceae;g__JACCRW01;s__Unclassified	POORLY CHARACTERIZED	S	Function unknown	56
MAG1091	d__Bacteria;p__Armatimonadota;c__Fimbriimonadia;o__Fimbriimonadales;f__Fimbriimonadaceae;g__Unclassified;s__Unclassified	CELLULAR PROCESSES AND SIGNALING	D	Cell cycle control, cell division, chromosome partitioning	54
MAG1091	d__Bacteria;p__Armatimonadota;c__Fimbriimonadia;o__Fimbriimonadales;f__Fimbriimonadaceae;g__Unclassified;s__Unclassified	CELLULAR PROCESSES AND SIGNALING	M	Cell wall/membrane/envelope biogenesis	290
MAG1091	d__Bacteria;p__Armatimonadota;c__Fimbriimonadia;o__Fimbriimonadales;f__Fimbriimonadaceae;g__Unclassified;s__Unclassified	CELLULAR PROCESSES AND SIGNALING	N	Cell motility	71
MAG1091	d__Bacteria;p__Armatimonadota;c__Fimbriimonadia;o__Fimbriimonadales;f__Fimbriimonadaceae;g__Unclassified;s__Unclassified	CELLULAR PROCESSES AND SIGNALING	O	Posttranslational modification, protein turnover, chaperones	228
MAG1091	d__Bacteria;p__Armatimonadota;c__Fimbriimonadia;o__Fimbriimonadales;f__Fimbriimonadaceae;g__Unclassified;s__Unclassified	CELLULAR PROCESSES AND SIGNALING	T	Signal transduction mechanisms	230
MAG1091	d__Bacteria;p__Armatimonadota;c__Fimbriimonadia;o__Fimbriimonadales;f__Fimbriimonadaceae;g__Unclassified;s__Unclassified	CELLULAR PROCESSES AND SIGNALING	U	Intracellular trafficking, secretion, and vesicular transport	75
MAG1091	d__Bacteria;p__Armatimonadota;c__Fimbriimonadia;o__Fimbriimonadales;f__Fimbriimonadaceae;g__Unclassified;s__Unclassified	CELLULAR PROCESSES AND SIGNALING	V	Defense mechanisms	91
MAG1091	d__Bacteria;p__Armatimonadota;c__Fimbriimonadia;o__Fimbriimonadales;f__Fimbriimonadaceae;g__Unclassified;s__Unclassified	CELLULAR PROCESSES AND SIGNALING	W	Extracellular structures	59
MAG1091	d__Bacteria;p__Armatimonadota;c__Fimbriimonadia;o__Fimbriimonadales;f__Fimbriimonadaceae;g__Unclassified;s__Unclassified	CELLULAR PROCESSES AND SIGNALING	X	Mobilome: prophages, transposons	64
MAG1091	d__Bacteria;p__Armatimonadota;c__Fimbriimonadia;o__Fimbriimonadales;f__Fimbriimonadaceae;g__Unclassified;s__Unclassified	CELLULAR PROCESSES AND SIGNALING	Z	Cytoskeleton	6
MAG1091	d__Bacteria;p__Armatimonadota;c__Fimbriimonadia;o__Fimbriimonadales;f__Fimbriimonadaceae;g__Unclassified;s__Unclassified	INFORMATION STORAGE AND PROCESSING	A	RNA processing and modification	1
MAG1091	d__Bacteria;p__Armatimonadota;c__Fimbriimonadia;o__Fimbriimonadales;f__Fimbriimonadaceae;g__Unclassified;s__Unclassified	INFORMATION STORAGE AND PROCESSING	J	Translation, ribosomal structure and biogenesis	216
MAG1091	d__Bacteria;p__Armatimonadota;c__Fimbriimonadia;o__Fimbriimonadales;f__Fimbriimonadaceae;g__Unclassified;s__Unclassified	INFORMATION STORAGE AND PROCESSING	K	Transcription	191
MAG1091	d__Bacteria;p__Armatimonadota;c__Fimbriimonadia;o__Fimbriimonadales;f__Fimbriimonadaceae;g__Unclassified;s__Unclassified	INFORMATION STORAGE AND PROCESSING	L	Replication, recombination and repair	167
MAG1091	d__Bacteria;p__Armatimonadota;c__Fimbriimonadia;o__Fimbriimonadales;f__Fimbriimonadaceae;g__Unclassified;s__Unclassified	METABOLISM	C	Energy production and conversion	129
MAG1091	d__Bacteria;p__Armatimonadota;c__Fimbriimonadia;o__Fimbriimonadales;f__Fimbriimonadaceae;g__Unclassified;s__Unclassified	METABOLISM	E	Amino acid transport and metabolism	220
MAG1091	d__Bacteria;p__Armatimonadota;c__Fimbriimonadia;o__Fimbriimonadales;f__Fimbriimonadaceae;g__Unclassified;s__Unclassified	METABOLISM	F	Nucleotide transport and metabolism	78
MAG1091	d__Bacteria;p__Armatimonadota;c__Fimbriimonadia;o__Fimbriimonadales;f__Fimbriimonadaceae;g__Unclassified;s__Unclassified	METABOLISM	G	Carbohydrate transport and metabolism	172
MAG1091	d__Bacteria;p__Armatimonadota;c__Fimbriimonadia;o__Fimbriimonadales;f__Fimbriimonadaceae;g__Unclassified;s__Unclassified	METABOLISM	H	Coenzyme transport and metabolism	127
MAG1091	d__Bacteria;p__Armatimonadota;c__Fimbriimonadia;o__Fimbriimonadales;f__Fimbriimonadaceae;g__Unclassified;s__Unclassified	METABOLISM	I	Lipid transport and metabolism	96
MAG1091	d__Bacteria;p__Armatimonadota;c__Fimbriimonadia;o__Fimbriimonadales;f__Fimbriimonadaceae;g__Unclassified;s__Unclassified	METABOLISM	P	Inorganic ion transport and metabolism	106
MAG1091	d__Bacteria;p__Armatimonadota;c__Fimbriimonadia;o__Fimbriimonadales;f__Fimbriimonadaceae;g__Unclassified;s__Unclassified	METABOLISM	Q	Secondary metabolites biosynthesis, transport and catabolism	73
MAG1091	d__Bacteria;p__Armatimonadota;c__Fimbriimonadia;o__Fimbriimonadales;f__Fimbriimonadaceae;g__Unclassified;s__Unclassified	POORLY CHARACTERIZED	R	General function prediction only	267
MAG1091	d__Bacteria;p__Armatimonadota;c__Fimbriimonadia;o__Fimbriimonadales;f__Fimbriimonadaceae;g__Unclassified;s__Unclassified	POORLY CHARACTERIZED	S	Function unknown	126
MAG1093	d__Bacteria;p__Pseudomonadota;c__Alphaproteobacteria;o__Sphingomonadales;f__Sphingomonadaceae;g__Sphingomicrobium;s__Unclassified	CELLULAR PROCESSES AND SIGNALING	D	Cell cycle control, cell division, chromosome partitioning	43
MAG1093	d__Bacteria;p__Pseudomonadota;c__Alphaproteobacteria;o__Sphingomonadales;f__Sphingomonadaceae;g__Sphingomicrobium;s__Unclassified	CELLULAR PROCESSES AND SIGNALING	M	Cell wall/membrane/envelope biogenesis	171
MAG1093	d__Bacteria;p__Pseudomonadota;c__Alphaproteobacteria;o__Sphingomonadales;f__Sphingomonadaceae;g__Sphingomicrobium;s__Unclassified	CELLULAR PROCESSES AND SIGNALING	N	Cell motility	12
MAG1093	d__Bacteria;p__Pseudomonadota;c__Alphaproteobacteria;o__Sphingomonadales;f__Sphingomonadaceae;g__Sphingomicrobium;s__Unclassified	CELLULAR PROCESSES AND SIGNALING	O	Posttranslational modification, protein turnover, chaperones	161
MAG1093	d__Bacteria;p__Pseudomonadota;c__Alphaproteobacteria;o__Sphingomonadales;f__Sphingomonadaceae;g__Sphingomicrobium;s__Unclassified	CELLULAR PROCESSES AND SIGNALING	T	Signal transduction mechanisms	139
MAG1093	d__Bacteria;p__Pseudomonadota;c__Alphaproteobacteria;o__Sphingomonadales;f__Sphingomonadaceae;g__Sphingomicrobium;s__Unclassified	CELLULAR PROCESSES AND SIGNALING	U	Intracellular trafficking, secretion, and vesicular transport	51
MAG1093	d__Bacteria;p__Pseudomonadota;c__Alphaproteobacteria;o__Sphingomonadales;f__Sphingomonadaceae;g__Sphingomicrobium;s__Unclassified	CELLULAR PROCESSES AND SIGNALING	V	Defense mechanisms	64
MAG1093	d__Bacteria;p__Pseudomonadota;c__Alphaproteobacteria;o__Sphingomonadales;f__Sphingomonadaceae;g__Sphingomicrobium;s__Unclassified	CELLULAR PROCESSES AND SIGNALING	W	Extracellular structures	34
MAG1093	d__Bacteria;p__Pseudomonadota;c__Alphaproteobacteria;o__Sphingomonadales;f__Sphingomonadaceae;g__Sphingomicrobium;s__Unclassified	CELLULAR PROCESSES AND SIGNALING	X	Mobilome: prophages, transposons	12
MAG1093	d__Bacteria;p__Pseudomonadota;c__Alphaproteobacteria;o__Sphingomonadales;f__Sphingomonadaceae;g__Sphingomicrobium;s__Unclassified	CELLULAR PROCESSES AND SIGNALING	Z	Cytoskeleton	5
MAG1093	d__Bacteria;p__Pseudomonadota;c__Alphaproteobacteria;o__Sphingomonadales;f__Sphingomonadaceae;g__Sphingomicrobium;s__Unclassified	INFORMATION STORAGE AND PROCESSING	B	Chromatin structure and dynamics	1
MAG1093	d__Bacteria;p__Pseudomonadota;c__Alphaproteobacteria;o__Sphingomonadales;f__Sphingomonadaceae;g__Sphingomicrobium;s__Unclassified	INFORMATION STORAGE AND PROCESSING	J	Translation, ribosomal structure and biogenesis	170
MAG1093	d__Bacteria;p__Pseudomonadota;c__Alphaproteobacteria;o__Sphingomonadales;f__Sphingomonadaceae;g__Sphingomicrobium;s__Unclassified	INFORMATION STORAGE AND PROCESSING	K	Transcription	118
MAG1093	d__Bacteria;p__Pseudomonadota;c__Alphaproteobacteria;o__Sphingomonadales;f__Sphingomonadaceae;g__Sphingomicrobium;s__Unclassified	INFORMATION STORAGE AND PROCESSING	L	Replication, recombination and repair	116
MAG1093	d__Bacteria;p__Pseudomonadota;c__Alphaproteobacteria;o__Sphingomonadales;f__Sphingomonadaceae;g__Sphingomicrobium;s__Unclassified	METABOLISM	C	Energy production and conversion	152
MAG1093	d__Bacteria;p__Pseudomonadota;c__Alphaproteobacteria;o__Sphingomonadales;f__Sphingomonadaceae;g__Sphingomicrobium;s__Unclassified	METABOLISM	E	Amino acid transport and metabolism	150
MAG1093	d__Bacteria;p__Pseudomonadota;c__Alphaproteobacteria;o__Sphingomonadales;f__Sphingomonadaceae;g__Sphingomicrobium;s__Unclassified	METABOLISM	F	Nucleotide transport and metabolism	60
MAG1093	d__Bacteria;p__Pseudomonadota;c__Alphaproteobacteria;o__Sphingomonadales;f__Sphingomonadaceae;g__Sphingomicrobium;s__Unclassified	METABOLISM	G	Carbohydrate transport and metabolism	113
MAG1093	d__Bacteria;p__Pseudomonadota;c__Alphaproteobacteria;o__Sphingomonadales;f__Sphingomonadaceae;g__Sphingomicrobium;s__Unclassified	METABOLISM	H	Coenzyme transport and metabolism	141
MAG1093	d__Bacteria;p__Pseudomonadota;c__Alphaproteobacteria;o__Sphingomonadales;f__Sphingomonadaceae;g__Sphingomicrobium;s__Unclassified	METABOLISM	I	Lipid transport and metabolism	134
MAG1093	d__Bacteria;p__Pseudomonadota;c__Alphaproteobacteria;o__Sphingomonadales;f__Sphingomonadaceae;g__Sphingomicrobium;s__Unclassified	METABOLISM	P	Inorganic ion transport and metabolism	90
MAG1093	d__Bacteria;p__Pseudomonadota;c__Alphaproteobacteria;o__Sphingomonadales;f__Sphingomonadaceae;g__Sphingomicrobium;s__Unclassified	METABOLISM	Q	Secondary metabolites biosynthesis, transport and catabolism	50
MAG1093	d__Bacteria;p__Pseudomonadota;c__Alphaproteobacteria;o__Sphingomonadales;f__Sphingomonadaceae;g__Sphingomicrobium;s__Unclassified	POORLY CHARACTERIZED	R	General function prediction only	181
MAG1093	d__Bacteria;p__Pseudomonadota;c__Alphaproteobacteria;o__Sphingomonadales;f__Sphingomonadaceae;g__Sphingomicrobium;s__Unclassified	POORLY CHARACTERIZED	S	Function unknown	115
MAG1097	d__Bacteria;p__Actinomycetota;c__Actinomycetia;o__Actinomycetales;f__Micrococcaceae;g__Arthrobacter_H;s__Arthrobacter_H sp016892645	CELLULAR PROCESSES AND SIGNALING	D	Cell cycle control, cell division, chromosome partitioning	29
MAG1097	d__Bacteria;p__Actinomycetota;c__Actinomycetia;o__Actinomycetales;f__Micrococcaceae;g__Arthrobacter_H;s__Arthrobacter_H sp016892645	CELLULAR PROCESSES AND SIGNALING	M	Cell wall/membrane/envelope biogenesis	102
MAG1097	d__Bacteria;p__Actinomycetota;c__Actinomycetia;o__Actinomycetales;f__Micrococcaceae;g__Arthrobacter_H;s__Arthrobacter_H sp016892645	CELLULAR PROCESSES AND SIGNALING	N	Cell motility	18
MAG1097	d__Bacteria;p__Actinomycetota;c__Actinomycetia;o__Actinomycetales;f__Micrococcaceae;g__Arthrobacter_H;s__Arthrobacter_H sp016892645	CELLULAR PROCESSES AND SIGNALING	O	Posttranslational modification, protein turnover, chaperones	109
MAG1097	d__Bacteria;p__Actinomycetota;c__Actinomycetia;o__Actinomycetales;f__Micrococcaceae;g__Arthrobacter_H;s__Arthrobacter_H sp016892645	CELLULAR PROCESSES AND SIGNALING	T	Signal transduction mechanisms	96
MAG1097	d__Bacteria;p__Actinomycetota;c__Actinomycetia;o__Actinomycetales;f__Micrococcaceae;g__Arthrobacter_H;s__Arthrobacter_H sp016892645	CELLULAR PROCESSES AND SIGNALING	U	Intracellular trafficking, secretion, and vesicular transport	20
MAG1097	d__Bacteria;p__Actinomycetota;c__Actinomycetia;o__Actinomycetales;f__Micrococcaceae;g__Arthrobacter_H;s__Arthrobacter_H sp016892645	CELLULAR PROCESSES AND SIGNALING	V	Defense mechanisms	50
MAG1097	d__Bacteria;p__Actinomycetota;c__Actinomycetia;o__Actinomycetales;f__Micrococcaceae;g__Arthrobacter_H;s__Arthrobacter_H sp016892645	CELLULAR PROCESSES AND SIGNALING	W	Extracellular structures	4
MAG1097	d__Bacteria;p__Actinomycetota;c__Actinomycetia;o__Actinomycetales;f__Micrococcaceae;g__Arthrobacter_H;s__Arthrobacter_H sp016892645	CELLULAR PROCESSES AND SIGNALING	X	Mobilome: prophages, transposons	3
MAG1097	d__Bacteria;p__Actinomycetota;c__Actinomycetia;o__Actinomycetales;f__Micrococcaceae;g__Arthrobacter_H;s__Arthrobacter_H sp016892645	CELLULAR PROCESSES AND SIGNALING	Z	Cytoskeleton	1
MAG1097	d__Bacteria;p__Actinomycetota;c__Actinomycetia;o__Actinomycetales;f__Micrococcaceae;g__Arthrobacter_H;s__Arthrobacter_H sp016892645	INFORMATION STORAGE AND PROCESSING	J	Translation, ribosomal structure and biogenesis	140
MAG1097	d__Bacteria;p__Actinomycetota;c__Actinomycetia;o__Actinomycetales;f__Micrococcaceae;g__Arthrobacter_H;s__Arthrobacter_H sp016892645	INFORMATION STORAGE AND PROCESSING	K	Transcription	196
MAG1097	d__Bacteria;p__Actinomycetota;c__Actinomycetia;o__Actinomycetales;f__Micrococcaceae;g__Arthrobacter_H;s__Arthrobacter_H sp016892645	INFORMATION STORAGE AND PROCESSING	L	Replication, recombination and repair	94
MAG1097	d__Bacteria;p__Actinomycetota;c__Actinomycetia;o__Actinomycetales;f__Micrococcaceae;g__Arthrobacter_H;s__Arthrobacter_H sp016892645	METABOLISM	C	Energy production and conversion	148
MAG1097	d__Bacteria;p__Actinomycetota;c__Actinomycetia;o__Actinomycetales;f__Micrococcaceae;g__Arthrobacter_H;s__Arthrobacter_H sp016892645	METABOLISM	E	Amino acid transport and metabolism	248
MAG1097	d__Bacteria;p__Actinomycetota;c__Actinomycetia;o__Actinomycetales;f__Micrococcaceae;g__Arthrobacter_H;s__Arthrobacter_H sp016892645	METABOLISM	F	Nucleotide transport and metabolism	83
MAG1097	d__Bacteria;p__Actinomycetota;c__Actinomycetia;o__Actinomycetales;f__Micrococcaceae;g__Arthrobacter_H;s__Arthrobacter_H sp016892645	METABOLISM	G	Carbohydrate transport and metabolism	164
MAG1097	d__Bacteria;p__Actinomycetota;c__Actinomycetia;o__Actinomycetales;f__Micrococcaceae;g__Arthrobacter_H;s__Arthrobacter_H sp016892645	METABOLISM	H	Coenzyme transport and metabolism	149
MAG1097	d__Bacteria;p__Actinomycetota;c__Actinomycetia;o__Actinomycetales;f__Micrococcaceae;g__Arthrobacter_H;s__Arthrobacter_H sp016892645	METABOLISM	I	Lipid transport and metabolism	147
MAG1097	d__Bacteria;p__Actinomycetota;c__Actinomycetia;o__Actinomycetales;f__Micrococcaceae;g__Arthrobacter_H;s__Arthrobacter_H sp016892645	METABOLISM	P	Inorganic ion transport and metabolism	135
MAG1097	d__Bacteria;p__Actinomycetota;c__Actinomycetia;o__Actinomycetales;f__Micrococcaceae;g__Arthrobacter_H;s__Arthrobacter_H sp016892645	METABOLISM	Q	Secondary metabolites biosynthesis, transport and catabolism	55
MAG1097	d__Bacteria;p__Actinomycetota;c__Actinomycetia;o__Actinomycetales;f__Micrococcaceae;g__Arthrobacter_H;s__Arthrobacter_H sp016892645	POORLY CHARACTERIZED	R	General function prediction only	216
MAG1097	d__Bacteria;p__Actinomycetota;c__Actinomycetia;o__Actinomycetales;f__Micrococcaceae;g__Arthrobacter_H;s__Arthrobacter_H sp016892645	POORLY CHARACTERIZED	S	Function unknown	69
MAG1098	d__Bacteria;p__Pseudomonadota;c__Gammaproteobacteria;o__Pseudomonadales;f__Moraxellaceae;g__Acinetobacter;s__Acinetobacter brisouii	CELLULAR PROCESSES AND SIGNALING	D	Cell cycle control, cell division, chromosome partitioning	36
MAG1098	d__Bacteria;p__Pseudomonadota;c__Gammaproteobacteria;o__Pseudomonadales;f__Moraxellaceae;g__Acinetobacter;s__Acinetobacter brisouii	CELLULAR PROCESSES AND SIGNALING	M	Cell wall/membrane/envelope biogenesis	148
MAG1098	d__Bacteria;p__Pseudomonadota;c__Gammaproteobacteria;o__Pseudomonadales;f__Moraxellaceae;g__Acinetobacter;s__Acinetobacter brisouii	CELLULAR PROCESSES AND SIGNALING	N	Cell motility	22
MAG1098	d__Bacteria;p__Pseudomonadota;c__Gammaproteobacteria;o__Pseudomonadales;f__Moraxellaceae;g__Acinetobacter;s__Acinetobacter brisouii	CELLULAR PROCESSES AND SIGNALING	O	Posttranslational modification, protein turnover, chaperones	103
MAG1098	d__Bacteria;p__Pseudomonadota;c__Gammaproteobacteria;o__Pseudomonadales;f__Moraxellaceae;g__Acinetobacter;s__Acinetobacter brisouii	CELLULAR PROCESSES AND SIGNALING	T	Signal transduction mechanisms	116
MAG1098	d__Bacteria;p__Pseudomonadota;c__Gammaproteobacteria;o__Pseudomonadales;f__Moraxellaceae;g__Acinetobacter;s__Acinetobacter brisouii	CELLULAR PROCESSES AND SIGNALING	U	Intracellular trafficking, secretion, and vesicular transport	34
MAG1098	d__Bacteria;p__Pseudomonadota;c__Gammaproteobacteria;o__Pseudomonadales;f__Moraxellaceae;g__Acinetobacter;s__Acinetobacter brisouii	CELLULAR PROCESSES AND SIGNALING	V	Defense mechanisms	51
MAG1098	d__Bacteria;p__Pseudomonadota;c__Gammaproteobacteria;o__Pseudomonadales;f__Moraxellaceae;g__Acinetobacter;s__Acinetobacter brisouii	CELLULAR PROCESSES AND SIGNALING	W	Extracellular structures	13
MAG1098	d__Bacteria;p__Pseudomonadota;c__Gammaproteobacteria;o__Pseudomonadales;f__Moraxellaceae;g__Acinetobacter;s__Acinetobacter brisouii	CELLULAR PROCESSES AND SIGNALING	X	Mobilome: prophages, transposons	16
MAG1098	d__Bacteria;p__Pseudomonadota;c__Gammaproteobacteria;o__Pseudomonadales;f__Moraxellaceae;g__Acinetobacter;s__Acinetobacter brisouii	CELLULAR PROCESSES AND SIGNALING	Z	Cytoskeleton	2
MAG1098	d__Bacteria;p__Pseudomonadota;c__Gammaproteobacteria;o__Pseudomonadales;f__Moraxellaceae;g__Acinetobacter;s__Acinetobacter brisouii	INFORMATION STORAGE AND PROCESSING	A	RNA processing and modification	1
MAG1098	d__Bacteria;p__Pseudomonadota;c__Gammaproteobacteria;o__Pseudomonadales;f__Moraxellaceae;g__Acinetobacter;s__Acinetobacter brisouii	INFORMATION STORAGE AND PROCESSING	J	Translation, ribosomal structure and biogenesis	200
MAG1098	d__Bacteria;p__Pseudomonadota;c__Gammaproteobacteria;o__Pseudomonadales;f__Moraxellaceae;g__Acinetobacter;s__Acinetobacter brisouii	INFORMATION STORAGE AND PROCESSING	K	Transcription	140
MAG1098	d__Bacteria;p__Pseudomonadota;c__Gammaproteobacteria;o__Pseudomonadales;f__Moraxellaceae;g__Acinetobacter;s__Acinetobacter brisouii	INFORMATION STORAGE AND PROCESSING	L	Replication, recombination and repair	81
MAG1098	d__Bacteria;p__Pseudomonadota;c__Gammaproteobacteria;o__Pseudomonadales;f__Moraxellaceae;g__Acinetobacter;s__Acinetobacter brisouii	METABOLISM	C	Energy production and conversion	141
MAG1098	d__Bacteria;p__Pseudomonadota;c__Gammaproteobacteria;o__Pseudomonadales;f__Moraxellaceae;g__Acinetobacter;s__Acinetobacter brisouii	METABOLISM	E	Amino acid transport and metabolism	191
MAG1098	d__Bacteria;p__Pseudomonadota;c__Gammaproteobacteria;o__Pseudomonadales;f__Moraxellaceae;g__Acinetobacter;s__Acinetobacter brisouii	METABOLISM	F	Nucleotide transport and metabolism	70
MAG1098	d__Bacteria;p__Pseudomonadota;c__Gammaproteobacteria;o__Pseudomonadales;f__Moraxellaceae;g__Acinetobacter;s__Acinetobacter brisouii	METABOLISM	G	Carbohydrate transport and metabolism	87
MAG1098	d__Bacteria;p__Pseudomonadota;c__Gammaproteobacteria;o__Pseudomonadales;f__Moraxellaceae;g__Acinetobacter;s__Acinetobacter brisouii	METABOLISM	H	Coenzyme transport and metabolism	127
MAG1098	d__Bacteria;p__Pseudomonadota;c__Gammaproteobacteria;o__Pseudomonadales;f__Moraxellaceae;g__Acinetobacter;s__Acinetobacter brisouii	METABOLISM	I	Lipid transport and metabolism	143
MAG1098	d__Bacteria;p__Pseudomonadota;c__Gammaproteobacteria;o__Pseudomonadales;f__Moraxellaceae;g__Acinetobacter;s__Acinetobacter brisouii	METABOLISM	P	Inorganic ion transport and metabolism	128
MAG1098	d__Bacteria;p__Pseudomonadota;c__Gammaproteobacteria;o__Pseudomonadales;f__Moraxellaceae;g__Acinetobacter;s__Acinetobacter brisouii	METABOLISM	Q	Secondary metabolites biosynthesis, transport and catabolism	42
MAG1098	d__Bacteria;p__Pseudomonadota;c__Gammaproteobacteria;o__Pseudomonadales;f__Moraxellaceae;g__Acinetobacter;s__Acinetobacter brisouii	POORLY CHARACTERIZED	R	General function prediction only	139
MAG1098	d__Bacteria;p__Pseudomonadota;c__Gammaproteobacteria;o__Pseudomonadales;f__Moraxellaceae;g__Acinetobacter;s__Acinetobacter brisouii	POORLY CHARACTERIZED	S	Function unknown	67
MAG1099	d__Bacteria;p__Actinomycetota;c__Actinomycetia;o__Propionibacteriales;f__Propionibacteriaceae;g__Arachnia;s__Unclassified	CELLULAR PROCESSES AND SIGNALING	D	Cell cycle control, cell division, chromosome partitioning	31
MAG1099	d__Bacteria;p__Actinomycetota;c__Actinomycetia;o__Propionibacteriales;f__Propionibacteriaceae;g__Arachnia;s__Unclassified	CELLULAR PROCESSES AND SIGNALING	M	Cell wall/membrane/envelope biogenesis	151
MAG1099	d__Bacteria;p__Actinomycetota;c__Actinomycetia;o__Propionibacteriales;f__Propionibacteriaceae;g__Arachnia;s__Unclassified	CELLULAR PROCESSES AND SIGNALING	N	Cell motility	6
MAG1099	d__Bacteria;p__Actinomycetota;c__Actinomycetia;o__Propionibacteriales;f__Propionibacteriaceae;g__Arachnia;s__Unclassified	CELLULAR PROCESSES AND SIGNALING	O	Posttranslational modification, protein turnover, chaperones	119
MAG1099	d__Bacteria;p__Actinomycetota;c__Actinomycetia;o__Propionibacteriales;f__Propionibacteriaceae;g__Arachnia;s__Unclassified	CELLULAR PROCESSES AND SIGNALING	T	Signal transduction mechanisms	109
MAG1099	d__Bacteria;p__Actinomycetota;c__Actinomycetia;o__Propionibacteriales;f__Propionibacteriaceae;g__Arachnia;s__Unclassified	CELLULAR PROCESSES AND SIGNALING	U	Intracellular trafficking, secretion, and vesicular transport	24
MAG1099	d__Bacteria;p__Actinomycetota;c__Actinomycetia;o__Propionibacteriales;f__Propionibacteriaceae;g__Arachnia;s__Unclassified	CELLULAR PROCESSES AND SIGNALING	V	Defense mechanisms	72
MAG1099	d__Bacteria;p__Actinomycetota;c__Actinomycetia;o__Propionibacteriales;f__Propionibacteriaceae;g__Arachnia;s__Unclassified	CELLULAR PROCESSES AND SIGNALING	W	Extracellular structures	6
MAG1099	d__Bacteria;p__Actinomycetota;c__Actinomycetia;o__Propionibacteriales;f__Propionibacteriaceae;g__Arachnia;s__Unclassified	CELLULAR PROCESSES AND SIGNALING	X	Mobilome: prophages, transposons	24
MAG1099	d__Bacteria;p__Actinomycetota;c__Actinomycetia;o__Propionibacteriales;f__Propionibacteriaceae;g__Arachnia;s__Unclassified	INFORMATION STORAGE AND PROCESSING	J	Translation, ribosomal structure and biogenesis	193
MAG1099	d__Bacteria;p__Actinomycetota;c__Actinomycetia;o__Propionibacteriales;f__Propionibacteriaceae;g__Arachnia;s__Unclassified	INFORMATION STORAGE AND PROCESSING	K	Transcription	147
MAG1099	d__Bacteria;p__Actinomycetota;c__Actinomycetia;o__Propionibacteriales;f__Propionibacteriaceae;g__Arachnia;s__Unclassified	INFORMATION STORAGE AND PROCESSING	L	Replication, recombination and repair	115
MAG1099	d__Bacteria;p__Actinomycetota;c__Actinomycetia;o__Propionibacteriales;f__Propionibacteriaceae;g__Arachnia;s__Unclassified	METABOLISM	C	Energy production and conversion	140
MAG1099	d__Bacteria;p__Actinomycetota;c__Actinomycetia;o__Propionibacteriales;f__Propionibacteriaceae;g__Arachnia;s__Unclassified	METABOLISM	E	Amino acid transport and metabolism	189
MAG1099	d__Bacteria;p__Actinomycetota;c__Actinomycetia;o__Propionibacteriales;f__Propionibacteriaceae;g__Arachnia;s__Unclassified	METABOLISM	F	Nucleotide transport and metabolism	85
MAG1099	d__Bacteria;p__Actinomycetota;c__Actinomycetia;o__Propionibacteriales;f__Propionibacteriaceae;g__Arachnia;s__Unclassified	METABOLISM	G	Carbohydrate transport and metabolism	241
MAG1099	d__Bacteria;p__Actinomycetota;c__Actinomycetia;o__Propionibacteriales;f__Propionibacteriaceae;g__Arachnia;s__Unclassified	METABOLISM	H	Coenzyme transport and metabolism	139
MAG1099	d__Bacteria;p__Actinomycetota;c__Actinomycetia;o__Propionibacteriales;f__Propionibacteriaceae;g__Arachnia;s__Unclassified	METABOLISM	I	Lipid transport and metabolism	81
MAG1099	d__Bacteria;p__Actinomycetota;c__Actinomycetia;o__Propionibacteriales;f__Propionibacteriaceae;g__Arachnia;s__Unclassified	METABOLISM	P	Inorganic ion transport and metabolism	112
MAG1099	d__Bacteria;p__Actinomycetota;c__Actinomycetia;o__Propionibacteriales;f__Propionibacteriaceae;g__Arachnia;s__Unclassified	METABOLISM	Q	Secondary metabolites biosynthesis, transport and catabolism	25
MAG1099	d__Bacteria;p__Actinomycetota;c__Actinomycetia;o__Propionibacteriales;f__Propionibacteriaceae;g__Arachnia;s__Unclassified	POORLY CHARACTERIZED	R	General function prediction only	177
MAG1099	d__Bacteria;p__Actinomycetota;c__Actinomycetia;o__Propionibacteriales;f__Propionibacteriaceae;g__Arachnia;s__Unclassified	POORLY CHARACTERIZED	S	Function unknown	93
MAG1102	d__Bacteria;p__Actinomycetota;c__Actinomycetia;o__Actinomycetales;f__Dermatophilaceae;g__F2B08;s__Unclassified	CELLULAR PROCESSES AND SIGNALING	D	Cell cycle control, cell division, chromosome partitioning	40
MAG1102	d__Bacteria;p__Actinomycetota;c__Actinomycetia;o__Actinomycetales;f__Dermatophilaceae;g__F2B08;s__Unclassified	CELLULAR PROCESSES AND SIGNALING	M	Cell wall/membrane/envelope biogenesis	165
MAG1102	d__Bacteria;p__Actinomycetota;c__Actinomycetia;o__Actinomycetales;f__Dermatophilaceae;g__F2B08;s__Unclassified	CELLULAR PROCESSES AND SIGNALING	N	Cell motility	11
MAG1102	d__Bacteria;p__Actinomycetota;c__Actinomycetia;o__Actinomycetales;f__Dermatophilaceae;g__F2B08;s__Unclassified	CELLULAR PROCESSES AND SIGNALING	O	Posttranslational modification, protein turnover, chaperones	149
MAG1102	d__Bacteria;p__Actinomycetota;c__Actinomycetia;o__Actinomycetales;f__Dermatophilaceae;g__F2B08;s__Unclassified	CELLULAR PROCESSES AND SIGNALING	T	Signal transduction mechanisms	181
MAG1102	d__Bacteria;p__Actinomycetota;c__Actinomycetia;o__Actinomycetales;f__Dermatophilaceae;g__F2B08;s__Unclassified	CELLULAR PROCESSES AND SIGNALING	U	Intracellular trafficking, secretion, and vesicular transport	32
MAG1102	d__Bacteria;p__Actinomycetota;c__Actinomycetia;o__Actinomycetales;f__Dermatophilaceae;g__F2B08;s__Unclassified	CELLULAR PROCESSES AND SIGNALING	V	Defense mechanisms	96
MAG1102	d__Bacteria;p__Actinomycetota;c__Actinomycetia;o__Actinomycetales;f__Dermatophilaceae;g__F2B08;s__Unclassified	CELLULAR PROCESSES AND SIGNALING	W	Extracellular structures	8
MAG1102	d__Bacteria;p__Actinomycetota;c__Actinomycetia;o__Actinomycetales;f__Dermatophilaceae;g__F2B08;s__Unclassified	CELLULAR PROCESSES AND SIGNALING	X	Mobilome: prophages, transposons	16
MAG1102	d__Bacteria;p__Actinomycetota;c__Actinomycetia;o__Actinomycetales;f__Dermatophilaceae;g__F2B08;s__Unclassified	INFORMATION STORAGE AND PROCESSING	A	RNA processing and modification	1
MAG1102	d__Bacteria;p__Actinomycetota;c__Actinomycetia;o__Actinomycetales;f__Dermatophilaceae;g__F2B08;s__Unclassified	INFORMATION STORAGE AND PROCESSING	J	Translation, ribosomal structure and biogenesis	210
MAG1102	d__Bacteria;p__Actinomycetota;c__Actinomycetia;o__Actinomycetales;f__Dermatophilaceae;g__F2B08;s__Unclassified	INFORMATION STORAGE AND PROCESSING	K	Transcription	204
MAG1102	d__Bacteria;p__Actinomycetota;c__Actinomycetia;o__Actinomycetales;f__Dermatophilaceae;g__F2B08;s__Unclassified	INFORMATION STORAGE AND PROCESSING	L	Replication, recombination and repair	132
MAG1102	d__Bacteria;p__Actinomycetota;c__Actinomycetia;o__Actinomycetales;f__Dermatophilaceae;g__F2B08;s__Unclassified	METABOLISM	C	Energy production and conversion	199
MAG1102	d__Bacteria;p__Actinomycetota;c__Actinomycetia;o__Actinomycetales;f__Dermatophilaceae;g__F2B08;s__Unclassified	METABOLISM	E	Amino acid transport and metabolism	274
MAG1102	d__Bacteria;p__Actinomycetota;c__Actinomycetia;o__Actinomycetales;f__Dermatophilaceae;g__F2B08;s__Unclassified	METABOLISM	F	Nucleotide transport and metabolism	108
MAG1102	d__Bacteria;p__Actinomycetota;c__Actinomycetia;o__Actinomycetales;f__Dermatophilaceae;g__F2B08;s__Unclassified	METABOLISM	G	Carbohydrate transport and metabolism	213
MAG1102	d__Bacteria;p__Actinomycetota;c__Actinomycetia;o__Actinomycetales;f__Dermatophilaceae;g__F2B08;s__Unclassified	METABOLISM	H	Coenzyme transport and metabolism	199
MAG1102	d__Bacteria;p__Actinomycetota;c__Actinomycetia;o__Actinomycetales;f__Dermatophilaceae;g__F2B08;s__Unclassified	METABOLISM	I	Lipid transport and metabolism	169
MAG1102	d__Bacteria;p__Actinomycetota;c__Actinomycetia;o__Actinomycetales;f__Dermatophilaceae;g__F2B08;s__Unclassified	METABOLISM	P	Inorganic ion transport and metabolism	143
MAG1102	d__Bacteria;p__Actinomycetota;c__Actinomycetia;o__Actinomycetales;f__Dermatophilaceae;g__F2B08;s__Unclassified	METABOLISM	Q	Secondary metabolites biosynthesis, transport and catabolism	68
MAG1102	d__Bacteria;p__Actinomycetota;c__Actinomycetia;o__Actinomycetales;f__Dermatophilaceae;g__F2B08;s__Unclassified	POORLY CHARACTERIZED	R	General function prediction only	303
MAG1102	d__Bacteria;p__Actinomycetota;c__Actinomycetia;o__Actinomycetales;f__Dermatophilaceae;g__F2B08;s__Unclassified	POORLY CHARACTERIZED	S	Function unknown	109
MAG1103	d__Bacteria;p__Actinomycetota;c__Rubrobacteria;o__Rubrobacterales;f__Rubrobacteraceae;g__Rubrobacter_D;s__Unclassified	CELLULAR PROCESSES AND SIGNALING	D	Cell cycle control, cell division, chromosome partitioning	43
MAG1103	d__Bacteria;p__Actinomycetota;c__Rubrobacteria;o__Rubrobacterales;f__Rubrobacteraceae;g__Rubrobacter_D;s__Unclassified	CELLULAR PROCESSES AND SIGNALING	M	Cell wall/membrane/envelope biogenesis	154
MAG1103	d__Bacteria;p__Actinomycetota;c__Rubrobacteria;o__Rubrobacterales;f__Rubrobacteraceae;g__Rubrobacter_D;s__Unclassified	CELLULAR PROCESSES AND SIGNALING	N	Cell motility	19
MAG1103	d__Bacteria;p__Actinomycetota;c__Rubrobacteria;o__Rubrobacterales;f__Rubrobacteraceae;g__Rubrobacter_D;s__Unclassified	CELLULAR PROCESSES AND SIGNALING	O	Posttranslational modification, protein turnover, chaperones	123
MAG1103	d__Bacteria;p__Actinomycetota;c__Rubrobacteria;o__Rubrobacterales;f__Rubrobacteraceae;g__Rubrobacter_D;s__Unclassified	CELLULAR PROCESSES AND SIGNALING	T	Signal transduction mechanisms	186
MAG1103	d__Bacteria;p__Actinomycetota;c__Rubrobacteria;o__Rubrobacterales;f__Rubrobacteraceae;g__Rubrobacter_D;s__Unclassified	CELLULAR PROCESSES AND SIGNALING	U	Intracellular trafficking, secretion, and vesicular transport	24
MAG1103	d__Bacteria;p__Actinomycetota;c__Rubrobacteria;o__Rubrobacterales;f__Rubrobacteraceae;g__Rubrobacter_D;s__Unclassified	CELLULAR PROCESSES AND SIGNALING	V	Defense mechanisms	63
MAG1103	d__Bacteria;p__Actinomycetota;c__Rubrobacteria;o__Rubrobacterales;f__Rubrobacteraceae;g__Rubrobacter_D;s__Unclassified	CELLULAR PROCESSES AND SIGNALING	W	Extracellular structures	13
MAG1103	d__Bacteria;p__Actinomycetota;c__Rubrobacteria;o__Rubrobacterales;f__Rubrobacteraceae;g__Rubrobacter_D;s__Unclassified	CELLULAR PROCESSES AND SIGNALING	X	Mobilome: prophages, transposons	6
MAG1103	d__Bacteria;p__Actinomycetota;c__Rubrobacteria;o__Rubrobacterales;f__Rubrobacteraceae;g__Rubrobacter_D;s__Unclassified	CELLULAR PROCESSES AND SIGNALING	Z	Cytoskeleton	3
MAG1103	d__Bacteria;p__Actinomycetota;c__Rubrobacteria;o__Rubrobacterales;f__Rubrobacteraceae;g__Rubrobacter_D;s__Unclassified	INFORMATION STORAGE AND PROCESSING	J	Translation, ribosomal structure and biogenesis	156
MAG1103	d__Bacteria;p__Actinomycetota;c__Rubrobacteria;o__Rubrobacterales;f__Rubrobacteraceae;g__Rubrobacter_D;s__Unclassified	INFORMATION STORAGE AND PROCESSING	K	Transcription	141
MAG1103	d__Bacteria;p__Actinomycetota;c__Rubrobacteria;o__Rubrobacterales;f__Rubrobacteraceae;g__Rubrobacter_D;s__Unclassified	INFORMATION STORAGE AND PROCESSING	L	Replication, recombination and repair	78
MAG1103	d__Bacteria;p__Actinomycetota;c__Rubrobacteria;o__Rubrobacterales;f__Rubrobacteraceae;g__Rubrobacter_D;s__Unclassified	METABOLISM	C	Energy production and conversion	192
MAG1103	d__Bacteria;p__Actinomycetota;c__Rubrobacteria;o__Rubrobacterales;f__Rubrobacteraceae;g__Rubrobacter_D;s__Unclassified	METABOLISM	E	Amino acid transport and metabolism	262
MAG1103	d__Bacteria;p__Actinomycetota;c__Rubrobacteria;o__Rubrobacterales;f__Rubrobacteraceae;g__Rubrobacter_D;s__Unclassified	METABOLISM	F	Nucleotide transport and metabolism	83
MAG1103	d__Bacteria;p__Actinomycetota;c__Rubrobacteria;o__Rubrobacterales;f__Rubrobacteraceae;g__Rubrobacter_D;s__Unclassified	METABOLISM	G	Carbohydrate transport and metabolism	224
MAG1103	d__Bacteria;p__Actinomycetota;c__Rubrobacteria;o__Rubrobacterales;f__Rubrobacteraceae;g__Rubrobacter_D;s__Unclassified	METABOLISM	H	Coenzyme transport and metabolism	189
MAG1103	d__Bacteria;p__Actinomycetota;c__Rubrobacteria;o__Rubrobacterales;f__Rubrobacteraceae;g__Rubrobacter_D;s__Unclassified	METABOLISM	I	Lipid transport and metabolism	145
MAG1103	d__Bacteria;p__Actinomycetota;c__Rubrobacteria;o__Rubrobacterales;f__Rubrobacteraceae;g__Rubrobacter_D;s__Unclassified	METABOLISM	P	Inorganic ion transport and metabolism	156
MAG1103	d__Bacteria;p__Actinomycetota;c__Rubrobacteria;o__Rubrobacterales;f__Rubrobacteraceae;g__Rubrobacter_D;s__Unclassified	METABOLISM	Q	Secondary metabolites biosynthesis, transport and catabolism	49
MAG1103	d__Bacteria;p__Actinomycetota;c__Rubrobacteria;o__Rubrobacterales;f__Rubrobacteraceae;g__Rubrobacter_D;s__Unclassified	POORLY CHARACTERIZED	R	General function prediction only	259
MAG1103	d__Bacteria;p__Actinomycetota;c__Rubrobacteria;o__Rubrobacterales;f__Rubrobacteraceae;g__Rubrobacter_D;s__Unclassified	POORLY CHARACTERIZED	S	Function unknown	89
MAG1109	d__Bacteria;p__Pseudomonadota;c__Alphaproteobacteria;o__Sphingomonadales;f__Sphingomonadaceae;g__Sphingomonas_I;s__Unclassified	CELLULAR PROCESSES AND SIGNALING	D	Cell cycle control, cell division, chromosome partitioning	77
MAG1109	d__Bacteria;p__Pseudomonadota;c__Alphaproteobacteria;o__Sphingomonadales;f__Sphingomonadaceae;g__Sphingomonas_I;s__Unclassified	CELLULAR PROCESSES AND SIGNALING	M	Cell wall/membrane/envelope biogenesis	320
MAG1109	d__Bacteria;p__Pseudomonadota;c__Alphaproteobacteria;o__Sphingomonadales;f__Sphingomonadaceae;g__Sphingomonas_I;s__Unclassified	CELLULAR PROCESSES AND SIGNALING	N	Cell motility	74
MAG1109	d__Bacteria;p__Pseudomonadota;c__Alphaproteobacteria;o__Sphingomonadales;f__Sphingomonadaceae;g__Sphingomonas_I;s__Unclassified	CELLULAR PROCESSES AND SIGNALING	O	Posttranslational modification, protein turnover, chaperones	231
MAG1109	d__Bacteria;p__Pseudomonadota;c__Alphaproteobacteria;o__Sphingomonadales;f__Sphingomonadaceae;g__Sphingomonas_I;s__Unclassified	CELLULAR PROCESSES AND SIGNALING	T	Signal transduction mechanisms	288
MAG1109	d__Bacteria;p__Pseudomonadota;c__Alphaproteobacteria;o__Sphingomonadales;f__Sphingomonadaceae;g__Sphingomonas_I;s__Unclassified	CELLULAR PROCESSES AND SIGNALING	U	Intracellular trafficking, secretion, and vesicular transport	75
MAG1109	d__Bacteria;p__Pseudomonadota;c__Alphaproteobacteria;o__Sphingomonadales;f__Sphingomonadaceae;g__Sphingomonas_I;s__Unclassified	CELLULAR PROCESSES AND SIGNALING	V	Defense mechanisms	141
MAG1109	d__Bacteria;p__Pseudomonadota;c__Alphaproteobacteria;o__Sphingomonadales;f__Sphingomonadaceae;g__Sphingomonas_I;s__Unclassified	CELLULAR PROCESSES AND SIGNALING	W	Extracellular structures	34
MAG1109	d__Bacteria;p__Pseudomonadota;c__Alphaproteobacteria;o__Sphingomonadales;f__Sphingomonadaceae;g__Sphingomonas_I;s__Unclassified	CELLULAR PROCESSES AND SIGNALING	X	Mobilome: prophages, transposons	68
MAG1109	d__Bacteria;p__Pseudomonadota;c__Alphaproteobacteria;o__Sphingomonadales;f__Sphingomonadaceae;g__Sphingomonas_I;s__Unclassified	CELLULAR PROCESSES AND SIGNALING	Z	Cytoskeleton	2
MAG1109	d__Bacteria;p__Pseudomonadota;c__Alphaproteobacteria;o__Sphingomonadales;f__Sphingomonadaceae;g__Sphingomonas_I;s__Unclassified	INFORMATION STORAGE AND PROCESSING	J	Translation, ribosomal structure and biogenesis	289
MAG1109	d__Bacteria;p__Pseudomonadota;c__Alphaproteobacteria;o__Sphingomonadales;f__Sphingomonadaceae;g__Sphingomonas_I;s__Unclassified	INFORMATION STORAGE AND PROCESSING	K	Transcription	288
MAG1109	d__Bacteria;p__Pseudomonadota;c__Alphaproteobacteria;o__Sphingomonadales;f__Sphingomonadaceae;g__Sphingomonas_I;s__Unclassified	INFORMATION STORAGE AND PROCESSING	L	Replication, recombination and repair	178
MAG1109	d__Bacteria;p__Pseudomonadota;c__Alphaproteobacteria;o__Sphingomonadales;f__Sphingomonadaceae;g__Sphingomonas_I;s__Unclassified	METABOLISM	C	Energy production and conversion	349
MAG1109	d__Bacteria;p__Pseudomonadota;c__Alphaproteobacteria;o__Sphingomonadales;f__Sphingomonadaceae;g__Sphingomonas_I;s__Unclassified	METABOLISM	E	Amino acid transport and metabolism	360
MAG1109	d__Bacteria;p__Pseudomonadota;c__Alphaproteobacteria;o__Sphingomonadales;f__Sphingomonadaceae;g__Sphingomonas_I;s__Unclassified	METABOLISM	F	Nucleotide transport and metabolism	105
MAG1109	d__Bacteria;p__Pseudomonadota;c__Alphaproteobacteria;o__Sphingomonadales;f__Sphingomonadaceae;g__Sphingomonas_I;s__Unclassified	METABOLISM	G	Carbohydrate transport and metabolism	321
MAG1109	d__Bacteria;p__Pseudomonadota;c__Alphaproteobacteria;o__Sphingomonadales;f__Sphingomonadaceae;g__Sphingomonas_I;s__Unclassified	METABOLISM	H	Coenzyme transport and metabolism	270
MAG1109	d__Bacteria;p__Pseudomonadota;c__Alphaproteobacteria;o__Sphingomonadales;f__Sphingomonadaceae;g__Sphingomonas_I;s__Unclassified	METABOLISM	I	Lipid transport and metabolism	417
MAG1109	d__Bacteria;p__Pseudomonadota;c__Alphaproteobacteria;o__Sphingomonadales;f__Sphingomonadaceae;g__Sphingomonas_I;s__Unclassified	METABOLISM	P	Inorganic ion transport and metabolism	305
MAG1109	d__Bacteria;p__Pseudomonadota;c__Alphaproteobacteria;o__Sphingomonadales;f__Sphingomonadaceae;g__Sphingomonas_I;s__Unclassified	METABOLISM	Q	Secondary metabolites biosynthesis, transport and catabolism	126
MAG1109	d__Bacteria;p__Pseudomonadota;c__Alphaproteobacteria;o__Sphingomonadales;f__Sphingomonadaceae;g__Sphingomonas_I;s__Unclassified	POORLY CHARACTERIZED	R	General function prediction only	435
MAG1109	d__Bacteria;p__Pseudomonadota;c__Alphaproteobacteria;o__Sphingomonadales;f__Sphingomonadaceae;g__Sphingomonas_I;s__Unclassified	POORLY CHARACTERIZED	S	Function unknown	204
MAG1111	d__Bacteria;p__Pseudomonadota;c__Alphaproteobacteria;o__Sphingomonadales;f__Sphingomonadaceae;g__Sphingomonas_O;s__Unclassified	CELLULAR PROCESSES AND SIGNALING	D	Cell cycle control, cell division, chromosome partitioning	38
MAG1111	d__Bacteria;p__Pseudomonadota;c__Alphaproteobacteria;o__Sphingomonadales;f__Sphingomonadaceae;g__Sphingomonas_O;s__Unclassified	CELLULAR PROCESSES AND SIGNALING	M	Cell wall/membrane/envelope biogenesis	156
MAG1111	d__Bacteria;p__Pseudomonadota;c__Alphaproteobacteria;o__Sphingomonadales;f__Sphingomonadaceae;g__Sphingomonas_O;s__Unclassified	CELLULAR PROCESSES AND SIGNALING	N	Cell motility	43
MAG1111	d__Bacteria;p__Pseudomonadota;c__Alphaproteobacteria;o__Sphingomonadales;f__Sphingomonadaceae;g__Sphingomonas_O;s__Unclassified	CELLULAR PROCESSES AND SIGNALING	O	Posttranslational modification, protein turnover, chaperones	132
MAG1111	d__Bacteria;p__Pseudomonadota;c__Alphaproteobacteria;o__Sphingomonadales;f__Sphingomonadaceae;g__Sphingomonas_O;s__Unclassified	CELLULAR PROCESSES AND SIGNALING	T	Signal transduction mechanisms	105
MAG1111	d__Bacteria;p__Pseudomonadota;c__Alphaproteobacteria;o__Sphingomonadales;f__Sphingomonadaceae;g__Sphingomonas_O;s__Unclassified	CELLULAR PROCESSES AND SIGNALING	U	Intracellular trafficking, secretion, and vesicular transport	70
MAG1111	d__Bacteria;p__Pseudomonadota;c__Alphaproteobacteria;o__Sphingomonadales;f__Sphingomonadaceae;g__Sphingomonas_O;s__Unclassified	CELLULAR PROCESSES AND SIGNALING	V	Defense mechanisms	41
MAG1111	d__Bacteria;p__Pseudomonadota;c__Alphaproteobacteria;o__Sphingomonadales;f__Sphingomonadaceae;g__Sphingomonas_O;s__Unclassified	CELLULAR PROCESSES AND SIGNALING	W	Extracellular structures	24
MAG1111	d__Bacteria;p__Pseudomonadota;c__Alphaproteobacteria;o__Sphingomonadales;f__Sphingomonadaceae;g__Sphingomonas_O;s__Unclassified	CELLULAR PROCESSES AND SIGNALING	X	Mobilome: prophages, transposons	8
MAG1111	d__Bacteria;p__Pseudomonadota;c__Alphaproteobacteria;o__Sphingomonadales;f__Sphingomonadaceae;g__Sphingomonas_O;s__Unclassified	CELLULAR PROCESSES AND SIGNALING	Z	Cytoskeleton	3
MAG1111	d__Bacteria;p__Pseudomonadota;c__Alphaproteobacteria;o__Sphingomonadales;f__Sphingomonadaceae;g__Sphingomonas_O;s__Unclassified	INFORMATION STORAGE AND PROCESSING	B	Chromatin structure and dynamics	1
MAG1111	d__Bacteria;p__Pseudomonadota;c__Alphaproteobacteria;o__Sphingomonadales;f__Sphingomonadaceae;g__Sphingomonas_O;s__Unclassified	INFORMATION STORAGE AND PROCESSING	J	Translation, ribosomal structure and biogenesis	183
MAG1111	d__Bacteria;p__Pseudomonadota;c__Alphaproteobacteria;o__Sphingomonadales;f__Sphingomonadaceae;g__Sphingomonas_O;s__Unclassified	INFORMATION STORAGE AND PROCESSING	K	Transcription	72
MAG1111	d__Bacteria;p__Pseudomonadota;c__Alphaproteobacteria;o__Sphingomonadales;f__Sphingomonadaceae;g__Sphingomonas_O;s__Unclassified	INFORMATION STORAGE AND PROCESSING	L	Replication, recombination and repair	114
MAG1111	d__Bacteria;p__Pseudomonadota;c__Alphaproteobacteria;o__Sphingomonadales;f__Sphingomonadaceae;g__Sphingomonas_O;s__Unclassified	METABOLISM	C	Energy production and conversion	100
MAG1111	d__Bacteria;p__Pseudomonadota;c__Alphaproteobacteria;o__Sphingomonadales;f__Sphingomonadaceae;g__Sphingomonas_O;s__Unclassified	METABOLISM	E	Amino acid transport and metabolism	142
MAG1111	d__Bacteria;p__Pseudomonadota;c__Alphaproteobacteria;o__Sphingomonadales;f__Sphingomonadaceae;g__Sphingomonas_O;s__Unclassified	METABOLISM	F	Nucleotide transport and metabolism	50
MAG1111	d__Bacteria;p__Pseudomonadota;c__Alphaproteobacteria;o__Sphingomonadales;f__Sphingomonadaceae;g__Sphingomonas_O;s__Unclassified	METABOLISM	G	Carbohydrate transport and metabolism	89
MAG1111	d__Bacteria;p__Pseudomonadota;c__Alphaproteobacteria;o__Sphingomonadales;f__Sphingomonadaceae;g__Sphingomonas_O;s__Unclassified	METABOLISM	H	Coenzyme transport and metabolism	118
MAG1111	d__Bacteria;p__Pseudomonadota;c__Alphaproteobacteria;o__Sphingomonadales;f__Sphingomonadaceae;g__Sphingomonas_O;s__Unclassified	METABOLISM	I	Lipid transport and metabolism	122
MAG1111	d__Bacteria;p__Pseudomonadota;c__Alphaproteobacteria;o__Sphingomonadales;f__Sphingomonadaceae;g__Sphingomonas_O;s__Unclassified	METABOLISM	P	Inorganic ion transport and metabolism	85
MAG1111	d__Bacteria;p__Pseudomonadota;c__Alphaproteobacteria;o__Sphingomonadales;f__Sphingomonadaceae;g__Sphingomonas_O;s__Unclassified	METABOLISM	Q	Secondary metabolites biosynthesis, transport and catabolism	38
MAG1111	d__Bacteria;p__Pseudomonadota;c__Alphaproteobacteria;o__Sphingomonadales;f__Sphingomonadaceae;g__Sphingomonas_O;s__Unclassified	POORLY CHARACTERIZED	R	General function prediction only	129
MAG1111	d__Bacteria;p__Pseudomonadota;c__Alphaproteobacteria;o__Sphingomonadales;f__Sphingomonadaceae;g__Sphingomonas_O;s__Unclassified	POORLY CHARACTERIZED	S	Function unknown	91
MAG1114	d__Bacteria;p__Pseudomonadota;c__Alphaproteobacteria;o__Rhizobiales;f__Xanthobacteraceae;g__Bradyrhizobium;s__Unclassified	CELLULAR PROCESSES AND SIGNALING	D	Cell cycle control, cell division, chromosome partitioning	44
MAG1114	d__Bacteria;p__Pseudomonadota;c__Alphaproteobacteria;o__Rhizobiales;f__Xanthobacteraceae;g__Bradyrhizobium;s__Unclassified	CELLULAR PROCESSES AND SIGNALING	M	Cell wall/membrane/envelope biogenesis	256
MAG1114	d__Bacteria;p__Pseudomonadota;c__Alphaproteobacteria;o__Rhizobiales;f__Xanthobacteraceae;g__Bradyrhizobium;s__Unclassified	CELLULAR PROCESSES AND SIGNALING	N	Cell motility	61
MAG1114	d__Bacteria;p__Pseudomonadota;c__Alphaproteobacteria;o__Rhizobiales;f__Xanthobacteraceae;g__Bradyrhizobium;s__Unclassified	CELLULAR PROCESSES AND SIGNALING	O	Posttranslational modification, protein turnover, chaperones	192
MAG1114	d__Bacteria;p__Pseudomonadota;c__Alphaproteobacteria;o__Rhizobiales;f__Xanthobacteraceae;g__Bradyrhizobium;s__Unclassified	CELLULAR PROCESSES AND SIGNALING	T	Signal transduction mechanisms	236
MAG1114	d__Bacteria;p__Pseudomonadota;c__Alphaproteobacteria;o__Rhizobiales;f__Xanthobacteraceae;g__Bradyrhizobium;s__Unclassified	CELLULAR PROCESSES AND SIGNALING	U	Intracellular trafficking, secretion, and vesicular transport	63
MAG1114	d__Bacteria;p__Pseudomonadota;c__Alphaproteobacteria;o__Rhizobiales;f__Xanthobacteraceae;g__Bradyrhizobium;s__Unclassified	CELLULAR PROCESSES AND SIGNALING	V	Defense mechanisms	99
MAG1114	d__Bacteria;p__Pseudomonadota;c__Alphaproteobacteria;o__Rhizobiales;f__Xanthobacteraceae;g__Bradyrhizobium;s__Unclassified	CELLULAR PROCESSES AND SIGNALING	W	Extracellular structures	28
MAG1114	d__Bacteria;p__Pseudomonadota;c__Alphaproteobacteria;o__Rhizobiales;f__Xanthobacteraceae;g__Bradyrhizobium;s__Unclassified	CELLULAR PROCESSES AND SIGNALING	X	Mobilome: prophages, transposons	29
MAG1114	d__Bacteria;p__Pseudomonadota;c__Alphaproteobacteria;o__Rhizobiales;f__Xanthobacteraceae;g__Bradyrhizobium;s__Unclassified	INFORMATION STORAGE AND PROCESSING	J	Translation, ribosomal structure and biogenesis	205
MAG1114	d__Bacteria;p__Pseudomonadota;c__Alphaproteobacteria;o__Rhizobiales;f__Xanthobacteraceae;g__Bradyrhizobium;s__Unclassified	INFORMATION STORAGE AND PROCESSING	K	Transcription	172
MAG1114	d__Bacteria;p__Pseudomonadota;c__Alphaproteobacteria;o__Rhizobiales;f__Xanthobacteraceae;g__Bradyrhizobium;s__Unclassified	INFORMATION STORAGE AND PROCESSING	L	Replication, recombination and repair	102
MAG1114	d__Bacteria;p__Pseudomonadota;c__Alphaproteobacteria;o__Rhizobiales;f__Xanthobacteraceae;g__Bradyrhizobium;s__Unclassified	METABOLISM	C	Energy production and conversion	290
MAG1114	d__Bacteria;p__Pseudomonadota;c__Alphaproteobacteria;o__Rhizobiales;f__Xanthobacteraceae;g__Bradyrhizobium;s__Unclassified	METABOLISM	E	Amino acid transport and metabolism	460
MAG1114	d__Bacteria;p__Pseudomonadota;c__Alphaproteobacteria;o__Rhizobiales;f__Xanthobacteraceae;g__Bradyrhizobium;s__Unclassified	METABOLISM	F	Nucleotide transport and metabolism	77
MAG1114	d__Bacteria;p__Pseudomonadota;c__Alphaproteobacteria;o__Rhizobiales;f__Xanthobacteraceae;g__Bradyrhizobium;s__Unclassified	METABOLISM	G	Carbohydrate transport and metabolism	254
MAG1114	d__Bacteria;p__Pseudomonadota;c__Alphaproteobacteria;o__Rhizobiales;f__Xanthobacteraceae;g__Bradyrhizobium;s__Unclassified	METABOLISM	H	Coenzyme transport and metabolism	223
MAG1114	d__Bacteria;p__Pseudomonadota;c__Alphaproteobacteria;o__Rhizobiales;f__Xanthobacteraceae;g__Bradyrhizobium;s__Unclassified	METABOLISM	I	Lipid transport and metabolism	322
MAG1114	d__Bacteria;p__Pseudomonadota;c__Alphaproteobacteria;o__Rhizobiales;f__Xanthobacteraceae;g__Bradyrhizobium;s__Unclassified	METABOLISM	P	Inorganic ion transport and metabolism	213
MAG1114	d__Bacteria;p__Pseudomonadota;c__Alphaproteobacteria;o__Rhizobiales;f__Xanthobacteraceae;g__Bradyrhizobium;s__Unclassified	METABOLISM	Q	Secondary metabolites biosynthesis, transport and catabolism	114
MAG1114	d__Bacteria;p__Pseudomonadota;c__Alphaproteobacteria;o__Rhizobiales;f__Xanthobacteraceae;g__Bradyrhizobium;s__Unclassified	POORLY CHARACTERIZED	R	General function prediction only	308
MAG1114	d__Bacteria;p__Pseudomonadota;c__Alphaproteobacteria;o__Rhizobiales;f__Xanthobacteraceae;g__Bradyrhizobium;s__Unclassified	POORLY CHARACTERIZED	S	Function unknown	186
MAG1122	d__Bacteria;p__Bacteroidota;c__Bacteroidia;o__Flavobacteriales;f__PHOS-HE28;g__PHOS-HE28;s__Unclassified	CELLULAR PROCESSES AND SIGNALING	D	Cell cycle control, cell division, chromosome partitioning	50
MAG1122	d__Bacteria;p__Bacteroidota;c__Bacteroidia;o__Flavobacteriales;f__PHOS-HE28;g__PHOS-HE28;s__Unclassified	CELLULAR PROCESSES AND SIGNALING	M	Cell wall/membrane/envelope biogenesis	256
MAG1122	d__Bacteria;p__Bacteroidota;c__Bacteroidia;o__Flavobacteriales;f__PHOS-HE28;g__PHOS-HE28;s__Unclassified	CELLULAR PROCESSES AND SIGNALING	N	Cell motility	19
MAG1122	d__Bacteria;p__Bacteroidota;c__Bacteroidia;o__Flavobacteriales;f__PHOS-HE28;g__PHOS-HE28;s__Unclassified	CELLULAR PROCESSES AND SIGNALING	O	Posttranslational modification, protein turnover, chaperones	112
MAG1122	d__Bacteria;p__Bacteroidota;c__Bacteroidia;o__Flavobacteriales;f__PHOS-HE28;g__PHOS-HE28;s__Unclassified	CELLULAR PROCESSES AND SIGNALING	T	Signal transduction mechanisms	114
MAG1122	d__Bacteria;p__Bacteroidota;c__Bacteroidia;o__Flavobacteriales;f__PHOS-HE28;g__PHOS-HE28;s__Unclassified	CELLULAR PROCESSES AND SIGNALING	U	Intracellular trafficking, secretion, and vesicular transport	31
MAG1122	d__Bacteria;p__Bacteroidota;c__Bacteroidia;o__Flavobacteriales;f__PHOS-HE28;g__PHOS-HE28;s__Unclassified	CELLULAR PROCESSES AND SIGNALING	V	Defense mechanisms	63
MAG1122	d__Bacteria;p__Bacteroidota;c__Bacteroidia;o__Flavobacteriales;f__PHOS-HE28;g__PHOS-HE28;s__Unclassified	CELLULAR PROCESSES AND SIGNALING	W	Extracellular structures	5
MAG1122	d__Bacteria;p__Bacteroidota;c__Bacteroidia;o__Flavobacteriales;f__PHOS-HE28;g__PHOS-HE28;s__Unclassified	CELLULAR PROCESSES AND SIGNALING	X	Mobilome: prophages, transposons	6
MAG1122	d__Bacteria;p__Bacteroidota;c__Bacteroidia;o__Flavobacteriales;f__PHOS-HE28;g__PHOS-HE28;s__Unclassified	CELLULAR PROCESSES AND SIGNALING	Z	Cytoskeleton	9
MAG1122	d__Bacteria;p__Bacteroidota;c__Bacteroidia;o__Flavobacteriales;f__PHOS-HE28;g__PHOS-HE28;s__Unclassified	INFORMATION STORAGE AND PROCESSING	J	Translation, ribosomal structure and biogenesis	167
MAG1122	d__Bacteria;p__Bacteroidota;c__Bacteroidia;o__Flavobacteriales;f__PHOS-HE28;g__PHOS-HE28;s__Unclassified	INFORMATION STORAGE AND PROCESSING	K	Transcription	91
MAG1122	d__Bacteria;p__Bacteroidota;c__Bacteroidia;o__Flavobacteriales;f__PHOS-HE28;g__PHOS-HE28;s__Unclassified	INFORMATION STORAGE AND PROCESSING	L	Replication, recombination and repair	102
MAG1122	d__Bacteria;p__Bacteroidota;c__Bacteroidia;o__Flavobacteriales;f__PHOS-HE28;g__PHOS-HE28;s__Unclassified	METABOLISM	C	Energy production and conversion	106
MAG1122	d__Bacteria;p__Bacteroidota;c__Bacteroidia;o__Flavobacteriales;f__PHOS-HE28;g__PHOS-HE28;s__Unclassified	METABOLISM	E	Amino acid transport and metabolism	104
MAG1122	d__Bacteria;p__Bacteroidota;c__Bacteroidia;o__Flavobacteriales;f__PHOS-HE28;g__PHOS-HE28;s__Unclassified	METABOLISM	F	Nucleotide transport and metabolism	53
MAG1122	d__Bacteria;p__Bacteroidota;c__Bacteroidia;o__Flavobacteriales;f__PHOS-HE28;g__PHOS-HE28;s__Unclassified	METABOLISM	G	Carbohydrate transport and metabolism	66
MAG1122	d__Bacteria;p__Bacteroidota;c__Bacteroidia;o__Flavobacteriales;f__PHOS-HE28;g__PHOS-HE28;s__Unclassified	METABOLISM	H	Coenzyme transport and metabolism	108
MAG1122	d__Bacteria;p__Bacteroidota;c__Bacteroidia;o__Flavobacteriales;f__PHOS-HE28;g__PHOS-HE28;s__Unclassified	METABOLISM	I	Lipid transport and metabolism	95
MAG1122	d__Bacteria;p__Bacteroidota;c__Bacteroidia;o__Flavobacteriales;f__PHOS-HE28;g__PHOS-HE28;s__Unclassified	METABOLISM	P	Inorganic ion transport and metabolism	93
MAG1122	d__Bacteria;p__Bacteroidota;c__Bacteroidia;o__Flavobacteriales;f__PHOS-HE28;g__PHOS-HE28;s__Unclassified	METABOLISM	Q	Secondary metabolites biosynthesis, transport and catabolism	24
MAG1122	d__Bacteria;p__Bacteroidota;c__Bacteroidia;o__Flavobacteriales;f__PHOS-HE28;g__PHOS-HE28;s__Unclassified	POORLY CHARACTERIZED	R	General function prediction only	143
MAG1122	d__Bacteria;p__Bacteroidota;c__Bacteroidia;o__Flavobacteriales;f__PHOS-HE28;g__PHOS-HE28;s__Unclassified	POORLY CHARACTERIZED	S	Function unknown	133
MAG1123	d__Bacteria;p__Actinomycetota;c__Thermoleophilia;o__Gaiellales;f__Gaiellaceae;g__VAXT01;s__Unclassified	CELLULAR PROCESSES AND SIGNALING	D	Cell cycle control, cell division, chromosome partitioning	25
MAG1123	d__Bacteria;p__Actinomycetota;c__Thermoleophilia;o__Gaiellales;f__Gaiellaceae;g__VAXT01;s__Unclassified	CELLULAR PROCESSES AND SIGNALING	M	Cell wall/membrane/envelope biogenesis	111
MAG1123	d__Bacteria;p__Actinomycetota;c__Thermoleophilia;o__Gaiellales;f__Gaiellaceae;g__VAXT01;s__Unclassified	CELLULAR PROCESSES AND SIGNALING	N	Cell motility	7
MAG1123	d__Bacteria;p__Actinomycetota;c__Thermoleophilia;o__Gaiellales;f__Gaiellaceae;g__VAXT01;s__Unclassified	CELLULAR PROCESSES AND SIGNALING	O	Posttranslational modification, protein turnover, chaperones	104
MAG1123	d__Bacteria;p__Actinomycetota;c__Thermoleophilia;o__Gaiellales;f__Gaiellaceae;g__VAXT01;s__Unclassified	CELLULAR PROCESSES AND SIGNALING	T	Signal transduction mechanisms	107
MAG1123	d__Bacteria;p__Actinomycetota;c__Thermoleophilia;o__Gaiellales;f__Gaiellaceae;g__VAXT01;s__Unclassified	CELLULAR PROCESSES AND SIGNALING	U	Intracellular trafficking, secretion, and vesicular transport	20
MAG1123	d__Bacteria;p__Actinomycetota;c__Thermoleophilia;o__Gaiellales;f__Gaiellaceae;g__VAXT01;s__Unclassified	CELLULAR PROCESSES AND SIGNALING	V	Defense mechanisms	33
MAG1123	d__Bacteria;p__Actinomycetota;c__Thermoleophilia;o__Gaiellales;f__Gaiellaceae;g__VAXT01;s__Unclassified	CELLULAR PROCESSES AND SIGNALING	W	Extracellular structures	5
MAG1123	d__Bacteria;p__Actinomycetota;c__Thermoleophilia;o__Gaiellales;f__Gaiellaceae;g__VAXT01;s__Unclassified	CELLULAR PROCESSES AND SIGNALING	X	Mobilome: prophages, transposons	5
MAG1123	d__Bacteria;p__Actinomycetota;c__Thermoleophilia;o__Gaiellales;f__Gaiellaceae;g__VAXT01;s__Unclassified	CELLULAR PROCESSES AND SIGNALING	Z	Cytoskeleton	1
MAG1123	d__Bacteria;p__Actinomycetota;c__Thermoleophilia;o__Gaiellales;f__Gaiellaceae;g__VAXT01;s__Unclassified	INFORMATION STORAGE AND PROCESSING	J	Translation, ribosomal structure and biogenesis	170
MAG1123	d__Bacteria;p__Actinomycetota;c__Thermoleophilia;o__Gaiellales;f__Gaiellaceae;g__VAXT01;s__Unclassified	INFORMATION STORAGE AND PROCESSING	K	Transcription	97
MAG1123	d__Bacteria;p__Actinomycetota;c__Thermoleophilia;o__Gaiellales;f__Gaiellaceae;g__VAXT01;s__Unclassified	INFORMATION STORAGE AND PROCESSING	L	Replication, recombination and repair	79
MAG1123	d__Bacteria;p__Actinomycetota;c__Thermoleophilia;o__Gaiellales;f__Gaiellaceae;g__VAXT01;s__Unclassified	METABOLISM	C	Energy production and conversion	107
MAG1123	d__Bacteria;p__Actinomycetota;c__Thermoleophilia;o__Gaiellales;f__Gaiellaceae;g__VAXT01;s__Unclassified	METABOLISM	E	Amino acid transport and metabolism	141
MAG1123	d__Bacteria;p__Actinomycetota;c__Thermoleophilia;o__Gaiellales;f__Gaiellaceae;g__VAXT01;s__Unclassified	METABOLISM	F	Nucleotide transport and metabolism	59
MAG1123	d__Bacteria;p__Actinomycetota;c__Thermoleophilia;o__Gaiellales;f__Gaiellaceae;g__VAXT01;s__Unclassified	METABOLISM	G	Carbohydrate transport and metabolism	92
MAG1123	d__Bacteria;p__Actinomycetota;c__Thermoleophilia;o__Gaiellales;f__Gaiellaceae;g__VAXT01;s__Unclassified	METABOLISM	H	Coenzyme transport and metabolism	94
MAG1123	d__Bacteria;p__Actinomycetota;c__Thermoleophilia;o__Gaiellales;f__Gaiellaceae;g__VAXT01;s__Unclassified	METABOLISM	I	Lipid transport and metabolism	72
MAG1123	d__Bacteria;p__Actinomycetota;c__Thermoleophilia;o__Gaiellales;f__Gaiellaceae;g__VAXT01;s__Unclassified	METABOLISM	P	Inorganic ion transport and metabolism	64
MAG1123	d__Bacteria;p__Actinomycetota;c__Thermoleophilia;o__Gaiellales;f__Gaiellaceae;g__VAXT01;s__Unclassified	METABOLISM	Q	Secondary metabolites biosynthesis, transport and catabolism	18
MAG1123	d__Bacteria;p__Actinomycetota;c__Thermoleophilia;o__Gaiellales;f__Gaiellaceae;g__VAXT01;s__Unclassified	POORLY CHARACTERIZED	R	General function prediction only	115
MAG1123	d__Bacteria;p__Actinomycetota;c__Thermoleophilia;o__Gaiellales;f__Gaiellaceae;g__VAXT01;s__Unclassified	POORLY CHARACTERIZED	S	Function unknown	41
MAG1133	d__Bacteria;p__Actinomycetota;c__Actinomycetia;o__Actinomycetales;f__Microbacteriaceae;g__Microbacterium;s__Unclassified	CELLULAR PROCESSES AND SIGNALING	D	Cell cycle control, cell division, chromosome partitioning	31
MAG1133	d__Bacteria;p__Actinomycetota;c__Actinomycetia;o__Actinomycetales;f__Microbacteriaceae;g__Microbacterium;s__Unclassified	CELLULAR PROCESSES AND SIGNALING	M	Cell wall/membrane/envelope biogenesis	113
MAG1133	d__Bacteria;p__Actinomycetota;c__Actinomycetia;o__Actinomycetales;f__Microbacteriaceae;g__Microbacterium;s__Unclassified	CELLULAR PROCESSES AND SIGNALING	N	Cell motility	31
MAG1133	d__Bacteria;p__Actinomycetota;c__Actinomycetia;o__Actinomycetales;f__Microbacteriaceae;g__Microbacterium;s__Unclassified	CELLULAR PROCESSES AND SIGNALING	O	Posttranslational modification, protein turnover, chaperones	94
MAG1133	d__Bacteria;p__Actinomycetota;c__Actinomycetia;o__Actinomycetales;f__Microbacteriaceae;g__Microbacterium;s__Unclassified	CELLULAR PROCESSES AND SIGNALING	T	Signal transduction mechanisms	85
MAG1133	d__Bacteria;p__Actinomycetota;c__Actinomycetia;o__Actinomycetales;f__Microbacteriaceae;g__Microbacterium;s__Unclassified	CELLULAR PROCESSES AND SIGNALING	U	Intracellular trafficking, secretion, and vesicular transport	24
MAG1133	d__Bacteria;p__Actinomycetota;c__Actinomycetia;o__Actinomycetales;f__Microbacteriaceae;g__Microbacterium;s__Unclassified	CELLULAR PROCESSES AND SIGNALING	V	Defense mechanisms	45
MAG1133	d__Bacteria;p__Actinomycetota;c__Actinomycetia;o__Actinomycetales;f__Microbacteriaceae;g__Microbacterium;s__Unclassified	CELLULAR PROCESSES AND SIGNALING	W	Extracellular structures	7
MAG1133	d__Bacteria;p__Actinomycetota;c__Actinomycetia;o__Actinomycetales;f__Microbacteriaceae;g__Microbacterium;s__Unclassified	CELLULAR PROCESSES AND SIGNALING	X	Mobilome: prophages, transposons	2
MAG1133	d__Bacteria;p__Actinomycetota;c__Actinomycetia;o__Actinomycetales;f__Microbacteriaceae;g__Microbacterium;s__Unclassified	INFORMATION STORAGE AND PROCESSING	A	RNA processing and modification	1
MAG1133	d__Bacteria;p__Actinomycetota;c__Actinomycetia;o__Actinomycetales;f__Microbacteriaceae;g__Microbacterium;s__Unclassified	INFORMATION STORAGE AND PROCESSING	J	Translation, ribosomal structure and biogenesis	124
MAG1133	d__Bacteria;p__Actinomycetota;c__Actinomycetia;o__Actinomycetales;f__Microbacteriaceae;g__Microbacterium;s__Unclassified	INFORMATION STORAGE AND PROCESSING	K	Transcription	159
MAG1133	d__Bacteria;p__Actinomycetota;c__Actinomycetia;o__Actinomycetales;f__Microbacteriaceae;g__Microbacterium;s__Unclassified	INFORMATION STORAGE AND PROCESSING	L	Replication, recombination and repair	105
MAG1133	d__Bacteria;p__Actinomycetota;c__Actinomycetia;o__Actinomycetales;f__Microbacteriaceae;g__Microbacterium;s__Unclassified	METABOLISM	C	Energy production and conversion	75
MAG1133	d__Bacteria;p__Actinomycetota;c__Actinomycetia;o__Actinomycetales;f__Microbacteriaceae;g__Microbacterium;s__Unclassified	METABOLISM	E	Amino acid transport and metabolism	221
MAG1133	d__Bacteria;p__Actinomycetota;c__Actinomycetia;o__Actinomycetales;f__Microbacteriaceae;g__Microbacterium;s__Unclassified	METABOLISM	F	Nucleotide transport and metabolism	70
MAG1133	d__Bacteria;p__Actinomycetota;c__Actinomycetia;o__Actinomycetales;f__Microbacteriaceae;g__Microbacterium;s__Unclassified	METABOLISM	G	Carbohydrate transport and metabolism	195
MAG1133	d__Bacteria;p__Actinomycetota;c__Actinomycetia;o__Actinomycetales;f__Microbacteriaceae;g__Microbacterium;s__Unclassified	METABOLISM	H	Coenzyme transport and metabolism	131
MAG1133	d__Bacteria;p__Actinomycetota;c__Actinomycetia;o__Actinomycetales;f__Microbacteriaceae;g__Microbacterium;s__Unclassified	METABOLISM	I	Lipid transport and metabolism	83
MAG1133	d__Bacteria;p__Actinomycetota;c__Actinomycetia;o__Actinomycetales;f__Microbacteriaceae;g__Microbacterium;s__Unclassified	METABOLISM	P	Inorganic ion transport and metabolism	106
MAG1133	d__Bacteria;p__Actinomycetota;c__Actinomycetia;o__Actinomycetales;f__Microbacteriaceae;g__Microbacterium;s__Unclassified	METABOLISM	Q	Secondary metabolites biosynthesis, transport and catabolism	32
MAG1133	d__Bacteria;p__Actinomycetota;c__Actinomycetia;o__Actinomycetales;f__Microbacteriaceae;g__Microbacterium;s__Unclassified	POORLY CHARACTERIZED	R	General function prediction only	162
MAG1133	d__Bacteria;p__Actinomycetota;c__Actinomycetia;o__Actinomycetales;f__Microbacteriaceae;g__Microbacterium;s__Unclassified	POORLY CHARACTERIZED	S	Function unknown	67
MAG115	d__Bacteria;p__Bacteroidota;c__Kapabacteria;o__OLB7;f__OLB7;g__JAFDZV01;s__Unclassified	CELLULAR PROCESSES AND SIGNALING	D	Cell cycle control, cell division, chromosome partitioning	61
MAG115	d__Bacteria;p__Bacteroidota;c__Kapabacteria;o__OLB7;f__OLB7;g__JAFDZV01;s__Unclassified	CELLULAR PROCESSES AND SIGNALING	M	Cell wall/membrane/envelope biogenesis	333
MAG115	d__Bacteria;p__Bacteroidota;c__Kapabacteria;o__OLB7;f__OLB7;g__JAFDZV01;s__Unclassified	CELLULAR PROCESSES AND SIGNALING	N	Cell motility	25
MAG115	d__Bacteria;p__Bacteroidota;c__Kapabacteria;o__OLB7;f__OLB7;g__JAFDZV01;s__Unclassified	CELLULAR PROCESSES AND SIGNALING	O	Posttranslational modification, protein turnover, chaperones	222
MAG115	d__Bacteria;p__Bacteroidota;c__Kapabacteria;o__OLB7;f__OLB7;g__JAFDZV01;s__Unclassified	CELLULAR PROCESSES AND SIGNALING	T	Signal transduction mechanisms	237
MAG115	d__Bacteria;p__Bacteroidota;c__Kapabacteria;o__OLB7;f__OLB7;g__JAFDZV01;s__Unclassified	CELLULAR PROCESSES AND SIGNALING	U	Intracellular trafficking, secretion, and vesicular transport	56
MAG115	d__Bacteria;p__Bacteroidota;c__Kapabacteria;o__OLB7;f__OLB7;g__JAFDZV01;s__Unclassified	CELLULAR PROCESSES AND SIGNALING	V	Defense mechanisms	95
MAG115	d__Bacteria;p__Bacteroidota;c__Kapabacteria;o__OLB7;f__OLB7;g__JAFDZV01;s__Unclassified	CELLULAR PROCESSES AND SIGNALING	W	Extracellular structures	7
MAG115	d__Bacteria;p__Bacteroidota;c__Kapabacteria;o__OLB7;f__OLB7;g__JAFDZV01;s__Unclassified	CELLULAR PROCESSES AND SIGNALING	X	Mobilome: prophages, transposons	33
MAG115	d__Bacteria;p__Bacteroidota;c__Kapabacteria;o__OLB7;f__OLB7;g__JAFDZV01;s__Unclassified	CELLULAR PROCESSES AND SIGNALING	Z	Cytoskeleton	4
MAG115	d__Bacteria;p__Bacteroidota;c__Kapabacteria;o__OLB7;f__OLB7;g__JAFDZV01;s__Unclassified	INFORMATION STORAGE AND PROCESSING	J	Translation, ribosomal structure and biogenesis	231
MAG115	d__Bacteria;p__Bacteroidota;c__Kapabacteria;o__OLB7;f__OLB7;g__JAFDZV01;s__Unclassified	INFORMATION STORAGE AND PROCESSING	K	Transcription	204
MAG115	d__Bacteria;p__Bacteroidota;c__Kapabacteria;o__OLB7;f__OLB7;g__JAFDZV01;s__Unclassified	INFORMATION STORAGE AND PROCESSING	L	Replication, recombination and repair	145
MAG115	d__Bacteria;p__Bacteroidota;c__Kapabacteria;o__OLB7;f__OLB7;g__JAFDZV01;s__Unclassified	METABOLISM	C	Energy production and conversion	155
MAG115	d__Bacteria;p__Bacteroidota;c__Kapabacteria;o__OLB7;f__OLB7;g__JAFDZV01;s__Unclassified	METABOLISM	E	Amino acid transport and metabolism	178
MAG115	d__Bacteria;p__Bacteroidota;c__Kapabacteria;o__OLB7;f__OLB7;g__JAFDZV01;s__Unclassified	METABOLISM	F	Nucleotide transport and metabolism	76
MAG115	d__Bacteria;p__Bacteroidota;c__Kapabacteria;o__OLB7;f__OLB7;g__JAFDZV01;s__Unclassified	METABOLISM	G	Carbohydrate transport and metabolism	129
MAG115	d__Bacteria;p__Bacteroidota;c__Kapabacteria;o__OLB7;f__OLB7;g__JAFDZV01;s__Unclassified	METABOLISM	H	Coenzyme transport and metabolism	176
MAG115	d__Bacteria;p__Bacteroidota;c__Kapabacteria;o__OLB7;f__OLB7;g__JAFDZV01;s__Unclassified	METABOLISM	I	Lipid transport and metabolism	141
MAG115	d__Bacteria;p__Bacteroidota;c__Kapabacteria;o__OLB7;f__OLB7;g__JAFDZV01;s__Unclassified	METABOLISM	P	Inorganic ion transport and metabolism	178
MAG115	d__Bacteria;p__Bacteroidota;c__Kapabacteria;o__OLB7;f__OLB7;g__JAFDZV01;s__Unclassified	METABOLISM	Q	Secondary metabolites biosynthesis, transport and catabolism	71
MAG115	d__Bacteria;p__Bacteroidota;c__Kapabacteria;o__OLB7;f__OLB7;g__JAFDZV01;s__Unclassified	POORLY CHARACTERIZED	R	General function prediction only	322
MAG115	d__Bacteria;p__Bacteroidota;c__Kapabacteria;o__OLB7;f__OLB7;g__JAFDZV01;s__Unclassified	POORLY CHARACTERIZED	S	Function unknown	161
MAG116	d__Bacteria;p__Actinomycetota;c__Actinomycetia;o__Mycobacteriales;f__Mycobacteriaceae;g__Aldersonia;s__Unclassified	CELLULAR PROCESSES AND SIGNALING	D	Cell cycle control, cell division, chromosome partitioning	46
MAG116	d__Bacteria;p__Actinomycetota;c__Actinomycetia;o__Mycobacteriales;f__Mycobacteriaceae;g__Aldersonia;s__Unclassified	CELLULAR PROCESSES AND SIGNALING	M	Cell wall/membrane/envelope biogenesis	223
MAG116	d__Bacteria;p__Actinomycetota;c__Actinomycetia;o__Mycobacteriales;f__Mycobacteriaceae;g__Aldersonia;s__Unclassified	CELLULAR PROCESSES AND SIGNALING	N	Cell motility	14
MAG116	d__Bacteria;p__Actinomycetota;c__Actinomycetia;o__Mycobacteriales;f__Mycobacteriaceae;g__Aldersonia;s__Unclassified	CELLULAR PROCESSES AND SIGNALING	O	Posttranslational modification, protein turnover, chaperones	169
MAG116	d__Bacteria;p__Actinomycetota;c__Actinomycetia;o__Mycobacteriales;f__Mycobacteriaceae;g__Aldersonia;s__Unclassified	CELLULAR PROCESSES AND SIGNALING	T	Signal transduction mechanisms	163
MAG116	d__Bacteria;p__Actinomycetota;c__Actinomycetia;o__Mycobacteriales;f__Mycobacteriaceae;g__Aldersonia;s__Unclassified	CELLULAR PROCESSES AND SIGNALING	U	Intracellular trafficking, secretion, and vesicular transport	27
MAG116	d__Bacteria;p__Actinomycetota;c__Actinomycetia;o__Mycobacteriales;f__Mycobacteriaceae;g__Aldersonia;s__Unclassified	CELLULAR PROCESSES AND SIGNALING	V	Defense mechanisms	151
MAG116	d__Bacteria;p__Actinomycetota;c__Actinomycetia;o__Mycobacteriales;f__Mycobacteriaceae;g__Aldersonia;s__Unclassified	CELLULAR PROCESSES AND SIGNALING	W	Extracellular structures	5
MAG116	d__Bacteria;p__Actinomycetota;c__Actinomycetia;o__Mycobacteriales;f__Mycobacteriaceae;g__Aldersonia;s__Unclassified	CELLULAR PROCESSES AND SIGNALING	X	Mobilome: prophages, transposons	40
MAG116	d__Bacteria;p__Actinomycetota;c__Actinomycetia;o__Mycobacteriales;f__Mycobacteriaceae;g__Aldersonia;s__Unclassified	INFORMATION STORAGE AND PROCESSING	A	RNA processing and modification	1
MAG116	d__Bacteria;p__Actinomycetota;c__Actinomycetia;o__Mycobacteriales;f__Mycobacteriaceae;g__Aldersonia;s__Unclassified	INFORMATION STORAGE AND PROCESSING	J	Translation, ribosomal structure and biogenesis	215
MAG116	d__Bacteria;p__Actinomycetota;c__Actinomycetia;o__Mycobacteriales;f__Mycobacteriaceae;g__Aldersonia;s__Unclassified	INFORMATION STORAGE AND PROCESSING	K	Transcription	364
MAG116	d__Bacteria;p__Actinomycetota;c__Actinomycetia;o__Mycobacteriales;f__Mycobacteriaceae;g__Aldersonia;s__Unclassified	INFORMATION STORAGE AND PROCESSING	L	Replication, recombination and repair	151
MAG116	d__Bacteria;p__Actinomycetota;c__Actinomycetia;o__Mycobacteriales;f__Mycobacteriaceae;g__Aldersonia;s__Unclassified	METABOLISM	C	Energy production and conversion	270
MAG116	d__Bacteria;p__Actinomycetota;c__Actinomycetia;o__Mycobacteriales;f__Mycobacteriaceae;g__Aldersonia;s__Unclassified	METABOLISM	E	Amino acid transport and metabolism	278
MAG116	d__Bacteria;p__Actinomycetota;c__Actinomycetia;o__Mycobacteriales;f__Mycobacteriaceae;g__Aldersonia;s__Unclassified	METABOLISM	F	Nucleotide transport and metabolism	102
MAG116	d__Bacteria;p__Actinomycetota;c__Actinomycetia;o__Mycobacteriales;f__Mycobacteriaceae;g__Aldersonia;s__Unclassified	METABOLISM	G	Carbohydrate transport and metabolism	234
MAG116	d__Bacteria;p__Actinomycetota;c__Actinomycetia;o__Mycobacteriales;f__Mycobacteriaceae;g__Aldersonia;s__Unclassified	METABOLISM	H	Coenzyme transport and metabolism	319
MAG116	d__Bacteria;p__Actinomycetota;c__Actinomycetia;o__Mycobacteriales;f__Mycobacteriaceae;g__Aldersonia;s__Unclassified	METABOLISM	I	Lipid transport and metabolism	496
MAG116	d__Bacteria;p__Actinomycetota;c__Actinomycetia;o__Mycobacteriales;f__Mycobacteriaceae;g__Aldersonia;s__Unclassified	METABOLISM	P	Inorganic ion transport and metabolism	248
MAG116	d__Bacteria;p__Actinomycetota;c__Actinomycetia;o__Mycobacteriales;f__Mycobacteriaceae;g__Aldersonia;s__Unclassified	METABOLISM	Q	Secondary metabolites biosynthesis, transport and catabolism	124
MAG116	d__Bacteria;p__Actinomycetota;c__Actinomycetia;o__Mycobacteriales;f__Mycobacteriaceae;g__Aldersonia;s__Unclassified	POORLY CHARACTERIZED	R	General function prediction only	446
MAG116	d__Bacteria;p__Actinomycetota;c__Actinomycetia;o__Mycobacteriales;f__Mycobacteriaceae;g__Aldersonia;s__Unclassified	POORLY CHARACTERIZED	S	Function unknown	151
MAG118	d__Bacteria;p__Pseudomonadota;c__Gammaproteobacteria;o__Xanthomonadales;f__Xanthomonadaceae;g__Luteimonas_D;s__Unclassified	CELLULAR PROCESSES AND SIGNALING	D	Cell cycle control, cell division, chromosome partitioning	50
MAG118	d__Bacteria;p__Pseudomonadota;c__Gammaproteobacteria;o__Xanthomonadales;f__Xanthomonadaceae;g__Luteimonas_D;s__Unclassified	CELLULAR PROCESSES AND SIGNALING	M	Cell wall/membrane/envelope biogenesis	231
MAG118	d__Bacteria;p__Pseudomonadota;c__Gammaproteobacteria;o__Xanthomonadales;f__Xanthomonadaceae;g__Luteimonas_D;s__Unclassified	CELLULAR PROCESSES AND SIGNALING	N	Cell motility	39
MAG118	d__Bacteria;p__Pseudomonadota;c__Gammaproteobacteria;o__Xanthomonadales;f__Xanthomonadaceae;g__Luteimonas_D;s__Unclassified	CELLULAR PROCESSES AND SIGNALING	O	Posttranslational modification, protein turnover, chaperones	175
MAG118	d__Bacteria;p__Pseudomonadota;c__Gammaproteobacteria;o__Xanthomonadales;f__Xanthomonadaceae;g__Luteimonas_D;s__Unclassified	CELLULAR PROCESSES AND SIGNALING	T	Signal transduction mechanisms	146
MAG118	d__Bacteria;p__Pseudomonadota;c__Gammaproteobacteria;o__Xanthomonadales;f__Xanthomonadaceae;g__Luteimonas_D;s__Unclassified	CELLULAR PROCESSES AND SIGNALING	U	Intracellular trafficking, secretion, and vesicular transport	79
MAG118	d__Bacteria;p__Pseudomonadota;c__Gammaproteobacteria;o__Xanthomonadales;f__Xanthomonadaceae;g__Luteimonas_D;s__Unclassified	CELLULAR PROCESSES AND SIGNALING	V	Defense mechanisms	95
MAG118	d__Bacteria;p__Pseudomonadota;c__Gammaproteobacteria;o__Xanthomonadales;f__Xanthomonadaceae;g__Luteimonas_D;s__Unclassified	CELLULAR PROCESSES AND SIGNALING	W	Extracellular structures	26
MAG118	d__Bacteria;p__Pseudomonadota;c__Gammaproteobacteria;o__Xanthomonadales;f__Xanthomonadaceae;g__Luteimonas_D;s__Unclassified	CELLULAR PROCESSES AND SIGNALING	X	Mobilome: prophages, transposons	24
MAG118	d__Bacteria;p__Pseudomonadota;c__Gammaproteobacteria;o__Xanthomonadales;f__Xanthomonadaceae;g__Luteimonas_D;s__Unclassified	CELLULAR PROCESSES AND SIGNALING	Z	Cytoskeleton	3
MAG118	d__Bacteria;p__Pseudomonadota;c__Gammaproteobacteria;o__Xanthomonadales;f__Xanthomonadaceae;g__Luteimonas_D;s__Unclassified	INFORMATION STORAGE AND PROCESSING	J	Translation, ribosomal structure and biogenesis	236
MAG118	d__Bacteria;p__Pseudomonadota;c__Gammaproteobacteria;o__Xanthomonadales;f__Xanthomonadaceae;g__Luteimonas_D;s__Unclassified	INFORMATION STORAGE AND PROCESSING	K	Transcription	110
MAG118	d__Bacteria;p__Pseudomonadota;c__Gammaproteobacteria;o__Xanthomonadales;f__Xanthomonadaceae;g__Luteimonas_D;s__Unclassified	INFORMATION STORAGE AND PROCESSING	L	Replication, recombination and repair	122
MAG118	d__Bacteria;p__Pseudomonadota;c__Gammaproteobacteria;o__Xanthomonadales;f__Xanthomonadaceae;g__Luteimonas_D;s__Unclassified	METABOLISM	C	Energy production and conversion	189
MAG118	d__Bacteria;p__Pseudomonadota;c__Gammaproteobacteria;o__Xanthomonadales;f__Xanthomonadaceae;g__Luteimonas_D;s__Unclassified	METABOLISM	E	Amino acid transport and metabolism	192
MAG118	d__Bacteria;p__Pseudomonadota;c__Gammaproteobacteria;o__Xanthomonadales;f__Xanthomonadaceae;g__Luteimonas_D;s__Unclassified	METABOLISM	F	Nucleotide transport and metabolism	63
MAG118	d__Bacteria;p__Pseudomonadota;c__Gammaproteobacteria;o__Xanthomonadales;f__Xanthomonadaceae;g__Luteimonas_D;s__Unclassified	METABOLISM	G	Carbohydrate transport and metabolism	87
MAG118	d__Bacteria;p__Pseudomonadota;c__Gammaproteobacteria;o__Xanthomonadales;f__Xanthomonadaceae;g__Luteimonas_D;s__Unclassified	METABOLISM	H	Coenzyme transport and metabolism	150
MAG118	d__Bacteria;p__Pseudomonadota;c__Gammaproteobacteria;o__Xanthomonadales;f__Xanthomonadaceae;g__Luteimonas_D;s__Unclassified	METABOLISM	I	Lipid transport and metabolism	146
MAG118	d__Bacteria;p__Pseudomonadota;c__Gammaproteobacteria;o__Xanthomonadales;f__Xanthomonadaceae;g__Luteimonas_D;s__Unclassified	METABOLISM	P	Inorganic ion transport and metabolism	136
MAG118	d__Bacteria;p__Pseudomonadota;c__Gammaproteobacteria;o__Xanthomonadales;f__Xanthomonadaceae;g__Luteimonas_D;s__Unclassified	METABOLISM	Q	Secondary metabolites biosynthesis, transport and catabolism	48
MAG118	d__Bacteria;p__Pseudomonadota;c__Gammaproteobacteria;o__Xanthomonadales;f__Xanthomonadaceae;g__Luteimonas_D;s__Unclassified	POORLY CHARACTERIZED	R	General function prediction only	163
MAG118	d__Bacteria;p__Pseudomonadota;c__Gammaproteobacteria;o__Xanthomonadales;f__Xanthomonadaceae;g__Luteimonas_D;s__Unclassified	POORLY CHARACTERIZED	S	Function unknown	103
MAG119	d__Bacteria;p__Pseudomonadota;c__Gammaproteobacteria;o__Burkholderiales;f__Usitatibacteraceae;g__Usitatibacter;s__Unclassified	CELLULAR PROCESSES AND SIGNALING	D	Cell cycle control, cell division, chromosome partitioning	51
MAG119	d__Bacteria;p__Pseudomonadota;c__Gammaproteobacteria;o__Burkholderiales;f__Usitatibacteraceae;g__Usitatibacter;s__Unclassified	CELLULAR PROCESSES AND SIGNALING	M	Cell wall/membrane/envelope biogenesis	290
MAG119	d__Bacteria;p__Pseudomonadota;c__Gammaproteobacteria;o__Burkholderiales;f__Usitatibacteraceae;g__Usitatibacter;s__Unclassified	CELLULAR PROCESSES AND SIGNALING	N	Cell motility	51
MAG119	d__Bacteria;p__Pseudomonadota;c__Gammaproteobacteria;o__Burkholderiales;f__Usitatibacteraceae;g__Usitatibacter;s__Unclassified	CELLULAR PROCESSES AND SIGNALING	O	Posttranslational modification, protein turnover, chaperones	244
MAG119	d__Bacteria;p__Pseudomonadota;c__Gammaproteobacteria;o__Burkholderiales;f__Usitatibacteraceae;g__Usitatibacter;s__Unclassified	CELLULAR PROCESSES AND SIGNALING	T	Signal transduction mechanisms	346
MAG119	d__Bacteria;p__Pseudomonadota;c__Gammaproteobacteria;o__Burkholderiales;f__Usitatibacteraceae;g__Usitatibacter;s__Unclassified	CELLULAR PROCESSES AND SIGNALING	U	Intracellular trafficking, secretion, and vesicular transport	60
MAG119	d__Bacteria;p__Pseudomonadota;c__Gammaproteobacteria;o__Burkholderiales;f__Usitatibacteraceae;g__Usitatibacter;s__Unclassified	CELLULAR PROCESSES AND SIGNALING	V	Defense mechanisms	95
MAG119	d__Bacteria;p__Pseudomonadota;c__Gammaproteobacteria;o__Burkholderiales;f__Usitatibacteraceae;g__Usitatibacter;s__Unclassified	CELLULAR PROCESSES AND SIGNALING	W	Extracellular structures	50
MAG119	d__Bacteria;p__Pseudomonadota;c__Gammaproteobacteria;o__Burkholderiales;f__Usitatibacteraceae;g__Usitatibacter;s__Unclassified	CELLULAR PROCESSES AND SIGNALING	X	Mobilome: prophages, transposons	16
MAG119	d__Bacteria;p__Pseudomonadota;c__Gammaproteobacteria;o__Burkholderiales;f__Usitatibacteraceae;g__Usitatibacter;s__Unclassified	CELLULAR PROCESSES AND SIGNALING	Z	Cytoskeleton	5
MAG119	d__Bacteria;p__Pseudomonadota;c__Gammaproteobacteria;o__Burkholderiales;f__Usitatibacteraceae;g__Usitatibacter;s__Unclassified	INFORMATION STORAGE AND PROCESSING	A	RNA processing and modification	1
MAG119	d__Bacteria;p__Pseudomonadota;c__Gammaproteobacteria;o__Burkholderiales;f__Usitatibacteraceae;g__Usitatibacter;s__Unclassified	INFORMATION STORAGE AND PROCESSING	B	Chromatin structure and dynamics	1
MAG119	d__Bacteria;p__Pseudomonadota;c__Gammaproteobacteria;o__Burkholderiales;f__Usitatibacteraceae;g__Usitatibacter;s__Unclassified	INFORMATION STORAGE AND PROCESSING	J	Translation, ribosomal structure and biogenesis	238
MAG119	d__Bacteria;p__Pseudomonadota;c__Gammaproteobacteria;o__Burkholderiales;f__Usitatibacteraceae;g__Usitatibacter;s__Unclassified	INFORMATION STORAGE AND PROCESSING	K	Transcription	247
MAG119	d__Bacteria;p__Pseudomonadota;c__Gammaproteobacteria;o__Burkholderiales;f__Usitatibacteraceae;g__Usitatibacter;s__Unclassified	INFORMATION STORAGE AND PROCESSING	L	Replication, recombination and repair	117
MAG119	d__Bacteria;p__Pseudomonadota;c__Gammaproteobacteria;o__Burkholderiales;f__Usitatibacteraceae;g__Usitatibacter;s__Unclassified	METABOLISM	C	Energy production and conversion	338
MAG119	d__Bacteria;p__Pseudomonadota;c__Gammaproteobacteria;o__Burkholderiales;f__Usitatibacteraceae;g__Usitatibacter;s__Unclassified	METABOLISM	E	Amino acid transport and metabolism	447
MAG119	d__Bacteria;p__Pseudomonadota;c__Gammaproteobacteria;o__Burkholderiales;f__Usitatibacteraceae;g__Usitatibacter;s__Unclassified	METABOLISM	F	Nucleotide transport and metabolism	73
MAG119	d__Bacteria;p__Pseudomonadota;c__Gammaproteobacteria;o__Burkholderiales;f__Usitatibacteraceae;g__Usitatibacter;s__Unclassified	METABOLISM	G	Carbohydrate transport and metabolism	227
MAG119	d__Bacteria;p__Pseudomonadota;c__Gammaproteobacteria;o__Burkholderiales;f__Usitatibacteraceae;g__Usitatibacter;s__Unclassified	METABOLISM	H	Coenzyme transport and metabolism	250
MAG119	d__Bacteria;p__Pseudomonadota;c__Gammaproteobacteria;o__Burkholderiales;f__Usitatibacteraceae;g__Usitatibacter;s__Unclassified	METABOLISM	I	Lipid transport and metabolism	220
MAG119	d__Bacteria;p__Pseudomonadota;c__Gammaproteobacteria;o__Burkholderiales;f__Usitatibacteraceae;g__Usitatibacter;s__Unclassified	METABOLISM	P	Inorganic ion transport and metabolism	261
MAG119	d__Bacteria;p__Pseudomonadota;c__Gammaproteobacteria;o__Burkholderiales;f__Usitatibacteraceae;g__Usitatibacter;s__Unclassified	METABOLISM	Q	Secondary metabolites biosynthesis, transport and catabolism	90
MAG119	d__Bacteria;p__Pseudomonadota;c__Gammaproteobacteria;o__Burkholderiales;f__Usitatibacteraceae;g__Usitatibacter;s__Unclassified	POORLY CHARACTERIZED	R	General function prediction only	351
MAG119	d__Bacteria;p__Pseudomonadota;c__Gammaproteobacteria;o__Burkholderiales;f__Usitatibacteraceae;g__Usitatibacter;s__Unclassified	POORLY CHARACTERIZED	S	Function unknown	162
MAG12	d__Bacteria;p__Acidobacteriota;c__Blastocatellia;o__Pyrinomonadales;f__Pyrinomonadaceae;g__QHXN01;s__Unclassified	CELLULAR PROCESSES AND SIGNALING	D	Cell cycle control, cell division, chromosome partitioning	72
MAG12	d__Bacteria;p__Acidobacteriota;c__Blastocatellia;o__Pyrinomonadales;f__Pyrinomonadaceae;g__QHXN01;s__Unclassified	CELLULAR PROCESSES AND SIGNALING	M	Cell wall/membrane/envelope biogenesis	257
MAG12	d__Bacteria;p__Acidobacteriota;c__Blastocatellia;o__Pyrinomonadales;f__Pyrinomonadaceae;g__QHXN01;s__Unclassified	CELLULAR PROCESSES AND SIGNALING	N	Cell motility	61
MAG12	d__Bacteria;p__Acidobacteriota;c__Blastocatellia;o__Pyrinomonadales;f__Pyrinomonadaceae;g__QHXN01;s__Unclassified	CELLULAR PROCESSES AND SIGNALING	O	Posttranslational modification, protein turnover, chaperones	220
MAG12	d__Bacteria;p__Acidobacteriota;c__Blastocatellia;o__Pyrinomonadales;f__Pyrinomonadaceae;g__QHXN01;s__Unclassified	CELLULAR PROCESSES AND SIGNALING	T	Signal transduction mechanisms	274
MAG12	d__Bacteria;p__Acidobacteriota;c__Blastocatellia;o__Pyrinomonadales;f__Pyrinomonadaceae;g__QHXN01;s__Unclassified	CELLULAR PROCESSES AND SIGNALING	U	Intracellular trafficking, secretion, and vesicular transport	88
MAG12	d__Bacteria;p__Acidobacteriota;c__Blastocatellia;o__Pyrinomonadales;f__Pyrinomonadaceae;g__QHXN01;s__Unclassified	CELLULAR PROCESSES AND SIGNALING	V	Defense mechanisms	110
MAG12	d__Bacteria;p__Acidobacteriota;c__Blastocatellia;o__Pyrinomonadales;f__Pyrinomonadaceae;g__QHXN01;s__Unclassified	CELLULAR PROCESSES AND SIGNALING	W	Extracellular structures	68
MAG12	d__Bacteria;p__Acidobacteriota;c__Blastocatellia;o__Pyrinomonadales;f__Pyrinomonadaceae;g__QHXN01;s__Unclassified	CELLULAR PROCESSES AND SIGNALING	X	Mobilome: prophages, transposons	20
MAG12	d__Bacteria;p__Acidobacteriota;c__Blastocatellia;o__Pyrinomonadales;f__Pyrinomonadaceae;g__QHXN01;s__Unclassified	CELLULAR PROCESSES AND SIGNALING	Z	Cytoskeleton	8
MAG12	d__Bacteria;p__Acidobacteriota;c__Blastocatellia;o__Pyrinomonadales;f__Pyrinomonadaceae;g__QHXN01;s__Unclassified	INFORMATION STORAGE AND PROCESSING	J	Translation, ribosomal structure and biogenesis	192
MAG12	d__Bacteria;p__Acidobacteriota;c__Blastocatellia;o__Pyrinomonadales;f__Pyrinomonadaceae;g__QHXN01;s__Unclassified	INFORMATION STORAGE AND PROCESSING	K	Transcription	159
MAG12	d__Bacteria;p__Acidobacteriota;c__Blastocatellia;o__Pyrinomonadales;f__Pyrinomonadaceae;g__QHXN01;s__Unclassified	INFORMATION STORAGE AND PROCESSING	L	Replication, recombination and repair	114
MAG12	d__Bacteria;p__Acidobacteriota;c__Blastocatellia;o__Pyrinomonadales;f__Pyrinomonadaceae;g__QHXN01;s__Unclassified	METABOLISM	C	Energy production and conversion	174
MAG12	d__Bacteria;p__Acidobacteriota;c__Blastocatellia;o__Pyrinomonadales;f__Pyrinomonadaceae;g__QHXN01;s__Unclassified	METABOLISM	E	Amino acid transport and metabolism	301
MAG12	d__Bacteria;p__Acidobacteriota;c__Blastocatellia;o__Pyrinomonadales;f__Pyrinomonadaceae;g__QHXN01;s__Unclassified	METABOLISM	F	Nucleotide transport and metabolism	59
MAG12	d__Bacteria;p__Acidobacteriota;c__Blastocatellia;o__Pyrinomonadales;f__Pyrinomonadaceae;g__QHXN01;s__Unclassified	METABOLISM	G	Carbohydrate transport and metabolism	282
MAG12	d__Bacteria;p__Acidobacteriota;c__Blastocatellia;o__Pyrinomonadales;f__Pyrinomonadaceae;g__QHXN01;s__Unclassified	METABOLISM	H	Coenzyme transport and metabolism	183
MAG12	d__Bacteria;p__Acidobacteriota;c__Blastocatellia;o__Pyrinomonadales;f__Pyrinomonadaceae;g__QHXN01;s__Unclassified	METABOLISM	I	Lipid transport and metabolism	171
MAG12	d__Bacteria;p__Acidobacteriota;c__Blastocatellia;o__Pyrinomonadales;f__Pyrinomonadaceae;g__QHXN01;s__Unclassified	METABOLISM	P	Inorganic ion transport and metabolism	142
MAG12	d__Bacteria;p__Acidobacteriota;c__Blastocatellia;o__Pyrinomonadales;f__Pyrinomonadaceae;g__QHXN01;s__Unclassified	METABOLISM	Q	Secondary metabolites biosynthesis, transport and catabolism	93
MAG12	d__Bacteria;p__Acidobacteriota;c__Blastocatellia;o__Pyrinomonadales;f__Pyrinomonadaceae;g__QHXN01;s__Unclassified	POORLY CHARACTERIZED	R	General function prediction only	309
MAG12	d__Bacteria;p__Acidobacteriota;c__Blastocatellia;o__Pyrinomonadales;f__Pyrinomonadaceae;g__QHXN01;s__Unclassified	POORLY CHARACTERIZED	S	Function unknown	89
MAG126	d__Bacteria;p__Nitrospirota;c__Nitrospiria;o__Nitrospirales;f__Nitrospiraceae;g__Nitrospira_F;s__Unclassified	CELLULAR PROCESSES AND SIGNALING	D	Cell cycle control, cell division, chromosome partitioning	29
MAG126	d__Bacteria;p__Nitrospirota;c__Nitrospiria;o__Nitrospirales;f__Nitrospiraceae;g__Nitrospira_F;s__Unclassified	CELLULAR PROCESSES AND SIGNALING	M	Cell wall/membrane/envelope biogenesis	166
MAG126	d__Bacteria;p__Nitrospirota;c__Nitrospiria;o__Nitrospirales;f__Nitrospiraceae;g__Nitrospira_F;s__Unclassified	CELLULAR PROCESSES AND SIGNALING	N	Cell motility	38
MAG126	d__Bacteria;p__Nitrospirota;c__Nitrospiria;o__Nitrospirales;f__Nitrospiraceae;g__Nitrospira_F;s__Unclassified	CELLULAR PROCESSES AND SIGNALING	O	Posttranslational modification, protein turnover, chaperones	101
MAG126	d__Bacteria;p__Nitrospirota;c__Nitrospiria;o__Nitrospirales;f__Nitrospiraceae;g__Nitrospira_F;s__Unclassified	CELLULAR PROCESSES AND SIGNALING	T	Signal transduction mechanisms	146
MAG126	d__Bacteria;p__Nitrospirota;c__Nitrospiria;o__Nitrospirales;f__Nitrospiraceae;g__Nitrospira_F;s__Unclassified	CELLULAR PROCESSES AND SIGNALING	U	Intracellular trafficking, secretion, and vesicular transport	35
MAG126	d__Bacteria;p__Nitrospirota;c__Nitrospiria;o__Nitrospirales;f__Nitrospiraceae;g__Nitrospira_F;s__Unclassified	CELLULAR PROCESSES AND SIGNALING	V	Defense mechanisms	55
MAG126	d__Bacteria;p__Nitrospirota;c__Nitrospiria;o__Nitrospirales;f__Nitrospiraceae;g__Nitrospira_F;s__Unclassified	CELLULAR PROCESSES AND SIGNALING	W	Extracellular structures	22
MAG126	d__Bacteria;p__Nitrospirota;c__Nitrospiria;o__Nitrospirales;f__Nitrospiraceae;g__Nitrospira_F;s__Unclassified	CELLULAR PROCESSES AND SIGNALING	X	Mobilome: prophages, transposons	25
MAG126	d__Bacteria;p__Nitrospirota;c__Nitrospiria;o__Nitrospirales;f__Nitrospiraceae;g__Nitrospira_F;s__Unclassified	CELLULAR PROCESSES AND SIGNALING	Z	Cytoskeleton	5
MAG126	d__Bacteria;p__Nitrospirota;c__Nitrospiria;o__Nitrospirales;f__Nitrospiraceae;g__Nitrospira_F;s__Unclassified	INFORMATION STORAGE AND PROCESSING	J	Translation, ribosomal structure and biogenesis	143
MAG126	d__Bacteria;p__Nitrospirota;c__Nitrospiria;o__Nitrospirales;f__Nitrospiraceae;g__Nitrospira_F;s__Unclassified	INFORMATION STORAGE AND PROCESSING	K	Transcription	76
MAG126	d__Bacteria;p__Nitrospirota;c__Nitrospiria;o__Nitrospirales;f__Nitrospiraceae;g__Nitrospira_F;s__Unclassified	INFORMATION STORAGE AND PROCESSING	L	Replication, recombination and repair	67
MAG126	d__Bacteria;p__Nitrospirota;c__Nitrospiria;o__Nitrospirales;f__Nitrospiraceae;g__Nitrospira_F;s__Unclassified	METABOLISM	C	Energy production and conversion	131
MAG126	d__Bacteria;p__Nitrospirota;c__Nitrospiria;o__Nitrospirales;f__Nitrospiraceae;g__Nitrospira_F;s__Unclassified	METABOLISM	E	Amino acid transport and metabolism	120
MAG126	d__Bacteria;p__Nitrospirota;c__Nitrospiria;o__Nitrospirales;f__Nitrospiraceae;g__Nitrospira_F;s__Unclassified	METABOLISM	F	Nucleotide transport and metabolism	46
MAG126	d__Bacteria;p__Nitrospirota;c__Nitrospiria;o__Nitrospirales;f__Nitrospiraceae;g__Nitrospira_F;s__Unclassified	METABOLISM	G	Carbohydrate transport and metabolism	72
MAG126	d__Bacteria;p__Nitrospirota;c__Nitrospiria;o__Nitrospirales;f__Nitrospiraceae;g__Nitrospira_F;s__Unclassified	METABOLISM	H	Coenzyme transport and metabolism	107
MAG126	d__Bacteria;p__Nitrospirota;c__Nitrospiria;o__Nitrospirales;f__Nitrospiraceae;g__Nitrospira_F;s__Unclassified	METABOLISM	I	Lipid transport and metabolism	54
MAG126	d__Bacteria;p__Nitrospirota;c__Nitrospiria;o__Nitrospirales;f__Nitrospiraceae;g__Nitrospira_F;s__Unclassified	METABOLISM	P	Inorganic ion transport and metabolism	57
MAG126	d__Bacteria;p__Nitrospirota;c__Nitrospiria;o__Nitrospirales;f__Nitrospiraceae;g__Nitrospira_F;s__Unclassified	METABOLISM	Q	Secondary metabolites biosynthesis, transport and catabolism	15
MAG126	d__Bacteria;p__Nitrospirota;c__Nitrospiria;o__Nitrospirales;f__Nitrospiraceae;g__Nitrospira_F;s__Unclassified	POORLY CHARACTERIZED	R	General function prediction only	131
MAG126	d__Bacteria;p__Nitrospirota;c__Nitrospiria;o__Nitrospirales;f__Nitrospiraceae;g__Nitrospira_F;s__Unclassified	POORLY CHARACTERIZED	S	Function unknown	44
MAG127	d__Bacteria;p__Actinomycetota;c__Actinomycetia;o__Mycobacteriales;f__Mycobacteriaceae;g__Corynebacterium;s__Corynebacterium stationis	CELLULAR PROCESSES AND SIGNALING	D	Cell cycle control, cell division, chromosome partitioning	31
MAG127	d__Bacteria;p__Actinomycetota;c__Actinomycetia;o__Mycobacteriales;f__Mycobacteriaceae;g__Corynebacterium;s__Corynebacterium stationis	CELLULAR PROCESSES AND SIGNALING	M	Cell wall/membrane/envelope biogenesis	102
MAG127	d__Bacteria;p__Actinomycetota;c__Actinomycetia;o__Mycobacteriales;f__Mycobacteriaceae;g__Corynebacterium;s__Corynebacterium stationis	CELLULAR PROCESSES AND SIGNALING	N	Cell motility	8
MAG127	d__Bacteria;p__Actinomycetota;c__Actinomycetia;o__Mycobacteriales;f__Mycobacteriaceae;g__Corynebacterium;s__Corynebacterium stationis	CELLULAR PROCESSES AND SIGNALING	O	Posttranslational modification, protein turnover, chaperones	80
MAG127	d__Bacteria;p__Actinomycetota;c__Actinomycetia;o__Mycobacteriales;f__Mycobacteriaceae;g__Corynebacterium;s__Corynebacterium stationis	CELLULAR PROCESSES AND SIGNALING	T	Signal transduction mechanisms	65
MAG127	d__Bacteria;p__Actinomycetota;c__Actinomycetia;o__Mycobacteriales;f__Mycobacteriaceae;g__Corynebacterium;s__Corynebacterium stationis	CELLULAR PROCESSES AND SIGNALING	U	Intracellular trafficking, secretion, and vesicular transport	22
MAG127	d__Bacteria;p__Actinomycetota;c__Actinomycetia;o__Mycobacteriales;f__Mycobacteriaceae;g__Corynebacterium;s__Corynebacterium stationis	CELLULAR PROCESSES AND SIGNALING	V	Defense mechanisms	45
MAG127	d__Bacteria;p__Actinomycetota;c__Actinomycetia;o__Mycobacteriales;f__Mycobacteriaceae;g__Corynebacterium;s__Corynebacterium stationis	CELLULAR PROCESSES AND SIGNALING	W	Extracellular structures	5
MAG127	d__Bacteria;p__Actinomycetota;c__Actinomycetia;o__Mycobacteriales;f__Mycobacteriaceae;g__Corynebacterium;s__Corynebacterium stationis	CELLULAR PROCESSES AND SIGNALING	X	Mobilome: prophages, transposons	7
MAG127	d__Bacteria;p__Actinomycetota;c__Actinomycetia;o__Mycobacteriales;f__Mycobacteriaceae;g__Corynebacterium;s__Corynebacterium stationis	INFORMATION STORAGE AND PROCESSING	J	Translation, ribosomal structure and biogenesis	190
MAG127	d__Bacteria;p__Actinomycetota;c__Actinomycetia;o__Mycobacteriales;f__Mycobacteriaceae;g__Corynebacterium;s__Corynebacterium stationis	INFORMATION STORAGE AND PROCESSING	K	Transcription	133
MAG127	d__Bacteria;p__Actinomycetota;c__Actinomycetia;o__Mycobacteriales;f__Mycobacteriaceae;g__Corynebacterium;s__Corynebacterium stationis	INFORMATION STORAGE AND PROCESSING	L	Replication, recombination and repair	105
MAG127	d__Bacteria;p__Actinomycetota;c__Actinomycetia;o__Mycobacteriales;f__Mycobacteriaceae;g__Corynebacterium;s__Corynebacterium stationis	METABOLISM	C	Energy production and conversion	104
MAG127	d__Bacteria;p__Actinomycetota;c__Actinomycetia;o__Mycobacteriales;f__Mycobacteriaceae;g__Corynebacterium;s__Corynebacterium stationis	METABOLISM	E	Amino acid transport and metabolism	195
MAG127	d__Bacteria;p__Actinomycetota;c__Actinomycetia;o__Mycobacteriales;f__Mycobacteriaceae;g__Corynebacterium;s__Corynebacterium stationis	METABOLISM	F	Nucleotide transport and metabolism	71
MAG127	d__Bacteria;p__Actinomycetota;c__Actinomycetia;o__Mycobacteriales;f__Mycobacteriaceae;g__Corynebacterium;s__Corynebacterium stationis	METABOLISM	G	Carbohydrate transport and metabolism	135
MAG127	d__Bacteria;p__Actinomycetota;c__Actinomycetia;o__Mycobacteriales;f__Mycobacteriaceae;g__Corynebacterium;s__Corynebacterium stationis	METABOLISM	H	Coenzyme transport and metabolism	134
MAG127	d__Bacteria;p__Actinomycetota;c__Actinomycetia;o__Mycobacteriales;f__Mycobacteriaceae;g__Corynebacterium;s__Corynebacterium stationis	METABOLISM	I	Lipid transport and metabolism	98
MAG127	d__Bacteria;p__Actinomycetota;c__Actinomycetia;o__Mycobacteriales;f__Mycobacteriaceae;g__Corynebacterium;s__Corynebacterium stationis	METABOLISM	P	Inorganic ion transport and metabolism	129
MAG127	d__Bacteria;p__Actinomycetota;c__Actinomycetia;o__Mycobacteriales;f__Mycobacteriaceae;g__Corynebacterium;s__Corynebacterium stationis	METABOLISM	Q	Secondary metabolites biosynthesis, transport and catabolism	32
MAG127	d__Bacteria;p__Actinomycetota;c__Actinomycetia;o__Mycobacteriales;f__Mycobacteriaceae;g__Corynebacterium;s__Corynebacterium stationis	POORLY CHARACTERIZED	R	General function prediction only	132
MAG127	d__Bacteria;p__Actinomycetota;c__Actinomycetia;o__Mycobacteriales;f__Mycobacteriaceae;g__Corynebacterium;s__Corynebacterium stationis	POORLY CHARACTERIZED	S	Function unknown	63
MAG13	d__Bacteria;p__Pseudomonadota;c__Gammaproteobacteria;o__Burkholderiales;f__Burkholderiaceae_B;g__Rhodoferax_A;s__Rhodoferax_A sp004323695	CELLULAR PROCESSES AND SIGNALING	D	Cell cycle control, cell division, chromosome partitioning	43
MAG13	d__Bacteria;p__Pseudomonadota;c__Gammaproteobacteria;o__Burkholderiales;f__Burkholderiaceae_B;g__Rhodoferax_A;s__Rhodoferax_A sp004323695	CELLULAR PROCESSES AND SIGNALING	M	Cell wall/membrane/envelope biogenesis	191
MAG13	d__Bacteria;p__Pseudomonadota;c__Gammaproteobacteria;o__Burkholderiales;f__Burkholderiaceae_B;g__Rhodoferax_A;s__Rhodoferax_A sp004323695	CELLULAR PROCESSES AND SIGNALING	N	Cell motility	42
MAG13	d__Bacteria;p__Pseudomonadota;c__Gammaproteobacteria;o__Burkholderiales;f__Burkholderiaceae_B;g__Rhodoferax_A;s__Rhodoferax_A sp004323695	CELLULAR PROCESSES AND SIGNALING	O	Posttranslational modification, protein turnover, chaperones	179
MAG13	d__Bacteria;p__Pseudomonadota;c__Gammaproteobacteria;o__Burkholderiales;f__Burkholderiaceae_B;g__Rhodoferax_A;s__Rhodoferax_A sp004323695	CELLULAR PROCESSES AND SIGNALING	T	Signal transduction mechanisms	149
MAG13	d__Bacteria;p__Pseudomonadota;c__Gammaproteobacteria;o__Burkholderiales;f__Burkholderiaceae_B;g__Rhodoferax_A;s__Rhodoferax_A sp004323695	CELLULAR PROCESSES AND SIGNALING	U	Intracellular trafficking, secretion, and vesicular transport	47
MAG13	d__Bacteria;p__Pseudomonadota;c__Gammaproteobacteria;o__Burkholderiales;f__Burkholderiaceae_B;g__Rhodoferax_A;s__Rhodoferax_A sp004323695	CELLULAR PROCESSES AND SIGNALING	V	Defense mechanisms	72
MAG13	d__Bacteria;p__Pseudomonadota;c__Gammaproteobacteria;o__Burkholderiales;f__Burkholderiaceae_B;g__Rhodoferax_A;s__Rhodoferax_A sp004323695	CELLULAR PROCESSES AND SIGNALING	W	Extracellular structures	38
MAG13	d__Bacteria;p__Pseudomonadota;c__Gammaproteobacteria;o__Burkholderiales;f__Burkholderiaceae_B;g__Rhodoferax_A;s__Rhodoferax_A sp004323695	CELLULAR PROCESSES AND SIGNALING	X	Mobilome: prophages, transposons	25
MAG13	d__Bacteria;p__Pseudomonadota;c__Gammaproteobacteria;o__Burkholderiales;f__Burkholderiaceae_B;g__Rhodoferax_A;s__Rhodoferax_A sp004323695	CELLULAR PROCESSES AND SIGNALING	Z	Cytoskeleton	4
MAG13	d__Bacteria;p__Pseudomonadota;c__Gammaproteobacteria;o__Burkholderiales;f__Burkholderiaceae_B;g__Rhodoferax_A;s__Rhodoferax_A sp004323695	INFORMATION STORAGE AND PROCESSING	A	RNA processing and modification	1
MAG13	d__Bacteria;p__Pseudomonadota;c__Gammaproteobacteria;o__Burkholderiales;f__Burkholderiaceae_B;g__Rhodoferax_A;s__Rhodoferax_A sp004323695	INFORMATION STORAGE AND PROCESSING	B	Chromatin structure and dynamics	2
MAG13	d__Bacteria;p__Pseudomonadota;c__Gammaproteobacteria;o__Burkholderiales;f__Burkholderiaceae_B;g__Rhodoferax_A;s__Rhodoferax_A sp004323695	INFORMATION STORAGE AND PROCESSING	J	Translation, ribosomal structure and biogenesis	247
MAG13	d__Bacteria;p__Pseudomonadota;c__Gammaproteobacteria;o__Burkholderiales;f__Burkholderiaceae_B;g__Rhodoferax_A;s__Rhodoferax_A sp004323695	INFORMATION STORAGE AND PROCESSING	K	Transcription	213
MAG13	d__Bacteria;p__Pseudomonadota;c__Gammaproteobacteria;o__Burkholderiales;f__Burkholderiaceae_B;g__Rhodoferax_A;s__Rhodoferax_A sp004323695	INFORMATION STORAGE AND PROCESSING	L	Replication, recombination and repair	126
MAG13	d__Bacteria;p__Pseudomonadota;c__Gammaproteobacteria;o__Burkholderiales;f__Burkholderiaceae_B;g__Rhodoferax_A;s__Rhodoferax_A sp004323695	METABOLISM	C	Energy production and conversion	250
MAG13	d__Bacteria;p__Pseudomonadota;c__Gammaproteobacteria;o__Burkholderiales;f__Burkholderiaceae_B;g__Rhodoferax_A;s__Rhodoferax_A sp004323695	METABOLISM	E	Amino acid transport and metabolism	348
MAG13	d__Bacteria;p__Pseudomonadota;c__Gammaproteobacteria;o__Burkholderiales;f__Burkholderiaceae_B;g__Rhodoferax_A;s__Rhodoferax_A sp004323695	METABOLISM	F	Nucleotide transport and metabolism	84
MAG13	d__Bacteria;p__Pseudomonadota;c__Gammaproteobacteria;o__Burkholderiales;f__Burkholderiaceae_B;g__Rhodoferax_A;s__Rhodoferax_A sp004323695	METABOLISM	G	Carbohydrate transport and metabolism	223
MAG13	d__Bacteria;p__Pseudomonadota;c__Gammaproteobacteria;o__Burkholderiales;f__Burkholderiaceae_B;g__Rhodoferax_A;s__Rhodoferax_A sp004323695	METABOLISM	H	Coenzyme transport and metabolism	196
MAG13	d__Bacteria;p__Pseudomonadota;c__Gammaproteobacteria;o__Burkholderiales;f__Burkholderiaceae_B;g__Rhodoferax_A;s__Rhodoferax_A sp004323695	METABOLISM	I	Lipid transport and metabolism	241
MAG13	d__Bacteria;p__Pseudomonadota;c__Gammaproteobacteria;o__Burkholderiales;f__Burkholderiaceae_B;g__Rhodoferax_A;s__Rhodoferax_A sp004323695	METABOLISM	P	Inorganic ion transport and metabolism	173
MAG13	d__Bacteria;p__Pseudomonadota;c__Gammaproteobacteria;o__Burkholderiales;f__Burkholderiaceae_B;g__Rhodoferax_A;s__Rhodoferax_A sp004323695	METABOLISM	Q	Secondary metabolites biosynthesis, transport and catabolism	78
MAG13	d__Bacteria;p__Pseudomonadota;c__Gammaproteobacteria;o__Burkholderiales;f__Burkholderiaceae_B;g__Rhodoferax_A;s__Rhodoferax_A sp004323695	POORLY CHARACTERIZED	R	General function prediction only	239
MAG13	d__Bacteria;p__Pseudomonadota;c__Gammaproteobacteria;o__Burkholderiales;f__Burkholderiaceae_B;g__Rhodoferax_A;s__Rhodoferax_A sp004323695	POORLY CHARACTERIZED	S	Function unknown	111
MAG130	d__Bacteria;p__Pseudomonadota;c__Gammaproteobacteria;o__Burkholderiales;f__SG8-41;g__Unclassified;s__Unclassified	CELLULAR PROCESSES AND SIGNALING	D	Cell cycle control, cell division, chromosome partitioning	33
MAG130	d__Bacteria;p__Pseudomonadota;c__Gammaproteobacteria;o__Burkholderiales;f__SG8-41;g__Unclassified;s__Unclassified	CELLULAR PROCESSES AND SIGNALING	M	Cell wall/membrane/envelope biogenesis	243
MAG130	d__Bacteria;p__Pseudomonadota;c__Gammaproteobacteria;o__Burkholderiales;f__SG8-41;g__Unclassified;s__Unclassified	CELLULAR PROCESSES AND SIGNALING	N	Cell motility	39
MAG130	d__Bacteria;p__Pseudomonadota;c__Gammaproteobacteria;o__Burkholderiales;f__SG8-41;g__Unclassified;s__Unclassified	CELLULAR PROCESSES AND SIGNALING	O	Posttranslational modification, protein turnover, chaperones	157
MAG130	d__Bacteria;p__Pseudomonadota;c__Gammaproteobacteria;o__Burkholderiales;f__SG8-41;g__Unclassified;s__Unclassified	CELLULAR PROCESSES AND SIGNALING	T	Signal transduction mechanisms	185
MAG130	d__Bacteria;p__Pseudomonadota;c__Gammaproteobacteria;o__Burkholderiales;f__SG8-41;g__Unclassified;s__Unclassified	CELLULAR PROCESSES AND SIGNALING	U	Intracellular trafficking, secretion, and vesicular transport	51
MAG130	d__Bacteria;p__Pseudomonadota;c__Gammaproteobacteria;o__Burkholderiales;f__SG8-41;g__Unclassified;s__Unclassified	CELLULAR PROCESSES AND SIGNALING	V	Defense mechanisms	78
MAG130	d__Bacteria;p__Pseudomonadota;c__Gammaproteobacteria;o__Burkholderiales;f__SG8-41;g__Unclassified;s__Unclassified	CELLULAR PROCESSES AND SIGNALING	W	Extracellular structures	29
MAG130	d__Bacteria;p__Pseudomonadota;c__Gammaproteobacteria;o__Burkholderiales;f__SG8-41;g__Unclassified;s__Unclassified	CELLULAR PROCESSES AND SIGNALING	X	Mobilome: prophages, transposons	3
MAG130	d__Bacteria;p__Pseudomonadota;c__Gammaproteobacteria;o__Burkholderiales;f__SG8-41;g__Unclassified;s__Unclassified	CELLULAR PROCESSES AND SIGNALING	Z	Cytoskeleton	3
MAG130	d__Bacteria;p__Pseudomonadota;c__Gammaproteobacteria;o__Burkholderiales;f__SG8-41;g__Unclassified;s__Unclassified	INFORMATION STORAGE AND PROCESSING	B	Chromatin structure and dynamics	1
MAG130	d__Bacteria;p__Pseudomonadota;c__Gammaproteobacteria;o__Burkholderiales;f__SG8-41;g__Unclassified;s__Unclassified	INFORMATION STORAGE AND PROCESSING	J	Translation, ribosomal structure and biogenesis	202
MAG130	d__Bacteria;p__Pseudomonadota;c__Gammaproteobacteria;o__Burkholderiales;f__SG8-41;g__Unclassified;s__Unclassified	INFORMATION STORAGE AND PROCESSING	K	Transcription	112
MAG130	d__Bacteria;p__Pseudomonadota;c__Gammaproteobacteria;o__Burkholderiales;f__SG8-41;g__Unclassified;s__Unclassified	INFORMATION STORAGE AND PROCESSING	L	Replication, recombination and repair	91
MAG130	d__Bacteria;p__Pseudomonadota;c__Gammaproteobacteria;o__Burkholderiales;f__SG8-41;g__Unclassified;s__Unclassified	METABOLISM	C	Energy production and conversion	388
MAG130	d__Bacteria;p__Pseudomonadota;c__Gammaproteobacteria;o__Burkholderiales;f__SG8-41;g__Unclassified;s__Unclassified	METABOLISM	E	Amino acid transport and metabolism	267
MAG130	d__Bacteria;p__Pseudomonadota;c__Gammaproteobacteria;o__Burkholderiales;f__SG8-41;g__Unclassified;s__Unclassified	METABOLISM	F	Nucleotide transport and metabolism	60
MAG130	d__Bacteria;p__Pseudomonadota;c__Gammaproteobacteria;o__Burkholderiales;f__SG8-41;g__Unclassified;s__Unclassified	METABOLISM	G	Carbohydrate transport and metabolism	152
MAG130	d__Bacteria;p__Pseudomonadota;c__Gammaproteobacteria;o__Burkholderiales;f__SG8-41;g__Unclassified;s__Unclassified	METABOLISM	H	Coenzyme transport and metabolism	179
MAG130	d__Bacteria;p__Pseudomonadota;c__Gammaproteobacteria;o__Burkholderiales;f__SG8-41;g__Unclassified;s__Unclassified	METABOLISM	I	Lipid transport and metabolism	175
MAG130	d__Bacteria;p__Pseudomonadota;c__Gammaproteobacteria;o__Burkholderiales;f__SG8-41;g__Unclassified;s__Unclassified	METABOLISM	P	Inorganic ion transport and metabolism	112
MAG130	d__Bacteria;p__Pseudomonadota;c__Gammaproteobacteria;o__Burkholderiales;f__SG8-41;g__Unclassified;s__Unclassified	METABOLISM	Q	Secondary metabolites biosynthesis, transport and catabolism	68
MAG130	d__Bacteria;p__Pseudomonadota;c__Gammaproteobacteria;o__Burkholderiales;f__SG8-41;g__Unclassified;s__Unclassified	POORLY CHARACTERIZED	R	General function prediction only	243
MAG130	d__Bacteria;p__Pseudomonadota;c__Gammaproteobacteria;o__Burkholderiales;f__SG8-41;g__Unclassified;s__Unclassified	POORLY CHARACTERIZED	S	Function unknown	82
MAG147	d__Bacteria;p__Nitrospirota;c__Nitrospiria;o__Nitrospirales;f__Nitrospiraceae;g__Nitrospira_F;s__Unclassified	CELLULAR PROCESSES AND SIGNALING	D	Cell cycle control, cell division, chromosome partitioning	45
MAG147	d__Bacteria;p__Nitrospirota;c__Nitrospiria;o__Nitrospirales;f__Nitrospiraceae;g__Nitrospira_F;s__Unclassified	CELLULAR PROCESSES AND SIGNALING	M	Cell wall/membrane/envelope biogenesis	201
MAG147	d__Bacteria;p__Nitrospirota;c__Nitrospiria;o__Nitrospirales;f__Nitrospiraceae;g__Nitrospira_F;s__Unclassified	CELLULAR PROCESSES AND SIGNALING	N	Cell motility	40
MAG147	d__Bacteria;p__Nitrospirota;c__Nitrospiria;o__Nitrospirales;f__Nitrospiraceae;g__Nitrospira_F;s__Unclassified	CELLULAR PROCESSES AND SIGNALING	O	Posttranslational modification, protein turnover, chaperones	161
MAG147	d__Bacteria;p__Nitrospirota;c__Nitrospiria;o__Nitrospirales;f__Nitrospiraceae;g__Nitrospira_F;s__Unclassified	CELLULAR PROCESSES AND SIGNALING	T	Signal transduction mechanisms	205
MAG147	d__Bacteria;p__Nitrospirota;c__Nitrospiria;o__Nitrospirales;f__Nitrospiraceae;g__Nitrospira_F;s__Unclassified	CELLULAR PROCESSES AND SIGNALING	U	Intracellular trafficking, secretion, and vesicular transport	53
MAG147	d__Bacteria;p__Nitrospirota;c__Nitrospiria;o__Nitrospirales;f__Nitrospiraceae;g__Nitrospira_F;s__Unclassified	CELLULAR PROCESSES AND SIGNALING	V	Defense mechanisms	97
MAG147	d__Bacteria;p__Nitrospirota;c__Nitrospiria;o__Nitrospirales;f__Nitrospiraceae;g__Nitrospira_F;s__Unclassified	CELLULAR PROCESSES AND SIGNALING	W	Extracellular structures	40
MAG147	d__Bacteria;p__Nitrospirota;c__Nitrospiria;o__Nitrospirales;f__Nitrospiraceae;g__Nitrospira_F;s__Unclassified	CELLULAR PROCESSES AND SIGNALING	X	Mobilome: prophages, transposons	27
MAG147	d__Bacteria;p__Nitrospirota;c__Nitrospiria;o__Nitrospirales;f__Nitrospiraceae;g__Nitrospira_F;s__Unclassified	CELLULAR PROCESSES AND SIGNALING	Z	Cytoskeleton	9
MAG147	d__Bacteria;p__Nitrospirota;c__Nitrospiria;o__Nitrospirales;f__Nitrospiraceae;g__Nitrospira_F;s__Unclassified	INFORMATION STORAGE AND PROCESSING	J	Translation, ribosomal structure and biogenesis	190
MAG147	d__Bacteria;p__Nitrospirota;c__Nitrospiria;o__Nitrospirales;f__Nitrospiraceae;g__Nitrospira_F;s__Unclassified	INFORMATION STORAGE AND PROCESSING	K	Transcription	110
MAG147	d__Bacteria;p__Nitrospirota;c__Nitrospiria;o__Nitrospirales;f__Nitrospiraceae;g__Nitrospira_F;s__Unclassified	INFORMATION STORAGE AND PROCESSING	L	Replication, recombination and repair	110
MAG147	d__Bacteria;p__Nitrospirota;c__Nitrospiria;o__Nitrospirales;f__Nitrospiraceae;g__Nitrospira_F;s__Unclassified	METABOLISM	C	Energy production and conversion	163
MAG147	d__Bacteria;p__Nitrospirota;c__Nitrospiria;o__Nitrospirales;f__Nitrospiraceae;g__Nitrospira_F;s__Unclassified	METABOLISM	E	Amino acid transport and metabolism	130
MAG147	d__Bacteria;p__Nitrospirota;c__Nitrospiria;o__Nitrospirales;f__Nitrospiraceae;g__Nitrospira_F;s__Unclassified	METABOLISM	F	Nucleotide transport and metabolism	53
MAG147	d__Bacteria;p__Nitrospirota;c__Nitrospiria;o__Nitrospirales;f__Nitrospiraceae;g__Nitrospira_F;s__Unclassified	METABOLISM	G	Carbohydrate transport and metabolism	123
MAG147	d__Bacteria;p__Nitrospirota;c__Nitrospiria;o__Nitrospirales;f__Nitrospiraceae;g__Nitrospira_F;s__Unclassified	METABOLISM	H	Coenzyme transport and metabolism	148
MAG147	d__Bacteria;p__Nitrospirota;c__Nitrospiria;o__Nitrospirales;f__Nitrospiraceae;g__Nitrospira_F;s__Unclassified	METABOLISM	I	Lipid transport and metabolism	75
MAG147	d__Bacteria;p__Nitrospirota;c__Nitrospiria;o__Nitrospirales;f__Nitrospiraceae;g__Nitrospira_F;s__Unclassified	METABOLISM	P	Inorganic ion transport and metabolism	114
MAG147	d__Bacteria;p__Nitrospirota;c__Nitrospiria;o__Nitrospirales;f__Nitrospiraceae;g__Nitrospira_F;s__Unclassified	METABOLISM	Q	Secondary metabolites biosynthesis, transport and catabolism	35
MAG147	d__Bacteria;p__Nitrospirota;c__Nitrospiria;o__Nitrospirales;f__Nitrospiraceae;g__Nitrospira_F;s__Unclassified	POORLY CHARACTERIZED	R	General function prediction only	194
MAG147	d__Bacteria;p__Nitrospirota;c__Nitrospiria;o__Nitrospirales;f__Nitrospiraceae;g__Nitrospira_F;s__Unclassified	POORLY CHARACTERIZED	S	Function unknown	92
MAG15	d__Bacteria;p__Cyanobacteriota;c__Cyanobacteriia;o__Cyanobacteriales;f__Coleofasciculaceae;g__Allocoleopsis;s__Unclassified	CELLULAR PROCESSES AND SIGNALING	D	Cell cycle control, cell division, chromosome partitioning	94
MAG15	d__Bacteria;p__Cyanobacteriota;c__Cyanobacteriia;o__Cyanobacteriales;f__Coleofasciculaceae;g__Allocoleopsis;s__Unclassified	CELLULAR PROCESSES AND SIGNALING	M	Cell wall/membrane/envelope biogenesis	368
MAG15	d__Bacteria;p__Cyanobacteriota;c__Cyanobacteriia;o__Cyanobacteriales;f__Coleofasciculaceae;g__Allocoleopsis;s__Unclassified	CELLULAR PROCESSES AND SIGNALING	N	Cell motility	40
MAG15	d__Bacteria;p__Cyanobacteriota;c__Cyanobacteriia;o__Cyanobacteriales;f__Coleofasciculaceae;g__Allocoleopsis;s__Unclassified	CELLULAR PROCESSES AND SIGNALING	O	Posttranslational modification, protein turnover, chaperones	250
MAG15	d__Bacteria;p__Cyanobacteriota;c__Cyanobacteriia;o__Cyanobacteriales;f__Coleofasciculaceae;g__Allocoleopsis;s__Unclassified	CELLULAR PROCESSES AND SIGNALING	T	Signal transduction mechanisms	845
MAG15	d__Bacteria;p__Cyanobacteriota;c__Cyanobacteriia;o__Cyanobacteriales;f__Coleofasciculaceae;g__Allocoleopsis;s__Unclassified	CELLULAR PROCESSES AND SIGNALING	U	Intracellular trafficking, secretion, and vesicular transport	85
MAG15	d__Bacteria;p__Cyanobacteriota;c__Cyanobacteriia;o__Cyanobacteriales;f__Coleofasciculaceae;g__Allocoleopsis;s__Unclassified	CELLULAR PROCESSES AND SIGNALING	V	Defense mechanisms	141
MAG15	d__Bacteria;p__Cyanobacteriota;c__Cyanobacteriia;o__Cyanobacteriales;f__Coleofasciculaceae;g__Allocoleopsis;s__Unclassified	CELLULAR PROCESSES AND SIGNALING	W	Extracellular structures	20
MAG15	d__Bacteria;p__Cyanobacteriota;c__Cyanobacteriia;o__Cyanobacteriales;f__Coleofasciculaceae;g__Allocoleopsis;s__Unclassified	CELLULAR PROCESSES AND SIGNALING	X	Mobilome: prophages, transposons	76
MAG15	d__Bacteria;p__Cyanobacteriota;c__Cyanobacteriia;o__Cyanobacteriales;f__Coleofasciculaceae;g__Allocoleopsis;s__Unclassified	CELLULAR PROCESSES AND SIGNALING	Z	Cytoskeleton	4
MAG15	d__Bacteria;p__Cyanobacteriota;c__Cyanobacteriia;o__Cyanobacteriales;f__Coleofasciculaceae;g__Allocoleopsis;s__Unclassified	INFORMATION STORAGE AND PROCESSING	J	Translation, ribosomal structure and biogenesis	267
MAG15	d__Bacteria;p__Cyanobacteriota;c__Cyanobacteriia;o__Cyanobacteriales;f__Coleofasciculaceae;g__Allocoleopsis;s__Unclassified	INFORMATION STORAGE AND PROCESSING	K	Transcription	234
MAG15	d__Bacteria;p__Cyanobacteriota;c__Cyanobacteriia;o__Cyanobacteriales;f__Coleofasciculaceae;g__Allocoleopsis;s__Unclassified	INFORMATION STORAGE AND PROCESSING	L	Replication, recombination and repair	166
MAG15	d__Bacteria;p__Cyanobacteriota;c__Cyanobacteriia;o__Cyanobacteriales;f__Coleofasciculaceae;g__Allocoleopsis;s__Unclassified	METABOLISM	C	Energy production and conversion	324
MAG15	d__Bacteria;p__Cyanobacteriota;c__Cyanobacteriia;o__Cyanobacteriales;f__Coleofasciculaceae;g__Allocoleopsis;s__Unclassified	METABOLISM	E	Amino acid transport and metabolism	257
MAG15	d__Bacteria;p__Cyanobacteriota;c__Cyanobacteriia;o__Cyanobacteriales;f__Coleofasciculaceae;g__Allocoleopsis;s__Unclassified	METABOLISM	F	Nucleotide transport and metabolism	95
MAG15	d__Bacteria;p__Cyanobacteriota;c__Cyanobacteriia;o__Cyanobacteriales;f__Coleofasciculaceae;g__Allocoleopsis;s__Unclassified	METABOLISM	G	Carbohydrate transport and metabolism	234
MAG15	d__Bacteria;p__Cyanobacteriota;c__Cyanobacteriia;o__Cyanobacteriales;f__Coleofasciculaceae;g__Allocoleopsis;s__Unclassified	METABOLISM	H	Coenzyme transport and metabolism	277
MAG15	d__Bacteria;p__Cyanobacteriota;c__Cyanobacteriia;o__Cyanobacteriales;f__Coleofasciculaceae;g__Allocoleopsis;s__Unclassified	METABOLISM	I	Lipid transport and metabolism	127
MAG15	d__Bacteria;p__Cyanobacteriota;c__Cyanobacteriia;o__Cyanobacteriales;f__Coleofasciculaceae;g__Allocoleopsis;s__Unclassified	METABOLISM	P	Inorganic ion transport and metabolism	236
MAG15	d__Bacteria;p__Cyanobacteriota;c__Cyanobacteriia;o__Cyanobacteriales;f__Coleofasciculaceae;g__Allocoleopsis;s__Unclassified	METABOLISM	Q	Secondary metabolites biosynthesis, transport and catabolism	115
MAG15	d__Bacteria;p__Cyanobacteriota;c__Cyanobacteriia;o__Cyanobacteriales;f__Coleofasciculaceae;g__Allocoleopsis;s__Unclassified	POORLY CHARACTERIZED	R	General function prediction only	549
MAG15	d__Bacteria;p__Cyanobacteriota;c__Cyanobacteriia;o__Cyanobacteriales;f__Coleofasciculaceae;g__Allocoleopsis;s__Unclassified	POORLY CHARACTERIZED	S	Function unknown	238
MAG151	d__Bacteria;p__Actinomycetota;c__Thermoleophilia;o__Solirubrobacterales;f__Solirubrobacteraceae;g__Palsa-465;s__Unclassified	CELLULAR PROCESSES AND SIGNALING	D	Cell cycle control, cell division, chromosome partitioning	40
MAG151	d__Bacteria;p__Actinomycetota;c__Thermoleophilia;o__Solirubrobacterales;f__Solirubrobacteraceae;g__Palsa-465;s__Unclassified	CELLULAR PROCESSES AND SIGNALING	M	Cell wall/membrane/envelope biogenesis	271
MAG151	d__Bacteria;p__Actinomycetota;c__Thermoleophilia;o__Solirubrobacterales;f__Solirubrobacteraceae;g__Palsa-465;s__Unclassified	CELLULAR PROCESSES AND SIGNALING	N	Cell motility	54
MAG151	d__Bacteria;p__Actinomycetota;c__Thermoleophilia;o__Solirubrobacterales;f__Solirubrobacteraceae;g__Palsa-465;s__Unclassified	CELLULAR PROCESSES AND SIGNALING	O	Posttranslational modification, protein turnover, chaperones	181
MAG151	d__Bacteria;p__Actinomycetota;c__Thermoleophilia;o__Solirubrobacterales;f__Solirubrobacteraceae;g__Palsa-465;s__Unclassified	CELLULAR PROCESSES AND SIGNALING	T	Signal transduction mechanisms	330
MAG151	d__Bacteria;p__Actinomycetota;c__Thermoleophilia;o__Solirubrobacterales;f__Solirubrobacteraceae;g__Palsa-465;s__Unclassified	CELLULAR PROCESSES AND SIGNALING	U	Intracellular trafficking, secretion, and vesicular transport	33
MAG151	d__Bacteria;p__Actinomycetota;c__Thermoleophilia;o__Solirubrobacterales;f__Solirubrobacteraceae;g__Palsa-465;s__Unclassified	CELLULAR PROCESSES AND SIGNALING	V	Defense mechanisms	86
MAG151	d__Bacteria;p__Actinomycetota;c__Thermoleophilia;o__Solirubrobacterales;f__Solirubrobacteraceae;g__Palsa-465;s__Unclassified	CELLULAR PROCESSES AND SIGNALING	W	Extracellular structures	12
MAG151	d__Bacteria;p__Actinomycetota;c__Thermoleophilia;o__Solirubrobacterales;f__Solirubrobacteraceae;g__Palsa-465;s__Unclassified	CELLULAR PROCESSES AND SIGNALING	X	Mobilome: prophages, transposons	41
MAG151	d__Bacteria;p__Actinomycetota;c__Thermoleophilia;o__Solirubrobacterales;f__Solirubrobacteraceae;g__Palsa-465;s__Unclassified	CELLULAR PROCESSES AND SIGNALING	Z	Cytoskeleton	2
MAG151	d__Bacteria;p__Actinomycetota;c__Thermoleophilia;o__Solirubrobacterales;f__Solirubrobacteraceae;g__Palsa-465;s__Unclassified	INFORMATION STORAGE AND PROCESSING	J	Translation, ribosomal structure and biogenesis	214
MAG151	d__Bacteria;p__Actinomycetota;c__Thermoleophilia;o__Solirubrobacterales;f__Solirubrobacteraceae;g__Palsa-465;s__Unclassified	INFORMATION STORAGE AND PROCESSING	K	Transcription	425
MAG151	d__Bacteria;p__Actinomycetota;c__Thermoleophilia;o__Solirubrobacterales;f__Solirubrobacteraceae;g__Palsa-465;s__Unclassified	INFORMATION STORAGE AND PROCESSING	L	Replication, recombination and repair	150
MAG151	d__Bacteria;p__Actinomycetota;c__Thermoleophilia;o__Solirubrobacterales;f__Solirubrobacteraceae;g__Palsa-465;s__Unclassified	METABOLISM	C	Energy production and conversion	309
MAG151	d__Bacteria;p__Actinomycetota;c__Thermoleophilia;o__Solirubrobacterales;f__Solirubrobacteraceae;g__Palsa-465;s__Unclassified	METABOLISM	E	Amino acid transport and metabolism	507
MAG151	d__Bacteria;p__Actinomycetota;c__Thermoleophilia;o__Solirubrobacterales;f__Solirubrobacteraceae;g__Palsa-465;s__Unclassified	METABOLISM	F	Nucleotide transport and metabolism	109
MAG151	d__Bacteria;p__Actinomycetota;c__Thermoleophilia;o__Solirubrobacterales;f__Solirubrobacteraceae;g__Palsa-465;s__Unclassified	METABOLISM	G	Carbohydrate transport and metabolism	306
MAG151	d__Bacteria;p__Actinomycetota;c__Thermoleophilia;o__Solirubrobacterales;f__Solirubrobacteraceae;g__Palsa-465;s__Unclassified	METABOLISM	H	Coenzyme transport and metabolism	314
MAG151	d__Bacteria;p__Actinomycetota;c__Thermoleophilia;o__Solirubrobacterales;f__Solirubrobacteraceae;g__Palsa-465;s__Unclassified	METABOLISM	I	Lipid transport and metabolism	343
MAG151	d__Bacteria;p__Actinomycetota;c__Thermoleophilia;o__Solirubrobacterales;f__Solirubrobacteraceae;g__Palsa-465;s__Unclassified	METABOLISM	P	Inorganic ion transport and metabolism	198
MAG151	d__Bacteria;p__Actinomycetota;c__Thermoleophilia;o__Solirubrobacterales;f__Solirubrobacteraceae;g__Palsa-465;s__Unclassified	METABOLISM	Q	Secondary metabolites biosynthesis, transport and catabolism	136
MAG151	d__Bacteria;p__Actinomycetota;c__Thermoleophilia;o__Solirubrobacterales;f__Solirubrobacteraceae;g__Palsa-465;s__Unclassified	POORLY CHARACTERIZED	R	General function prediction only	418
MAG151	d__Bacteria;p__Actinomycetota;c__Thermoleophilia;o__Solirubrobacterales;f__Solirubrobacteraceae;g__Palsa-465;s__Unclassified	POORLY CHARACTERIZED	S	Function unknown	121
MAG154	d__Bacteria;p__Pseudomonadota;c__Alphaproteobacteria;o__Rhizobiales;f__Xanthobacteraceae;g__Bradyrhizobium;s__Unclassified	CELLULAR PROCESSES AND SIGNALING	D	Cell cycle control, cell division, chromosome partitioning	50
MAG154	d__Bacteria;p__Pseudomonadota;c__Alphaproteobacteria;o__Rhizobiales;f__Xanthobacteraceae;g__Bradyrhizobium;s__Unclassified	CELLULAR PROCESSES AND SIGNALING	M	Cell wall/membrane/envelope biogenesis	301
MAG154	d__Bacteria;p__Pseudomonadota;c__Alphaproteobacteria;o__Rhizobiales;f__Xanthobacteraceae;g__Bradyrhizobium;s__Unclassified	CELLULAR PROCESSES AND SIGNALING	N	Cell motility	50
MAG154	d__Bacteria;p__Pseudomonadota;c__Alphaproteobacteria;o__Rhizobiales;f__Xanthobacteraceae;g__Bradyrhizobium;s__Unclassified	CELLULAR PROCESSES AND SIGNALING	O	Posttranslational modification, protein turnover, chaperones	237
MAG154	d__Bacteria;p__Pseudomonadota;c__Alphaproteobacteria;o__Rhizobiales;f__Xanthobacteraceae;g__Bradyrhizobium;s__Unclassified	CELLULAR PROCESSES AND SIGNALING	T	Signal transduction mechanisms	299
MAG154	d__Bacteria;p__Pseudomonadota;c__Alphaproteobacteria;o__Rhizobiales;f__Xanthobacteraceae;g__Bradyrhizobium;s__Unclassified	CELLULAR PROCESSES AND SIGNALING	U	Intracellular trafficking, secretion, and vesicular transport	78
MAG154	d__Bacteria;p__Pseudomonadota;c__Alphaproteobacteria;o__Rhizobiales;f__Xanthobacteraceae;g__Bradyrhizobium;s__Unclassified	CELLULAR PROCESSES AND SIGNALING	V	Defense mechanisms	99
MAG154	d__Bacteria;p__Pseudomonadota;c__Alphaproteobacteria;o__Rhizobiales;f__Xanthobacteraceae;g__Bradyrhizobium;s__Unclassified	CELLULAR PROCESSES AND SIGNALING	W	Extracellular structures	43
MAG154	d__Bacteria;p__Pseudomonadota;c__Alphaproteobacteria;o__Rhizobiales;f__Xanthobacteraceae;g__Bradyrhizobium;s__Unclassified	CELLULAR PROCESSES AND SIGNALING	X	Mobilome: prophages, transposons	52
MAG154	d__Bacteria;p__Pseudomonadota;c__Alphaproteobacteria;o__Rhizobiales;f__Xanthobacteraceae;g__Bradyrhizobium;s__Unclassified	CELLULAR PROCESSES AND SIGNALING	Z	Cytoskeleton	1
MAG154	d__Bacteria;p__Pseudomonadota;c__Alphaproteobacteria;o__Rhizobiales;f__Xanthobacteraceae;g__Bradyrhizobium;s__Unclassified	INFORMATION STORAGE AND PROCESSING	J	Translation, ribosomal structure and biogenesis	194
MAG154	d__Bacteria;p__Pseudomonadota;c__Alphaproteobacteria;o__Rhizobiales;f__Xanthobacteraceae;g__Bradyrhizobium;s__Unclassified	INFORMATION STORAGE AND PROCESSING	K	Transcription	202
MAG154	d__Bacteria;p__Pseudomonadota;c__Alphaproteobacteria;o__Rhizobiales;f__Xanthobacteraceae;g__Bradyrhizobium;s__Unclassified	INFORMATION STORAGE AND PROCESSING	L	Replication, recombination and repair	141
MAG154	d__Bacteria;p__Pseudomonadota;c__Alphaproteobacteria;o__Rhizobiales;f__Xanthobacteraceae;g__Bradyrhizobium;s__Unclassified	METABOLISM	C	Energy production and conversion	306
MAG154	d__Bacteria;p__Pseudomonadota;c__Alphaproteobacteria;o__Rhizobiales;f__Xanthobacteraceae;g__Bradyrhizobium;s__Unclassified	METABOLISM	E	Amino acid transport and metabolism	436
MAG154	d__Bacteria;p__Pseudomonadota;c__Alphaproteobacteria;o__Rhizobiales;f__Xanthobacteraceae;g__Bradyrhizobium;s__Unclassified	METABOLISM	F	Nucleotide transport and metabolism	79
MAG154	d__Bacteria;p__Pseudomonadota;c__Alphaproteobacteria;o__Rhizobiales;f__Xanthobacteraceae;g__Bradyrhizobium;s__Unclassified	METABOLISM	G	Carbohydrate transport and metabolism	280
MAG154	d__Bacteria;p__Pseudomonadota;c__Alphaproteobacteria;o__Rhizobiales;f__Xanthobacteraceae;g__Bradyrhizobium;s__Unclassified	METABOLISM	H	Coenzyme transport and metabolism	226
MAG154	d__Bacteria;p__Pseudomonadota;c__Alphaproteobacteria;o__Rhizobiales;f__Xanthobacteraceae;g__Bradyrhizobium;s__Unclassified	METABOLISM	I	Lipid transport and metabolism	297
MAG154	d__Bacteria;p__Pseudomonadota;c__Alphaproteobacteria;o__Rhizobiales;f__Xanthobacteraceae;g__Bradyrhizobium;s__Unclassified	METABOLISM	P	Inorganic ion transport and metabolism	246
MAG154	d__Bacteria;p__Pseudomonadota;c__Alphaproteobacteria;o__Rhizobiales;f__Xanthobacteraceae;g__Bradyrhizobium;s__Unclassified	METABOLISM	Q	Secondary metabolites biosynthesis, transport and catabolism	97
MAG154	d__Bacteria;p__Pseudomonadota;c__Alphaproteobacteria;o__Rhizobiales;f__Xanthobacteraceae;g__Bradyrhizobium;s__Unclassified	POORLY CHARACTERIZED	R	General function prediction only	363
MAG154	d__Bacteria;p__Pseudomonadota;c__Alphaproteobacteria;o__Rhizobiales;f__Xanthobacteraceae;g__Bradyrhizobium;s__Unclassified	POORLY CHARACTERIZED	S	Function unknown	205
MAG155	d__Bacteria;p__Actinomycetota;c__Actinomycetia;o__Mycobacteriales;f__Mycobacteriaceae;g__Corynebacterium;s__Corynebacterium sp945649885	CELLULAR PROCESSES AND SIGNALING	D	Cell cycle control, cell division, chromosome partitioning	28
MAG155	d__Bacteria;p__Actinomycetota;c__Actinomycetia;o__Mycobacteriales;f__Mycobacteriaceae;g__Corynebacterium;s__Corynebacterium sp945649885	CELLULAR PROCESSES AND SIGNALING	M	Cell wall/membrane/envelope biogenesis	119
MAG155	d__Bacteria;p__Actinomycetota;c__Actinomycetia;o__Mycobacteriales;f__Mycobacteriaceae;g__Corynebacterium;s__Corynebacterium sp945649885	CELLULAR PROCESSES AND SIGNALING	N	Cell motility	7
MAG155	d__Bacteria;p__Actinomycetota;c__Actinomycetia;o__Mycobacteriales;f__Mycobacteriaceae;g__Corynebacterium;s__Corynebacterium sp945649885	CELLULAR PROCESSES AND SIGNALING	O	Posttranslational modification, protein turnover, chaperones	106
MAG155	d__Bacteria;p__Actinomycetota;c__Actinomycetia;o__Mycobacteriales;f__Mycobacteriaceae;g__Corynebacterium;s__Corynebacterium sp945649885	CELLULAR PROCESSES AND SIGNALING	T	Signal transduction mechanisms	90
MAG155	d__Bacteria;p__Actinomycetota;c__Actinomycetia;o__Mycobacteriales;f__Mycobacteriaceae;g__Corynebacterium;s__Corynebacterium sp945649885	CELLULAR PROCESSES AND SIGNALING	U	Intracellular trafficking, secretion, and vesicular transport	24
MAG155	d__Bacteria;p__Actinomycetota;c__Actinomycetia;o__Mycobacteriales;f__Mycobacteriaceae;g__Corynebacterium;s__Corynebacterium sp945649885	CELLULAR PROCESSES AND SIGNALING	V	Defense mechanisms	81
MAG155	d__Bacteria;p__Actinomycetota;c__Actinomycetia;o__Mycobacteriales;f__Mycobacteriaceae;g__Corynebacterium;s__Corynebacterium sp945649885	CELLULAR PROCESSES AND SIGNALING	W	Extracellular structures	6
MAG155	d__Bacteria;p__Actinomycetota;c__Actinomycetia;o__Mycobacteriales;f__Mycobacteriaceae;g__Corynebacterium;s__Corynebacterium sp945649885	CELLULAR PROCESSES AND SIGNALING	X	Mobilome: prophages, transposons	35
MAG155	d__Bacteria;p__Actinomycetota;c__Actinomycetia;o__Mycobacteriales;f__Mycobacteriaceae;g__Corynebacterium;s__Corynebacterium sp945649885	INFORMATION STORAGE AND PROCESSING	A	RNA processing and modification	2
MAG155	d__Bacteria;p__Actinomycetota;c__Actinomycetia;o__Mycobacteriales;f__Mycobacteriaceae;g__Corynebacterium;s__Corynebacterium sp945649885	INFORMATION STORAGE AND PROCESSING	J	Translation, ribosomal structure and biogenesis	196
MAG155	d__Bacteria;p__Actinomycetota;c__Actinomycetia;o__Mycobacteriales;f__Mycobacteriaceae;g__Corynebacterium;s__Corynebacterium sp945649885	INFORMATION STORAGE AND PROCESSING	K	Transcription	200
MAG155	d__Bacteria;p__Actinomycetota;c__Actinomycetia;o__Mycobacteriales;f__Mycobacteriaceae;g__Corynebacterium;s__Corynebacterium sp945649885	INFORMATION STORAGE AND PROCESSING	L	Replication, recombination and repair	138
MAG155	d__Bacteria;p__Actinomycetota;c__Actinomycetia;o__Mycobacteriales;f__Mycobacteriaceae;g__Corynebacterium;s__Corynebacterium sp945649885	METABOLISM	C	Energy production and conversion	130
MAG155	d__Bacteria;p__Actinomycetota;c__Actinomycetia;o__Mycobacteriales;f__Mycobacteriaceae;g__Corynebacterium;s__Corynebacterium sp945649885	METABOLISM	E	Amino acid transport and metabolism	213
MAG155	d__Bacteria;p__Actinomycetota;c__Actinomycetia;o__Mycobacteriales;f__Mycobacteriaceae;g__Corynebacterium;s__Corynebacterium sp945649885	METABOLISM	F	Nucleotide transport and metabolism	86
MAG155	d__Bacteria;p__Actinomycetota;c__Actinomycetia;o__Mycobacteriales;f__Mycobacteriaceae;g__Corynebacterium;s__Corynebacterium sp945649885	METABOLISM	G	Carbohydrate transport and metabolism	193
MAG155	d__Bacteria;p__Actinomycetota;c__Actinomycetia;o__Mycobacteriales;f__Mycobacteriaceae;g__Corynebacterium;s__Corynebacterium sp945649885	METABOLISM	H	Coenzyme transport and metabolism	189
MAG155	d__Bacteria;p__Actinomycetota;c__Actinomycetia;o__Mycobacteriales;f__Mycobacteriaceae;g__Corynebacterium;s__Corynebacterium sp945649885	METABOLISM	I	Lipid transport and metabolism	140
MAG155	d__Bacteria;p__Actinomycetota;c__Actinomycetia;o__Mycobacteriales;f__Mycobacteriaceae;g__Corynebacterium;s__Corynebacterium sp945649885	METABOLISM	P	Inorganic ion transport and metabolism	165
MAG155	d__Bacteria;p__Actinomycetota;c__Actinomycetia;o__Mycobacteriales;f__Mycobacteriaceae;g__Corynebacterium;s__Corynebacterium sp945649885	METABOLISM	Q	Secondary metabolites biosynthesis, transport and catabolism	57
MAG155	d__Bacteria;p__Actinomycetota;c__Actinomycetia;o__Mycobacteriales;f__Mycobacteriaceae;g__Corynebacterium;s__Corynebacterium sp945649885	POORLY CHARACTERIZED	R	General function prediction only	203
MAG155	d__Bacteria;p__Actinomycetota;c__Actinomycetia;o__Mycobacteriales;f__Mycobacteriaceae;g__Corynebacterium;s__Corynebacterium sp945649885	POORLY CHARACTERIZED	S	Function unknown	80
MAG157	d__Bacteria;p__Pseudomonadota;c__Alphaproteobacteria;o__Sphingomonadales;f__Sphingomonadaceae;g__Sphingomicrobium;s__Unclassified	CELLULAR PROCESSES AND SIGNALING	D	Cell cycle control, cell division, chromosome partitioning	31
MAG157	d__Bacteria;p__Pseudomonadota;c__Alphaproteobacteria;o__Sphingomonadales;f__Sphingomonadaceae;g__Sphingomicrobium;s__Unclassified	CELLULAR PROCESSES AND SIGNALING	M	Cell wall/membrane/envelope biogenesis	184
MAG157	d__Bacteria;p__Pseudomonadota;c__Alphaproteobacteria;o__Sphingomonadales;f__Sphingomonadaceae;g__Sphingomicrobium;s__Unclassified	CELLULAR PROCESSES AND SIGNALING	N	Cell motility	13
MAG157	d__Bacteria;p__Pseudomonadota;c__Alphaproteobacteria;o__Sphingomonadales;f__Sphingomonadaceae;g__Sphingomicrobium;s__Unclassified	CELLULAR PROCESSES AND SIGNALING	O	Posttranslational modification, protein turnover, chaperones	150
MAG157	d__Bacteria;p__Pseudomonadota;c__Alphaproteobacteria;o__Sphingomonadales;f__Sphingomonadaceae;g__Sphingomicrobium;s__Unclassified	CELLULAR PROCESSES AND SIGNALING	T	Signal transduction mechanisms	115
MAG157	d__Bacteria;p__Pseudomonadota;c__Alphaproteobacteria;o__Sphingomonadales;f__Sphingomonadaceae;g__Sphingomicrobium;s__Unclassified	CELLULAR PROCESSES AND SIGNALING	U	Intracellular trafficking, secretion, and vesicular transport	48
MAG157	d__Bacteria;p__Pseudomonadota;c__Alphaproteobacteria;o__Sphingomonadales;f__Sphingomonadaceae;g__Sphingomicrobium;s__Unclassified	CELLULAR PROCESSES AND SIGNALING	V	Defense mechanisms	35
MAG157	d__Bacteria;p__Pseudomonadota;c__Alphaproteobacteria;o__Sphingomonadales;f__Sphingomonadaceae;g__Sphingomicrobium;s__Unclassified	CELLULAR PROCESSES AND SIGNALING	W	Extracellular structures	24
MAG157	d__Bacteria;p__Pseudomonadota;c__Alphaproteobacteria;o__Sphingomonadales;f__Sphingomonadaceae;g__Sphingomicrobium;s__Unclassified	CELLULAR PROCESSES AND SIGNALING	X	Mobilome: prophages, transposons	8
MAG157	d__Bacteria;p__Pseudomonadota;c__Alphaproteobacteria;o__Sphingomonadales;f__Sphingomonadaceae;g__Sphingomicrobium;s__Unclassified	CELLULAR PROCESSES AND SIGNALING	Z	Cytoskeleton	2
MAG157	d__Bacteria;p__Pseudomonadota;c__Alphaproteobacteria;o__Sphingomonadales;f__Sphingomonadaceae;g__Sphingomicrobium;s__Unclassified	INFORMATION STORAGE AND PROCESSING	B	Chromatin structure and dynamics	1
MAG157	d__Bacteria;p__Pseudomonadota;c__Alphaproteobacteria;o__Sphingomonadales;f__Sphingomonadaceae;g__Sphingomicrobium;s__Unclassified	INFORMATION STORAGE AND PROCESSING	J	Translation, ribosomal structure and biogenesis	153
MAG157	d__Bacteria;p__Pseudomonadota;c__Alphaproteobacteria;o__Sphingomonadales;f__Sphingomonadaceae;g__Sphingomicrobium;s__Unclassified	INFORMATION STORAGE AND PROCESSING	K	Transcription	102
MAG157	d__Bacteria;p__Pseudomonadota;c__Alphaproteobacteria;o__Sphingomonadales;f__Sphingomonadaceae;g__Sphingomicrobium;s__Unclassified	INFORMATION STORAGE AND PROCESSING	L	Replication, recombination and repair	115
MAG157	d__Bacteria;p__Pseudomonadota;c__Alphaproteobacteria;o__Sphingomonadales;f__Sphingomonadaceae;g__Sphingomicrobium;s__Unclassified	METABOLISM	C	Energy production and conversion	109
MAG157	d__Bacteria;p__Pseudomonadota;c__Alphaproteobacteria;o__Sphingomonadales;f__Sphingomonadaceae;g__Sphingomicrobium;s__Unclassified	METABOLISM	E	Amino acid transport and metabolism	193
MAG157	d__Bacteria;p__Pseudomonadota;c__Alphaproteobacteria;o__Sphingomonadales;f__Sphingomonadaceae;g__Sphingomicrobium;s__Unclassified	METABOLISM	F	Nucleotide transport and metabolism	55
MAG157	d__Bacteria;p__Pseudomonadota;c__Alphaproteobacteria;o__Sphingomonadales;f__Sphingomonadaceae;g__Sphingomicrobium;s__Unclassified	METABOLISM	G	Carbohydrate transport and metabolism	129
MAG157	d__Bacteria;p__Pseudomonadota;c__Alphaproteobacteria;o__Sphingomonadales;f__Sphingomonadaceae;g__Sphingomicrobium;s__Unclassified	METABOLISM	H	Coenzyme transport and metabolism	121
MAG157	d__Bacteria;p__Pseudomonadota;c__Alphaproteobacteria;o__Sphingomonadales;f__Sphingomonadaceae;g__Sphingomicrobium;s__Unclassified	METABOLISM	I	Lipid transport and metabolism	111
MAG157	d__Bacteria;p__Pseudomonadota;c__Alphaproteobacteria;o__Sphingomonadales;f__Sphingomonadaceae;g__Sphingomicrobium;s__Unclassified	METABOLISM	P	Inorganic ion transport and metabolism	98
MAG157	d__Bacteria;p__Pseudomonadota;c__Alphaproteobacteria;o__Sphingomonadales;f__Sphingomonadaceae;g__Sphingomicrobium;s__Unclassified	METABOLISM	Q	Secondary metabolites biosynthesis, transport and catabolism	37
MAG157	d__Bacteria;p__Pseudomonadota;c__Alphaproteobacteria;o__Sphingomonadales;f__Sphingomonadaceae;g__Sphingomicrobium;s__Unclassified	POORLY CHARACTERIZED	R	General function prediction only	149
MAG157	d__Bacteria;p__Pseudomonadota;c__Alphaproteobacteria;o__Sphingomonadales;f__Sphingomonadaceae;g__Sphingomicrobium;s__Unclassified	POORLY CHARACTERIZED	S	Function unknown	97
MAG160	d__Bacteria;p__Actinomycetota;c__Actinomycetia;o__Propionibacteriales;f__Nocardioidaceae;g__Marmoricola;s__Unclassified	CELLULAR PROCESSES AND SIGNALING	D	Cell cycle control, cell division, chromosome partitioning	43
MAG160	d__Bacteria;p__Actinomycetota;c__Actinomycetia;o__Propionibacteriales;f__Nocardioidaceae;g__Marmoricola;s__Unclassified	CELLULAR PROCESSES AND SIGNALING	M	Cell wall/membrane/envelope biogenesis	131
MAG160	d__Bacteria;p__Actinomycetota;c__Actinomycetia;o__Propionibacteriales;f__Nocardioidaceae;g__Marmoricola;s__Unclassified	CELLULAR PROCESSES AND SIGNALING	N	Cell motility	9
MAG160	d__Bacteria;p__Actinomycetota;c__Actinomycetia;o__Propionibacteriales;f__Nocardioidaceae;g__Marmoricola;s__Unclassified	CELLULAR PROCESSES AND SIGNALING	O	Posttranslational modification, protein turnover, chaperones	130
MAG160	d__Bacteria;p__Actinomycetota;c__Actinomycetia;o__Propionibacteriales;f__Nocardioidaceae;g__Marmoricola;s__Unclassified	CELLULAR PROCESSES AND SIGNALING	T	Signal transduction mechanisms	156
MAG160	d__Bacteria;p__Actinomycetota;c__Actinomycetia;o__Propionibacteriales;f__Nocardioidaceae;g__Marmoricola;s__Unclassified	CELLULAR PROCESSES AND SIGNALING	U	Intracellular trafficking, secretion, and vesicular transport	30
MAG160	d__Bacteria;p__Actinomycetota;c__Actinomycetia;o__Propionibacteriales;f__Nocardioidaceae;g__Marmoricola;s__Unclassified	CELLULAR PROCESSES AND SIGNALING	V	Defense mechanisms	63
MAG160	d__Bacteria;p__Actinomycetota;c__Actinomycetia;o__Propionibacteriales;f__Nocardioidaceae;g__Marmoricola;s__Unclassified	CELLULAR PROCESSES AND SIGNALING	W	Extracellular structures	16
MAG160	d__Bacteria;p__Actinomycetota;c__Actinomycetia;o__Propionibacteriales;f__Nocardioidaceae;g__Marmoricola;s__Unclassified	CELLULAR PROCESSES AND SIGNALING	X	Mobilome: prophages, transposons	9
MAG160	d__Bacteria;p__Actinomycetota;c__Actinomycetia;o__Propionibacteriales;f__Nocardioidaceae;g__Marmoricola;s__Unclassified	CELLULAR PROCESSES AND SIGNALING	Z	Cytoskeleton	2
MAG160	d__Bacteria;p__Actinomycetota;c__Actinomycetia;o__Propionibacteriales;f__Nocardioidaceae;g__Marmoricola;s__Unclassified	INFORMATION STORAGE AND PROCESSING	A	RNA processing and modification	1
MAG160	d__Bacteria;p__Actinomycetota;c__Actinomycetia;o__Propionibacteriales;f__Nocardioidaceae;g__Marmoricola;s__Unclassified	INFORMATION STORAGE AND PROCESSING	J	Translation, ribosomal structure and biogenesis	175
MAG160	d__Bacteria;p__Actinomycetota;c__Actinomycetia;o__Propionibacteriales;f__Nocardioidaceae;g__Marmoricola;s__Unclassified	INFORMATION STORAGE AND PROCESSING	K	Transcription	198
MAG160	d__Bacteria;p__Actinomycetota;c__Actinomycetia;o__Propionibacteriales;f__Nocardioidaceae;g__Marmoricola;s__Unclassified	INFORMATION STORAGE AND PROCESSING	L	Replication, recombination and repair	102
MAG160	d__Bacteria;p__Actinomycetota;c__Actinomycetia;o__Propionibacteriales;f__Nocardioidaceae;g__Marmoricola;s__Unclassified	METABOLISM	C	Energy production and conversion	178
MAG160	d__Bacteria;p__Actinomycetota;c__Actinomycetia;o__Propionibacteriales;f__Nocardioidaceae;g__Marmoricola;s__Unclassified	METABOLISM	E	Amino acid transport and metabolism	254
MAG160	d__Bacteria;p__Actinomycetota;c__Actinomycetia;o__Propionibacteriales;f__Nocardioidaceae;g__Marmoricola;s__Unclassified	METABOLISM	F	Nucleotide transport and metabolism	80
MAG160	d__Bacteria;p__Actinomycetota;c__Actinomycetia;o__Propionibacteriales;f__Nocardioidaceae;g__Marmoricola;s__Unclassified	METABOLISM	G	Carbohydrate transport and metabolism	163
MAG160	d__Bacteria;p__Actinomycetota;c__Actinomycetia;o__Propionibacteriales;f__Nocardioidaceae;g__Marmoricola;s__Unclassified	METABOLISM	H	Coenzyme transport and metabolism	172
MAG160	d__Bacteria;p__Actinomycetota;c__Actinomycetia;o__Propionibacteriales;f__Nocardioidaceae;g__Marmoricola;s__Unclassified	METABOLISM	I	Lipid transport and metabolism	210
MAG160	d__Bacteria;p__Actinomycetota;c__Actinomycetia;o__Propionibacteriales;f__Nocardioidaceae;g__Marmoricola;s__Unclassified	METABOLISM	P	Inorganic ion transport and metabolism	132
MAG160	d__Bacteria;p__Actinomycetota;c__Actinomycetia;o__Propionibacteriales;f__Nocardioidaceae;g__Marmoricola;s__Unclassified	METABOLISM	Q	Secondary metabolites biosynthesis, transport and catabolism	67
MAG160	d__Bacteria;p__Actinomycetota;c__Actinomycetia;o__Propionibacteriales;f__Nocardioidaceae;g__Marmoricola;s__Unclassified	POORLY CHARACTERIZED	R	General function prediction only	262
MAG160	d__Bacteria;p__Actinomycetota;c__Actinomycetia;o__Propionibacteriales;f__Nocardioidaceae;g__Marmoricola;s__Unclassified	POORLY CHARACTERIZED	S	Function unknown	89
MAG161	d__Bacteria;p__Actinomycetota;c__Actinomycetia;o__Actinomycetales;f__Micrococcaceae;g__Glutamicibacter;s__Glutamicibacter arilaitensis	CELLULAR PROCESSES AND SIGNALING	D	Cell cycle control, cell division, chromosome partitioning	34
MAG161	d__Bacteria;p__Actinomycetota;c__Actinomycetia;o__Actinomycetales;f__Micrococcaceae;g__Glutamicibacter;s__Glutamicibacter arilaitensis	CELLULAR PROCESSES AND SIGNALING	M	Cell wall/membrane/envelope biogenesis	103
MAG161	d__Bacteria;p__Actinomycetota;c__Actinomycetia;o__Actinomycetales;f__Micrococcaceae;g__Glutamicibacter;s__Glutamicibacter arilaitensis	CELLULAR PROCESSES AND SIGNALING	N	Cell motility	5
MAG161	d__Bacteria;p__Actinomycetota;c__Actinomycetia;o__Actinomycetales;f__Micrococcaceae;g__Glutamicibacter;s__Glutamicibacter arilaitensis	CELLULAR PROCESSES AND SIGNALING	O	Posttranslational modification, protein turnover, chaperones	129
MAG161	d__Bacteria;p__Actinomycetota;c__Actinomycetia;o__Actinomycetales;f__Micrococcaceae;g__Glutamicibacter;s__Glutamicibacter arilaitensis	CELLULAR PROCESSES AND SIGNALING	T	Signal transduction mechanisms	111
MAG161	d__Bacteria;p__Actinomycetota;c__Actinomycetia;o__Actinomycetales;f__Micrococcaceae;g__Glutamicibacter;s__Glutamicibacter arilaitensis	CELLULAR PROCESSES AND SIGNALING	U	Intracellular trafficking, secretion, and vesicular transport	26
MAG161	d__Bacteria;p__Actinomycetota;c__Actinomycetia;o__Actinomycetales;f__Micrococcaceae;g__Glutamicibacter;s__Glutamicibacter arilaitensis	CELLULAR PROCESSES AND SIGNALING	V	Defense mechanisms	61
MAG161	d__Bacteria;p__Actinomycetota;c__Actinomycetia;o__Actinomycetales;f__Micrococcaceae;g__Glutamicibacter;s__Glutamicibacter arilaitensis	CELLULAR PROCESSES AND SIGNALING	W	Extracellular structures	7
MAG161	d__Bacteria;p__Actinomycetota;c__Actinomycetia;o__Actinomycetales;f__Micrococcaceae;g__Glutamicibacter;s__Glutamicibacter arilaitensis	CELLULAR PROCESSES AND SIGNALING	X	Mobilome: prophages, transposons	9
MAG161	d__Bacteria;p__Actinomycetota;c__Actinomycetia;o__Actinomycetales;f__Micrococcaceae;g__Glutamicibacter;s__Glutamicibacter arilaitensis	INFORMATION STORAGE AND PROCESSING	A	RNA processing and modification	1
MAG161	d__Bacteria;p__Actinomycetota;c__Actinomycetia;o__Actinomycetales;f__Micrococcaceae;g__Glutamicibacter;s__Glutamicibacter arilaitensis	INFORMATION STORAGE AND PROCESSING	J	Translation, ribosomal structure and biogenesis	211
MAG161	d__Bacteria;p__Actinomycetota;c__Actinomycetia;o__Actinomycetales;f__Micrococcaceae;g__Glutamicibacter;s__Glutamicibacter arilaitensis	INFORMATION STORAGE AND PROCESSING	K	Transcription	248
MAG161	d__Bacteria;p__Actinomycetota;c__Actinomycetia;o__Actinomycetales;f__Micrococcaceae;g__Glutamicibacter;s__Glutamicibacter arilaitensis	INFORMATION STORAGE AND PROCESSING	L	Replication, recombination and repair	111
MAG161	d__Bacteria;p__Actinomycetota;c__Actinomycetia;o__Actinomycetales;f__Micrococcaceae;g__Glutamicibacter;s__Glutamicibacter arilaitensis	METABOLISM	C	Energy production and conversion	152
MAG161	d__Bacteria;p__Actinomycetota;c__Actinomycetia;o__Actinomycetales;f__Micrococcaceae;g__Glutamicibacter;s__Glutamicibacter arilaitensis	METABOLISM	E	Amino acid transport and metabolism	263
MAG161	d__Bacteria;p__Actinomycetota;c__Actinomycetia;o__Actinomycetales;f__Micrococcaceae;g__Glutamicibacter;s__Glutamicibacter arilaitensis	METABOLISM	F	Nucleotide transport and metabolism	108
MAG161	d__Bacteria;p__Actinomycetota;c__Actinomycetia;o__Actinomycetales;f__Micrococcaceae;g__Glutamicibacter;s__Glutamicibacter arilaitensis	METABOLISM	G	Carbohydrate transport and metabolism	225
MAG161	d__Bacteria;p__Actinomycetota;c__Actinomycetia;o__Actinomycetales;f__Micrococcaceae;g__Glutamicibacter;s__Glutamicibacter arilaitensis	METABOLISM	H	Coenzyme transport and metabolism	178
MAG161	d__Bacteria;p__Actinomycetota;c__Actinomycetia;o__Actinomycetales;f__Micrococcaceae;g__Glutamicibacter;s__Glutamicibacter arilaitensis	METABOLISM	I	Lipid transport and metabolism	168
MAG161	d__Bacteria;p__Actinomycetota;c__Actinomycetia;o__Actinomycetales;f__Micrococcaceae;g__Glutamicibacter;s__Glutamicibacter arilaitensis	METABOLISM	P	Inorganic ion transport and metabolism	156
MAG161	d__Bacteria;p__Actinomycetota;c__Actinomycetia;o__Actinomycetales;f__Micrococcaceae;g__Glutamicibacter;s__Glutamicibacter arilaitensis	METABOLISM	Q	Secondary metabolites biosynthesis, transport and catabolism	62
MAG161	d__Bacteria;p__Actinomycetota;c__Actinomycetia;o__Actinomycetales;f__Micrococcaceae;g__Glutamicibacter;s__Glutamicibacter arilaitensis	POORLY CHARACTERIZED	R	General function prediction only	224
MAG161	d__Bacteria;p__Actinomycetota;c__Actinomycetia;o__Actinomycetales;f__Micrococcaceae;g__Glutamicibacter;s__Glutamicibacter arilaitensis	POORLY CHARACTERIZED	S	Function unknown	75
MAG162	d__Bacteria;p__Pseudomonadota;c__Gammaproteobacteria;o__Xanthomonadales;f__Rhodanobacteraceae;g__Oleiagrimonas;s__Unclassified	CELLULAR PROCESSES AND SIGNALING	D	Cell cycle control, cell division, chromosome partitioning	40
MAG162	d__Bacteria;p__Pseudomonadota;c__Gammaproteobacteria;o__Xanthomonadales;f__Rhodanobacteraceae;g__Oleiagrimonas;s__Unclassified	CELLULAR PROCESSES AND SIGNALING	M	Cell wall/membrane/envelope biogenesis	165
MAG162	d__Bacteria;p__Pseudomonadota;c__Gammaproteobacteria;o__Xanthomonadales;f__Rhodanobacteraceae;g__Oleiagrimonas;s__Unclassified	CELLULAR PROCESSES AND SIGNALING	N	Cell motility	45
MAG162	d__Bacteria;p__Pseudomonadota;c__Gammaproteobacteria;o__Xanthomonadales;f__Rhodanobacteraceae;g__Oleiagrimonas;s__Unclassified	CELLULAR PROCESSES AND SIGNALING	O	Posttranslational modification, protein turnover, chaperones	129
MAG162	d__Bacteria;p__Pseudomonadota;c__Gammaproteobacteria;o__Xanthomonadales;f__Rhodanobacteraceae;g__Oleiagrimonas;s__Unclassified	CELLULAR PROCESSES AND SIGNALING	T	Signal transduction mechanisms	123
MAG162	d__Bacteria;p__Pseudomonadota;c__Gammaproteobacteria;o__Xanthomonadales;f__Rhodanobacteraceae;g__Oleiagrimonas;s__Unclassified	CELLULAR PROCESSES AND SIGNALING	U	Intracellular trafficking, secretion, and vesicular transport	55
MAG162	d__Bacteria;p__Pseudomonadota;c__Gammaproteobacteria;o__Xanthomonadales;f__Rhodanobacteraceae;g__Oleiagrimonas;s__Unclassified	CELLULAR PROCESSES AND SIGNALING	V	Defense mechanisms	107
MAG162	d__Bacteria;p__Pseudomonadota;c__Gammaproteobacteria;o__Xanthomonadales;f__Rhodanobacteraceae;g__Oleiagrimonas;s__Unclassified	CELLULAR PROCESSES AND SIGNALING	W	Extracellular structures	27
MAG162	d__Bacteria;p__Pseudomonadota;c__Gammaproteobacteria;o__Xanthomonadales;f__Rhodanobacteraceae;g__Oleiagrimonas;s__Unclassified	CELLULAR PROCESSES AND SIGNALING	X	Mobilome: prophages, transposons	21
MAG162	d__Bacteria;p__Pseudomonadota;c__Gammaproteobacteria;o__Xanthomonadales;f__Rhodanobacteraceae;g__Oleiagrimonas;s__Unclassified	CELLULAR PROCESSES AND SIGNALING	Z	Cytoskeleton	4
MAG162	d__Bacteria;p__Pseudomonadota;c__Gammaproteobacteria;o__Xanthomonadales;f__Rhodanobacteraceae;g__Oleiagrimonas;s__Unclassified	INFORMATION STORAGE AND PROCESSING	A	RNA processing and modification	1
MAG162	d__Bacteria;p__Pseudomonadota;c__Gammaproteobacteria;o__Xanthomonadales;f__Rhodanobacteraceae;g__Oleiagrimonas;s__Unclassified	INFORMATION STORAGE AND PROCESSING	J	Translation, ribosomal structure and biogenesis	176
MAG162	d__Bacteria;p__Pseudomonadota;c__Gammaproteobacteria;o__Xanthomonadales;f__Rhodanobacteraceae;g__Oleiagrimonas;s__Unclassified	INFORMATION STORAGE AND PROCESSING	K	Transcription	126
MAG162	d__Bacteria;p__Pseudomonadota;c__Gammaproteobacteria;o__Xanthomonadales;f__Rhodanobacteraceae;g__Oleiagrimonas;s__Unclassified	INFORMATION STORAGE AND PROCESSING	L	Replication, recombination and repair	88
MAG162	d__Bacteria;p__Pseudomonadota;c__Gammaproteobacteria;o__Xanthomonadales;f__Rhodanobacteraceae;g__Oleiagrimonas;s__Unclassified	METABOLISM	C	Energy production and conversion	125
MAG162	d__Bacteria;p__Pseudomonadota;c__Gammaproteobacteria;o__Xanthomonadales;f__Rhodanobacteraceae;g__Oleiagrimonas;s__Unclassified	METABOLISM	E	Amino acid transport and metabolism	200
MAG162	d__Bacteria;p__Pseudomonadota;c__Gammaproteobacteria;o__Xanthomonadales;f__Rhodanobacteraceae;g__Oleiagrimonas;s__Unclassified	METABOLISM	F	Nucleotide transport and metabolism	55
MAG162	d__Bacteria;p__Pseudomonadota;c__Gammaproteobacteria;o__Xanthomonadales;f__Rhodanobacteraceae;g__Oleiagrimonas;s__Unclassified	METABOLISM	G	Carbohydrate transport and metabolism	110
MAG162	d__Bacteria;p__Pseudomonadota;c__Gammaproteobacteria;o__Xanthomonadales;f__Rhodanobacteraceae;g__Oleiagrimonas;s__Unclassified	METABOLISM	H	Coenzyme transport and metabolism	108
MAG162	d__Bacteria;p__Pseudomonadota;c__Gammaproteobacteria;o__Xanthomonadales;f__Rhodanobacteraceae;g__Oleiagrimonas;s__Unclassified	METABOLISM	I	Lipid transport and metabolism	105
MAG162	d__Bacteria;p__Pseudomonadota;c__Gammaproteobacteria;o__Xanthomonadales;f__Rhodanobacteraceae;g__Oleiagrimonas;s__Unclassified	METABOLISM	P	Inorganic ion transport and metabolism	88
MAG162	d__Bacteria;p__Pseudomonadota;c__Gammaproteobacteria;o__Xanthomonadales;f__Rhodanobacteraceae;g__Oleiagrimonas;s__Unclassified	METABOLISM	Q	Secondary metabolites biosynthesis, transport and catabolism	25
MAG162	d__Bacteria;p__Pseudomonadota;c__Gammaproteobacteria;o__Xanthomonadales;f__Rhodanobacteraceae;g__Oleiagrimonas;s__Unclassified	POORLY CHARACTERIZED	R	General function prediction only	134
MAG162	d__Bacteria;p__Pseudomonadota;c__Gammaproteobacteria;o__Xanthomonadales;f__Rhodanobacteraceae;g__Oleiagrimonas;s__Unclassified	POORLY CHARACTERIZED	S	Function unknown	75
MAG163	d__Bacteria;p__Chloroflexota;c__Chloroflexia;o__Thermomicrobiales;f__CADCWN01;g__CADCWN01;s__Unclassified	CELLULAR PROCESSES AND SIGNALING	D	Cell cycle control, cell division, chromosome partitioning	54
MAG163	d__Bacteria;p__Chloroflexota;c__Chloroflexia;o__Thermomicrobiales;f__CADCWN01;g__CADCWN01;s__Unclassified	CELLULAR PROCESSES AND SIGNALING	M	Cell wall/membrane/envelope biogenesis	321
MAG163	d__Bacteria;p__Chloroflexota;c__Chloroflexia;o__Thermomicrobiales;f__CADCWN01;g__CADCWN01;s__Unclassified	CELLULAR PROCESSES AND SIGNALING	N	Cell motility	14
MAG163	d__Bacteria;p__Chloroflexota;c__Chloroflexia;o__Thermomicrobiales;f__CADCWN01;g__CADCWN01;s__Unclassified	CELLULAR PROCESSES AND SIGNALING	O	Posttranslational modification, protein turnover, chaperones	167
MAG163	d__Bacteria;p__Chloroflexota;c__Chloroflexia;o__Thermomicrobiales;f__CADCWN01;g__CADCWN01;s__Unclassified	CELLULAR PROCESSES AND SIGNALING	T	Signal transduction mechanisms	268
MAG163	d__Bacteria;p__Chloroflexota;c__Chloroflexia;o__Thermomicrobiales;f__CADCWN01;g__CADCWN01;s__Unclassified	CELLULAR PROCESSES AND SIGNALING	U	Intracellular trafficking, secretion, and vesicular transport	34
MAG163	d__Bacteria;p__Chloroflexota;c__Chloroflexia;o__Thermomicrobiales;f__CADCWN01;g__CADCWN01;s__Unclassified	CELLULAR PROCESSES AND SIGNALING	V	Defense mechanisms	117
MAG163	d__Bacteria;p__Chloroflexota;c__Chloroflexia;o__Thermomicrobiales;f__CADCWN01;g__CADCWN01;s__Unclassified	CELLULAR PROCESSES AND SIGNALING	W	Extracellular structures	9
MAG163	d__Bacteria;p__Chloroflexota;c__Chloroflexia;o__Thermomicrobiales;f__CADCWN01;g__CADCWN01;s__Unclassified	CELLULAR PROCESSES AND SIGNALING	X	Mobilome: prophages, transposons	26
MAG163	d__Bacteria;p__Chloroflexota;c__Chloroflexia;o__Thermomicrobiales;f__CADCWN01;g__CADCWN01;s__Unclassified	CELLULAR PROCESSES AND SIGNALING	Z	Cytoskeleton	8
MAG163	d__Bacteria;p__Chloroflexota;c__Chloroflexia;o__Thermomicrobiales;f__CADCWN01;g__CADCWN01;s__Unclassified	INFORMATION STORAGE AND PROCESSING	J	Translation, ribosomal structure and biogenesis	216
MAG163	d__Bacteria;p__Chloroflexota;c__Chloroflexia;o__Thermomicrobiales;f__CADCWN01;g__CADCWN01;s__Unclassified	INFORMATION STORAGE AND PROCESSING	K	Transcription	246
MAG163	d__Bacteria;p__Chloroflexota;c__Chloroflexia;o__Thermomicrobiales;f__CADCWN01;g__CADCWN01;s__Unclassified	INFORMATION STORAGE AND PROCESSING	L	Replication, recombination and repair	132
MAG163	d__Bacteria;p__Chloroflexota;c__Chloroflexia;o__Thermomicrobiales;f__CADCWN01;g__CADCWN01;s__Unclassified	METABOLISM	C	Energy production and conversion	214
MAG163	d__Bacteria;p__Chloroflexota;c__Chloroflexia;o__Thermomicrobiales;f__CADCWN01;g__CADCWN01;s__Unclassified	METABOLISM	E	Amino acid transport and metabolism	441
MAG163	d__Bacteria;p__Chloroflexota;c__Chloroflexia;o__Thermomicrobiales;f__CADCWN01;g__CADCWN01;s__Unclassified	METABOLISM	F	Nucleotide transport and metabolism	96
MAG163	d__Bacteria;p__Chloroflexota;c__Chloroflexia;o__Thermomicrobiales;f__CADCWN01;g__CADCWN01;s__Unclassified	METABOLISM	G	Carbohydrate transport and metabolism	367
MAG163	d__Bacteria;p__Chloroflexota;c__Chloroflexia;o__Thermomicrobiales;f__CADCWN01;g__CADCWN01;s__Unclassified	METABOLISM	H	Coenzyme transport and metabolism	293
MAG163	d__Bacteria;p__Chloroflexota;c__Chloroflexia;o__Thermomicrobiales;f__CADCWN01;g__CADCWN01;s__Unclassified	METABOLISM	I	Lipid transport and metabolism	192
MAG163	d__Bacteria;p__Chloroflexota;c__Chloroflexia;o__Thermomicrobiales;f__CADCWN01;g__CADCWN01;s__Unclassified	METABOLISM	P	Inorganic ion transport and metabolism	206
MAG163	d__Bacteria;p__Chloroflexota;c__Chloroflexia;o__Thermomicrobiales;f__CADCWN01;g__CADCWN01;s__Unclassified	METABOLISM	Q	Secondary metabolites biosynthesis, transport and catabolism	93
MAG163	d__Bacteria;p__Chloroflexota;c__Chloroflexia;o__Thermomicrobiales;f__CADCWN01;g__CADCWN01;s__Unclassified	POORLY CHARACTERIZED	R	General function prediction only	504
MAG163	d__Bacteria;p__Chloroflexota;c__Chloroflexia;o__Thermomicrobiales;f__CADCWN01;g__CADCWN01;s__Unclassified	POORLY CHARACTERIZED	S	Function unknown	105
MAG171	d__Bacteria;p__Actinomycetota;c__Actinomycetia;o__Mycobacteriales;f__Mycobacteriaceae;g__Dietzia;s__Unclassified	CELLULAR PROCESSES AND SIGNALING	D	Cell cycle control, cell division, chromosome partitioning	35
MAG171	d__Bacteria;p__Actinomycetota;c__Actinomycetia;o__Mycobacteriales;f__Mycobacteriaceae;g__Dietzia;s__Unclassified	CELLULAR PROCESSES AND SIGNALING	M	Cell wall/membrane/envelope biogenesis	120
MAG171	d__Bacteria;p__Actinomycetota;c__Actinomycetia;o__Mycobacteriales;f__Mycobacteriaceae;g__Dietzia;s__Unclassified	CELLULAR PROCESSES AND SIGNALING	N	Cell motility	5
MAG171	d__Bacteria;p__Actinomycetota;c__Actinomycetia;o__Mycobacteriales;f__Mycobacteriaceae;g__Dietzia;s__Unclassified	CELLULAR PROCESSES AND SIGNALING	O	Posttranslational modification, protein turnover, chaperones	81
MAG171	d__Bacteria;p__Actinomycetota;c__Actinomycetia;o__Mycobacteriales;f__Mycobacteriaceae;g__Dietzia;s__Unclassified	CELLULAR PROCESSES AND SIGNALING	T	Signal transduction mechanisms	68
MAG171	d__Bacteria;p__Actinomycetota;c__Actinomycetia;o__Mycobacteriales;f__Mycobacteriaceae;g__Dietzia;s__Unclassified	CELLULAR PROCESSES AND SIGNALING	U	Intracellular trafficking, secretion, and vesicular transport	16
MAG171	d__Bacteria;p__Actinomycetota;c__Actinomycetia;o__Mycobacteriales;f__Mycobacteriaceae;g__Dietzia;s__Unclassified	CELLULAR PROCESSES AND SIGNALING	V	Defense mechanisms	48
MAG171	d__Bacteria;p__Actinomycetota;c__Actinomycetia;o__Mycobacteriales;f__Mycobacteriaceae;g__Dietzia;s__Unclassified	CELLULAR PROCESSES AND SIGNALING	W	Extracellular structures	4
MAG171	d__Bacteria;p__Actinomycetota;c__Actinomycetia;o__Mycobacteriales;f__Mycobacteriaceae;g__Dietzia;s__Unclassified	CELLULAR PROCESSES AND SIGNALING	X	Mobilome: prophages, transposons	4
MAG171	d__Bacteria;p__Actinomycetota;c__Actinomycetia;o__Mycobacteriales;f__Mycobacteriaceae;g__Dietzia;s__Unclassified	CELLULAR PROCESSES AND SIGNALING	Z	Cytoskeleton	1
MAG171	d__Bacteria;p__Actinomycetota;c__Actinomycetia;o__Mycobacteriales;f__Mycobacteriaceae;g__Dietzia;s__Unclassified	INFORMATION STORAGE AND PROCESSING	A	RNA processing and modification	1
MAG171	d__Bacteria;p__Actinomycetota;c__Actinomycetia;o__Mycobacteriales;f__Mycobacteriaceae;g__Dietzia;s__Unclassified	INFORMATION STORAGE AND PROCESSING	J	Translation, ribosomal structure and biogenesis	164
MAG171	d__Bacteria;p__Actinomycetota;c__Actinomycetia;o__Mycobacteriales;f__Mycobacteriaceae;g__Dietzia;s__Unclassified	INFORMATION STORAGE AND PROCESSING	K	Transcription	148
MAG171	d__Bacteria;p__Actinomycetota;c__Actinomycetia;o__Mycobacteriales;f__Mycobacteriaceae;g__Dietzia;s__Unclassified	INFORMATION STORAGE AND PROCESSING	L	Replication, recombination and repair	96
MAG171	d__Bacteria;p__Actinomycetota;c__Actinomycetia;o__Mycobacteriales;f__Mycobacteriaceae;g__Dietzia;s__Unclassified	METABOLISM	C	Energy production and conversion	134
MAG171	d__Bacteria;p__Actinomycetota;c__Actinomycetia;o__Mycobacteriales;f__Mycobacteriaceae;g__Dietzia;s__Unclassified	METABOLISM	E	Amino acid transport and metabolism	150
MAG171	d__Bacteria;p__Actinomycetota;c__Actinomycetia;o__Mycobacteriales;f__Mycobacteriaceae;g__Dietzia;s__Unclassified	METABOLISM	F	Nucleotide transport and metabolism	63
MAG171	d__Bacteria;p__Actinomycetota;c__Actinomycetia;o__Mycobacteriales;f__Mycobacteriaceae;g__Dietzia;s__Unclassified	METABOLISM	G	Carbohydrate transport and metabolism	128
MAG171	d__Bacteria;p__Actinomycetota;c__Actinomycetia;o__Mycobacteriales;f__Mycobacteriaceae;g__Dietzia;s__Unclassified	METABOLISM	H	Coenzyme transport and metabolism	162
MAG171	d__Bacteria;p__Actinomycetota;c__Actinomycetia;o__Mycobacteriales;f__Mycobacteriaceae;g__Dietzia;s__Unclassified	METABOLISM	I	Lipid transport and metabolism	238
MAG171	d__Bacteria;p__Actinomycetota;c__Actinomycetia;o__Mycobacteriales;f__Mycobacteriaceae;g__Dietzia;s__Unclassified	METABOLISM	P	Inorganic ion transport and metabolism	114
MAG171	d__Bacteria;p__Actinomycetota;c__Actinomycetia;o__Mycobacteriales;f__Mycobacteriaceae;g__Dietzia;s__Unclassified	METABOLISM	Q	Secondary metabolites biosynthesis, transport and catabolism	38
MAG171	d__Bacteria;p__Actinomycetota;c__Actinomycetia;o__Mycobacteriales;f__Mycobacteriaceae;g__Dietzia;s__Unclassified	POORLY CHARACTERIZED	R	General function prediction only	173
MAG171	d__Bacteria;p__Actinomycetota;c__Actinomycetia;o__Mycobacteriales;f__Mycobacteriaceae;g__Dietzia;s__Unclassified	POORLY CHARACTERIZED	S	Function unknown	59
MAG174	d__Bacteria;p__Actinomycetota;c__Actinomycetia;o__Actinomycetales;f__Micrococcaceae;g__Arthrobacter;s__Arthrobacter oxydans	CELLULAR PROCESSES AND SIGNALING	D	Cell cycle control, cell division, chromosome partitioning	61
MAG174	d__Bacteria;p__Actinomycetota;c__Actinomycetia;o__Actinomycetales;f__Micrococcaceae;g__Arthrobacter;s__Arthrobacter oxydans	CELLULAR PROCESSES AND SIGNALING	M	Cell wall/membrane/envelope biogenesis	144
MAG174	d__Bacteria;p__Actinomycetota;c__Actinomycetia;o__Actinomycetales;f__Micrococcaceae;g__Arthrobacter;s__Arthrobacter oxydans	CELLULAR PROCESSES AND SIGNALING	N	Cell motility	12
MAG174	d__Bacteria;p__Actinomycetota;c__Actinomycetia;o__Actinomycetales;f__Micrococcaceae;g__Arthrobacter;s__Arthrobacter oxydans	CELLULAR PROCESSES AND SIGNALING	O	Posttranslational modification, protein turnover, chaperones	140
MAG174	d__Bacteria;p__Actinomycetota;c__Actinomycetia;o__Actinomycetales;f__Micrococcaceae;g__Arthrobacter;s__Arthrobacter oxydans	CELLULAR PROCESSES AND SIGNALING	T	Signal transduction mechanisms	175
MAG174	d__Bacteria;p__Actinomycetota;c__Actinomycetia;o__Actinomycetales;f__Micrococcaceae;g__Arthrobacter;s__Arthrobacter oxydans	CELLULAR PROCESSES AND SIGNALING	U	Intracellular trafficking, secretion, and vesicular transport	31
MAG174	d__Bacteria;p__Actinomycetota;c__Actinomycetia;o__Actinomycetales;f__Micrococcaceae;g__Arthrobacter;s__Arthrobacter oxydans	CELLULAR PROCESSES AND SIGNALING	V	Defense mechanisms	76
MAG174	d__Bacteria;p__Actinomycetota;c__Actinomycetia;o__Actinomycetales;f__Micrococcaceae;g__Arthrobacter;s__Arthrobacter oxydans	CELLULAR PROCESSES AND SIGNALING	W	Extracellular structures	9
MAG174	d__Bacteria;p__Actinomycetota;c__Actinomycetia;o__Actinomycetales;f__Micrococcaceae;g__Arthrobacter;s__Arthrobacter oxydans	CELLULAR PROCESSES AND SIGNALING	X	Mobilome: prophages, transposons	6
MAG174	d__Bacteria;p__Actinomycetota;c__Actinomycetia;o__Actinomycetales;f__Micrococcaceae;g__Arthrobacter;s__Arthrobacter oxydans	INFORMATION STORAGE AND PROCESSING	A	RNA processing and modification	1
MAG174	d__Bacteria;p__Actinomycetota;c__Actinomycetia;o__Actinomycetales;f__Micrococcaceae;g__Arthrobacter;s__Arthrobacter oxydans	INFORMATION STORAGE AND PROCESSING	J	Translation, ribosomal structure and biogenesis	172
MAG174	d__Bacteria;p__Actinomycetota;c__Actinomycetia;o__Actinomycetales;f__Micrococcaceae;g__Arthrobacter;s__Arthrobacter oxydans	INFORMATION STORAGE AND PROCESSING	K	Transcription	307
MAG174	d__Bacteria;p__Actinomycetota;c__Actinomycetia;o__Actinomycetales;f__Micrococcaceae;g__Arthrobacter;s__Arthrobacter oxydans	INFORMATION STORAGE AND PROCESSING	L	Replication, recombination and repair	150
MAG174	d__Bacteria;p__Actinomycetota;c__Actinomycetia;o__Actinomycetales;f__Micrococcaceae;g__Arthrobacter;s__Arthrobacter oxydans	METABOLISM	C	Energy production and conversion	159
MAG174	d__Bacteria;p__Actinomycetota;c__Actinomycetia;o__Actinomycetales;f__Micrococcaceae;g__Arthrobacter;s__Arthrobacter oxydans	METABOLISM	E	Amino acid transport and metabolism	331
MAG174	d__Bacteria;p__Actinomycetota;c__Actinomycetia;o__Actinomycetales;f__Micrococcaceae;g__Arthrobacter;s__Arthrobacter oxydans	METABOLISM	F	Nucleotide transport and metabolism	108
MAG174	d__Bacteria;p__Actinomycetota;c__Actinomycetia;o__Actinomycetales;f__Micrococcaceae;g__Arthrobacter;s__Arthrobacter oxydans	METABOLISM	G	Carbohydrate transport and metabolism	380
MAG174	d__Bacteria;p__Actinomycetota;c__Actinomycetia;o__Actinomycetales;f__Micrococcaceae;g__Arthrobacter;s__Arthrobacter oxydans	METABOLISM	H	Coenzyme transport and metabolism	193
MAG174	d__Bacteria;p__Actinomycetota;c__Actinomycetia;o__Actinomycetales;f__Micrococcaceae;g__Arthrobacter;s__Arthrobacter oxydans	METABOLISM	I	Lipid transport and metabolism	174
MAG174	d__Bacteria;p__Actinomycetota;c__Actinomycetia;o__Actinomycetales;f__Micrococcaceae;g__Arthrobacter;s__Arthrobacter oxydans	METABOLISM	P	Inorganic ion transport and metabolism	186
MAG174	d__Bacteria;p__Actinomycetota;c__Actinomycetia;o__Actinomycetales;f__Micrococcaceae;g__Arthrobacter;s__Arthrobacter oxydans	METABOLISM	Q	Secondary metabolites biosynthesis, transport and catabolism	60
MAG174	d__Bacteria;p__Actinomycetota;c__Actinomycetia;o__Actinomycetales;f__Micrococcaceae;g__Arthrobacter;s__Arthrobacter oxydans	POORLY CHARACTERIZED	R	General function prediction only	272
MAG174	d__Bacteria;p__Actinomycetota;c__Actinomycetia;o__Actinomycetales;f__Micrococcaceae;g__Arthrobacter;s__Arthrobacter oxydans	POORLY CHARACTERIZED	S	Function unknown	114
MAG183	d__Bacteria;p__Bacillota;c__Bacilli;o__Bacillales_D;f__Amphibacillaceae;g__Virgibacillus_B;s__Unclassified	CELLULAR PROCESSES AND SIGNALING	D	Cell cycle control, cell division, chromosome partitioning	128
MAG183	d__Bacteria;p__Bacillota;c__Bacilli;o__Bacillales_D;f__Amphibacillaceae;g__Virgibacillus_B;s__Unclassified	CELLULAR PROCESSES AND SIGNALING	M	Cell wall/membrane/envelope biogenesis	116
MAG183	d__Bacteria;p__Bacillota;c__Bacilli;o__Bacillales_D;f__Amphibacillaceae;g__Virgibacillus_B;s__Unclassified	CELLULAR PROCESSES AND SIGNALING	N	Cell motility	35
MAG183	d__Bacteria;p__Bacillota;c__Bacilli;o__Bacillales_D;f__Amphibacillaceae;g__Virgibacillus_B;s__Unclassified	CELLULAR PROCESSES AND SIGNALING	O	Posttranslational modification, protein turnover, chaperones	99
MAG183	d__Bacteria;p__Bacillota;c__Bacilli;o__Bacillales_D;f__Amphibacillaceae;g__Virgibacillus_B;s__Unclassified	CELLULAR PROCESSES AND SIGNALING	T	Signal transduction mechanisms	132
MAG183	d__Bacteria;p__Bacillota;c__Bacilli;o__Bacillales_D;f__Amphibacillaceae;g__Virgibacillus_B;s__Unclassified	CELLULAR PROCESSES AND SIGNALING	U	Intracellular trafficking, secretion, and vesicular transport	23
MAG183	d__Bacteria;p__Bacillota;c__Bacilli;o__Bacillales_D;f__Amphibacillaceae;g__Virgibacillus_B;s__Unclassified	CELLULAR PROCESSES AND SIGNALING	V	Defense mechanisms	65
MAG183	d__Bacteria;p__Bacillota;c__Bacilli;o__Bacillales_D;f__Amphibacillaceae;g__Virgibacillus_B;s__Unclassified	CELLULAR PROCESSES AND SIGNALING	W	Extracellular structures	6
MAG183	d__Bacteria;p__Bacillota;c__Bacilli;o__Bacillales_D;f__Amphibacillaceae;g__Virgibacillus_B;s__Unclassified	CELLULAR PROCESSES AND SIGNALING	X	Mobilome: prophages, transposons	11
MAG183	d__Bacteria;p__Bacillota;c__Bacilli;o__Bacillales_D;f__Amphibacillaceae;g__Virgibacillus_B;s__Unclassified	CELLULAR PROCESSES AND SIGNALING	Z	Cytoskeleton	3
MAG183	d__Bacteria;p__Bacillota;c__Bacilli;o__Bacillales_D;f__Amphibacillaceae;g__Virgibacillus_B;s__Unclassified	INFORMATION STORAGE AND PROCESSING	J	Translation, ribosomal structure and biogenesis	150
MAG183	d__Bacteria;p__Bacillota;c__Bacilli;o__Bacillales_D;f__Amphibacillaceae;g__Virgibacillus_B;s__Unclassified	INFORMATION STORAGE AND PROCESSING	K	Transcription	152
MAG183	d__Bacteria;p__Bacillota;c__Bacilli;o__Bacillales_D;f__Amphibacillaceae;g__Virgibacillus_B;s__Unclassified	INFORMATION STORAGE AND PROCESSING	L	Replication, recombination and repair	85
MAG183	d__Bacteria;p__Bacillota;c__Bacilli;o__Bacillales_D;f__Amphibacillaceae;g__Virgibacillus_B;s__Unclassified	METABOLISM	C	Energy production and conversion	91
MAG183	d__Bacteria;p__Bacillota;c__Bacilli;o__Bacillales_D;f__Amphibacillaceae;g__Virgibacillus_B;s__Unclassified	METABOLISM	E	Amino acid transport and metabolism	150
MAG183	d__Bacteria;p__Bacillota;c__Bacilli;o__Bacillales_D;f__Amphibacillaceae;g__Virgibacillus_B;s__Unclassified	METABOLISM	F	Nucleotide transport and metabolism	67
MAG183	d__Bacteria;p__Bacillota;c__Bacilli;o__Bacillales_D;f__Amphibacillaceae;g__Virgibacillus_B;s__Unclassified	METABOLISM	G	Carbohydrate transport and metabolism	178
MAG183	d__Bacteria;p__Bacillota;c__Bacilli;o__Bacillales_D;f__Amphibacillaceae;g__Virgibacillus_B;s__Unclassified	METABOLISM	H	Coenzyme transport and metabolism	116
MAG183	d__Bacteria;p__Bacillota;c__Bacilli;o__Bacillales_D;f__Amphibacillaceae;g__Virgibacillus_B;s__Unclassified	METABOLISM	I	Lipid transport and metabolism	71
MAG183	d__Bacteria;p__Bacillota;c__Bacilli;o__Bacillales_D;f__Amphibacillaceae;g__Virgibacillus_B;s__Unclassified	METABOLISM	P	Inorganic ion transport and metabolism	106
MAG183	d__Bacteria;p__Bacillota;c__Bacilli;o__Bacillales_D;f__Amphibacillaceae;g__Virgibacillus_B;s__Unclassified	METABOLISM	Q	Secondary metabolites biosynthesis, transport and catabolism	20
MAG183	d__Bacteria;p__Bacillota;c__Bacilli;o__Bacillales_D;f__Amphibacillaceae;g__Virgibacillus_B;s__Unclassified	POORLY CHARACTERIZED	R	General function prediction only	148
MAG183	d__Bacteria;p__Bacillota;c__Bacilli;o__Bacillales_D;f__Amphibacillaceae;g__Virgibacillus_B;s__Unclassified	POORLY CHARACTERIZED	S	Function unknown	98
MAG187	d__Bacteria;p__Actinomycetota;c__Actinomycetia;o__Propionibacteriales;f__Propionibacteriaceae;g__Luteococcus;s__Luteococcus japonicus	CELLULAR PROCESSES AND SIGNALING	D	Cell cycle control, cell division, chromosome partitioning	27
MAG187	d__Bacteria;p__Actinomycetota;c__Actinomycetia;o__Propionibacteriales;f__Propionibacteriaceae;g__Luteococcus;s__Luteococcus japonicus	CELLULAR PROCESSES AND SIGNALING	M	Cell wall/membrane/envelope biogenesis	116
MAG187	d__Bacteria;p__Actinomycetota;c__Actinomycetia;o__Propionibacteriales;f__Propionibacteriaceae;g__Luteococcus;s__Luteococcus japonicus	CELLULAR PROCESSES AND SIGNALING	N	Cell motility	7
MAG187	d__Bacteria;p__Actinomycetota;c__Actinomycetia;o__Propionibacteriales;f__Propionibacteriaceae;g__Luteococcus;s__Luteococcus japonicus	CELLULAR PROCESSES AND SIGNALING	O	Posttranslational modification, protein turnover, chaperones	73
MAG187	d__Bacteria;p__Actinomycetota;c__Actinomycetia;o__Propionibacteriales;f__Propionibacteriaceae;g__Luteococcus;s__Luteococcus japonicus	CELLULAR PROCESSES AND SIGNALING	T	Signal transduction mechanisms	104
MAG187	d__Bacteria;p__Actinomycetota;c__Actinomycetia;o__Propionibacteriales;f__Propionibacteriaceae;g__Luteococcus;s__Luteococcus japonicus	CELLULAR PROCESSES AND SIGNALING	U	Intracellular trafficking, secretion, and vesicular transport	19
MAG187	d__Bacteria;p__Actinomycetota;c__Actinomycetia;o__Propionibacteriales;f__Propionibacteriaceae;g__Luteococcus;s__Luteococcus japonicus	CELLULAR PROCESSES AND SIGNALING	V	Defense mechanisms	48
MAG187	d__Bacteria;p__Actinomycetota;c__Actinomycetia;o__Propionibacteriales;f__Propionibacteriaceae;g__Luteococcus;s__Luteococcus japonicus	CELLULAR PROCESSES AND SIGNALING	W	Extracellular structures	8
MAG187	d__Bacteria;p__Actinomycetota;c__Actinomycetia;o__Propionibacteriales;f__Propionibacteriaceae;g__Luteococcus;s__Luteococcus japonicus	CELLULAR PROCESSES AND SIGNALING	X	Mobilome: prophages, transposons	8
MAG187	d__Bacteria;p__Actinomycetota;c__Actinomycetia;o__Propionibacteriales;f__Propionibacteriaceae;g__Luteococcus;s__Luteococcus japonicus	INFORMATION STORAGE AND PROCESSING	A	RNA processing and modification	1
MAG187	d__Bacteria;p__Actinomycetota;c__Actinomycetia;o__Propionibacteriales;f__Propionibacteriaceae;g__Luteococcus;s__Luteococcus japonicus	INFORMATION STORAGE AND PROCESSING	J	Translation, ribosomal structure and biogenesis	122
MAG187	d__Bacteria;p__Actinomycetota;c__Actinomycetia;o__Propionibacteriales;f__Propionibacteriaceae;g__Luteococcus;s__Luteococcus japonicus	INFORMATION STORAGE AND PROCESSING	K	Transcription	154
MAG187	d__Bacteria;p__Actinomycetota;c__Actinomycetia;o__Propionibacteriales;f__Propionibacteriaceae;g__Luteococcus;s__Luteococcus japonicus	INFORMATION STORAGE AND PROCESSING	L	Replication, recombination and repair	85
MAG187	d__Bacteria;p__Actinomycetota;c__Actinomycetia;o__Propionibacteriales;f__Propionibacteriaceae;g__Luteococcus;s__Luteococcus japonicus	METABOLISM	C	Energy production and conversion	119
MAG187	d__Bacteria;p__Actinomycetota;c__Actinomycetia;o__Propionibacteriales;f__Propionibacteriaceae;g__Luteococcus;s__Luteococcus japonicus	METABOLISM	E	Amino acid transport and metabolism	172
MAG187	d__Bacteria;p__Actinomycetota;c__Actinomycetia;o__Propionibacteriales;f__Propionibacteriaceae;g__Luteococcus;s__Luteococcus japonicus	METABOLISM	F	Nucleotide transport and metabolism	69
MAG187	d__Bacteria;p__Actinomycetota;c__Actinomycetia;o__Propionibacteriales;f__Propionibacteriaceae;g__Luteococcus;s__Luteococcus japonicus	METABOLISM	G	Carbohydrate transport and metabolism	209
MAG187	d__Bacteria;p__Actinomycetota;c__Actinomycetia;o__Propionibacteriales;f__Propionibacteriaceae;g__Luteococcus;s__Luteococcus japonicus	METABOLISM	H	Coenzyme transport and metabolism	120
MAG187	d__Bacteria;p__Actinomycetota;c__Actinomycetia;o__Propionibacteriales;f__Propionibacteriaceae;g__Luteococcus;s__Luteococcus japonicus	METABOLISM	I	Lipid transport and metabolism	77
MAG187	d__Bacteria;p__Actinomycetota;c__Actinomycetia;o__Propionibacteriales;f__Propionibacteriaceae;g__Luteococcus;s__Luteococcus japonicus	METABOLISM	P	Inorganic ion transport and metabolism	112
MAG187	d__Bacteria;p__Actinomycetota;c__Actinomycetia;o__Propionibacteriales;f__Propionibacteriaceae;g__Luteococcus;s__Luteococcus japonicus	METABOLISM	Q	Secondary metabolites biosynthesis, transport and catabolism	24
MAG187	d__Bacteria;p__Actinomycetota;c__Actinomycetia;o__Propionibacteriales;f__Propionibacteriaceae;g__Luteococcus;s__Luteococcus japonicus	POORLY CHARACTERIZED	R	General function prediction only	146
MAG187	d__Bacteria;p__Actinomycetota;c__Actinomycetia;o__Propionibacteriales;f__Propionibacteriaceae;g__Luteococcus;s__Luteococcus japonicus	POORLY CHARACTERIZED	S	Function unknown	53
MAG191	d__Bacteria;p__Tectomicrobia;c__Entotheonellia;o__Entotheonellales;f__Entotheonellaceae;g__SXND01;s__Unclassified	CELLULAR PROCESSES AND SIGNALING	D	Cell cycle control, cell division, chromosome partitioning	62
MAG191	d__Bacteria;p__Tectomicrobia;c__Entotheonellia;o__Entotheonellales;f__Entotheonellaceae;g__SXND01;s__Unclassified	CELLULAR PROCESSES AND SIGNALING	M	Cell wall/membrane/envelope biogenesis	248
MAG191	d__Bacteria;p__Tectomicrobia;c__Entotheonellia;o__Entotheonellales;f__Entotheonellaceae;g__SXND01;s__Unclassified	CELLULAR PROCESSES AND SIGNALING	N	Cell motility	58
MAG191	d__Bacteria;p__Tectomicrobia;c__Entotheonellia;o__Entotheonellales;f__Entotheonellaceae;g__SXND01;s__Unclassified	CELLULAR PROCESSES AND SIGNALING	O	Posttranslational modification, protein turnover, chaperones	213
MAG191	d__Bacteria;p__Tectomicrobia;c__Entotheonellia;o__Entotheonellales;f__Entotheonellaceae;g__SXND01;s__Unclassified	CELLULAR PROCESSES AND SIGNALING	T	Signal transduction mechanisms	281
MAG191	d__Bacteria;p__Tectomicrobia;c__Entotheonellia;o__Entotheonellales;f__Entotheonellaceae;g__SXND01;s__Unclassified	CELLULAR PROCESSES AND SIGNALING	U	Intracellular trafficking, secretion, and vesicular transport	60
MAG191	d__Bacteria;p__Tectomicrobia;c__Entotheonellia;o__Entotheonellales;f__Entotheonellaceae;g__SXND01;s__Unclassified	CELLULAR PROCESSES AND SIGNALING	V	Defense mechanisms	196
MAG191	d__Bacteria;p__Tectomicrobia;c__Entotheonellia;o__Entotheonellales;f__Entotheonellaceae;g__SXND01;s__Unclassified	CELLULAR PROCESSES AND SIGNALING	W	Extracellular structures	36
MAG191	d__Bacteria;p__Tectomicrobia;c__Entotheonellia;o__Entotheonellales;f__Entotheonellaceae;g__SXND01;s__Unclassified	CELLULAR PROCESSES AND SIGNALING	X	Mobilome: prophages, transposons	245
MAG191	d__Bacteria;p__Tectomicrobia;c__Entotheonellia;o__Entotheonellales;f__Entotheonellaceae;g__SXND01;s__Unclassified	CELLULAR PROCESSES AND SIGNALING	Z	Cytoskeleton	3
MAG191	d__Bacteria;p__Tectomicrobia;c__Entotheonellia;o__Entotheonellales;f__Entotheonellaceae;g__SXND01;s__Unclassified	INFORMATION STORAGE AND PROCESSING	J	Translation, ribosomal structure and biogenesis	246
MAG191	d__Bacteria;p__Tectomicrobia;c__Entotheonellia;o__Entotheonellales;f__Entotheonellaceae;g__SXND01;s__Unclassified	INFORMATION STORAGE AND PROCESSING	K	Transcription	154
MAG191	d__Bacteria;p__Tectomicrobia;c__Entotheonellia;o__Entotheonellales;f__Entotheonellaceae;g__SXND01;s__Unclassified	INFORMATION STORAGE AND PROCESSING	L	Replication, recombination and repair	208
MAG191	d__Bacteria;p__Tectomicrobia;c__Entotheonellia;o__Entotheonellales;f__Entotheonellaceae;g__SXND01;s__Unclassified	METABOLISM	C	Energy production and conversion	335
MAG191	d__Bacteria;p__Tectomicrobia;c__Entotheonellia;o__Entotheonellales;f__Entotheonellaceae;g__SXND01;s__Unclassified	METABOLISM	E	Amino acid transport and metabolism	468
MAG191	d__Bacteria;p__Tectomicrobia;c__Entotheonellia;o__Entotheonellales;f__Entotheonellaceae;g__SXND01;s__Unclassified	METABOLISM	F	Nucleotide transport and metabolism	96
MAG191	d__Bacteria;p__Tectomicrobia;c__Entotheonellia;o__Entotheonellales;f__Entotheonellaceae;g__SXND01;s__Unclassified	METABOLISM	G	Carbohydrate transport and metabolism	295
MAG191	d__Bacteria;p__Tectomicrobia;c__Entotheonellia;o__Entotheonellales;f__Entotheonellaceae;g__SXND01;s__Unclassified	METABOLISM	H	Coenzyme transport and metabolism	422
MAG191	d__Bacteria;p__Tectomicrobia;c__Entotheonellia;o__Entotheonellales;f__Entotheonellaceae;g__SXND01;s__Unclassified	METABOLISM	I	Lipid transport and metabolism	323
MAG191	d__Bacteria;p__Tectomicrobia;c__Entotheonellia;o__Entotheonellales;f__Entotheonellaceae;g__SXND01;s__Unclassified	METABOLISM	P	Inorganic ion transport and metabolism	263
MAG191	d__Bacteria;p__Tectomicrobia;c__Entotheonellia;o__Entotheonellales;f__Entotheonellaceae;g__SXND01;s__Unclassified	METABOLISM	Q	Secondary metabolites biosynthesis, transport and catabolism	153
MAG191	d__Bacteria;p__Tectomicrobia;c__Entotheonellia;o__Entotheonellales;f__Entotheonellaceae;g__SXND01;s__Unclassified	POORLY CHARACTERIZED	R	General function prediction only	679
MAG191	d__Bacteria;p__Tectomicrobia;c__Entotheonellia;o__Entotheonellales;f__Entotheonellaceae;g__SXND01;s__Unclassified	POORLY CHARACTERIZED	S	Function unknown	132
MAG198	d__Bacteria;p__Pseudomonadota;c__Alphaproteobacteria;o__Rhizobiales;f__Xanthobacteraceae;g__Nitrobacter;s__Unclassified	CELLULAR PROCESSES AND SIGNALING	D	Cell cycle control, cell division, chromosome partitioning	83
MAG198	d__Bacteria;p__Pseudomonadota;c__Alphaproteobacteria;o__Rhizobiales;f__Xanthobacteraceae;g__Nitrobacter;s__Unclassified	CELLULAR PROCESSES AND SIGNALING	M	Cell wall/membrane/envelope biogenesis	317
MAG198	d__Bacteria;p__Pseudomonadota;c__Alphaproteobacteria;o__Rhizobiales;f__Xanthobacteraceae;g__Nitrobacter;s__Unclassified	CELLULAR PROCESSES AND SIGNALING	N	Cell motility	79
MAG198	d__Bacteria;p__Pseudomonadota;c__Alphaproteobacteria;o__Rhizobiales;f__Xanthobacteraceae;g__Nitrobacter;s__Unclassified	CELLULAR PROCESSES AND SIGNALING	O	Posttranslational modification, protein turnover, chaperones	220
MAG198	d__Bacteria;p__Pseudomonadota;c__Alphaproteobacteria;o__Rhizobiales;f__Xanthobacteraceae;g__Nitrobacter;s__Unclassified	CELLULAR PROCESSES AND SIGNALING	T	Signal transduction mechanisms	329
MAG198	d__Bacteria;p__Pseudomonadota;c__Alphaproteobacteria;o__Rhizobiales;f__Xanthobacteraceae;g__Nitrobacter;s__Unclassified	CELLULAR PROCESSES AND SIGNALING	U	Intracellular trafficking, secretion, and vesicular transport	118
MAG198	d__Bacteria;p__Pseudomonadota;c__Alphaproteobacteria;o__Rhizobiales;f__Xanthobacteraceae;g__Nitrobacter;s__Unclassified	CELLULAR PROCESSES AND SIGNALING	V	Defense mechanisms	145
MAG198	d__Bacteria;p__Pseudomonadota;c__Alphaproteobacteria;o__Rhizobiales;f__Xanthobacteraceae;g__Nitrobacter;s__Unclassified	CELLULAR PROCESSES AND SIGNALING	W	Extracellular structures	68
MAG198	d__Bacteria;p__Pseudomonadota;c__Alphaproteobacteria;o__Rhizobiales;f__Xanthobacteraceae;g__Nitrobacter;s__Unclassified	CELLULAR PROCESSES AND SIGNALING	X	Mobilome: prophages, transposons	323
MAG198	d__Bacteria;p__Pseudomonadota;c__Alphaproteobacteria;o__Rhizobiales;f__Xanthobacteraceae;g__Nitrobacter;s__Unclassified	CELLULAR PROCESSES AND SIGNALING	Z	Cytoskeleton	4
MAG198	d__Bacteria;p__Pseudomonadota;c__Alphaproteobacteria;o__Rhizobiales;f__Xanthobacteraceae;g__Nitrobacter;s__Unclassified	INFORMATION STORAGE AND PROCESSING	A	RNA processing and modification	1
MAG198	d__Bacteria;p__Pseudomonadota;c__Alphaproteobacteria;o__Rhizobiales;f__Xanthobacteraceae;g__Nitrobacter;s__Unclassified	INFORMATION STORAGE AND PROCESSING	B	Chromatin structure and dynamics	1
MAG198	d__Bacteria;p__Pseudomonadota;c__Alphaproteobacteria;o__Rhizobiales;f__Xanthobacteraceae;g__Nitrobacter;s__Unclassified	INFORMATION STORAGE AND PROCESSING	J	Translation, ribosomal structure and biogenesis	258
MAG198	d__Bacteria;p__Pseudomonadota;c__Alphaproteobacteria;o__Rhizobiales;f__Xanthobacteraceae;g__Nitrobacter;s__Unclassified	INFORMATION STORAGE AND PROCESSING	K	Transcription	299
MAG198	d__Bacteria;p__Pseudomonadota;c__Alphaproteobacteria;o__Rhizobiales;f__Xanthobacteraceae;g__Nitrobacter;s__Unclassified	INFORMATION STORAGE AND PROCESSING	L	Replication, recombination and repair	230
MAG198	d__Bacteria;p__Pseudomonadota;c__Alphaproteobacteria;o__Rhizobiales;f__Xanthobacteraceae;g__Nitrobacter;s__Unclassified	METABOLISM	C	Energy production and conversion	274
MAG198	d__Bacteria;p__Pseudomonadota;c__Alphaproteobacteria;o__Rhizobiales;f__Xanthobacteraceae;g__Nitrobacter;s__Unclassified	METABOLISM	E	Amino acid transport and metabolism	321
MAG198	d__Bacteria;p__Pseudomonadota;c__Alphaproteobacteria;o__Rhizobiales;f__Xanthobacteraceae;g__Nitrobacter;s__Unclassified	METABOLISM	F	Nucleotide transport and metabolism	116
MAG198	d__Bacteria;p__Pseudomonadota;c__Alphaproteobacteria;o__Rhizobiales;f__Xanthobacteraceae;g__Nitrobacter;s__Unclassified	METABOLISM	G	Carbohydrate transport and metabolism	286
MAG198	d__Bacteria;p__Pseudomonadota;c__Alphaproteobacteria;o__Rhizobiales;f__Xanthobacteraceae;g__Nitrobacter;s__Unclassified	METABOLISM	H	Coenzyme transport and metabolism	209
MAG198	d__Bacteria;p__Pseudomonadota;c__Alphaproteobacteria;o__Rhizobiales;f__Xanthobacteraceae;g__Nitrobacter;s__Unclassified	METABOLISM	I	Lipid transport and metabolism	202
MAG198	d__Bacteria;p__Pseudomonadota;c__Alphaproteobacteria;o__Rhizobiales;f__Xanthobacteraceae;g__Nitrobacter;s__Unclassified	METABOLISM	P	Inorganic ion transport and metabolism	283
MAG198	d__Bacteria;p__Pseudomonadota;c__Alphaproteobacteria;o__Rhizobiales;f__Xanthobacteraceae;g__Nitrobacter;s__Unclassified	METABOLISM	Q	Secondary metabolites biosynthesis, transport and catabolism	92
MAG198	d__Bacteria;p__Pseudomonadota;c__Alphaproteobacteria;o__Rhizobiales;f__Xanthobacteraceae;g__Nitrobacter;s__Unclassified	POORLY CHARACTERIZED	R	General function prediction only	367
MAG198	d__Bacteria;p__Pseudomonadota;c__Alphaproteobacteria;o__Rhizobiales;f__Xanthobacteraceae;g__Nitrobacter;s__Unclassified	POORLY CHARACTERIZED	S	Function unknown	240
MAG204	d__Bacteria;p__Pseudomonadota;c__Gammaproteobacteria;o__Steroidobacterales;f__Steroidobacteraceae;g__SCUD01;s__Unclassified	CELLULAR PROCESSES AND SIGNALING	D	Cell cycle control, cell division, chromosome partitioning	27
MAG204	d__Bacteria;p__Pseudomonadota;c__Gammaproteobacteria;o__Steroidobacterales;f__Steroidobacteraceae;g__SCUD01;s__Unclassified	CELLULAR PROCESSES AND SIGNALING	M	Cell wall/membrane/envelope biogenesis	162
MAG204	d__Bacteria;p__Pseudomonadota;c__Gammaproteobacteria;o__Steroidobacterales;f__Steroidobacteraceae;g__SCUD01;s__Unclassified	CELLULAR PROCESSES AND SIGNALING	N	Cell motility	24
MAG204	d__Bacteria;p__Pseudomonadota;c__Gammaproteobacteria;o__Steroidobacterales;f__Steroidobacteraceae;g__SCUD01;s__Unclassified	CELLULAR PROCESSES AND SIGNALING	O	Posttranslational modification, protein turnover, chaperones	155
MAG204	d__Bacteria;p__Pseudomonadota;c__Gammaproteobacteria;o__Steroidobacterales;f__Steroidobacteraceae;g__SCUD01;s__Unclassified	CELLULAR PROCESSES AND SIGNALING	T	Signal transduction mechanisms	151
MAG204	d__Bacteria;p__Pseudomonadota;c__Gammaproteobacteria;o__Steroidobacterales;f__Steroidobacteraceae;g__SCUD01;s__Unclassified	CELLULAR PROCESSES AND SIGNALING	U	Intracellular trafficking, secretion, and vesicular transport	30
MAG204	d__Bacteria;p__Pseudomonadota;c__Gammaproteobacteria;o__Steroidobacterales;f__Steroidobacteraceae;g__SCUD01;s__Unclassified	CELLULAR PROCESSES AND SIGNALING	V	Defense mechanisms	74
MAG204	d__Bacteria;p__Pseudomonadota;c__Gammaproteobacteria;o__Steroidobacterales;f__Steroidobacteraceae;g__SCUD01;s__Unclassified	CELLULAR PROCESSES AND SIGNALING	W	Extracellular structures	24
MAG204	d__Bacteria;p__Pseudomonadota;c__Gammaproteobacteria;o__Steroidobacterales;f__Steroidobacteraceae;g__SCUD01;s__Unclassified	CELLULAR PROCESSES AND SIGNALING	X	Mobilome: prophages, transposons	13
MAG204	d__Bacteria;p__Pseudomonadota;c__Gammaproteobacteria;o__Steroidobacterales;f__Steroidobacteraceae;g__SCUD01;s__Unclassified	CELLULAR PROCESSES AND SIGNALING	Z	Cytoskeleton	1
MAG204	d__Bacteria;p__Pseudomonadota;c__Gammaproteobacteria;o__Steroidobacterales;f__Steroidobacteraceae;g__SCUD01;s__Unclassified	INFORMATION STORAGE AND PROCESSING	J	Translation, ribosomal structure and biogenesis	165
MAG204	d__Bacteria;p__Pseudomonadota;c__Gammaproteobacteria;o__Steroidobacterales;f__Steroidobacteraceae;g__SCUD01;s__Unclassified	INFORMATION STORAGE AND PROCESSING	K	Transcription	112
MAG204	d__Bacteria;p__Pseudomonadota;c__Gammaproteobacteria;o__Steroidobacterales;f__Steroidobacteraceae;g__SCUD01;s__Unclassified	INFORMATION STORAGE AND PROCESSING	L	Replication, recombination and repair	81
MAG204	d__Bacteria;p__Pseudomonadota;c__Gammaproteobacteria;o__Steroidobacterales;f__Steroidobacteraceae;g__SCUD01;s__Unclassified	METABOLISM	C	Energy production and conversion	158
MAG204	d__Bacteria;p__Pseudomonadota;c__Gammaproteobacteria;o__Steroidobacterales;f__Steroidobacteraceae;g__SCUD01;s__Unclassified	METABOLISM	E	Amino acid transport and metabolism	220
MAG204	d__Bacteria;p__Pseudomonadota;c__Gammaproteobacteria;o__Steroidobacterales;f__Steroidobacteraceae;g__SCUD01;s__Unclassified	METABOLISM	F	Nucleotide transport and metabolism	49
MAG204	d__Bacteria;p__Pseudomonadota;c__Gammaproteobacteria;o__Steroidobacterales;f__Steroidobacteraceae;g__SCUD01;s__Unclassified	METABOLISM	G	Carbohydrate transport and metabolism	76
MAG204	d__Bacteria;p__Pseudomonadota;c__Gammaproteobacteria;o__Steroidobacterales;f__Steroidobacteraceae;g__SCUD01;s__Unclassified	METABOLISM	H	Coenzyme transport and metabolism	119
MAG204	d__Bacteria;p__Pseudomonadota;c__Gammaproteobacteria;o__Steroidobacterales;f__Steroidobacteraceae;g__SCUD01;s__Unclassified	METABOLISM	I	Lipid transport and metabolism	97
MAG204	d__Bacteria;p__Pseudomonadota;c__Gammaproteobacteria;o__Steroidobacterales;f__Steroidobacteraceae;g__SCUD01;s__Unclassified	METABOLISM	P	Inorganic ion transport and metabolism	97
MAG204	d__Bacteria;p__Pseudomonadota;c__Gammaproteobacteria;o__Steroidobacterales;f__Steroidobacteraceae;g__SCUD01;s__Unclassified	METABOLISM	Q	Secondary metabolites biosynthesis, transport and catabolism	62
MAG204	d__Bacteria;p__Pseudomonadota;c__Gammaproteobacteria;o__Steroidobacterales;f__Steroidobacteraceae;g__SCUD01;s__Unclassified	POORLY CHARACTERIZED	R	General function prediction only	178
MAG204	d__Bacteria;p__Pseudomonadota;c__Gammaproteobacteria;o__Steroidobacterales;f__Steroidobacteraceae;g__SCUD01;s__Unclassified	POORLY CHARACTERIZED	S	Function unknown	87
MAG205	d__Bacteria;p__Patescibacteria;c__SICC01;o__SICC01;f__SICC01;g__Unclassified;s__Unclassified	CELLULAR PROCESSES AND SIGNALING	D	Cell cycle control, cell division, chromosome partitioning	21
MAG205	d__Bacteria;p__Patescibacteria;c__SICC01;o__SICC01;f__SICC01;g__Unclassified;s__Unclassified	CELLULAR PROCESSES AND SIGNALING	M	Cell wall/membrane/envelope biogenesis	62
MAG205	d__Bacteria;p__Patescibacteria;c__SICC01;o__SICC01;f__SICC01;g__Unclassified;s__Unclassified	CELLULAR PROCESSES AND SIGNALING	N	Cell motility	9
MAG205	d__Bacteria;p__Patescibacteria;c__SICC01;o__SICC01;f__SICC01;g__Unclassified;s__Unclassified	CELLULAR PROCESSES AND SIGNALING	O	Posttranslational modification, protein turnover, chaperones	43
MAG205	d__Bacteria;p__Patescibacteria;c__SICC01;o__SICC01;f__SICC01;g__Unclassified;s__Unclassified	CELLULAR PROCESSES AND SIGNALING	T	Signal transduction mechanisms	28
MAG205	d__Bacteria;p__Patescibacteria;c__SICC01;o__SICC01;f__SICC01;g__Unclassified;s__Unclassified	CELLULAR PROCESSES AND SIGNALING	U	Intracellular trafficking, secretion, and vesicular transport	17
MAG205	d__Bacteria;p__Patescibacteria;c__SICC01;o__SICC01;f__SICC01;g__Unclassified;s__Unclassified	CELLULAR PROCESSES AND SIGNALING	V	Defense mechanisms	6
MAG205	d__Bacteria;p__Patescibacteria;c__SICC01;o__SICC01;f__SICC01;g__Unclassified;s__Unclassified	CELLULAR PROCESSES AND SIGNALING	W	Extracellular structures	5
MAG205	d__Bacteria;p__Patescibacteria;c__SICC01;o__SICC01;f__SICC01;g__Unclassified;s__Unclassified	CELLULAR PROCESSES AND SIGNALING	X	Mobilome: prophages, transposons	1
MAG205	d__Bacteria;p__Patescibacteria;c__SICC01;o__SICC01;f__SICC01;g__Unclassified;s__Unclassified	CELLULAR PROCESSES AND SIGNALING	Z	Cytoskeleton	4
MAG205	d__Bacteria;p__Patescibacteria;c__SICC01;o__SICC01;f__SICC01;g__Unclassified;s__Unclassified	INFORMATION STORAGE AND PROCESSING	J	Translation, ribosomal structure and biogenesis	108
MAG205	d__Bacteria;p__Patescibacteria;c__SICC01;o__SICC01;f__SICC01;g__Unclassified;s__Unclassified	INFORMATION STORAGE AND PROCESSING	K	Transcription	35
MAG205	d__Bacteria;p__Patescibacteria;c__SICC01;o__SICC01;f__SICC01;g__Unclassified;s__Unclassified	INFORMATION STORAGE AND PROCESSING	L	Replication, recombination and repair	48
MAG205	d__Bacteria;p__Patescibacteria;c__SICC01;o__SICC01;f__SICC01;g__Unclassified;s__Unclassified	METABOLISM	C	Energy production and conversion	17
MAG205	d__Bacteria;p__Patescibacteria;c__SICC01;o__SICC01;f__SICC01;g__Unclassified;s__Unclassified	METABOLISM	E	Amino acid transport and metabolism	10
MAG205	d__Bacteria;p__Patescibacteria;c__SICC01;o__SICC01;f__SICC01;g__Unclassified;s__Unclassified	METABOLISM	F	Nucleotide transport and metabolism	24
MAG205	d__Bacteria;p__Patescibacteria;c__SICC01;o__SICC01;f__SICC01;g__Unclassified;s__Unclassified	METABOLISM	G	Carbohydrate transport and metabolism	21
MAG205	d__Bacteria;p__Patescibacteria;c__SICC01;o__SICC01;f__SICC01;g__Unclassified;s__Unclassified	METABOLISM	H	Coenzyme transport and metabolism	8
MAG205	d__Bacteria;p__Patescibacteria;c__SICC01;o__SICC01;f__SICC01;g__Unclassified;s__Unclassified	METABOLISM	I	Lipid transport and metabolism	12
MAG205	d__Bacteria;p__Patescibacteria;c__SICC01;o__SICC01;f__SICC01;g__Unclassified;s__Unclassified	METABOLISM	P	Inorganic ion transport and metabolism	6
MAG205	d__Bacteria;p__Patescibacteria;c__SICC01;o__SICC01;f__SICC01;g__Unclassified;s__Unclassified	METABOLISM	Q	Secondary metabolites biosynthesis, transport and catabolism	2
MAG205	d__Bacteria;p__Patescibacteria;c__SICC01;o__SICC01;f__SICC01;g__Unclassified;s__Unclassified	POORLY CHARACTERIZED	R	General function prediction only	20
MAG205	d__Bacteria;p__Patescibacteria;c__SICC01;o__SICC01;f__SICC01;g__Unclassified;s__Unclassified	POORLY CHARACTERIZED	S	Function unknown	12
MAG206	d__Bacteria;p__Actinomycetota;c__Actinomycetia;o__Actinomycetales;f__Microbacteriaceae;g__Agromyces;s__Unclassified	CELLULAR PROCESSES AND SIGNALING	D	Cell cycle control, cell division, chromosome partitioning	38
MAG206	d__Bacteria;p__Actinomycetota;c__Actinomycetia;o__Actinomycetales;f__Microbacteriaceae;g__Agromyces;s__Unclassified	CELLULAR PROCESSES AND SIGNALING	M	Cell wall/membrane/envelope biogenesis	119
MAG206	d__Bacteria;p__Actinomycetota;c__Actinomycetia;o__Actinomycetales;f__Microbacteriaceae;g__Agromyces;s__Unclassified	CELLULAR PROCESSES AND SIGNALING	N	Cell motility	9
MAG206	d__Bacteria;p__Actinomycetota;c__Actinomycetia;o__Actinomycetales;f__Microbacteriaceae;g__Agromyces;s__Unclassified	CELLULAR PROCESSES AND SIGNALING	O	Posttranslational modification, protein turnover, chaperones	99
MAG206	d__Bacteria;p__Actinomycetota;c__Actinomycetia;o__Actinomycetales;f__Microbacteriaceae;g__Agromyces;s__Unclassified	CELLULAR PROCESSES AND SIGNALING	T	Signal transduction mechanisms	118
MAG206	d__Bacteria;p__Actinomycetota;c__Actinomycetia;o__Actinomycetales;f__Microbacteriaceae;g__Agromyces;s__Unclassified	CELLULAR PROCESSES AND SIGNALING	U	Intracellular trafficking, secretion, and vesicular transport	20
MAG206	d__Bacteria;p__Actinomycetota;c__Actinomycetia;o__Actinomycetales;f__Microbacteriaceae;g__Agromyces;s__Unclassified	CELLULAR PROCESSES AND SIGNALING	V	Defense mechanisms	69
MAG206	d__Bacteria;p__Actinomycetota;c__Actinomycetia;o__Actinomycetales;f__Microbacteriaceae;g__Agromyces;s__Unclassified	CELLULAR PROCESSES AND SIGNALING	W	Extracellular structures	5
MAG206	d__Bacteria;p__Actinomycetota;c__Actinomycetia;o__Actinomycetales;f__Microbacteriaceae;g__Agromyces;s__Unclassified	CELLULAR PROCESSES AND SIGNALING	X	Mobilome: prophages, transposons	5
MAG206	d__Bacteria;p__Actinomycetota;c__Actinomycetia;o__Actinomycetales;f__Microbacteriaceae;g__Agromyces;s__Unclassified	CELLULAR PROCESSES AND SIGNALING	Z	Cytoskeleton	1
MAG206	d__Bacteria;p__Actinomycetota;c__Actinomycetia;o__Actinomycetales;f__Microbacteriaceae;g__Agromyces;s__Unclassified	INFORMATION STORAGE AND PROCESSING	A	RNA processing and modification	1
MAG206	d__Bacteria;p__Actinomycetota;c__Actinomycetia;o__Actinomycetales;f__Microbacteriaceae;g__Agromyces;s__Unclassified	INFORMATION STORAGE AND PROCESSING	J	Translation, ribosomal structure and biogenesis	124
MAG206	d__Bacteria;p__Actinomycetota;c__Actinomycetia;o__Actinomycetales;f__Microbacteriaceae;g__Agromyces;s__Unclassified	INFORMATION STORAGE AND PROCESSING	K	Transcription	214
MAG206	d__Bacteria;p__Actinomycetota;c__Actinomycetia;o__Actinomycetales;f__Microbacteriaceae;g__Agromyces;s__Unclassified	INFORMATION STORAGE AND PROCESSING	L	Replication, recombination and repair	97
MAG206	d__Bacteria;p__Actinomycetota;c__Actinomycetia;o__Actinomycetales;f__Microbacteriaceae;g__Agromyces;s__Unclassified	METABOLISM	C	Energy production and conversion	130
MAG206	d__Bacteria;p__Actinomycetota;c__Actinomycetia;o__Actinomycetales;f__Microbacteriaceae;g__Agromyces;s__Unclassified	METABOLISM	E	Amino acid transport and metabolism	219
MAG206	d__Bacteria;p__Actinomycetota;c__Actinomycetia;o__Actinomycetales;f__Microbacteriaceae;g__Agromyces;s__Unclassified	METABOLISM	F	Nucleotide transport and metabolism	78
MAG206	d__Bacteria;p__Actinomycetota;c__Actinomycetia;o__Actinomycetales;f__Microbacteriaceae;g__Agromyces;s__Unclassified	METABOLISM	G	Carbohydrate transport and metabolism	212
MAG206	d__Bacteria;p__Actinomycetota;c__Actinomycetia;o__Actinomycetales;f__Microbacteriaceae;g__Agromyces;s__Unclassified	METABOLISM	H	Coenzyme transport and metabolism	157
MAG206	d__Bacteria;p__Actinomycetota;c__Actinomycetia;o__Actinomycetales;f__Microbacteriaceae;g__Agromyces;s__Unclassified	METABOLISM	I	Lipid transport and metabolism	125
MAG206	d__Bacteria;p__Actinomycetota;c__Actinomycetia;o__Actinomycetales;f__Microbacteriaceae;g__Agromyces;s__Unclassified	METABOLISM	P	Inorganic ion transport and metabolism	111
MAG206	d__Bacteria;p__Actinomycetota;c__Actinomycetia;o__Actinomycetales;f__Microbacteriaceae;g__Agromyces;s__Unclassified	METABOLISM	Q	Secondary metabolites biosynthesis, transport and catabolism	41
MAG206	d__Bacteria;p__Actinomycetota;c__Actinomycetia;o__Actinomycetales;f__Microbacteriaceae;g__Agromyces;s__Unclassified	POORLY CHARACTERIZED	R	General function prediction only	195
MAG206	d__Bacteria;p__Actinomycetota;c__Actinomycetia;o__Actinomycetales;f__Microbacteriaceae;g__Agromyces;s__Unclassified	POORLY CHARACTERIZED	S	Function unknown	63
MAG209	d__Bacteria;p__Pseudomonadota;c__Gammaproteobacteria;o__Burkholderiales;f__Burkholderiaceae_A;g__Unclassified;s__Unclassified	CELLULAR PROCESSES AND SIGNALING	D	Cell cycle control, cell division, chromosome partitioning	44
MAG209	d__Bacteria;p__Pseudomonadota;c__Gammaproteobacteria;o__Burkholderiales;f__Burkholderiaceae_A;g__Unclassified;s__Unclassified	CELLULAR PROCESSES AND SIGNALING	M	Cell wall/membrane/envelope biogenesis	239
MAG209	d__Bacteria;p__Pseudomonadota;c__Gammaproteobacteria;o__Burkholderiales;f__Burkholderiaceae_A;g__Unclassified;s__Unclassified	CELLULAR PROCESSES AND SIGNALING	N	Cell motility	54
MAG209	d__Bacteria;p__Pseudomonadota;c__Gammaproteobacteria;o__Burkholderiales;f__Burkholderiaceae_A;g__Unclassified;s__Unclassified	CELLULAR PROCESSES AND SIGNALING	O	Posttranslational modification, protein turnover, chaperones	198
MAG209	d__Bacteria;p__Pseudomonadota;c__Gammaproteobacteria;o__Burkholderiales;f__Burkholderiaceae_A;g__Unclassified;s__Unclassified	CELLULAR PROCESSES AND SIGNALING	T	Signal transduction mechanisms	190
MAG209	d__Bacteria;p__Pseudomonadota;c__Gammaproteobacteria;o__Burkholderiales;f__Burkholderiaceae_A;g__Unclassified;s__Unclassified	CELLULAR PROCESSES AND SIGNALING	U	Intracellular trafficking, secretion, and vesicular transport	61
MAG209	d__Bacteria;p__Pseudomonadota;c__Gammaproteobacteria;o__Burkholderiales;f__Burkholderiaceae_A;g__Unclassified;s__Unclassified	CELLULAR PROCESSES AND SIGNALING	V	Defense mechanisms	63
MAG209	d__Bacteria;p__Pseudomonadota;c__Gammaproteobacteria;o__Burkholderiales;f__Burkholderiaceae_A;g__Unclassified;s__Unclassified	CELLULAR PROCESSES AND SIGNALING	W	Extracellular structures	46
MAG209	d__Bacteria;p__Pseudomonadota;c__Gammaproteobacteria;o__Burkholderiales;f__Burkholderiaceae_A;g__Unclassified;s__Unclassified	CELLULAR PROCESSES AND SIGNALING	X	Mobilome: prophages, transposons	2
MAG209	d__Bacteria;p__Pseudomonadota;c__Gammaproteobacteria;o__Burkholderiales;f__Burkholderiaceae_A;g__Unclassified;s__Unclassified	CELLULAR PROCESSES AND SIGNALING	Z	Cytoskeleton	3
MAG209	d__Bacteria;p__Pseudomonadota;c__Gammaproteobacteria;o__Burkholderiales;f__Burkholderiaceae_A;g__Unclassified;s__Unclassified	INFORMATION STORAGE AND PROCESSING	A	RNA processing and modification	1
MAG209	d__Bacteria;p__Pseudomonadota;c__Gammaproteobacteria;o__Burkholderiales;f__Burkholderiaceae_A;g__Unclassified;s__Unclassified	INFORMATION STORAGE AND PROCESSING	B	Chromatin structure and dynamics	1
MAG209	d__Bacteria;p__Pseudomonadota;c__Gammaproteobacteria;o__Burkholderiales;f__Burkholderiaceae_A;g__Unclassified;s__Unclassified	INFORMATION STORAGE AND PROCESSING	J	Translation, ribosomal structure and biogenesis	202
MAG209	d__Bacteria;p__Pseudomonadota;c__Gammaproteobacteria;o__Burkholderiales;f__Burkholderiaceae_A;g__Unclassified;s__Unclassified	INFORMATION STORAGE AND PROCESSING	K	Transcription	127
MAG209	d__Bacteria;p__Pseudomonadota;c__Gammaproteobacteria;o__Burkholderiales;f__Burkholderiaceae_A;g__Unclassified;s__Unclassified	INFORMATION STORAGE AND PROCESSING	L	Replication, recombination and repair	99
MAG209	d__Bacteria;p__Pseudomonadota;c__Gammaproteobacteria;o__Burkholderiales;f__Burkholderiaceae_A;g__Unclassified;s__Unclassified	METABOLISM	C	Energy production and conversion	262
MAG209	d__Bacteria;p__Pseudomonadota;c__Gammaproteobacteria;o__Burkholderiales;f__Burkholderiaceae_A;g__Unclassified;s__Unclassified	METABOLISM	E	Amino acid transport and metabolism	303
MAG209	d__Bacteria;p__Pseudomonadota;c__Gammaproteobacteria;o__Burkholderiales;f__Burkholderiaceae_A;g__Unclassified;s__Unclassified	METABOLISM	F	Nucleotide transport and metabolism	70
MAG209	d__Bacteria;p__Pseudomonadota;c__Gammaproteobacteria;o__Burkholderiales;f__Burkholderiaceae_A;g__Unclassified;s__Unclassified	METABOLISM	G	Carbohydrate transport and metabolism	131
MAG209	d__Bacteria;p__Pseudomonadota;c__Gammaproteobacteria;o__Burkholderiales;f__Burkholderiaceae_A;g__Unclassified;s__Unclassified	METABOLISM	H	Coenzyme transport and metabolism	163
MAG209	d__Bacteria;p__Pseudomonadota;c__Gammaproteobacteria;o__Burkholderiales;f__Burkholderiaceae_A;g__Unclassified;s__Unclassified	METABOLISM	I	Lipid transport and metabolism	169
MAG209	d__Bacteria;p__Pseudomonadota;c__Gammaproteobacteria;o__Burkholderiales;f__Burkholderiaceae_A;g__Unclassified;s__Unclassified	METABOLISM	P	Inorganic ion transport and metabolism	163
MAG209	d__Bacteria;p__Pseudomonadota;c__Gammaproteobacteria;o__Burkholderiales;f__Burkholderiaceae_A;g__Unclassified;s__Unclassified	METABOLISM	Q	Secondary metabolites biosynthesis, transport and catabolism	64
MAG209	d__Bacteria;p__Pseudomonadota;c__Gammaproteobacteria;o__Burkholderiales;f__Burkholderiaceae_A;g__Unclassified;s__Unclassified	POORLY CHARACTERIZED	R	General function prediction only	228
MAG209	d__Bacteria;p__Pseudomonadota;c__Gammaproteobacteria;o__Burkholderiales;f__Burkholderiaceae_A;g__Unclassified;s__Unclassified	POORLY CHARACTERIZED	S	Function unknown	115
MAG210	d__Bacteria;p__Bacteroidota;c__Bacteroidia;o__Chitinophagales;f__Chitinophagaceae;g__Unclassified;s__Unclassified	CELLULAR PROCESSES AND SIGNALING	D	Cell cycle control, cell division, chromosome partitioning	40
MAG210	d__Bacteria;p__Bacteroidota;c__Bacteroidia;o__Chitinophagales;f__Chitinophagaceae;g__Unclassified;s__Unclassified	CELLULAR PROCESSES AND SIGNALING	M	Cell wall/membrane/envelope biogenesis	198
MAG210	d__Bacteria;p__Bacteroidota;c__Bacteroidia;o__Chitinophagales;f__Chitinophagaceae;g__Unclassified;s__Unclassified	CELLULAR PROCESSES AND SIGNALING	N	Cell motility	17
MAG210	d__Bacteria;p__Bacteroidota;c__Bacteroidia;o__Chitinophagales;f__Chitinophagaceae;g__Unclassified;s__Unclassified	CELLULAR PROCESSES AND SIGNALING	O	Posttranslational modification, protein turnover, chaperones	129
MAG210	d__Bacteria;p__Bacteroidota;c__Bacteroidia;o__Chitinophagales;f__Chitinophagaceae;g__Unclassified;s__Unclassified	CELLULAR PROCESSES AND SIGNALING	T	Signal transduction mechanisms	127
MAG210	d__Bacteria;p__Bacteroidota;c__Bacteroidia;o__Chitinophagales;f__Chitinophagaceae;g__Unclassified;s__Unclassified	CELLULAR PROCESSES AND SIGNALING	U	Intracellular trafficking, secretion, and vesicular transport	33
MAG210	d__Bacteria;p__Bacteroidota;c__Bacteroidia;o__Chitinophagales;f__Chitinophagaceae;g__Unclassified;s__Unclassified	CELLULAR PROCESSES AND SIGNALING	V	Defense mechanisms	68
MAG210	d__Bacteria;p__Bacteroidota;c__Bacteroidia;o__Chitinophagales;f__Chitinophagaceae;g__Unclassified;s__Unclassified	CELLULAR PROCESSES AND SIGNALING	W	Extracellular structures	11
MAG210	d__Bacteria;p__Bacteroidota;c__Bacteroidia;o__Chitinophagales;f__Chitinophagaceae;g__Unclassified;s__Unclassified	CELLULAR PROCESSES AND SIGNALING	X	Mobilome: prophages, transposons	18
MAG210	d__Bacteria;p__Bacteroidota;c__Bacteroidia;o__Chitinophagales;f__Chitinophagaceae;g__Unclassified;s__Unclassified	CELLULAR PROCESSES AND SIGNALING	Z	Cytoskeleton	4
MAG210	d__Bacteria;p__Bacteroidota;c__Bacteroidia;o__Chitinophagales;f__Chitinophagaceae;g__Unclassified;s__Unclassified	INFORMATION STORAGE AND PROCESSING	J	Translation, ribosomal structure and biogenesis	199
MAG210	d__Bacteria;p__Bacteroidota;c__Bacteroidia;o__Chitinophagales;f__Chitinophagaceae;g__Unclassified;s__Unclassified	INFORMATION STORAGE AND PROCESSING	K	Transcription	110
MAG210	d__Bacteria;p__Bacteroidota;c__Bacteroidia;o__Chitinophagales;f__Chitinophagaceae;g__Unclassified;s__Unclassified	INFORMATION STORAGE AND PROCESSING	L	Replication, recombination and repair	123
MAG210	d__Bacteria;p__Bacteroidota;c__Bacteroidia;o__Chitinophagales;f__Chitinophagaceae;g__Unclassified;s__Unclassified	METABOLISM	C	Energy production and conversion	135
MAG210	d__Bacteria;p__Bacteroidota;c__Bacteroidia;o__Chitinophagales;f__Chitinophagaceae;g__Unclassified;s__Unclassified	METABOLISM	E	Amino acid transport and metabolism	188
MAG210	d__Bacteria;p__Bacteroidota;c__Bacteroidia;o__Chitinophagales;f__Chitinophagaceae;g__Unclassified;s__Unclassified	METABOLISM	F	Nucleotide transport and metabolism	80
MAG210	d__Bacteria;p__Bacteroidota;c__Bacteroidia;o__Chitinophagales;f__Chitinophagaceae;g__Unclassified;s__Unclassified	METABOLISM	G	Carbohydrate transport and metabolism	175
MAG210	d__Bacteria;p__Bacteroidota;c__Bacteroidia;o__Chitinophagales;f__Chitinophagaceae;g__Unclassified;s__Unclassified	METABOLISM	H	Coenzyme transport and metabolism	148
MAG210	d__Bacteria;p__Bacteroidota;c__Bacteroidia;o__Chitinophagales;f__Chitinophagaceae;g__Unclassified;s__Unclassified	METABOLISM	I	Lipid transport and metabolism	117
MAG210	d__Bacteria;p__Bacteroidota;c__Bacteroidia;o__Chitinophagales;f__Chitinophagaceae;g__Unclassified;s__Unclassified	METABOLISM	P	Inorganic ion transport and metabolism	132
MAG210	d__Bacteria;p__Bacteroidota;c__Bacteroidia;o__Chitinophagales;f__Chitinophagaceae;g__Unclassified;s__Unclassified	METABOLISM	Q	Secondary metabolites biosynthesis, transport and catabolism	34
MAG210	d__Bacteria;p__Bacteroidota;c__Bacteroidia;o__Chitinophagales;f__Chitinophagaceae;g__Unclassified;s__Unclassified	POORLY CHARACTERIZED	R	General function prediction only	207
MAG210	d__Bacteria;p__Bacteroidota;c__Bacteroidia;o__Chitinophagales;f__Chitinophagaceae;g__Unclassified;s__Unclassified	POORLY CHARACTERIZED	S	Function unknown	95
MAG213	d__Bacteria;p__Actinomycetota;c__Thermoleophilia;o__Gaiellales;f__Gaiellaceae;g__PALSA-600;s__Unclassified	CELLULAR PROCESSES AND SIGNALING	D	Cell cycle control, cell division, chromosome partitioning	33
MAG213	d__Bacteria;p__Actinomycetota;c__Thermoleophilia;o__Gaiellales;f__Gaiellaceae;g__PALSA-600;s__Unclassified	CELLULAR PROCESSES AND SIGNALING	M	Cell wall/membrane/envelope biogenesis	202
MAG213	d__Bacteria;p__Actinomycetota;c__Thermoleophilia;o__Gaiellales;f__Gaiellaceae;g__PALSA-600;s__Unclassified	CELLULAR PROCESSES AND SIGNALING	N	Cell motility	17
MAG213	d__Bacteria;p__Actinomycetota;c__Thermoleophilia;o__Gaiellales;f__Gaiellaceae;g__PALSA-600;s__Unclassified	CELLULAR PROCESSES AND SIGNALING	O	Posttranslational modification, protein turnover, chaperones	112
MAG213	d__Bacteria;p__Actinomycetota;c__Thermoleophilia;o__Gaiellales;f__Gaiellaceae;g__PALSA-600;s__Unclassified	CELLULAR PROCESSES AND SIGNALING	T	Signal transduction mechanisms	185
MAG213	d__Bacteria;p__Actinomycetota;c__Thermoleophilia;o__Gaiellales;f__Gaiellaceae;g__PALSA-600;s__Unclassified	CELLULAR PROCESSES AND SIGNALING	U	Intracellular trafficking, secretion, and vesicular transport	27
MAG213	d__Bacteria;p__Actinomycetota;c__Thermoleophilia;o__Gaiellales;f__Gaiellaceae;g__PALSA-600;s__Unclassified	CELLULAR PROCESSES AND SIGNALING	V	Defense mechanisms	53
MAG213	d__Bacteria;p__Actinomycetota;c__Thermoleophilia;o__Gaiellales;f__Gaiellaceae;g__PALSA-600;s__Unclassified	CELLULAR PROCESSES AND SIGNALING	W	Extracellular structures	14
MAG213	d__Bacteria;p__Actinomycetota;c__Thermoleophilia;o__Gaiellales;f__Gaiellaceae;g__PALSA-600;s__Unclassified	CELLULAR PROCESSES AND SIGNALING	X	Mobilome: prophages, transposons	7
MAG213	d__Bacteria;p__Actinomycetota;c__Thermoleophilia;o__Gaiellales;f__Gaiellaceae;g__PALSA-600;s__Unclassified	CELLULAR PROCESSES AND SIGNALING	Z	Cytoskeleton	2
MAG213	d__Bacteria;p__Actinomycetota;c__Thermoleophilia;o__Gaiellales;f__Gaiellaceae;g__PALSA-600;s__Unclassified	INFORMATION STORAGE AND PROCESSING	J	Translation, ribosomal structure and biogenesis	169
MAG213	d__Bacteria;p__Actinomycetota;c__Thermoleophilia;o__Gaiellales;f__Gaiellaceae;g__PALSA-600;s__Unclassified	INFORMATION STORAGE AND PROCESSING	K	Transcription	159
MAG213	d__Bacteria;p__Actinomycetota;c__Thermoleophilia;o__Gaiellales;f__Gaiellaceae;g__PALSA-600;s__Unclassified	INFORMATION STORAGE AND PROCESSING	L	Replication, recombination and repair	95
MAG213	d__Bacteria;p__Actinomycetota;c__Thermoleophilia;o__Gaiellales;f__Gaiellaceae;g__PALSA-600;s__Unclassified	METABOLISM	C	Energy production and conversion	131
MAG213	d__Bacteria;p__Actinomycetota;c__Thermoleophilia;o__Gaiellales;f__Gaiellaceae;g__PALSA-600;s__Unclassified	METABOLISM	E	Amino acid transport and metabolism	287
MAG213	d__Bacteria;p__Actinomycetota;c__Thermoleophilia;o__Gaiellales;f__Gaiellaceae;g__PALSA-600;s__Unclassified	METABOLISM	F	Nucleotide transport and metabolism	82
MAG213	d__Bacteria;p__Actinomycetota;c__Thermoleophilia;o__Gaiellales;f__Gaiellaceae;g__PALSA-600;s__Unclassified	METABOLISM	G	Carbohydrate transport and metabolism	204
MAG213	d__Bacteria;p__Actinomycetota;c__Thermoleophilia;o__Gaiellales;f__Gaiellaceae;g__PALSA-600;s__Unclassified	METABOLISM	H	Coenzyme transport and metabolism	165
MAG213	d__Bacteria;p__Actinomycetota;c__Thermoleophilia;o__Gaiellales;f__Gaiellaceae;g__PALSA-600;s__Unclassified	METABOLISM	I	Lipid transport and metabolism	115
MAG213	d__Bacteria;p__Actinomycetota;c__Thermoleophilia;o__Gaiellales;f__Gaiellaceae;g__PALSA-600;s__Unclassified	METABOLISM	P	Inorganic ion transport and metabolism	91
MAG213	d__Bacteria;p__Actinomycetota;c__Thermoleophilia;o__Gaiellales;f__Gaiellaceae;g__PALSA-600;s__Unclassified	METABOLISM	Q	Secondary metabolites biosynthesis, transport and catabolism	31
MAG213	d__Bacteria;p__Actinomycetota;c__Thermoleophilia;o__Gaiellales;f__Gaiellaceae;g__PALSA-600;s__Unclassified	POORLY CHARACTERIZED	R	General function prediction only	200
MAG213	d__Bacteria;p__Actinomycetota;c__Thermoleophilia;o__Gaiellales;f__Gaiellaceae;g__PALSA-600;s__Unclassified	POORLY CHARACTERIZED	S	Function unknown	69
MAG214	d__Bacteria;p__Acidobacteriota;c__Vicinamibacteria;o__Vicinamibacterales;f__UBA2999;g__12-FULL-67-14b;s__Unclassified	CELLULAR PROCESSES AND SIGNALING	D	Cell cycle control, cell division, chromosome partitioning	44
MAG214	d__Bacteria;p__Acidobacteriota;c__Vicinamibacteria;o__Vicinamibacterales;f__UBA2999;g__12-FULL-67-14b;s__Unclassified	CELLULAR PROCESSES AND SIGNALING	M	Cell wall/membrane/envelope biogenesis	278
MAG214	d__Bacteria;p__Acidobacteriota;c__Vicinamibacteria;o__Vicinamibacterales;f__UBA2999;g__12-FULL-67-14b;s__Unclassified	CELLULAR PROCESSES AND SIGNALING	N	Cell motility	38
MAG214	d__Bacteria;p__Acidobacteriota;c__Vicinamibacteria;o__Vicinamibacterales;f__UBA2999;g__12-FULL-67-14b;s__Unclassified	CELLULAR PROCESSES AND SIGNALING	O	Posttranslational modification, protein turnover, chaperones	187
MAG214	d__Bacteria;p__Acidobacteriota;c__Vicinamibacteria;o__Vicinamibacterales;f__UBA2999;g__12-FULL-67-14b;s__Unclassified	CELLULAR PROCESSES AND SIGNALING	T	Signal transduction mechanisms	235
MAG214	d__Bacteria;p__Acidobacteriota;c__Vicinamibacteria;o__Vicinamibacterales;f__UBA2999;g__12-FULL-67-14b;s__Unclassified	CELLULAR PROCESSES AND SIGNALING	U	Intracellular trafficking, secretion, and vesicular transport	59
MAG214	d__Bacteria;p__Acidobacteriota;c__Vicinamibacteria;o__Vicinamibacterales;f__UBA2999;g__12-FULL-67-14b;s__Unclassified	CELLULAR PROCESSES AND SIGNALING	V	Defense mechanisms	128
MAG214	d__Bacteria;p__Acidobacteriota;c__Vicinamibacteria;o__Vicinamibacterales;f__UBA2999;g__12-FULL-67-14b;s__Unclassified	CELLULAR PROCESSES AND SIGNALING	W	Extracellular structures	34
MAG214	d__Bacteria;p__Acidobacteriota;c__Vicinamibacteria;o__Vicinamibacterales;f__UBA2999;g__12-FULL-67-14b;s__Unclassified	CELLULAR PROCESSES AND SIGNALING	X	Mobilome: prophages, transposons	11
MAG214	d__Bacteria;p__Acidobacteriota;c__Vicinamibacteria;o__Vicinamibacterales;f__UBA2999;g__12-FULL-67-14b;s__Unclassified	CELLULAR PROCESSES AND SIGNALING	Z	Cytoskeleton	1
MAG214	d__Bacteria;p__Acidobacteriota;c__Vicinamibacteria;o__Vicinamibacterales;f__UBA2999;g__12-FULL-67-14b;s__Unclassified	INFORMATION STORAGE AND PROCESSING	J	Translation, ribosomal structure and biogenesis	181
MAG214	d__Bacteria;p__Acidobacteriota;c__Vicinamibacteria;o__Vicinamibacterales;f__UBA2999;g__12-FULL-67-14b;s__Unclassified	INFORMATION STORAGE AND PROCESSING	K	Transcription	156
MAG214	d__Bacteria;p__Acidobacteriota;c__Vicinamibacteria;o__Vicinamibacterales;f__UBA2999;g__12-FULL-67-14b;s__Unclassified	INFORMATION STORAGE AND PROCESSING	L	Replication, recombination and repair	107
MAG214	d__Bacteria;p__Acidobacteriota;c__Vicinamibacteria;o__Vicinamibacterales;f__UBA2999;g__12-FULL-67-14b;s__Unclassified	METABOLISM	C	Energy production and conversion	260
MAG214	d__Bacteria;p__Acidobacteriota;c__Vicinamibacteria;o__Vicinamibacterales;f__UBA2999;g__12-FULL-67-14b;s__Unclassified	METABOLISM	E	Amino acid transport and metabolism	349
MAG214	d__Bacteria;p__Acidobacteriota;c__Vicinamibacteria;o__Vicinamibacterales;f__UBA2999;g__12-FULL-67-14b;s__Unclassified	METABOLISM	F	Nucleotide transport and metabolism	85
MAG214	d__Bacteria;p__Acidobacteriota;c__Vicinamibacteria;o__Vicinamibacterales;f__UBA2999;g__12-FULL-67-14b;s__Unclassified	METABOLISM	G	Carbohydrate transport and metabolism	223
MAG214	d__Bacteria;p__Acidobacteriota;c__Vicinamibacteria;o__Vicinamibacterales;f__UBA2999;g__12-FULL-67-14b;s__Unclassified	METABOLISM	H	Coenzyme transport and metabolism	206
MAG214	d__Bacteria;p__Acidobacteriota;c__Vicinamibacteria;o__Vicinamibacterales;f__UBA2999;g__12-FULL-67-14b;s__Unclassified	METABOLISM	I	Lipid transport and metabolism	175
MAG214	d__Bacteria;p__Acidobacteriota;c__Vicinamibacteria;o__Vicinamibacterales;f__UBA2999;g__12-FULL-67-14b;s__Unclassified	METABOLISM	P	Inorganic ion transport and metabolism	182
MAG214	d__Bacteria;p__Acidobacteriota;c__Vicinamibacteria;o__Vicinamibacterales;f__UBA2999;g__12-FULL-67-14b;s__Unclassified	METABOLISM	Q	Secondary metabolites biosynthesis, transport and catabolism	104
MAG214	d__Bacteria;p__Acidobacteriota;c__Vicinamibacteria;o__Vicinamibacterales;f__UBA2999;g__12-FULL-67-14b;s__Unclassified	POORLY CHARACTERIZED	R	General function prediction only	314
MAG214	d__Bacteria;p__Acidobacteriota;c__Vicinamibacteria;o__Vicinamibacterales;f__UBA2999;g__12-FULL-67-14b;s__Unclassified	POORLY CHARACTERIZED	S	Function unknown	118
MAG221	d__Bacteria;p__Gemmatimonadota;c__Gemmatimonadetes;o__Longimicrobiales;f__RSA9;g__Unclassified;s__Unclassified	CELLULAR PROCESSES AND SIGNALING	D	Cell cycle control, cell division, chromosome partitioning	40
MAG221	d__Bacteria;p__Gemmatimonadota;c__Gemmatimonadetes;o__Longimicrobiales;f__RSA9;g__Unclassified;s__Unclassified	CELLULAR PROCESSES AND SIGNALING	M	Cell wall/membrane/envelope biogenesis	228
MAG221	d__Bacteria;p__Gemmatimonadota;c__Gemmatimonadetes;o__Longimicrobiales;f__RSA9;g__Unclassified;s__Unclassified	CELLULAR PROCESSES AND SIGNALING	N	Cell motility	35
MAG221	d__Bacteria;p__Gemmatimonadota;c__Gemmatimonadetes;o__Longimicrobiales;f__RSA9;g__Unclassified;s__Unclassified	CELLULAR PROCESSES AND SIGNALING	O	Posttranslational modification, protein turnover, chaperones	143
MAG221	d__Bacteria;p__Gemmatimonadota;c__Gemmatimonadetes;o__Longimicrobiales;f__RSA9;g__Unclassified;s__Unclassified	CELLULAR PROCESSES AND SIGNALING	T	Signal transduction mechanisms	240
MAG221	d__Bacteria;p__Gemmatimonadota;c__Gemmatimonadetes;o__Longimicrobiales;f__RSA9;g__Unclassified;s__Unclassified	CELLULAR PROCESSES AND SIGNALING	U	Intracellular trafficking, secretion, and vesicular transport	54
MAG221	d__Bacteria;p__Gemmatimonadota;c__Gemmatimonadetes;o__Longimicrobiales;f__RSA9;g__Unclassified;s__Unclassified	CELLULAR PROCESSES AND SIGNALING	V	Defense mechanisms	102
MAG221	d__Bacteria;p__Gemmatimonadota;c__Gemmatimonadetes;o__Longimicrobiales;f__RSA9;g__Unclassified;s__Unclassified	CELLULAR PROCESSES AND SIGNALING	W	Extracellular structures	28
MAG221	d__Bacteria;p__Gemmatimonadota;c__Gemmatimonadetes;o__Longimicrobiales;f__RSA9;g__Unclassified;s__Unclassified	CELLULAR PROCESSES AND SIGNALING	X	Mobilome: prophages, transposons	37
MAG221	d__Bacteria;p__Gemmatimonadota;c__Gemmatimonadetes;o__Longimicrobiales;f__RSA9;g__Unclassified;s__Unclassified	CELLULAR PROCESSES AND SIGNALING	Z	Cytoskeleton	2
MAG221	d__Bacteria;p__Gemmatimonadota;c__Gemmatimonadetes;o__Longimicrobiales;f__RSA9;g__Unclassified;s__Unclassified	INFORMATION STORAGE AND PROCESSING	B	Chromatin structure and dynamics	1
MAG221	d__Bacteria;p__Gemmatimonadota;c__Gemmatimonadetes;o__Longimicrobiales;f__RSA9;g__Unclassified;s__Unclassified	INFORMATION STORAGE AND PROCESSING	J	Translation, ribosomal structure and biogenesis	184
MAG221	d__Bacteria;p__Gemmatimonadota;c__Gemmatimonadetes;o__Longimicrobiales;f__RSA9;g__Unclassified;s__Unclassified	INFORMATION STORAGE AND PROCESSING	K	Transcription	141
MAG221	d__Bacteria;p__Gemmatimonadota;c__Gemmatimonadetes;o__Longimicrobiales;f__RSA9;g__Unclassified;s__Unclassified	INFORMATION STORAGE AND PROCESSING	L	Replication, recombination and repair	138
MAG221	d__Bacteria;p__Gemmatimonadota;c__Gemmatimonadetes;o__Longimicrobiales;f__RSA9;g__Unclassified;s__Unclassified	METABOLISM	C	Energy production and conversion	142
MAG221	d__Bacteria;p__Gemmatimonadota;c__Gemmatimonadetes;o__Longimicrobiales;f__RSA9;g__Unclassified;s__Unclassified	METABOLISM	E	Amino acid transport and metabolism	240
MAG221	d__Bacteria;p__Gemmatimonadota;c__Gemmatimonadetes;o__Longimicrobiales;f__RSA9;g__Unclassified;s__Unclassified	METABOLISM	F	Nucleotide transport and metabolism	71
MAG221	d__Bacteria;p__Gemmatimonadota;c__Gemmatimonadetes;o__Longimicrobiales;f__RSA9;g__Unclassified;s__Unclassified	METABOLISM	G	Carbohydrate transport and metabolism	151
MAG221	d__Bacteria;p__Gemmatimonadota;c__Gemmatimonadetes;o__Longimicrobiales;f__RSA9;g__Unclassified;s__Unclassified	METABOLISM	H	Coenzyme transport and metabolism	138
MAG221	d__Bacteria;p__Gemmatimonadota;c__Gemmatimonadetes;o__Longimicrobiales;f__RSA9;g__Unclassified;s__Unclassified	METABOLISM	I	Lipid transport and metabolism	114
MAG221	d__Bacteria;p__Gemmatimonadota;c__Gemmatimonadetes;o__Longimicrobiales;f__RSA9;g__Unclassified;s__Unclassified	METABOLISM	P	Inorganic ion transport and metabolism	118
MAG221	d__Bacteria;p__Gemmatimonadota;c__Gemmatimonadetes;o__Longimicrobiales;f__RSA9;g__Unclassified;s__Unclassified	METABOLISM	Q	Secondary metabolites biosynthesis, transport and catabolism	47
MAG221	d__Bacteria;p__Gemmatimonadota;c__Gemmatimonadetes;o__Longimicrobiales;f__RSA9;g__Unclassified;s__Unclassified	POORLY CHARACTERIZED	R	General function prediction only	237
MAG221	d__Bacteria;p__Gemmatimonadota;c__Gemmatimonadetes;o__Longimicrobiales;f__RSA9;g__Unclassified;s__Unclassified	POORLY CHARACTERIZED	S	Function unknown	68
MAG227	d__Bacteria;p__Chloroflexota;c__Limnocylindria;o__Limnocylindrales;f__CSP1-4;g__Unclassified;s__Unclassified	CELLULAR PROCESSES AND SIGNALING	D	Cell cycle control, cell division, chromosome partitioning	29
MAG227	d__Bacteria;p__Chloroflexota;c__Limnocylindria;o__Limnocylindrales;f__CSP1-4;g__Unclassified;s__Unclassified	CELLULAR PROCESSES AND SIGNALING	M	Cell wall/membrane/envelope biogenesis	101
MAG227	d__Bacteria;p__Chloroflexota;c__Limnocylindria;o__Limnocylindrales;f__CSP1-4;g__Unclassified;s__Unclassified	CELLULAR PROCESSES AND SIGNALING	N	Cell motility	6
MAG227	d__Bacteria;p__Chloroflexota;c__Limnocylindria;o__Limnocylindrales;f__CSP1-4;g__Unclassified;s__Unclassified	CELLULAR PROCESSES AND SIGNALING	O	Posttranslational modification, protein turnover, chaperones	91
MAG227	d__Bacteria;p__Chloroflexota;c__Limnocylindria;o__Limnocylindrales;f__CSP1-4;g__Unclassified;s__Unclassified	CELLULAR PROCESSES AND SIGNALING	T	Signal transduction mechanisms	151
MAG227	d__Bacteria;p__Chloroflexota;c__Limnocylindria;o__Limnocylindrales;f__CSP1-4;g__Unclassified;s__Unclassified	CELLULAR PROCESSES AND SIGNALING	U	Intracellular trafficking, secretion, and vesicular transport	26
MAG227	d__Bacteria;p__Chloroflexota;c__Limnocylindria;o__Limnocylindrales;f__CSP1-4;g__Unclassified;s__Unclassified	CELLULAR PROCESSES AND SIGNALING	V	Defense mechanisms	44
MAG227	d__Bacteria;p__Chloroflexota;c__Limnocylindria;o__Limnocylindrales;f__CSP1-4;g__Unclassified;s__Unclassified	CELLULAR PROCESSES AND SIGNALING	W	Extracellular structures	7
MAG227	d__Bacteria;p__Chloroflexota;c__Limnocylindria;o__Limnocylindrales;f__CSP1-4;g__Unclassified;s__Unclassified	CELLULAR PROCESSES AND SIGNALING	X	Mobilome: prophages, transposons	6
MAG227	d__Bacteria;p__Chloroflexota;c__Limnocylindria;o__Limnocylindrales;f__CSP1-4;g__Unclassified;s__Unclassified	CELLULAR PROCESSES AND SIGNALING	Z	Cytoskeleton	4
MAG227	d__Bacteria;p__Chloroflexota;c__Limnocylindria;o__Limnocylindrales;f__CSP1-4;g__Unclassified;s__Unclassified	INFORMATION STORAGE AND PROCESSING	J	Translation, ribosomal structure and biogenesis	120
MAG227	d__Bacteria;p__Chloroflexota;c__Limnocylindria;o__Limnocylindrales;f__CSP1-4;g__Unclassified;s__Unclassified	INFORMATION STORAGE AND PROCESSING	K	Transcription	137
MAG227	d__Bacteria;p__Chloroflexota;c__Limnocylindria;o__Limnocylindrales;f__CSP1-4;g__Unclassified;s__Unclassified	INFORMATION STORAGE AND PROCESSING	L	Replication, recombination and repair	101
MAG227	d__Bacteria;p__Chloroflexota;c__Limnocylindria;o__Limnocylindrales;f__CSP1-4;g__Unclassified;s__Unclassified	METABOLISM	C	Energy production and conversion	116
MAG227	d__Bacteria;p__Chloroflexota;c__Limnocylindria;o__Limnocylindrales;f__CSP1-4;g__Unclassified;s__Unclassified	METABOLISM	E	Amino acid transport and metabolism	164
MAG227	d__Bacteria;p__Chloroflexota;c__Limnocylindria;o__Limnocylindrales;f__CSP1-4;g__Unclassified;s__Unclassified	METABOLISM	F	Nucleotide transport and metabolism	78
MAG227	d__Bacteria;p__Chloroflexota;c__Limnocylindria;o__Limnocylindrales;f__CSP1-4;g__Unclassified;s__Unclassified	METABOLISM	G	Carbohydrate transport and metabolism	153
MAG227	d__Bacteria;p__Chloroflexota;c__Limnocylindria;o__Limnocylindrales;f__CSP1-4;g__Unclassified;s__Unclassified	METABOLISM	H	Coenzyme transport and metabolism	119
MAG227	d__Bacteria;p__Chloroflexota;c__Limnocylindria;o__Limnocylindrales;f__CSP1-4;g__Unclassified;s__Unclassified	METABOLISM	I	Lipid transport and metabolism	101
MAG227	d__Bacteria;p__Chloroflexota;c__Limnocylindria;o__Limnocylindrales;f__CSP1-4;g__Unclassified;s__Unclassified	METABOLISM	P	Inorganic ion transport and metabolism	93
MAG227	d__Bacteria;p__Chloroflexota;c__Limnocylindria;o__Limnocylindrales;f__CSP1-4;g__Unclassified;s__Unclassified	METABOLISM	Q	Secondary metabolites biosynthesis, transport and catabolism	37
MAG227	d__Bacteria;p__Chloroflexota;c__Limnocylindria;o__Limnocylindrales;f__CSP1-4;g__Unclassified;s__Unclassified	POORLY CHARACTERIZED	R	General function prediction only	174
MAG227	d__Bacteria;p__Chloroflexota;c__Limnocylindria;o__Limnocylindrales;f__CSP1-4;g__Unclassified;s__Unclassified	POORLY CHARACTERIZED	S	Function unknown	57
MAG229	d__Archaea;p__Thermoproteota;c__Nitrososphaeria;o__Nitrososphaerales;f__Nitrososphaeraceae;g__Nitrososphaera;s__Unclassified	CELLULAR PROCESSES AND SIGNALING	D	Cell cycle control, cell division, chromosome partitioning	21
MAG229	d__Archaea;p__Thermoproteota;c__Nitrososphaeria;o__Nitrososphaerales;f__Nitrososphaeraceae;g__Nitrososphaera;s__Unclassified	CELLULAR PROCESSES AND SIGNALING	M	Cell wall/membrane/envelope biogenesis	31
MAG229	d__Archaea;p__Thermoproteota;c__Nitrososphaeria;o__Nitrososphaerales;f__Nitrososphaeraceae;g__Nitrososphaera;s__Unclassified	CELLULAR PROCESSES AND SIGNALING	N	Cell motility	7
MAG229	d__Archaea;p__Thermoproteota;c__Nitrososphaeria;o__Nitrososphaerales;f__Nitrososphaeraceae;g__Nitrososphaera;s__Unclassified	CELLULAR PROCESSES AND SIGNALING	O	Posttranslational modification, protein turnover, chaperones	54
MAG229	d__Archaea;p__Thermoproteota;c__Nitrososphaeria;o__Nitrososphaerales;f__Nitrososphaeraceae;g__Nitrososphaera;s__Unclassified	CELLULAR PROCESSES AND SIGNALING	T	Signal transduction mechanisms	39
MAG229	d__Archaea;p__Thermoproteota;c__Nitrososphaeria;o__Nitrososphaerales;f__Nitrososphaeraceae;g__Nitrososphaera;s__Unclassified	CELLULAR PROCESSES AND SIGNALING	U	Intracellular trafficking, secretion, and vesicular transport	29
MAG229	d__Archaea;p__Thermoproteota;c__Nitrososphaeria;o__Nitrososphaerales;f__Nitrososphaeraceae;g__Nitrososphaera;s__Unclassified	CELLULAR PROCESSES AND SIGNALING	V	Defense mechanisms	18
MAG229	d__Archaea;p__Thermoproteota;c__Nitrososphaeria;o__Nitrososphaerales;f__Nitrososphaeraceae;g__Nitrososphaera;s__Unclassified	CELLULAR PROCESSES AND SIGNALING	W	Extracellular structures	4
MAG229	d__Archaea;p__Thermoproteota;c__Nitrososphaeria;o__Nitrososphaerales;f__Nitrososphaeraceae;g__Nitrososphaera;s__Unclassified	CELLULAR PROCESSES AND SIGNALING	X	Mobilome: prophages, transposons	10
MAG229	d__Archaea;p__Thermoproteota;c__Nitrososphaeria;o__Nitrososphaerales;f__Nitrososphaeraceae;g__Nitrososphaera;s__Unclassified	INFORMATION STORAGE AND PROCESSING	A	RNA processing and modification	1
MAG229	d__Archaea;p__Thermoproteota;c__Nitrososphaeria;o__Nitrososphaerales;f__Nitrososphaeraceae;g__Nitrososphaera;s__Unclassified	INFORMATION STORAGE AND PROCESSING	J	Translation, ribosomal structure and biogenesis	171
MAG229	d__Archaea;p__Thermoproteota;c__Nitrososphaeria;o__Nitrososphaerales;f__Nitrososphaeraceae;g__Nitrososphaera;s__Unclassified	INFORMATION STORAGE AND PROCESSING	K	Transcription	53
MAG229	d__Archaea;p__Thermoproteota;c__Nitrososphaeria;o__Nitrososphaerales;f__Nitrososphaeraceae;g__Nitrososphaera;s__Unclassified	INFORMATION STORAGE AND PROCESSING	L	Replication, recombination and repair	82
MAG229	d__Archaea;p__Thermoproteota;c__Nitrososphaeria;o__Nitrososphaerales;f__Nitrososphaeraceae;g__Nitrososphaera;s__Unclassified	METABOLISM	C	Energy production and conversion	77
MAG229	d__Archaea;p__Thermoproteota;c__Nitrososphaeria;o__Nitrososphaerales;f__Nitrososphaeraceae;g__Nitrososphaera;s__Unclassified	METABOLISM	E	Amino acid transport and metabolism	115
MAG229	d__Archaea;p__Thermoproteota;c__Nitrososphaeria;o__Nitrososphaerales;f__Nitrososphaeraceae;g__Nitrososphaera;s__Unclassified	METABOLISM	F	Nucleotide transport and metabolism	53
MAG229	d__Archaea;p__Thermoproteota;c__Nitrososphaeria;o__Nitrososphaerales;f__Nitrososphaeraceae;g__Nitrososphaera;s__Unclassified	METABOLISM	G	Carbohydrate transport and metabolism	51
MAG229	d__Archaea;p__Thermoproteota;c__Nitrososphaeria;o__Nitrososphaerales;f__Nitrososphaeraceae;g__Nitrososphaera;s__Unclassified	METABOLISM	H	Coenzyme transport and metabolism	106
MAG229	d__Archaea;p__Thermoproteota;c__Nitrososphaeria;o__Nitrososphaerales;f__Nitrososphaeraceae;g__Nitrososphaera;s__Unclassified	METABOLISM	I	Lipid transport and metabolism	26
MAG229	d__Archaea;p__Thermoproteota;c__Nitrososphaeria;o__Nitrososphaerales;f__Nitrososphaeraceae;g__Nitrososphaera;s__Unclassified	METABOLISM	P	Inorganic ion transport and metabolism	47
MAG229	d__Archaea;p__Thermoproteota;c__Nitrososphaeria;o__Nitrososphaerales;f__Nitrososphaeraceae;g__Nitrososphaera;s__Unclassified	METABOLISM	Q	Secondary metabolites biosynthesis, transport and catabolism	16
MAG229	d__Archaea;p__Thermoproteota;c__Nitrososphaeria;o__Nitrososphaerales;f__Nitrososphaeraceae;g__Nitrososphaera;s__Unclassified	POORLY CHARACTERIZED	R	General function prediction only	86
MAG229	d__Archaea;p__Thermoproteota;c__Nitrososphaeria;o__Nitrososphaerales;f__Nitrososphaeraceae;g__Nitrososphaera;s__Unclassified	POORLY CHARACTERIZED	S	Function unknown	22
MAG23	d__Bacteria;p__Acidobacteriota;c__Vicinamibacteria;o__Vicinamibacterales;f__UBA2999;g__12-FULL-67-14b;s__Unclassified	CELLULAR PROCESSES AND SIGNALING	D	Cell cycle control, cell division, chromosome partitioning	37
MAG23	d__Bacteria;p__Acidobacteriota;c__Vicinamibacteria;o__Vicinamibacterales;f__UBA2999;g__12-FULL-67-14b;s__Unclassified	CELLULAR PROCESSES AND SIGNALING	M	Cell wall/membrane/envelope biogenesis	232
MAG23	d__Bacteria;p__Acidobacteriota;c__Vicinamibacteria;o__Vicinamibacterales;f__UBA2999;g__12-FULL-67-14b;s__Unclassified	CELLULAR PROCESSES AND SIGNALING	N	Cell motility	38
MAG23	d__Bacteria;p__Acidobacteriota;c__Vicinamibacteria;o__Vicinamibacterales;f__UBA2999;g__12-FULL-67-14b;s__Unclassified	CELLULAR PROCESSES AND SIGNALING	O	Posttranslational modification, protein turnover, chaperones	170
MAG23	d__Bacteria;p__Acidobacteriota;c__Vicinamibacteria;o__Vicinamibacterales;f__UBA2999;g__12-FULL-67-14b;s__Unclassified	CELLULAR PROCESSES AND SIGNALING	T	Signal transduction mechanisms	198
MAG23	d__Bacteria;p__Acidobacteriota;c__Vicinamibacteria;o__Vicinamibacterales;f__UBA2999;g__12-FULL-67-14b;s__Unclassified	CELLULAR PROCESSES AND SIGNALING	U	Intracellular trafficking, secretion, and vesicular transport	63
MAG23	d__Bacteria;p__Acidobacteriota;c__Vicinamibacteria;o__Vicinamibacterales;f__UBA2999;g__12-FULL-67-14b;s__Unclassified	CELLULAR PROCESSES AND SIGNALING	V	Defense mechanisms	135
MAG23	d__Bacteria;p__Acidobacteriota;c__Vicinamibacteria;o__Vicinamibacterales;f__UBA2999;g__12-FULL-67-14b;s__Unclassified	CELLULAR PROCESSES AND SIGNALING	W	Extracellular structures	30
MAG23	d__Bacteria;p__Acidobacteriota;c__Vicinamibacteria;o__Vicinamibacterales;f__UBA2999;g__12-FULL-67-14b;s__Unclassified	CELLULAR PROCESSES AND SIGNALING	X	Mobilome: prophages, transposons	19
MAG23	d__Bacteria;p__Acidobacteriota;c__Vicinamibacteria;o__Vicinamibacterales;f__UBA2999;g__12-FULL-67-14b;s__Unclassified	CELLULAR PROCESSES AND SIGNALING	Z	Cytoskeleton	4
MAG23	d__Bacteria;p__Acidobacteriota;c__Vicinamibacteria;o__Vicinamibacterales;f__UBA2999;g__12-FULL-67-14b;s__Unclassified	INFORMATION STORAGE AND PROCESSING	B	Chromatin structure and dynamics	1
MAG23	d__Bacteria;p__Acidobacteriota;c__Vicinamibacteria;o__Vicinamibacterales;f__UBA2999;g__12-FULL-67-14b;s__Unclassified	INFORMATION STORAGE AND PROCESSING	J	Translation, ribosomal structure and biogenesis	204
MAG23	d__Bacteria;p__Acidobacteriota;c__Vicinamibacteria;o__Vicinamibacterales;f__UBA2999;g__12-FULL-67-14b;s__Unclassified	INFORMATION STORAGE AND PROCESSING	K	Transcription	148
MAG23	d__Bacteria;p__Acidobacteriota;c__Vicinamibacteria;o__Vicinamibacterales;f__UBA2999;g__12-FULL-67-14b;s__Unclassified	INFORMATION STORAGE AND PROCESSING	L	Replication, recombination and repair	103
MAG23	d__Bacteria;p__Acidobacteriota;c__Vicinamibacteria;o__Vicinamibacterales;f__UBA2999;g__12-FULL-67-14b;s__Unclassified	METABOLISM	C	Energy production and conversion	192
MAG23	d__Bacteria;p__Acidobacteriota;c__Vicinamibacteria;o__Vicinamibacterales;f__UBA2999;g__12-FULL-67-14b;s__Unclassified	METABOLISM	E	Amino acid transport and metabolism	280
MAG23	d__Bacteria;p__Acidobacteriota;c__Vicinamibacteria;o__Vicinamibacterales;f__UBA2999;g__12-FULL-67-14b;s__Unclassified	METABOLISM	F	Nucleotide transport and metabolism	64
MAG23	d__Bacteria;p__Acidobacteriota;c__Vicinamibacteria;o__Vicinamibacterales;f__UBA2999;g__12-FULL-67-14b;s__Unclassified	METABOLISM	G	Carbohydrate transport and metabolism	146
MAG23	d__Bacteria;p__Acidobacteriota;c__Vicinamibacteria;o__Vicinamibacterales;f__UBA2999;g__12-FULL-67-14b;s__Unclassified	METABOLISM	H	Coenzyme transport and metabolism	172
MAG23	d__Bacteria;p__Acidobacteriota;c__Vicinamibacteria;o__Vicinamibacterales;f__UBA2999;g__12-FULL-67-14b;s__Unclassified	METABOLISM	I	Lipid transport and metabolism	147
MAG23	d__Bacteria;p__Acidobacteriota;c__Vicinamibacteria;o__Vicinamibacterales;f__UBA2999;g__12-FULL-67-14b;s__Unclassified	METABOLISM	P	Inorganic ion transport and metabolism	171
MAG23	d__Bacteria;p__Acidobacteriota;c__Vicinamibacteria;o__Vicinamibacterales;f__UBA2999;g__12-FULL-67-14b;s__Unclassified	METABOLISM	Q	Secondary metabolites biosynthesis, transport and catabolism	90
MAG23	d__Bacteria;p__Acidobacteriota;c__Vicinamibacteria;o__Vicinamibacterales;f__UBA2999;g__12-FULL-67-14b;s__Unclassified	POORLY CHARACTERIZED	R	General function prediction only	275
MAG23	d__Bacteria;p__Acidobacteriota;c__Vicinamibacteria;o__Vicinamibacterales;f__UBA2999;g__12-FULL-67-14b;s__Unclassified	POORLY CHARACTERIZED	S	Function unknown	102
MAG230	d__Bacteria;p__Actinomycetota;c__Actinomycetia;o__Mycobacteriales;f__Mycobacteriaceae;g__Dietzia;s__Unclassified	CELLULAR PROCESSES AND SIGNALING	D	Cell cycle control, cell division, chromosome partitioning	37
MAG230	d__Bacteria;p__Actinomycetota;c__Actinomycetia;o__Mycobacteriales;f__Mycobacteriaceae;g__Dietzia;s__Unclassified	CELLULAR PROCESSES AND SIGNALING	M	Cell wall/membrane/envelope biogenesis	136
MAG230	d__Bacteria;p__Actinomycetota;c__Actinomycetia;o__Mycobacteriales;f__Mycobacteriaceae;g__Dietzia;s__Unclassified	CELLULAR PROCESSES AND SIGNALING	N	Cell motility	2
MAG230	d__Bacteria;p__Actinomycetota;c__Actinomycetia;o__Mycobacteriales;f__Mycobacteriaceae;g__Dietzia;s__Unclassified	CELLULAR PROCESSES AND SIGNALING	O	Posttranslational modification, protein turnover, chaperones	79
MAG230	d__Bacteria;p__Actinomycetota;c__Actinomycetia;o__Mycobacteriales;f__Mycobacteriaceae;g__Dietzia;s__Unclassified	CELLULAR PROCESSES AND SIGNALING	T	Signal transduction mechanisms	89
MAG230	d__Bacteria;p__Actinomycetota;c__Actinomycetia;o__Mycobacteriales;f__Mycobacteriaceae;g__Dietzia;s__Unclassified	CELLULAR PROCESSES AND SIGNALING	U	Intracellular trafficking, secretion, and vesicular transport	12
MAG230	d__Bacteria;p__Actinomycetota;c__Actinomycetia;o__Mycobacteriales;f__Mycobacteriaceae;g__Dietzia;s__Unclassified	CELLULAR PROCESSES AND SIGNALING	V	Defense mechanisms	69
MAG230	d__Bacteria;p__Actinomycetota;c__Actinomycetia;o__Mycobacteriales;f__Mycobacteriaceae;g__Dietzia;s__Unclassified	CELLULAR PROCESSES AND SIGNALING	X	Mobilome: prophages, transposons	6
MAG230	d__Bacteria;p__Actinomycetota;c__Actinomycetia;o__Mycobacteriales;f__Mycobacteriaceae;g__Dietzia;s__Unclassified	INFORMATION STORAGE AND PROCESSING	A	RNA processing and modification	1
MAG230	d__Bacteria;p__Actinomycetota;c__Actinomycetia;o__Mycobacteriales;f__Mycobacteriaceae;g__Dietzia;s__Unclassified	INFORMATION STORAGE AND PROCESSING	J	Translation, ribosomal structure and biogenesis	139
MAG230	d__Bacteria;p__Actinomycetota;c__Actinomycetia;o__Mycobacteriales;f__Mycobacteriaceae;g__Dietzia;s__Unclassified	INFORMATION STORAGE AND PROCESSING	K	Transcription	157
MAG230	d__Bacteria;p__Actinomycetota;c__Actinomycetia;o__Mycobacteriales;f__Mycobacteriaceae;g__Dietzia;s__Unclassified	INFORMATION STORAGE AND PROCESSING	L	Replication, recombination and repair	84
MAG230	d__Bacteria;p__Actinomycetota;c__Actinomycetia;o__Mycobacteriales;f__Mycobacteriaceae;g__Dietzia;s__Unclassified	METABOLISM	C	Energy production and conversion	129
MAG230	d__Bacteria;p__Actinomycetota;c__Actinomycetia;o__Mycobacteriales;f__Mycobacteriaceae;g__Dietzia;s__Unclassified	METABOLISM	E	Amino acid transport and metabolism	183
MAG230	d__Bacteria;p__Actinomycetota;c__Actinomycetia;o__Mycobacteriales;f__Mycobacteriaceae;g__Dietzia;s__Unclassified	METABOLISM	F	Nucleotide transport and metabolism	75
MAG230	d__Bacteria;p__Actinomycetota;c__Actinomycetia;o__Mycobacteriales;f__Mycobacteriaceae;g__Dietzia;s__Unclassified	METABOLISM	G	Carbohydrate transport and metabolism	143
MAG230	d__Bacteria;p__Actinomycetota;c__Actinomycetia;o__Mycobacteriales;f__Mycobacteriaceae;g__Dietzia;s__Unclassified	METABOLISM	H	Coenzyme transport and metabolism	179
MAG230	d__Bacteria;p__Actinomycetota;c__Actinomycetia;o__Mycobacteriales;f__Mycobacteriaceae;g__Dietzia;s__Unclassified	METABOLISM	I	Lipid transport and metabolism	227
MAG230	d__Bacteria;p__Actinomycetota;c__Actinomycetia;o__Mycobacteriales;f__Mycobacteriaceae;g__Dietzia;s__Unclassified	METABOLISM	P	Inorganic ion transport and metabolism	127
MAG230	d__Bacteria;p__Actinomycetota;c__Actinomycetia;o__Mycobacteriales;f__Mycobacteriaceae;g__Dietzia;s__Unclassified	METABOLISM	Q	Secondary metabolites biosynthesis, transport and catabolism	42
MAG230	d__Bacteria;p__Actinomycetota;c__Actinomycetia;o__Mycobacteriales;f__Mycobacteriaceae;g__Dietzia;s__Unclassified	POORLY CHARACTERIZED	R	General function prediction only	181
MAG230	d__Bacteria;p__Actinomycetota;c__Actinomycetia;o__Mycobacteriales;f__Mycobacteriaceae;g__Dietzia;s__Unclassified	POORLY CHARACTERIZED	S	Function unknown	72
MAG232	d__Bacteria;p__Pseudomonadota;c__Gammaproteobacteria;o__Pseudomonadales;f__Moraxellaceae;g__Psychrobacter;s__Psychrobacter pasteurii	CELLULAR PROCESSES AND SIGNALING	D	Cell cycle control, cell division, chromosome partitioning	33
MAG232	d__Bacteria;p__Pseudomonadota;c__Gammaproteobacteria;o__Pseudomonadales;f__Moraxellaceae;g__Psychrobacter;s__Psychrobacter pasteurii	CELLULAR PROCESSES AND SIGNALING	M	Cell wall/membrane/envelope biogenesis	134
MAG232	d__Bacteria;p__Pseudomonadota;c__Gammaproteobacteria;o__Pseudomonadales;f__Moraxellaceae;g__Psychrobacter;s__Psychrobacter pasteurii	CELLULAR PROCESSES AND SIGNALING	N	Cell motility	18
MAG232	d__Bacteria;p__Pseudomonadota;c__Gammaproteobacteria;o__Pseudomonadales;f__Moraxellaceae;g__Psychrobacter;s__Psychrobacter pasteurii	CELLULAR PROCESSES AND SIGNALING	O	Posttranslational modification, protein turnover, chaperones	105
MAG232	d__Bacteria;p__Pseudomonadota;c__Gammaproteobacteria;o__Pseudomonadales;f__Moraxellaceae;g__Psychrobacter;s__Psychrobacter pasteurii	CELLULAR PROCESSES AND SIGNALING	T	Signal transduction mechanisms	66
MAG232	d__Bacteria;p__Pseudomonadota;c__Gammaproteobacteria;o__Pseudomonadales;f__Moraxellaceae;g__Psychrobacter;s__Psychrobacter pasteurii	CELLULAR PROCESSES AND SIGNALING	U	Intracellular trafficking, secretion, and vesicular transport	23
MAG232	d__Bacteria;p__Pseudomonadota;c__Gammaproteobacteria;o__Pseudomonadales;f__Moraxellaceae;g__Psychrobacter;s__Psychrobacter pasteurii	CELLULAR PROCESSES AND SIGNALING	V	Defense mechanisms	68
MAG232	d__Bacteria;p__Pseudomonadota;c__Gammaproteobacteria;o__Pseudomonadales;f__Moraxellaceae;g__Psychrobacter;s__Psychrobacter pasteurii	CELLULAR PROCESSES AND SIGNALING	W	Extracellular structures	12
MAG232	d__Bacteria;p__Pseudomonadota;c__Gammaproteobacteria;o__Pseudomonadales;f__Moraxellaceae;g__Psychrobacter;s__Psychrobacter pasteurii	CELLULAR PROCESSES AND SIGNALING	X	Mobilome: prophages, transposons	63
MAG232	d__Bacteria;p__Pseudomonadota;c__Gammaproteobacteria;o__Pseudomonadales;f__Moraxellaceae;g__Psychrobacter;s__Psychrobacter pasteurii	CELLULAR PROCESSES AND SIGNALING	Z	Cytoskeleton	2
MAG232	d__Bacteria;p__Pseudomonadota;c__Gammaproteobacteria;o__Pseudomonadales;f__Moraxellaceae;g__Psychrobacter;s__Psychrobacter pasteurii	INFORMATION STORAGE AND PROCESSING	A	RNA processing and modification	1
MAG232	d__Bacteria;p__Pseudomonadota;c__Gammaproteobacteria;o__Pseudomonadales;f__Moraxellaceae;g__Psychrobacter;s__Psychrobacter pasteurii	INFORMATION STORAGE AND PROCESSING	J	Translation, ribosomal structure and biogenesis	195
MAG232	d__Bacteria;p__Pseudomonadota;c__Gammaproteobacteria;o__Pseudomonadales;f__Moraxellaceae;g__Psychrobacter;s__Psychrobacter pasteurii	INFORMATION STORAGE AND PROCESSING	K	Transcription	74
MAG232	d__Bacteria;p__Pseudomonadota;c__Gammaproteobacteria;o__Pseudomonadales;f__Moraxellaceae;g__Psychrobacter;s__Psychrobacter pasteurii	INFORMATION STORAGE AND PROCESSING	L	Replication, recombination and repair	87
MAG232	d__Bacteria;p__Pseudomonadota;c__Gammaproteobacteria;o__Pseudomonadales;f__Moraxellaceae;g__Psychrobacter;s__Psychrobacter pasteurii	METABOLISM	C	Energy production and conversion	151
MAG232	d__Bacteria;p__Pseudomonadota;c__Gammaproteobacteria;o__Pseudomonadales;f__Moraxellaceae;g__Psychrobacter;s__Psychrobacter pasteurii	METABOLISM	E	Amino acid transport and metabolism	176
MAG232	d__Bacteria;p__Pseudomonadota;c__Gammaproteobacteria;o__Pseudomonadales;f__Moraxellaceae;g__Psychrobacter;s__Psychrobacter pasteurii	METABOLISM	F	Nucleotide transport and metabolism	55
MAG232	d__Bacteria;p__Pseudomonadota;c__Gammaproteobacteria;o__Pseudomonadales;f__Moraxellaceae;g__Psychrobacter;s__Psychrobacter pasteurii	METABOLISM	G	Carbohydrate transport and metabolism	52
MAG232	d__Bacteria;p__Pseudomonadota;c__Gammaproteobacteria;o__Pseudomonadales;f__Moraxellaceae;g__Psychrobacter;s__Psychrobacter pasteurii	METABOLISM	H	Coenzyme transport and metabolism	135
MAG232	d__Bacteria;p__Pseudomonadota;c__Gammaproteobacteria;o__Pseudomonadales;f__Moraxellaceae;g__Psychrobacter;s__Psychrobacter pasteurii	METABOLISM	I	Lipid transport and metabolism	111
MAG232	d__Bacteria;p__Pseudomonadota;c__Gammaproteobacteria;o__Pseudomonadales;f__Moraxellaceae;g__Psychrobacter;s__Psychrobacter pasteurii	METABOLISM	P	Inorganic ion transport and metabolism	113
MAG232	d__Bacteria;p__Pseudomonadota;c__Gammaproteobacteria;o__Pseudomonadales;f__Moraxellaceae;g__Psychrobacter;s__Psychrobacter pasteurii	METABOLISM	Q	Secondary metabolites biosynthesis, transport and catabolism	23
MAG232	d__Bacteria;p__Pseudomonadota;c__Gammaproteobacteria;o__Pseudomonadales;f__Moraxellaceae;g__Psychrobacter;s__Psychrobacter pasteurii	POORLY CHARACTERIZED	R	General function prediction only	148
MAG232	d__Bacteria;p__Pseudomonadota;c__Gammaproteobacteria;o__Pseudomonadales;f__Moraxellaceae;g__Psychrobacter;s__Psychrobacter pasteurii	POORLY CHARACTERIZED	S	Function unknown	82
MAG235	d__Bacteria;p__Patescibacteria;c__Saccharimonadia;o__Saccharimonadales;f__EFPC-124;g__EFPC-124;s__Unclassified	CELLULAR PROCESSES AND SIGNALING	D	Cell cycle control, cell division, chromosome partitioning	13
MAG235	d__Bacteria;p__Patescibacteria;c__Saccharimonadia;o__Saccharimonadales;f__EFPC-124;g__EFPC-124;s__Unclassified	CELLULAR PROCESSES AND SIGNALING	M	Cell wall/membrane/envelope biogenesis	68
MAG235	d__Bacteria;p__Patescibacteria;c__Saccharimonadia;o__Saccharimonadales;f__EFPC-124;g__EFPC-124;s__Unclassified	CELLULAR PROCESSES AND SIGNALING	N	Cell motility	22
MAG235	d__Bacteria;p__Patescibacteria;c__Saccharimonadia;o__Saccharimonadales;f__EFPC-124;g__EFPC-124;s__Unclassified	CELLULAR PROCESSES AND SIGNALING	O	Posttranslational modification, protein turnover, chaperones	41
MAG235	d__Bacteria;p__Patescibacteria;c__Saccharimonadia;o__Saccharimonadales;f__EFPC-124;g__EFPC-124;s__Unclassified	CELLULAR PROCESSES AND SIGNALING	T	Signal transduction mechanisms	35
MAG235	d__Bacteria;p__Patescibacteria;c__Saccharimonadia;o__Saccharimonadales;f__EFPC-124;g__EFPC-124;s__Unclassified	CELLULAR PROCESSES AND SIGNALING	U	Intracellular trafficking, secretion, and vesicular transport	27
MAG235	d__Bacteria;p__Patescibacteria;c__Saccharimonadia;o__Saccharimonadales;f__EFPC-124;g__EFPC-124;s__Unclassified	CELLULAR PROCESSES AND SIGNALING	V	Defense mechanisms	14
MAG235	d__Bacteria;p__Patescibacteria;c__Saccharimonadia;o__Saccharimonadales;f__EFPC-124;g__EFPC-124;s__Unclassified	CELLULAR PROCESSES AND SIGNALING	W	Extracellular structures	14
MAG235	d__Bacteria;p__Patescibacteria;c__Saccharimonadia;o__Saccharimonadales;f__EFPC-124;g__EFPC-124;s__Unclassified	CELLULAR PROCESSES AND SIGNALING	X	Mobilome: prophages, transposons	1
MAG235	d__Bacteria;p__Patescibacteria;c__Saccharimonadia;o__Saccharimonadales;f__EFPC-124;g__EFPC-124;s__Unclassified	CELLULAR PROCESSES AND SIGNALING	Z	Cytoskeleton	1
MAG235	d__Bacteria;p__Patescibacteria;c__Saccharimonadia;o__Saccharimonadales;f__EFPC-124;g__EFPC-124;s__Unclassified	INFORMATION STORAGE AND PROCESSING	A	RNA processing and modification	1
MAG235	d__Bacteria;p__Patescibacteria;c__Saccharimonadia;o__Saccharimonadales;f__EFPC-124;g__EFPC-124;s__Unclassified	INFORMATION STORAGE AND PROCESSING	J	Translation, ribosomal structure and biogenesis	122
MAG235	d__Bacteria;p__Patescibacteria;c__Saccharimonadia;o__Saccharimonadales;f__EFPC-124;g__EFPC-124;s__Unclassified	INFORMATION STORAGE AND PROCESSING	K	Transcription	46
MAG235	d__Bacteria;p__Patescibacteria;c__Saccharimonadia;o__Saccharimonadales;f__EFPC-124;g__EFPC-124;s__Unclassified	INFORMATION STORAGE AND PROCESSING	L	Replication, recombination and repair	68
MAG235	d__Bacteria;p__Patescibacteria;c__Saccharimonadia;o__Saccharimonadales;f__EFPC-124;g__EFPC-124;s__Unclassified	METABOLISM	C	Energy production and conversion	34
MAG235	d__Bacteria;p__Patescibacteria;c__Saccharimonadia;o__Saccharimonadales;f__EFPC-124;g__EFPC-124;s__Unclassified	METABOLISM	E	Amino acid transport and metabolism	14
MAG235	d__Bacteria;p__Patescibacteria;c__Saccharimonadia;o__Saccharimonadales;f__EFPC-124;g__EFPC-124;s__Unclassified	METABOLISM	F	Nucleotide transport and metabolism	26
MAG235	d__Bacteria;p__Patescibacteria;c__Saccharimonadia;o__Saccharimonadales;f__EFPC-124;g__EFPC-124;s__Unclassified	METABOLISM	G	Carbohydrate transport and metabolism	42
MAG235	d__Bacteria;p__Patescibacteria;c__Saccharimonadia;o__Saccharimonadales;f__EFPC-124;g__EFPC-124;s__Unclassified	METABOLISM	H	Coenzyme transport and metabolism	17
MAG235	d__Bacteria;p__Patescibacteria;c__Saccharimonadia;o__Saccharimonadales;f__EFPC-124;g__EFPC-124;s__Unclassified	METABOLISM	I	Lipid transport and metabolism	15
MAG235	d__Bacteria;p__Patescibacteria;c__Saccharimonadia;o__Saccharimonadales;f__EFPC-124;g__EFPC-124;s__Unclassified	METABOLISM	P	Inorganic ion transport and metabolism	18
MAG235	d__Bacteria;p__Patescibacteria;c__Saccharimonadia;o__Saccharimonadales;f__EFPC-124;g__EFPC-124;s__Unclassified	METABOLISM	Q	Secondary metabolites biosynthesis, transport and catabolism	4
MAG235	d__Bacteria;p__Patescibacteria;c__Saccharimonadia;o__Saccharimonadales;f__EFPC-124;g__EFPC-124;s__Unclassified	POORLY CHARACTERIZED	R	General function prediction only	37
MAG235	d__Bacteria;p__Patescibacteria;c__Saccharimonadia;o__Saccharimonadales;f__EFPC-124;g__EFPC-124;s__Unclassified	POORLY CHARACTERIZED	S	Function unknown	24
MAG237	d__Bacteria;p__Pseudomonadota;c__Alphaproteobacteria;o__Rhizobiales;f__Rhizobiaceae;g__Paenochrobactrum;s__Paenochrobactrum gallinarii	CELLULAR PROCESSES AND SIGNALING	D	Cell cycle control, cell division, chromosome partitioning	30
MAG237	d__Bacteria;p__Pseudomonadota;c__Alphaproteobacteria;o__Rhizobiales;f__Rhizobiaceae;g__Paenochrobactrum;s__Paenochrobactrum gallinarii	CELLULAR PROCESSES AND SIGNALING	M	Cell wall/membrane/envelope biogenesis	130
MAG237	d__Bacteria;p__Pseudomonadota;c__Alphaproteobacteria;o__Rhizobiales;f__Rhizobiaceae;g__Paenochrobactrum;s__Paenochrobactrum gallinarii	CELLULAR PROCESSES AND SIGNALING	N	Cell motility	13
MAG237	d__Bacteria;p__Pseudomonadota;c__Alphaproteobacteria;o__Rhizobiales;f__Rhizobiaceae;g__Paenochrobactrum;s__Paenochrobactrum gallinarii	CELLULAR PROCESSES AND SIGNALING	O	Posttranslational modification, protein turnover, chaperones	113
MAG237	d__Bacteria;p__Pseudomonadota;c__Alphaproteobacteria;o__Rhizobiales;f__Rhizobiaceae;g__Paenochrobactrum;s__Paenochrobactrum gallinarii	CELLULAR PROCESSES AND SIGNALING	T	Signal transduction mechanisms	88
MAG237	d__Bacteria;p__Pseudomonadota;c__Alphaproteobacteria;o__Rhizobiales;f__Rhizobiaceae;g__Paenochrobactrum;s__Paenochrobactrum gallinarii	CELLULAR PROCESSES AND SIGNALING	U	Intracellular trafficking, secretion, and vesicular transport	15
MAG237	d__Bacteria;p__Pseudomonadota;c__Alphaproteobacteria;o__Rhizobiales;f__Rhizobiaceae;g__Paenochrobactrum;s__Paenochrobactrum gallinarii	CELLULAR PROCESSES AND SIGNALING	V	Defense mechanisms	44
MAG237	d__Bacteria;p__Pseudomonadota;c__Alphaproteobacteria;o__Rhizobiales;f__Rhizobiaceae;g__Paenochrobactrum;s__Paenochrobactrum gallinarii	CELLULAR PROCESSES AND SIGNALING	W	Extracellular structures	4
MAG237	d__Bacteria;p__Pseudomonadota;c__Alphaproteobacteria;o__Rhizobiales;f__Rhizobiaceae;g__Paenochrobactrum;s__Paenochrobactrum gallinarii	CELLULAR PROCESSES AND SIGNALING	X	Mobilome: prophages, transposons	24
MAG237	d__Bacteria;p__Pseudomonadota;c__Alphaproteobacteria;o__Rhizobiales;f__Rhizobiaceae;g__Paenochrobactrum;s__Paenochrobactrum gallinarii	INFORMATION STORAGE AND PROCESSING	J	Translation, ribosomal structure and biogenesis	142
MAG237	d__Bacteria;p__Pseudomonadota;c__Alphaproteobacteria;o__Rhizobiales;f__Rhizobiaceae;g__Paenochrobactrum;s__Paenochrobactrum gallinarii	INFORMATION STORAGE AND PROCESSING	K	Transcription	138
MAG237	d__Bacteria;p__Pseudomonadota;c__Alphaproteobacteria;o__Rhizobiales;f__Rhizobiaceae;g__Paenochrobactrum;s__Paenochrobactrum gallinarii	INFORMATION STORAGE AND PROCESSING	L	Replication, recombination and repair	84
MAG237	d__Bacteria;p__Pseudomonadota;c__Alphaproteobacteria;o__Rhizobiales;f__Rhizobiaceae;g__Paenochrobactrum;s__Paenochrobactrum gallinarii	METABOLISM	C	Energy production and conversion	130
MAG237	d__Bacteria;p__Pseudomonadota;c__Alphaproteobacteria;o__Rhizobiales;f__Rhizobiaceae;g__Paenochrobactrum;s__Paenochrobactrum gallinarii	METABOLISM	E	Amino acid transport and metabolism	305
MAG237	d__Bacteria;p__Pseudomonadota;c__Alphaproteobacteria;o__Rhizobiales;f__Rhizobiaceae;g__Paenochrobactrum;s__Paenochrobactrum gallinarii	METABOLISM	F	Nucleotide transport and metabolism	65
MAG237	d__Bacteria;p__Pseudomonadota;c__Alphaproteobacteria;o__Rhizobiales;f__Rhizobiaceae;g__Paenochrobactrum;s__Paenochrobactrum gallinarii	METABOLISM	G	Carbohydrate transport and metabolism	147
MAG237	d__Bacteria;p__Pseudomonadota;c__Alphaproteobacteria;o__Rhizobiales;f__Rhizobiaceae;g__Paenochrobactrum;s__Paenochrobactrum gallinarii	METABOLISM	H	Coenzyme transport and metabolism	152
MAG237	d__Bacteria;p__Pseudomonadota;c__Alphaproteobacteria;o__Rhizobiales;f__Rhizobiaceae;g__Paenochrobactrum;s__Paenochrobactrum gallinarii	METABOLISM	I	Lipid transport and metabolism	113
MAG237	d__Bacteria;p__Pseudomonadota;c__Alphaproteobacteria;o__Rhizobiales;f__Rhizobiaceae;g__Paenochrobactrum;s__Paenochrobactrum gallinarii	METABOLISM	P	Inorganic ion transport and metabolism	209
MAG237	d__Bacteria;p__Pseudomonadota;c__Alphaproteobacteria;o__Rhizobiales;f__Rhizobiaceae;g__Paenochrobactrum;s__Paenochrobactrum gallinarii	METABOLISM	Q	Secondary metabolites biosynthesis, transport and catabolism	36
MAG237	d__Bacteria;p__Pseudomonadota;c__Alphaproteobacteria;o__Rhizobiales;f__Rhizobiaceae;g__Paenochrobactrum;s__Paenochrobactrum gallinarii	POORLY CHARACTERIZED	R	General function prediction only	160
MAG237	d__Bacteria;p__Pseudomonadota;c__Alphaproteobacteria;o__Rhizobiales;f__Rhizobiaceae;g__Paenochrobactrum;s__Paenochrobactrum gallinarii	POORLY CHARACTERIZED	S	Function unknown	84
MAG238	d__Bacteria;p__Bacillota;c__Bacilli;o__Exiguobacterales;f__Exiguobacteraceae;g__Exiguobacterium_A;s__Exiguobacterium_A indicum	CELLULAR PROCESSES AND SIGNALING	D	Cell cycle control, cell division, chromosome partitioning	51
MAG238	d__Bacteria;p__Bacillota;c__Bacilli;o__Exiguobacterales;f__Exiguobacteraceae;g__Exiguobacterium_A;s__Exiguobacterium_A indicum	CELLULAR PROCESSES AND SIGNALING	M	Cell wall/membrane/envelope biogenesis	150
MAG238	d__Bacteria;p__Bacillota;c__Bacilli;o__Exiguobacterales;f__Exiguobacteraceae;g__Exiguobacterium_A;s__Exiguobacterium_A indicum	CELLULAR PROCESSES AND SIGNALING	N	Cell motility	45
MAG238	d__Bacteria;p__Bacillota;c__Bacilli;o__Exiguobacterales;f__Exiguobacteraceae;g__Exiguobacterium_A;s__Exiguobacterium_A indicum	CELLULAR PROCESSES AND SIGNALING	O	Posttranslational modification, protein turnover, chaperones	125
MAG238	d__Bacteria;p__Bacillota;c__Bacilli;o__Exiguobacterales;f__Exiguobacteraceae;g__Exiguobacterium_A;s__Exiguobacterium_A indicum	CELLULAR PROCESSES AND SIGNALING	T	Signal transduction mechanisms	206
MAG238	d__Bacteria;p__Bacillota;c__Bacilli;o__Exiguobacterales;f__Exiguobacteraceae;g__Exiguobacterium_A;s__Exiguobacterium_A indicum	CELLULAR PROCESSES AND SIGNALING	U	Intracellular trafficking, secretion, and vesicular transport	29
MAG238	d__Bacteria;p__Bacillota;c__Bacilli;o__Exiguobacterales;f__Exiguobacteraceae;g__Exiguobacterium_A;s__Exiguobacterium_A indicum	CELLULAR PROCESSES AND SIGNALING	V	Defense mechanisms	74
MAG238	d__Bacteria;p__Bacillota;c__Bacilli;o__Exiguobacterales;f__Exiguobacteraceae;g__Exiguobacterium_A;s__Exiguobacterium_A indicum	CELLULAR PROCESSES AND SIGNALING	W	Extracellular structures	10
MAG238	d__Bacteria;p__Bacillota;c__Bacilli;o__Exiguobacterales;f__Exiguobacteraceae;g__Exiguobacterium_A;s__Exiguobacterium_A indicum	CELLULAR PROCESSES AND SIGNALING	X	Mobilome: prophages, transposons	7
MAG238	d__Bacteria;p__Bacillota;c__Bacilli;o__Exiguobacterales;f__Exiguobacteraceae;g__Exiguobacterium_A;s__Exiguobacterium_A indicum	CELLULAR PROCESSES AND SIGNALING	Z	Cytoskeleton	1
MAG238	d__Bacteria;p__Bacillota;c__Bacilli;o__Exiguobacterales;f__Exiguobacteraceae;g__Exiguobacterium_A;s__Exiguobacterium_A indicum	INFORMATION STORAGE AND PROCESSING	J	Translation, ribosomal structure and biogenesis	224
MAG238	d__Bacteria;p__Bacillota;c__Bacilli;o__Exiguobacterales;f__Exiguobacteraceae;g__Exiguobacterium_A;s__Exiguobacterium_A indicum	INFORMATION STORAGE AND PROCESSING	K	Transcription	195
MAG238	d__Bacteria;p__Bacillota;c__Bacilli;o__Exiguobacterales;f__Exiguobacteraceae;g__Exiguobacterium_A;s__Exiguobacterium_A indicum	INFORMATION STORAGE AND PROCESSING	L	Replication, recombination and repair	124
MAG238	d__Bacteria;p__Bacillota;c__Bacilli;o__Exiguobacterales;f__Exiguobacteraceae;g__Exiguobacterium_A;s__Exiguobacterium_A indicum	METABOLISM	C	Energy production and conversion	149
MAG238	d__Bacteria;p__Bacillota;c__Bacilli;o__Exiguobacterales;f__Exiguobacteraceae;g__Exiguobacterium_A;s__Exiguobacterium_A indicum	METABOLISM	E	Amino acid transport and metabolism	249
MAG238	d__Bacteria;p__Bacillota;c__Bacilli;o__Exiguobacterales;f__Exiguobacteraceae;g__Exiguobacterium_A;s__Exiguobacterium_A indicum	METABOLISM	F	Nucleotide transport and metabolism	121
MAG238	d__Bacteria;p__Bacillota;c__Bacilli;o__Exiguobacterales;f__Exiguobacteraceae;g__Exiguobacterium_A;s__Exiguobacterium_A indicum	METABOLISM	G	Carbohydrate transport and metabolism	224
MAG238	d__Bacteria;p__Bacillota;c__Bacilli;o__Exiguobacterales;f__Exiguobacteraceae;g__Exiguobacterium_A;s__Exiguobacterium_A indicum	METABOLISM	H	Coenzyme transport and metabolism	165
MAG238	d__Bacteria;p__Bacillota;c__Bacilli;o__Exiguobacterales;f__Exiguobacteraceae;g__Exiguobacterium_A;s__Exiguobacterium_A indicum	METABOLISM	I	Lipid transport and metabolism	139
MAG238	d__Bacteria;p__Bacillota;c__Bacilli;o__Exiguobacterales;f__Exiguobacteraceae;g__Exiguobacterium_A;s__Exiguobacterium_A indicum	METABOLISM	P	Inorganic ion transport and metabolism	132
MAG238	d__Bacteria;p__Bacillota;c__Bacilli;o__Exiguobacterales;f__Exiguobacteraceae;g__Exiguobacterium_A;s__Exiguobacterium_A indicum	METABOLISM	Q	Secondary metabolites biosynthesis, transport and catabolism	48
MAG238	d__Bacteria;p__Bacillota;c__Bacilli;o__Exiguobacterales;f__Exiguobacteraceae;g__Exiguobacterium_A;s__Exiguobacterium_A indicum	POORLY CHARACTERIZED	R	General function prediction only	239
MAG238	d__Bacteria;p__Bacillota;c__Bacilli;o__Exiguobacterales;f__Exiguobacteraceae;g__Exiguobacterium_A;s__Exiguobacterium_A indicum	POORLY CHARACTERIZED	S	Function unknown	135
MAG24	d__Bacteria;p__Actinomycetota;c__Actinomycetia;o__Actinomycetales;f__Dermatophilaceae;g__Flexivirga;s__Unclassified	CELLULAR PROCESSES AND SIGNALING	D	Cell cycle control, cell division, chromosome partitioning	38
MAG24	d__Bacteria;p__Actinomycetota;c__Actinomycetia;o__Actinomycetales;f__Dermatophilaceae;g__Flexivirga;s__Unclassified	CELLULAR PROCESSES AND SIGNALING	M	Cell wall/membrane/envelope biogenesis	184
MAG24	d__Bacteria;p__Actinomycetota;c__Actinomycetia;o__Actinomycetales;f__Dermatophilaceae;g__Flexivirga;s__Unclassified	CELLULAR PROCESSES AND SIGNALING	N	Cell motility	18
MAG24	d__Bacteria;p__Actinomycetota;c__Actinomycetia;o__Actinomycetales;f__Dermatophilaceae;g__Flexivirga;s__Unclassified	CELLULAR PROCESSES AND SIGNALING	O	Posttranslational modification, protein turnover, chaperones	152
MAG24	d__Bacteria;p__Actinomycetota;c__Actinomycetia;o__Actinomycetales;f__Dermatophilaceae;g__Flexivirga;s__Unclassified	CELLULAR PROCESSES AND SIGNALING	T	Signal transduction mechanisms	160
MAG24	d__Bacteria;p__Actinomycetota;c__Actinomycetia;o__Actinomycetales;f__Dermatophilaceae;g__Flexivirga;s__Unclassified	CELLULAR PROCESSES AND SIGNALING	U	Intracellular trafficking, secretion, and vesicular transport	41
MAG24	d__Bacteria;p__Actinomycetota;c__Actinomycetia;o__Actinomycetales;f__Dermatophilaceae;g__Flexivirga;s__Unclassified	CELLULAR PROCESSES AND SIGNALING	V	Defense mechanisms	117
MAG24	d__Bacteria;p__Actinomycetota;c__Actinomycetia;o__Actinomycetales;f__Dermatophilaceae;g__Flexivirga;s__Unclassified	CELLULAR PROCESSES AND SIGNALING	W	Extracellular structures	22
MAG24	d__Bacteria;p__Actinomycetota;c__Actinomycetia;o__Actinomycetales;f__Dermatophilaceae;g__Flexivirga;s__Unclassified	CELLULAR PROCESSES AND SIGNALING	X	Mobilome: prophages, transposons	29
MAG24	d__Bacteria;p__Actinomycetota;c__Actinomycetia;o__Actinomycetales;f__Dermatophilaceae;g__Flexivirga;s__Unclassified	INFORMATION STORAGE AND PROCESSING	A	RNA processing and modification	1
MAG24	d__Bacteria;p__Actinomycetota;c__Actinomycetia;o__Actinomycetales;f__Dermatophilaceae;g__Flexivirga;s__Unclassified	INFORMATION STORAGE AND PROCESSING	J	Translation, ribosomal structure and biogenesis	216
MAG24	d__Bacteria;p__Actinomycetota;c__Actinomycetia;o__Actinomycetales;f__Dermatophilaceae;g__Flexivirga;s__Unclassified	INFORMATION STORAGE AND PROCESSING	K	Transcription	315
MAG24	d__Bacteria;p__Actinomycetota;c__Actinomycetia;o__Actinomycetales;f__Dermatophilaceae;g__Flexivirga;s__Unclassified	INFORMATION STORAGE AND PROCESSING	L	Replication, recombination and repair	148
MAG24	d__Bacteria;p__Actinomycetota;c__Actinomycetia;o__Actinomycetales;f__Dermatophilaceae;g__Flexivirga;s__Unclassified	METABOLISM	C	Energy production and conversion	215
MAG24	d__Bacteria;p__Actinomycetota;c__Actinomycetia;o__Actinomycetales;f__Dermatophilaceae;g__Flexivirga;s__Unclassified	METABOLISM	E	Amino acid transport and metabolism	339
MAG24	d__Bacteria;p__Actinomycetota;c__Actinomycetia;o__Actinomycetales;f__Dermatophilaceae;g__Flexivirga;s__Unclassified	METABOLISM	F	Nucleotide transport and metabolism	124
MAG24	d__Bacteria;p__Actinomycetota;c__Actinomycetia;o__Actinomycetales;f__Dermatophilaceae;g__Flexivirga;s__Unclassified	METABOLISM	G	Carbohydrate transport and metabolism	274
MAG24	d__Bacteria;p__Actinomycetota;c__Actinomycetia;o__Actinomycetales;f__Dermatophilaceae;g__Flexivirga;s__Unclassified	METABOLISM	H	Coenzyme transport and metabolism	233
MAG24	d__Bacteria;p__Actinomycetota;c__Actinomycetia;o__Actinomycetales;f__Dermatophilaceae;g__Flexivirga;s__Unclassified	METABOLISM	I	Lipid transport and metabolism	183
MAG24	d__Bacteria;p__Actinomycetota;c__Actinomycetia;o__Actinomycetales;f__Dermatophilaceae;g__Flexivirga;s__Unclassified	METABOLISM	P	Inorganic ion transport and metabolism	166
MAG24	d__Bacteria;p__Actinomycetota;c__Actinomycetia;o__Actinomycetales;f__Dermatophilaceae;g__Flexivirga;s__Unclassified	METABOLISM	Q	Secondary metabolites biosynthesis, transport and catabolism	70
MAG24	d__Bacteria;p__Actinomycetota;c__Actinomycetia;o__Actinomycetales;f__Dermatophilaceae;g__Flexivirga;s__Unclassified	POORLY CHARACTERIZED	R	General function prediction only	312
MAG24	d__Bacteria;p__Actinomycetota;c__Actinomycetia;o__Actinomycetales;f__Dermatophilaceae;g__Flexivirga;s__Unclassified	POORLY CHARACTERIZED	S	Function unknown	127
MAG242	d__Bacteria;p__Chloroflexota;c__Chloroflexia;o__Thermomicrobiales;f__UBA6265;g__UBA6265;s__Unclassified	CELLULAR PROCESSES AND SIGNALING	D	Cell cycle control, cell division, chromosome partitioning	28
MAG242	d__Bacteria;p__Chloroflexota;c__Chloroflexia;o__Thermomicrobiales;f__UBA6265;g__UBA6265;s__Unclassified	CELLULAR PROCESSES AND SIGNALING	M	Cell wall/membrane/envelope biogenesis	112
MAG242	d__Bacteria;p__Chloroflexota;c__Chloroflexia;o__Thermomicrobiales;f__UBA6265;g__UBA6265;s__Unclassified	CELLULAR PROCESSES AND SIGNALING	N	Cell motility	3
MAG242	d__Bacteria;p__Chloroflexota;c__Chloroflexia;o__Thermomicrobiales;f__UBA6265;g__UBA6265;s__Unclassified	CELLULAR PROCESSES AND SIGNALING	O	Posttranslational modification, protein turnover, chaperones	101
MAG242	d__Bacteria;p__Chloroflexota;c__Chloroflexia;o__Thermomicrobiales;f__UBA6265;g__UBA6265;s__Unclassified	CELLULAR PROCESSES AND SIGNALING	T	Signal transduction mechanisms	69
MAG242	d__Bacteria;p__Chloroflexota;c__Chloroflexia;o__Thermomicrobiales;f__UBA6265;g__UBA6265;s__Unclassified	CELLULAR PROCESSES AND SIGNALING	U	Intracellular trafficking, secretion, and vesicular transport	10
MAG242	d__Bacteria;p__Chloroflexota;c__Chloroflexia;o__Thermomicrobiales;f__UBA6265;g__UBA6265;s__Unclassified	CELLULAR PROCESSES AND SIGNALING	V	Defense mechanisms	65
MAG242	d__Bacteria;p__Chloroflexota;c__Chloroflexia;o__Thermomicrobiales;f__UBA6265;g__UBA6265;s__Unclassified	CELLULAR PROCESSES AND SIGNALING	X	Mobilome: prophages, transposons	7
MAG242	d__Bacteria;p__Chloroflexota;c__Chloroflexia;o__Thermomicrobiales;f__UBA6265;g__UBA6265;s__Unclassified	CELLULAR PROCESSES AND SIGNALING	Z	Cytoskeleton	7
MAG242	d__Bacteria;p__Chloroflexota;c__Chloroflexia;o__Thermomicrobiales;f__UBA6265;g__UBA6265;s__Unclassified	INFORMATION STORAGE AND PROCESSING	J	Translation, ribosomal structure and biogenesis	159
MAG242	d__Bacteria;p__Chloroflexota;c__Chloroflexia;o__Thermomicrobiales;f__UBA6265;g__UBA6265;s__Unclassified	INFORMATION STORAGE AND PROCESSING	K	Transcription	107
MAG242	d__Bacteria;p__Chloroflexota;c__Chloroflexia;o__Thermomicrobiales;f__UBA6265;g__UBA6265;s__Unclassified	INFORMATION STORAGE AND PROCESSING	L	Replication, recombination and repair	90
MAG242	d__Bacteria;p__Chloroflexota;c__Chloroflexia;o__Thermomicrobiales;f__UBA6265;g__UBA6265;s__Unclassified	METABOLISM	C	Energy production and conversion	104
MAG242	d__Bacteria;p__Chloroflexota;c__Chloroflexia;o__Thermomicrobiales;f__UBA6265;g__UBA6265;s__Unclassified	METABOLISM	E	Amino acid transport and metabolism	278
MAG242	d__Bacteria;p__Chloroflexota;c__Chloroflexia;o__Thermomicrobiales;f__UBA6265;g__UBA6265;s__Unclassified	METABOLISM	F	Nucleotide transport and metabolism	83
MAG242	d__Bacteria;p__Chloroflexota;c__Chloroflexia;o__Thermomicrobiales;f__UBA6265;g__UBA6265;s__Unclassified	METABOLISM	G	Carbohydrate transport and metabolism	198
MAG242	d__Bacteria;p__Chloroflexota;c__Chloroflexia;o__Thermomicrobiales;f__UBA6265;g__UBA6265;s__Unclassified	METABOLISM	H	Coenzyme transport and metabolism	120
MAG242	d__Bacteria;p__Chloroflexota;c__Chloroflexia;o__Thermomicrobiales;f__UBA6265;g__UBA6265;s__Unclassified	METABOLISM	I	Lipid transport and metabolism	66
MAG242	d__Bacteria;p__Chloroflexota;c__Chloroflexia;o__Thermomicrobiales;f__UBA6265;g__UBA6265;s__Unclassified	METABOLISM	P	Inorganic ion transport and metabolism	137
MAG242	d__Bacteria;p__Chloroflexota;c__Chloroflexia;o__Thermomicrobiales;f__UBA6265;g__UBA6265;s__Unclassified	METABOLISM	Q	Secondary metabolites biosynthesis, transport and catabolism	32
MAG242	d__Bacteria;p__Chloroflexota;c__Chloroflexia;o__Thermomicrobiales;f__UBA6265;g__UBA6265;s__Unclassified	POORLY CHARACTERIZED	R	General function prediction only	174
MAG242	d__Bacteria;p__Chloroflexota;c__Chloroflexia;o__Thermomicrobiales;f__UBA6265;g__UBA6265;s__Unclassified	POORLY CHARACTERIZED	S	Function unknown	56
MAG243	d__Bacteria;p__Actinomycetota;c__Actinomycetia;o__Actinomycetales;f__Microbacteriaceae;g__Microbacterium;s__Unclassified	CELLULAR PROCESSES AND SIGNALING	D	Cell cycle control, cell division, chromosome partitioning	25
MAG243	d__Bacteria;p__Actinomycetota;c__Actinomycetia;o__Actinomycetales;f__Microbacteriaceae;g__Microbacterium;s__Unclassified	CELLULAR PROCESSES AND SIGNALING	M	Cell wall/membrane/envelope biogenesis	103
MAG243	d__Bacteria;p__Actinomycetota;c__Actinomycetia;o__Actinomycetales;f__Microbacteriaceae;g__Microbacterium;s__Unclassified	CELLULAR PROCESSES AND SIGNALING	N	Cell motility	30
MAG243	d__Bacteria;p__Actinomycetota;c__Actinomycetia;o__Actinomycetales;f__Microbacteriaceae;g__Microbacterium;s__Unclassified	CELLULAR PROCESSES AND SIGNALING	O	Posttranslational modification, protein turnover, chaperones	90
MAG243	d__Bacteria;p__Actinomycetota;c__Actinomycetia;o__Actinomycetales;f__Microbacteriaceae;g__Microbacterium;s__Unclassified	CELLULAR PROCESSES AND SIGNALING	T	Signal transduction mechanisms	79
MAG243	d__Bacteria;p__Actinomycetota;c__Actinomycetia;o__Actinomycetales;f__Microbacteriaceae;g__Microbacterium;s__Unclassified	CELLULAR PROCESSES AND SIGNALING	U	Intracellular trafficking, secretion, and vesicular transport	20
MAG243	d__Bacteria;p__Actinomycetota;c__Actinomycetia;o__Actinomycetales;f__Microbacteriaceae;g__Microbacterium;s__Unclassified	CELLULAR PROCESSES AND SIGNALING	V	Defense mechanisms	35
MAG243	d__Bacteria;p__Actinomycetota;c__Actinomycetia;o__Actinomycetales;f__Microbacteriaceae;g__Microbacterium;s__Unclassified	CELLULAR PROCESSES AND SIGNALING	W	Extracellular structures	10
MAG243	d__Bacteria;p__Actinomycetota;c__Actinomycetia;o__Actinomycetales;f__Microbacteriaceae;g__Microbacterium;s__Unclassified	CELLULAR PROCESSES AND SIGNALING	X	Mobilome: prophages, transposons	3
MAG243	d__Bacteria;p__Actinomycetota;c__Actinomycetia;o__Actinomycetales;f__Microbacteriaceae;g__Microbacterium;s__Unclassified	INFORMATION STORAGE AND PROCESSING	A	RNA processing and modification	1
MAG243	d__Bacteria;p__Actinomycetota;c__Actinomycetia;o__Actinomycetales;f__Microbacteriaceae;g__Microbacterium;s__Unclassified	INFORMATION STORAGE AND PROCESSING	J	Translation, ribosomal structure and biogenesis	95
MAG243	d__Bacteria;p__Actinomycetota;c__Actinomycetia;o__Actinomycetales;f__Microbacteriaceae;g__Microbacterium;s__Unclassified	INFORMATION STORAGE AND PROCESSING	K	Transcription	144
MAG243	d__Bacteria;p__Actinomycetota;c__Actinomycetia;o__Actinomycetales;f__Microbacteriaceae;g__Microbacterium;s__Unclassified	INFORMATION STORAGE AND PROCESSING	L	Replication, recombination and repair	89
MAG243	d__Bacteria;p__Actinomycetota;c__Actinomycetia;o__Actinomycetales;f__Microbacteriaceae;g__Microbacterium;s__Unclassified	METABOLISM	C	Energy production and conversion	69
MAG243	d__Bacteria;p__Actinomycetota;c__Actinomycetia;o__Actinomycetales;f__Microbacteriaceae;g__Microbacterium;s__Unclassified	METABOLISM	E	Amino acid transport and metabolism	190
MAG243	d__Bacteria;p__Actinomycetota;c__Actinomycetia;o__Actinomycetales;f__Microbacteriaceae;g__Microbacterium;s__Unclassified	METABOLISM	F	Nucleotide transport and metabolism	58
[truncated: 24,476 more rows]
